# Supplementary material for: Transcriptomic Leaf Profiling Reveals Differential Responses of the Two Most Traded Coffee Species to Elevated [CO2]
Source: MDPI journal article supplement (doi:10.3390/ijms21239211), 2020-12-03
Supplement: s1 [file s1]

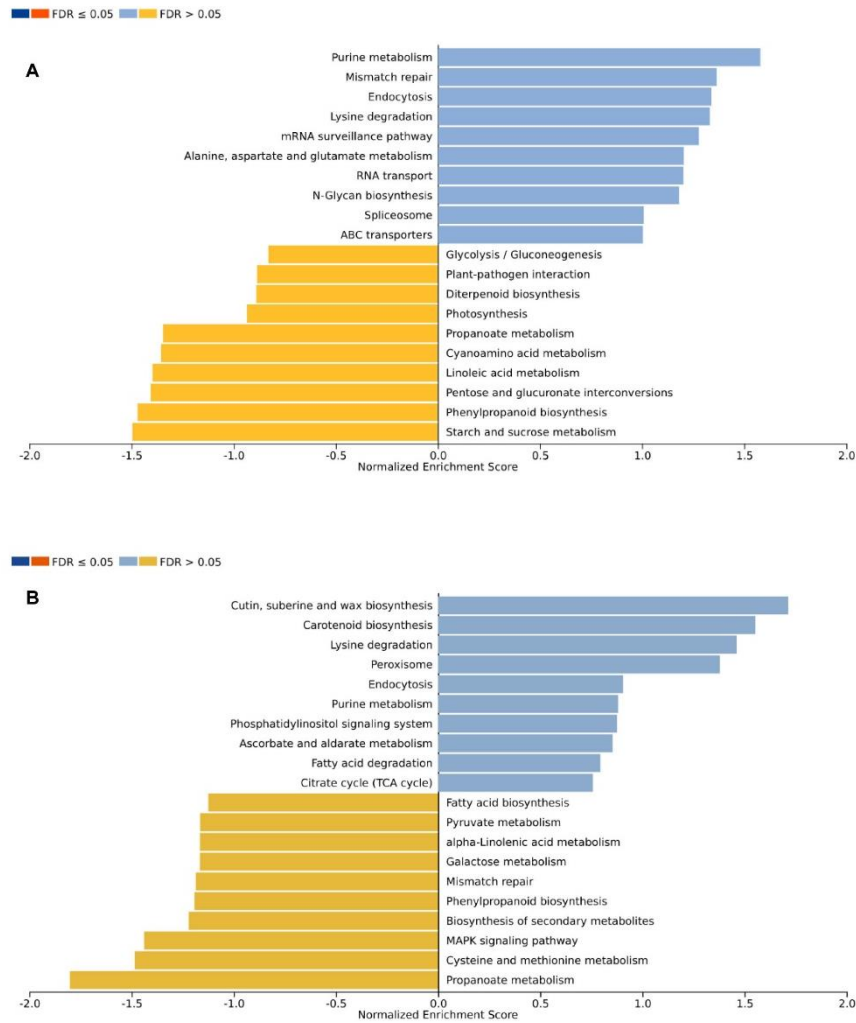

**Figure A2.** Enriched KEGG metabolic pathways found among DEGs in CL153 vs. Icatu at aCO<sub>2</sub> (A) and eCO<sub>2</sub> (B) showing the highest (blue) and lowest (yellow) normalized enrichment scores. Dark colors indicate statistically significant KEGG metabolic pathways under FDR < 0.05.
