# Supplementary material for: Transcriptomic Leaf Profiling Reveals Differential Responses of the Two Most Traded Coffee Species to Elevated [CO2]
Source: Int J Mol Sci. 2020 Dec 3;21(23):9211. doi: 10.3390/ijms21239211 (PMC7730880; doi:10.3390/ijms21239211)
Supplement: Supplementary file 1 [file ijms-21-09211-s001.zip › Table S2.docx]

**Table A2.** Total gene expression and differentially expressed genes (DEGs) counts of Icatu and CL153 samples, grown at aCO2 and aCO2. Genotype: Number of total expressed genes at aCO2 and at eCO2 in Icatu and CL153 genotypes, number of all, unknown and annotated DEGs at eCO2 vs. aCO2, with the respective number of up- and down-regulated DEGs. [CO2]: Number of total expressed genes by Icatu and by CL153 in aCO2 and eCO2, number of all, unknown and annotated and annotated DEGs in CL153 vs. Icatu, with the respective number of up- and down-regulated DEGs.

|  | **Expressed Genes** | |  | **DEGs** | | | | | | | | | | |
| --- | --- | --- | --- | --- | --- | --- | --- | --- | --- | --- | --- | --- | --- | --- |
|  | Control | Treatment |  | All | | |  | Unknown | | |  | Annotated | | |
| **Genotype** | **aCO2** | **eCO2** |  | **Up** | **Down** | **Total** |  | **Up** | **Down** | **Total** |  | **Up** | **Down** | **Total** |
|  |  |  |  |  |  |  |  |  |  |  |  |  |  |  |
| Icatu | 21714 | 21659 |  | 3357 | 3073 | 6430 |  | 822 | 713 | 1535 |  | 2535 | 2360 | 4895 |
| CL153 | 20728 | 21186 |  | 4338 | 4386 | 8724 |  | 1184 | 1054 | 2238 |  | 3154 | 3332 | 6486 |
|  |  |  |  |  |  |  |  |  |  |  |  |  |  |  |
| **[CO2]** | **Icatu** | **CL153** |  |  |  |  |  |  |  |  |  |  |  |  |
|  |  |  |  |  |  |  |  |  |  |  |  |  |  |  |
| aCO2 | 21714 | 20728 |  | 4118 | 4172 | 8290 |  | 1103 | 1273 | 2376 |  | 3015 | 2899 | 5914 |
| eCO2 | 21659 | 21186 |  | 4713 | 4713 | 9426 |  | 1300 | 1362 | 2662 |  | 3413 | 3351 | 6764 |
|  |  |  |  |  |  |  |  |  |  |  |  |  |  |  |
