# Supplementary material for: Transcriptomic Leaf Profiling Reveals Differential Responses of the Two Most Traded Coffee Species to Elevated [CO2]
Source: Int J Mol Sci. 2020 Dec 3;21(23):9211. doi: 10.3390/ijms21239211 (PMC7730880; doi:10.3390/ijms21239211)
Supplement: Supplementary file 1 [file ijms-21-09211-s001.zip › Table S3.xlsx]

## Sheet: up-regulated
Gene ID	ORF Name	Protein Name	Fold Change
Cc01_g09180	GSCOC_T00023964001	Flavonol 7-O-beta-glucosyltransferase UGT74F1	6.11452
Cc10_g08360	GSCOC_T00034397001	Uncharacterized protein	5.60686
Cc01_g05170	GSCOC_T00011473001	Omega-6 fatty acid endoplasmic reticulum isozyme 2	5.60032
Cc07_g12510	GSCOC_T00036863001	ATP-dependent zinc metalloprotease FTSH chloroplastic	5.19549
Cc02_g07390	GSCOC_T00029947001	Uncharacterized protein	5.18792
Cc05_g12830	GSCOC_T00021138001	Zinc finger CONSTANS-LIKE 10	4.8633
Cc08_g16300	GSCOC_T00035586001	Uncharacterized protein At5g39865	4.83388
Cc07_g04750	GSCOC_T00039735001	Zinc finger CONSTANS-LIKE 2	4.63703
Cc07_g12820	GSCOC_T00036828001	LHY	4.42113
Cc02_g05510	GSCOC_T00039062001	Aquaporin PIP subfamily	4.36503
Cc04_g17080	GSCOC_T00035835001	Aquaporin, MIP family, PIP subfamily	4.07796
Cc09_g02890	GSCOC_T00017616001	Uncharacterized protein	4.05802
Cc07_g02190	GSCOC_T00039402001	L-aspartate oxidase	3.98568
Cc08_g16800	GSCOC_T00035654001	2-hydroxymuconate semialdehyde hydrolase	3.97666
Cc02_g13580	GSCOC_T00029130001	Uncharacterized protein	3.96541
Cc02_g15160	GSCOC_T00013953001	CBL-interacting kinase 5	3.92308
Cc03_g08430	GSCOC_T00033260001	Uncharacterized protein	3.9028
Cc07_g03470	GSCOC_T00039578001	Cyclic dof factor 2	3.86884
Cc05_g13590	GSCOC_T00021041001	Transmembrane 189	3.86114
Cc11_g12870	GSCOC_T00032255001	Cyclic dof factor 2	3.84856
Cc02_g21620	GSCOC_T00014806001	Uncharacterized protein	3.79809
Cc06_g02330	GSCOC_T00023487001	xyloglucan endotransglucosylase hydrolase 22	3.76482
Cc07_g15190	GSCOC_T00036507001	BTB POZ domain-containing DOT3	3.72503
Cc06_g18960	GSCOC_T00028935001	Haloacid dehalogenase-like hydrolase domain-containing 3	3.68878
Cc06_g03390	GSCOC_T00023621001	REVEILLE 3	3.67395
Cc02_g39990	GSCOC_T00027631001	LHY	3.65513
Cc01_g10860	GSCOC_T00024200001	Bifunctional monodehydroascorbate reductase and carbonic anhydrase nectarin-3	3.62898
Cc04_g03540	GSCOC_T00022049001	Thionin 2	3.61306
Cc11_g14380	GSCOC_T00032065001	Auxin-induced 5NG4	3.54029
Cc06_g11830	GSCOC_T00041611001	Threonine chloroplastic	3.47046
Cc02_g19510	GSCOC_T00014519001	Snakin-1	3.46775
Cc06_g02260	GSCOC_T00023477001	Probable E3 ubiquitin- ligase HERC1	3.4359
Cc00_g11730	GSCOC_T00003631001	Tabersonine 16-O-methyltransferase	3.41005
Cc11_g16500	GSCOC_T00038190001	Uncharacterized protein	3.37756
Cc10_g11640	GSCOC_T00001438001	Uncharacterized protein	3.36692
Cc06_g09470	GSCOC_T00041911001	Serine incorporator 3	3.30678
Cc06_g07350	GSCOC_T00031274001	Sugar transport 7	3.2968
Cc00_g12040	GSCOC_T00005331001	Nitrate reductas	3.29671
Cc02_g16940	GSCOC_T00014196001	B-box zinc finger 22	3.2934
Cc10_g14390	GSCOC_T00012037001	Nitrate reductas	3.28194
Cc00_g31510	GSCOC_T00011616001	cysteine-rich receptor kinase 35	3.26271
Cc10_g11070	GSCOC_T00016674001	Flavonol synthase flavanone 3-hydroxylase	3.25768
Cc02_g29230	GSCOC_T00004503001	Flavonoid 3	3.23994
Cc02_g19370	GSCOC_T00014503001	Uncharacterized protein	3.22993
Cc01_g16640	GSCOC_T00016416001	Ninja-family AFP3	3.22915
Cc02_g12800	GSCOC_T00029235001	(E,E)-geranyllinalool synthase	3.17792
Cc09_g03820	GSCOC_T00017499001	12-oxophytodienoate reductase 1	3.17779
Cc03_g04820	GSCOC_T00026212001	Transcription factor bHLH92	3.17142
Cc11_g08190	GSCOC_T00032909001	Pectinesterase 2	3.17137
Cc03_g07470	GSCOC_T00026599001	F-box PP2-B10	3.12142
Cc00_g20080	GSCOC_T00006211001	ABC transporter G family member 11	3.10587
Cc04_g11500	GSCOC_T00037341001	Tropinone reductase homolog At1g07440	3.10424
Cc04_g14210	GSCOC_T00035952001	Probable boron transporter 2	3.09894
Cc05_g12000	GSCOC_T00021245001	SPA1-RELATED 4	3.09411
Cc05_g03140	GSCOC_T00033506001	NRT1 PTR FAMILY	3.08293
Cc00_g01720	GSCOC_T00002825001	Uncharacterized protein	3.07493
Cc00_g01650	GSCOC_T00002754001	Ribosomal mitochondrial	3.06669
Cc07_g18780	GSCOC_T00018698001	ABC transporter G family member 10	3.06192
Cc01_g15050	GSCOC_T00016611001	Uncharacterized protein	3.05244
Cc06_g03320	GSCOC_T00023613001	E3 ubiquitin- ligase RNF181 homolog	3.05219
Cc11_g11930	GSCOC_T00032381001	Ninja-family AFP3	3.04413
Cc04_g06900	GSCOC_T00022491001	Non-specific lipid-transfer 2	3.03891
Cc00_g32650	GSCOC_T00003357001	Probable pectate lyase 15	3.03849
Cc10_g03550	GSCOC_T00024882001	Uncharacterized protein	3.03126
Cc11_g07740	GSCOC_T00018010001	SEC14 cytosolic factor	3.01989
Cc01_g16330	GSCOC_T00016455001	Auxin-induced in root cultures 12	2.99589
Cc11_g16090	GSCOC_T00038141001	Myosin heavy chain kinase B	2.98638
Cc02_g29220	GSCOC_T00004501001	Cytochrome P450 750A1	2.98597
Cc05_g12010	GSCOC_T00021244001	SPA1-RELATED 3	2.98405
Cc06_g13550	GSCOC_T00041381001	Kaempferol 3-O-beta-D-galactosyltransferase	2.98178
Cc02_g17300	GSCOC_T00014241001	Cellulose synthase D3	2.96088
Cc00_g00340	GSCOC_T00036115001	Flavin-containing monooxygenase FMO GS-OX-like 2	2.95312
Cc04_g04040	GSCOC_T00022121001	Late embryogenesis abundant Dc3	2.95289
Cc05_g05670	GSCOC_T00035142001	zinc finger At1g68190	2.95129
Cc06_g04440	GSCOC_T00042953001	Uncharacterized protein	2.95037
Cc07_g09470	GSCOC_T00037237001	Uncharacterized protein	2.92228
Cc08_g16780	GSCOC_T00035651001	Homeobox-leucine zipper ATHB-7	2.91893
Cc06_g13410	GSCOC_T00041401001	Xyloglucan endotransglucosylase hydrolase 22	2.90451
Cc06_g23260	GSCOC_T00040597001	Uncharacterized protein	2.89523
Cc07_g18840	GSCOC_T00018686001	Gibberellin 20 oxidase 2	2.89106
Cc00_g18530	GSCOC_T00008822001	Cytochrome P450 71A2	2.88384
Cc00_g17020	GSCOC_T00005618001	Uncharacterized protein	2.86994
Cc00_g17350	GSCOC_T00004259001	LRR receptor-like serine threonine- kinase FLS2	2.85296
Cc01_g21240	GSCOC_T00005004001	Uncharacterized protein	2.82643
Cc02_g03440	GSCOC_T00020228001	Post-GPI attachment to s factor 3	2.80166
Cc03_g07610	GSCOC_T00026616001	Low-temperature-induced 65 kDa	2.78552
Cc00_g19460	GSCOC_T00012669001	Uncharacterized protein	2.78519
Cc01_g07240	GSCOC_T00030156001	1-aminocyclopropane-1-carboxylate oxidase homolog 12	2.75647
Cc06_g03900	GSCOC_T00023688001	Aquaporin PIP2-2	2.74591
Cc06_g13600	GSCOC_T00041373001	Pathogenesis-related PR-1	2.7418
Cc10_g14330	GSCOC_T00012024001	Uncharacterized protein	2.71454
Cc11_g07480	GSCOC_T00018049001	Receptor 12	2.71436
Cc02_g20420	GSCOC_T00014655001	Transcription factor bHLH18	2.71188
Cc11_g08360	GSCOC_T00032886001	MLP 31	2.71163
Cc07_g05610	GSCOC_T00039839001	Probable esterase PIR7A	2.7062
Cc06_g12040	GSCOC_T00041583001	Uncharacterized protein	2.67326
Cc03_g02000	GSCOC_T00025835001	Probable phosphatase 2C 40	2.65929
Cc03_g02730	GSCOC_T00025940001	phosphate chloroplastic	2.65512
Cc05_g14330	GSCOC_T00038831001	Indole-3-acetate O-methyltransferase 1	2.64171
Cc00_g25870	GSCOC_T00011906001	Uncharacterized protein	2.63631
Cc06_g20870	GSCOC_T00015855001	Mitogen-activated kinase kinase kinase ANP1	2.63107
Cc03_g09010	GSCOC_T00042727001	CYC02	2.62644
Cc07_g06020	GSCOC_T00039894001	Uncharacterized protein At3g61260	2.62476
Cc03_g09000	GSCOC_T00042731001	Glycine-rich	2.61523
Cc07_g13250	GSCOC_T00036766001	Aspartic ase nepenthesin-1	2.60955
Cc01_g17250	GSCOC_T00016348001	Uncharacterized protein	2.59719
Cc06_g15190	GSCOC_T00030867001	NADP-dependent glyceraldehyde-3-phosphate dehydrogenase	2.59618
Cc08_g02340	GSCOC_T00037702001	NRT1 PTR FAMILY	2.57595
Cc00_g12680	GSCOC_T00005848001	Glutathione transferase GST 23	2.56431
Cc02_g02690	GSCOC_T00020132001	Uncharacterized protein	2.55866
Cc07_g11100	GSCOC_T00037039001	Heavy metal-associated isoprenylated plant 26	2.5564
Cc00_g01730	GSCOC_T00002831001	Uncharacterized mitochondrial g00910	2.55356
Cc03_g10510	GSCOC_T00031070001	MDIS1-interacting receptor like kinase 2	2.55323
Cc05_g13070	GSCOC_T00021108001	(-)-germacrene D synthase	2.54971
Cc02_g26410	GSCOC_T00028611001	Glutathione transferase GST 23	2.54429
Cc00_g01250	GSCOC_T00007186001	Cytochrome P450 71A1	2.54182
Cc05_g06820	GSCOC_T00042197001	Uncharacterized protein At4g04980	2.54153
Cc01_g00180	GSCOC_T00012416001	Cytochrome P450 716B2	2.53631
Cc08_g12430	GSCOC_T00030484001	Probable pectinesterase 68	2.53546
Cc03_g06030	GSCOC_T00026380001	PROTON GRADIENT REGULATION chloroplastic	2.53545
Cc08_g08220	GSCOC_T00007248001	Molybdate transporter 2	2.53122
Cc02_g36770	GSCOC_T00003881001	Ferric reduction oxidase chloroplastic	2.52525
Cc08_g10800	GSCOC_T00027059001	Glutaredoxin-C6	2.52499
Cc11_g13920	GSCOC_T00032124001	Transcription factor MYB1R1	2.52427
Cc01_g16150	GSCOC_T00016475001	lipid-transfer DIR1	2.51876
Cc10_g11980	GSCOC_T00031880001	Chlorophyllide a chloroplastic	2.51609
Cc06_g07090	GSCOC_T00031305001	Universal stress A	2.51091
Cc10_g00330	GSCOC_T00024481001	Uncharacterized protein	2.50641
Cc00_g17120	GSCOC_T00003964001	UDP-glycosyltransferase 85A3	2.50504
Cc02_g39100	GSCOC_T00027764001	Hydroquinone glucosyltransferase	2.49527
Cc06_g08580	GSCOC_T00031111001	NRT1 PTR FAMILY	2.48126
Cc10_g06230	GSCOC_T00034687001	Laccase-14	2.47727
Cc01_g05590	GSCOC_T00027367001	Uncharacterized protein	2.47042
Cc00_g31870	GSCOC_T00001691001	Glutathione transferase GST 23	2.46941
Cc02_g17790	GSCOC_T00014307001	Polyol transporter 5	2.4669
Cc05_g07320	GSCOC_T00042259001	Transcription factor bHLH36	2.46367
Cc00_g21560	GSCOC_T00000840001	Probable WRKY transcription factor 72	2.46308
Cc04_g08830	GSCOC_T00022757001	CCA1	2.46096
Cc01_g10260	GSCOC_T00024109001	Zinc finger ZAT5	2.44436
Cc10_g03210	GSCOC_T00024843001	Auxilin-related 2	2.44411
Cc03_g02040	GSCOC_T00025839001	SRG1	2.43877
Cc02_g20120	GSCOC_T00014615001	Uncharacterized protein	2.42475
Cc10_g01830	GSCOC_T00024672001	Cytokinin riboside 5 -monophosphate phosphoribohydrolase LOG1	2.41866
Cc10_g03610	GSCOC_T00024892001	Myosin heavy chain kinase B	2.41522
Cc00_g01900	GSCOC_T00002988001	Uncharacterized protein	2.41476
Cc00_g33140	GSCOC_T00007369001	SPX domain-containing 1	2.3846
Cc02_g23600	GSCOC_T00015060001	NRT1 PTR FAMILY	2.38
Cc02_g36910	GSCOC_T00003860001	Uncharacterized protein	2.37348
Cc06_g05430	GSCOC_T00043093001	ABC transporter G family member 39	2.37193
Cc11_g07490	GSCOC_T00018048001	Leucine-rich repeat receptor kinase EMS1	2.35879
Cc06_g21560	GSCOC_T00001552001	8-hydroxyquercetin 8-O-methyltransferase	2.35669
Cc00_g15240	GSCOC_T00001826001	UDP-glycosyltransferase 74E2	2.3551
Cc00_g35100	GSCOC_T00004229001	Ent-kaur-16-ene chloroplastic	2.33723
Cc09_g09190	GSCOC_T00023086001	WRKY transcription factor 28	2.3354
Cc04_g12840	GSCOC_T00003258001	U-box domain-containing 19	2.33359
Cc04_g02120	GSCOC_T00021880001	Inorganic pyrophosphatase 2	2.33222
Cc11_g17430	GSCOC_T00038314001	Pyruvate dehydrogenase E1 component subunit beta- mitochondrial	2.32881
Cc00_g01610	GSCOC_T00002721001	Succinate dehydrogenase cytochrome b560 subunit	2.31836
Cc06_g10570	GSCOC_T00041761001	Probable pectinesterase 53	2.31551
Cc06_g01490	GSCOC_T00023369001	water chloroplastic	2.27349
Cc01_g15810	GSCOC_T00016515001	Flavonol 7-O-beta-glucosyltransferase UGT74F1	2.26421
Cc06_g08460	GSCOC_T00031128001	Peroxidase 25	2.24612
Cc03_g14520	GSCOC_T00026669001	Probable glutathione S-transferase	2.24357
Cc02_g21280	GSCOC_T00014765001	ABC transporter G family member 11	2.24169
Cc02_g07150	GSCOC_T00009480001	kDa class I heat shock 3	2.24081
Cc02_g30540	GSCOC_T00023779001	Beta-glucosidase 24	2.23629
Cc02_g04190	GSCOC_T00020324001	Trehalose-phosphate phosphatase A	2.23175
Cc11_g07530	GSCOC_T00018044001	LRR receptor-like serine threonine- kinase GSO1	2.23147
Cc10_g15550	GSCOC_T00033741001	Uncharacterized protein	2.23126
Cc01_g21250	GSCOC_T00005003001	Transcription factor MYB12	2.22936
Cc10_g15980	GSCOC_T00033803001	Endoglucanase 9	2.22344
Cc00_g13990	GSCOC_T00010020001	Exocyst complex component 7	2.22294
Cc00_g09520	GSCOC_T00004381001	Uncharacterized protein	2.22168
Cc02_g12170	GSCOC_T00029320001	zinc finger At1g68190	2.2213
Cc02_g33790	GSCOC_T00013092001	Probable linoleate 9S-lipoxygenase 5	2.21541
Cc02_g18130	GSCOC_T00014349001	Allene oxide synthase	2.21296
Cc00_g06420	GSCOC_T00004117001	(-)-germacrene D synthase	2.20046
Cc09_g07340	GSCOC_T00036274001	Uncharacterized oxidoreductase	2.19005
Cc05_g01750	GSCOC_T00015751001	Cytochrome P450 82G1	2.18634
Cc04_g14510	GSCOC_T00040693001	Subtilisin inhibitor 1	2.18511
Cc02_g11970	GSCOC_T00029349001	U-box domain-containing 8	2.18284
Cc10_g06890	GSCOC_T00034600001	UDP-glycosyltransferase 85A2	2.16719
Cc04_g10480	GSCOC_T00042600001	Adenine guanine permease AZG2	2.16479
Cc01_g07250	GSCOC_T00030157001	1-aminocyclopropane-1-carboxylate oxidase homolog	2.1641
Cc00_g01740	GSCOC_T00002838001	Uncharacterized protein	2.16178
Cc00_g17190	GSCOC_T00009143001	Beta-amylase chloroplastic	2.15845
Cc00_g26170	GSCOC_T00006050001	Glutathione S-transferase F12	2.15331
Cc09_g08660	GSCOC_T00020839001	LRR receptor-like serine threonine- kinase FLS2	2.15053
Cc11_g05930	GSCOC_T00020569001	Probable transmembrane ascorbate ferrireductase 3	2.14992
Cc06_g17810	GSCOC_T00040372001	Zeatin O-glucosyltransferase	2.14535
Cc02_g31430	GSCOC_T00027565001	Vinorine synthase	2.14485
Cc02_g11000	GSCOC_T00029467001	Uncharacterized protein	2.13968
Cc00_g20750	GSCOC_T00001383001	Phenylalanine ammonia-lyase	2.13676
Cc06_g00370	GSCOC_T00023212001	Uncharacterized protein	2.13279
Cc01_g07700	GSCOC_T00015443001	E3 ubiquitin- ligase PUB23	2.12859
Cc00_g01620	GSCOC_T00002732001	Uncharacterized protein	2.12571
Cc02_g34740	GSCOC_T00011780001	Uncharacterized protein	2.12538
Cc07_g02110	GSCOC_T00039392001	Dihydroflavonol 4-reductase	2.12
Cc02_g04180	GSCOC_T00020322001	Beta- soluble isoenzyme I	2.11186
Cc06_g02030	GSCOC_T00023443001	Probable glutathione S-transferase	2.10566
Cc08_g00930	GSCOC_T00038449001	Transcription factor HY5	2.09215
Cc07_g11750	GSCOC_T00036964001	Dehydrodolichyl diphosphate synthase 6	2.09012
Cc02_g06820	GSCOC_T00039233001	Probable aquaporin PIP1-2	2.08968
Cc10_g06970	GSCOC_T00034589001	UDP-glycosyltransferase 85A2	2.08952
Cc01_g21040	GSCOC_T00005028001	Endoglucanase 17	2.08808
Cc02_g06360	GSCOC_T00039164001	Gibberellin 2-beta-dioxygenase 3	2.08654
Cc05_g07890	GSCOC_T00016793001	8-hydroxyquercetin 8-O-methyltransferase	2.08584
Cc06_g06470	GSCOC_T00031379001	Uncharacterized protein	2.08448
Cc02_g01850	GSCOC_T00020022001	RNA polymerase sigma factor	2.07484
Cc02_g25350	GSCOC_T00028757001	Ankyrin repeat-containing ITN1	2.07428
Cc02_g24570	GSCOC_T00028867001	Uncharacterized protein	2.07384
Cc00_g01660	GSCOC_T00002755001	Uncharacterized protein	2.06962
Cc05_g13060	GSCOC_T00021109001	(-)-germacrene D synthase	2.0676
Cc11_g11950	GSCOC_T00032378001	Uncharacterized protein	2.06324
Cc02_g18540	GSCOC_T00014400001	CDPK-related kinase	2.0611
Cc02_g02860	GSCOC_T00020155001	Oxalate-- ligase	2.05518
Cc07_g18570	GSCOC_T00018734001	Ent-kaur-16-ene chloroplastic	2.05025
Cc08_g10170	GSCOC_T00026978001	LRR receptor-like serine threonine- kinase FLS2	2.04841
Cc08_g01800	GSCOC_T00038330001	Protein CbbY	2.04737
Cc00_g11770	GSCOC_T00003637001	Tabersonine 16-O-methyltransferase	2.04323
Cc00_g06550	GSCOC_T00005831001	Gibberellin 20 oxidase 1	2.04233
Cc02_g39780	GSCOC_T00027668001	Cytochrome P450 78A3	2.04153
Cc00_g28800	GSCOC_T00011418001	Isoflavone 7-O-methyltransferase	2.04147
Cc09_g07910	GSCOC_T00003777001	Monoglyceride lipase	2.04031
Cc02_g10980	GSCOC_T00029469001	U-box domain-containing 14	2.03574
Cc06_g13560	GSCOC_T00041380001	Anthocyanidin 3-O-glucosyltransferase	2.03438
Cc00_g32830	GSCOC_T00007840001	LRR receptor-like serine threonine- kinase GSO2	2.03297
Cc09_g02170	GSCOC_T00017710001	Aquaporin PIP2-1	2.02977
Cc05_g11900	GSCOC_T00021256001	Early nodulin 1	2.02932
Cc02_g24640	GSCOC_T00028859001	Transcription factor UNE10	2.02732
Cc11_g14570	GSCOC_T00032041001	U-box domain-containing 19	2.02528
Cc03_g15890	GSCOC_T00001649001	Ankyrin repeat SKIP35	2.02455
Cc00_g17200	GSCOC_T00009145001	Beta-amylase chloroplastic	2.01749
Cc02_g33950	GSCOC_T00008643001	Uncharacterized protein	2.01674
Cc02_g02030	GSCOC_T00020047001	ABC transporter C family member 10	2.01031
Cc06_g01500	GSCOC_T00023370001	Uncharacterized protein	2.00693
Cc05_g13880	GSCOC_T00021006001	Uncharacterized protein	2.00518
Cc03_g15200	GSCOC_T00026786001	UDP-glycosyltransferase 74E1	1.99843
Cc04_g09490	GSCOC_T00022838001	Uncharacterized protein	1.98987
Cc11_g16920	GSCOC_T00038245001	Uncharacterized protein	1.98826
Cc00_g13470	GSCOC_T00010147001	Uncharacterized protein	1.98449
Cc07_g05590	GSCOC_T00039836001	Probable esterase PIR7A	1.97874
Cc02_g18150	GSCOC_T00014351001	Myosin heavy chain kinase B	1.96572
Cc06_g13950	GSCOC_T00041325001	EG45-like domain containing 1	1.96328
Cc06_g09560	GSCOC_T00041898001	Aldehyde dehydrogenase family 2 member C4	1.96273
Cc02_g03460	GSCOC_T00020230001	Uncharacterized protein	1.96007
Cc04_g03940	GSCOC_T00022110001	(6-4)DNA photolyase	1.95656
Cc08_g11280	GSCOC_T00027127001	Receptor 12	1.95183
Cc05_g10510	GSCOC_T00021432001	Solanesyl diphosphate synthase 1	1.95132
Cc06_g09790	GSCOC_T00041869001	Pentatricopeptide repeat-containing At5g21222	1.94792
Cc08_g12550	GSCOC_T00030466001	Small heat shock chloroplastic	1.94334
Cc07_g08530	GSCOC_T00040230001	PLASTID MOVEMENT IMPAIRED 2	1.94256
Cc03_g10030	GSCOC_T00031002001	Uncharacterized hydrolase	1.94027
Cc05_g02690	GSCOC_T00020899001	ABC transporter C family member 10	1.94022
Cc02_g00010	GSCOC_T00019775001	DNA-binding SMUBP-2	1.93782
Cc02_g09760	GSCOC_T00029613001	Monoacylglycerol lipase ABHD6	1.9324
Cc11_g06540	GSCOC_T00020671001	Receptor 12	1.93066
Cc02_g38130	GSCOC_T00027903001	Probable glycerol-3-phosphate acyltransferase 8	1.92767
Cc02_g31520	GSCOC_T00027544001	Polyubiquitin 3	1.92638
Cc01_g13160	GSCOC_T00028278001	Abscisic acid 8 -hydroxylase 2	1.92469
Cc04_g14500	GSCOC_T00040692001	Ribulose bisphosphate carboxylase oxygenase activase chloroplastic	1.9219
Cc02_g29490	GSCOC_T00018382001	(-)-germacrene D synthase	1.92189
Cc02_g09290	GSCOC_T00029676001	Cytosolic 5 -nucleotidase 3	1.92138
Cc11_g10510	GSCOC_T00032568001	Uncharacterized protein	1.91846
Cc02_g31640	GSCOC_T00027519001	Uncharacterized protein	1.91563
Cc05_g07120	GSCOC_T00042235001	Uncharacterized protein	1.91526
Cc08_g10220	GSCOC_T00026985001	Probable LRR receptor-like serine threonine- kinase At3g47570	1.91513
Cc05_g07850	GSCOC_T00016789001	Tabersonine 16-O-methyltransferase	1.91356
Cc11_g15740	GSCOC_T00038092001	Inorganic phosphate transporter 2- chloroplastic	1.91348
Cc02_g07340	GSCOC_T00029952001	Delta-1-pyrroline-5-carboxylate synthase	1.91105
Cc07_g02180	GSCOC_T00039401001	Uncharacterized protein	1.9082
Cc08_g08050	GSCOC_T00013081001	Uncharacterized protein	1.89771
Cc05_g12740	GSCOC_T00021151001	Dynein light chain cytoplasmic	1.89561
Cc08_g07930	GSCOC_T00011897001	Probable receptor kinase At5g18500	1.89302
Cc00_g13480	GSCOC_T00010148001	Uncharacterized protein	1.89099
Cc07_g12020	GSCOC_T00036930001	Uncharacterized transporter YBR287W	1.88969
Cc06_g12120	GSCOC_T00041574001	Probable N-acetyltransferase san	1.88635
Cc05_g07590	GSCOC_T00016753001	Ethylene-responsive transcription factor 4	1.88613
Cc07_g09620	GSCOC_T00037218001	Late embryogenesis abundant D-29	1.88134
Cc10_g03270	GSCOC_T00024850001	Anthocyanidin 3-O-glucosyltransferase 5	1.8799
Cc06_g04630	GSCOC_T00042976001	UDP-glycosyltransferase 73C4	1.8793
Cc02_g00550	GSCOC_T00019839001	ABC transporter B family member 19	1.8778
Cc11_g06480	GSCOC_T00020664001	Uncharacterized protein	1.87686
Cc06_g03980	GSCOC_T00023699001	Phenylalanine ammonia-lyase	1.87278
Cc01_g16180	GSCOC_T00016472001	Uncharacterized protein	1.87003
Cc01_g09270	GSCOC_T00023975001	Uncharacterized protein	1.86931
Cc00_g30010	GSCOC_T00001095001	Heavy metal-associated isoprenylated plant 26	1.86835
Cc06_g17020	GSCOC_T00012644001	Receptor 12	1.86821
Cc10_g03590	GSCOC_T00024889001	Wall-associated receptor kinase-like 14	1.8682
Cc07_g13520	GSCOC_T00036726001	Uncharacterized protein	1.86806
Cc06_g13940	GSCOC_T00041327001	EG45-like domain containing 1	1.8669
Cc06_g22380	GSCOC_T00017200001	F-box At5g07610	1.86684
Cc11_g11970	GSCOC_T00032376001	Ureide permease 1	1.8631
Cc10_g13600	GSCOC_T00035263001	Probable calcium-binding CML44	1.86275
Cc04_g11340	GSCOC_T00037305001	Uncharacterized slr1419	1.85982
Cc11_g03140	GSCOC_T00025462001	UDP-glycosyltransferase 76E1	1.85795
Cc04_g07570	GSCOC_T00022586001	Uncharacterized protein	1.85519
Cc07_g10470	GSCOC_T00037112001	B-box zinc finger 22	1.85261
Cc01_g10990	GSCOC_T00024215001	Uncharacterized protein	1.85086
Cc01_g12670	GSCOC_T00028209001	Heat shock cognate 70 kDa	1.84142
Cc04_g01540	GSCOC_T00021809001	lipid-transfer DIR1	1.84119
Cc05_g10120	GSCOC_T00021498001	Probable glutathione S-transferase parA	1.8326
Cc02_g12790	GSCOC_T00029236001	S-linalool synthase	1.8321
Cc06_g13220	GSCOC_T00041427001	NADPH--cytochrome P450 reductase	1.82515
Cc03_g01140	GSCOC_T00025718001	Transcription factor MYB12	1.82427
Cc02_g16660	GSCOC_T00014159001	Aquaporin TIP3-2	1.82426
Cc10_g12830	GSCOC_T00032012001	Probable LRR receptor-like serine threonine- kinase At3g47570	1.82293
Cc02_g20030	GSCOC_T00014604001	Phytosulfokines 3	1.81946
Cc00_g33030	GSCOC_T00002213001	Pectinesterase PPME1	1.81782
Cc11_g08990	GSCOC_T00032801001	UDP-glucose flavonoid 3-O-glucosyltransferase 6	1.81245
Cc11_g08440	GSCOC_T00032875001	Uncharacterized protein	1.81199
Cc01_g15410	GSCOC_T00016563001	Root phototropism 2	1.809
Cc01_g20400	GSCOC_T00015938001	Chaperone	1.80797
Cc07_g11600	GSCOC_T00036983001	DETOXIFICATION chloroplastic	1.80569
Cc06_g06570	GSCOC_T00031367001	Digalactosyldiacylglycerol synthase chloroplastic	1.80511
Cc10_g05750	GSCOC_T00034770001	U-box domain-containing 4	1.80391
Cc02_g07510	GSCOC_T00029927001	L-type lectin-domain containing receptor kinase	1.8035
Cc08_g16700	GSCOC_T00035641001	Metal-nicotianamine transporter YSL3	1.80156
Cc10_g06940	GSCOC_T00034593001	UDP-glycosyltransferase 85A2	1.79855
Cc02_g31600	GSCOC_T00027528001	Polyubiquitin-A	1.7983
Cc05_g07230	GSCOC_T00042250001	Probable serine threonine- kinase At1g54610	1.79663
Cc07_g05340	GSCOC_T00039804001	CASP 5C3	1.79616
Cc04_g11350	GSCOC_T00037306001	Manganese-dependent ADP-ribose CDP-alcohol diphosphatase	1.79467
Cc01_g20660	GSCOC_T00015906001	Translocator homolog	1.79407
Cc07_g09180	GSCOC_T00040314001	Scarecrow 15	1.79011
Cc10_g08840	GSCOC_T00034332001	Metallothionein 1	1.78943
Cc04_g11660	GSCOC_T00037368001	Aldehyde dehydrogenase family 2 member C4	1.78757
Cc05_g03500	GSCOC_T00033572001	ASPARTIC PROTEASE IN GUARD CELL 1	1.78738
Cc01_g09820	GSCOC_T00024051001	Uncharacterized protein	1.78459
Cc00_g28430	GSCOC_T00003032001	Inorganic phosphate transporter 1-4	1.78397
Cc04_g00900	GSCOC_T00021718001	kDa class III heat shock	1.78329
Cc06_g13570	GSCOC_T00041379001	Fluoride export 2	1.78312
Cc07_g15530	GSCOC_T00036464001	Inositol-3-phosphate synthase	1.78174
Cc06_g01960	GSCOC_T00023436001	kDa class I heat shock	1.77785
Cc02_g09130	GSCOC_T00029699001	SSXT	1.7776
Cc07_g13770	GSCOC_T00036698001	Uncharacterized protein	1.77679
Cc00_g29160	GSCOC_T00009139001	Uncharacterized protein	1.77502
Cc04_g04350	GSCOC_T00022159001	Blue copper	1.77493
Cc02_g09170	GSCOC_T00029692001	Very-long-chain enoyl- reductase	1.7741
Cc10_g09130	GSCOC_T00034292001	Hydroxysteroid 11-beta-dehydrogenase 1	1.77384
Cc01_g15720	GSCOC_T00016529001	Uncharacterized protein	1.77373
Cc11_g08450	GSCOC_T00032873001	Uncharacterized protein	1.77294
Cc08_g16830	GSCOC_T00035658001	Uncharacterized protein	1.77151
Cc00_g25170	GSCOC_T00012942001	1-aminocyclopropane-1-carboxylate oxidase 4	1.77149
Cc03_g04860	GSCOC_T00026216001	Uncharacterized protein	1.76838
Cc04_g04030	GSCOC_T00022120001	Uncharacterized protein	1.76409
Cc05_g12530	GSCOC_T00021179001	Peroxisomal membrane 2	1.76163
Cc09_g01800	GSCOC_T00017763001	Uncharacterized protein	1.76035
Cc02_g04240	GSCOC_T00020334001	glycerol-3-phosphate transporter 1	1.76005
Cc02_g16670	GSCOC_T00014161001	Uncharacterized protein	1.75935
Cc10_g04750	GSCOC_T00034899001	UDP-glucose flavonoid 3-O-glucosyltransferase 7	1.75863
Cc02_g31770	GSCOC_T00027495001	ADP-ribosylation factor	1.75604
Cc02_g28550	GSCOC_T00009441001	50S ribosomal chloroplastic	1.74775
Cc02_g29500	GSCOC_T00018383001	(-)-germacrene D synthase	1.7455
Cc07_g11720	GSCOC_T00036968001	Catalase isozyme 1	1.74464
Cc01_g13870	GSCOC_T00028369001	Laccase-4	1.74418
Cc11_g10710	GSCOC_T00032543001	Protein CHUP1, chloroplastic	1.742
Cc01_g11710	GSCOC_T00028081001	DDB1- and CUL4-associated factor 8	1.74121
Cc01_g14440	GSCOC_T00028443001	Mitogen-activated kinase kinase kinase A	1.73872
Cc04_g06310	GSCOC_T00022417001	Uncharacterized protein	1.73652
Cc01_g20210	GSCOC_T00015960001	Probable indole-3-pyruvate monooxygenase YUCCA10	1.73412
Cc02_g04250	GSCOC_T00020335001	Heat shock 22 kDa mitochondrial	1.7328
Cc07_g05180	GSCOC_T00039783001	Probable vacuolar amino acid transporter YPQ3	1.72977
Cc08_g04270	GSCOC_T00034246001	Uncharacterized protein At1g51745	1.72902
Cc07_g14620	GSCOC_T00036591001	Uncharacterized protein	1.72564
Cc02_g23880	GSCOC_T00015092001	ABC transporter G family member 11	1.72557
Cc09_g01560	GSCOC_T00017793001	5 -adenylylsulfate reductase chloroplastic	1.72201
Cc05_g11640	GSCOC_T00021288001	UDP-glycosyltransferase 79B9	1.72155
Cc07_g14260	GSCOC_T00036637001	Probable mitochondrial 2-oxoglutarate malate carrier	1.71631
Cc07_g02500	GSCOC_T00039446001	Uncharacterized protein	1.71497
Cc05_g01740	GSCOC_T00015750001	Cytochrome P450 82A3	1.71425
Cc06_g00520	GSCOC_T00023231001	CBL-interacting serine threonine- kinase 14	1.71328
Cc03_g08860	GSCOC_T00033327001	Uncharacterized protein	1.70488
Cc00_g22690	GSCOC_T00011338001	BURP domain RD22	1.70365
Cc02_g26830	GSCOC_T00024988001	Non-specific lipid transfer GPI-anchored 1	1.70304
Cc03_g15900	GSCOC_T00001650001	Chloride channel CLC-e	1.69518
Cc11_g06530	GSCOC_T00020670001	Uncharacterized protein	1.69396
Cc00_g06320	GSCOC_T00008055001	CCAAT enhancer-binding zeta	1.69242
Cc01_g10520	GSCOC_T00024150001	Heavy metal-associated isoprenylated plant 26	1.692
Cc06_g05710	GSCOC_T00043135001	Uncharacterized protein	1.68959
Cc07_g03570	GSCOC_T00039597001	NAC domain-containing 100	1.68548
Cc03_g09440	GSCOC_T00030921001	Glycine-rich	1.68543
Cc08_g08040	GSCOC_T00013079001	Uncharacterized protein	1.68416
Cc03_g15090	GSCOC_T00026766001	UDP-glycosyltransferase 74F2	1.68131
Cc07_g08400	GSCOC_T00040213001	ATP synthase subunit mitochondrial	1.67647
Cc10_g06960	GSCOC_T00034591001	UDP-glycosyltransferase 85A2	1.67563
Cc07_g11710	GSCOC_T00036969001	Catalase isozyme 1	1.67234
Cc08_g08230	GSCOC_T00007245001	Molybdate transporter 2	1.6721
Cc05_g08110	GSCOC_T00016822001	Seed biotin-containing SBP65	1.67021
Cc01_g14360	GSCOC_T00028434001	Probable NADH dehydrogenase	1.66864
Cc08_g11410	GSCOC_T00027142001	Expansin-like B1	1.66846
Cc02_g18020	GSCOC_T00014335001	Plastid division PDV2	1.66812
Cc04_g10090	GSCOC_T00042546001	Uncharacterized protein	1.66767
Cc08_g16970	GSCOC_T00035675001	Granule-bound starch synthase chloroplastic amyloplastic	1.66139
Cc07_g13940	GSCOC_T00036675001	UDP-rhamnose:rhamnosyltransferase 1	1.6603
Cc07_g13630	GSCOC_T00036713001	Rhamnogalacturonate lyase	1.66019
Cc02_g38140	GSCOC_T00027902001	Ascorbate chloroplastic	1.65884
Cc03_g04600	GSCOC_T00026186001	CBL-interacting kinase 7	1.65633
Cc07_g00190	GSCOC_T00019083001	Pectate lyase	1.65179
Cc03_g03370	GSCOC_T00026021001	FANTASTIC FOUR 3	1.65117
Cc07_g13570	GSCOC_T00036720001	Geranylgeranyl pyrophosphate chloroplastic	1.64747
Cc00_g01200	GSCOC_T00019021001	Uncharacterized protein	1.64744
Cc05_g05860	GSCOC_T00035173001	UDP-glucose flavonoid 3-O-glucosyltransferase 6	1.63915
Cc03_g00580	GSCOC_T00025641001	Poly(A) polymerase	1.63905
Cc10_g09080	GSCOC_T00034299001	Uncharacterized protein	1.63806
Cc01_g14330	GSCOC_T00028430001	Omega-3 fatty acid endoplasmic reticulum	1.6369
Cc02_g22030	GSCOC_T00014859001	Auxin-induced 5NG4	1.63689
Cc05_g01470	GSCOC_T00018227001	60S acidic ribosomal P0	1.63463
Cc04_g05860	GSCOC_T00022355001	Ethylene-responsive transcription factor ERF114	1.63014
Cc06_g04430	GSCOC_T00042952001	Uncharacterized protein	1.6299
Cc09_g10490	GSCOC_T00041038001	Lysine histidine transporter-like 7	1.62442
Cc01_g11910	GSCOC_T00028107001	Uncharacterized protein	1.61759
Cc10_g03490	GSCOC_T00024874001	Type IV inositol polyphosphate 5-phosphatase 11	1.61704
Cc00_g29740	GSCOC_T00013761001	Auxin-induced 6B	1.6163
Cc02_g18620	GSCOC_T00014412001	Probable carboxylesterase 2	1.61367
Cc05_g10110	GSCOC_T00021499001	Probable glutathione S-transferase	1.61086
Cc11_g01060	GSCOC_T00019650001	Major allergen Pru ar 1	1.60949
Cc10_g14660	GSCOC_T00033611001	Uncharacterized protein	1.60842
Cc00_g21490	GSCOC_T00004209001	Cysteine-rich receptor kinase 10	1.60628
Cc04_g02940	GSCOC_T00021978001	NRT1 PTR FAMILY	1.60591
Cc06_g18490	GSCOC_T00040465001	GAST1	1.60376
Cc02_g03760	GSCOC_T00020269001	CDGSH iron-sulfur domain-containing 2A	1.60332
Cc00_g01360	GSCOC_T00010937001	Probable indole-3-acetic acid-amido synthetase	1.60231
Cc02_g07890	GSCOC_T00029878001	Actin	1.59616
Cc02_g01840	GSCOC_T00020020001	Bidirectional sugar transporter SWEET3	1.58965
Cc06_g22490	GSCOC_T00012876001	UDP-glucose flavonoid 3-O-glucosyltransferase 6	1.58939
Cc01_g20200	GSCOC_T00015961001	Shikimate dehydrogenase (NADP(+))	1.58745
Cc01_g20880	GSCOC_T00005048001	Magnesium proton exchanger	1.58655
Cc01_g20000	GSCOC_T00015985001	Gibberellin receptor GID1B	1.58584
Cc00_g20030	GSCOC_T00008216001	Uncharacterized protein	1.57952
Cc03_g00700	GSCOC_T00025662001	Calmodulin 4	1.5782
Cc02_g21160	GSCOC_T00014752001	Bifunctional riboflavin biosynthesis RIBA chloroplastic	1.57461
Cc02_g07140	GSCOC_T00009477001	kDa class I heat shock	1.57434
Cc10_g11220	GSCOC_T00018468001	UDP-glycosyltransferase 85A5	1.57391
Cc06_g15980	GSCOC_T00030750001	18 kDa seed maturation	1.57285
Cc06_g14430	GSCOC_T00041257001	glutamine amidotransferase YLR126C	1.56816
Cc05_g06770	GSCOC_T00042189001	Tabersonine 16-hydroxylase 1	1.56559
Cc06_g20620	GSCOC_T00023010001	Homeobox-leucine zipper HAT9	1.56407
Cc02_g12850	GSCOC_T00029229001	Polyphenol chloroplastic	1.56051
Cc07_g07380	GSCOC_T00040087001	AP2-like ethylene-responsive transcription factor ANT	1.56027
Cc04_g11250	GSCOC_T00037294001	Cytochrome P450 71A2	1.55895
Cc07_g01680	GSCOC_T00039343001	F-box LRR-repeat 4	1.55776
Cc01_g17230	GSCOC_T00016350001	Uncharacterized protein	1.55528
Cc08_g00600	GSCOC_T00038492001	Uncharacterized protein	1.55511
Cc04_g15220	GSCOC_T00006570001	MDIS1-interacting receptor like kinase 2	1.55415
Cc08_g10500	GSCOC_T00027018001	Transcription factor MYB1R1	1.55357
Cc02_g13840	GSCOC_T00029089001	homolog subfamily B member 13	1.5529
Cc07_g13170	GSCOC_T00036775001	Potassium channel SKOR	1.5524
Cc11_g14720	GSCOC_T00032019001	Carbonic chloroplastic	1.55084
Cc03_g10580	GSCOC_T00007798001	UDP-glycosyltransferase 73C4	1.54962
Cc08_g00860	GSCOC_T00038456001	Pentatricopeptide repeat-containing At4g21065	1.54889
Cc03_g15190	GSCOC_T00026785001	UDP-glycosyltransferase 74E1	1.5436
Cc05_g09750	GSCOC_T00021544001	Uncharacterized protein	1.54189
Cc02_g01340	GSCOC_T00019954001	phosphatase 2C 57	1.54153
Cc08_g11580	GSCOC_T00027162001	Zeaxanthin chloroplastic	1.54137
Cc08_g15440	GSCOC_T00035473001	Reticulon B1	1.54005
Cc03_g06470	GSCOC_T00026442001	Uncharacterized protein	1.53633
Cc07_g06010	GSCOC_T00039893001	Zeaxanthin chloroplastic	1.53376
Cc07_g19660	GSCOC_T00018531001	Isoflavone 2 -hydroxylase	1.53368
Cc06_g03130	GSCOC_T00023585001	Uncharacterized protein	1.53209
Cc00_g10320	GSCOC_T00008233001	ASPARTIC PROTEASE IN GUARD CELL 1	1.53202
Cc02_g02550	GSCOC_T00020113001	DETOXIFICATION 41	1.53147
Cc01_g14430	GSCOC_T00028442001	Probable phosphatase 2C 25	1.53007
Cc04_g01380	GSCOC_T00021788001	Anthocyanin regulatory C1	1.52963
Cc05_g10160	GSCOC_T00021494001	Probable glutathione S-transferase parC	1.52532
Cc08_g00590	GSCOC_T00038493001	Uncharacterized protein	1.52283
Cc10_g07840	GSCOC_T00034474001	Homeobox-leucine zipper HAT22	1.52004
Cc05_g16190	GSCOC_T00038595001	Transcription factor JUNGBRUNNEN 1	1.51598
Cc06_g17830	GSCOC_T00040374001	Zeatin O-glucosyltransferase	1.51534
Cc04_g14400	GSCOC_T00004345001	LON peptidase N-terminal domain and RING finger 3	1.51183
Cc02_g03030	GSCOC_T00020173001	Transcription factor MYB4	1.51047
Cc02_g04480	GSCOC_T00020364001	8-amino-7-oxononanoate synthase	1.50977
Cc06_g16540	GSCOC_T00030674001	Carboxyl-terminal-processing protease	1.50905
Cc04_g16990	GSCOC_T00035821001	Pectinesterase 1	1.50854
Cc10_g06420	GSCOC_T00034661001	Uncharacterized protein	1.50738
Cc02_g19720	GSCOC_T00014546001	LOB domain-containing 39	1.50347
Cc03_g10660	GSCOC_T00000379001	Vacuolar amino acid transporter 1	1.5032
Cc02_g05560	GSCOC_T00039068001	CBL-interacting kinase 2	1.50279
Cc07_g03900	GSCOC_T00039638001	Uncharacterized protein	1.5009
Cc10_g03670	GSCOC_T00024900001	B3 domain-containing REM16	1.49784
Cc02_g21500	GSCOC_T00014792001	Uncharacterized protein	1.4969
Cc07_g16120	GSCOC_T00037606001	Uncharacterized protein	1.49551
Cc07_g04510	GSCOC_T00039707001	Olee1	1.49483
Cc00_g32800	GSCOC_T00001453001	Uncharacterized protein	1.49194
Cc07_g14110	GSCOC_T00036655001	Mechanosensitive ion channel chloroplastic	1.49187
Cc08_g00870	GSCOC_T00038455001	AFG1-like ATPase	1.49106
Cc07_g05650	GSCOC_T00039843001	Dof zinc finger	1.48784
Cc03_g04300	GSCOC_T00026140001	Early light-induced chloroplastic	1.48528
Cc07_g07390	GSCOC_T00040088001	AP2-like ethylene-responsive transcription factor ANT	1.48491
Cc11_g08590	GSCOC_T00032851001	Mitogen-activated kinase 12	1.48108
Cc05_g05980	GSCOC_T00035195001	Malonyl-coenzyme A:anthocyanin 3-O-glucoside-6 -O-malonyltransferase	1.48031
Cc01_g19400	GSCOC_T00016062001	Ent-copalyl diphosphate chloroplastic	1.47807
Cc06_g07880	GSCOC_T00031201001	Defensin P322	1.47795
Cc00_g14230	GSCOC_T00005205001	argonaute 4	1.47644
Cc06_g11380	GSCOC_T00041666001	GATA transcription factor 22	1.47496
Cc02_g24580	GSCOC_T00028866001	Probable plastid-lipid-associated chloroplastic	1.47294
Cc06_g09080	GSCOC_T00041968001	Heme-binding chloroplastic	1.47098
Cc02_g30100	GSCOC_T00038963001	Cytokinin dehydrogenase 9	1.47061
Cc11_g11030	GSCOC_T00032492001	Uncharacterized RING finger	1.46911
Cc11_g04190	GSCOC_T00001330001	polyol transporter 2	1.46839
Cc02_g35340	GSCOC_T00042863001	Uncharacterized protein R707	1.46829
Cc02_g05880	GSCOC_T00039108001	Uncharacterized protein	1.46789
Cc07_g07030	GSCOC_T00040036001	Calcium-transporting ATPase plasma membrane-type	1.46409
Cc01_g09650	GSCOC_T00024028001	Flavanone 7-O-glucoside 2 -O-beta-L-rhamnosyltransferase	1.46396
Cc01_g11110	GSCOC_T00024229001	Aquaporin PIP2-2	1.46036
Cc11_g10880	GSCOC_T00032517001	Uncharacterized protein	1.45757
Cc11_g14710	GSCOC_T00032021001	Uncharacterized protein	1.45737
Cc09_g05270	GSCOC_T00007105001	Allantoate deiminase	1.45615
Cc02_g12890	GSCOC_T00029224001	Dof zinc finger	1.45357
Cc00_g11670	GSCOC_T00004164001	Pathogenesis-related P2	1.45163
Cc05_g04270	GSCOC_T00031641001	Uncharacterized protein	1.44564
Cc00_g22520	GSCOC_T00000523001	Probable indole-3-acetic acid-amido synthetase	1.44563
Cc02_g18920	GSCOC_T00014452001	PI-PLC X domain-containing At5g67130	1.44414
Cc07_g13990	GSCOC_T00036669001	Receptor-like cytosolic serine threonine- kinase RBK1	1.44391
Cc02_g37110	GSCOC_T00028036001	SPX domain-containing membrane At4g22990	1.43776
Cc10_g04770	GSCOC_T00034895001	Chromosome-associated kinesin KIF4A	1.43669
Cc02_g23000	GSCOC_T00014979001	NifU-like protein 2, chloroplastic	1.43664
Cc01_g19020	GSCOC_T00016112001	Heat stress transcription factor A-6b	1.43283
Cc00_g08990	GSCOC_T00001066001	Uncharacterized protein	1.43149
Cc00_g10980	GSCOC_T00000136001	Secologanin synthase	1.43002
Cc01_g05790	GSCOC_T00027397001	Serine--glyoxylate aminotransferase	1.42994
Cc10_g00420	GSCOC_T00024492001	Serine threonine- kinase endoribonuclease ire-1	1.4292
Cc05_g14670	GSCOC_T00038792001	Uncharacterized protein	1.42847
Cc07_g05330	GSCOC_T00039803001	Uncharacterized protein	1.42739
Cc01_g10280	GSCOC_T00024113001	Superoxide dismutas	1.42624
Cc00_g26180	GSCOC_T00006051001	Bifunctional 15-cis-phytoene chromoplastic	1.42542
Cc11_g07660	GSCOC_T00018021001	late blight resistance homolog R1B-17	1.42344
Cc08_g13330	GSCOC_T00030356001	Probable LRR receptor-like serine threonine- kinase At3g47570	1.42269
Cc02_g01380	GSCOC_T00019960001	Bifunctional epoxide hydrolase 2	1.41989
Cc11_g07020	GSCOC_T00018117001	1-aminocyclopropane-1-carboxylate oxidase homolog 11	1.41921
Cc00_g06370	GSCOC_T00004112001	Premnaspirodiene oxygenase	1.4183
Cc06_g08470	GSCOC_T00031127001	Heme oxygenase chloroplastic	1.41763
Cc08_g06340	GSCOC_T00040948001	Uncharacterized protein At1g3222	1.41596
Cc04_g03240	GSCOC_T00022017001	Mitochondrial basic amino acids transporter	1.41573
Cc07_g12240	GSCOC_T00036903001	Uncharacterized protein	1.41499
Cc10_g02850	GSCOC_T00024794001	S-adenosyl-L-methionine-dependent methyltransferase Franean1_4929	1.4149
Cc08_g10200	GSCOC_T00026981001	Probable LRR receptor-like serine threonine- kinase At3g47570	1.41433
Cc05_g11710	GSCOC_T00021280001	Probable aminotransferase TAT2	1.41424
Cc09_g10610	GSCOC_T00041024001	Glycerol-3-phosphate acyltransferase 3	1.41411
Cc02_g13290	GSCOC_T00029175001	E3 ubiquitin- ligase RMA1H1	1.41383
Cc02_g12320	GSCOC_T00029299001	MOTHER of FT and TFL1	1.41382
Cc07_g06770	GSCOC_T00040001001	Uncharacterized protein ycf36	1.41322
Cc00_g09230	GSCOC_T00012305001	Serine threonine- kinase Aurora-1	1.41171
Cc03_g02680	GSCOC_T00025932001	Uncharacterized protein	1.41108
Cc05_g00760	GSCOC_T00013166001	Acidic endochitinase	1.40417
Cc06_g08240	GSCOC_T00031156001	Stellacyanin	1.40306
Cc02_g33810	GSCOC_T00013095001	Probable linoleate 9S-lipoxygenase 5	1.40259
Cc02_g00910	GSCOC_T00019892001	Small heat shock chloroplastic	1.39932
Cc02_g13000	GSCOC_T00029212001	NADPH:quinone oxidoreductase	1.3977
Cc08_g10360	GSCOC_T00027000001	Probable phosphatase 2C 33	1.39766
Cc03_g00120	GSCOC_T00025588001	CBL-interacting serine threonine- kinase 1	1.39755
Cc11_g06760	GSCOC_T00020702001	Leucine-rich repeat receptor kinase PXL1	1.39718
Cc08_g02890	GSCOC_T00037790001	Uncharacterized protein	1.39532
Cc00_g32010	GSCOC_T00012890001	Thioredoxin H2	1.39287
Cc00_g30840	GSCOC_T00006253001	NAC transcription factor 29	1.39023
Cc03_g12310	GSCOC_T00015237001	Uncharacterized protein	1.38884
Cc11_g09730	GSCOC_T00032680001	LEAF RUST 10 DISEASE-RESISTANCE LOCUS RECEPTOR-LIKE PROTEIN KINASE-like	1.38795
Cc09_g05280	GSCOC_T00007106001	Allantoate deiminase	1.38689
Cc00_g02310	GSCOC_T00007937001	Probable receptor kinase At5g39030	1.38617
Cc04_g07960	GSCOC_T00022637001	LRR receptor-like serine threonine- kinase GSO2	1.38432
Cc06_g09540	GSCOC_T00041900001	Multi -bridging factor 1c	1.38089
Cc06_g19620	GSCOC_T00029030001	F-box At2g32560	1.38031
Cc10_g13230	GSCOC_T00035324001	F-box SKP2A	1.3762
Cc07_g20410	GSCOC_T00015692001	Receptor 12	1.37514
Cc05_g09380	GSCOC_T00021594001	Xyloglucan endotransglucosylase hydrolase 2	1.37457
Cc00_g20040	GSCOC_T00008217001	Uncharacterized protein	1.37168
Cc04_g02420	GSCOC_T00021913001	Protein CHUP1, chloroplastic	1.3715
Cc08_g06040	GSCOC_T00024418001	Long-chain-alcohol oxidase FAO4A	1.36978
Cc07_g10920	GSCOC_T00037058001	Rhodanese-like domain-containing 17	1.3695
Cc02_g02640	GSCOC_T00020125001	Short-chain dehydrogenase TIC chloroplastic	1.36869
Cc03_g04770	GSCOC_T00026205001	Magnesium transporter MRS2-2	1.36833
Cc02_g33800	GSCOC_T00013093001	Probable linoleate 9S-lipoxygenase 5	1.36422
Cc05_g10150	GSCOC_T00021495001	Probable glutathione S-transferase	1.36354
Cc05_g03560	GSCOC_T00033582001	Cysteine-rich receptor kinase 25	1.36269
Cc02_g04560	GSCOC_T00020373001	Hexose carrier HEX6	1.3625
Cc06_g12660	GSCOC_T00041509001	Embryogenesis-associated EMB8	1.36147
Cc00_g26190	GSCOC_T00008978001	Probable LRR receptor-like serine threonine- kinase At3g47570	1.36091
Cc00_g08820	GSCOC_T00011514001	disease resistance RGA3	1.35981
Cc07_g03420	GSCOC_T00039571001	Vacuolar amino acid transporter 1	1.35703
Cc05_g07720	GSCOC_T00016771001	homolog subfamily B member 13	1.35619
Cc05_g02900	GSCOC_T00020864001	1-aminocyclopropane-1-carboxylate oxidase 3	1.35597
Cc02_g20780	GSCOC_T00014697001	glutamine amidotransferase YLR126C	1.35295
Cc02_g12020	GSCOC_T00029340001	Receptor-like serine threonine- kinase SD1-8	1.35289
Cc10_g05360	GSCOC_T00034818001	Isoflavone 2 -hydroxylase	1.35188
Cc10_g11940	GSCOC_T00031873001	Uncharacterized protein	1.35052
Cc03_g07480	GSCOC_T00026600001	F-box At2g02240	1.34933
Cc11_g09750	GSCOC_T00032676001	LEAF RUST 10 DISEASE-RESISTANCE LOCUS RECEPTOR-LIKE PROTEIN KINASE-like	1.34623
Cc02_g18860	GSCOC_T00014443001	ABSCISIC ACID-INSENSITIVE 5 6	1.34545
Cc06_g17950	GSCOC_T00040390001	Uncharacterized protein	1.34426
Cc05_g14140	GSCOC_T00038857001	GDP-L-galactose phosphorylase 1	1.34368
Cc09_g00800	GSCOC_T00017903001	Tonoplast dicarboxylate transporter	1.3433
Cc04_g16400	GSCOC_T00035735001	(-)-germacrene D synthase	1.34328
Cc02_g34510	GSCOC_T00000700001	Phospholipase D zeta 1	1.34014
Cc02_g13920	GSCOC_T00029079001	GDSL esterase lipase At1g28590	1.33934
Cc06_g17840	GSCOC_T00040375001	Zeatin O-glucosyltransferase	1.33487
Cc01_g14600	GSCOC_T00028466001	Pentatricopeptide repeat-containing chloroplastic	1.33127
Cc03_g07690	GSCOC_T00026629001	Uncharacterized protein	1.32925
Cc03_g15880	GSCOC_T00001648001	BTB POZ domain-containing At5g03250	1.32895
Cc09_g01780	GSCOC_T00017765001	DETOXIFICATION 41	1.32883
Cc00_g05460	GSCOC_T00000304001	Pathogenesis-related 5	1.32722
Cc00_g29590	GSCOC_T00006885001	Disease resistance RFL1	1.32468
Cc11_g12260	GSCOC_T00032341001	Probable inactive purple acid phosphatase 2	1.32203
Cc05_g14600	GSCOC_T00038799001	NLR family CARD domain-containing 3	1.32153
Cc07_g08780	GSCOC_T00040267001	Probable mannose-6-phosphate isomerase	1.31993
Cc02_g38150	GSCOC_T00027901001	Cytochrome P450 86A2	1.31928
Cc06_g01240	GSCOC_T00023337001	Trihelix transcription factor GT-3b	1.31818
Cc01_g21020	GSCOC_T00005031001	Bifunctional epoxide hydrolase 2	1.31746
Cc02_g03350	GSCOC_T00020216001	F-box PP2-A13	1.31729
Cc11_g12250	GSCOC_T00032342001	Probable inactive purple acid phosphatase 2	1.31619
Cc10_g01010	GSCOC_T00024564001	High mobility group B 15	1.31419
Cc08_g07420	GSCOC_T00025370001	Santalene and bergamotene chloroplastic	1.31331
Cc00_g29360	GSCOC_T00010479001	Reticuline oxidase	1.31096
Cc08_g15850	GSCOC_T00035529001	Uncharacterized protein	1.31031
Cc01_g15360	GSCOC_T00016571001	Trans-cinnamate 4-monooxygenase	1.30968
Cc05_g05700	GSCOC_T00035146001	Uncharacterized protein	1.30958
Cc10_g13470	GSCOC_T00035288001	Subtilisin-like protease	1.30734
Cc01_g16920	GSCOC_T00016386001	Uncharacterized protein	1.3067
Cc10_g05650	GSCOC_T00034783001	Zinc finger ZAT10	1.30594
Cc08_g13890	GSCOC_T00030291001	SPX domain-containing membrane At4g22990	1.3049
Cc07_g02240	GSCOC_T00039408001	CASP 4A3	1.30456
Cc10_g13330	GSCOC_T00035311001	Uncharacterized acetyltransferase At3g50280	1.30368
Cc11_g05430	GSCOC_T00020499001	Receptor 12	1.30214
Cc07_g10720	GSCOC_T00037082001	Uncharacterized protein	1.30211
Cc05_g05680	GSCOC_T00035143001	Frataxin, mitochondrial	1.29986
Cc10_g13350	GSCOC_T00035308001	Uncharacterized protein	1.29878
Cc04_g02470	GSCOC_T00021919001	Uncharacterized protein	1.29837
Cc00_g01220	GSCOC_T00019024001	Uncharacterized protein	1.29664
Cc02_g11560	GSCOC_T00029397001	Homeobox-leucine zipper MERISTEM L1	1.29572
Cc01_g18920	GSCOC_T00016132001	Uncharacterized protein	1.29451
Cc07_g00800	GSCOC_T00019160001	Uncharacterized protein	1.29343
Cc05_g02920	GSCOC_T00033458001	1-aminocyclopropane-1-carboxylate oxidase 4	1.29204
Cc06_g04760	GSCOC_T00042998001	RING-H2 finger ATL52	1.29192
Cc06_g18940	GSCOC_T00028933001	STRICTOSIDINE SYNTHASE-LIKE 12	1.29143
Cc04_g03500	GSCOC_T00022045001	Probable sulfate transporter	1.29046
Cc03_g12520	GSCOC_T00015208001	NLP8	1.29038
Cc11_g14370	GSCOC_T00032066001	MLP 423	1.29038
Cc07_g05600	GSCOC_T00039837001	(S)-hydroxynitrile lyase	1.2879
Cc04_g01480	GSCOC_T00021802001	Nuclear transcription factor Y subunit A-3	1.28681
Cc00_g35010	GSCOC_T00007415001	Uncharacterized protein	1.28644
Cc08_g11210	GSCOC_T00027117001	Uncharacterized protein	1.28454
Cc01_g15030	GSCOC_T00016613001	Alanine--glyoxylate aminotransferase 2 homolog mitochondrial	1.28362
Cc11_g08370	GSCOC_T00032885001	MLP 31	1.28325
Cc05_g06720	GSCOC_T00042178001	Peroxisomal membrane 2	1.28288
Cc00_g27580	GSCOC_T00003716001	Ubiquitin-60S ribosomal L40	1.28148
Cc11_g04220	GSCOC_T00001335001	polyol transporter 2	1.27864
Cc01_g06330	GSCOC_T00030001001	Hydroxymethylglutaryl- mitochondrial	1.27724
Cc00_g10050	GSCOC_T00003814001	Trans-cinnamate 4-monooxygenase	1.277
Cc00_g30050	GSCOC_T00012869001	LRR receptor-like serine threonine- kinase FLS2	1.27189
Cc00_g16400	GSCOC_T00011388001	(+)-neomenthol dehydrogenase	1.27168
Cc03_g09580	GSCOC_T00030941001	Probably inactive leucine-rich repeat receptor kinase At5g48380	1.27159
Cc08_g08910	GSCOC_T00017228001	BURP domain-containing 3	1.27126
Cc06_g02510	GSCOC_T00023508001	Uncharacterized protein C24B11.05	1.2664
Cc00_g25030	GSCOC_T00008820001	Cell division control 2 homolog C	1.2662
Cc10_g00850	GSCOC_T00024545001	Lysine histidine transporter-like 7	1.2661
Cc05_g02890	GSCOC_T00020866001	1-aminocyclopropane-1-carboxylate oxidase 1	1.26518
Cc06_g14280	GSCOC_T00041277001	S-adenosylmethionine decarboxylase proenzyme	1.26459
Cc04_g16350	GSCOC_T00035725001	Valencene synthase	1.26437
Cc07_g18490	GSCOC_T00018745001	Isoflavone 2 -hydroxylase	1.26369
Cc07_g02200	GSCOC_T00039403001	GDSL esterase lipase At5g14450	1.26352
Cc06_g05540	GSCOC_T00043108001	Cytochrome P450 94A1	1.2633
Cc01_g15690	GSCOC_T00016533001	oxidoreductase GLYR1	1.26189
Cc00_g34610	GSCOC_T00013454001	Glyoxylate reductase	1.26061
Cc10_g02310	GSCOC_T00024732001	Lon protease 2	1.26035
Cc07_g16310	GSCOC_T00037577001	ABC transporter F family member 5	1.26021
Cc00_g06800	GSCOC_T00007409001	Fasciclin-like arabinogalactan 1	1.2599
Cc02_g30120	GSCOC_T00038966001	IQ-DOMAIN 14	1.25945
Cc01_g14540	GSCOC_T00028456001	N-alpha-acetyltransferase 20	1.25764
Cc11_g13710	GSCOC_T00032148001	Glutathione S-transferase U17	1.25705
Cc03_g10100	GSCOC_T00031012001	Major allergen Pru ar 1	1.25648
Cc02_g24440	GSCOC_T00028885001	SPX domain-containing 3	1.25607
Cc02_g10990	GSCOC_T00029468001	Ras-related RABF1	1.25278
Cc05_g16100	GSCOC_T00038605001	RING finger B	1.24949
Cc01_g03960	GSCOC_T00040880001	G-type lectin S-receptor-like serine threonine- kinase RLK1	1.24774
Cc01_g09290	GSCOC_T00023979001	TGACG-sequence-specific DNA-binding TGA-	1.24664
Cc05_g04890	GSCOC_T00035027001	Glucose-6-phosphate phosphate translocator chloroplastic	1.24568
Cc02_g28520	GSCOC_T00009438001	Ferredoxin--nitrite chloroplastic	1.24507
Cc00_g26520	GSCOC_T00008501001	Uncharacterized protein	1.24467
Cc05_g13040	GSCOC_T00021111001	Uncharacterized protein	1.24367
Cc08_g00620	GSCOC_T00038490001	G-type lectin S-receptor-like serine threonine- kinase SD2-5	1.24362
Cc11_g14050	GSCOC_T00032110001	Two-component response regulator ARR4	1.24239
Cc10_g09650	GSCOC_T00031516001	Cytochrome P450 716B2	1.23928
Cc03_g05200	GSCOC_T00026268001	1-aminocyclopropane-1-carboxylate oxidase homolog 3	1.23834
Cc04_g02710	GSCOC_T00021949001	CASP 3A1	1.23796
Cc02_g21430	GSCOC_T00014784001	Uncharacterized protein	1.23627
Cc05_g02850	GSCOC_T00020872001	Glucan endo-	1.23546
Cc02_g03890	GSCOC_T00020290001	65-kDa microtubule-associated 3	1.23422
Cc07_g10860	GSCOC_T00037064001	Pathogenesis-related 5	1.23218
Cc08_g02880	GSCOC_T00037789001	Uncharacterized protein	1.23132
Cc06_g13690	GSCOC_T00041358001	Zinc finger CONSTANS-LIKE 4	1.23019
Cc05_g08550	GSCOC_T00016879001	Uncharacterized protein	1.22941
Cc06_g07790	GSCOC_T00031214001	Monogalactosyldiacylglycerol synthase chloroplastic	1.22844
Cc05_g05970	GSCOC_T00035185001	Malonyl-coenzyme A:anthocyanin 3-O-glucoside-6 -O-malonyltransferase	1.22628
Cc01_g08330	GSCOC_T00015536001	Receptor 12	1.22601
Cc00_g11210	GSCOC_T00010562001	MDIS1-interacting receptor like kinase 2	1.22591
Cc06_g00940	GSCOC_T00023299001	Nodulation-signaling pathway 2	1.22531
Cc11_g05250	GSCOC_T00020469001	Probable potassium transporter 17	1.2244
Cc11_g12170	GSCOC_T00032353001	Beta-glucosidase 40	1.22275
Cc02_g38270	GSCOC_T00027885001	E3 ubiquitin- ligase At3g02290	1.22192
Cc10_g04200	GSCOC_T00034965001	WEAK CHLOROPLAST MOVEMENT UNDER BLUE LIGHT 1	1.22137
Cc11_g12480	GSCOC_T00032312001	Probable WRKY transcription factor 20	1.22043
Cc11_g06850	GSCOC_T00020715001	Receptor 12	1.21949
Cc06_g16770	GSCOC_T00004128001	Thiol protease SEN102	1.21661
Cc00_g28320	GSCOC_T00009751001	Receptor 12	1.21642
Cc10_g13870	GSCOC_T00035226001	Probable LRR receptor-like serine threonine- kinase At2g16250	1.21443
Cc06_g08750	GSCOC_T00031090001	Uncharacterized protein At1g15400	1.21316
Cc10_g05460	GSCOC_T00034803001	Snakin-1	1.21025
Cc03_g14440	GSCOC_T00026661001	Uncharacterized protein	1.20858
Cc02_g18930	GSCOC_T00014453001	U-box domain-containing 25	1.20787
Cc03_g08410	GSCOC_T00033258001	Omega-hydroxypalmitate O-feruloyl transferase	1.20754
Cc04_g09060	GSCOC_T00022783001	LURP-one-related 8	1.20735
Cc02_g10760	GSCOC_T00029494001	Uncharacterized protein	1.20612
Cc02_g04890	GSCOC_T00020419001	Uncharacterized protein	1.20525
Cc02_g20400	GSCOC_T00014653001	Malate glyoxysomal	1.20348
Cc11_g09790	GSCOC_T00032670001	Probable receptor kinase At5g39030	1.20225
Cc01_g19860	GSCOC_T00016003001	Uncharacterized protein	1.20163
Cc09_g01000	GSCOC_T00017872001	Uncharacterized protein	1.20143
Cc06_g18150	GSCOC_T00040419001	Bifunctional monodehydroascorbate reductase and carbonic anhydrase nectarin-3	1.20086
Cc05_g15430	GSCOC_T00038693001	Fructose-bisphosphate cytoplasmic isozyme 1	1.20086
Cc02_g38620	GSCOC_T00027839001	Desiccation protectant Lea14 homolog	1.19969
Cc05_g01810	GSCOC_T00015766001	1-aminocyclopropane-1-carboxylate oxidase homolog 1	1.19927
Cc06_g12920	GSCOC_T00041475001	RING-H2 finger ATL43	1.19899
Cc01_g12510	GSCOC_T00028188001	Bifunctional uridylyltransferase uridylyl-removing enzyme	1.19793
Cc07_g03890	GSCOC_T00039637001	Uncharacterized protein	1.1971
Cc09_g08190	GSCOC_T00020757001	UDP-glycosyltransferase 85A2	1.19458
Cc10_g05710	GSCOC_T00034776001	Interferon-related developmental regulator 1	1.19283
Cc02_g37000	GSCOC_T00028048001	MADS-box SOC1	1.1922
Cc07_g06990	GSCOC_T00040031001	Formin 6	1.19219
Cc10_g01130	GSCOC_T00024579001	Uncharacterized protein	1.19
Cc01_g20810	GSCOC_T00005056001	Uncharacterized protein	1.18954
Cc10_g02520	GSCOC_T00024756001	Sec14 cytosolic factor	1.18931
Cc07_g04840	GSCOC_T00039745001	S-adenosylmethionine decarboxylase proenzyme	1.18829
Cc03_g09470	GSCOC_T00030925001	Uncharacterized protein	1.18533
Cc02_g26550	GSCOC_T00024952001	PHLOEM PROTEIN 2-LIKE A1	1.18463
Cc06_g11350	GSCOC_T00041669001	Uncharacterized protein	1.18326
Cc00_g22120	GSCOC_T00009092001	MLP 43	1.18287
Cc06_g04220	GSCOC_T00023731001	Acylphosphatase	1.18167
Cc07_g02030	GSCOC_T00039382001	Monodehydroascorbate reductase peroxisomal	1.18083
Cc07_g14950	GSCOC_T00036549001	UDP-glycosyltransferase 85A3	1.17884
Cc02_g07320	GSCOC_T00029955001	Probable glycosyltransferase At5g20260	1.17879
Cc10_g01850	GSCOC_T00024674001	ATP sulfurylase 2	1.17847
Cc06_g15300	GSCOC_T00030848001	Outer membrane lipo Blc	1.17841
Cc02_g31540	GSCOC_T00027542001	Polyubiquitin 10	1.17708
Cc01_g05740	GSCOC_T00027391001	F-box LRR-repeat At4g14096	1.17563
Cc10_g02080	GSCOC_T00024704001	Uncharacterized protein	1.17554
Cc06_g10850	GSCOC_T00041727001	Zinc finger CCCH domain-containing 20	1.17545
Cc07_g17950	GSCOC_T00018823001	Serine threonine- phosphatase 6 regulatory ankyrin repeat subunit C	1.1744
Cc04_g00880	GSCOC_T00021715001	Polyphosphoinositide phosphatase	1.17415
Cc04_g03920	GSCOC_T00022107001	Dehydrogenase reductase SDR family member 4	1.17373
Cc06_g23460	GSCOC_T00040566001	Light-mediated development DET1	1.17362
Cc06_g16680	GSCOC_T00030651001	polyol transporter 2	1.17243
Cc11_g14390	GSCOC_T00032064001	Auxin-induced 5NG4	1.16991
Cc07_g12710	GSCOC_T00036841001	Benzoate-- peroxisomal	1.16962
Cc03_g07350	GSCOC_T00026584001	Ankyrin repeat domain-containing 13B	1.16938
Cc02_g04050	GSCOC_T00020308001	Blue-light photoreceptor PHR2	1.16792
Cc02_g20060	GSCOC_T00014607001	Uncharacterized protein	1.16696
Cc05_g00110	GSCOC_T00017031001	Uncharacterized protein	1.16669
Cc09_g06090	GSCOC_T00033364001	LRR receptor-like serine threonine- kinase EFR	1.16645
Cc02_g02350	GSCOC_T00020088001	Heat shock 83	1.16523
Cc05_g08950	GSCOC_T00016936001	G-type lectin S-receptor-like serine threonine- kinase SD2-5	1.16419
Cc11_g11130	GSCOC_T00032482001	S-adenosylmethionine decarboxylase proenzyme	1.16377
Cc01_g17060	GSCOC_T00016367001	Cyclin-dependent kinase inhibitor 3	1.16344
Cc08_g13880	GSCOC_T00030292001	HOTHEAD	1.16305
Cc03_g09310	GSCOC_T00042686001	UDP-glycosyltransferase 75D1	1.16271
Cc11_g10260	GSCOC_T00032600001	Pleckstrin homology domain-containing family A member 8	1.15961
Cc02_g02070	GSCOC_T00020051001	Acidic endochitinase SE2	1.15958
Cc08_g11940	GSCOC_T00030552001	Nudix hydrolase 8	1.15773
Cc06_g05120	GSCOC_T00043045001	Glucomannan 4-beta-mannosyltransferase 9	1.15577
Cc11_g16260	GSCOC_T00038162001	Very-long-chain 3-oxoacyl- reductase	1.15515
Cc01_g14260	GSCOC_T00028422001	Probable pyridoxal 5 -phosphate synthase subunit PDX1	1.1545
Cc00_g22310	GSCOC_T00013343001	Squalene synthase	1.15313
Cc08_g17060	GSCOC_T00035686001	Heavy metal-associated isoprenylated plant 26	1.15306
Cc02_g36740	GSCOC_T00003885001	Glutathione S-transferase zeta class	1.1513
Cc08_g10660	GSCOC_T00027038001	Uncharacterized protein	1.15006
Cc02_g06610	GSCOC_T00039203001	Uncharacterized protein	1.14901
Cc02_g24540	GSCOC_T00028871001	Squamosa promoter-binding 8	1.1485
Cc01_g11900	GSCOC_T00028106001	Probable serine threonine- kinase PBL5	1.14716
Cc02_g06240	GSCOC_T00039150001	RING-H2 finger ATL2	1.14502
Cc11_g07760	GSCOC_T00018008001	CRAL-TRIO domain-containing YKL091C	1.14335
Cc10_g15880	GSCOC_T00033790001	Chromosome-associated kinesin KIF4	1.14056
Cc10_g11650	GSCOC_T00001439001	late blight resistance homolog R1B-14	1.13951
Cc01_g14820	GSCOC_T00028495001	Shewanella phosphatase 2	1.13874
Cc03_g04100	GSCOC_T00026117001	Homocysteine S-methyltransferase 2	1.13611
Cc08_g14180	GSCOC_T00030257001	Heat stress transcription factor B-2c	1.13588
Cc06_g15110	GSCOC_T00030879001	Monodehydroascorbate reductase peroxisomal	1.13588
Cc11_g11120	GSCOC_T00032483001	Uncharacterized protein	1.13465
Cc03_g13420	GSCOC_T00018964001	Uncharacterized protein	1.13326
Cc02_g27320	GSCOC_T00025059001	Siroheme synthase	1.1329
Cc02_g18570	GSCOC_T00014405001	Uncharacterized protein	1.13239
Cc01_g05440	GSCOC_T00027334001	Esterase PIR7B	1.13205
Cc02_g39080	GSCOC_T00027767001	Uncharacterized protein	1.13073
Cc03_g05320	GSCOC_T00026281001	1-aminocyclopropane-1-carboxylate oxidase homolog 1	1.13065
Cc10_g02260	GSCOC_T00024725001	Purple acid phosphatase	1.1284
Cc06_g00580	GSCOC_T00023241001	Transcription factor SCREAM2	1.12796
Cc10_g05400	GSCOC_T00034809001	Isoflavone 2 -hydroxylase	1.12709
Cc11_g15210	GSCOC_T00038027001	Uncharacterized protein	1.12708
Cc07_g15490	GSCOC_T00036469001	G-type lectin S-receptor-like serine threonine- kinase RLK1	1.1256
Cc05_g09700	GSCOC_T00021549001	Uncharacterized protein	1.12307
Cc05_g02820	GSCOC_T00020879001	E3 ubiquitin- ligase COP1	1.12275
Cc03_g09680	GSCOC_T00030954001	30S ribosomal chloroplastic	1.12255
Cc07_g11980	GSCOC_T00036934001	Glutamate receptor	1.12074
Cc01_g05840	GSCOC_T00027410001	Bidirectional sugar transporter SWEET3b	1.12063
Cc02_g20390	GSCOC_T00014652001	Receptor kinase HAIKU2	1.11689
Cc06_g14920	GSCOC_T00030903001	Gibberellin 2-beta-dioxygenase 8	1.11672
Cc00_g04190	GSCOC_T00006614001	60S ribosomal L10-2	1.11348
Cc07_g17960	GSCOC_T00018822001	Ankyrin repeat-containing ITN1	1.1122
Cc02_g39110	GSCOC_T00027762001	Dihydroflavonol 4-reductase	1.11197
Cc08_g14700	GSCOC_T00030192001	Uncharacterized protein HI_0488	1.11095
Cc00_g13690	GSCOC_T00009570001	Probable aldo-keto reductase 2	1.10958
Cc06_g06930	GSCOC_T00031324001	Uncharacterized protein	1.10955
Cc02_g22740	GSCOC_T00014952001	Uncharacterized protein	1.10926
Cc06_g12130	GSCOC_T00041573001	Uncharacterized protein	1.10739
Cc04_g01310	GSCOC_T00021774001	Uncharacterized protein Mb2734	1.10691
Cc02_g03610	GSCOC_T00020249001	chloroplastic	1.1047
Cc05_g00200	GSCOC_T00017045001	B-box zinc finger 24	1.10316
Cc07_g04850	GSCOC_T00039746001	Uncharacterized protein	1.10215
Cc02_g06570	GSCOC_T00039198001	Cytochrome P450 89A2	1.10081
Cc01_g01450	GSCOC_T00037907001	UDP-glycosyltransferase 74F2	1.10076
Cc04_g16510	GSCOC_T00035756001	Cyclic dof factor 3	1.10071
Cc10_g02100	GSCOC_T00024707001	Uncharacterized TPR repeat-containing At1g05150	1.09951
Cc01_g15230	GSCOC_T00016588001	Probable serine threonine- kinase WNK4	1.09857
Cc10_g01200	GSCOC_T00024587001	Probable nucleoredoxin 2	1.09681
Cc03_g05980	GSCOC_T00026372001	Probable fatty acid methyltransferase	1.09477
Cc07_g00220	GSCOC_T00019087001	Pentatricopeptide repeat-containing At5g39710	1.09472
Cc11_g06520	GSCOC_T00020669001	LRR receptor-like serine threonine- kinase ERL1	1.09453
Cc05_g08910	GSCOC_T00016930001	late blight resistance homolog R1B-14	1.0931
Cc09_g02340	GSCOC_T00017689001	Adenylate kinase	1.09286
Cc02_g09330	GSCOC_T00029668001	Uncharacterized protein	1.08748
Cc06_g12540	GSCOC_T00041525001	Auxin response factor 19	1.08706
Cc11_g11080	GSCOC_T00032487001	Uncharacterized protein	1.08697
Cc11_g07420	GSCOC_T00018055001	Receptor 12	1.08663
Cc08_g03280	GSCOC_T00010791001	Probable transcription factor KAN2	1.08583
Cc02_g13340	GSCOC_T00029170001	Phosphoserine phosphatase 1	1.08502
Cc02_g10260	GSCOC_T00029547001	OTU domain-containing At3g57810	1.08221
Cc11_g02870	GSCOC_T00025518001	Pentatricopeptide repeat-containing chloroplastic	1.08099
Cc11_g17070	GSCOC_T00038263001	Uncharacterized protein	1.07957
Cc06_g09210	GSCOC_T00041944001	ABC transporter G family member 32	1.07784
Cc07_g17560	GSCOC_T00008839001	Auxin-induced 5NG4	1.07637
Cc04_g04230	GSCOC_T00022145001	Uncharacterized protein	1.07479
Cc07_g04900	GSCOC_T00039751001	Uncharacterized protein	1.07422
Cc00_g11830	GSCOC_T00007748001	Uncharacterized protein	1.07208
Cc11_g11290	GSCOC_T00032465001	Ocs element-binding factor 1	1.07147
Cc06_g15890	GSCOC_T00030761001	Actin-97	1.07062
Cc00_g27170	GSCOC_T00000230001	Calcium uniporter mitochondrial	1.07056
Cc00_g12370	GSCOC_T00013520001	Uncharacterized protein	1.06929
Cc03_g04670	GSCOC_T00026194001	Auxin-responsive IAA7	1.06895
Cc10_g07690	GSCOC_T00034491001	AP2-like ethylene-responsive transcription factor ANT	1.06799
Cc02_g01670	GSCOC_T00019995001	Serine threonine- kinase chloroplastic	1.0667
Cc10_g02630	GSCOC_T00024768001	Uncharacterized sugar kinase slr0537	1.06598
Cc04_g16540	GSCOC_T00035759001	Uncharacterized protein	1.06529
Cc05_g04400	GSCOC_T00031665001	STRICTOSIDINE SYNTHASE-LIKE 12	1.06477
Cc04_g01920	GSCOC_T00021856001	Uncharacterized protein	1.0642
Cc06_g17390	GSCOC_T00036383001	Probable 2-aminoethanethiol dioxygenase	1.06266
Cc05_g11890	GSCOC_T00021257001	DETOXIFICATION 19	1.06184
Cc01_g04410	GSCOC_T00004467001	Transcription factor bHLH122	1.06184
Cc08_g06750	GSCOC_T00005866001	ASPARTIC PROTEASE IN GUARD CELL 2	1.0616
Cc00_g14000	GSCOC_T00010021001	Probable pectate lyase 4	1.06056
Cc07_g08490	GSCOC_T00040223001	Uncharacterized protein	1.06033
Cc02_g02190	GSCOC_T00020066001	Anthocyanidin	1.05817
Cc06_g05290	GSCOC_T00043072001	phytosulfokines 6	1.05777
Cc00_g12390	GSCOC_T00013524001	Uncharacterized protein	1.0572
Cc02_g37180	GSCOC_T00028028001	Uncharacterized protein	1.05641
Cc11_g05520	GSCOC_T00020510001	Receptor kinase 2	1.05588
Cc09_g01080	GSCOC_T00017860001	E3 ubiquitin- ligase COP1	1.05339
Cc10_g14120	GSCOC_T00011999001	U-box domain-containing 28	1.05063
Cc03_g06840	GSCOC_T00026504001	Uncharacterized protein	1.05027
Cc05_g08900	GSCOC_T00016929001	Uncharacterized protein	1.04935
Cc10_g14960	GSCOC_T00033655001	Abscisic stress-ripening 2	1.04886
Cc07_g09780	GSCOC_T00037198001	Soluble inorganic pyrophosphatase	1.04863
Cc06_g20060	GSCOC_T00022904001	G2 mitotic-specific cyclin-1	1.04863
Cc11_g06500	GSCOC_T00020666001	Receptor 12	1.04808
Cc07_g02610	GSCOC_T00039461001	Zinc finger AN1 domain-containing stress-associated 12	1.04789
Cc08_g13230	GSCOC_T00030367001	transferase mitochondrial	1.04781
Cc07_g10120	GSCOC_T00037157001	Bifunctional epoxide hydrolase 2	1.04763
Cc10_g09620	GSCOC_T00031519001	Cytochrome P450 716B2	1.04758
Cc08_g10590	GSCOC_T00027030001	Glycine dehydrogenase (decarboxylating) mitochondrial	1.04563
Cc11_g12330	GSCOC_T00032332001	Uncharacterized protein	1.0455
Cc08_g14510	GSCOC_T00030213001	Probable copper-transporting ATPase HMA5	1.04505
Cc06_g04640	GSCOC_T00042977001	UDP-glycosyltransferase 73C4	1.04501
Cc03_g00500	GSCOC_T00025632001	Beta-glucosidase-like chloroplastic	1.04482
Cc02_g07660	GSCOC_T00029908001	Telomere repeat-binding 3	1.04458
Cc09_g02480	GSCOC_T00017671001	Uncharacterized protein	1.04151
Cc10_g10500	GSCOC_T00035985001	Phosphatidylinositol 4-phosphate 5-kinase 2	1.04022
Cc02_g28000	GSCOC_T00025160001	disease resistance RGA1	1.03852
Cc11_g15580	GSCOC_T00038075001	Glutamate--glyoxylate aminotransferase 1	1.03751
Cc04_g05480	GSCOC_T00022302001	Uncharacterized protein	1.03726
Cc07_g15520	GSCOC_T00036465001	Uncharacterized protein	1.03664
Cc08_g13290	GSCOC_T00030361001	Deoxyribodipyrimidine photo-lyase	1.03626
Cc07_g02630	GSCOC_T00039463001	Ferredoxin-thioredoxin reductase catalytic chloroplastic	1.03617
Cc05_g07710	GSCOC_T00016770001	Transcription activator GLK1	1.03483
Cc07_g01590	GSCOC_T00039332001	glucose-6-phosphate 1-epimerase	1.0345
Cc04_g16770	GSCOC_T00035787001	Probable methyltransferase PMT2	1.0329
Cc02_g21170	GSCOC_T00014754001	Dicarboxylate transporter chloroplastic	1.03274
Cc08_g03800	GSCOC_T00034173001	Pentatricopeptide repeat-containing At1g31920	1.03155
Cc03_g01280	GSCOC_T00025734001	Major allergen Pru ar 1	1.03139
Cc06_g04290	GSCOC_T00023743001	Uncharacterized protein	1.03113
Cc11_g03130	GSCOC_T00025463001	UDP-glycosyltransferase 76E2	1.02992
Cc07_g14660	GSCOC_T00036583001	WEB family chloroplastic	1.02926
Cc08_g06390	GSCOC_T00040935001	Zinc finger CONSTANS-LIKE 4	1.02747
Cc08_g09670	GSCOC_T00026913001	Mitogen-activated kinase kinase kinase 1	1.02676
Cc01_g10270	GSCOC_T00024112001	Uncharacterized protein	1.0262
Cc03_g01250	GSCOC_T00025731001	DEHYDRATION-INDUCED 19 homolog 3	1.02513
Cc04_g00650	GSCOC_T00021687001	Uncharacterized protein	1.02507
Cc08_g10640	GSCOC_T00027036001	Uncharacterized protein	1.02413
Cc08_g14120	GSCOC_T00030263001	Uncharacterized protein	1.02404
Cc02_g07500	GSCOC_T00029931001	Ribulose bisphosphate carboxylase oxygenase activase chloroplastic	1.02378
Cc02_g03750	GSCOC_T00020268001	Xyloglucan galactosyltransferase KATAMARI1 homolog	1.02343
Cc05_g13600	GSCOC_T00021040001	Uncharacterized protein	1.02173
Cc08_g08860	GSCOC_T00017220001	BURP domain RD22	1.0216
Cc07_g08180	GSCOC_T00040182001	Uncharacterized protein	1.02065
Cc05_g05690	GSCOC_T00035145001	Dynein regulatory complex subunit 3	1.02019
Cc08_g13900	GSCOC_T00030290001	3-ketoacyl- synthase 4	1.02003
Cc02_g21440	GSCOC_T00014785001	Uncharacterized protein	1.01976
Cc09_g10560	GSCOC_T00041031001	NAC domain-containing 94	1.01974
Cc00_g17980	GSCOC_T00010351001	Uncharacterized protein	1.01957
Cc01_g09030	GSCOC_T00023944001	Uncharacterized protein	1.01919
Cc02_g17350	GSCOC_T00014247001	F-box At2g16365	1.01914
Cc09_g07920	GSCOC_T00003778001	Glutathione S-transferase U15	1.01853
Cc00_g17860	GSCOC_T00008903001	Probable polygalacturonase	1.01827
Cc04_g16380	GSCOC_T00035729001	(-)-germacrene D synthase	1.01734
Cc06_g07840	GSCOC_T00031206001	Uncharacterized protein	1.01679
Cc06_g16910	GSCOC_T00004146001	Uncharacterized protein	1.01582
Cc09_g04210	GSCOC_T00017454001	Uncharacterized protein	1.01527
Cc07_g14000	GSCOC_T00036667001	Uncharacterized protein	1.01464
Cc06_g11360	GSCOC_T00041668001	Uncharacterized protein	1.01445
Cc07_g00790	GSCOC_T00019158001	Sulfite oxidase	1.01271
Cc10_g05140	GSCOC_T00034850001	Lecithin-cholesterol acyltransferase-like 1	1.0126
Cc11_g10250	GSCOC_T00032601001	NRT1 PTR FAMILY	1.01232
Cc10_g04090	GSCOC_T00034979001	Glutamate receptor	1.01227
Cc03_g05110	GSCOC_T00026254001	1-aminocyclopropane-1-carboxylate oxidase homolog 12	1.01215
Cc03_g14580	GSCOC_T00026676001	disease resistance RGA4	1.01108
Cc01_g14410	GSCOC_T00028439001	Uncharacterized protein	1.01094
Cc05_g11700	GSCOC_T00021281001	D-amino-acid chloroplastic	1.01077
Cc04_g01440	GSCOC_T00021795001	Uncharacterized protein	1.00987
Cc05_g10000	GSCOC_T00021513001	Uncharacterized protein	1.00958
Cc03_g05030	GSCOC_T00026240001	Cellulose synthase G1	1.00936
Cc01_g13400	GSCOC_T00028306001	Probable phosphatase 2C 24	1.00931
Cc04_g13420	GSCOC_T00018291001	UDP-glycosyltransferase 74B1	1.00884
Cc00_g16170	GSCOC_T00003317001	Uncharacterized protein	1.00858
Cc03_g01240	GSCOC_T00025730001	DEHYDRATION-INDUCED 19 homolog 3	1.00806
Cc03_g01320	GSCOC_T00025741001	Heavy metal-associated isoprenylated plant 26	1.00799
Cc02_g10320	GSCOC_T00029541001	Uncharacterized protein	1.00753
Cc10_g00620	GSCOC_T00024519001	Cyclin-B2-3	1.00736
Cc06_g20110	GSCOC_T00022914001	UDP-glucose flavonoid 3-O-glucosyltransferase 3	1.00581
Cc11_g06330	GSCOC_T00020643001	Beta-glucosidase 18	1.00542
Cc07_g03220	GSCOC_T00039543001	Uncharacterized protein At3g28850	1.0049
Cc02_g01700	GSCOC_T00019999001	Glutamate synthas	1.00334
Cc10_g02300	GSCOC_T00024731001	Cysteine ase RD21A	1.00307
Cc00_g28360	GSCOC_T00005593001	Heat stress transcription factor B-2c	1.00271
Cc10_g08170	GSCOC_T00034428001	Glutamyl-tRNA reductase chloroplastic	1.00258
Cc01_g13620	GSCOC_T00028335001	Uncharacterized protein	1.00212
Cc06_g22070	GSCOC_T00017141001	Cytochrome P450 83B1	1.002
Cc01_g12950	GSCOC_T00028252001	SUPPRESSOR OF GENE SILENCING 3 homolog	1.00175
Cc00_g06060	GSCOC_T00000135001	Beta-glucosidase 11	1.00145
Cc02_g07570	GSCOC_T00029920001	Aspartic ase nepenthesin-1	1.00025
Cc08_g11060	GSCOC_T00027097001	Probable WRKY transcription factor 50	1.00015
Cc10_g12380	GSCOC_T00031944001	ABC transporter C family member 9	1.0001
Cc01_g05850	GSCOC_T00027411001	Bidirectional sugar transporter SWEET3	1.00004
Cc09_g06750	GSCOC_T00005132001	Regulatory NPR3	0.999673
Cc01_g04400	GSCOC_T00004464001	Uncharacterized protein	0.999546
Cc10_g04900	GSCOC_T00034879001	Probable isoaspartyl peptidase L-asparaginase 2	0.999316
Cc02_g07750	GSCOC_T00029897001	Elicitor-responsive 1	0.999081
Cc01_g19030	GSCOC_T00016111001	Probable inactive kinase At3g63330	0.99853
Cc01_g03180	GSCOC_T00033153001	disease resistance RGA3	0.99779
Cc02_g01860	GSCOC_T00020023001	Probable WRKY transcription factor 41	0.99675
Cc10_g00150	GSCOC_T00024453001	Calvin cycle CP12- chloroplastic	0.995822
Cc05_g04840	GSCOC_T00035020001	Septum-promoting GTP-binding 1	0.995614
Cc04_g03660	GSCOC_T00022063001	Aspartate aminotransferase	0.995601
Cc11_g06820	GSCOC_T00020710001	LRR receptor-like serine threonine- kinase FLS2	0.994164
Cc02_g20290	GSCOC_T00014638001	Pathogenesis-related 1B	0.993868
Cc04_g13100	GSCOC_T00011379001	Uncharacterized protein At5g5010	0.993806
Cc02_g05160	GSCOC_T00039017001	Pheophorbidase	0.992149
Cc09_g03550	GSCOC_T00017534001	Zinc finger CCCH domain-containing 33	0.992123
Cc03_g13300	GSCOC_T00018946001	LRR receptor-like serine threonine- kinase EFR	0.99209
Cc09_g07440	GSCOC_T00036257001	Reticuline oxidase	0.990717
Cc02_g22330	GSCOC_T00014902001	Basic blue	0.990523
Cc07_g08730	GSCOC_T00040261001	Uncharacterized protein	0.989651
Cc03_g10090	GSCOC_T00031011001	Major allergen Pru ar 1	0.98856
Cc04_g03620	GSCOC_T00022057001	Auxin-responsive IAA16	0.986702
Cc00_g29940	GSCOC_T00006232001	Beta-galactosidase	0.986671
Cc10_g11300	GSCOC_T00018485001	Serine threonine- kinase CCR4	0.985792
Cc01_g03290	GSCOC_T00033134001	Uncharacterized protein	0.985447
Cc05_g10020	GSCOC_T00021511001	Translation initiation factor IF- chloroplastic	0.985266
Cc11_g08970	GSCOC_T00032804001	late blight resistance homolog R1A-6	0.984266
Cc04_g04630	GSCOC_T00022193001	Uncharacterized protein	0.983556
Cc01_g06280	GSCOC_T00029992001	Lichenase	0.983469
Cc05_g07620	GSCOC_T00016757001	Reticulon B17	0.982929
Cc05_g07520	GSCOC_T00042283001	Uncharacterized protein	0.982855
Cc03_g13990	GSCOC_T00031780001	Disease resistance RPS2	0.982266
Cc05_g07900	GSCOC_T00016794001	OPA3	0.981452
Cc07_g07830	GSCOC_T00040144001	Uncharacterized protein	0.980102
Cc03_g05360	GSCOC_T00026285001	Auxin-induced 5NG4	0.979169
Cc06_g17450	GSCOC_T00036396001	Chaperone 1	0.978214
Cc08_g08890	GSCOC_T00017226001	BURP domain-containing 3	0.976809
Cc00_g26060	GSCOC_T00003724001	Uncharacterized protein	0.976217
Cc02_g38460	GSCOC_T00027860001	REVEILLE 3	0.975435
Cc05_g07810	GSCOC_T00016784001	Glutaredoxin-C9	0.97457
Cc03_g07780	GSCOC_T00026642001	Myb family transcription factor APL	0.974152
Cc01_g21670	GSCOC_T00004952001	Uncharacterized protein	0.973512
Cc06_g09550	GSCOC_T00041899001	Aldehyde dehydrogenase family 2 member C4	0.972663
Cc04_g06890	GSCOC_T00022490001	Probable non-specific lipid-transfer AKCS9	0.972662
Cc01_g15180	GSCOC_T00016595001	CBL-interacting serine threonine- kinase 11	0.97201
Cc02_g08890	GSCOC_T00029734001	L-allo-threonine aldolase	0.971938
Cc03_g10010	GSCOC_T00031000001	Rho GDP-dissociation inhibitor	0.971902
Cc04_g09380	GSCOC_T00022825001	Potassium transporter 2	0.971505
Cc10_g06050	GSCOC_T00034718001	Transcription factor TGA7	0.970329
Cc04_g13250	GSCOC_T00018903001	Chaperone 1	0.970185
Cc06_g13630	GSCOC_T00041368001	CBL-interacting serine threonine- kinase 21	0.968599
Cc07_g11640	GSCOC_T00036978001	Probable serine acetyltransferase 2	0.967963
Cc02_g13200	GSCOC_T00029187001	Allantoinase	0.967108
Cc05_g02830	GSCOC_T00020875001	Tyrosine- phosphatase DSP1	0.966914
Cc04_g08420	GSCOC_T00022700001	Uncharacterized protein	0.96572
Cc08_g16340	GSCOC_T00035591001	Cellulose synthase G3	0.965406
Cc07_g03450	GSCOC_T00039574001	E3 ubiquitin- ligase RING1	0.964522
Cc11_g15810	GSCOC_T00038102001	Beta-	0.963951
Cc01_g16600	GSCOC_T00016421001	Anthocyanidin 3-O-glucosyltransferase	0.962871
Cc06_g15970	GSCOC_T00030751001	18 kDa seed maturation	0.962791
Cc11_g15290	GSCOC_T00038039001	Polygalacturonase At1g48100	0.962697
Cc06_g12770	GSCOC_T00041496001	1-phosphatidylinositol 3-phosphate 5-kinase FAB1	0.961751
Cc05_g14940	GSCOC_T00038756001	Fasciclin-like arabinogalactan 1	0.960051
Cc00_g08290	GSCOC_T00004569001	Disease resistance response 206	0.959926
Cc02_g15670	GSCOC_T00014024001	ER lumen -retaining receptor A	0.959256
Cc05_g12660	GSCOC_T00021161001	Uncharacterized protein	0.959221
Cc05_g13320	GSCOC_T00021077001	Pectinesterase	0.958613
Cc07_g07990	GSCOC_T00040161001	Uncharacterized protein	0.95854
Cc06_g16930	GSCOC_T00004149001	Nuclear transcription factor Y subunit A-7	0.958038
Cc02_g15570	GSCOC_T00014011001	Uncharacterized protein	0.957409
Cc06_g12710	GSCOC_T00041503001	Polyphosphoinositide phosphatase	0.957027
Cc01_g17110	GSCOC_T00016362001	Desumoylating isopeptidase 1	0.956595
Cc04_g02590	GSCOC_T00021932001	NADP-dependent malic chloroplastic	0.956578
Cc01_g19980	GSCOC_T00015989001	LEC14B	0.956405
Cc10_g11870	GSCOC_T00031865001	F-box kelch-repeat At3g06240	0.956268
Cc07_g08970	GSCOC_T00040289001	Rhomboid protease	0.956138
Cc08_g11010	GSCOC_T00027091001	Probable phosphatase 2C 6	0.95478
Cc10_g04990	GSCOC_T00034865001	Uncharacterized protein	0.954121
Cc08_g09390	GSCOC_T00017294001	Uncharacterized protein	0.954117
Cc08_g13300	GSCOC_T00030360001	Deoxyribodipyrimidine photo-lyase	0.953452
Cc01_g05920	GSCOC_T00027420001	GAST1	0.952787
Cc06_g09370	GSCOC_T00041924001	Sigma factor regulation	0.952396
Cc11_g10540	GSCOC_T00032564001	Allene oxide cyclase chloroplastic	0.951268
Cc02_g20410	GSCOC_T00014654001	Uncharacterized protein	0.95112
Cc11_g17080	GSCOC_T00038264001	Uncharacterized protein	0.951048
Cc05_g10350	GSCOC_T00021458001	Gibberellin 2-beta-dioxygenase 3	0.95072
Cc06_g11270	GSCOC_T00041678001	Cycloartenol-C-24-methyltransferase 1	0.9506
Cc00_g19590	GSCOC_T00013147001	Zinc finger A20 and AN1 domain-containing stress-associated 5	0.950585
Cc06_g11700	GSCOC_T00041626001	Uncharacterized protein	0.950509
Cc11_g01930	GSCOC_T00019491001	RNA-binding EWS	0.949957
Cc09_g06900	GSCOC_T00005151001	LRR receptor-like serine threonine- kinase GSO1	0.949885
Cc02_g17010	GSCOC_T00014204001	GATA transcription factor 5	0.948971
Cc07_g07230	GSCOC_T00040063001	Galactomannan galactosyltransferase 1	0.948893
Cc02_g20480	GSCOC_T00014661001	K(+) efflux antiporter chloroplastic	0.947684
Cc02_g35310	GSCOC_T00042866001	Uncharacterized protein	0.94703
Cc11_g13020	GSCOC_T00032235001	Uncharacterized protein	0.946738
Cc06_g20390	GSCOC_T00022969001	Cytochrome P450 98A3	0.946484
Cc02_g09910	GSCOC_T00029593001	kinase G11A	0.946285
Cc02_g10620	GSCOC_T00029509001	Malate dehydrogenas	0.945889
Cc11_g09140	GSCOC_T00032777001	Probable S-adenosylmethionine-dependent methyltransferase At5g37990	0.945407
Cc03_g03600	GSCOC_T00026053001	Uncharacterized protein C24B11.05	0.944895
Cc05_g08890	GSCOC_T00016928001	Secologanin synthase	0.944725
Cc06_g02250	GSCOC_T00023476001	Transcription factor EMB1444	0.94418
Cc10_g10000	GSCOC_T00031473001	Uncharacterized protein	0.94353
Cc04_g04400	GSCOC_T00022164001	Uncharacterized protein	0.94337
Cc07_g10360	GSCOC_T00037124001	Cytochrome P450 84A1	0.943163
Cc06_g02760	GSCOC_T00023539001	RING-H2 finger ATL33	0.942621
Cc02_g26520	GSCOC_T00024949001	PHLOEM PROTEIN 2-LIKE A1	0.942595
Cc08_g06740	GSCOC_T00005865001	ASPARTIC PROTEASE IN GUARD CELL 1	0.942447
Cc08_g14600	GSCOC_T00030202001	Probable phospholipid hydroperoxide glutathione peroxidase	0.941224
Cc00_g09980	GSCOC_T00006383001	Uncharacterized protein	0.940517
Cc05_g01900	GSCOC_T00015780001	Uncharacterized membrane At3g27390	0.940468
Cc10_g09170	GSCOC_T00034285001	Xanthotoxin 5-hydroxylase CYP82C2	0.940236
Cc03_g04450	GSCOC_T00026165001	Uncharacterized protein	0.939961
Cc04_g07160	GSCOC_T00022522001	Zinc finger CONSTANS-LIKE 16	0.939677
Cc06_g03560	GSCOC_T00023641001	Serine threonine- kinase ATM	0.939331
Cc06_g06960	GSCOC_T00031320001	ABC transporter G family member 22	0.938295
Cc11_g00030	GSCOC_T00010269001	Uncharacterized protein At5g02240	0.937989
Cc02_g19390	GSCOC_T00014505001	Uncharacterized protein	0.937095
Cc07_g14060	GSCOC_T00036660001	Uncharacterized protein	0.936573
Cc05_g10650	GSCOC_T00021413001	Bidirectional sugar transporter SWEET2	0.935619
Cc02_g38780	GSCOC_T00027812001	BAG family molecular chaperone regulator 6	0.935061
Cc06_g03670	GSCOC_T00023656001	Uncharacterized protein	0.934688
Cc06_g03060	GSCOC_T00023577001	Kinesin KIN-5C	0.934245
Cc06_g03080	GSCOC_T00023579001	F-box At2g39490	0.933645
Cc02_g32730	GSCOC_T00016689001	Uncharacterized protein	0.932184
Cc03_g14210	GSCOC_T00031815001	Basic endochitinase	0.931811
Cc01_g13750	GSCOC_T00028352001	Uncharacterized RNA-binding	0.931746
Cc05_g14930	GSCOC_T00038757001	TIC 20- chloroplastic	0.93169
Cc05_g13640	GSCOC_T00021036001	translation factor SUI1 homolog	0.931585
Cc02_g27890	GSCOC_T00025144001	Uncharacterized protein	0.931114
Cc06_g11160	GSCOC_T00041691001	Serine acetyltransferase 5	0.930264
Cc00_g03770	GSCOC_T00002032001	Probable mitochondrial chaperone BCS1-B	0.928949
Cc07_g13270	GSCOC_T00036764001	Uncharacterized protein	0.927789
Cc02_g03290	GSCOC_T00020206001	Inactive rhomboid 1	0.927423
Cc00_g20260	GSCOC_T00010403001	Bifunctional uridylyltransferase uridylyl-removing enzyme	0.927096
Cc00_g01370	GSCOC_T00010635001	L-type lectin-domain containing receptor kinase	0.926218
Cc08_g15820	GSCOC_T00035525001	High mobility group B 6	0.923378
Cc01_g09620	GSCOC_T00024023001	Pleiotropic drug resistance 2	0.922936
Cc02_g26540	GSCOC_T00024951001	disease resistance At3g14460	0.921976
Cc10_g00320	GSCOC_T00024480001	Uncharacterized protein	0.921953
Cc03_g05040	GSCOC_T00026241001	Cellulose synthase G2	0.920549
Cc11_g16690	GSCOC_T00038213001	Urease	0.920079
Cc08_g13050	GSCOC_T00030389001	Elongation factor G- chloroplastic	0.919869
Cc00_g24310	GSCOC_T00006031001	UDP-rhamnose:rhamnosyltransferase 1	0.919828
Cc02_g03410	GSCOC_T00020225001	domain-containing	0.91886
Cc00_g02800	GSCOC_T00009759001	Agamous-like MADS-box AGL8 homolog	0.918491
Cc00_g16250	GSCOC_T00009567001	Uncharacterized protein	0.916937
Cc02_g00720	GSCOC_T00019862001	Heavy metal-associated isoprenylated plant 26	0.916857
Cc01_g15130	GSCOC_T00016600001	CBL-interacting serine threonine- kinase 10	0.9166
Cc08_g03290	GSCOC_T00010790001	Probable transcription factor KAN2	0.916446
Cc04_g07410	GSCOC_T00022559001	ATP-dependent Clp protease adapter	0.9164
Cc07_g11060	GSCOC_T00037043001	3-dehydroquinate synthase	0.916024
Cc01_g13130	GSCOC_T00028273001	Uncharacterized protein C24B11.05	0.915206
Cc00_g28990	GSCOC_T00011722001	NRT1 PTR FAMILY	0.914686
Cc08_g08240	GSCOC_T00007244001	Uncharacterized protein	0.914671
Cc02_g35660	GSCOC_T00042815001	S-adenosylmethionine synthase 5	0.9141
Cc01_g19100	GSCOC_T00016102001	Uncharacterized protein	0.913887
Cc04_g02670	GSCOC_T00021943001	Uncharacterized protein	0.91243
Cc01_g11250	GSCOC_T00024248001	Probable pyridoxal 5 -phosphate synthase subunit PDX2	0.912076
Cc10_g07520	GSCOC_T00034512001		0.911788
Cc00_g15590	GSCOC_T00013443001	Amidase 1	0.911249
Cc02_g04310	GSCOC_T00020342001	Peroxisomal membrane 11-4	0.910272
Cc05_g04870	GSCOC_T00035025001	Sigma intracellular receptor 2	0.910157
Cc11_g14690	GSCOC_T00032023001	Polygalacturonase-1 non-catalytic subunit beta	0.909185
Cc05_g11000	GSCOC_T00021370001	Pathogen-related	0.908328
Cc10_g07680	GSCOC_T00034492001	AP2-like ethylene-responsive transcription factor ANT	0.908174
Cc02_g06480	GSCOC_T00039182001	CTD small phosphatase 2	0.907009
Cc01_g13670	GSCOC_T00028342001	Tubulin beta-8 chain	0.906235
Cc03_g01230	GSCOC_T00025729001	Two-component response regulator ARR1	0.906234
Cc04_g10280	GSCOC_T00042573001	Uncharacterized aarF domain-containing kinase 1	0.904435
Cc06_g16940	GSCOC_T00004150001	Uncharacterized protein	0.904073
Cc06_g15160	GSCOC_T00030870001	CBL-interacting serine threonine- kinase 6	0.903884
Cc03_g00200	GSCOC_T00025598001	Pto-interacting 1	0.902996
Cc11_g10840	GSCOC_T00032523001	Uncharacterized protein	0.902149
Cc08_g00980	GSCOC_T00038444001	NEDD4-binding 2	0.901647
Cc08_g11560	GSCOC_T00027160001	Flavonol synthase flavanone 3-hydroxylase	0.900058
Cc02_g28010	GSCOC_T00025161001	Uncharacterized protein	0.900047
Cc06_g20970	GSCOC_T00015836001	Succinate dehydrogenas	0.898624
Cc02_g24830	GSCOC_T00028835001	Uncharacterized protein	0.898082
Cc10_g13900	GSCOC_T00035223001	Probable serine threonine- kinase PBL11	0.896897
Cc02_g08570	GSCOC_T00029776001	Chalcone--flavonone isomerase	0.896885
Cc11_g13530	GSCOC_T00032170001	NRT1 PTR FAMILY	0.89643
Cc01_g19680	GSCOC_T00016027001	Uncharacterized protein	0.896129
Cc11_g05220	GSCOC_T00020463001	Lipid transfer VAS	0.896007
Cc10_g06590	GSCOC_T00034635001	RING-H2 finger ATL54	0.895039
Cc08_g16310	GSCOC_T00035588001	B2	0.895007
Cc06_g07440	GSCOC_T00031260001	E3 ubiquitin- ligase RING1-like	0.893634
Cc01_g16900	GSCOC_T00016388001	LON peptidase N-terminal domain and RING finger 3	0.893239
Cc01_g11670	GSCOC_T00028073001	Dof zinc finger	0.893072
Cc05_g08650	GSCOC_T00016892001	chloroplastic	0.892555
Cc06_g06550	GSCOC_T00031369001	Receptor kinase TMK1	0.892024
Cc00_g13270	GSCOC_T00011541001	Esterase PIR7B	0.890881
Cc07_g13310	GSCOC_T00036760001	Nudix hydrolase mitochondrial	0.890642
Cc00_g12090	GSCOC_T00005877001	Fatty acid amide hydrolase	0.889517
Cc10_g00640	GSCOC_T00024521001		0.889075
Cc02_g02850	GSCOC_T00020154001	Uncharacterized protein	0.889035
Cc04_g08240	GSCOC_T00022678001	Pol	0.888389
Cc00_g33900	GSCOC_T00010189001	Uncharacterized protein	0.888121
Cc00_g21770	GSCOC_T00013697001	Palmitoyl-acyl carrier chloroplastic	0.88644
Cc02_g14260	GSCOC_T00013833001	GDSL esterase lipase At5g45960	0.885244
Cc01_g14160	GSCOC_T00028407001	DAMAGED DNA-BINDING 2	0.884957
Cc10_g05770	GSCOC_T00034768001	F-box kelch-repeat At5g43190	0.884915
Cc08_g16060	GSCOC_T00035555001	RING-H2 finger ATL21A	0.884857
Cc11_g06830	GSCOC_T00020711001	Receptor 12	0.884062
Cc01_g16880	GSCOC_T00016390001	Small ubiquitin-related modifier 2	0.883898
Cc06_g19180	GSCOC_T00028970001	Uncharacterized protein	0.883744
Cc02_g14570	GSCOC_T00013870001	GDSL esterase lipase At1g28580	0.883647
Cc10_g03220	GSCOC_T00024844001	Uncharacterized protein	0.883479
Cc04_g01990	GSCOC_T00021864001	Beta-galactosidase	0.882909
Cc10_g16060	GSCOC_T00033816001	Probable sucrose-phosphate synthase 4	0.882869
Cc01_g20250	GSCOC_T00015956001	Probable indole-3-pyruvate monooxygenase YUCCA10	0.882378
Cc02_g07670	GSCOC_T00029906001	Expansin-A4	0.881411
Cc02_g37870	GSCOC_T00027935001	UPF0187 chloroplastic	0.879457
Cc07_g04300	GSCOC_T00039684001	Transcription factor TCP5	0.879374
Cc00_g04150	GSCOC_T00006602001	Auxin-induced in root cultures 12	0.879051
Cc06_g08090	GSCOC_T00031176001	AC transposase	0.87449
Cc01_g13010	GSCOC_T00028258001	PGR5 chloroplastic	0.874338
Cc02_g18360	GSCOC_T00014377001	Kinesin KIF15	0.873047
Cc02_g06030	GSCOC_T00039127001	Cytosolic endo-beta-N-acetylglucosaminidase	0.872452
Cc04_g16640	GSCOC_T00035771001	Myb-related 306	0.872345
Cc02_g30740	GSCOC_T00023816001	Non-symbiotic hemoglobin 2	0.870798
Cc10_g12630	GSCOC_T00031982001	Myosin heavy chain kinase B	0.870035
Cc02_g24700	GSCOC_T00028852001	Zinc finger ZAT4	0.869663
Cc02_g04760	GSCOC_T00020398001	Zinc finger CCCH domain-containing 44	0.868909
Cc02_g15280	GSCOC_T00013969001	Probable LRR receptor-like serine threonine- kinase At3g47570	0.86882
Cc01_g21210	GSCOC_T00005007001	Uncharacterized protein	0.867947
Cc08_g00290	GSCOC_T00005587001	Uncharacterized protein	0.866682
Cc06_g11570	GSCOC_T00041642001	Heat stress transcription factor A-2	0.866208
Cc11_g10900	GSCOC_T00032514001	Phosphate transporter PHO1 homolog 1	0.865833
Cc05_g14870	GSCOC_T00038767001	Uncharacterized protein	0.865729
Cc08_g12260	GSCOC_T00030505001	Formyltetrahydrofolate deformylase	0.865344
Cc11_g14730	GSCOC_T00032018001	NADPH-dependent alkenal one chloroplastic	0.864759
Cc11_g08710	GSCOC_T00032837001	Uncharacterized protein	0.864659
Cc03_g03680	GSCOC_T00026065001	Heat shock 70 kDa 8	0.861613
Cc02_g06580	GSCOC_T00039200001	GDSL esterase lipase CPRD49	0.861485
Cc09_g10840	GSCOC_T00040996001	Monosaccharide-sensing 2	0.861154
Cc08_g07850	GSCOC_T00011880001	WRKY transcription factor 18	0.861015
Cc06_g13620	GSCOC_T00041369001	CBL-interacting serine threonine- kinase 21	0.86087
Cc07_g11680	GSCOC_T00036973001	G2 mitotic-specific cyclin-1	0.860757
Cc01_g21080	GSCOC_T00005024001	Uncharacterized protein	0.860633
Cc01_g07920	GSCOC_T00015471001	late blight resistance homolog R1B-16	0.860441
Cc11_g14920	GSCOC_T00001042001	Uncharacterized protein At4g14100	0.860264
Cc02_g12940	GSCOC_T00029218001	Bifunctional epoxide hydrolase 2	0.860033
Cc06_g00140	GSCOC_T00023181001	Calcium-binding CAST	0.859808
Cc02_g28060	GSCOC_T00025167001	Nuclear transcription factor Y subunit A-1	0.859725
Cc09_g09260	GSCOC_T00023074001	60S ribosomal L18a	0.85832
Cc01_g09240	GSCOC_T00023971001	Serine carboxypeptidase-like 2	0.857847
Cc11_g06510	GSCOC_T00020667001	Uncharacterized protein	0.857095
Cc05_g15440	GSCOC_T00038691001	chloroplastic mitochondrial	0.856586
Cc09_g00820	GSCOC_T00017899001	F-box CPR1	0.85643
Cc01_g07750	GSCOC_T00015449001	homolog	0.856296
Cc08_g11780	GSCOC_T00027189001	Purine permease 3	0.855854
Cc08_g02750	GSCOC_T00037762001	Abscisic acid receptor PYR1	0.855201
Cc00_g13810	GSCOC_T00007198001	Acyl- --sterol O-acyltransferase 1	0.854991
Cc05_g04510	GSCOC_T00031682001	late blight resistance homolog R1B-14	0.854666
Cc08_g09940	GSCOC_T00026949001	Receptor kinase 5	0.854584
Cc11_g17170	GSCOC_T00038276001	Probable WRKY transcription factor 75	0.854504
Cc03_g09870	GSCOC_T00030977001	Probable aldo-keto reductase 2	0.853689
Cc02_g31570	GSCOC_T00027534001	Polyubiquitin 4	0.851701
Cc02_g00210	GSCOC_T00019796001	Uncharacterized protein	0.851409
Cc00_g11390	GSCOC_T00004898001	Basic leucine zipper 9	0.851011
Cc02_g14040	GSCOC_T00029066001	F-box At1g22220	0.850275
Cc04_g06430	GSCOC_T00022429001	Serine threonine- kinase CTR1	0.84978
Cc08_g01790	GSCOC_T00038331001	Dynamin-related 1E	0.848871
Cc02_g06450	GSCOC_T00039179001	Chaperone	0.84857
Cc09_g06510	GSCOC_T00005102001	AP2-like ethylene-responsive transcription factor At2g41710	0.848359
Cc04_g07490	GSCOC_T00022569001	Transcription factor MYB1R1	0.84782
Cc06_g10750	GSCOC_T00041738001	Nudix hydrolase 8	0.847085
Cc04_g04580	GSCOC_T00022187001	Clustered mitochondria homolog	0.846625
Cc00_g26120	GSCOC_T00002040001	Serine arginine-rich splicing factor 10	0.84555
Cc05_g08260	GSCOC_T00016844001	LRR receptor-like serine threonine- kinase GSO1	0.84541
Cc05_g05190	GSCOC_T00035076001	Uncharacterized protein	0.845359
Cc08_g02100	GSCOC_T00037671001	Two-component response regulator-like APRR2	0.84489
Cc00_g29080	GSCOC_T00008842001	Beta-galactosidase	0.844686
Cc05_g08060	GSCOC_T00016815001	Transcription factor TCP4	0.843995
Cc00_g07510	GSCOC_T00000516001	DETOXIFICATION 41	0.84382
Cc07_g04690	GSCOC_T00039726001	Uncharacterized protein	0.843363
Cc10_g02610	GSCOC_T00024766001	Auxilin-related 2	0.842424
Cc02_g21690	GSCOC_T00014813001	Uncharacterized protein C24B11.05	0.842132
Cc01_g17800	GSCOC_T00016280001	Uncharacterized protein	0.841109
Cc00_g31150	GSCOC_T00010596001	F-box kelch-repeat At1g51550	0.840028
Cc07_g10740	GSCOC_T00037080001	Naringeni	0.839868
Cc06_g03740	GSCOC_T00023665001	Uncharacterized protein	0.837542
Cc02_g28170	GSCOC_T00025184001	DNA topoisomerase 2	0.837332
Cc02_g07430	GSCOC_T00029942001	phosphatase 2C 37	0.836524
Cc08_g00140	GSCOC_T00005569001	Uncharacterized protein	0.835766
Cc02_g33500	GSCOC_T00015381001	Uncharacterized protein	0.835483
Cc00_g06670	GSCOC_T00007492001	Bifunctional dihydroflavonol 4-reductase flavanone 4-reductase	0.835445
Cc02_g04570	GSCOC_T00020374001	Hexose carrier HEX6	0.834135
Cc04_g16160	GSCOC_T00042408001	TORTIFOLIA1 1	0.834065
Cc03_g12930	GSCOC_T00030635001	Uncharacterized protein	0.833763
Cc02_g09470	GSCOC_T00029652001	Uncharacterized protein	0.833439
Cc06_g02790	GSCOC_T00023542001	Uncharacterized protein	0.833186
Cc09_g06740	GSCOC_T00005130001	Transmembrane 56	0.832138
Cc10_g05790	GSCOC_T00034765001	Tetratricopeptide repeat 7A	0.831964
Cc02_g24930	GSCOC_T00028822001	Phosphatidylglycerophosphatase and -tyrosine phosphatase 1	0.830942
Cc09_g02150	GSCOC_T00017712001	Monoglyceride lipase	0.8308
Cc00_g06790	GSCOC_T00007408001	Nitrile-specifier 5	0.830687
Cc05_g05110	GSCOC_T00035063001	Cytochrome P450 71D10	0.830408
Cc06_g07170	GSCOC_T00031297001	Uncharacterized protein	0.830025
Cc04_g05080	GSCOC_T00022253001	WRKY transcription factor 18	0.829683
Cc03_g01880	GSCOC_T00025817001	Translocase of chloroplast chloroplastic	0.829101
Cc02_g00420	GSCOC_T00019819001	Anaphase-promoting complex subunit cdc20	0.829048
Cc02_g10510	GSCOC_T00029522001	Non-symbiotic hemoglobin 2	0.828013
Cc04_g15840	GSCOC_T00042371001	Calcium-dependent kinase 10	0.826152
Cc11_g08850	GSCOC_T00032819001	Spore coat A	0.825482
Cc02_g11180	GSCOC_T00029445001	Splicing factor ESS-2 homolog	0.824882
Cc06_g01320	GSCOC_T00023347001	Phosphoinositide phospholipase C 2	0.824464
Cc09_g09430	GSCOC_T00023043001	Cytochrome P450 710A1	0.824151
Cc02_g05230	GSCOC_T00039025001	Uncharacterized protein	0.823615
Cc00_g19010	GSCOC_T00001295001	Chalcone synthase E	0.823462
Cc07_g03410	GSCOC_T00039570001	8-amino-7-oxononanoate synthase	0.823294
Cc07_g05200	GSCOC_T00039786001	Probable calcium-binding CML41	0.822319
Cc07_g17930	GSCOC_T00018828001	S-acyltransferase 24	0.822025
Cc10_g01580	GSCOC_T00024638001	Chaperone dnaJ chloroplastic	0.821871
Cc10_g03120	GSCOC_T00024833001	Cytochrome P450 734A1	0.820972
Cc05_g02990	GSCOC_T00033479001	Uncharacterized protein	0.82062
Cc08_g10270	GSCOC_T00026990001	Probable leucine-rich repeat receptor kinase At1g35710	0.820504
Cc10_g00870	GSCOC_T00024547001	Dehydrin ERD10	0.820451
Cc00_g10830	GSCOC_T00000627001	Galactinol--sucrose galactosyltransferase	0.818463
Cc02_g13990	GSCOC_T00029072001	Glutaredoxin-C9	0.818186
Cc01_g15700	GSCOC_T00016532001	MLO 1	0.817744
Cc11_g10200	GSCOC_T00032609001	Bifunctional dihydroflavonol 4-reductase flavanone 4-reductase	0.817238
Cc05_g12510	GSCOC_T00021183001	NAC domain-containing 18	0.81377
Cc04_g15630	GSCOC_T00042339001	Xanthoxin dehydrogenase	0.813563
Cc04_g16070	GSCOC_T00042398001	Polynucleotide 5 -hydroxyl-kinase NOL9	0.81296
Cc04_g03610	GSCOC_T00022056001	Auxin-induced 22A	0.812344
Cc09_g03780	GSCOC_T00017503001	Uncharacterized protein	0.811407
Cc02_g35650	GSCOC_T00042816001	Uncharacterized protein	0.810764
Cc02_g19480	GSCOC_T00014516001	Uncharacterized protein	0.810503
Cc05_g11280	GSCOC_T00021336001	nucleic acid deglycase DJ-1	0.81046
Cc08_g06320	GSCOC_T00040951001	E3 ubiquitin- ligase RHF1A	0.810429
Cc09_g08020	GSCOC_T00003796001	Nuclear transcription factor Y subunit A-7	0.810118
Cc05_g12430	GSCOC_T00021192001	Uncharacterized protein	0.807989
Cc02_g08460	GSCOC_T00029791001	-tyrosine-phosphatase MKP1	0.806532
Cc01_g09000	GSCOC_T00023941001	FANTASTIC FOUR 3	0.806166
Cc04_g09270	GSCOC_T00022810001	Purple acid phosphatase 17	0.8056
Cc10_g01440	GSCOC_T00024615001	ABC transporter B family member 13	0.805122
Cc02_g11220	GSCOC_T00029439001	Uncharacterized protein	0.805007
Cc07_g05450	GSCOC_T00039817001	Guanine nucleotide-binding alpha-2 subunit	0.804677
Cc11_g04530	GSCOC_T00004805001	late blight resistance homolog R1A-6	0.804588
Cc02_g22070	GSCOC_T00014865001	UPF0496 4	0.804214
Cc10_g13260	GSCOC_T00035320001	Proline-rich receptor kinase PERK2	0.803506
Cc06_g15130	GSCOC_T00030876001	Formin 13	0.802641
Cc02_g38000	GSCOC_T00027919001	Rop guanine nucleotide exchange factor 2	0.80205
Cc01_g13980	GSCOC_T00028383001	Josephin	0.80122
Cc10_g02910	GSCOC_T00024801001	Uncharacterized protein At1g01500	0.800853
Cc10_g07750	GSCOC_T00034483001	Squalene monooxygenase	0.800507
Cc00_g03220	GSCOC_T00011585001	Uncharacterized protein	0.799751
Cc06_g18950	GSCOC_T00028934001	STRICTOSIDINE SYNTHASE-LIKE 11	0.799541
Cc04_g03150	GSCOC_T00022007001	Ras-related Rab7	0.799308
Cc02_g03450	GSCOC_T00020229001	ABC transporter B family member 28	0.799033
Cc06_g04520	GSCOC_T00042964001	Zinc finger ZAT5	0.798801
Cc02_g10800	GSCOC_T00029489001	Uncharacterized protein ycf45	0.798583
Cc06_g21680	GSCOC_T00015560001	cadmium zinc-transporting ATPase HMA4	0.798471
Cc04_g06440	GSCOC_T00022430001	Serine threonine- kinase CTR1	0.798116
Cc02_g22820	GSCOC_T00014960001	MLO 4	0.797883
Cc09_g06770	GSCOC_T00005135001	argonaute 3	0.797786
Cc10_g03650	GSCOC_T00024897001	Cytochrome P450 82A3	0.797446
Cc04_g07370	GSCOC_T00022553001	ASPARTIC PROTEASE IN GUARD CELL 1	0.797244
Cc01_g08010	GSCOC_T00015487001	Probable carboxylesterase 15	0.797171
Cc08_g10310	GSCOC_T00026995001	Uncharacterized protein	0.796916
Cc07_g09000	GSCOC_T00040293001	Thylakoid membrane slr0575	0.796158
Cc06_g12280	GSCOC_T00041555001	Uncharacterized protein	0.796043
Cc00_g15060	GSCOC_T00008516001	Sec14 cytosolic factor	0.795896
Cc07_g13020	GSCOC_T00036802001	Uncharacterized protein	0.795509
Cc01_g14130	GSCOC_T00028404001	Phospholipase C 2	0.795047
Cc07_g13720	GSCOC_T00036703001	Probable mannitol dehydrogenase	0.794805
Cc09_g00440	GSCOC_T00017950001	Uncharacterized protein	0.794727
Cc00_g22350	GSCOC_T00000296001	Uncharacterized protein	0.794622
Cc02_g38520	GSCOC_T00027853001	late blight resistance homolog R1A-3	0.794503
Cc08_g17020	GSCOC_T00035681001	Soluble inorganic pyrophosphatase PPA1	0.794489
Cc07_g09820	GSCOC_T00037194001	Pentatricopeptide repeat-containing mitochondrial	0.793696
Cc10_g06060	GSCOC_T00034717001	Chaperone	0.793343
Cc00_g23350	GSCOC_T00012066001	O-acyltransferase WSD1	0.793123
Cc10_g00430	GSCOC_T00024493001	Glucan endo-	0.792682
Cc00_g02260	GSCOC_T00007929001	Heparanase 2	0.792484
Cc05_g08360	GSCOC_T00016854001	Phosphoenolpyruvate carboxylase 2	0.791947
Cc03_g07380	GSCOC_T00026588001	Uncharacterized protein sll0005	0.79132
Cc02_g02660	GSCOC_T00020127001	Short-chain dehydrogenase TIC chloroplastic	0.791306
Cc10_g00410	GSCOC_T00024491001	Glyceraldehyde-3-phosphate dehydrogenase chloroplastic	0.791098
Cc08_g09890	GSCOC_T00026943001	Histidine-containing phosphotransfer 4	0.790967
Cc08_g13620	GSCOC_T00030321001	Copper chaperone for superoxide dismutase	0.790832
Cc11_g15120	GSCOC_T00001013001	Uncharacterized protein	0.790003
Cc08_g00770	GSCOC_T00038466001	SPX domain-containing 2	0.788855
Cc09_g10500	GSCOC_T00041037001	Lysine histidine transporter-like 7	0.788776
Cc02_g01290	GSCOC_T00019945001	Luminal-binding 5	0.788495
Cc05_g13080	GSCOC_T00021107001	Chitin-inducible gibberellin-responsive 1	0.788343
Cc09_g07370	GSCOC_T00036271001	Patellin-4	0.787339
Cc02_g09310	GSCOC_T00029671001	homolog	0.786492
Cc02_g04840	GSCOC_T00020411001	Peptide methionine sulfoxide reductase	0.785761
Cc01_g13220	GSCOC_T00028286001	E3 ubiquitin- ligase RING1	0.785745
Cc02_g13400	GSCOC_T00029162001	Lipoxygenase chloroplastic	0.784642
Cc00_g03680	GSCOC_T00001299001	Leucine-rich repeat receptor-like tyrosine- kinase PXC3	0.784493
Cc05_g10580	GSCOC_T00021424001	Mitogen-activated kinase 19	0.784297
Cc08_g00330	GSCOC_T00005592001	Tetratricopeptide repeat 1	0.783902
Cc02_g30840	GSCOC_T00023837001	Uncharacterized protein	0.78335
Cc02_g06640	GSCOC_T00039206001	yippee-like	0.783092
Cc02_g17850	GSCOC_T00014313001	Minor allergen Alt a 7	0.78287
Cc10_g02730	GSCOC_T00024780001	homolog subfamily C member 2	0.782608
Cc07_g05150	GSCOC_T00039779001	elongation of fatty acids DDB_G0272012	0.782125
Cc02_g21750	GSCOC_T00014820001	Non-specific lipid-transfer At5g64080	0.781419
Cc07_g04990	GSCOC_T00039760001	Probable isoprenylcysteine alpha-carbonyl methylesterase ICMEL2	0.780788
Cc04_g04700	GSCOC_T00022203001	Uncharacterized protein	0.780582
Cc06_g09070	GSCOC_T00041969001	3-ketoacyl- synthase 11	0.78009
Cc06_g11390	GSCOC_T00041665001	Beta-galactosidase 1	0.77994
Cc07_g13000	GSCOC_T00036804001	Uncharacterized protein	0.779659
Cc04_g05450	GSCOC_T00022297001	ABC transporter I family member 17	0.77935
Cc02_g06310	GSCOC_T00039158001	Vinorine synthase	0.779191
Cc08_g05690	GSCOC_T00024356001	Polyubiquitin	0.77874
Cc02_g34690	GSCOC_T00000730001	Uncharacterized protein	0.778511
Cc03_g04310	GSCOC_T00026141001	Probable arginine N-methyltransferase 3	0.778447
Cc07_g02070	GSCOC_T00039387001	Universal stress A	0.778054
Cc08_g15720	GSCOC_T00035513001	Uncharacterized protein	0.777943
Cc11_g10010	GSCOC_T00032640001	Uncharacterized protein	0.777864
Cc06_g05740	GSCOC_T00043139001	Iron-sulfur assembly -like mitochondrial	0.777525
Cc10_g05500	GSCOC_T00034799001	Uncharacterized protein C757.02c	0.777081
Cc01_g02420	GSCOC_T00009711001	Non-specific lipid transfer GPI-anchored 1	0.776394
Cc09_g02780	GSCOC_T00017630001	S-adenosylmethionine mitochondrial carrier	0.775509
Cc03_g08340	GSCOC_T00033238001	Nuclear migration nudC	0.774772
Cc05_g01020	GSCOC_T00000794001	disease resistance RGA1	0.774358
Cc09_g00810	GSCOC_T00017901001	F-box CPR1	0.773865
Cc02_g15170	GSCOC_T00013955001	CBL-interacting serine threonine- kinase 19	0.773533
Cc02_g28570	GSCOC_T00009443001	Probable pyridoxal 5 -phosphate synthase subunit PDX1	0.77308
Cc08_g16290	GSCOC_T00035584001	RNA polymerase II transcriptional coactivator KELP	0.77178
Cc06_g17100	GSCOC_T00012653001	Magnesium-chelatase subunit H	0.770314
Cc09_g08940	GSCOC_T00023137001	Cyclin-dependent kinase B1-2	0.770257
Cc10_g11850	GSCOC_T00031862001	Long chain acyl- synthetase chloroplastic	0.769953
Cc04_g03030	GSCOC_T00021990001	Homeobox-leucine zipper GLABRA 2	0.769701
Cc01_g15480	GSCOC_T00016556001	KH domain-containing At2g38610	0.769329
Cc07_g07300	GSCOC_T00040072001	Bifunctional uridylyltransferase uridylyl-removing enzyme	0.769272
Cc08_g15360	GSCOC_T00035465001	Respiratory burst oxidase homolog A	0.768434
Cc00_g18540	GSCOC_T00008824001	Cytochrome P450 71A4	0.768429
Cc07_g15170	GSCOC_T00036510001	Ras-related RABH1e	0.767566
Cc03_g08600	GSCOC_T00033288001	MDIS1-interacting receptor like kinase 2	0.766607
Cc04_g00940	GSCOC_T00021722001	Uncharacterized protein	0.766568
Cc01_g17430	GSCOC_T00016325001	Transcription factor PIF1	0.764908
Cc04_g16390	GSCOC_T00035731001	(-)-germacrene D synthase	0.764784
Cc02_g18110	GSCOC_T00014346001	Uncharacterized protein	0.764733
Cc03_g00010	GSCOC_T00025571001	Uncharacterized protein	0.764307
Cc04_g00270	GSCOC_T00021630001	F-box kelch-repeat At1g51550	0.763954
Cc07_g03880	GSCOC_T00039636001	E3 ubiquitin- ligase KEG	0.763365
Cc05_g03130	GSCOC_T00033505001	Endoglucanase 11	0.761724
Cc10_g11560	GSCOC_T00001424001	Uncharacterized protein	0.761632
Cc06_g15660	GSCOC_T00030791001	E3 ubiquitin- ligase SINAT2	0.759346
Cc08_g00300	GSCOC_T00005588001	Uncharacterized protein	0.759209
Cc10_g00650	GSCOC_T00024522001	Uncharacterized protein	0.758433
Cc01_g19820	GSCOC_T00016007001	Uncharacterized protein	0.758196
Cc06_g00310	GSCOC_T00023205001	Serine threonine- kinase chloroplastic	0.75661
Cc10_g08850	GSCOC_T00034331001	Metallothionein 1	0.756323
Cc04_g04820	GSCOC_T00022221001	Uncharacterized protein	0.756218
Cc08_g00740	GSCOC_T00038473001	Ethylene-responsive transcription factor SHINE 3	0.756093
Cc00_g09820	GSCOC_T00002169001	Disease resistance RPM1	0.755175
Cc06_g07230	GSCOC_T00031290001	Multiple C2 and transmembrane domain-containing 2	0.754133
Cc06_g08410	GSCOC_T00031135001	Uncharacterized protein	0.754105
Cc10_g07250	GSCOC_T00034546001	Uncharacterized protein	0.753624
Cc06_g00510	GSCOC_T00023230001	U-box domain-containing 16	0.753353
Cc06_g01590	GSCOC_T00023382001	GDP-mannose-dependent alpha-mannosyltransferase	0.753257
Cc10_g15940	GSCOC_T00033799001	Shikimate O-hydroxycinnamoyltransferase	0.752998
Cc05_g09570	GSCOC_T00021566001	Two pore potassium channel c	0.752943
Cc06_g08480	GSCOC_T00031126001	Alpha-amylase isozyme 3E	0.752377
Cc07_g07540	GSCOC_T00040104001	Homeobox-leucine zipper HAT22	0.752121
Cc04_g05170	GSCOC_T00022262001	Proline-rich receptor kinase PERK15	0.75209
Cc05_g01850	GSCOC_T00015775001	GEM 5	0.75139
Cc08_g02300	GSCOC_T00037696001	Ribose-phosphate pyrophosphokinase chloroplastic	0.751255
Cc02_g01920	GSCOC_T00020030001	Solute carrier family 25 member 39	0.750513
Cc02_g12110	GSCOC_T00029331001	G-type lectin S-receptor-like serine threonine- kinase SD1-29	0.75035
Cc11_g17220	GSCOC_T00038282001	Uncharacterized protein	0.749008
Cc09_g00770	GSCOC_T00017906001	Inositol monophosphatase 3	0.748766
Cc03_g01990	GSCOC_T00025834001	Alanine--tRNA ligase	0.747483
Cc07_g03600	GSCOC_T00039603001	SPX domain-containing 4	0.746727
Cc11_g08700	GSCOC_T00032838001	Uncharacterized protein	0.74654
Cc02_g00890	GSCOC_T00019890001	Nucleolin 2	0.746347
Cc05_g04100	GSCOC_T00031590001	Cell division control 2 homolog D	0.745819
Cc11_g17100	GSCOC_T00038267001	Agamous-like MADS-box AGL31	0.745649
Cc02_g21700	GSCOC_T00014815001	Uncharacterized protein	0.74563
Cc06_g07300	GSCOC_T00031281001	Double-stranded RNA-binding 4	0.745053
Cc11_g13350	GSCOC_T00032191001	Probable serine threonine- kinase PBL3	0.743343
Cc09_g03330	GSCOC_T00017563001	Interferon-induced GTP-binding Mx2	0.74328
Cc02_g36110	GSCOC_T00042748001	Nuclear pore complex Nup98-Nup96	0.743207
Cc06_g08310	GSCOC_T00031148001	Axial regulator YABBY 5	0.742688
Cc02_g16450	GSCOC_T00014135001	Uncharacterized protein	0.742548
Cc01_g20770	GSCOC_T00005062001	Phytochrome A-associated F-box	0.74241
Cc04_g02070	GSCOC_T00021874001	PRA1 family F2	0.742142
Cc03_g00570	GSCOC_T00025640001	Uncharacterized protein	0.741319
Cc08_g16160	GSCOC_T00035568001	UDP-glucose 4-epimerase GEPI48	0.741191
Cc01_g03750	GSCOC_T00040933001	Cytochrome P450 81D1	0.740866
Cc07_g13130	GSCOC_T00036783001	Receptor kinase TMK1	0.739675
Cc10_g01330	GSCOC_T00024604001	FD	0.739332
Cc00_g00850	GSCOC_T00041131001	TMV resistance N	0.739127
Cc00_g03090	GSCOC_T00003064001	Uncharacterized protein	0.738881
Cc07_g04950	GSCOC_T00039756001	Uncharacterized protein	0.738855
Cc10_g15850	GSCOC_T00033786001	MADS-box SVP	0.737688
Cc02_g03020	GSCOC_T00020172001	Remorin	0.737363
Cc06_g05490	GSCOC_T00043102001	Monodehydroascorbate reductase	0.736953
Cc08_g16330	GSCOC_T00035590001	Auxin response factor 18	0.736753
Cc03_g07320	GSCOC_T00026577001	Chalcone synthase	0.735789
Cc06_g22730	GSCOC_T00040676001	Probable aquaporin SIP2-1	0.73558
Cc07_g15850	GSCOC_T00036418001	Glutathione hydrolase 1 proenzyme	0.735308
Cc03_g09850	GSCOC_T00030975001	Probable aldo-keto reductase 3	0.734588
Cc08_g12190	GSCOC_T00030515001	Probable glycosyltransferase At5g03795	0.734386
Cc01_g12870	GSCOC_T00028238001	Outer envelope pore chloroplastic	0.73437
Cc05_g10210	GSCOC_T00021488001	9-cis-epoxycarotenoid dioxygenase chloroplastic	0.733889
Cc01_g19490	GSCOC_T00016051001	Uncharacterized protein	0.733559
Cc04_g01150	GSCOC_T00021750001	von Willebrand factor A domain-containing DDB_G0292028	0.733556
Cc03_g07390	GSCOC_T00026589001	Ribonuclease P subunit p25	0.733466
Cc02_g07830	GSCOC_T00029887001	Uncharacterized protein	0.732697
Cc07_g18850	GSCOC_T00018684001	Histone deacetylase 19	0.732119
Cc02_g00320	GSCOC_T00019808001	D-xylose-proton symporter-like 2	0.731679
Cc07_g03340	GSCOC_T00039561001	Uncharacterized protein	0.731566
Cc02_g19960	GSCOC_T00014576001	Cyclin-D4-1	0.730864
Cc01_g04780	GSCOC_T00028526001	Phospholipase A1- chloroplastic	0.730032
Cc10_g15180	GSCOC_T00033686001	Photosystem II 22 kDa chloroplastic	0.729715
Cc02_g38940	GSCOC_T00027788001	Ubiquitin-conjugating enzyme E2 28	0.729455
Cc02_g32240	GSCOC_T00012958001	Vesicle-associated 2-2	0.729373
Cc03_g16170	GSCOC_T00002113001	Potassium transporter 4	0.72924
Cc03_g02690	GSCOC_T00025933001	Uncharacterized protein	0.728944
Cc05_g13290	GSCOC_T00021084001	Polyubiquitin 10	0.728415
Cc03_g06810	GSCOC_T00026501001	Ammonium transporter 1 member 1	0.727776
Cc04_g04690	GSCOC_T00022202001	Xanthoxin dehydrogenase	0.727596
Cc02_g01710	GSCOC_T00020001001	RING-H2 finger ATL21A	0.726395
Cc08_g01610	GSCOC_T00038360001	Probable disease resistance RPP8 4	0.726285
Cc10_g12020	GSCOC_T00031885001	F-box 7	0.72604
Cc04_g04440	GSCOC_T00022169001	E3 ubiquitin- ligase KEG	0.725538
Cc07_g11580	GSCOC_T00036986001	Probable acyl-activating enzyme peroxisomal	0.725136
Cc03_g11230	GSCOC_T00042086001	Uncharacterized protein At3g49140	0.7242
Cc07_g13900	GSCOC_T00036680001	UDP-glycosyltransferase 91A1	0.723878
Cc00_g03210	GSCOC_T00011584001	Uncharacterized protein	0.723776
Cc07_g06440	GSCOC_T00039949001	Probable LRR receptor-like serine threonine- kinase At4g37250	0.723365
Cc05_g08540	GSCOC_T00016878001	Chaperone	0.722781
Cc02_g36380	GSCOC_T00003932001	Blue copper	0.722713
Cc11_g13090	GSCOC_T00032225001	Sphinganine C4-monooxygenase 1	0.722283
Cc10_g10340	GSCOC_T00031426001	BAG family molecular chaperone regulator 3	0.720213
Cc01_g17660	GSCOC_T00016296001	Alcohol dehydrogenase class-3	0.719435
Cc02_g24220	GSCOC_T00015138001	Plasmodesmata-located 8	0.718925
Cc07_g07210	GSCOC_T00040059001	glycosyltransferase 7	0.718515
Cc02_g09150	GSCOC_T00029696001	GDSL esterase lipase At5g33370	0.718338
Cc02_g17100	GSCOC_T00014215001	Uncharacterized protein	0.718046
Cc07_g18080	GSCOC_T00018805001	Probable pectinesterase pectinesterase inhibitor 51	0.71795
Cc11_g06030	GSCOC_T00020585001	Ankyrin repeat-containing ITN1	0.717848
Cc06_g19200	GSCOC_T00028972001	Vesicular inhibitory amino acid transporter	0.717713
Cc11_g08460	GSCOC_T00032872001	WUSCHEL-related homeobox 1	0.716922
Cc02_g06440	GSCOC_T00039178001	PHD finger ALFIN-LIKE 1	0.716517
Cc03_g02740	GSCOC_T00025941001	E3 ubiquitin- ligase RF298	0.716382
Cc06_g08450	GSCOC_T00031130001	SPX domain-containing 2	0.71632
Cc07_g18910	GSCOC_T00018672001	tRNA-dihydrouridine(20 20a) synthase	0.716163
Cc07_g12500	GSCOC_T00036864001	Probable metal-nicotianamine transporter YSL12	0.715158
Cc05_g14580	GSCOC_T00038801001	Kinesin KIF15	0.714883
Cc08_g07360	GSCOC_T00025360001	Premnaspirodiene oxygenase	0.714218
Cc06_g03480	GSCOC_T00023632001	Serine threonine- kinase PBS1	0.713989
Cc08_g14850	GSCOC_T00035395001	Probable aquaporin PIP1-2	0.713386
Cc01_g10810	GSCOC_T00024188001	Receptor 12	0.713302
Cc05_g16510	GSCOC_T00038549001	Uncharacterized protein	0.713048
Cc10_g10300	GSCOC_T00031430001	O-fucosyltransferase 1	0.71266
Cc04_g00090	GSCOC_T00021608001	-related lipid transfer mitochondrial	0.712578
Cc07_g03620	GSCOC_T00039605001	Uncharacterized protein At5g39570	0.710784
Cc09_g00130	GSCOC_T00017988001	ATP-dependent 6-phosphofructokinase 2	0.710572
Cc11_g13540	GSCOC_T00032169001	Homeobox-leucine zipper HAT5	0.710034
Cc11_g09310	GSCOC_T00032753001	Phosphatidylserine synthase 2	0.709183
Cc02_g24230	GSCOC_T00015140001	Auxin-induced X10A	0.708675
Cc02_g39890	GSCOC_T00027645001	3-ketoacyl- synthase 1	0.708561
Cc06_g10450	GSCOC_T00041778001	Uncharacterized protein	0.708242
Cc10_g03480	GSCOC_T00024873001	BEL1-like homeodomain 4	0.707651
Cc00_g25530	GSCOC_T00008670001	L-ascorbate oxidase homolog	0.706767
Cc03_g04590	GSCOC_T00026185001	Uncharacterized protein	0.706704
Cc06_g11460	GSCOC_T00041657001	Uncharacterized protein	0.706049
Cc03_g15910	GSCOC_T00001651001	Ankyrin repeat SKIP35	0.70602
Cc04_g05090	GSCOC_T00022254001	Probable GMP synthas	0.705601
Cc03_g15920	GSCOC_T00001652001	Uncharacterized protein	0.70559
Cc03_g04210	GSCOC_T00026131001	Uncharacterized protein	0.704566
Cc06_g17790	GSCOC_T00040370001	Zeatin O-glucosyltransferase	0.704037
Cc03_g02370	GSCOC_T00025879001	Uncharacterized protein	0.703405
Cc00_g03640	GSCOC_T00008284001	Uncharacterized protein	0.702997
Cc07_g15040	GSCOC_T00036527001	SENSITIVE TO PROTON RHIZOTOXICITY 1	0.702506
Cc07_g08100	GSCOC_T00040173001	Double-stranded RNA-binding 4	0.702211
Cc10_g02320	GSCOC_T00024733001	Thioredoxin H-type 1	0.70188
Cc04_g06840	GSCOC_T00022483001	E3 ubiquitin ligase BIG BROTHER-related	0.701835
Cc09_g04130	GSCOC_T00017463001	Uncharacterized protein	0.700555
Cc06_g21610	GSCOC_T00001546001	2-hydroxymuconate semialdehyde hydrolase	0.700159
Cc04_g00870	GSCOC_T00021714001	GDSL esterase lipase 1	0.699711
Cc03_g09890	GSCOC_T00030979001	Probable aldo-keto reductase 2	0.699345
Cc02_g06430	GSCOC_T00039176001	Leucoanthocyanidin dioxygenase	0.698648
Cc10_g09340	GSCOC_T00031558001	12-oxophytodienoate reductase 2	0.698392
Cc01_g12150	GSCOC_T00028139001	3-ketoacyl- synthase 3	0.698368
Cc08_g14880	GSCOC_T00035399001	Cytochrome P450 86A2	0.697571
Cc01_g10000	GSCOC_T00024079001	Uncharacterized protein	0.697457
Cc01_g05690	GSCOC_T00027381001	Magnesium transporter NIPA2	0.697254
Cc06_g03530	GSCOC_T00023638001	Pentatricopeptide repeat-containing chloroplastic	0.697213
Cc09_g10270	GSCOC_T00041065001	Zeta-carotene desaturase	0.696991
Cc00_g08780	GSCOC_T00007633001	SENSITIVE TO PROTON RHIZOTOXICITY 1	0.696178
Cc08_g06420	GSCOC_T00036027001	Probable WRKY transcription factor 11	0.69585
Cc04_g00500	GSCOC_T00021664001	Mitogen-activated kinase kinase 5	0.695804
Cc10_g10050	GSCOC_T00031463001	Myb family transcription factor APL	0.695791
Cc07_g10250	GSCOC_T00037142001	Uncharacterized protein	0.695476
Cc07_g06060	GSCOC_T00039899001	Lipase	0.69468
Cc10_g02450	GSCOC_T00024747001	Transmembrane 136	0.694054
Cc02_g20150	GSCOC_T00014619001	Inositol-tetrakisphosphate 1-kinase 2	0.693978
Cc06_g03790	GSCOC_T00023675001	NAC transcription factor 29	0.693948
Cc01_g14560	GSCOC_T00028460001	Uncharacterized protein	0.693652
Cc07_g13820	GSCOC_T00036692001	Kinesin KIN-14G	0.693484
Cc02_g00400	GSCOC_T00019817001	Uncharacterized protein	0.69285
Cc02_g34590	GSCOC_T00000716001	DEHYDRATION-INDUCED 19 homolog 3	0.692613
Cc08_g03120	GSCOC_T00037822001	Uncharacterized membrane At4g09580	0.692321
Cc02_g12330	GSCOC_T00029298001	Transcription factor MYB39	0.691614
Cc09_g04520	GSCOC_T00017415001	Uncharacterized protein	0.691014
Cc02_g18890	GSCOC_T00014447001	Thioredoxin chloroplastic	0.690456
Cc08_g07370	GSCOC_T00025362001	Premnaspirodiene oxygenase	0.689803
Cc05_g02000	GSCOC_T00040824001	Probable E3 ubiquitin- ligase RHA1A	0.689451
Cc00_g14640	GSCOC_T00012542001	Squamosa promoter-binding 9	0.689438
Cc08_g16820	GSCOC_T00035657001	Uncharacterized protein	0.68871
Cc02_g21970	GSCOC_T00014849001	Glycine-rich RNA-binding blt801	0.688447
Cc07_g00780	GSCOC_T00019157001	Fidgetin 1	0.687442
Cc02_g15880	GSCOC_T00014054001	Cysteine ase inhibitor 6	0.686778
Cc06_g17270	GSCOC_T00036362001	Histone-lysine N-methyltransferase SETMAR	0.686617
Cc01_g04510	GSCOC_T00041173001	Probable feruloyl esterase A	0.686265
Cc06_g01530	GSCOC_T00023375001	Glycerol-3-phosphate 2-O-acyltransferase 6	0.686142
Cc07_g17860	GSCOC_T00018835001	Uncharacterized WD repeat-containing	0.68574
Cc04_g03420	GSCOC_T00022037001	Uncharacterized protein	0.684837
Cc00_g26750	GSCOC_T00003171001	Anthocyanidin	0.684714
Cc11_g13080	GSCOC_T00032226001	PHYTOCHROME KINASE SUBSTRATE 1	0.684052
Cc11_g14700	GSCOC_T00032022001	Uncharacterized protein At4g28440	0.684046
Cc04_g10610	GSCOC_T00042620001	Uncharacterized protein	0.683941
Cc01_g20020	GSCOC_T00015983001	Histone H2AX	0.683438
Cc05_g12650	GSCOC_T00021162001	ADP-ribosylation factor GTPase-activating AGD5	0.683159
Cc03_g04260	GSCOC_T00026136001		0.682256
Cc09_g00550	GSCOC_T00017933001	Uncharacterized protein	0.68224
Cc00_g17870	GSCOC_T00008904001	Mitogen-activated kinase homolog MMK2	0.68223
Cc07_g09870	GSCOC_T00037188001	Uncharacterized protein	0.68069
Cc08_g15950	GSCOC_T00035541001	Probable polygalacturonase	0.680098
Cc00_g21360	GSCOC_T00011619001	Vesicular inhibitory amino acid transporter	0.679766
Cc07_g06490	GSCOC_T00039959001	Uncharacterized protein	0.679448
Cc02_g03770	GSCOC_T00020270001	K(+) efflux antiporter 5	0.679381
Cc09_g05960	GSCOC_T00033381001	Ankyrin repeat-containing ITN1	0.67883
Cc02_g36580	GSCOC_T00003906001	Probable calcium-binding CML10	0.678751
Cc07_g04600	GSCOC_T00039717001	Alpha beta hydrolase domain-containing 17C	0.676206
Cc04_g15830	GSCOC_T00042369001	Cytochrome heme mitochondrial	0.676056
Cc06_g16970	GSCOC_T00004154001	DETOXIFICATION 42	0.674242
Cc01_g14530	GSCOC_T00028455001	Zinc transporter chloroplastic	0.674145
Cc06_g19190	GSCOC_T00028971001	Vacuolar amino acid transporter 1	0.674114
Cc06_g17660	GSCOC_T00040349001	Heat stress transcription factor B-3	0.673835
Cc01_g16540	GSCOC_T00016429001	GTP cyclohydrolase 1	0.673538
Cc00_g17040	GSCOC_T00008775001	Anthranilate synthase component 2	0.673367
Cc10_g05380	GSCOC_T00034815001	Cytochrome P450 81D1	0.673295
Cc04_g11080	GSCOC_T00037268001	Non-specific lipid-transfer	0.672406
Cc10_g16420	GSCOC_T00013398001	Uncharacterized protein	0.672402
Cc06_g05230	GSCOC_T00043061001	Transcriptional activator DEMETER	0.672364
Cc00_g17180	GSCOC_T00009142001	Activating molecule in BECN1-regulated autophagy 1	0.67213
Cc06_g12140	GSCOC_T00041572001	Uncharacterized protein	0.671756
Cc02_g08490	GSCOC_T00029787001	Sulfate transporter chloroplastic	0.671621
Cc08_g15910	GSCOC_T00035535001	Probable WRKY transcription factor 41	0.671133
Cc08_g05310	GSCOC_T00024284001	Probable urea active transporter 1	0.671036
Cc06_g23520	GSCOC_T00040557001	Activator of 90 kDa heat shock ATPase homolog 1	0.671003
Cc10_g15840	GSCOC_T00033785001	homolog subfamily B member 12	0.670605
Cc10_g15900	GSCOC_T00033794001	Uncharacterized protein	0.670245
Cc11_g05590	GSCOC_T00020517001	LRR receptor-like serine threonine- kinase GSO1	0.669985
Cc02_g00040	GSCOC_T00019778001	RNA polymerase sigma factor	0.668842
Cc00_g07820	GSCOC_T00007023001	Uncharacterized protein	0.668013
Cc10_g07370	GSCOC_T00034532001	TPR repeat-containing thioredoxin TTL1	0.667901
Cc02_g12720	GSCOC_T00029245001	Katanin p80 WD40 repeat-containing subunit B1 homolog	0.667747
Cc04_g04310	GSCOC_T00022154001	Uncharacterized protein	0.667221
Cc02_g34520	GSCOC_T00000703001	Probable phosphatase 2C 73	0.666572
Cc03_g13110	GSCOC_T00030601001	Tetrapyrrole-binding chloroplastic	0.666519
Cc00_g07730	GSCOC_T00002546001	Probable LRR receptor-like serine threonine- kinase At3g47570	0.666453
Cc02_g27300	GSCOC_T00025057001	O-fucosyltransferase 1	0.666264
Cc04_g09440	GSCOC_T00022832001	CMP-N-acetylneuraminate-beta-galactosamide-alpha-	0.666235
Cc06_g03440	GSCOC_T00023627001	Peroxiredoxin-like 2C	0.666008
Cc11_g13450	GSCOC_T00032179001	Hypersensitive-induced response 1	0.665686
Cc05_g05300	GSCOC_T00035097001	Uncharacterized protein	0.665333
Cc10_g10630	GSCOC_T00036015001	Pathogenesis-related 5	0.664482
Cc03_g01060	GSCOC_T00025709001	Acetate butyrate-- ligase peroxisomal	0.664035
Cc10_g11860	GSCOC_T00031863001	Uncharacterized protein	0.663798
Cc07_g03480	GSCOC_T00039580001	Probable calcium-binding CML46	0.663786
Cc07_g03280	GSCOC_T00039554001	Transcription factor bHLH121	0.663711
Cc03_g03720	GSCOC_T00026071001	5 -nucleotidase	0.663627
Cc04_g01500	GSCOC_T00021804001	Solute carrier family 25 member 44	0.662326
Cc02_g00820	GSCOC_T00019879001	Two-component response regulator-like PRR95	0.662325
Cc04_g05140	GSCOC_T00022259001	Multidrug resistance-associated 7	0.662223
Cc08_g02620	GSCOC_T00037740001	Uncharacterized protein	0.661956
Cc07_g06040	GSCOC_T00039896001	Lipase	0.661747
Cc09_g03100	GSCOC_T00017589001	Ubiquitin-NEDD8 RUB1	0.661558
Cc06_g05090	GSCOC_T00043042001	Uncharacterized protein	0.661552
Cc02_g17430	GSCOC_T00014257001	Universal stress A	0.66066
Cc01_g09370	GSCOC_T00023989001	CMP-N-acetylneuraminate-beta-galactosamide-alpha-	0.660484
Cc05_g02200	GSCOC_T00018420001	ATP-dependent zinc metalloprotease FTSH chloroplastic	0.660439
Cc04_g13430	GSCOC_T00018290001	Uncharacterized protein	0.659562
Cc08_g14450	GSCOC_T00030221001	LURP-one-related 11	0.659264
Cc09_g01570	GSCOC_T00017792001	Lactoylglutathione lyase	0.658721
Cc04_g15150	GSCOC_T00002599001	NEP1-interacting -like 2	0.658458
Cc08_g12090	GSCOC_T00030529001	UPF0676	0.658077
Cc02_g22810	GSCOC_T00014959001	Ferredoxin- chloroplastic	0.657579
Cc11_g00610	GSCOC_T00004222001	Glyceraldehyde-3-phosphate dehydrogenase chloroplastic (Fragment)	0.657263
Cc06_g09180	GSCOC_T00041948001	Uncharacterized sodium-dependent transporter	0.656171
Cc05_g13300	GSCOC_T00021079001	translation factor SUI1 homolog	0.656098
Cc05_g07170	GSCOC_T00042242001	Two pore calcium channel 1A	0.65589
Cc07_g12490	GSCOC_T00036865001	Probable metal-nicotianamine transporter YSL12	0.655486
Cc02_g23010	GSCOC_T00014980001	WEB family At1g75720	0.655439
Cc11_g01940	GSCOC_T00033049001	Uncharacterized protein	0.655353
Cc08_g05150	GSCOC_T00042442001	Replication A 70 kDa DNA-binding subunit	0.654583
Cc03_g08900	GSCOC_T00004204001	Uncharacterized protein	0.653477
Cc07_g00730	GSCOC_T00019151001	Chloride channel CLC-b	0.653149
Cc07_g06070	GSCOC_T00039901001	Uncharacterized protein	0.653084
Cc01_g19920	GSCOC_T00015996001	Probable LRR receptor-like serine threonine- kinase RKF3	0.652792
Cc06_g02670	GSCOC_T00023526001	Probable phosphatase 2C 4	0.652693
Cc05_g13050	GSCOC_T00021110001	Organic cation carnitine transporter 4	0.652579
Cc02_g35780	GSCOC_T00042795001	Uncharacterized protein	0.652284
Cc06_g11250	GSCOC_T00041680001	Uncharacterized protein	0.65211
Cc01_g05360	GSCOC_T00027320001	Rho GTPase-activating 24	0.652081
Cc05_g09940	GSCOC_T00021521001	RCC2 homolog	0.650799
Cc10_g15510	GSCOC_T00033733001	Esterase AGAP003155	0.65079
Cc02_g06200	GSCOC_T00039145001	Transcription factor bHLH51	0.650456
Cc04_g01470	GSCOC_T00021800001	Phospholipid:diacylglycerol acyltransferase 1	0.649947
Cc11_g04340	GSCOC_T00001355001	Uncharacterized protein	0.649282
Cc02_g08480	GSCOC_T00029788001	Metal tolerance 5	0.649269
Cc08_g07800	GSCOC_T00011874001	Uncharacterized protein	0.649105
Cc06_g02340	GSCOC_T00023488001	Uncharacterized protein	0.649072
Cc00_g28700	GSCOC_T00007394001	F-box PP2-B10	0.648905
Cc00_g17700	GSCOC_T00007786001	Pentatricopeptide repeat-containing At5g25630	0.648895
Cc08_g16280	GSCOC_T00035583001	Uncharacterized protein	0.648737
Cc05_g12750	GSCOC_T00021150001	Uncharacterized protein	0.647412
Cc01_g12250	GSCOC_T00028155001	RING-H2 finger ATL2	0.647218
Cc01_g18030	GSCOC_T00016253001	Tetratricopeptide repeat 7A	0.646963
Cc02_g19080	GSCOC_T00014472001	Uncharacterized protein	0.646767
Cc10_g05620	GSCOC_T00034786001	Uncharacterized protein	0.646377
Cc02_g20130	GSCOC_T00014616001	Pyruvate kinase isozyme chloroplastic	0.646376
Cc09_g00930	GSCOC_T00017881001	Mavicyanin	0.646168
Cc10_g00560	GSCOC_T00024511001	NLP2	0.646081
Cc02_g20990	GSCOC_T00014728001	Uncharacterized protein	0.646065
Cc10_g10020	GSCOC_T00031467001	Transcription factor bHLH80	0.645609
Cc02_g20970	GSCOC_T00014722001	Carbonic chloroplastic	0.644738
Cc02_g07400	GSCOC_T00029946001	BTB POZ and MATH domain-containing 3	0.644728
Cc06_g06870	GSCOC_T00031331001	Uncharacterized protein	0.64467
Cc05_g12760	GSCOC_T00021149001	Vesicle-associated 4-1	0.644577
Cc02_g12440	GSCOC_T00029283001	F-box At1g61340	0.644271
Cc04_g09070	GSCOC_T00022784001	NRDE2 homolog	0.644243
Cc08_g09820	GSCOC_T00026933001	Monoglyceride lipase	0.64401
Cc00_g21580	GSCOC_T00006599001	Glycine-rich	0.643894
Cc05_g11840	GSCOC_T00021264001	Probable phosphatase 2C 39	0.643872
Cc02_g01070	GSCOC_T00019915001	Uncharacterized protein	0.643692
Cc01_g20890	GSCOC_T00005047001	Blue-light photoreceptor PHR2	0.643323
Cc01_g20290	GSCOC_T00015951001	Uncharacterized protein	0.643028
Cc09_g09550	GSCOC_T00004074001	Glucan endo-	0.642908
Cc02_g24630	GSCOC_T00028860001	F-box At5g07670	0.642414
Cc03_g10020	GSCOC_T00031001001	Pre-mRNA-splicing factor 18	0.64236
Cc10_g02830	GSCOC_T00024792001	Cytosolic purine 5 -nucleotidase	0.642308
Cc10_g07180	GSCOC_T00034556001	Uncharacterized protein	0.642291
Cc03_g09430	GSCOC_T00012901001	Glycerophosphodiester periplasmic	0.641992
Cc05_g10030	GSCOC_T00021509001	Kinesin KIN-14G	0.641822
Cc00_g11520	GSCOC_T00012350001	STRUBBELIG-RECEPTOR FAMILY 3	0.641755
Cc05_g08380	GSCOC_T00016856001	Uncharacterized protein	0.641455
Cc11_g11260	GSCOC_T00032469001	Uncharacterized protein	0.63991
Cc08_g06760	GSCOC_T00005814001	DNA topoisomerase 2-binding 1-A	0.639654
Cc07_g01940	GSCOC_T00039372001	Glutaredoxin-C2	0.6392
Cc11_g10910	GSCOC_T00032513001	Phosphate transporter PHO1 homolog 1	0.639128
Cc04_g00100	GSCOC_T00021609001	Uncharacterized protein	0.638757
Cc02_g02020	GSCOC_T00020045001	Hydroxyproline O-galactosyltransferase HPGT1	0.638004
Cc02_g13210	GSCOC_T00029186001	Uncharacterized protein	0.637806
Cc11_g15570	GSCOC_T00038073001	Ribose-phosphate pyrophosphokinase mitochondrial	0.637704
Cc04_g01800	GSCOC_T00021840001	5 -nucleotidase	0.637659
Cc08_g09040	GSCOC_T00017243001	Aspartate cytoplasmic	0.637579
Cc01_g12500	GSCOC_T00028187001	Uncharacterized protein	0.637517
Cc09_g01060	GSCOC_T00017862001	Uncharacterized protein	0.63743
Cc07_g01320	GSCOC_T00019225001	Cytochrome b-c1 complex subunit mitochondrial	0.637337
Cc11_g14480	GSCOC_T00032053001	Potassium transporter 6	0.636782
Cc01_g16970	GSCOC_T00016378001	Sec14 cytosolic factor	0.636248
Cc06_g09060	GSCOC_T00041970001	Probable histone H2A variant 3	0.636211
Cc11_g09060	GSCOC_T00032793001	E3 ubiquitin- ligase MARCH6	0.635768
Cc06_g16960	GSCOC_T00004153001	Zinc finger CCCH domain-containing 30	0.635372
Cc02_g14590	GSCOC_T00013872001	GDSL esterase lipase At5g45910	0.635255
Cc11_g13630	GSCOC_T00032158001	Thioredoxin H2	0.635251
Cc09_g00530	GSCOC_T00017935001	Uncharacterized protein	0.634894
Cc01_g19300	GSCOC_T00016079001	Uncharacterized protein	0.634415
Cc02_g37390	GSCOC_T00027995001	Shaggy-related kinase theta	0.634227
Cc00_g29270	GSCOC_T00002467001	Werner Syndrome-like exonuclease	0.634019
Cc04_g05510	GSCOC_T00022309001	4-coumarate-- ligase 1	0.633413
Cc07_g08590	GSCOC_T00040238001	LEAF RUST 10 DISEASE-RESISTANCE LOCUS RECEPTOR-LIKE PROTEIN KINASE-like	0.633315
Cc10_g13680	GSCOC_T00035251001	NAD(P)H-quinone oxidoreductase subunit chloroplastic	0.631974
Cc11_g15850	GSCOC_T00038111001	Uncharacterized protein	0.631479
Cc08_g04410	GSCOC_T00034266001	Uncharacterized protein	0.631451
Cc06_g01610	GSCOC_T00023388001	Transcription factor MYB1R1	0.63105
Cc04_g14150	GSCOC_T00035944001	Dof zinc finger	0.63083
Cc05_g09690	GSCOC_T00021550001	GDSL esterase lipase At4g10955	0.630495
Cc02_g07610	GSCOC_T00029914001	Uncharacterized protein	0.630434
Cc00_g11930	GSCOC_T00012258001	Uncharacterized protein	0.629459
Cc03_g09860	GSCOC_T00030976001	late blight resistance homolog R1A-6	0.628762
Cc11_g13280	GSCOC_T00032202001	vip1	0.628515
Cc04_g10890	GSCOC_T00042664001	MDIS1-interacting receptor like kinase 1	0.627835
Cc08_g15790	GSCOC_T00035522001	Mitochondrial substrate carrier family B	0.627706
Cc08_g16990	GSCOC_T00035678001	-related lipid transfer mitochondrial	0.627686
Cc07_g07120	GSCOC_T00040049001	ADP-ribosylation factor 8A	0.627376
Cc01_g18950	GSCOC_T00016126001	2-methyl-6-phytyl-	0.627161
Cc02_g01620	GSCOC_T00019989001	Probable pectinesterase pectinesterase inhibitor 34	0.627002
Cc06_g03520	GSCOC_T00023637001	E3 ubiquitin- ligase UPL4	0.626655
Cc00_g32030	GSCOC_T00008801001	Chalcone synthase E	0.626486
Cc07_g14850	GSCOC_T00036561001	F-box FBW2	0.625816
Cc02_g10080	GSCOC_T00029568001	Cytochrome P450 77A2	0.625518
Cc09_g06140	GSCOC_T00033357001	Glutathionyl-hydroquinone reductase	0.625376
Cc00_g18440	GSCOC_T00011147001	G-type lectin S-receptor-like serine threonine- kinase B120	0.625201
Cc09_g00890	GSCOC_T00017886001	Acyl- --sterol O-acyltransferase 1	0.625042
Cc05_g09280	GSCOC_T00002650001	Uncharacterized protein	0.624477
Cc01_g13740	GSCOC_T00028351001	Helicase SKI2W	0.623513
Cc11_g15060	GSCOC_T00001022001	Trihelix transcription factor GT-2	0.623017
Cc03_g03790	GSCOC_T00026079001	Uncharacterized protein	0.622975
Cc01_g09970	GSCOC_T00024074001	Bifunctional polymyxin resistance	0.622658
Cc06_g09920	GSCOC_T00041851001	lin-54 homolog	0.622623
Cc05_g15980	GSCOC_T00038619001	Uncharacterized protein	0.621952
Cc06_g14820	GSCOC_T00030915001	Uncharacterized protein	0.621783
Cc07_g04220	GSCOC_T00039674001	Serine carboxypeptidase-like 25	0.621565
Cc04_g10010	GSCOC_T00042535001	CBS domain-containing CBSCBSPB4	0.621338
Cc01_g17180	GSCOC_T00016355001	CLAVATA3 ESR (CLE)-related TDIF	0.621252
Cc03_g01950	GSCOC_T00025828001	Uncharacterized protein	0.620955
Cc05_g12720	GSCOC_T00021155001	Chlorophyll a-b binding chloroplastic	0.620309
Cc00_g04770	GSCOC_T00006387001	Cryptochrome chloroplastic mitochondrial	0.618811
Cc07_g14720	GSCOC_T00036575001	1-aminocyclopropane-1-carboxylate oxidase 2	0.618387
Cc02_g04040	GSCOC_T00020307001	Uncharacterized protein	0.617596
Cc06_g16040	GSCOC_T00030744001	Uncharacterized protein	0.617316
Cc11_g11620	GSCOC_T00032421001	Cytochrome P450 734A1	0.617173
Cc02_g10630	GSCOC_T00029508001	NAC domain-containing 78	0.616765
Cc06_g18970	GSCOC_T00028937001	Uncharacterized protein	0.616356
Cc10_g09760	GSCOC_T00031503001	NRT1 PTR FAMILY	0.615547
Cc06_g04100	GSCOC_T00023717001	OTU domain-containing DDB_G0284757	0.615543
Cc09_g02910	GSCOC_T00017614001	Uncharacterized protein	0.615228
Cc00_g26380	GSCOC_T00002569001	Probable carboxylesterase 1	0.614531
Cc02_g07560	GSCOC_T00029921001	E3 ubiquitin- ligase RING1	0.614228
Cc10_g00910	GSCOC_T00024551001	L-ascorbate oxidase homolog	0.614159
Cc08_g15210	GSCOC_T00035448001	late blight resistance homolog R1A-3	0.614123
Cc06_g14470	GSCOC_T00041253001	Clustered mitochondria homolog	0.612901
Cc02_g22970	GSCOC_T00014976001	EI24 homolog	0.612855
Cc03_g16110	GSCOC_T00002122001	Cellulose synthase D5	0.612748
Cc01_g12920	GSCOC_T00028245001	Probable serine threonine- kinase PBL9	0.61233
Cc02_g05970	GSCOC_T00039118001	Dehydration-responsive element-binding 2C	0.611865
Cc08_g01300	GSCOC_T00038405001	Uncharacterized protein	0.611742
Cc02_g02720	GSCOC_T00020135001	Uncharacterized protein At3g49055	0.611512
Cc07_g00390	GSCOC_T00019110001	Serine threonine phosphatase 2A 59 kDa regulatory subunit B eta isoform	0.611101
Cc08_g01020	GSCOC_T00038438001	2-hydroxymuconate semialdehyde hydrolase	0.611087
Cc06_g04650	GSCOC_T00042980001	UDP-glycosyltransferase 73C4	0.610727
Cc09_g00790	GSCOC_T00017904001	Cysteine ase inhibitor 1	0.610662
Cc09_g03980	GSCOC_T00017480001	Endoribonuclease Dicer homolog 2	0.610358
Cc08_g10530	GSCOC_T00027021001	Histone deacetylase 2	0.609008
Cc01_g13540	GSCOC_T00028322001	Uncharacterized protein	0.608978
Cc02_g18080	GSCOC_T00014341001	CASP 5C2	0.608976
Cc08_g00670	GSCOC_T00038484001	EIN3-binding F-box 1	0.608783
Cc07_g00540	GSCOC_T00019131001	Uncharacterized protein	0.608661
Cc01_g16350	GSCOC_T00016453001	Serine threonine- kinase OXI1	0.608421
Cc06_g06230	GSCOC_T00031409001	Mitochondrial proton calcium exchanger	0.608419
Cc03_g00630	GSCOC_T00025649001	Galactokinase	0.6081
Cc10_g04710	GSCOC_T00034903001	Ethylene-responsive transcription factor ERF011	0.607866
Cc02_g36760	GSCOC_T00003882001	Glutathione S-transferase zeta class	0.607673
Cc00_g32770	GSCOC_T00009826001	Heterodimeric geranylgeranyl pyrophosphate synthase small chloroplastic	0.607608
Cc02_g13190	GSCOC_T00029188001	Uncharacterized protein	0.607582
Cc06_g13280	GSCOC_T00041419001	Syntaxin-61	0.60735
Cc07_g13400	GSCOC_T00036741001	Uncharacterized protein	0.607304
Cc10_g06770	GSCOC_T00034614001	Uncharacterized protein	0.607097
Cc02_g34210	GSCOC_T00000657001	Serine arginine-rich-splicing factor SR34	0.606695
Cc09_g10260	GSCOC_T00041066001	Uncharacterized protein	0.605821
Cc07_g03630	GSCOC_T00039606001	Uncharacterized protein	0.605299
Cc04_g10310	GSCOC_T00042577001	Non-hemolytic phospholipase C	0.605242
Cc10_g15010	GSCOC_T00033663001	Cellulose synthase A catalytic subunit	0.604552
Cc06_g08120	GSCOC_T00031170001	Uncharacterized protein	0.604477
Cc11_g17280	GSCOC_T00038290001	Bifunctional uridylyltransferase uridylyl-removing enzyme	0.604467
Cc05_g00030	GSCOC_T00017016001	Gamma aminobutyrate transaminase chloroplastic	0.604401
Cc07_g04450	GSCOC_T00039701001	Agamous-like MADS-box AGL8 homolog	0.603906
Cc02_g23490	GSCOC_T00015047001	Chloride channel CLC-c	0.603121
Cc02_g39030	GSCOC_T00027775001	Mitochondrial substrate carrier family B	0.602291
Cc02_g38470	GSCOC_T00027858001	C-terminal binding AN	0.602179
Cc08_g02990	GSCOC_T00037803001	Bifunctional dihydroflavonol 4-reductase flavanone 4-reductase	0.601837
Cc06_g00540	GSCOC_T00023234001	Prosaposin	0.601558
Cc02_g18160	GSCOC_T00014352001	Guanine nucleotide-binding alpha-1 subunit	0.601022
Cc10_g06410	GSCOC_T00034663001	Ras-related Rab7	0.600924
Cc00_g25380	GSCOC_T00010259001	Reticuline oxidase	0.60057
Cc07_g07240	GSCOC_T00040065001	glycosyltransferase 7	0.600255
Cc01_g09570	GSCOC_T00024017001	Serine threonine- kinase KIPK1	0.600057
Cc00_g28550	GSCOC_T00006004001	Uncharacterized protein	0.599694
Cc07_g17470	GSCOC_T00037426001	G-type lectin S-receptor-like serine threonine- kinase RLK1	0.599567
Cc02_g13060	GSCOC_T00029205001	Probable LRR receptor-like serine threonine- kinase At1g56140	0.599418
Cc02_g38060	GSCOC_T00027911001	U-box domain-containing 33	0.599269
Cc02_g00050	GSCOC_T00019779001	Uncharacterized protein	0.599059
Cc02_g26910	GSCOC_T00025000001	Uncharacterized protein	0.599048
Cc02_g39050	GSCOC_T00027772001	Jasmonoyl--L-amino acid synthetase JAR1	0.598395
Cc09_g09750	GSCOC_T00011978001	Uncharacterized protein	0.59817
Cc01_g13580	GSCOC_T00028328001	17.5 kDa class I heat shock	0.597769
Cc07_g06470	GSCOC_T00039956001	Mortality factor 4 1	0.59772
Cc05_g14220	GSCOC_T00038848001	Ethylene-responsive transcription factor 3	0.597491
Cc09_g06520	GSCOC_T00005103001	AP2-like ethylene-responsive transcription factor At2g41710	0.597089
Cc02_g19990	GSCOC_T00014579001	Uncharacterized protein	0.596826
Cc10_g03070	GSCOC_T00024826001	Probable serine threonine- kinase DDB_G0272282	0.596769
Cc02_g06180	GSCOC_T00039143001	UDP-sugar pyrophosphorylase	0.596536
Cc06_g07360	GSCOC_T00031273001	Sugar transport 7	0.596406
Cc01_g13410	GSCOC_T00028307001	Methylsterol monooxygenase 2-2	0.596193
Cc10_g16040	GSCOC_T00033814001	Reticuline oxidase	0.595643
Cc06_g07240	GSCOC_T00031288001	Inhibitor of Bruton tyrosine kinase	0.595173
Cc10_g03620	GSCOC_T00024893001	Proline-rich receptor kinase PERK8	0.595039
Cc06_g01780	GSCOC_T00023411001	Probable sugar phosphate phosphate translocator At3g11320	0.59388
Cc06_g06560	GSCOC_T00031368001	Uncharacterized protein	0.593518
Cc06_g04790	GSCOC_T00043002001	homolog subfamily C member 28	0.593455
Cc11_g17240	GSCOC_T00038285001	Uncharacterized protein	0.59336
Cc08_g13040	GSCOC_T00030391001	Hsp70-Hsp90 organizing 1	0.593066
Cc03_g08180	GSCOC_T00033213001	UPF0481 At3g47200	0.592455
Cc08_g07400	GSCOC_T00025366001	Premnaspirodiene oxygenase	0.592406
Cc06_g14990	GSCOC_T00030896001	Uncharacterized protein	0.592212
Cc05_g04020	GSCOC_T00031577001	Premnaspirodiene oxygenase	0.591919
Cc02_g38810	GSCOC_T00027807001	F-box kelch-repeat At3g61590	0.591633
Cc03_g02580	GSCOC_T00025912001	Squamosa promoter-binding 7	0.590849
Cc09_g01130	GSCOC_T00017851001	Light-induced chloroplastic	0.590491
Cc10_g10380	GSCOC_T00010105001	Calcium-dependent kinase 11	0.58982
Cc08_g14890	GSCOC_T00035403001	BTB POZ domain-containing At5g41330	0.588972
Cc02_g03300	GSCOC_T00020209001	IQ-DOMAIN 31	0.588879
Cc02_g06930	GSCOC_T00039247001	Coronatine-insensitive 1	0.588316
Cc06_g06220	GSCOC_T00031412001	F-box At3g44326	0.588298
Cc11_g07040	GSCOC_T00018115001	Nudix hydrolase mitochondrial	0.588081
Cc01_g18000	GSCOC_T00016256001	Uncharacterized protein	0.587982
Cc07_g16030	GSCOC_T00037616001	Uncharacterized protein sll1770	0.587631
Cc09_g09640	GSCOC_T00004085001	pterin-4-alpha-carbinolamine dehydratase	0.587575
Cc10_g04460	GSCOC_T00034931001	SERAC1	0.586926
Cc08_g14250	GSCOC_T00030247001	Thaumatin	0.586019
Cc01_g07860	GSCOC_T00015461001	YABBY 2	0.585843
Cc08_g10300	GSCOC_T00026994001	Uncharacterized protein	0.585737
Cc11_g10110	GSCOC_T00032622001	Uncharacterized protein	0.584992
Cc02_g06400	GSCOC_T00039173001	Omega-3 fatty acid chloroplastic	0.584959
Cc07_g03760	GSCOC_T00039621001	Chorismate mutase chloroplastic	0.584672
Cc06_g06380	GSCOC_T00031390001	Uncharacterized protein	0.584632
Cc07_g11860	GSCOC_T00036947001	Syntaxin-binding 5-like	0.584527
Cc08_g15460	GSCOC_T00035477001	Uncharacterized protein	0.584368
Cc06_g20400	GSCOC_T00022970001	Cysteine ase inhibitor 6	0.58411
Cc05_g11990	GSCOC_T00021246001	Xylosyltransferase 2	0.584007
Cc02_g31760	GSCOC_T00027497001	DNA damage-repair toleration DRT102	0.583739
Cc02_g05390	GSCOC_T00039046001	Chalcone--flavonone isomerase	0.583487
Cc07_g01090	GSCOC_T00019194001	Glycerophosphocholine phosphodiesterase GDE1	0.583466
Cc08_g14860	GSCOC_T00035396001	Short-chain dehydrogenase TIC chloroplastic	0.583452
Cc11_g15710	GSCOC_T00038089001	ABC transporter B family member chloroplastic	0.583185
Cc10_g04780	GSCOC_T00034893001	Uncharacterized protein	0.583139
Cc05_g06700	GSCOC_T00042174001	Jasmonoyl--L-amino acid synthetase	0.58282
Cc08_g06700	GSCOC_T00005858001	TIC chloroplastic	0.582289
Cc06_g07730	GSCOC_T00031223001	SRG1	0.582206
Cc08_g01050	GSCOC_T00038435001	Uncharacterized protein	0.58156
Cc03_g02930	GSCOC_T00025966001	Uncharacterized protein	0.580964
Cc06_g10980	GSCOC_T00041710001	F-box LRR-repeat At4g29420	0.580823
Cc06_g03010	GSCOC_T00023571001	Soluble inorganic pyrophosphatase	0.580638
Cc11_g05030	GSCOC_T00020441001	Probable L-type lectin-domain containing receptor kinase	0.580589
Cc07_g00310	GSCOC_T00019099001	Cystinosin homolog	0.580015
Cc02_g19270	GSCOC_T00014491001	Cinnamyl alcohol dehydrogenase 1	0.579378
Cc04_g07850	GSCOC_T00022623001	2-aminoethanethiol dioxygenase	0.578893
Cc00_g18360	GSCOC_T00005498001	TLD domain-containing 1	0.578406
Cc03_g09610	GSCOC_T00030945001	UDP-glycosyltransferase 76E2	0.578051
Cc05_g10930	GSCOC_T00021380001	DNA polymerase delta subunit 3	0.57801
Cc01_g11930	GSCOC_T00028109001	Phototropin-1	0.577819
Cc01_g18880	GSCOC_T00016142001	Transcription factor UNE12	0.577743
Cc03_g03170	GSCOC_T00025996001	Dual specificity phosphatase 1B	0.577579
Cc10_g09580	GSCOC_T00031525001	Cysteine ase inhibitor 5	0.577399
Cc05_g11510	GSCOC_T00021307001	Homogentisate	0.577399
Cc10_g08720	GSCOC_T00034351001	Phospholipase DDHD1	0.57719
Cc00_g13410	GSCOC_T00003236001	Receptor kinase FERONIA	0.577088
Cc11_g04990	GSCOC_T00020432001	Receptor kinase FERONIA	0.576875
Cc06_g09120	GSCOC_T00041956001	argonaute PNH1	0.57657
Cc03_g04110	GSCOC_T00026118001	Serine threonine tyrosine- kinase HT1	0.57624
Cc07_g03460	GSCOC_T00039575001	Uncharacterized protein At5g19025	0.575124
Cc08_g07860	GSCOC_T00011881001	WRKY transcription factor 18	0.574906
Cc04_g15850	GSCOC_T00042372001	Pentatricopeptide repeat-containing At1g18900	0.573338
Cc01_g16010	GSCOC_T00016493001	Calmodulin 3	0.573324
Cc01_g15040	GSCOC_T00016612001	Uncharacterized protein	0.572471
Cc01_g16360	GSCOC_T00016452001	Uncharacterized HIT SSO2163	0.572286
Cc09_g02130	GSCOC_T00017715001	Monoglyceride lipase	0.57213
Cc10_g03470	GSCOC_T00024872001	BEL1-like homeodomain 4	0.571984
Cc00_g12160	GSCOC_T00012514001	Caffeic acid 3-O-methyltransferase	0.571943
Cc08_g16130	GSCOC_T00035564001	Nucleoside diphosphate kinase chloroplastic mitochondrial	0.571794
Cc01_g14380	GSCOC_T00028436001	Gibberellin 2-beta-dioxygenase 8	0.571512
Cc10_g15460	GSCOC_T00033726001	Probable glutathione S-transferase	0.571162
Cc03_g00420	GSCOC_T00025623001	Probable phosphatase 2C 49	0.570999
Cc09_g01270	GSCOC_T00017834001	STRUBBELIG-RECEPTOR FAMILY 8	0.570479
Cc04_g03230	GSCOC_T00022016001	Pyridoxal 5 -phosphate synthase subunit	0.569791
Cc11_g14560	GSCOC_T00032042001	Probable xyloglucan endotransglucosylase hydrolase 33	0.569385
Cc08_g13520	GSCOC_T00030335001	Transmembrane 64	0.568925
Cc02_g06420	GSCOC_T00039175001	Zinc finger CCCH domain-containing 29	0.568229
Cc00_g27350	GSCOC_T00012547001	Elongation factor chloroplastic	0.568189
Cc02_g18090	GSCOC_T00014344001	RING-H2 finger ATL65	0.567849
Cc09_g09230	GSCOC_T00023078001	Uncharacterized protein At2g3446	0.567749
Cc07_g03780	GSCOC_T00039624001	UPF0301 Plut_0637	0.567602
Cc08_g15480	GSCOC_T00035480001	Uncharacterized protein	0.567544
Cc03_g05720	GSCOC_T00026337001	dCTP pyrophosphatase 1	0.567266
Cc07_g08130	GSCOC_T00040176001	Uncharacterized protein	0.565833
Cc01_g13070	GSCOC_T00028267001	Scarecrow 14	0.565622
Cc11_g06950	GSCOC_T00020733001	RNA-dependent RNA polymerase 1	0.565415
Cc02_g10270	GSCOC_T00029546001	Glucomannan 4-beta-mannosyltransferase 9	0.565213
Cc07_g14610	GSCOC_T00036592001	LMBR1 domain-containing 2 homolog A	0.564791
Cc02_g22860	GSCOC_T00014964001	Magnesium transporter MRS2-4	0.564301
Cc02_g01650	GSCOC_T00019993001	Zinc finger CONSTANS-LIKE 1	0.563817
Cc01_g10540	GSCOC_T00024152001	ABC transporter F family member 1	0.563815
Cc07_g04660	GSCOC_T00039723001	Sodium-coupled neutral amino acid transporter 3	0.563503
Cc02_g11230	GSCOC_T00029438001	Phenylalanine ammonia-lyase	0.5635
Cc05_g10970	GSCOC_T00021374001	Uncharacterized protein	0.562706
Cc05_g12780	GSCOC_T00021146001	Probable serine threonine- kinase abkC	0.562323
Cc02_g39970	GSCOC_T00027635001	NDR1	0.562317
Cc02_g23570	GSCOC_T00015057001	Auxin response factor 1	0.562067
Cc11_g15520	GSCOC_T00038067001	Lipase	0.561558
Cc08_g16850	GSCOC_T00035660001	GPR107	0.561526
Cc01_g19450	GSCOC_T00016056001	Cyclin-P3-1	0.561448
Cc06_g07370	GSCOC_T00031271001	Adenylate chloroplastic	0.561303
Cc03_g08100	GSCOC_T00033202001	Probable sucrose-phosphate synthase 2	0.561199
Cc08_g10100	GSCOC_T00026969001	piRNA biogenesis EXD1	0.560954
Cc07_g01170	GSCOC_T00019205001	AUXIN SIGNALING F-BOX 3	0.560949
Cc10_g05470	GSCOC_T00034802001	Uncharacterized protein	0.560513
Cc06_g08020	GSCOC_T00031183001	clathrin assembly At5g35200	0.560465
Cc00_g18520	GSCOC_T00008821001	Cytochrome P450 71A2	0.560358
Cc01_g13880	GSCOC_T00028370001	Transcription factor MYB1R1	0.560004
Cc02_g02420	GSCOC_T00020097001	Uncharacterized protein	0.559744
Cc09_g08470	GSCOC_T00020809001	ABC transporter C family member 2	0.559741
Cc09_g00700	GSCOC_T00017913001	U-box domain-containing 4	0.5593
Cc02_g38070	GSCOC_T00027910001	U-box domain-containing 33	0.558909
Cc04_g00560	GSCOC_T00021674001	ATPase plasma membrane-type	0.558901
Cc05_g04040	GSCOC_T00031582001	Premnaspirodiene oxygenase	0.558706
Cc00_g28600	GSCOC_T00000395001	F-box SKIP23	0.55867
Cc02_g38820	GSCOC_T00027805001	Uncharacterized protein At5g41620	0.556883
Cc03_g03070	GSCOC_T00025983001	DUF21 domain-containing At4g14240	0.556873
Cc10_g08160	GSCOC_T00034430001	Phosphoenolpyruvate carboxykinase (ATP)	0.556548
Cc08_g16770	GSCOC_T00035650001	Mediator of RNA polymerase II transcription subunit 10	0.556355
Cc10_g06360	GSCOC_T00034671001	Probable F-actin-capping subunit beta	0.556305
Cc04_g16320	GSCOC_T00035718001	Uncharacterized protein	0.555985
Cc03_g07800	GSCOC_T00026644001	Receptor like kinase	0.55587
Cc04_g15600	GSCOC_T00042333001	Homeobox-leucine zipper HAT5	0.55536
Cc07_g19890	GSCOC_T00033890001	NEDD4-binding 2	0.55512
Cc06_g04750	GSCOC_T00042997001	Probable allantoin permease	0.554951
Cc10_g15360	GSCOC_T00033713001	Dehydrogenase reductase SDR family member 12	0.554817
Cc11_g13770	GSCOC_T00032139001	Glycerol-3-phosphate 2-O-acyltransferase 6	0.554609
Cc02_g25000	GSCOC_T00028813001	Uncharacterized protein	0.554466
Cc02_g01660	GSCOC_T00019994001	Histone-lysine N-methyltransferase ATX5	0.554096
Cc07_g05400	GSCOC_T00039811001	Uncharacterized protein	0.553309
Cc10_g08380	GSCOC_T00034395001	E3 ubiquitin- ligase UPL2	0.552983
Cc07_g06200	GSCOC_T00039916001	Floral homeotic APETALA 2	0.552867
Cc00_g13430	GSCOC_T00003238001	Receptor kinase FERONIA	0.552743
Cc02_g17160	GSCOC_T00014222001	PHD finger ALFIN-LIKE 8	0.551747
Cc00_g03450	GSCOC_T00003110001	ABC transporter B family member 25	0.551265
Cc03_g07500	GSCOC_T00026603001	F-box PP2-B11	0.551107
Cc11_g09290	GSCOC_T00032756001	Pentatricopeptide repeat-containing mitochondrial	0.551026
Cc02_g18810	GSCOC_T00014436001	Abscisic acid 8 -hydroxylase 4	0.550204
Cc11_g15940	GSCOC_T00038121001	Uncharacterized protein	0.550156
Cc01_g15990	GSCOC_T00016495001	FAR1-RELATED SEQUENCE 7	0.550012
Cc03_g06400	GSCOC_T00026434001	Auxin-responsive IAA13	0.549991
Cc02_g03780	GSCOC_T00020271001	Cysteine and histidine-rich domain-containing RAR1	0.549954
Cc05_g09050	GSCOC_T00002678001	GPI-anchor transamidase	0.549668
Cc02_g06880	GSCOC_T00039242001	Uncharacterized protein	0.549582
Cc04_g01230	GSCOC_T00021762001	Cytochrome P450 76C2	0.54901
Cc07_g05140	GSCOC_T00039777001	Calcium uniporter mitochondrial	0.548872
Cc02_g02980	GSCOC_T00020168001	late blight resistance homolog R1B-12	0.548416
[truncated: 2,154 more rows]

## Sheet: down-regulated
Gene ID	ORF Name	Protein Name	Fold Change
Cc01_g14750	GSCOC_T00028485001	CHLOROPLAST IMPORT APPARATUS 2	-8.08573
Cc11_g12580	GSCOC_T00032297001	Uncharacterized protein	-7.69533
Cc09_g06040	GSCOC_T00033372001	Pentatricopeptide repeat-containing At2g35130	-6.30026
Cc06_g08260	GSCOC_T00031153001	Umecyanin	-5.83305
Cc11_g07710	GSCOC_T00018015001	Two-component response regulator ARR1	-5.77897
Cc02_g27160	GSCOC_T00025036001	Vicianin hydrolase (Fragment)	-5.69986
Cc11_g07700	GSCOC_T00018016001	Uncharacterized protein	-5.62046
Cc06_g10420	GSCOC_T00041781001	E3 ubiquitin- ligase CIP8	-5.46682
Cc02_g03180	GSCOC_T00020190001	Uncharacterized protein	-5.21205
Cc02_g03420	GSCOC_T00020226001	Ethylene-responsive transcription factor ERF025	-5.11942
Cc06_g15450	GSCOC_T00030823001	Receptor-like serine threonine- kinase SD1-7	-5.06726
Cc03_g13730	GSCOC_T00031728001	Polygalacturonase-1 non-catalytic subunit beta	-4.77287
Cc10_g04110	GSCOC_T00034975001	Uncharacterized protein	-4.69673
Cc00_g19260	GSCOC_T00011841001	Beta-amylase	-4.57574
Cc02_g03430	GSCOC_T00020227001	Dehydration-responsive element-binding 1B	-4.42839
Cc07_g18140	GSCOC_T00018794001	Cell wall vacuolar inhibitor of fructosidase 2	-4.37416
Cc02_g32480	GSCOC_T00001240001	Sugar transporter ERD6-like 8	-4.33442
Cc01_g09500	GSCOC_T00024004001	Cytochrome P450 94A1	-4.31378
Cc07_g13750	GSCOC_T00036700001	Probable mannitol dehydrogenase	-4.30896
Cc05_g09010	GSCOC_T00002682001	kDa class I heat shock 3	-4.17741
Cc07_g13910	GSCOC_T00036679001	UDP-rhamnose:rhamnosyltransferase 1	-4.14082
Cc07_g15900	GSCOC_T00036409001	Cytochrome P450 71A1	-4.1355
Cc06_g10840	GSCOC_T00041728001	Inositol oxygenase 2	-4.09447
Cc02_g18840	GSCOC_T00014441001	Uncharacterized protein	-4.03324
Cc02_g00650	GSCOC_T00019854001	UNC93 2	-4.0172
Cc01_g19590	GSCOC_T00016040001	Antifungal ginkbilobin-2	-3.94093
Cc04_g08700	GSCOC_T00022743001	G-type lectin S-receptor-like serine threonine- kinase CES101	-3.92778
Cc02_g00640	GSCOC_T00019853001	UNC93 2	-3.89713
Cc02_g10750	GSCOC_T00029495001	Uncharacterized protein	-3.87617
Cc02_g28950	GSCOC_T00018195001	Serine carboxypeptidase-like 40	-3.84395
Cc07_g15870	GSCOC_T00036416001	Cytochrome P450 71A1	-3.82195
Cc01_g13250	GSCOC_T00028289001	Two-component response regulator ARR1	-3.81262
Cc01_g07410	GSCOC_T00030177001	Alcohol dehydrogenase-like 7	-3.75095
Cc02_g09540	GSCOC_T00029644001	Cationic amino acid transporter chloroplastic	-3.68308
Cc01_g07400	GSCOC_T00030176001	Alcohol dehydrogenase-like 7	-3.65865
Cc11_g07690	GSCOC_T00018017001	Adagio 3	-3.63597
Cc11_g08330	GSCOC_T00032889001	Phosphomannomutase phosphoglucomutase	-3.62688
Cc01_g02560	GSCOC_T00009683001	Serine threonine exchanger	-3.47966
Cc10_g12120	GSCOC_T00031899001	Germin subfamily 1 member 7	-3.30239
Cc00_g19270	GSCOC_T00011842001	Beta-amylase	-3.1619
Cc08_g15340	GSCOC_T00035463001	LURP-one-related 17	-3.14666
Cc11_g15760	GSCOC_T00038094001	Uncharacterized protein	-3.13309
Cc03_g05070	GSCOC_T00026246001	Ethylene receptor 2	-3.12129
Cc02_g28910	GSCOC_T00018191001	Serine carboxypeptidase-like 40	-3.12045
Cc01_g07390	GSCOC_T00030175001	Alcohol dehydrogenase-like 7	-3.11239
Cc06_g20660	GSCOC_T00023022001	60S acidic ribosomal P0	-3.11069
Cc06_g00640	GSCOC_T00023251001	Alpha-soluble NSF attachment	-3.09682
Cc10_g11960	GSCOC_T00031875001	Uncharacterized protein	-3.03144
Cc01_g09110	GSCOC_T00023955001	Glucan endo-	-3.02913
Cc02_g11650	GSCOC_T00029385001	Thiamine thiazole synthase chloroplastic	-3.01722
Cc01_g08270	GSCOC_T00015527001	Alcohol dehydrogenase-like 7	-3.01534
Cc05_g11140	GSCOC_T00021353001	Epidermis-specific secreted glyco EP1	-3.00985
Cc00_g11800	GSCOC_T00007741001	Probable disease resistance At4g19060	-3.00929
Cc11_g10150	GSCOC_T00032615001	Zinc finger CONSTANS-LIKE 16	-3.00613
Cc02_g02310	GSCOC_T00020082001	Uncharacterized protein PAM68-like	-2.99373
Cc06_g13100	GSCOC_T00041447001	Uncharacterized protein	-2.98092
Cc07_g15540	GSCOC_T00036462001	Low affinity sulfate transporter 3	-2.9687
Cc04_g03880	GSCOC_T00022103001	Uncharacterized protein	-2.94215
Cc09_g10130	GSCOC_T00041085001	Alph	-2.94065
Cc01_g04990	GSCOC_T00028576001	Uncharacterized protein	-2.91343
Cc01_g04260	GSCOC_T00039305001	Bifunctional peptidase and arginyl-hydroxylase JMJD5	-2.89075
Cc02_g03620	GSCOC_T00020251001	Gibberellin 20 oxidase 1-D	-2.88691
Cc01_g13730	GSCOC_T00028350001	Uncharacterized protein	-2.88307
Cc11_g07600	GSCOC_T00018028001	Uncharacterized protein	-2.85794
Cc06_g12650	GSCOC_T00041510001	Uncharacterized protein	-2.81957
Cc06_g05680	GSCOC_T00043130001	ABSCISIC ACID-INSENSITIVE 5	-2.79747
Cc05_g05080	GSCOC_T00035060001	Cytochrome P450 71D10	-2.79554
Cc05_g11580	GSCOC_T00021297001	Uncharacterized protein	-2.7954
Cc09_g01290	GSCOC_T00017832001	Uncharacterized protein	-2.78512
Cc02_g14450	GSCOC_T00013856001	GDSL esterase lipase At5g45920	-2.77607
Cc04_g06830	GSCOC_T00022482001	Uncharacterized protein	-2.77605
Cc03_g13740	GSCOC_T00031729001	Polygalacturonase-1 non-catalytic subunit beta	-2.77576
Cc04_g08690	GSCOC_T00022742001	Receptor-like serine threonine- kinase SD1-7	-2.75921
Cc02_g14530	GSCOC_T00013864001	GDSL esterase lipase At1g28570	-2.74165
Cc03_g03630	GSCOC_T00026058001	Primary amine oxidase (Fragment)	-2.73835
Cc06_g22460	GSCOC_T00005215001	Cytochrome P450 83B1	-2.73631
Cc01_g16470	GSCOC_T00016437001	Uncharacterized protein	-2.72624
Cc02_g18370	GSCOC_T00014378001	Uncharacterized protein	-2.69636
Cc11_g11280	GSCOC_T00032466001	Chaperonin 60 subunit beta chloroplastic	-2.68824
Cc06_g15470	GSCOC_T00030819001	Chitinase-3 1	-2.67695
Cc02_g34040	GSCOC_T00000635001	Transcription factor bHLH18	-2.66327
Cc02_g11430	GSCOC_T00029412001	Transcription initiation factor IIF subunit beta	-2.66107
Cc08_g13980	GSCOC_T00030279001	Sugar carrier C	-2.65627
Cc10_g12110	GSCOC_T00031898001	Germin subfamily 1 member 7	-2.65291
Cc04_g08520	GSCOC_T00022714001	GDSL esterase lipase At5g03980	-2.64783
Cc07_g07790	GSCOC_T00040139001	Uncharacterized protein At5g65660	-2.64607
Cc05_g03650	GSCOC_T00017360001	Allene oxide chloroplastic	-2.63508
Cc00_g26150	GSCOC_T00004175001	BURP domain RD22	-2.62702
Cc02_g00660	GSCOC_T00019856001	UNC93 2	-2.62561
Cc06_g07600	GSCOC_T00031241001	Uncharacterized protein	-2.6217
Cc06_g00800	GSCOC_T00023280001	DETOXIFICATION chloroplastic	-2.62088
Cc02_g33720	GSCOC_T00015419001	Serine threonine- kinase PBS1	-2.61804
Cc10_g03140	GSCOC_T00024835001	Cytochrome P450 734A1	-2.6126
Cc05_g13870	GSCOC_T00021007001	Uncharacterized protein	-2.61205
Cc04_g05320	GSCOC_T00022281001	ASPARTIC PROTEASE IN GUARD CELL 2	-2.58674
Cc00_g14170	GSCOC_T00009211001	PI-PLC X domain-containing At5g67130	-2.58566
Cc10_g06290	GSCOC_T00034680001	Uncharacterized oxidoreductase ORF334	-2.57814
Cc08_g00790	GSCOC_T00038464001	Uncharacterized protein	-2.57811
Cc01_g11730	GSCOC_T00028083001	NRT1 PTR FAMILY	-2.5672
Cc10_g05250	GSCOC_T00034834001	Cytochrome P450 81D1	-2.56085
Cc09_g07410	GSCOC_T00036265001	Reticuline oxidase	-2.5537
Cc02_g09430	GSCOC_T00029656001	Inositol oxygenase 1	-2.53745
Cc00_g24060	GSCOC_T00009222001	BURP domain RD22	-2.53009
Cc04_g15590	GSCOC_T00042332001	NRT1 PTR FAMILY	-2.52336
Cc08_g01070	GSCOC_T00038433001	Uncharacterized protein	-2.51678
Cc01_g04060	GSCOC_T00039270001	Linoleate 13S-lipoxygenase 2- chloroplastic	-2.51547
Cc06_g09660	GSCOC_T00041885001	Heat stress transcription factor C-1	-2.50509
Cc01_g15310	GSCOC_T00016578001	RING-H2 finger ATL73	-2.50503
Cc11_g09600	GSCOC_T00032697001	lipid phosphate phosphatase chloroplastic	-2.49946
Cc01_g01550	GSCOC_T00037891001	Uncharacterized protein	-2.48902
Cc02_g11040	GSCOC_T00029463001	Lysine histidine transporter 1	-2.48003
Cc02_g08550	GSCOC_T00029778001	Probable membrane-associated kinase regulator 4	-2.46702
Cc07_g15290	GSCOC_T00036497001	Uncharacterized protein	-2.4565
Cc07_g06920	GSCOC_T00040022001	Formamidase	-2.4372
Cc06_g13540	GSCOC_T00041383001	DETOXIFICATION 2	-2.43662
Cc07_g15920	GSCOC_T00037632001	Cytochrome P450 71A1	-2.43074
Cc00_g00170	GSCOC_T00036093001	Trans-cinnamate 4-monooxygenase	-2.42715
Cc00_g14180	GSCOC_T00009212001	Cytochrome P450 85A1	-2.41688
Cc06_g08780	GSCOC_T00031087001	Uncharacterized protein	-2.4096
Cc10_g08020	GSCOC_T00034451001	Tubulin alpha chain	-2.39988
Cc07_g06910	GSCOC_T00040021001	Formamidase	-2.39083
Cc10_g14270	GSCOC_T00012017001	Pathogen-related	-2.38906
Cc06_g00790	GSCOC_T00023279001	DETOXIFICATION chloroplastic	-2.3871
Cc07_g02150	GSCOC_T00039397001	Phosphoglucan phosphatase chloroplastic	-2.38647
Cc10_g03440	GSCOC_T00024869001	Probable vacuolar amino acid transporter YPQ1	-2.37715
Cc01_g20190	GSCOC_T00015962001	Xanthoxin dehydrogenase	-2.37388
Cc01_g02570	GSCOC_T00009679001	F-box kelch-repeat At2g44130	-2.37241
Cc01_g14210	GSCOC_T00028416001	Uncharacterized protein	-2.36851
Cc02_g11030	GSCOC_T00029464001	Vacuolar amino acid transporter 1	-2.36517
Cc08_g07340	GSCOC_T00025356001	Premnaspirodiene oxygenase	-2.35656
Cc03_g05410	GSCOC_T00026292001	Ethylene-responsive transcription factor 1B	-2.34219
Cc10_g06850	GSCOC_T00034604001	Uncharacterized protein	-2.33859
Cc01_g04640	GSCOC_T00041208001	Uncharacterized protein	-2.32657
Cc02_g06740	GSCOC_T00039218001	Uncharacterized protein	-2.31194
Cc00_g09200	GSCOC_T00012300001	Cytochrome P450 71A8	-2.30975
Cc00_g30450	GSCOC_T00013101001	Primary amine oxidase	-2.30741
Cc07_g06840	GSCOC_T00040009001	Endoribonuclease Dicer homolog 3a	-2.30355
Cc02_g11940	GSCOC_T00029354001	DAG chloroplastic	-2.28095
Cc01_g04690	GSCOC_T00015816001	Uncharacterized protein	-2.27697
Cc10_g05430	GSCOC_T00034806001	Isoflavone 2 -hydroxylase	-2.26967
Cc07_g17990	GSCOC_T00018816001	Uncharacterized protein	-2.26662
Cc04_g15650	GSCOC_T00042341001	Momilactone A synthase	-2.26197
Cc00_g13620	GSCOC_T00011115001	Uncharacterized protein	-2.23688
Cc02_g34950	GSCOC_T00011805001	Uncharacterized protein	-2.23021
Cc03_g11330	GSCOC_T00000040001	Probable methyltransferase PMT18	-2.21448
Cc10_g10320	GSCOC_T00031428001	Gibberellin 20 oxidase 3	-2.21079
Cc06_g14540	GSCOC_T00041242001	DNA-directed RNA polymerase chloroplastic	-2.20795
Cc01_g11740	GSCOC_T00028084001	NRT1 PTR FAMILY	-2.20594
Cc07_g14500	GSCOC_T00036608001	Transcription factor bHLH96	-2.20046
Cc07_g08450	GSCOC_T00040218001	DETOXIFICATION 6	-2.19845
Cc07_g20610	GSCOC_T00007209001	Subtilisin-like protease	-2.19584
Cc00_g29410	GSCOC_T00005692001	BURP domain RD22	-2.18879
Cc11_g05090	GSCOC_T00020449001	Uncharacterized protein	-2.17173
Cc02_g37820	GSCOC_T00027940001	Uncharacterized protein	-2.16917
Cc07_g20350	GSCOC_T00015679001	Uncharacterized protein	-2.16473
Cc07_g00680	GSCOC_T00019146001	Triacylglycerol lipase 2	-2.16344
Cc06_g06760	GSCOC_T00031344001	RING-H2 finger ATL71	-2.16085
Cc01_g10320	GSCOC_T00024120001	RING finger and CHY zinc finger domain-containing 1	-2.1551
Cc11_g15750	GSCOC_T00038093001	Uncharacterized protein	-2.15203
Cc04_g14540	GSCOC_T00040698001	L-type lectin-domain containing receptor kinase	-2.1446
Cc00_g10040	GSCOC_T00003812001	disease resistance RGA4	-2.13173
Cc07_g06860	GSCOC_T00040011001	Uncharacterized protein	-2.126
Cc06_g22430	GSCOC_T00005212001	Cytochrome P450 71A1	-2.11006
Cc11_g01420	GSCOC_T00019568001	Pleiotropic drug resistance 1	-2.10747
Cc11_g14140	GSCOC_T00032100001	Uncharacterized WD repeat-containing alr3466	-2.10685
Cc00_g18130	GSCOC_T00010237001	Isoflavone 2 -hydroxylase	-2.10571
Cc03_g03660	GSCOC_T00026061001	Primary amine oxidase	-2.10109
Cc06_g09270	GSCOC_T00041935001	Non-specific lipid transfer GPI-anchored 1	-2.09174
Cc01_g07500	GSCOC_T00009390001	GAST1	-2.08857
Cc02_g06050	GSCOC_T00039129001	Ferritin- chloroplastic	-2.08787
Cc08_g03310	GSCOC_T00010788001	Ethylene-responsive transcription factor WRI1	-2.08624
Cc00_g27370	GSCOC_T00001308001	Linoleate 13S-lipoxygenase 3- chloroplastic	-2.08593
Cc06_g16320	GSCOC_T00030710001		-2.08116
Cc05_g05000	GSCOC_T00035047001	Uncharacterized protein	-2.07799
Cc00_g32000	GSCOC_T00009493001	Dihydroflavonol 4-reductase	-2.07117
Cc08_g04060	GSCOC_T00034210001	G-type lectin S-receptor-like serine threonine- kinase CES101	-2.0649
Cc02_g21140	GSCOC_T00014750001	Uncharacterized protein	-2.06478
Cc06_g23000	GSCOC_T00040640001	Thymidylate kinase	-2.06178
Cc07_g14740	GSCOC_T00036573001	Peroxidase 49	-2.05941
Cc11_g14470	GSCOC_T00032055001	Probable alph	-2.05788
Cc05_g01990	GSCOC_T00040825001	Zinc finger CONSTANS-LIKE 10	-2.05594
Cc09_g02660	GSCOC_T00017646001	G-type lectin S-receptor-like serine threonine- kinase At1g11303	-2.05538
Cc00_g31340	GSCOC_T00007855001	Germin 1-2	-2.0471
Cc07_g09960	GSCOC_T00037177001	Probable mitochondrial chaperone bcs1	-2.04529
Cc02_g06870	GSCOC_T00039240001	BAHD acyltransferase DCR	-2.04528
Cc00_g29600	GSCOC_T00002220001	Cellulose synthase B6	-2.04494
Cc10_g11110	GSCOC_T00016684001	Vinorine synthase	-2.03702
Cc00_g19570	GSCOC_T00008845001	Cytochrome P450 76C4	-2.03698
Cc06_g15320	GSCOC_T00030845001	Lysosomal Pro-X carboxypeptidase	-2.03684
Cc08_g13160	GSCOC_T00030375001	Primary amine oxidase	-2.03309
Cc02_g21150	GSCOC_T00014751001	Vinorine synthase	-2.02938
Cc07_g05940	GSCOC_T00039882001	Uncharacterized protein	-2.02019
Cc03_g07770	GSCOC_T00026641001	Uncharacterized protein	-2.01834
Cc07_g13100	GSCOC_T00036793001	Ethylene-responsive transcription factor 1B	-2.01775
Cc07_g01540	GSCOC_T00039326001	Uncharacterized CRM domain-containing chloroplastic	-2.0047
Cc07_g13110	GSCOC_T00036787001	Ethylene-responsive transcription factor 1B	-2.00413
Cc00_g35890	GSCOC_T00005696001	Polyphenol oxidase chloroplastic	-2.00399
Cc09_g00500	GSCOC_T00017942001	Microtubule-associated 70-4	-1.99986
Cc01_g14200	GSCOC_T00028415001	EARLY FLOWERING 4	-1.99958
Cc06_g14550	GSCOC_T00041240001	DNA-directed RNA polymerase chloroplastic	-1.99814
Cc04_g06610	GSCOC_T00022452001	Uncharacterized protein	-1.99688
Cc01_g15110	GSCOC_T00016604001	Peroxidase 4	-1.99301
Cc08_g14680	GSCOC_T00030194001	Tubulin beta-2 chain	-1.99249
Cc02_g34680	GSCOC_T00000729001	homolog subfamily B member 6	-1.9884
Cc00_g11810	GSCOC_T00007743001	Uncharacterized protein	-1.98346
Cc06_g22050	GSCOC_T00017139001	Cytochrome P450 83B1	-1.98033
Cc01_g10140	GSCOC_T00024095001	RING-H2 finger ATL11	-1.97764
Cc01_g18410	GSCOC_T00016208001	Hyoscyamine 6-dioxygenase	-1.97753
Cc07_g06740	GSCOC_T00039997001	Uncharacterized protein	-1.97596
Cc03_g07230	GSCOC_T00026566001	Probable pectate lyase 15	-1.96519
Cc04_g10190	GSCOC_T00042560001	Uncharacterized protein	-1.95787
Cc04_g12550	GSCOC_T00005319001	LRR receptor-like serine threonine- kinase	-1.95617
Cc02_g37790	GSCOC_T00027944001	Actin-depolymerizing factor 10	-1.95484
Cc06_g06120	GSCOC_T00006893001	Lysosomal beta glucosidase	-1.95439
Cc02_g25030	GSCOC_T00028809001	Plasma membrane ATPase 1	-1.95372
Cc01_g06750	GSCOC_T00030074001	SNF1-related kinase regulatory subunit beta-1	-1.95304
Cc00_g21970	GSCOC_T00011086001	MDIS1-interacting receptor like kinase 2	-1.95034
Cc01_g13950	GSCOC_T00028379001	Phosphomethylpyrimidine chloroplastic	-1.94239
Cc04_g14560	GSCOC_T00040705001	L-type lectin-domain containing receptor kinase	-1.9307
Cc07_g05710	GSCOC_T00039851001	Serine threonine- kinase SRK2E	-1.92976
Cc02_g28510	GSCOC_T00009437001	RNA polymerase sigma factor	-1.92902
Cc10_g13880	GSCOC_T00035225001	Probable inactive receptor kinase At1g65250	-1.92683
Cc07_g05880	GSCOC_T00039874001	Patatin-2-Kuras 1	-1.92313
Cc11_g15450	GSCOC_T00038056001	Cysteine-rich receptor kinase 2	-1.91976
Cc08_g12440	GSCOC_T00030483001	glucuronosyltransferase PGSIP7	-1.91678
Cc11_g12830	GSCOC_T00032263001	Expansin-A1	-1.91597
Cc11_g09930	GSCOC_T00032649001	Transcription factor MYB21	-1.91558
Cc02_g36020	GSCOC_T00042760001	NRT1 PTR FAMILY	-1.90744
Cc02_g09100	GSCOC_T00029703001	Uncharacterized protein	-1.89708
Cc10_g10960	GSCOC_T00016651001	Ethylene-responsive transcription factor ERF013	-1.89433
Cc06_g10360	GSCOC_T00041789001	Probable RNA-dependent RNA polymerase 5	-1.87895
Cc11_g02490	GSCOC_T00018504001	late blight resistance homolog R1B-17	-1.87802
Cc03_g10450	GSCOC_T00031063001	Pirin	-1.87721
Cc04_g07750	GSCOC_T00022609001	Probable calcium-binding CML15	-1.87652
Cc06_g15460	GSCOC_T00030820001	Acidic mammalian chitinase	-1.87046
Cc10_g02170	GSCOC_T00024715001	S-type anion channel SLAH1	-1.87045
Cc06_g03880	GSCOC_T00023685001	Serine threonine- kinase CCR2	-1.87024
Cc02_g23860	GSCOC_T00015090001	Probable leucine-rich repeat receptor kinase At5g49770	-1.86967
Cc04_g07590	GSCOC_T00022589001	chloroplastic	-1.86465
Cc02_g12050	GSCOC_T00029337001	G-type lectin S-receptor-like serine threonine- kinase SD1-1	-1.86422
Cc07_g09660	GSCOC_T00037213001	Transcription factor bHLH63	-1.85861
Cc11_g11460	GSCOC_T00032443001	pentatricopeptide repeat-containing At1g13630	-1.85273
Cc07_g17340	GSCOC_T00037443001	Peroxidase 5	-1.85216
Cc07_g14490	GSCOC_T00036609001	Probable glucan	-1.85155
Cc05_g07550	GSCOC_T00042287001	Zinc finger CCCH domain-containing 61	-1.84552
Cc11_g02470	GSCOC_T00018501001	late blight resistance homolog R1B-14	-1.83944
Cc07_g13830	GSCOC_T00036691001	Probable pectate lyase 15	-1.8322
Cc02_g04130	GSCOC_T00020316001	21 kDa	-1.83102
Cc02_g29340	GSCOC_T00018351001	amidase	-1.82858
Cc05_g03610	GSCOC_T00017366001	cellulose synthase H3	-1.82523
Cc06_g18610	GSCOC_T00040485001	Pentatricopeptide repeat-containing At5g66520	-1.82025
Cc04_g03770	GSCOC_T00022083001	Pentatricopeptide repeat-containing chloroplastic	-1.8185
Cc02_g01590	GSCOC_T00019985001	Calcineurin B 7	-1.81576
Cc00_g08030	GSCOC_T00006062001	NAC domain-containing 100	-1.81212
Cc05_g14420	GSCOC_T00038821001	Cell division homolog chloroplastic	-1.81123
Cc00_g09350	GSCOC_T00008789001	Cellulose synthase H1	-1.81063
Cc03_g10350	GSCOC_T00031050001	Pirin	-1.80516
Cc05_g10720	GSCOC_T00021404001	B-box zinc finger 22	-1.80343
Cc08_g07830	GSCOC_T00011878001	F-box only 6	-1.80296
Cc02_g14460	GSCOC_T00013857001	GDSL esterase lipase At5g45920	-1.80165
Cc00_g06280	GSCOC_T00008048001	Annexin D8	-1.79944
Cc06_g10410	GSCOC_T00041782001	E3 ubiquitin- ligase RING1	-1.79723
Cc02_g11730	GSCOC_T00029377001	Cysteine-rich receptor kinase 10	-1.79468
Cc04_g04770	GSCOC_T00022213001	UPF0481 At3g02645	-1.79346
Cc05_g12450	GSCOC_T00021190001	Beta-glucosidase 18	-1.79342
Cc05_g14410	GSCOC_T00038822001	Cell division homolog chloroplastic	-1.79242
Cc02_g18480	GSCOC_T00014392001	Peroxidase 10	-1.78778
Cc07_g04870	GSCOC_T00039748001	Proline dehydrogenase mitochondrial	-1.77765
Cc08_g12110	GSCOC_T00030526001	Cytochrome P450 71D10	-1.7776
Cc11_g11450	GSCOC_T00032444001	Uncharacterized protein	-1.77429
Cc03_g02390	GSCOC_T00025882001	Tubby-like F-box 6	-1.77103
Cc05_g08740	GSCOC_T00016906001	Secologanin synthase	-1.76417
Cc11_g02480	GSCOC_T00018503001	Uncharacterized protein	-1.76376
Cc02_g37830	GSCOC_T00027939001	Uncharacterized protein	-1.75818
Cc02_g15910	GSCOC_T00014058001	Probable LRR receptor-like serine threonine- kinase RFK1	-1.7541
Cc04_g10440	GSCOC_T00042593001	Uncharacterized protein	-1.74988
Cc03_g00820	GSCOC_T00025679001	Uncharacterized protein	-1.74915
Cc06_g22200	GSCOC_T00017165001	Phospholipase A2-alpha	-1.74572
Cc08_g11400	GSCOC_T00027141001	Expansin-like B1	-1.74275
Cc00_g17920	GSCOC_T00008100001	Probable phosphate dikinase regulatory chloroplastic	-1.74223
Cc06_g10680	GSCOC_T00041748001	Uncharacterized protein	-1.74086
Cc06_g21280	GSCOC_T00018124001	4-alpha-glucanotransferase DPE2	-1.73805
Cc05_g10840	GSCOC_T00021390001	Probable LRR receptor-like serine threonine- kinase At1g53430	-1.73766
Cc06_g13430	GSCOC_T00041399001	Probable xyloglucan endotransglucosylase hydrolase 23	-1.73417
Cc08_g01290	GSCOC_T00038406001	Polyamine aminopropyltransferase	-1.73102
Cc06_g01310	GSCOC_T00023346001	Rhodanese-like domain-containing 10	-1.72938
Cc01_g02940	GSCOC_T00013235001	G-type lectin S-receptor-like serine threonine- kinase At1g11303	-1.72906
Cc06_g19570	GSCOC_T00029024001	UDP-glucose flavonoid 3-O-glucosyltransferase 3	-1.72732
Cc08_g15020	GSCOC_T00035424001	Zinc finger CONSTANS-LIKE 5	-1.72674
Cc01_g12760	GSCOC_T00028221001	E3 ubiquitin- ligase XBAT31	-1.72505
Cc11_g11410	GSCOC_T00032448001	DNA-directed RNA polymerase mitochondrial	-1.72231
Cc06_g08040	GSCOC_T00031181001	Uncharacterized protein	-1.72086
Cc02_g27820	GSCOC_T00025132001	TRANSPARENT TESTA 1	-1.71947
Cc10_g02670	GSCOC_T00024773001	Uncharacterized protein	-1.71308
Cc10_g10580	GSCOC_T00036010001	O-fucosyltransferase 1	-1.71013
Cc09_g10120	GSCOC_T00041089001	Subtilisin-like protease	-1.70824
Cc01_g13570	GSCOC_T00028327001	UDP-glycosyltransferase 76C4	-1.70656
Cc11_g15660	GSCOC_T00038084001	DETOXIFICATION 41	-1.70239
Cc00_g19220	GSCOC_T00011836001	Uncharacterized protein	-1.70121
Cc05_g06880	GSCOC_T00042204001	Expansin-B17	-1.69992
Cc06_g21270	GSCOC_T00018123001	4-alpha-glucanotransferase DPE2	-1.69906
Cc00_g04110	GSCOC_T00013741001	Cysteine protease XCP1	-1.69834
Cc07_g15910	GSCOC_T00037634001	Cytochrome P450 71A1	-1.6962
Cc10_g13850	GSCOC_T00035229001	Probable inactive receptor kinase At1g65250	-1.69345
Cc07_g08650	GSCOC_T00040249001	LEAF RUST 10 DISEASE-RESISTANCE LOCUS RECEPTOR-LIKE PROTEIN KINASE-like	-1.68822
Cc06_g10620	GSCOC_T00041755001	Uncharacterized protein	-1.68796
Cc07_g13730	GSCOC_T00036702001	Probable mannitol dehydrogenase	-1.68479
Cc00_g33450	GSCOC_T00007482001	Uncharacterized protein	-1.68297
Cc01_g02600	GSCOC_T00009676001	Disease resistance RGA2	-1.68255
Cc01_g02580	GSCOC_T00009678001	Uncharacterized protein	-1.68223
Cc07_g09010	GSCOC_T00040294001	Uncharacterized protein	-1.67887
Cc02_g16030	GSCOC_T00014078001	Probable LRR receptor-like serine threonine- kinase At3g47570	-1.67468
Cc01_g15350	GSCOC_T00016573001	Probable glutathione S-transferase parA	-1.67415
Cc05_g04760	GSCOC_T00035011001	Vacuolar amino acid transporter 1	-1.67362
Cc11_g04730	GSCOC_T00042900001	Cytochrome P450 78A3	-1.67197
Cc09_g07270	GSCOC_T00036287001	Alpha-glucosidase	-1.66604
Cc10_g01600	GSCOC_T00024643001	Peptidyl-prolyl cis-trans isomerase	-1.66597
Cc01_g17730	GSCOC_T00016289001	ABC transporter C family member 5	-1.66483
Cc02_g34090	GSCOC_T00000644001	Transcription factor NAI1	-1.66456
Cc07_g07430	GSCOC_T00040092001	Pentatricopeptide repeat-containing At3g49740	-1.66285
Cc05_g08790	GSCOC_T00016911001	Secologanin synthase	-1.66017
Cc05_g04630	GSCOC_T00031703001	Aconitate cytoplasmic	-1.65824
Cc07_g01730	GSCOC_T00039349001	Uncharacterized protein	-1.65473
Cc02_g34170	GSCOC_T00000653001	Heparan-alpha-glucosaminide N-acetyltransferase	-1.65396
Cc01_g17720	GSCOC_T00016290001	Tyrosine decarboxylase 1	-1.65231
Cc08_g01530	GSCOC_T00038372001	Beta-amylase chloroplastic	-1.65123
Cc07_g09380	GSCOC_T00037250001	Proline-rich receptor kinase PERK5	-1.64577
Cc08_g15690	GSCOC_T00035509001	Ethylene-responsive transcription factor CRF2	-1.64547
Cc01_g13560	GSCOC_T00028326001	Copper transporter 6	-1.64408
Cc05_g12370	GSCOC_T00021199001	Protochlorophyllide chloroplastic	-1.64375
Cc01_g13760	GSCOC_T00028354001	Alpha-glucan H isozyme	-1.64331
Cc01_g02610	GSCOC_T00009674001	Cytochrome P450 71D10	-1.64152
Cc09_g10140	GSCOC_T00041084001	Proline-rich receptor kinase PERK1	-1.64088
Cc05_g01710	GSCOC_T00015747001	Linoleate 13S-lipoxygenase 3- chloroplastic	-1.64036
Cc02_g05860	GSCOC_T00039106001	Cation H(+) antiporter 15	-1.63918
Cc01_g14760	GSCOC_T00028486001	UDP-glycosyltransferase 87A1	-1.63844
Cc07_g14880	GSCOC_T00036558001	UDP-glycosyltransferase 85A3	-1.63832
Cc02_g25980	GSCOC_T00028671001	NRT1 PTR FAMILY	-1.6376
Cc00_g30760	GSCOC_T00004674001	Linoleate 13S-lipoxygenase 3- chloroplastic	-1.63655
Cc11_g11360	GSCOC_T00032454001	Transcription factor bHLH49	-1.63556
Cc00_g28960	GSCOC_T00002176001	Cytochrome P450 71A8	-1.63437
Cc02_g11740	GSCOC_T00029376001	Uncharacterized protein	-1.6327
Cc04_g03800	GSCOC_T00022087001	Plastidic ATP ADP-transporter	-1.63218
Cc04_g07070	GSCOC_T00022512001	Chloroplastic group IIA intron splicing facilitator chloroplastic	-1.6311
Cc04_g12390	GSCOC_T00005298001	Uncharacterized protein	-1.62878
Cc06_g13170	GSCOC_T00041436001	VERNALIZATION INSENSITIVE 3	-1.62441
Cc05_g09650	GSCOC_T00021556001	Chlorophyll a-b binding chloroplastic (Fragments)	-1.62295
Cc02_g25420	GSCOC_T00028748001	Cytochrome P450 734A1	-1.6179
Cc06_g13380	GSCOC_T00041407001	Zinc finger 2	-1.61771
Cc04_g02460	GSCOC_T00021918001	Uncharacterized protein	-1.61669
Cc01_g03630	GSCOC_T00033075001	E3 ubiquitin- ligase LIN-1	-1.61505
Cc02_g15050	GSCOC_T00013937001	Probable serine threonine- kinase drkA	-1.60804
Cc02_g34050	GSCOC_T00000636001	Transcription factor bHLH18	-1.60237
Cc00_g35910	GSCOC_T00011630001	amidase	-1.60008
Cc02_g31290	GSCOC_T00027589001	Uncharacterized protein	-1.59894
Cc05_g05360	GSCOC_T00035104001	SHORT-ROOT	-1.59882
Cc10_g09060	GSCOC_T00034302001	Pentatricopeptide repeat-containing At1g71490	-1.59876
Cc06_g03890	GSCOC_T00023687001	V-type proton ATPase subunit G2	-1.59782
Cc04_g00850	GSCOC_T00021711001	GDSL esterase lipase 5	-1.59271
Cc08_g05920	GSCOC_T00024390001	Abscisic acid 8 -hydroxylase 1	-1.59196
Cc01_g00720	GSCOC_T00011062001		-1.59011
Cc10_g04410	GSCOC_T00034938001	Patatin-11	-1.58844
Cc02_g29590	GSCOC_T00018398001	Vetispiradiene synthase 1	-1.58649
Cc00_g13010	GSCOC_T00002079001	Molybdenum cofactor sulfurase	-1.58584
Cc02_g21030	GSCOC_T00014735001	Root phototropism 3	-1.57874
Cc07_g14730	GSCOC_T00036574001	6-hydroxynicotinate 3-monooxygenase	-1.57752
Cc09_g04810	GSCOC_T00017378001	Apyrase	-1.57637
Cc08_g02420	GSCOC_T00037715001	Pentatricopeptide repeat-containing chloroplastic	-1.57088
Cc02_g24550	GSCOC_T00028870001	Squamosa promoter-binding 7	-1.56988
Cc07_g06870	GSCOC_T00040013001	Peroxidase 73	-1.56706
Cc11_g11400	GSCOC_T00032449001	Sodium-coupled neutral amino acid transporter 2	-1.56594
Cc08_g15860	GSCOC_T00035530001	Hydroquinone glucosyltransferase	-1.56321
Cc02_g16580	GSCOC_T00014151001	Uncharacterized protein	-1.55993
Cc00_g14670	GSCOC_T00013421001	Flavonoid 3 -monooxygenase	-1.5593
Cc01_g09730	GSCOC_T00024037001	Stress-response A B barrel domain-containing At5g22580	-1.55834
Cc06_g10780	GSCOC_T00041734001	Glutathione hydrolase 1 proenzyme	-1.55705
Cc09_g02650	GSCOC_T00017647001	G-type lectin S-receptor-like serine threonine- kinase At1g11303	-1.55667
Cc08_g10070	GSCOC_T00026966001	Zinc finger CCCH domain-containing 20	-1.55647
Cc11_g16250	GSCOC_T00038161001	Uncharacterized protein	-1.55512
Cc09_g01680	GSCOC_T00017777001	Transcription factor CPC	-1.55276
Cc03_g04850	GSCOC_T00026215001	Uncharacterized protein	-1.5516
Cc11_g15110	GSCOC_T00001014001	Light-regulated chloroplastic	-1.54184
Cc03_g03610	GSCOC_T00026054001	Polyamine aminopropyltransferase	-1.54075
Cc04_g04050	GSCOC_T00022122001	WD repeat-containing 43	-1.53642
Cc04_g16330	GSCOC_T00035719001	Thioredoxin-like 1- chloroplastic	-1.53544
Cc11_g09950	GSCOC_T00032647001	Uncharacterized protein	-1.53144
Cc10_g04960	GSCOC_T00034869001	Quinone oxidoreductase PIG3	-1.52218
Cc02_g01580	GSCOC_T00019984001	Calcineurin B 4	-1.52215
Cc06_g07060	GSCOC_T00031309001	Probable glutamate carboxypeptidase AMP1	-1.52062
Cc08_g03500	GSCOC_T00034131001	Alpha beta hydrolase domain-containing 17B	-1.51903
Cc01_g08770	GSCOC_T00023912001	Uncharacterized protein At5g41620	-1.51874
Cc06_g06020	GSCOC_T00043172001	Indole-3-acetic acid-induced ARG7	-1.51693
Cc07_g02560	GSCOC_T00039454001	Gibberellin-regulated 14	-1.51624
Cc00_g15570	GSCOC_T00011342001	Probable 2-oxoglutarate Fe(II)-dependent dioxygenase	-1.51318
Cc03_g02280	GSCOC_T00025869001	CASP 1E2	-1.51248
Cc11_g17460	GSCOC_T00038318001	Zinc finger CONSTANS-LIKE 15	-1.51222
Cc00_g05090	GSCOC_T00002393001	Receptor CLAVATA2	-1.50947
Cc05_g03210	GSCOC_T00033517001	Uncharacterized protein	-1.50947
Cc02_g14960	GSCOC_T00013922001	Cyclic dof factor 4	-1.50733
Cc00_g19760	GSCOC_T00008869001	disease resistance RGA3	-1.50637
Cc07_g10170	GSCOC_T00037152001	3-epi-6-deoxocathasterone 23-monooxygenase CYP90C1	-1.50222
Cc10_g13020	GSCOC_T00035354001	Pentatricopeptide repeat-containing chloroplastic	-1.50099
Cc11_g06390	GSCOC_T00020651001	G-type lectin S-receptor-like serine threonine- kinase At5g24080	-1.50078
Cc00_g19850	GSCOC_T00007581001	Thaumatin	-1.50021
Cc04_g04760	GSCOC_T00022211001	UPF0481 At3g02645	-1.4987
Cc07_g14790	GSCOC_T00036568001	Probable serine threonine- kinase CST	-1.49782
Cc02_g13680	GSCOC_T00029115001	Ethylene-responsive transcription factor 12	-1.49672
Cc02_g04770	GSCOC_T00020399001	Cytosolic sulfotransferase 5	-1.49292
Cc01_g08820	GSCOC_T00023919001	Uncharacterized protein	-1.49074
Cc02_g13430	GSCOC_T00029158001	Uncharacterized protein	-1.48686
Cc09_g02070	GSCOC_T00017724001	Tyrosine-specific transport	-1.48145
Cc03_g00950	GSCOC_T00025694001	DELLA GAI1	-1.47937
Cc06_g05980	GSCOC_T00043168001	pentatricopeptide repeat-containing mitochondrial	-1.47892
Cc00_g24390	GSCOC_T00002089001	Phospholipase A1- chloroplastic	-1.47835
Cc01_g17220	GSCOC_T00016351001	Pantoate--beta-alanine ligase	-1.4764
Cc00_g31440	GSCOC_T00006470001	Uncharacterized protein	-1.47609
Cc10_g06840	GSCOC_T00034605001	Uncharacterized protein	-1.47532
Cc01_g11650	GSCOC_T00028070001	Interactor of constitutive active ROPs 3	-1.47435
Cc00_g19230	GSCOC_T00011837001	Blue copper	-1.47424
Cc03_g09300	GSCOC_T00042688001	UDP-glycosyltransferase 75D1	-1.47407
Cc04_g04880	GSCOC_T00022227001	Ethylene-responsive transcription factor ERF003	-1.47372
Cc02_g13110	GSCOC_T00029199001	Stem-specific TSJT1	-1.47132
Cc01_g10350	GSCOC_T00024125001	Uncharacterized protein	-1.46996
Cc06_g09860	GSCOC_T00041858001	Rho guanine nucleotide exchange factor 8	-1.46994
Cc10_g03880	GSCOC_T00024929001	Uncharacterized protein	-1.4677
Cc01_g14280	GSCOC_T00028424001	serine threonine- kinase CCR3	-1.46678
Cc02_g26990	GSCOC_T00025010001	Pentatricopeptide repeat-containing At1g25360	-1.46639
Cc09_g04820	GSCOC_T00017376001	Apyrase	-1.46154
Cc02_g38260	GSCOC_T00027886001	G-type lectin S-receptor-like serine threonine- kinase SD2-2	-1.45884
Cc04_g03100	GSCOC_T00021999001	Probable dynein light chain	-1.45788
Cc05_g13920	GSCOC_T00020999001	Transcription factor GAMYB	-1.45692
Cc04_g15730	GSCOC_T00042351001	NRT1 PTR FAMILY	-1.4565
Cc02_g15630	GSCOC_T00014017001	Probable alph	-1.4552
Cc06_g21200	GSCOC_T00034059001	Metacaspase-9	-1.45469
Cc02_g05700	GSCOC_T00039085001	Transcription factor bHLH61	-1.45419
Cc03_g13510	GSCOC_T00018980001	Auxin response factor 2	-1.44978
Cc10_g01560	GSCOC_T00024633001	Thaumatin 1	-1.44955
Cc07_g10780	GSCOC_T00037074001	Chaperone dnaJ chloroplastic	-1.44709
Cc10_g00630	GSCOC_T00024520001	BTB POZ domain-containing At2g30600	-1.44641
Cc05_g00750	GSCOC_T00013165001	Acidic endochitinase	-1.44242
Cc07_g19510	GSCOC_T00018565001	Pentatricopeptide repeat-containing mitochondrial	-1.44227
Cc09_g02670	GSCOC_T00017645001	G-type lectin S-receptor-like serine threonine- kinase At1g11303	-1.43979
Cc03_g08210	GSCOC_T00033219001	UPF0481 At3g47200	-1.43975
Cc07_g17980	GSCOC_T00018818001	Histone-lysine N-methyltransferase ATXR5	-1.43915
Cc06_g02040	GSCOC_T00023444001	Probable glutathione S-transferase	-1.43904
Cc08_g13570	GSCOC_T00030328001	Blue copper	-1.43485
Cc04_g11510	GSCOC_T00037343001	Tropinone reductase homolog At1g07440	-1.43275
Cc00_g16440	GSCOC_T00005629001	Uncharacterized protein	-1.43212
Cc03_g03180	GSCOC_T00025997001	Basic 7S globulin	-1.43019
Cc02_g35020	GSCOC_T00011812001	Ocs element-binding factor 1	-1.43
Cc02_g15920	GSCOC_T00014059001	Probable LRR receptor-like serine threonine- kinase At1g07650	-1.42954
Cc05_g10910	GSCOC_T00021383001	Uncharacterized protein	-1.42694
Cc10_g12260	GSCOC_T00031924001	Beta-galactosidase 16	-1.4247
Cc09_g02970	GSCOC_T00017606001	Leucine-rich repeat receptor kinase PXL1	-1.42358
Cc10_g04830	GSCOC_T00034888001	Transcription factor EMB1444	-1.42278
Cc04_g04390	GSCOC_T00022163001	Uncharacterized protein	-1.42107
Cc11_g08080	GSCOC_T00032923001	Myb family transcription factor APL	-1.42053
Cc01_g08630	GSCOC_T00023894001	Uncharacterized protein	-1.41769
Cc09_g10110	GSCOC_T00041090001	Subtilisin-like protease	-1.41718
Cc11_g01750	GSCOC_T00019522001	Cytochrome P450 76C4	-1.4167
Cc03_g15260	GSCOC_T00026796001	Reticuline oxidase	-1.41449
Cc09_g09090	GSCOC_T00023108001	Probable purine permease 10	-1.41338
Cc07_g14690	GSCOC_T00036580001	2	-1.41283
Cc03_g09600	GSCOC_T00030944001	Transcription factor bHLH77	-1.41261
Cc09_g00260	GSCOC_T00017969001	U-box domain-containing 33	-1.4121
Cc02_g12150	GSCOC_T00029326001	Calcium-binding PBP1	-1.40943
Cc10_g14210	GSCOC_T00012011001	LRR receptor-like serine threonine- kinase RCH1	-1.40882
Cc08_g04050	GSCOC_T00034209001	Calcium permeable stress-gated cation channel 1	-1.40697
Cc05_g06370	GSCOC_T00042124001	F-box LRR-repeat At5g41840	-1.406
Cc04_g07760	GSCOC_T00022610001	Uncharacterized protein	-1.40423
Cc07_g05830	GSCOC_T00039865001	Oxidoreductase	-1.40406
Cc04_g04360	GSCOC_T00022160001	LURP-one-related 12	-1.40397
Cc01_g08300	GSCOC_T00015533001	Alcohol dehydrogenase-like 7	-1.40147
Cc02_g10930	GSCOC_T00029474001	Kinesin KIN-UA	-1.40106
Cc10_g09750	GSCOC_T00031505001	NRT1 PTR FAMILY	-1.39989
Cc00_g01590	GSCOC_T00003673001	Exocyst complex component 7	-1.39984
Cc02_g06730	GSCOC_T00039216001	Anthranilate synthase alpha subunit chloroplastic	-1.39917
Cc08_g12840	GSCOC_T00030423001	Adenine phosphoribosyltransferase chloroplastic	-1.3974
Cc06_g13300	GSCOC_T00041417001	Probable mitochondrial chaperone BCS1-B	-1.39634
Cc07_g01740	GSCOC_T00039350001	Uncharacterized protein	-1.39506
Cc00_g11580	GSCOC_T00007370001	Uncharacterized protein	-1.39452
Cc02_g13890	GSCOC_T00029082001	Receptor kinase 5	-1.39385
Cc03_g03480	GSCOC_T00026038001	Probable membrane-associated kinase regulator 1	-1.39086
Cc11_g15880	GSCOC_T00038114001	GDSL esterase lipase At3g26430	-1.3905
Cc05_g15740	GSCOC_T00038652001	PRA1 family G2	-1.38998
Cc06_g22790	GSCOC_T00040668001	Alpha-L-arabinofuranosidase 1	-1.38903
Cc05_g03890	GSCOC_T00017317001	H ACA ribonucleo complex subunit 4	-1.38891
Cc06_g21080	GSCOC_T00034088001	Uncharacterized protein	-1.38846
Cc01_g10410	GSCOC_T00024137001	Probable xyloglucan endotransglucosylase hydrolase 32	-1.38593
Cc01_g11410	GSCOC_T00024270001	Auxin response factor 15	-1.38323
Cc09_g04970	GSCOC_T00007067001	Pentatricopeptide repeat-containing chloroplastic	-1.38288
Cc01_g21550	GSCOC_T00004967001	Pentatricopeptide repeat-containing mitochondrial	-1.38102
Cc02_g36120	GSCOC_T00006316001	Nascent polypeptide-associated complex subunit alpha	-1.37946
Cc08_g02650	GSCOC_T00037746001	Probable carboxylesterase 120	-1.37806
Cc08_g09260	GSCOC_T00017272001	NRT1 PTR FAMILY	-1.37771
Cc06_g10560	GSCOC_T00041762001	IQ-DOMAIN 31	-1.37621
Cc00_g17550	GSCOC_T00012275001	Peroxidase 3	-1.37317
Cc01_g12900	GSCOC_T00028242001	Pentatricopeptide repeat-containing At5g65560	-1.37218
Cc06_g03310	GSCOC_T00023611001	Pentatricopeptide repeat-containing chloroplastic	-1.37195
Cc05_g10790	GSCOC_T00021397001	Uncharacterized protein	-1.37168
Cc06_g13830	GSCOC_T00041341001	Probable alph	-1.37156
Cc08_g12990	GSCOC_T00030400001	Probable ATP-dependent RNA helicase DHX37	-1.37153
Cc02_g23060	GSCOC_T00014985001	Uncharacterized protein	-1.37047
Cc10_g05240	GSCOC_T00034836001	Isoflavone 2 -hydroxylase	-1.36953
Cc11_g11720	GSCOC_T00032409001	MADS-box CMB1	-1.36899
Cc06_g07210	GSCOC_T00031293001	Lysosomal beta glucosidase	-1.36833
Cc03_g05050	GSCOC_T00026242001	Cellulose synthase G2	-1.36772
Cc11_g12400	GSCOC_T00032321001	Pentatricopeptide repeat-containing mitochondrial	-1.36697
Cc02_g14070	GSCOC_T00029061001	Auxin response factor 2	-1.36547
Cc07_g17300	GSCOC_T00037448001	Uncharacterized protein	-1.36401
Cc06_g07020	GSCOC_T00031314001	Probable carboxylesterase 15	-1.3619
Cc00_g15320	GSCOC_T00009839001	disease resistance RGA4	-1.35974
Cc03_g01750	GSCOC_T00025797001	E3 ubiquitin- ligase LIN-1	-1.35936
Cc01_g14960	GSCOC_T00016621001	F-box LRR-repeat 3	-1.3584
Cc06_g03870	GSCOC_T00023684001	serine threonine- kinase (Fragment)	-1.35765
Cc02_g12370	GSCOC_T00029291001	Vacuolar 8	-1.35543
Cc07_g12050	GSCOC_T00036926001	RING-H2 finger ATL80	-1.35405
Cc10_g04430	GSCOC_T00034935001	Patatin group A-3	-1.35394
Cc08_g07210	GSCOC_T00025335001	Pentatricopeptide repeat-containing At3g06920	-1.35296
Cc06_g22880	GSCOC_T00040656001	glucose-6-phosphate 1-epimerase	-1.35143
Cc11_g12390	GSCOC_T00032323001	pentatricopeptide repeat-containing mitochondrial	-1.34885
Cc11_g15300	GSCOC_T00038040001	Probable polygalacturonase At1g80170	-1.34821
Cc06_g08690	GSCOC_T00031097001	Probable ethanolamine kinase A	-1.3478
Cc11_g06160	GSCOC_T00020610001	DETOXIFICATION 6	-1.34425
Cc05_g15330	GSCOC_T00038705001	Peptidyl-prolyl cis-trans isomerase FKBP16- chloroplastic	-1.34354
Cc00_g32590	GSCOC_T00011519001	Uncharacterized protein	-1.34136
Cc07_g00200	GSCOC_T00019084001	Zinc finger CONSTANS-LIKE 7	-1.34013
Cc02_g28890	GSCOC_T00018187001	Serine carboxypeptidase-like 40	-1.33967
Cc00_g19540	GSCOC_T00007982001	disease resistance RGA4	-1.33817
Cc08_g10540	GSCOC_T00027023001	Calcineurin B 9	-1.33777
Cc02_g14000	GSCOC_T00029070001	Homeobox-leucine zipper ATHB-52	-1.33765
Cc00_g33180	GSCOC_T00003246001	Endochitinase B	-1.33011
Cc07_g06890	GSCOC_T00040016001	scarecrow 16	-1.32891
Cc11_g12980	GSCOC_T00032242001	Vacuolar amino acid transporter 1	-1.32876
Cc02_g12640	GSCOC_T00029258001	Uncharacterized protein	-1.32782
Cc11_g08350	GSCOC_T00032887001	Kirola	-1.32523
Cc08_g02630	GSCOC_T00037743001	Carboxylesterase 1	-1.32435
Cc00_g10230	GSCOC_T00006743001	Gibberellin 3-beta-dioxygenase 4	-1.32382
Cc11_g09540	GSCOC_T00032705001	zinc finger At1g68190	-1.32339
Cc00_g25080	GSCOC_T00010336001	Gibberellin 3-beta-dioxygenase 4	-1.32283
Cc02_g11370	GSCOC_T00029419001	Nucleolar complex 2 homolog	-1.32142
Cc01_g02530	GSCOC_T00009689001	Uncharacterized protein	-1.32098
Cc02_g34100	GSCOC_T00000645001	Transcription factor bHLH19	-1.32038
Cc09_g10080	GSCOC_T00041093001	Uncharacterized protein	-1.31988
Cc08_g01680	GSCOC_T00038347001	Uncharacterized protein	-1.31767
Cc02_g19060	GSCOC_T00014469001	CBS domain-containing chloroplastic	-1.31657
Cc07_g15860	GSCOC_T00036417001	Pentatricopeptide repeat-containing At3g53170	-1.3162
Cc04_g09130	GSCOC_T00022792001	Zinc finger JACKDAW	-1.31458
Cc07_g06960	GSCOC_T00040026001	Uncharacterized protein	-1.3144
Cc00_g26320	GSCOC_T00011918001	Lysosomal beta glucosidase	-1.31342
Cc06_g04260	GSCOC_T00023738001	ABC transporter B family member 19	-1.31216
Cc00_g21100	GSCOC_T00012627001	Probable LRR receptor-like serine threonine- kinase At1g56130	-1.31058
Cc11_g06420	GSCOC_T00020654001	Uncharacterized protein	-1.30936
Cc07_g15740	GSCOC_T00036435001	Uncharacterized protein	-1.30721
Cc05_g11950	GSCOC_T00021251001	Uncharacterized protein	-1.30676
Cc07_g17550	GSCOC_T00008838001	Meiosis regulator and mRNA stability factor 1	-1.30242
Cc03_g05670	GSCOC_T00026332001	Uncharacterized protein	-1.3017
Cc08_g02640	GSCOC_T00037744001	Carboxylesterase 1	-1.29991
Cc07_g12670	GSCOC_T00036845001	Uncharacterized protein	-1.29836
Cc04_g12040	GSCOC_T00005246001	Receptor kinase TMK1	-1.29762
Cc11_g16640	GSCOC_T00038205001	Remorin	-1.29687
Cc11_g08340	GSCOC_T00032888001	Kirola	-1.29161
Cc00_g00280	GSCOC_T00036106001	Uncharacterized protein At4g15970	-1.28985
Cc06_g10660	GSCOC_T00041751001	Derlin-1	-1.28899
Cc10_g11120	GSCOC_T00016685001	Auxin transporter 5	-1.28736
Cc06_g11920	GSCOC_T00041600001	Mechanosensitive ion channel 10	-1.28624
Cc09_g01310	GSCOC_T00017828001	Calcium permeable stress-gated cation channel 1	-1.28573
Cc03_g03980	GSCOC_T00026099001	Uncharacterized N-acetyltransferase p20	-1.2855
Cc06_g19070	GSCOC_T00028956001	Ribosomal RNA small subunit methyltransferase NEP1	-1.28504
Cc07_g05950	GSCOC_T00039884001	Multidrug and toxin extrusion 1	-1.27842
Cc08_g01090	GSCOC_T00038431001	LRR receptor-like serine threonine- kinase ERECTA	-1.27814
Cc05_g10280	GSCOC_T00021472001	Uncharacterized protein	-1.27803
Cc11_g01810	GSCOC_T00019509001	Pentatricopeptide repeat-containing mitochondrial	-1.27658
Cc00_g34260	GSCOC_T00012941001	amidase	-1.27137
Cc10_g09700	GSCOC_T00031511001	NRT1 PTR FAMILY	-1.26981
Cc08_g07320	GSCOC_T00025351001	Premnaspirodiene oxygenase	-1.2678
Cc06_g02980	GSCOC_T00023568001	Probable histone	-1.2677
Cc10_g09670	GSCOC_T00031514001	NRT1 PTR FAMILY	-1.2677
Cc05_g12200	GSCOC_T00021221001	CTL 1	-1.26748
Cc10_g12810	GSCOC_T00032010001	Pentatricopeptide repeat-containing mitochondrial	-1.26527
Cc06_g13110	GSCOC_T00041445001	Uncharacterized protein	-1.26517
Cc11_g15770	GSCOC_T00038095001	MAK16 homolog A	-1.26385
Cc02_g29280	GSCOC_T00010443001	Uncharacterized protein	-1.26194
Cc06_g12080	GSCOC_T00041578001	Auxin-binding ABP20	-1.26176
Cc04_g11700	GSCOC_T00037374001	Ferric reduction oxidase mitochondrial	-1.26133
Cc03_g14850	GSCOC_T00026728001	disease resistance RGA4	-1.26098
Cc04_g05180	GSCOC_T00022263001	Pentatricopeptide repeat-containing mitochondrial	-1.26041
Cc00_g13630	GSCOC_T00009320001	Uncharacterized protein	-1.25904
Cc03_g06270	GSCOC_T00026417001	Plasmodesmata-located 2	-1.25837
Cc00_g17520	GSCOC_T00000104001	disease resistance RGA3	-1.25651
Cc02_g23950	GSCOC_T00015100001	Pentatricopeptide repeat-containing chloroplastic	-1.25477
Cc07_g07420	GSCOC_T00040091001	Squalene monooxygenase	-1.25331
Cc08_g00490	GSCOC_T00038509001	Adenine phosphoribosyltransferase 2	-1.25295
Cc06_g15370	GSCOC_T00030837001	Two-component response regulator ARR12	-1.25246
Cc01_g02450	GSCOC_T00009705001	Uncharacterized protein At5g01610	-1.25167
Cc11_g11820	GSCOC_T00032394001	Fructokinase-2	-1.24944
Cc02_g34140	GSCOC_T00000650001	Tafazzin	-1.24813
Cc06_g12360	GSCOC_T00041546001	Ankyrin repeat-containing ITN1	-1.24749
Cc05_g12620	GSCOC_T00021165001	Uncharacterized protein	-1.24709
Cc04_g12070	GSCOC_T00005249001	Uncharacterized protein	-1.247
Cc04_g02060	GSCOC_T00021873001	Phospholipase D alpha 4	-1.24652
Cc11_g11070	GSCOC_T00032488001	Uncharacterized protein	-1.24632
Cc00_g02890	GSCOC_T00004310001	Peptidyl-prolyl cis-trans isomerase FKBP43	-1.2461
Cc08_g06080	GSCOC_T00024434001	Uncharacterized protein	-1.24594
Cc07_g17890	GSCOC_T00018832001	Uridylate kinase	-1.24529
Cc01_g00860	GSCOC_T00011081001	Tubulin alpha-1 chain	-1.24441
Cc00_g03380	GSCOC_T00012859001	Uncharacterized protein	-1.24333
Cc00_g34660	GSCOC_T00011935001	Gibberellin 20 oxidase 2	-1.24311
Cc02_g11550	GSCOC_T00029398001	Tryptophan synthase beta chain chloroplastic	-1.24125
Cc01_g13610	GSCOC_T00028334001	Mitochondrial import inner membrane translocase subunit TIM10	-1.24023
Cc00_g06650	GSCOC_T00007489001	Bifunctional dihydroflavonol 4-reductase flavanone 4-reductase	-1.24005
Cc04_g03740	GSCOC_T00022073001	Pleiotropic drug resistance 1	-1.23992
Cc11_g12680	GSCOC_T00032285001	Uncharacterized protein	-1.23936
Cc02_g37750	GSCOC_T00027948001	Transcription factor MYB39	-1.23896
Cc09_g01840	GSCOC_T00017756001	kDa class V heat shock	-1.23802
Cc02_g11930	GSCOC_T00029355001	Uncharacterized protein	-1.23758
Cc01_g18390	GSCOC_T00016211001	Ethylene-responsive transcription factor 1B	-1.23572
Cc00_g27660	GSCOC_T00008393001	disease resistance RGA4	-1.23491
Cc11_g03910	GSCOC_T00034000001	Pentatricopeptide repeat-containing chloroplastic	-1.23326
Cc10_g04600	GSCOC_T00034916001	Subtilisin-like protease	-1.23118
Cc03_g02780	GSCOC_T00025947001	Probable phosphatase 2C 35	-1.23083
Cc10_g05260	GSCOC_T00034833001	Cytochrome P450 81F1	-1.23054
Cc09_g10250	GSCOC_T00041068001	Uncharacterized protein	-1.2303
Cc07_g01710	GSCOC_T00039347001	Uncharacterized protein	-1.23017
Cc01_g01440	GSCOC_T00037908001	1-aminocyclopropane-1-carboxylate oxidase homolog 1	-1.22956
Cc10_g01640	GSCOC_T00024647001	Tubulin beta-1 chain	-1.22851
Cc00_g00750	GSCOC_T00036189001	F-box At5g07610	-1.22729
Cc11_g06110	GSCOC_T00020602001	DETOXIFICATION 6	-1.22655
Cc02_g21360	GSCOC_T00014777001	UDP-glycosyltransferase 85A2	-1.22614
Cc00_g11240	GSCOC_T00011609001	Uncharacterized protein	-1.22576
Cc03_g03080	GSCOC_T00025985001	Adenylate isopentenyltransferase chloroplastic	-1.22566
Cc00_g12460	GSCOC_T00005353001	Deacetoxyvindoline 4-hydroxylase	-1.22449
Cc07_g01700	GSCOC_T00039346001	Uncharacterized protein	-1.22386
Cc05_g11080	GSCOC_T00021360001	Uncharacterized protein	-1.22023
Cc08_g01060	GSCOC_T00038434001	Endoglucanase 16	-1.21589
Cc02_g22590	GSCOC_T00014934001	pentatricopeptide repeat-containing At3g49142	-1.21578
Cc04_g12880	GSCOC_T00003262001	Gibberellin 3-beta-dioxygenase 1	-1.21548
Cc04_g15520	GSCOC_T00042324001	Mitochondrial outer membrane porin of 36 kDa	-1.21405
Cc06_g16610	GSCOC_T00030660001	Probable glucuronoxylan glucuronosyltransferase F8H	-1.21365
Cc00_g32740	GSCOC_T00010960001	disease resistance RGA4	-1.21337
Cc06_g12970	GSCOC_T00041467001	Probable LRR receptor-like serine threonine- kinase At1g56140	-1.21319
Cc08_g06810	GSCOC_T00005443001	Uncharacterized protein	-1.21286
Cc11_g06690	GSCOC_T00020694001	Alph	-1.21254
Cc11_g10430	GSCOC_T00032580001	NRT1 PTR FAMILY	-1.2125
Cc07_g16580	GSCOC_T00037543001	Brassinosteroid LRR receptor kinase	-1.2117
Cc02_g07350	GSCOC_T00029951001	Uncharacterized protein At2g3979	-1.21149
Cc00_g28880	GSCOC_T00002612001	ATPase family AAA domain-containing 3-B	-1.21119
Cc04_g04380	GSCOC_T00022162001	Palmitoyl-monogalactosyldiacylglycerol delta-7 chloroplastic	-1.21
Cc08_g06870	GSCOC_T00025232001	Uncharacterized protein	-1.20781
Cc11_g05710	GSCOC_T00020539001	Uncharacterized protein	-1.20558
Cc06_g04570	GSCOC_T00042969001	Phosphatidylinositol 4-phosphate 5-kinase 9	-1.20431
Cc01_g18440	GSCOC_T00016205001	Nephrocystin-3	-1.204
Cc07_g21390	GSCOC_T00016951001	ETHYLENE INSENSITIVE 3	-1.20322
Cc08_g16580	GSCOC_T00035622001	BTB POZ domain-containing At3g05675	-1.20267
Cc10_g02510	GSCOC_T00024755001	Uncharacterized protein	-1.20247
Cc10_g15350	GSCOC_T00033712001	Choline ethanolamine kinase	-1.20174
Cc00_g16930	GSCOC_T00013750001	MDIS1-interacting receptor like kinase 2	-1.20151
Cc03_g04230	GSCOC_T00026133001	Chlorophyllase- chloroplastic	-1.20083
Cc08_g04290	GSCOC_T00034248001	COBW domain-containing 1	-1.19977
Cc06_g20050	GSCOC_T00022903001	Uncharacterized protein	-1.1981
Cc09_g05080	GSCOC_T00007081001	Phosphoribosylglycinamide chloroplastic	-1.19727
Cc00_g32410	GSCOC_T00006083001	SRG1	-1.19393
Cc02_g13670	GSCOC_T00029117001	Receptor kinase At5g59670	-1.19353
Cc02_g12240	GSCOC_T00029309001	Equilibrative nucleoside transporter 4	-1.19343
Cc10_g01750	GSCOC_T00024662001	Uncharacterized protein	-1.19309
Cc10_g01800	GSCOC_T00024668001	Probable diphthine methyl ester synthase	-1.19304
Cc11_g01600	GSCOC_T00019542001	Probable LRR receptor-like serine threonine- kinase At3g47570	-1.19297
Cc02_g25630	GSCOC_T00028724001	Uncharacterized protein	-1.19254
Cc02_g15740	GSCOC_T00014033001	Pentatricopeptide repeat-containing At4g18840	-1.19164
Cc00_g03410	GSCOC_T00000270001	Inositol transporter 4	-1.19122
Cc11_g00220	GSCOC_T00019447001	Probable galactinol--sucrose galactosyltransferase 2	-1.19085
Cc04_g05600	GSCOC_T00022320001	Germin subfamily 3 member 4	-1.19023
Cc00_g20110	GSCOC_T00006215001	Uncharacterized protein	-1.18833
Cc03_g11520	GSCOC_T00019359001	Nucleolar 6	-1.18802
Cc11_g04610	GSCOC_T00004819001	Momilactone A synthase	-1.188
Cc03_g08950	GSCOC_T00042741001	Uncharacterized protein	-1.18686
Cc03_g14330	GSCOC_T00031831001	Uncharacterized protein	-1.18614
Cc00_g31530	GSCOC_T00007984001	UDP-glycosyltransferase 85A2	-1.18604
Cc06_g19100	GSCOC_T00028960001	Pentatricopeptide repeat-containing mitochondrial	-1.18467
Cc07_g01720	GSCOC_T00039348001	Uncharacterized protein	-1.18254
Cc02_g03910	GSCOC_T00020293001	Peptidyl-prolyl cis-trans isomerase FKBP53	-1.18209
Cc10_g03450	GSCOC_T00024870001	Probable calcium-binding CML41	-1.18112
Cc00_g31820	GSCOC_T00004172001	STRICTOSIDINE SYNTHASE-LIKE 12	-1.18095
Cc11_g03440	GSCOC_T00040783001	Chaperone	-1.17989
Cc06_g16310	GSCOC_T00030711001	ABHD18	-1.17986
Cc00_g29280	GSCOC_T00011749001	Codeine O-demethylase	-1.17943
Cc00_g16690	GSCOC_T00012625001	Gibberellin 3-beta-dioxygenase 4	-1.17818
Cc05_g09390	GSCOC_T00021591001	Ribosomal L1 domain-containing 1	-1.17794
Cc00_g26700	GSCOC_T00003035001	disease resistance RGA3	-1.17692
Cc04_g09350	GSCOC_T00022818001	Mitogen-activated kinase kinase 5	-1.17524
Cc08_g15050	GSCOC_T00035429001	BTB POZ domain-containing At1g63850	-1.17269
Cc02_g32610	GSCOC_T00001217001	Uncharacterized protein	-1.17245
Cc08_g12340	GSCOC_T00030497001	Uncharacterized protein	-1.1722
Cc02_g08140	GSCOC_T00029841001	3-hydroxypropionyl-coenzyme A dehydratase	-1.17219
Cc02_g18910	GSCOC_T00014451001	Probable receptor kinase At1g49730	-1.17199
Cc05_g10440	GSCOC_T00021441001	Pentatricopeptide repeat-containing mitochondrial	-1.16943
Cc08_g05050	GSCOC_T00042454001	pentatricopeptide repeat-containing At1g31840	-1.16853
Cc00_g06330	GSCOC_T00008056001	Annexin D8	-1.16775
Cc02_g03720	GSCOC_T00020265001	Alpha-L-fucosidase 1	-1.16763
Cc06_g23650	GSCOC_T00040542001	Pentatricopeptide repeat-containing mitochondrial	-1.16624
Cc02_g26310	GSCOC_T00028622001	Pentatricopeptide repeat-containing chloroplastic	-1.16437
Cc11_g15010	GSCOC_T00001030001	Ethylene-responsive transcription factor ERF113	-1.16376
Cc01_g13720	GSCOC_T00028349001	Uncharacterized protein	-1.16199
Cc02_g20560	GSCOC_T00014670001	Uncharacterized protein	-1.16158
Cc06_g10370	GSCOC_T00041788001	NADP-dependent malic enzyme	-1.16146
Cc10_g01460	GSCOC_T00024617001	Extended synaptotagmin-2	-1.16056
Cc10_g13250	GSCOC_T00035321001	Bifunctional uridylyltransferase uridylyl-removing enzyme	-1.15984
Cc10_g04270	GSCOC_T00034955001	Probable phosphatase 2C 12	-1.15944
Cc07_g09110	GSCOC_T00040307001	Anthocyanidin 3-O-glucosyltransferase 5	-1.15903
Cc06_g20230	GSCOC_T00022936001	NRT1 PTR FAMILY	-1.15887
Cc02_g10430	GSCOC_T00029530001	SEC12 1	-1.15672
Cc02_g16570	GSCOC_T00014150001	Uncharacterized protein	-1.15516
Cc05_g11460	GSCOC_T00021312001	Vacuolar cation proton exchanger 5	-1.15428
Cc10_g13220	GSCOC_T00035325001	Chaperone dnaJ 10	-1.15348
Cc11_g05630	GSCOC_T00020527001	Zinc finger JACKDAW	-1.15168
Cc11_g05720	GSCOC_T00020540001	65-kDa microtubule-associated 7	-1.14803
Cc07_g08560	GSCOC_T00040234001	Non-specific lipid-transfer 2	-1.1476
Cc11_g11060	GSCOC_T00032489001	Uncharacterized protein	-1.14651
Cc05_g14590	GSCOC_T00038800001	Uncharacterized protein	-1.14582
Cc08_g09450	GSCOC_T00026884001	UPF0481 At3g02645	-1.14511
Cc06_g12350	GSCOC_T00041547001	Caskin-1	-1.14442
Cc06_g05750	GSCOC_T00043140001	Heparanase 3	-1.14396
Cc09_g07890	GSCOC_T00003775001	N-acetyl-D-glucosamine kinase	-1.14362
Cc01_g13830	GSCOC_T00028365001	NRT1 PTR FAMILY	-1.14177
Cc01_g07590	GSCOC_T00009377001	(+)-neomenthol dehydrogenase	-1.14146
Cc05_g15010	GSCOC_T00038747001	Uncharacterized protein	-1.1413
Cc10_g03570	GSCOC_T00024886001	Allene oxide chloroplastic	-1.14033
Cc11_g16740	GSCOC_T00038220001	Probable mitochondrial chaperone bcs1	-1.13914
Cc11_g10570	GSCOC_T00032560001	Probable leucine-rich repeat receptor kinase At2g28990	-1.13847
Cc04_g12400	GSCOC_T00005299001	Pentatricopeptide repeat-containing At4g02750	-1.13756
Cc11_g05050	GSCOC_T00020445001	Pentatricopeptide repeat-containing mitochondrial	-1.13625
Cc06_g04230	GSCOC_T00023732001	Heavy metal-associated isoprenylated plant 26	-1.13548
Cc11_g12220	GSCOC_T00032345001	Alpha-	-1.13195
Cc00_g17570	GSCOC_T00008473001	disease resistance RGA4	-1.13127
Cc02_g16400	GSCOC_T00014125001	Glycine-rich 2	-1.12933
Cc06_g12370	GSCOC_T00041545001	Ankyrin repeat and SAM domain-containing 1A	-1.12833
Cc06_g20150	GSCOC_T00022923001	Calmodulin-interacting 111	-1.12808
Cc07_g06320	GSCOC_T00039933001	Uncharacterized protein At4g06744	-1.12774
Cc09_g05200	GSCOC_T00007094001	GTP-binding ERG	-1.12734
Cc10_g15270	GSCOC_T00033702001	GIGANTEA	-1.12724
Cc06_g11980	GSCOC_T00041590001	ELF4-LIKE 4	-1.12689
Cc08_g11610	GSCOC_T00027165001	Pentatricopeptide repeat-containing mitochondrial	-1.12409
Cc02_g37250	GSCOC_T00028018001	Serine arginine-rich splicing factor RS41	-1.12409
Cc10_g04620	GSCOC_T00034914001	Probable serine threonine- kinase At1g01540	-1.12224
Cc03_g10040	GSCOC_T00031004001	MACPF domain-containing At1g14780	-1.1217
Cc01_g16460	GSCOC_T00016438001	mRNA-capping enzyme	-1.12112
Cc08_g14530	GSCOC_T00030211001	Glutathione S-transferase T2	-1.11847
Cc05_g00810	GSCOC_T00013173001	Hevamine-A	-1.11832
Cc09_g01110	GSCOC_T00017853001	1-aminocyclopropane-1-carboxylate oxidase	-1.1181
Cc00_g08270	GSCOC_T00003341001	Isoflavone reductase homolog A622	-1.11738
Cc05_g05530	GSCOC_T00035123001	Disease resistance RPP13 4	-1.11578
Cc02_g37620	GSCOC_T00027964001	T-complex 1 subunit theta	-1.11454
Cc03_g03140	GSCOC_T00025993001	Heavy metal-associated isoprenylated plant 26	-1.11331
Cc05_g15660	GSCOC_T00038661001	Pentatricopeptide repeat-containing At5g56310	-1.11233
Cc02_g25260	GSCOC_T00028772001	Cyclin-U4-1	-1.11177
Cc02_g25520	GSCOC_T00028738001	Uncharacterized protein	-1.11164
Cc06_g18450	GSCOC_T00040461001	Polyadenylate-binding -interacting 2	-1.10916
Cc03_g03390	GSCOC_T00026023001	methyltransferase C9orf114 homolog	-1.10808
Cc07_g15430	GSCOC_T00036477001	Epidermis-specific secreted glyco EP1	-1.1071
Cc00_g30650	GSCOC_T00009518001	disease resistance RGA3	-1.1061
Cc06_g06050	GSCOC_T00043176001	Uncharacterized protein	-1.10608
Cc02_g35100	GSCOC_T00011830001	Pentatricopeptide repeat-containing At1g60770	-1.10583
Cc07_g08460	GSCOC_T00040220001	DETOXIFICATION 6	-1.10573
Cc00_g34910	GSCOC_T00006527001	Methylglutaconyl- mitochondrial	-1.10529
Cc02_g09890	GSCOC_T00029595001	Pentatricopeptide repeat-containing At2g27610	-1.10523
Cc09_g05510	GSCOC_T00013393001	Uncharacterized protein	-1.10504
Cc03_g01620	GSCOC_T00025779001	DETOXIFICATION 6	-1.10475
Cc02_g35010	GSCOC_T00011811001	Pentatricopeptide repeat-containing At1g09820	-1.10402
Cc06_g00650	GSCOC_T00023252001	D-alanine--D-alanine ligase A	-1.10389
Cc01_g09830	GSCOC_T00024052001	Uncharacterized protein	-1.10281
Cc01_g07540	GSCOC_T00009385001	Uncharacterized protein	-1.10159
Cc03_g08040	GSCOC_T00033192001	Uncharacterized protein	-1.10043
Cc06_g00880	GSCOC_T00023291001	Mitoferrin	-1.09979
Cc06_g06180	GSCOC_T00031416001	Uncharacterized protein	-1.09768
Cc01_g00940	GSCOC_T00038008001	Uncharacterized protein	-1.09669
Cc02_g39670	GSCOC_T00027684001	Probable serine threonine- kinase WNK4	-1.09654
Cc05_g09920	GSCOC_T00021523001	Elongation factor mitochondrial	-1.09644
Cc00_g13780	GSCOC_T00013301001	Probable saccharopine dehydrogenas	-1.09491
Cc04_g04930	GSCOC_T00022232001	Uncharacterized protein	-1.0947
Cc05_g04780	GSCOC_T00035013001	DETOXIFICATION 41	-1.09439
Cc06_g14090	GSCOC_T00041302001	Auxin-induced 5NG4	-1.09342
Cc02_g27980	GSCOC_T00025156001	NADPH:quinone oxidoreductase	-1.09287
Cc05_g12350	GSCOC_T00021201001	Ribosome biogenesis BRX1 homolog	-1.09244
Cc06_g03830	GSCOC_T00023679001	Fasciclin-like arabinogalactan 11	-1.09178
Cc02_g32810	GSCOC_T00016700001	Probable S-acyltransferase 17	-1.09175
Cc02_g14510	GSCOC_T00013862001	Pentatricopeptide repeat-containing mitochondrial	-1.0916
Cc04_g02520	GSCOC_T00021925001	Proline-rich receptor kinase PERK8	-1.09141
Cc03_g04950	GSCOC_T00026226001	Pentatricopeptide repeat-containing At1g62910	-1.09109
Cc02_g25620	GSCOC_T00028725001	Uncharacterized protein	-1.09108
Cc03_g00860	GSCOC_T00025683001	Uncharacterized protein	-1.09091
Cc06_g12200	GSCOC_T00041566001	Cysteine ase 3	-1.09075
Cc02_g13880	GSCOC_T00029083001	Uncharacterized protein	-1.09057
Cc08_g08800	GSCOC_T00017212001	BURP domain RD22	-1.08965
Cc02_g04950	GSCOC_T00038987001	Pentatricopeptide repeat-containing chloroplastic	-1.0891
Cc06_g04270	GSCOC_T00023739001	Uncharacterized protein	-1.08862
Cc08_g14950	GSCOC_T00035412001	AT-rich interactive domain-containing 2	-1.0874
Cc11_g02460	GSCOC_T00018499001	40S ribosomal S4	-1.08531
Cc00_g30290	GSCOC_T00005391001	Aspartic ase 1	-1.08508
Cc00_g01490	GSCOC_T00010661001	L-type lectin-domain containing receptor kinase	-1.0838
Cc11_g17470	GSCOC_T00038319001	Uncharacterized protein	-1.08312
Cc02_g06630	GSCOC_T00039205001	Cytochrome P450 90A1	-1.08235
Cc04_g02090	GSCOC_T00021876001	Proline-rich receptor kinase PERK13	-1.08201
Cc05_g06480	GSCOC_T00042138001	Formimidoyltransferase-cyclodeaminase	-1.08171
Cc01_g21070	GSCOC_T00005025001	GTP pyrophosphokinase	-1.08142
Cc06_g16300	GSCOC_T00030712001	Polygalacturonase inhibitor	-1.08129
Cc11_g10580	GSCOC_T00032559001	Probable galacturonosyltransferase-like 3	-1.07969
Cc08_g16000	GSCOC_T00035548001	Endoglucanase 6	-1.07959
Cc09_g09520	GSCOC_T00000754001	LRR receptor-like serine threonine- kinase FLS2	-1.07895
Cc09_g04570	GSCOC_T00017410001	Endoglucanase 24	-1.0786
Cc11_g16950	GSCOC_T00038248001	Uncharacterized protein	-1.07842
Cc08_g05080	GSCOC_T00042451001	Uncharacterized protein	-1.07793
Cc04_g05020	GSCOC_T00022242001	H ACA ribonucleo complex subunit NHP2	-1.07668
Cc02_g21870	GSCOC_T00014837001	Uncharacterized protein	-1.07665
Cc00_g22710	GSCOC_T00002421001	Uncharacterized protein	-1.07552
Cc00_g05670	GSCOC_T00011952001	amidase	-1.07421
Cc01_g14710	GSCOC_T00028481001	Glucan endo-	-1.07386
Cc02_g28780	GSCOC_T00018167001	Uncharacterized protein	-1.07239
Cc02_g23840	GSCOC_T00015088001	Uncharacterized protein	-1.07161
Cc04_g05210	GSCOC_T00022267001	homolog subfamily B member 5	-1.07149
Cc02_g00670	GSCOC_T00019857001	Uncharacterized protein C16G5.07c	-1.07123
Cc10_g07650	GSCOC_T00034496001	Uncharacterized protein	-1.07065
Cc06_g15380	GSCOC_T00030836001	Alpha beta hydrolase domain-containing 17C	-1.07012
Cc00_g03150	GSCOC_T00003071001	Annexin RJ4	-1.07002
Cc11_g01610	GSCOC_T00019541001	Polyamine oxidase 3	-1.06944
Cc06_g20220	GSCOC_T00022935001	NRT1 PTR FAMILY	-1.06874
Cc11_g05150	GSCOC_T00020456001	G-type lectin S-receptor-like serine threonine- kinase At4g27290	-1.06841
Cc09_g07430	GSCOC_T00036260001	Reticuline oxidase	-1.06803
Cc02_g09420	GSCOC_T00029657001	Uncharacterized protein	-1.06798
Cc07_g00250	GSCOC_T00019091001	Very-long-chain 3-oxoacyl- reductase	-1.06796
Cc00_g07450	GSCOC_T00008320001	Uncharacterized protein	-1.06789
Cc02_g13020	GSCOC_T00029210001	Bifunctional epoxide hydrolase 2	-1.06772
Cc11_g05390	GSCOC_T00020490001	late blight resistance homolog R1B-17	-1.06673
Cc05_g10040	GSCOC_T00021508001	Endoplasmic reticulum oxidoreductin-1	-1.06534
Cc02_g21470	GSCOC_T00014789001	Outer envelope mitochondrial	-1.06515
Cc08_g07890	GSCOC_T00011890001	Formin 17	-1.06416
Cc00_g16190	GSCOC_T00013150001	Uncharacterized protein	-1.0639
Cc11_g16200	GSCOC_T00038155001	Probable pectate lyase 5	-1.06368
Cc08_g02850	GSCOC_T00037780001	Uncharacterized protein	-1.06228
Cc04_g10770	GSCOC_T00042647001	LEAF RUST 10 DISEASE-RESISTANCE LOCUS RECEPTOR-LIKE PROTEIN KINASE-like	-1.06057
Cc07_g15610	GSCOC_T00036455001	L-ascorbate oxidase	-1.05998
Cc04_g03570	GSCOC_T00022052001	F-box kelch-repeat At1g80440	-1.05976
Cc03_g04940	GSCOC_T00026225001	Pentatricopeptide repeat-containing chloroplastic	-1.05864
Cc11_g12280	GSCOC_T00032338001	Pentatricopeptide repeat-containing At5g66520	-1.05853
Cc08_g02490	GSCOC_T00037725001	LSD1	-1.05819
Cc00_g29260	GSCOC_T00011966001	eIF-2-alpha kinase GCN2	-1.05814
Cc09_g06050	GSCOC_T00033371001	Pentatricopeptide repeat-containing mitochondrial	-1.05807
Cc08_g14820	GSCOC_T00035391001	UDP-N-acetylmuramoyl-L-alanyl-D-glutamate--	-1.05738
Cc10_g04000	GSCOC_T00034990001	Polyadenylate-binding RBP47	-1.0563
Cc05_g08220	GSCOC_T00016839001	Transcription factor AIG1	-1.05576
Cc00_g03300	GSCOC_T00011599001	disease resistance RPP13 1	-1.05523
Cc00_g19020	GSCOC_T00011100001	SRG1	-1.053
Cc11_g09680	GSCOC_T00032688001	Uncharacterized protein	-1.05286
Cc01_g13550	GSCOC_T00028324001	Copper transporter 1	-1.05272
Cc03_g13140	GSCOC_T00030596001	Ribonuclease J	-1.05236
Cc00_g27280	GSCOC_T00007367001	Probable pectate lyase 13	-1.05182
Cc01_g09740	GSCOC_T00024038001	Uncharacterized protein	-1.05164
Cc08_g14970	GSCOC_T00035416001	Uncharacterized protein	-1.05091
Cc04_g05190	GSCOC_T00022264001	Uncharacterized protein	-1.05086
Cc02_g29800	GSCOC_T00038884001	Cytochrome c oxidase assembly COX15	-1.05063
Cc02_g37040	GSCOC_T00028044001	Subtilisin-like protease	-1.04898
Cc11_g01380	GSCOC_T00019574001	Uncharacterized protein	-1.04797
Cc02_g12040	GSCOC_T00029338001	G-type lectin S-receptor-like serine threonine- kinase SD1-1	-1.04688
Cc04_g10080	GSCOC_T00042543001	Malate glyoxysomal	-1.04615
Cc06_g23670	GSCOC_T00040539001	Chloroplast envelope membrane	-1.04579
Cc00_g17320	GSCOC_T00001369001	UDP-3-O-acylglucosamine N-acyltransferase	-1.04569
Cc10_g15770	GSCOC_T00033771001	Aspartic ase nepenthesin-1	-1.04518
Cc04_g00070	GSCOC_T00021605001	Adenine nucleotide transporter chloroplastic amyloplastic mitochondrial	-1.0444
Cc00_g13770	GSCOC_T00013300001	Alpha-aminoadipic semialdehyde mitochondrial	-1.04395
Cc08_g12940	GSCOC_T00030408001	Monocopper oxidase SKS1	-1.04352
Cc11_g15400	GSCOC_T00038050001	NSP-INTERACTING KINASE 3	-1.04275
Cc00_g24260	GSCOC_T00004189001	Cytochrome P450 716B1	-1.04275
Cc00_g28280	GSCOC_T00000756001	SRG1	-1.04255
Cc11_g10230	GSCOC_T00032605001	Alpha-xylosidase 1	-1.04122
Cc06_g11200	GSCOC_T00041687001	Transcription factor MYB1R1	-1.04115
Cc10_g06830	GSCOC_T00034606001	F-box FBW2	-1.04087
Cc00_g04360	GSCOC_T00005968001	Probable mitochondrial chaperone bcs1	-1.04083
Cc08_g05540	GSCOC_T00024328001	Pentatricopeptide repeat-containing At1g31790	-1.04031
Cc02_g20840	GSCOC_T00014706001	Costars family WS02710_H03	-1.03876
Cc02_g26690	GSCOC_T00024970001	Uncharacterized protein	-1.03862
Cc10_g05740	GSCOC_T00034772001	Sigma factor regulation	-1.03794
Cc08_g14320	GSCOC_T00030238001	Probable DEAD-box ATP-dependent RNA helicase 48	-1.03696
Cc00_g11330	GSCOC_T00007152001	Bark storage A	-1.03612
Cc02_g00270	GSCOC_T00019803001	ATPase family AAA domain-containing 3-A	-1.03604
Cc09_g06120	GSCOC_T00033360001	Pentatricopeptide repeat-containing At4g19890	-1.03602
Cc04_g04650	GSCOC_T00022197001	COBW domain-containing 2	-1.03573
Cc00_g23750	GSCOC_T00012207001	Isoflavone reductase homolog	-1.03503
Cc06_g16710	GSCOC_T00004122001	Leucine-rich repeat receptor-like tyrosine- kinase PXC3	-1.03447
Cc04_g05580	GSCOC_T00022318001	Respiratory burst oxidase homolog C	-1.0334
Cc09_g05650	GSCOC_T00033436001	Probable LRR receptor-like serine threonine- kinase At3g47570	-1.03316
Cc00_g06310	GSCOC_T00008053001	Annexin RJ4	-1.03279
Cc07_g15830	GSCOC_T00036421001	Alanine--glyoxylate aminotransferase 2 homolog mitochondrial	-1.03275
Cc11_g02020	GSCOC_T00033038001	Probable disease resistance RDL6	-1.03057
Cc10_g01610	GSCOC_T00024644001	E3 ubiquitin- ligase LIN-1	-1.03035
Cc02_g37030	GSCOC_T00028045001	Subtilisin-like protease	-1.03024
Cc02_g09740	GSCOC_T00029616001	Uncharacterized protein	-1.0301
Cc05_g11880	GSCOC_T00021258001	Uncharacterized protein	-1.02895
Cc10_g02800	GSCOC_T00024789001	homolog subfamily C member 2	-1.02828
Cc11_g04600	GSCOC_T00004818001	Uncharacterized protein	-1.02633
Cc06_g12630	GSCOC_T00041513001	Respiratory burst oxidase homolog E	-1.0247
Cc11_g11180	GSCOC_T00032477001	Uridine-cytidine kinase C	-1.02464
Cc04_g09530	GSCOC_T00022844001	Heterogeneous nuclear ribonucleo A B	-1.02307
Cc02_g26860	GSCOC_T00024993001	Probable mitochondrial chaperone bcs1	-1.02255
Cc07_g01550	GSCOC_T00039327001	SUPPRESSOR OF GAMMA RESPONSE 1	-1.02104
Cc05_g04820	GSCOC_T00035018001	Glutamate receptor	-1.02049
Cc02_g13650	GSCOC_T00029121001	Auxin-repressed kDa	-1.01999
Cc08_g08870	GSCOC_T00017222001	BURP domain RD22	-1.01939
Cc02_g13420	GSCOC_T00029160001	Probable L-type lectin-domain containing receptor kinase	-1.01889
Cc04_g04320	GSCOC_T00022156001	Uncharacterized protein	-1.01865
Cc05_g04330	GSCOC_T00031655001	L-ascorbate oxidase homolog	-1.01811
Cc05_g07500	GSCOC_T00042280001	Squamosa promoter-binding 4	-1.018
Cc07_g06830	GSCOC_T00040008001	Casein kinase II subunit alpha-1	-1.01798
Cc04_g02900	GSCOC_T00021973001	Pentatricopeptide repeat-containing At1g62350	-1.01777
Cc02_g16340	GSCOC_T00014117001	Uncharacterized protein	-1.01759
Cc06_g19330	GSCOC_T00028993001	Uncharacterized protein	-1.015
Cc04_g08860	GSCOC_T00022761001	BCCIP homolog	-1.01496
Cc04_g02970	GSCOC_T00021981001	PLANT CADMIUM RESISTANCE 8	-1.01479
Cc04_g13530	GSCOC_T00018269001	Alpha-mannosidase I MNS4	-1.01383
Cc00_g00240	GSCOC_T00036101001	UDP-glycosyltransferase 86A1	-1.01383
Cc05_g10410	GSCOC_T00021446001	Pentatricopeptide repeat-containing mitochondrial	-1.01379
Cc04_g07340	GSCOC_T00022547001	F-box LRR-repeat At3g03360	-1.01266
Cc09_g05060	GSCOC_T00007078001	Phosphoribosylglycinamide chloroplastic	-1.01241
Cc11_g12860	GSCOC_T00032256001	Probable calcium-binding CML46	-1.01226
Cc04_g06240	GSCOC_T00022407001	Zinc finger chloroplastic	-1.01195
Cc11_g00560	GSCOC_T00004213001	F-box kelch-repeat At3g06240	-1.01152
Cc02_g23980	GSCOC_T00015104001	Pentatricopeptide repeat-containing chloroplastic	-1.01098
Cc10_g08030	GSCOC_T00034449001	Receptor kinase 5	-1.01066
Cc09_g05070	GSCOC_T00007080001	Cationic amino acid transporter 5	-1.01011
Cc07_g12340	GSCOC_T00036887001	Subtilisin-like protease	-1.00861
Cc02_g39170	GSCOC_T00027754001	Uncharacterized protein	-1.00819
Cc01_g13200	GSCOC_T00028283001	Zinc transporter 1	-1.00738
Cc06_g06330	GSCOC_T00031396001	Uncharacterized protein	-1.0072
Cc02_g15550	GSCOC_T00014009001	Probable WRKY transcription factor 65	-1.00696
Cc02_g35900	GSCOC_T00042775001	Pentatricopeptide repeat-containing chloroplastic	-1.00528
Cc00_g06260	GSCOC_T00010080001	Shikimate O-hydroxycinnamoyltransferase	-1.00422
Cc11_g02600	GSCOC_T00025562001	TIMELESS-interacting	-1.00339
Cc07_g12190	GSCOC_T00036911001	WD repeat-containing 55	-1.00335
Cc02_g37260	GSCOC_T00028017001	Serine arginine-rich splicing factor RS41	-1.00323
Cc06_g01600	GSCOC_T00023385001	BAHD acyltransferase DCR	-1.00149
Cc00_g12290	GSCOC_T00009516001	S-norcoclaurine synthase	-1.00124
Cc03_g12130	GSCOC_T00015283001	Zinc transporter 5	-1.00109
Cc07_g03250	GSCOC_T00039548001	ABC transporter B family member 19	-0.999107
Cc06_g01580	GSCOC_T00023381001	FLUORESCENT IN BLUE chloroplastic	-0.998991
Cc02_g13350	GSCOC_T00029169001	Pentatricopeptide repeat-containing At2g33760	-0.997965
Cc02_g36190	GSCOC_T00006324001	disease resistance RPP13 1	-0.997049
Cc11_g01760	GSCOC_T00019521001	Uncharacterized protein	-0.996492
Cc02_g04110	GSCOC_T00020314001	Uncharacterized protein	-0.996332
Cc02_g18380	GSCOC_T00014379001	Uncharacterized protein	-0.996144
Cc11_g12790	GSCOC_T00032269001	KH domain-containing At4g18375	-0.995768
Cc11_g09560	GSCOC_T00032702001	Uncharacterized amino-acid permease	-0.99522
Cc07_g03200	GSCOC_T00039538001	Probable serine threonine- kinase PIX7	-0.994693
Cc00_g12270	GSCOC_T00008605001	Transcription factor ICE1	-0.993819
Cc02_g11990	GSCOC_T00029345001	G-type lectin S-receptor-like serine threonine- kinase B120	-0.992077
Cc01_g10900	GSCOC_T00024206001	Uncharacterized protein sll0103	-0.991327
Cc02_g32540	GSCOC_T00001232001	Sugar transporter ERD6-like 5	-0.991184
Cc02_g25530	GSCOC_T00028736001	Pentatricopeptide repeat-containing At5g01110	-0.990158
Cc02_g36600	GSCOC_T00003902001	Pentatricopeptide repeat-containing At1g01970	-0.989178
Cc08_g08670	GSCOC_T00009069001	Uncharacterized protein	-0.988811
Cc00_g15210	GSCOC_T00005657001	Phosphoribosylformylglycinamidine cyclo- chloroplastic	-0.988164
Cc05_g01410	GSCOC_T00018219001	Pentatricopeptide repeat-containing At4g21065	-0.986494
Cc01_g11620	GSCOC_T00028066001	Carbamoyl-phosphate synthase large chain	-0.985894
Cc05_g05830	GSCOC_T00035168001	UDP-glucose flavonoid 3-O-glucosyltransferase 3	-0.984958
Cc07_g06540	GSCOC_T00039965001	Xyloglucan galactosyltransferase KATAMARI1 homolog	-0.984502
Cc07_g07800	GSCOC_T00040140001	Uncharacterized protein	-0.983025
Cc06_g04280	GSCOC_T00023742001	4-coumarate-- ligase-like 7	-0.982766
Cc05_g12440	GSCOC_T00021191001	Probable inactive beta-glucosidase 14	-0.98238
Cc09_g04560	GSCOC_T00017411001	Endoglucanase 24	-0.982361
Cc04_g01570	GSCOC_T00021813001	NADH dehydrogenas	-0.982216
Cc10_g05300	GSCOC_T00034827001	Stem-specific TSJT1	-0.982108
Cc09_g01960	GSCOC_T00017741001	RNA pseudouridine synthase chloroplastic	-0.9818
Cc00_g25060	GSCOC_T00002589001	Beta-hexosaminidase subunit B2	-0.981558
Cc01_g14000	GSCOC_T00028385001	Sodium-dependent phosphate transport chloroplastic	-0.981151
Cc10_g03710	GSCOC_T00024907001	Ent-kaurene chloroplastic	-0.981005
Cc11_g02090	GSCOC_T00033028001	Uncharacterized protein	-0.980664
Cc02_g15110	GSCOC_T00013945001	Uncharacterized protein	-0.98051
Cc00_g28750	GSCOC_T00009574001	Gibberellin 20 oxidase 1-B	-0.980388
Cc00_g03730	GSCOC_T00013259001	SRG1	-0.979832
Cc11_g14350	GSCOC_T00032069001	Uncharacterized protein	-0.979732
Cc06_g02000	GSCOC_T00023440001	Copper transporter 2	-0.979348
Cc03_g01660	GSCOC_T00025785001	Glyoxysomal fatty acid beta-oxidation multifunctional MFP-a	-0.978752
Cc00_g18220	GSCOC_T00002581001	50S ribosomal mitochondrial	-0.978038
Cc00_g20950	GSCOC_T00006046001	phosphatase 1 regulatory subunit 7	-0.976873
Cc04_g14690	GSCOC_T00040729001	Serine threonine- kinase At3g51990	-0.976655
Cc11_g04710	GSCOC_T00042898001	Pentatricopeptide repeat-containing mitochondrial	-0.976291
Cc02_g19090	GSCOC_T00014473001	Uncharacterized protein At4g06744	-0.976262
Cc00_g26370	GSCOC_T00002364001	amidase	-0.975997
Cc10_g13480	GSCOC_T00035285001	Uncharacterized protein	-0.973844
Cc04_g06960	GSCOC_T00022497001	LEAF RUST 10 DISEASE-RESISTANCE LOCUS RECEPTOR-LIKE PROTEIN KINASE-like	-0.973717
Cc10_g15000	GSCOC_T00033662001	MDIS1-interacting receptor like kinase 2	-0.973598
Cc07_g03750	GSCOC_T00039620001	Lamin	-0.973168
Cc09_g03490	GSCOC_T00017542001	Uncharacterized protein	-0.972796
Cc02_g28450	GSCOC_T00009425001	Bifunctional dihydroflavonol 4-reductase flavanone 4-reductase	-0.972065
Cc04_g05970	GSCOC_T00022372001	Probable zinc protease	-0.969514
Cc04_g09410	GSCOC_T00022828001	Poly(A) polymerase I	-0.968923
Cc05_g15060	GSCOC_T00038739001	Cellulose synthase E1	-0.96864
Cc07_g03170	GSCOC_T00039535001	Aldose 1-epimerase	-0.968518
Cc01_g10430	GSCOC_T00024139001	Serine carboxypeptidase-like 48	-0.96755
Cc08_g15580	GSCOC_T00035495001	Uncharacterized protein	-0.965063
Cc04_g11740	GSCOC_T00037379001	Primary amine oxidase	-0.964984
Cc03_g07590	GSCOC_T00026614001	Uncharacterized protein	-0.964948
Cc06_g19490	GSCOC_T00029014001	Pentatricopeptide repeat-containing mitochondrial	-0.963809
Cc00_g04270	GSCOC_T00010977001	Uncharacterized protein	-0.963131
Cc02_g34250	GSCOC_T00000662001	60S ribosomal L22-3	-0.961358
Cc04_g04590	GSCOC_T00022189001	Glycerol kinase	-0.960685
Cc10_g12820	GSCOC_T00032011001	Uncharacterized protein	-0.960298
Cc07_g13980	GSCOC_T00036670001	RNA-binding pno1	-0.960075
Cc03_g15240	GSCOC_T00026793001	OTU domain-containing DDB_G0284757	-0.959994
Cc09_g02680	GSCOC_T00017644001	G-type lectin S-receptor-like serine threonine- kinase At1g11303	-0.958179
Cc05_g09290	GSCOC_T00002649001	Transcription termination factor mitochondrial	-0.957759
Cc06_g15720	GSCOC_T00030784001	Thioredoxin-like 3- chloroplastic	-0.956662
Cc06_g18830	GSCOC_T00028912001	Uncharacterized protein At5g39865	-0.95596
Cc06_g08670	GSCOC_T00031100001	Uncharacterized protein	-0.955499
Cc06_g06590	GSCOC_T00031365001	Uncharacterized protein	-0.955282
Cc05_g15530	GSCOC_T00038681001	Probable galactinol--sucrose galactosyltransferase 1	-0.954287
Cc07_g15380	GSCOC_T00036482001	Probable trehalose-phosphate phosphatase J	-0.954122
Cc06_g15060	GSCOC_T00030885001	Probable LRR receptor-like serine threonine- kinase At2g24230	-0.953666
Cc09_g00150	GSCOC_T00017985001	Uncharacterized protein	-0.953161
Cc00_g17430	GSCOC_T00013477001	Isoflavone reductase homolog P3	-0.950826
Cc02_g09360	GSCOC_T00029663001	Transcription factor RF2a	-0.950765
Cc07_g04030	GSCOC_T00039653001	Alpha-	-0.95076
Cc02_g33850	GSCOC_T00008629001	Small nuclear ribonucleo Sm D3	-0.949455
Cc09_g07170	GSCOC_T00036306001	Reticuline oxidase	-0.949303
Cc03_g06780	GSCOC_T00026497001	Uncharacterized protein	-0.947934
Cc04_g13290	GSCOC_T00012381001	Uncharacterized protein	-0.94787
Cc06_g02160	GSCOC_T00023463001	Uncharacterized protein	-0.947167
Cc02_g05310	GSCOC_T00039036001	Pentatricopeptide repeat-containing At2g40720	-0.947029
Cc06_g16150	GSCOC_T00030732001	Uncharacterized protein	-0.946715
Cc08_g10810	GSCOC_T00027060001	Heat shock factor HSF30	-0.946103
Cc10_g04230	GSCOC_T00034961001	Polcalcin Jun o 2	-0.945345
Cc10_g04260	GSCOC_T00034956001	BRI1 kinase inhibitor 1	-0.944878
Cc01_g00050	GSCOC_T00012435001	Uncharacterized protein	-0.944328
Cc10_g03310	GSCOC_T00024854001	Geranylgeranyl pyrophosphate chloroplastic	-0.944296
Cc11_g09240	GSCOC_T00032763001	DETOXIFICATION 2	-0.943489
Cc05_g08560	GSCOC_T00016880001	Xyloglucan endotransglucosylase hydrolase 15	-0.943377
Cc07_g05900	GSCOC_T00039876001	Methionine aminopeptidase chloroplastic mitochondrial	-0.94305
Cc02_g32600	GSCOC_T00001218001	Uncharacterized protein	-0.942606
Cc10_g08790	GSCOC_T00034340001	Pentatricopeptide repeat-containing At3g12770	-0.942414
Cc08_g01540	GSCOC_T00038371001	Poly(U)-specific endoribonuclease-B	-0.941239
Cc00_g14200	GSCOC_T00009214001	Probable tRNA (guanine(26)-N(2))-dimethyltransferase 1	-0.940882
Cc02_g00770	GSCOC_T00019871001	Flavanone 3-dioxygenase	-0.939079
Cc06_g03030	GSCOC_T00023573001	Auxin-induced 5NG4	-0.938449
Cc08_g06480	GSCOC_T00036038001	Probable sarcosine oxidase	-0.938016
Cc11_g05510	GSCOC_T00020509001	phagocytic receptor 1b	-0.937954
Cc11_g06240	GSCOC_T00020628001	Uncharacterized protein	-0.937406
Cc02_g34440	GSCOC_T00000689001	Pentatricopeptide repeat-containing mitochondrial	-0.936938
Cc00_g22260	GSCOC_T00007435001	33 kDa chloroplastic	-0.936804
Cc11_g04630	GSCOC_T00004822001	Uncharacterized protein	-0.935956
Cc09_g00420	GSCOC_T00017952001	Oligopeptide transporter 3	-0.935356
Cc05_g10800	GSCOC_T00021396001	Uncharacterized protein	-0.934453
Cc03_g03960	GSCOC_T00026097001	Uncharacterized protein	-0.934248
Cc03_g14430	GSCOC_T00026660001	Cysteine chloroplastic chromoplastic	-0.933835
Cc01_g07360	GSCOC_T00030170001	Molybdopterin synthase catalytic subunit	-0.933001
Cc07_g09440	GSCOC_T00037242001	Cytochrome P450 90B1	-0.932584
Cc03_g02620	GSCOC_T00025917001	Uridine nucleosidase 1	-0.932169
Cc07_g09760	GSCOC_T00037200001	Isoflavone reductase homolog	-0.932138
Cc11_g10560	GSCOC_T00032561001	AP2 ERF and B3 domain-containing transcription repressor TEM1	-0.932108
Cc01_g10770	GSCOC_T00024183001	OTU domain-containing DDB_G0284757	-0.932092
Cc02_g02000	GSCOC_T00020042001	Uncharacterized protein	-0.931983
Cc01_g11610	GSCOC_T00028065001	LOB domain-containing 1	-0.930228
Cc05_g14320	GSCOC_T00038832001	65-kDa microtubule-associated 1	-0.930158
Cc02_g35220	GSCOC_T00042880001	Uncharacterized protein	-0.929884
Cc04_g07600	GSCOC_T00022590001	Translation initiation factor eIF-2B subunit delta	-0.929793
Cc08_g09710	GSCOC_T00026917001	GATA transcription factor 12	-0.927914
Cc06_g11800	GSCOC_T00041614001	Uncharacterized protein	-0.927056
Cc04_g05800	GSCOC_T00022347001	Phosphatidylinositol transfer 3	-0.926874
Cc05_g12710	GSCOC_T00021156001	Myosin-2 heavy chain	-0.92646
Cc11_g14990	GSCOC_T00001032001	Glycine--tRNA mitochondrial 1	-0.926194
Cc11_g08730	GSCOC_T00032833001	Uncharacterized protein	-0.925986
Cc02_g10810	GSCOC_T00029488001	Uncharacterized protein	-0.9258
Cc07_g09650	GSCOC_T00037214001	U-box domain-containing 5	-0.925088
Cc02_g03630	GSCOC_T00020253001	Carboxylesterase 1	-0.924808
Cc07_g08720	GSCOC_T00040260001	Chloroplastic group IIB intron splicing facilitator chloroplastic	-0.924518
Cc01_g09860	GSCOC_T00024056001	Histone deacetylase HDT1	-0.923808
Cc00_g22590	GSCOC_T00003321001	Thebaine 6-O-demethylase	-0.922574
Cc06_g11030	GSCOC_T00041705001	Phospholipase A2-beta	-0.92245
Cc02_g18390	GSCOC_T00014380001	Uncharacterized protein	-0.92081
Cc07_g16670	GSCOC_T00037533001	Uncharacterized protein	-0.920796
Cc00_g09440	GSCOC_T00008030001	Rop guanine nucleotide exchange factor 1	-0.920693
Cc04_g06540	GSCOC_T00022443001	Uncharacterized protein	-0.920361
Cc07_g06660	GSCOC_T00039983001	Katanin p80 WD40 repeat-containing subunit B1	-0.920049
Cc05_g13940	GSCOC_T00020996001	Tetraacyldisaccharide 4 -kinase	-0.919869
Cc06_g11970	GSCOC_T00041592001	40S ribosomal S3-3	-0.91986
Cc04_g05840	GSCOC_T00022351001	Uncharacterized protein	-0.91976
Cc00_g00420	GSCOC_T00036127001	Arginine decarboxylase	-0.91967
Cc07_g11140	GSCOC_T00037034001	Pentatricopeptide repeat-containing At3g51320	-0.919078
Cc02_g31620	GSCOC_T00027521001	Serine threonine- kinase WNK1	-0.918747
Cc05_g14290	GSCOC_T00038836001	Uncharacterized protein	-0.918361
Cc02_g31780	GSCOC_T00027494001	Pollen-specific SF21	-0.918159
Cc01_g09850	GSCOC_T00024055001	Histone deacetylase HDT1	-0.918122
Cc03_g14390	GSCOC_T00026651001	FAM136A	-0.918116
Cc06_g14520	GSCOC_T00041247001	Serine carboxypeptidase-like 29	-0.918066
Cc02_g12260	GSCOC_T00029307001	Equilibrative nucleoside transporter 4	-0.917989
Cc09_g05190	GSCOC_T00007093001	GTP-binding ERG	-0.917223
Cc06_g06600	GSCOC_T00031364001	BEL1-like homeodomain 6	-0.916237
Cc05_g00360	GSCOC_T00017067001	Pentatricopeptide repeat-containing At3g59040	-0.91607
Cc06_g04820	GSCOC_T00043005001	Aspartic ase nepenthesin-1	-0.915863
Cc07_g14600	GSCOC_T00036596001	Homeobox-leucine zipper ATHB-6	-0.915648
Cc03_g10250	GSCOC_T00031035001	Transcription factor bHLH128	-0.915543
Cc09_g00690	GSCOC_T00017914001	Inositol transporter 4	-0.915044
Cc02_g26750	GSCOC_T00024978001	Uncharacterized protein	-0.914661
Cc02_g09190	GSCOC_T00029690001	Pentatricopeptide repeat-containing At3g14330	-0.914605
Cc08_g14140	GSCOC_T00030261001	60S ribosomal L24	-0.914259
Cc06_g16430	GSCOC_T00030694001	Exo-poly-alpha-D-galacturonosidase	-0.91345
Cc02_g11890	GSCOC_T00029359001	Pentatricopeptide repeat-containing mitochondrial	-0.91297
Cc07_g06450	GSCOC_T00039953001	Transcription factor MYB44	-0.912243
Cc02_g34460	GSCOC_T00000694001	F-box PP2-B15	-0.91209
Cc01_g04150	GSCOC_T00039285001	Multiple C2 and transmembrane domain-containing 1	-0.911129
Cc02_g34400	GSCOC_T00000681001	F-box LRR-repeat 3	-0.910475
Cc01_g05010	GSCOC_T00028585001	Uncharacterized protein	-0.91022
Cc01_g09100	GSCOC_T00023954001	Biogenesis of lysosome-related organelles complex 1 subunit 1	-0.909858
Cc06_g04120	GSCOC_T00023719001	RNA polymerase sigma factor	-0.909391
Cc08_g05130	GSCOC_T00042444001	Uncharacterized protein	-0.909023
Cc05_g00090	GSCOC_T00017027001	Uncharacterized protein	-0.906515
Cc04_g05830	GSCOC_T00022350001	Glycine--tRNA mitochondrial 1	-0.906458
Cc02_g04740	GSCOC_T00020396001	Ethylene-responsive transcription factor 2	-0.90262
Cc02_g24310	GSCOC_T00002340001	lipid-binding At4g00165	-0.902494
Cc03_g02190	GSCOC_T00025857001	Monothiol glutaredoxin-S10	-0.901203
Cc01_g18980	GSCOC_T00016120001	Pentatricopeptide repeat-containing chloroplastic	-0.90074
Cc02_g34760	GSCOC_T00011783001	Exonuclease mut-7 homolog	-0.89969
Cc11_g13960	GSCOC_T00032120001	TORTIFOLIA1 1	-0.899559
Cc05_g12210	GSCOC_T00021220001	Choline transporter 2	-0.899021
Cc05_g12670	GSCOC_T00021160001	Cytochrome c-type biogenesis ccda-like chloroplastic 2	-0.898867
Cc07_g13390	GSCOC_T00036742001	Glucan endo-	-0.898038
Cc11_g15360	GSCOC_T00038046001	CRS2-associated factor chloroplastic	-0.897983
Cc02_g02160	GSCOC_T00020063001	ATPase family AAA domain-containing 1-A	-0.897041
Cc02_g27240	GSCOC_T00025049001	Beta-glucosidase 10	-0.896927
Cc06_g03970	GSCOC_T00023698001	29 kDa ribonucleo chloroplastic	-0.896219
Cc02_g34060	GSCOC_T00000637001	Transcription factor bHLH19	-0.895951
Cc10_g00690	GSCOC_T00024526001	Pre-rRNA-processing TSR1 homolog	-0.895549
Cc10_g05960	GSCOC_T00034731001	Pentatricopeptide repeat-containing chloroplastic	-0.895147
Cc06_g13860	GSCOC_T00041337001	Uncharacterized protein	-0.89462
Cc06_g08820	GSCOC_T00031083001	Pentatricopeptide repeat-containing chloroplastic	-0.894442
Cc04_g09030	GSCOC_T00022780001	Mitochondrial import inner membrane translocase subunit TIM14	-0.892725
Cc02_g34750	GSCOC_T00011781001	Guanosine-5 -triphosphat	-0.892121
Cc06_g20840	GSCOC_T00015863001	CHLOROPLAST IMPORT APPARATUS 2	-0.891563
Cc02_g36000	GSCOC_T00042762001	Transcription factor MYB86	-0.890779
Cc06_g19050	GSCOC_T00028954001	Benzyl alcohol O-benzoyltransferase	-0.890266
Cc01_g01990	GSCOC_T00019283001	Heat shock cognate 70 kDa	-0.889823
Cc00_g14900	GSCOC_T00008042001	DNA annealing helicase and endonuclease ZRANB3	-0.889719
Cc09_g04170	GSCOC_T00017459001	30S ribosomal S5	-0.889633
Cc01_g20230	GSCOC_T00015958001	Protease Do-like chloroplastic	-0.888622
Cc10_g07670	GSCOC_T00034493001	Uncharacterized protein	-0.888288
Cc01_g11430	GSCOC_T00024273001	Uncharacterized protein	-0.887817
Cc01_g05020	GSCOC_T00028586001	Uncharacterized protein	-0.887375
Cc04_g17040	GSCOC_T00035826001	Pectinesterase 1	-0.887242
Cc02_g29600	GSCOC_T00018400001	Uncharacterized protein	-0.887099
Cc00_g27390	GSCOC_T00006767001	disease resistance RGA4	-0.886547
Cc03_g01420	GSCOC_T00025754001	Uncharacterized protein	-0.884922
Cc08_g08200	GSCOC_T00007250001	60S ribosomal L5	-0.884782
Cc03_g05520	GSCOC_T00026309001	Transcription factor MYB4	-0.882664
Cc09_g05050	GSCOC_T00007077001	Cationic amino acid transporter 5	-0.881242
Cc09_g00430	GSCOC_T00017951001	Uncharacterized protein	-0.881212
Cc02_g14060	GSCOC_T00029062001	MLO 6	-0.881102
Cc06_g22960	GSCOC_T00040646001	H ACA ribonucleo complex subunit 1 1	-0.88097
Cc00_g05640	GSCOC_T00011948001	amidase	-0.879938
Cc10_g04590	GSCOC_T00034917001	Subtilisin-like protease	-0.879802
Cc00_g25560	GSCOC_T00012894001	disease resistance RGA3	-0.879313
Cc07_g09630	GSCOC_T00037217001	ATPase family AAA domain-containing 3	-0.879062
Cc02_g39570	GSCOC_T00027697001	Uncharacterized protein	-0.878965
Cc11_g08300	GSCOC_T00032894001	Uncharacterized protein	-0.878634
Cc02_g23760	GSCOC_T00015079001	DNA polymerase III subunit gamma tau	-0.878332
Cc09_g02690	GSCOC_T00017643001	G-type lectin S-receptor-like serine threonine- kinase SD1-13	-0.878032
Cc09_g01990	GSCOC_T00017737001	Transmembrane 115	-0.876874
Cc04_g02790	GSCOC_T00021960001	Uncharacterized protein	-0.876839
Cc00_g16260	GSCOC_T00011524001	Uncharacterized protein	-0.876821
Cc04_g01390	GSCOC_T00021789001	ELF4-LIKE 4	-0.874978
Cc01_g15580	GSCOC_T00016545001	Uncharacterized protein	-0.873935
Cc01_g16890	GSCOC_T00016389001	XRI1	-0.873194
Cc09_g02540	GSCOC_T00017664001	Sporulation RMD1	-0.873176
Cc00_g12590	GSCOC_T00011634001	Cytochrome P450 81D1	-0.871797
Cc00_g10990	GSCOC_T00000137001	Secologanin synthase	-0.871037
Cc07_g03670	GSCOC_T00039611001	Ethylene-responsive transcription factor RAP2-11	-0.870631
Cc01_g14150	GSCOC_T00028406001	RING-H2 finger ATL48	-0.870266
Cc08_g07000	GSCOC_T00025292001	BTB POZ domain-containing NPY1	-0.870257
Cc05_g10310	GSCOC_T00021467001	Polyphenol oxidase chloroplastic	-0.869744
Cc02_g03490	GSCOC_T00020234001	Uncharacterized protein	-0.869286
Cc02_g33300	GSCOC_T00015357001	Zinc finger chloroplastic	-0.868856
Cc01_g13290	GSCOC_T00028294001	chloroplastic	-0.868779
Cc07_g12380	GSCOC_T00036880001	Kinesin KIN-14E	-0.867359
Cc10_g07860	GSCOC_T00034472001	Endo-	-0.867141
Cc00_g34700	GSCOC_T00012667001	Glycine-rich RNA-binding GRP1A	-0.866704
Cc01_g04740	GSCOC_T00015825001	Serine threonine- kinase OXI1	-0.866372
Cc00_g14300	GSCOC_T00010613001	Basic endochitinase	-0.865833
Cc11_g03900	GSCOC_T00033999001	Uncharacterized protein	-0.865067
Cc11_g15460	GSCOC_T00038057001	Cysteine-rich receptor kinase 3	-0.86495
Cc09_g06020	GSCOC_T00033374001	Chaperonin 60 subunit alpha chloroplastic	-0.864554
Cc05_g05760	GSCOC_T00035156001	UDP-glucose flavonoid 3-O-glucosyltransferase 3	-0.863835
Cc11_g11440	GSCOC_T00032445001	UDP-glycosyltransferase 89A2	-0.863782
Cc01_g14910	GSCOC_T00028512001	Cation H(+) antiporter 15	-0.863567
Cc03_g16050	GSCOC_T00001672001	Uncharacterized protein	-0.863071
Cc01_g20090	GSCOC_T00015975001	U3 small nucleolar RNA-associated 15 homolog	-0.861902
Cc01_g14040	GSCOC_T00028391001	Uncharacterized protein	-0.861032
Cc02_g23990	GSCOC_T00015105001	NSP-INTERACTING KINASE 2	-0.860774
Cc05_g16000	GSCOC_T00038616001	WD repeat-containing 75	-0.860474
Cc05_g06520	GSCOC_T00042143001	Pentatricopeptide repeat-containing At1g73710	-0.86023
Cc03_g03810	GSCOC_T00026081001	Ferredoxin-1	-0.858031
Cc05_g15140	GSCOC_T00038725001	DNA-directed RNA polymerases I and III subunit RPAC1	-0.856809
Cc06_g10640	GSCOC_T00041753001	Glucan endo-	-0.856709
Cc00_g09950	GSCOC_T00013623001	disease resistance RGA4	-0.856579
Cc06_g00890	GSCOC_T00023292001	Ferritin- chloroplastic	-0.855869
Cc04_g13860	GSCOC_T00035901001	Metal tolerance A2	-0.855839
Cc08_g13140	GSCOC_T00030377001	Flavonoid 3 -monooxygenase	-0.85501
Cc11_g13700	GSCOC_T00032149001	Glutathione S-transferase U17	-0.854632
Cc09_g01740	GSCOC_T00017770001	Uncharacterized protein At5g41620	-0.854556
Cc04_g08610	GSCOC_T00022727001	Disease resistance RPP13	-0.854349
Cc05_g14830	GSCOC_T00038773001	Zinc transporter 2	-0.852693
Cc06_g22750	GSCOC_T00040674001	Probable S-acyltransferase 4	-0.851668
Cc02_g37890	GSCOC_T00027932001	Serine threonine- kinase TNNI3K	-0.851491
Cc02_g23660	GSCOC_T00015068001	Methionine S-methyltransferase	-0.851068
Cc04_g04860	GSCOC_T00022225001	Uncharacterized protein	-0.85023
Cc06_g02120	GSCOC_T00023455001	Uncharacterized protein	-0.849709
Cc07_g11950	GSCOC_T00036937001	Pentatricopeptide repeat-containing mitochondrial	-0.849397
Cc10_g06860	GSCOC_T00034603001	Uncharacterized protein	-0.849257
Cc02_g35040	GSCOC_T00011816001	Nicotianamine synthase	-0.849247
Cc07_g14020	GSCOC_T00036665001	U-box domain-containing 50	-0.847332
Cc00_g02840	GSCOC_T00011551001	Uncharacterized protein	-0.847212
Cc08_g10760	GSCOC_T00027054001	Beta- insoluble isoenzyme CWINV1	-0.846984
Cc04_g13800	GSCOC_T00035887001	EXECUTER chloroplastic	-0.846947
Cc07_g10540	GSCOC_T00037102001	Histone H1	-0.846683
Cc02_g21930	GSCOC_T00014843001	Phosphatidylserine decarboxylase proenzyme 3	-0.845774
Cc07_g07850	GSCOC_T00040147001	Uncharacterized protein	-0.844948
Cc10_g02660	GSCOC_T00024772001	Isoflavone reductase homolog P3	-0.844547
Cc06_g05590	GSCOC_T00043117001	Solute carrier family 35 member F1	-0.844493
Cc06_g18120	GSCOC_T00040416001	Probable calcium-binding CML49	-0.844446
Cc03_g03270	GSCOC_T00026009001	Uncharacterized protein	-0.843639
Cc05_g08000	GSCOC_T00016806001	Transcription factor VIP1	-0.843074
Cc07_g11080	GSCOC_T00037041001	Ubiquitin-conjugating enzyme E2 28	-0.842768
Cc02_g27520	GSCOC_T00025082001	Transcription factor bHLH130	-0.840883
Cc03_g02120	GSCOC_T00025847001	GTPase Obg	-0.839738
Cc08_g12670	GSCOC_T00030446001	Scarecrow 6	-0.838336
Cc01_g01000	GSCOC_T00038000001	Pentatricopeptide repeat-containing At4g37170	-0.838265
Cc11_g15970	GSCOC_T00038125001	Uncharacterized protein	-0.837604
Cc07_g12890	GSCOC_T00036818001	B3 domain-containing REM17	-0.83759
Cc04_g04330	GSCOC_T00022157001	Methyl- -binding domain-containing 10	-0.837416
Cc01_g11460	GSCOC_T00024276001	Uncharacterized protein	-0.837059
Cc11_g02660	GSCOC_T00025550001	Probable LRR receptor-like serine threonine- kinase At3g47570	-0.836357
Cc10_g01760	GSCOC_T00024663001	tRNA (adenine(58)-N(1))-methyltransferase non-catalytic subunit trm6	-0.836338
Cc05_g07960	GSCOC_T00016801001	GTP-binding homolog	-0.835374
Cc10_g09820	GSCOC_T00031496001	Germin subfamily 1 member 13	-0.835257
Cc05_g00800	GSCOC_T00013171001	Hevamine-A	-0.835231
Cc00_g25920	GSCOC_T00006245001	Uncharacterized protein	-0.834935
Cc11_g03390	GSCOC_T00025420001	Isoflavone reductase homolog	-0.834439
Cc02_g35000	GSCOC_T00011810001	Lon protease mitochondrial	-0.834062
Cc07_g10690	GSCOC_T00037085001	WEB family At2g17940	-0.834003
Cc03_g08330	GSCOC_T00033237001	Uncharacterized protein	-0.833951
Cc09_g03850	GSCOC_T00017496001	Flavonol sulfotransferase-like	-0.832189
Cc03_g01830	GSCOC_T00025810001	ABC transporter C family member 4	-0.831859
Cc01_g07520	GSCOC_T00009387001	Probable inactive receptor kinase At5g10020	-0.831632
Cc03_g15660	GSCOC_T00026858001	NADPH-dependent oxidoreductase 2-alkenal reductase	-0.831555
Cc03_g14560	GSCOC_T00026674001	disease resistance RGA4	-0.831332
Cc11_g12840	GSCOC_T00032259001	Transcription termination factor mitochondrial	-0.831275
Cc02_g35190	GSCOC_T00042888001	Pentatricopeptide repeat-containing At5g66520	-0.831201
Cc02_g04160	GSCOC_T00020319001	NAC domain-containing 7	-0.831145
Cc05_g13240	GSCOC_T00021089001	Uncharacterized protein	-0.83111
Cc07_g05720	GSCOC_T00039852001	Upstream activation factor subunit UAF30	-0.82988
Cc09_g01900	GSCOC_T00017748001	Probable cardiolipin synthase (CMP-forming)	-0.829854
Cc10_g05230	GSCOC_T00034837001	Isoflavone 2 -hydroxylase	-0.829845
Cc09_g02370	GSCOC_T00017686001	Cytochrome P450 86B1	-0.829523
Cc10_g06450	GSCOC_T00034654001	Hypoxanthine-guanine phosphoribosyltransferase	-0.829412
Cc11_g09920	GSCOC_T00032650001	Glutamine--tRNA ligase	-0.828909
Cc00_g12750	GSCOC_T00001612001	Shikimate O-hydroxycinnamoyltransferase	-0.828312
Cc07_g03710	GSCOC_T00039616001	Uncharacterized protein	-0.828047
Cc08_g00700	GSCOC_T00038480001	Glycerol-3-phosphate acyltransferase 3	-0.82757
Cc02_g17290	GSCOC_T00014240001	Diaminopimelate decarboxylase chloroplastic	-0.827316
Cc01_g12190	GSCOC_T00028146001	Pentatricopeptide repeat-containing mitochondrial	-0.827188
Cc10_g08520	GSCOC_T00034379001	Neuroguidin	-0.826599
Cc05_g00770	GSCOC_T00013168001	Acidic endochitinase	-0.826095
Cc11_g08290	GSCOC_T00032897001	DELLA GAI1	-0.825765
Cc04_g10810	GSCOC_T00042654001	Protein tipD	-0.825286
Cc04_g08670	GSCOC_T00022738001	Cysteine-rich receptor kinase 10	-0.825057
Cc05_g10860	GSCOC_T00021388001	Probable leucine-rich repeat receptor-like serine threonine- kinase At3g14840	-0.824395
Cc11_g05440	GSCOC_T00020500001	Protein phagocytic receptor 1b	-0.824335
Cc02_g21850	GSCOC_T00014834001	mRNA decay activator ZFP36L1	-0.824329
Cc07_g04150	GSCOC_T00039667001	Uncharacterized protein	-0.822712
Cc06_g07590	GSCOC_T00031243001	Uncharacterized protein	-0.821715
Cc06_g10430	GSCOC_T00041780001	ABC transporter B family member 8	-0.821545
Cc06_g10930	GSCOC_T00041716001	60S ribosomal L31	-0.821482
Cc08_g16040	GSCOC_T00035552001	Mitochondrial inner membrane OXA1	-0.820999
Cc02_g22270	GSCOC_T00014894001	mRNA turnover 4 homolog	-0.820816
Cc09_g05780	GSCOC_T00033416001	Pentatricopeptide repeat-containing mitochondrial	-0.820801
Cc07_g17010	GSCOC_T00037486001	Auxin-induced 5NG4	-0.820605
Cc09_g01690	GSCOC_T00017776001	tRNA wybutosine-synthesizing 2 3 4	-0.819645
Cc00_g19100	GSCOC_T00000781001	Subtilisin-like protease	-0.819532
Cc07_g15250	GSCOC_T00036501001	Methionine aminotransferase	-0.819348
Cc05_g12970	GSCOC_T00021119001	Uncharacterized protein	-0.818977
Cc09_g02740	GSCOC_T00017635001	Pentatricopeptide repeat-containing At5g39710	-0.818946
Cc02_g31950	GSCOC_T00027468001	UDP-glycosyltransferase 83A1	-0.818025
Cc03_g05310	GSCOC_T00026280001	Deacetoxyvindoline 4-hydroxylase	-0.817978
Cc00_g21500	GSCOC_T00008526001	UDP-glucose flavonoid 3-O-glucosyltransferase 6	-0.816891
Cc10_g12670	GSCOC_T00031986001	translocase subunit chloroplastic	-0.81556
Cc05_g04350	GSCOC_T00031660001	Arogenate dehydratase chloroplastic	-0.81398
Cc02_g27680	GSCOC_T00025102001	Uncharacterized protein	-0.81343
Cc04_g17250	GSCOC_T00013575001	Probable mitochondrial chaperone BCS1-B	-0.812953
Cc06_g18920	GSCOC_T00028931001	Two-component response regulator ARR9	-0.812772
Cc05_g10820	GSCOC_T00021394001	Probable leucine-rich repeat receptor-like serine threonine- kinase At3g14840	-0.810863
Cc09_g03590	GSCOC_T00017527001	Uncharacterized protein	-0.810634
Cc04_g10640	GSCOC_T00042627001	Exosome complex component RRP45	-0.809803
Cc09_g01070	GSCOC_T00017861001	Ubiquinol oxidase chloroplastic chromoplastic	-0.808863
Cc07_g03490	GSCOC_T00039583001	Expansin-A15	-0.808769
Cc02_g37270	GSCOC_T00028014001	U-box domain-containing 4	-0.808709
Cc02_g21940	GSCOC_T00014844001	Phosphatidylserine decarboxylase proenzyme 3	-0.808247
Cc00_g34010	GSCOC_T00006265001	UDP-glucose flavonoid 3-O-glucosyltransferase 3	-0.807768
Cc08_g04400	GSCOC_T00034265001	Cadmium-induced AS8	-0.807122
Cc09_g00460	GSCOC_T00017947001	Uncharacterized protein	-0.8066
Cc06_g23290	GSCOC_T00040593001	Uncharacterized protein	-0.806372
Cc06_g03110	GSCOC_T00023583001	Uncharacterized protein	-0.806311
Cc05_g14700	GSCOC_T00038789001	Transcription termination factor mitochondrial	-0.806053
Cc09_g07460	GSCOC_T00036253001	Reticuline oxidase	-0.805061
Cc11_g12630	GSCOC_T00032291001	Uncharacterized protein	-0.804373
Cc02_g28790	GSCOC_T00018168001	Uncharacterized protein	-0.804064
Cc06_g07910	GSCOC_T00031197001	Probable sucrose-phosphate synthase	-0.804013
Cc11_g11300	GSCOC_T00032463001	chloroplastic	-0.803962
Cc07_g20470	GSCOC_T00015712001	60S ribosomal L4	-0.803947
Cc05_g06350	GSCOC_T00042121001	Uncharacterized protein	-0.803395
Cc09_g10070	GSCOC_T00041094001	Pentatricopeptide repeat-containing chloroplastic	-0.803358
Cc11_g03880	GSCOC_T00033997001	Pentatricopeptide repeat-containing chloroplastic	-0.803017
Cc07_g04120	GSCOC_T00039663001	Uncharacterized protein	-0.802887
Cc03_g02480	GSCOC_T00025894001	Pentatricopeptide repeat-containing mitochondrial	-0.802838
Cc11_g10280	GSCOC_T00032598001	DNA (cytosine-5)-methyltransferase CMT2	-0.80267
Cc02_g13530	GSCOC_T00029138001	Telomerase-binding EST1A	-0.80259
Cc08_g01470	GSCOC_T00038382001	Pentatricopeptide repeat-containing At3g16610	-0.80162
Cc05_g08120	GSCOC_T00016823001	Uncharacterized protein	-0.799987
Cc04_g08990	GSCOC_T00022775001	Probable cyclic nucleotide-gated ion channel chloroplastic	-0.799401
Cc07_g17870	GSCOC_T00018834001	Histone-lysine N-methyltransferase 2C	-0.799381
Cc03_g08490	GSCOC_T00033270001	Adenosylhomocysteinase	-0.799364
Cc02_g16810	GSCOC_T00014179001	Uncharacterized protein	-0.798988
Cc02_g04440	GSCOC_T00020357001	Uncharacterized protein	-0.796951
Cc02_g09320	GSCOC_T00029669001	Pentatricopeptide repeat-containing mitochondrial	-0.796835
Cc04_g16480	GSCOC_T00035750001	Probable calcium-binding CML46	-0.796827
Cc07_g10730	GSCOC_T00037081001	Snakin-2	-0.796525
Cc04_g08850	GSCOC_T00022760001	BCCIP homolog	-0.796216
Cc05_g12580	GSCOC_T00021171001	Uncharacterized protein YnbB	-0.796196
Cc00_g06580	GSCOC_T00005835001	Transcription factor TCP8	-0.796036
Cc01_g08380	GSCOC_T00015544001	Lysosomal beta glucosidase	-0.795666
Cc00_g22770	GSCOC_T00007863001	Uncharacterized protein	-0.794656
Cc11_g04040	GSCOC_T00034028001	Acidic endochitinase	-0.794001
Cc08_g01880	GSCOC_T00037641001	UMP-CMP kinase 3	-0.79395
Cc08_g05610	GSCOC_T00024342001	Probable carotenoid cleavage dioxygenase chloroplastic	-0.79379
Cc07_g06930	GSCOC_T00040023001	Queuosine salvage	-0.793673
Cc01_g03070	GSCOC_T00019040001	Serine threonine- kinase PBS1	-0.793455
Cc02_g12920	GSCOC_T00029221001	Uncharacterized protein At4g19900	-0.793088
Cc11_g11430	GSCOC_T00032446001	UDP-glycosyltransferase 89A2	-0.793031
Cc04_g06390	GSCOC_T00022425001	Peptidyl-prolyl cis-trans isomerase FKBP17- chloroplastic	-0.791372
Cc01_g21110	GSCOC_T00005021001	Ethylene receptor 1	-0.790995
Cc11_g15440	GSCOC_T00038055001	2-phytyl-	-0.790397
Cc10_g00590	GSCOC_T00024516001	Uncharacterized protein	-0.790147
Cc09_g04480	GSCOC_T00017420001	Membrane-bound transcription factor site-2 protease	-0.789609
Cc08_g12810	GSCOC_T00030427001	Oxysterol-binding -related 2A	-0.789215
Cc06_g08340	GSCOC_T00031144001	Uncharacterized protein	-0.78897
Cc09_g06130	GSCOC_T00033358001	Glutathionyl-hydroquinone reductase	-0.788773
Cc08_g14040	GSCOC_T00030272001	F-box PP2-A12	-0.788132
Cc02_g07900	GSCOC_T00029877001	Very-long-chain enoyl- reductase	-0.787807
Cc09_g06780	GSCOC_T00005136001	argonaute 3	-0.787727
Cc09_g04760	GSCOC_T00017385001	Pentatricopeptide repeat-containing At5g66520	-0.786943
Cc07_g11480	GSCOC_T00036997001	Cation H(+) antiporter 15	-0.786289
Cc11_g06260	GSCOC_T00020632001	Histidine kinase 4	-0.786156
Cc09_g01640	GSCOC_T00017783001	Soluble starch synthase chloroplastic amyloplastic	-0.786067
Cc01_g17440	GSCOC_T00016324001	Chaperonin CPN60- mitochondrial	-0.785212
Cc01_g19010	GSCOC_T00016114001	Zinc finger NUTCRACKER	-0.784294
Cc06_g20300	GSCOC_T00022952001	Peptidyl-prolyl cis-trans isomerase FKBP65	-0.783427
Cc08_g15430	GSCOC_T00035472001	50S ribosomal L25	-0.782508
Cc02_g10350	GSCOC_T00029538001	Uncharacterized protein HI_0077	-0.782175
Cc07_g15820	GSCOC_T00036422001	Alanine--glyoxylate aminotransferase 2 homolog mitochondrial	-0.781886
Cc09_g03040	GSCOC_T00017597001	Uncharacterized protein	-0.781781
Cc05_g08630	GSCOC_T00016890001	Pentatricopeptide repeat-containing At2g41080	-0.781632
Cc08_g04330	GSCOC_T00034255001	Isoflavone reductase homolog	-0.78159
Cc09_g03030	GSCOC_T00017598001	Uncharacterized protein	-0.781443
Cc04_g09720	GSCOC_T00000093001	Uncharacterized protein	-0.780748
Cc00_g18210	GSCOC_T00002580001	GPI mannosyltransferase 2	-0.780389
Cc06_g18240	GSCOC_T00040431001	Glucan endo-	-0.779305
Cc02_g17450	GSCOC_T00014261001	homolog subfamily C member 2	-0.778962
Cc10_g15370	GSCOC_T00033715001	Type I inositol polyphosphate 5-phosphatase 1	-0.777867
Cc08_g06990	GSCOC_T00025290001	Phospholipase D Y	-0.77784
Cc10_g09680	GSCOC_T00031513001	Uncharacterized protein	-0.777392
Cc11_g16050	GSCOC_T00038134001	Endoglucanase E1	-0.77668
Cc05_g14710	GSCOC_T00038788001	Uncharacterized protein	-0.776447
Cc08_g00990	GSCOC_T00038442001	Uncharacterized protein	-0.776037
Cc00_g10540	GSCOC_T00001814001	60S ribosome subunit biogenesis NIP7 homolog	-0.775346
Cc07_g07640	GSCOC_T00040115001	LRR receptor-like serine threonine- kinase HSL2	-0.775167
Cc02_g09270	GSCOC_T00029679001	Uncharacterized protein At2g3979	-0.774973
Cc05_g07670	GSCOC_T00016764001	DDB1- and CUL4-associated factor 13	-0.774194
Cc02_g13410	GSCOC_T00029161001	Uncharacterized protein	-0.774144
Cc06_g19950	GSCOC_T00022884001	Uncharacterized protein	-0.774034
Cc04_g14330	GSCOC_T00004335001	Probable serine threonine- kinase At1g54610	-0.77401
Cc06_g03960	GSCOC_T00023697001	Cytokinin riboside 5 -monophosphate phosphoribohydrolase LOG1	-0.773929
Cc09_g05380	GSCOC_T00007120001	Ribosome production factor 2 homolog	-0.773786
Cc02_g32440	GSCOC_T00001246001	Receptor-like cytosolic serine threonine- kinase RBK2	-0.773545
Cc00_g00600	GSCOC_T00036154001	LEAF RUST 10 DISEASE-RESISTANCE LOCUS RECEPTOR-LIKE PROTEIN KINASE-like	-0.77311
Cc11_g05190	GSCOC_T00020460001	Glutamate decarboxylase	-0.772941
Cc08_g06890	GSCOC_T00025236001	Cytosolic sulfotransferase 15	-0.772757
Cc02_g05990	GSCOC_T00039121001	Abscisic acid receptor PYL4	-0.772572
Cc11_g09360	GSCOC_T00032744001	E3 ubiquitin- ligase RNF181 homolog	-0.772292
Cc05_g10190	GSCOC_T00021491001	Bystin	-0.772271
Cc02_g15180	GSCOC_T00013959001	Probable LRR receptor-like serine threonine- kinase At2g24230	-0.772171
Cc02_g04140	GSCOC_T00020317001	21 kDa	-0.771553
Cc06_g02950	GSCOC_T00023564001	Cold-inducible RNA-binding	-0.770566
Cc01_g02930	GSCOC_T00013234001	G-type lectin S-receptor-like serine threonine- kinase SD1-13	-0.769248
Cc01_g10470	GSCOC_T00024143001	-lysine methyltransferase METTL21D	-0.768383
Cc11_g17050	GSCOC_T00038260001	Uncharacterized protein	-0.767846
Cc05_g12680	GSCOC_T00021159001	B3 domain-containing Os07g0679700	-0.767443
Cc02_g27550	GSCOC_T00025086001	DNA damage-repair toleration DRT100	-0.767316
Cc00_g07650	GSCOC_T00006756001	Glycerophosphodiester periplasmic	-0.767285
Cc06_g13870	GSCOC_T00041336001	Uncharacterized protein	-0.766876
Cc01_g18120	GSCOC_T00016243001	Vacuolar sorting-associated 2 homolog 3	-0.76687
Cc02_g17920	GSCOC_T00014323001	Cytochrome c biogenesis chloroplastic	-0.766719
Cc04_g06150	GSCOC_T00022397001	L-threonate dehydrogenase	-0.766215
Cc04_g06680	GSCOC_T00022463001	Probable S-adenosylmethionine-dependent methyltransferase At5g37990	-0.765618
Cc02_g12760	GSCOC_T00029241001	Metal-nicotianamine transporter YSL1	-0.765306
Cc03_g09090	GSCOC_T00042714001	Pentatricopeptide repeat-containing mitochondrial	-0.765075
Cc08_g08290	GSCOC_T00007239001	domain-containing chloroplastic	-0.764941
Cc03_g03900	GSCOC_T00026091001	VERNALIZATION INSENSITIVE 3	-0.764791
Cc10_g03900	GSCOC_T00024932001	Dipeptidyl peptidase family member 6	-0.764743
Cc02_g26930	GSCOC_T00025004001	GTP 3	-0.764695
Cc11_g16310	GSCOC_T00038167001	Probable LRR receptor-like serine threonine- kinase At1g67720	-0.763318
Cc07_g06570	GSCOC_T00039972001	Xyloglucan galactosyltransferase KATAMARI1 homolog	-0.763112
Cc00_g07720	GSCOC_T00009776001	Uncharacterized protein	-0.762734
Cc00_g14260	GSCOC_T00010609001	Pentatricopeptide repeat-containing At2g17670	-0.762604
Cc02_g16800	GSCOC_T00014176001	Probable ribosome-binding factor chloroplastic	-0.762523
Cc05_g05050	GSCOC_T00035057001	Histone-lysine N-methyltransferase ATXR2	-0.762248
Cc00_g22920	GSCOC_T00006704001	Uncharacterized protein	-0.761205
Cc10_g03990	GSCOC_T00034991001	Uroporphyrinogen-III chloroplastic	-0.760216
Cc10_g13740	GSCOC_T00035243001	Histone-lysine N-methyltransferase ASHH2	-0.76008
Cc04_g06330	GSCOC_T00022419001	WUSCHEL-related homeobox 1	-0.759994
Cc04_g04640	GSCOC_T00022196001	Uncharacterized protein	-0.759513
Cc05_g14770	GSCOC_T00038781001	Cytochrome P450 71D10	-0.758345
Cc05_g16130	GSCOC_T00038602001	Uncharacterized protein	-0.757983
Cc08_g05880	GSCOC_T00024382001	Uncharacterized protein At1g28695	-0.757908
Cc07_g07350	GSCOC_T00040084001	Uncharacterized protein	-0.757474
Cc07_g04050	GSCOC_T00039655001	Pentatricopeptide repeat-containing At5g39350	-0.757203
Cc01_g03890	GSCOC_T00040898001	Uncharacterized protein	-0.757152
Cc11_g11690	GSCOC_T00032412001	Nucleolar 14	-0.757144
Cc08_g12770	GSCOC_T00030433001	14 kDa proline-rich	-0.756978
Cc11_g13690	GSCOC_T00032150001	Tetratricopeptide repeat 38	-0.756957
Cc05_g10050	GSCOC_T00021507001	kinase G11A	-0.756771
Cc07_g12690	GSCOC_T00036843001	Probable polyamine oxidase 4	-0.756674
Cc02_g03000	GSCOC_T00020170001	Uncharacterized protein	-0.755407
Cc05_g12590	GSCOC_T00021170001	Uncharacterized protein	-0.754333
Cc04_g02530	GSCOC_T00021926001	Clavaminate synthase At3g21360	-0.754164
Cc09_g06410	GSCOC_T00011304001	Cytochrome P450 71A1	-0.753703
Cc02_g10470	GSCOC_T00029526001	Phosphoglucan phosphatase chloroplastic	-0.753145
Cc07_g11850	GSCOC_T00036948001	Cancer-related nucleoside-triphosphatase homolog	-0.752715
Cc08_g04320	GSCOC_T00034252001	Uncharacterized protein	-0.752205
Cc05_g07950	GSCOC_T00016800001	GTP-binding homolog	-0.751787
Cc11_g00490	GSCOC_T00007401001	Transcription factor MYB1R1	-0.751367
Cc00_g08960	GSCOC_T00010161001	Bifunctional dihydroflavonol 4-reductase flavanone 4-reductase	-0.750415
Cc06_g17650	GSCOC_T00040348001	ABC transporter A family member 1	-0.750093
Cc00_g16020	GSCOC_T00009614001	late blight resistance homolog R1B-17	-0.74909
Cc06_g23060	GSCOC_T00040630001	Uncharacterized protein	-0.747891
Cc02_g16130	GSCOC_T00014088001	Sex determination tasselseed-2	-0.747718
Cc10_g05010	GSCOC_T00034863001	Pollen-specific SF3	-0.747621
Cc02_g13450	GSCOC_T00029151001	Serine threonine tyrosine- kinase HT1	-0.74741
Cc05_g02160	GSCOC_T00018413001	Pyruvate decarboxylase 1	-0.747107
Cc10_g05670	GSCOC_T00034780001	Adenine phosphoribosyltransferase chloroplastic	-0.747083
Cc08_g09410	GSCOC_T00017297001	UPF0481 At3g02645	-0.746798
Cc06_g14930	GSCOC_T00030902001	Probable cyclic nucleotide-gated ion channel 5	-0.746065
Cc05_g11660	GSCOC_T00021286001	Uncharacterized exonuclease domain-containing At3g15140	-0.745864
Cc04_g02480	GSCOC_T00021920001	Uncharacterized protein	-0.745724
Cc03_g08060	GSCOC_T00033195001	Gibberellin 20 oxidase 1	-0.74555
Cc02_g15780	GSCOC_T00014039001	Heat stress transcription factor A-4a	-0.745481
Cc07_g01920	GSCOC_T00039370001	Polyribonucleotide nucleotidyltransferase	-0.744506
Cc09_g07050	GSCOC_T00036324001	UDP-arabinose 4-epimerase 1	-0.74446
Cc11_g08790	GSCOC_T00032825001	1-phosphatidylinositol 3-phosphate 5-kinase FAB1	-0.743895
Cc07_g12680	GSCOC_T00036844001	Probable polyamine oxidase 4	-0.743846
Cc11_g01090	GSCOC_T00019641001	ASPARTIC PROTEASE IN GUARD CELL 2	-0.743677
Cc10_g03950	GSCOC_T00034996001	Uncharacterized protein	-0.743483
Cc06_g16950	GSCOC_T00004152001	G-type lectin S-receptor-like serine threonine- kinase SD3-1	-0.743336
Cc10_g04660	GSCOC_T00034909001	50S ribosomal L4	-0.743124
Cc10_g10230	GSCOC_T00031438001	Probable E3 ubiquitin- ligase ARI2	-0.742778
Cc11_g11810	GSCOC_T00032395001	Folic acid synthesis fol1	-0.742449
Cc07_g06900	GSCOC_T00040019001	LOB domain-containing 38	-0.742011
Cc02_g13550	GSCOC_T00029133001	Transcriptional corepressor LEUNIG	-0.741719
Cc09_g00490	GSCOC_T00017943001	Microtubule-associated 70-5	-0.741531
Cc01_g14770	GSCOC_T00028487001	UDP-glycosyltransferase 87A2	-0.740987
Cc07_g12330	GSCOC_T00036888001	Uncharacterized protein	-0.740126
Cc05_g09120	GSCOC_T00002669001	Glutamyl-tRNA(Gln) amidotransferase subunit chloroplastic mitochondrial	-0.740017
Cc00_g10460	GSCOC_T00005158001	protease Do-like 14	-0.739005
Cc10_g04860	GSCOC_T00034884001	Mannose-P-dolichol utilization defect 1 homolog 2	-0.738949
Cc06_g11340	GSCOC_T00041670001	Glutamate-rich WD repeat-containing 1	-0.738709
Cc04_g02760	GSCOC_T00021957001	Dehydration-responsive element-binding 3	-0.73831
Cc01_g01490	GSCOC_T00037900001	UDP-glycosyltransferase 74E2	-0.738044
Cc02_g18010	GSCOC_T00014334001	Uncharacterized protein	-0.73799
Cc02_g03400	GSCOC_T00020224001	Serine arginine-rich splicing factor RS40	-0.736714
Cc10_g06470	GSCOC_T00034651001	Uncharacterized protein	-0.736484
Cc01_g11530	GSCOC_T00028055001	Exonuclease V	-0.734651
Cc11_g15890	GSCOC_T00038115001	GDSL esterase lipase At5g14450	-0.733491
Cc08_g04040	GSCOC_T00034207001	Calcium permeable stress-gated cation channel 1	-0.733462
Cc01_g18050	GSCOC_T00016250001	Long-chain-alcohol oxidase FAO2	-0.733406
Cc07_g11880	GSCOC_T00036945001	Uncharacterized protein	-0.733046
Cc02_g32490	GSCOC_T00001239001	disease resistance RGA3	-0.732355
Cc00_g17890	GSCOC_T00012819001	60S ribosomal L32-1	-0.732342
Cc04_g01680	GSCOC_T00021826001	Eukaryotic initiation factor 4A-11	-0.732053
Cc06_g17590	GSCOC_T00040340001	Villin-2	-0.731628
Cc02_g37630	GSCOC_T00027963001	Bifunctional	-0.731535
Cc10_g11790	GSCOC_T00031855001	60S ribosomal L9	-0.73153
Cc06_g02420	GSCOC_T00023498001	Aspartic ase nepenthesin-1	-0.731283
Cc07_g01890	GSCOC_T00039367001	Probable ATP-dependent DNA helicase HFM1	-0.730854
Cc03_g01760	GSCOC_T00025801001	Uncharacterized protein	-0.730387
Cc02_g12030	GSCOC_T00029339001	G-type lectin S-receptor-like serine threonine- kinase At4g27290	-0.730333
Cc02_g31850	GSCOC_T00027482001	Trihelix transcription factor GTL2	-0.730038
Cc02_g09700	GSCOC_T00029620001	Germin subfamily 3 member 2	-0.729957
Cc06_g11070	GSCOC_T00041700001	Probable arginine N-methyltransferase 1	-0.729713
Cc08_g10970	GSCOC_T00027086001	Uncharacterized protein	-0.729209
Cc07_g10950	GSCOC_T00037055001	Lysosomal alpha-mannosidase	-0.727988
Cc01_g12530	GSCOC_T00028191001	40S ribosomal S15a	-0.726575
Cc02_g16290	GSCOC_T00014111001	Amino acid permease 2	-0.726375
Cc01_g20240	GSCOC_T00015957001	Protease Do-like chloroplastic	-0.725709
Cc00_g13020	GSCOC_T00002080001	Uncharacterized protein	-0.725636
Cc04_g02150	GSCOC_T00021883001	Dof zinc finger	-0.724504
Cc02_g32420	GSCOC_T00001250001	Histidine-containing phosphotransfer 1	-0.724072
Cc06_g04580	GSCOC_T00042970001	WD repeat-containing 3	-0.723979
Cc09_g02320	GSCOC_T00017692001	Elongator complex 6	-0.723433
Cc00_g23290	GSCOC_T00006925001	Transcription factor bHLH157	-0.72234
Cc07_g05500	GSCOC_T00039823001	Protease 2	-0.722225
Cc02_g17980	GSCOC_T00014330001	EEF1A lysine methyltransferase 4	-0.722097
Cc01_g05340	GSCOC_T00011435001	Enoyl-acyl-carrier- reductas	-0.721804
Cc01_g14300	GSCOC_T00028427001	Chaperone	-0.72151
Cc02_g13510	GSCOC_T00029142001	Uncharacterized protein	-0.720615
Cc02_g25100	GSCOC_T00028794001	Uncharacterized protein	-0.720337
Cc09_g01480	GSCOC_T00017802001	Peroxisomal membrane PMP22	-0.720225
Cc02_g08910	GSCOC_T00029730001	Uncharacterized protein	-0.720193
Cc07_g17350	GSCOC_T00037442001	Trihelix transcription factor GT-2	-0.720054
Cc09_g02950	GSCOC_T00017609001	Auxin-induced 5NG4	-0.719731
Cc01_g12160	GSCOC_T00028141001	Exocyst complex component 7	-0.719561
Cc06_g11090	GSCOC_T00041698001	Uncharacterized protein	-0.718883
Cc08_g13390	GSCOC_T00030350001	Uncharacterized protein	-0.718564
Cc00_g01240	GSCOC_T00007171001	Uncharacterized mitochondrial carrier YMR166C	-0.718358
Cc11_g15700	GSCOC_T00038088001	Uncharacterized protein	-0.718259
Cc08_g05140	GSCOC_T00042443001	Uncharacterized protein	-0.718153
Cc09_g05400	GSCOC_T00007122001	Multiple RNA-binding domain-containing 1	-0.718132
Cc02_g17640	GSCOC_T00014284001	Uncharacterized protein	-0.717323
Cc06_g12180	GSCOC_T00041568001	Tubulin--tyrosine ligase 12	-0.717157
Cc06_g20290	GSCOC_T00022951001	70 kDa peptidyl-prolyl isomerase	-0.716664
Cc02_g27670	GSCOC_T00025101001	Cathepsin B	-0.716609
Cc11_g11390	GSCOC_T00032450001	U-box domain-containing 42	-0.716276
Cc03_g01340	GSCOC_T00025744001	Pumilio homolog 24	-0.716218
Cc05_g05790	GSCOC_T00035160001	UDP-glucose flavonoid 3-O-glucosyltransferase 6	-0.715786
Cc07_g04320	GSCOC_T00039686001	Uncharacterized protein	-0.715569
Cc08_g13180	GSCOC_T00030372001	UDP-glucuronate 4-epimerase 3	-0.71542
Cc00_g27590	GSCOC_T00007291001	Kirola	-0.715086
Cc02_g07200	GSCOC_T00029975001	GUCD1	-0.714983
Cc04_g06520	GSCOC_T00022441001	Pentatricopeptide repeat-containing At4g02750	-0.714398
Cc07_g15480	GSCOC_T00036471001	G-type lectin S-receptor-like serine threonine- kinase RLK1	-0.714392
Cc09_g07700	GSCOC_T00036215001	Probable 18S rRNA (guanine-N(7))-methyltransferase	-0.71423
Cc02_g07030	GSCOC_T00039259001	60S ribosomal L35a-3	-0.714147
Cc02_g16600	GSCOC_T00014153001	Snakin-2	-0.714024
Cc11_g08510	GSCOC_T00032863001	10 kDa mitochondrial	-0.713841
Cc06_g15960	GSCOC_T00030752001	Omega-6 fatty acid endoplasmic reticulum isozyme 2	-0.713364
Cc02_g07540	GSCOC_T00029923001	Pumilio homolog 1	-0.713214
Cc06_g05770	GSCOC_T00043143001	pentatricopeptide repeat-containing At3g08820	-0.711803
Cc11_g13260	GSCOC_T00032205001	Probable peptidyl-prolyl cis-trans isomerase	-0.710985
Cc07_g06370	GSCOC_T00039938001	UPF0481 At3g47200	-0.710922
Cc04_g14840	GSCOC_T00040766001	60S ribosomal L7-4	-0.71059
Cc02_g27030	GSCOC_T00025019001	Probable nucleoredoxin 1	-0.71042
Cc11_g04890	GSCOC_T00042931001	late blight resistance homolog R1A-6	-0.710262
Cc05_g15540	GSCOC_T00038678001	Probable amino acid permease 7	-0.710103
Cc08_g15100	GSCOC_T00035435001	Pentatricopeptide repeat-containing chloroplastic	-0.709789
Cc07_g11550	GSCOC_T00036989001	Endochitinase	-0.70941
Cc03_g03890	GSCOC_T00026090001	Uncharacterized protein	-0.708627
Cc09_g08130	GSCOC_T00020749001	UDP-glycosyltransferase 76C4	-0.708471
Cc04_g03730	GSCOC_T00022071001	Pleiotropic drug resistance 1	-0.708459
Cc09_g01510	GSCOC_T00017799001	U3 small nucleolar RNA-associated 6 homolog	-0.707612
Cc02_g22160	GSCOC_T00014881001	60S ribosomal L3	-0.707311
Cc01_g13260	GSCOC_T00028291001	Pentatricopeptide repeat-containing At5g59600	-0.707298
Cc03_g03760	GSCOC_T00026076001	Photosystem II repair PSB27- chloroplastic	-0.706767
Cc03_g11710	GSCOC_T00043190001	Uncharacterized protein	-0.706729
Cc04_g11270	GSCOC_T00037297001	Cytochrome P450 71A8	-0.706251
Cc00_g33680	GSCOC_T00002237001	Uncharacterized protein	-0.706058
Cc09_g01300	GSCOC_T00017830001	Proline-rich receptor kinase PERK1	-0.705781
Cc03_g06310	GSCOC_T00026421001	eEF1A lysine and N-terminal methyltransferase	-0.705191
Cc05_g08860	GSCOC_T00016921001	Secologanin synthase	-0.704917
Cc04_g04800	GSCOC_T00022218001	F-box LRR-repeat 14	-0.704371
Cc02_g36610	GSCOC_T00003901001	Uncharacterized protein	-0.704339
Cc04_g04780	GSCOC_T00022214001	Pentatricopeptide repeat-containing mitochondrial	-0.703624
Cc00_g28270	GSCOC_T00010422001	UDP-glycosyltransferase 75C1	-0.70351
Cc03_g01600	GSCOC_T00025776001	60S ribosomal L18-2	-0.703098
Cc02_g28350	GSCOC_T00025211001	Cycloartenol-C-24-methyltransferase 1	-0.701843
Cc01_g06880	GSCOC_T00030092001	DNA-directed RNA polymerases IV and V subunit 2	-0.701495
Cc02_g21880	GSCOC_T00014838001	Uncharacterized protein	-0.700105
Cc06_g11080	GSCOC_T00041699001	Uncharacterized protein	-0.699933
Cc00_g08910	GSCOC_T00013250001	S-type anion channel SLAH3	-0.69987
Cc01_g09770	GSCOC_T00024043001	Nucleobase-ascorbate transporter 12	-0.699686
Cc06_g11680	GSCOC_T00041629001	Lycopene epsilon chloroplastic	-0.699664
Cc10_g08740	GSCOC_T00034347001	Tubulin-specific chaperone E	-0.699619
Cc02_g12650	GSCOC_T00029255001	PAP-specific phosphatase HAL2-like	-0.699573
Cc08_g10110	GSCOC_T00026970001	EARLY FLOWERING 3	-0.699564
Cc10_g06870	GSCOC_T00034602001	Uncharacterized protein	-0.699157
Cc05_g02110	GSCOC_T00018402001	Ribosomal RNA small subunit methyltransferase NEP1	-0.698687
Cc04_g05010	GSCOC_T00022241001	Probable CCR4-associated factor 1 homolog 7	-0.697811
Cc01_g10910	GSCOC_T00024207001	Receptor-like serine threonine- kinase NCRK	-0.697516
Cc06_g13250	GSCOC_T00041423001	3-oxoacyl	-0.697428
Cc02_g27390	GSCOC_T00025069001	30S ribosomal chloroplastic	-0.696949
Cc10_g07930	GSCOC_T00034461001	Uncharacterized protein	-0.696603
Cc01_g17940	GSCOC_T00016262001	MDIS1-interacting receptor like kinase 2	-0.696428
Cc05_g02720	GSCOC_T00020893001	Zinc finger CCCH domain-containing 3	-0.695824
Cc06_g08060	GSCOC_T00031179001	Telomere-associated RIF1	-0.695679
Cc10_g10310	GSCOC_T00031429001	Myb-related 330	-0.695589
Cc03_g15600	GSCOC_T00026850001	NADP-dependent alkenal double bond reductase P2	-0.695361
Cc00_g26260	GSCOC_T00007872001	disease resistance RGA4	-0.695204
Cc06_g05300	GSCOC_T00043074001	PAN domain-containing At5g03700	-0.69513
Cc02_g31930	GSCOC_T00027470001	UDP-glycosyltransferase 83A1	-0.694686
Cc05_g08760	GSCOC_T00016908001	Secologanin synthase	-0.694604
Cc11_g15220	GSCOC_T00038029001	AMSH-like ubiquitin thioesterase 2	-0.694548
Cc05_g06310	GSCOC_T00042116001	Uncharacterized protein	-0.693799
Cc10_g10010	GSCOC_T00031472001	Wall-associated receptor kinase-like 20	-0.693209
Cc03_g11700	GSCOC_T00043189001	Uncharacterized protein	-0.692857
Cc02_g23450	GSCOC_T00015041001	Uncharacterized protein	-0.692123
Cc02_g22110	GSCOC_T00014872001	Probable helicase MAGATAMA 3	-0.691286
Cc03_g02700	GSCOC_T00025935001	Uncharacterized protein	-0.691106
Cc03_g03210	GSCOC_T00026002001	Stem-specific TSJT1	-0.691076
Cc00_g13960	GSCOC_T00010017001	Pentatricopeptide repeat-containing At2g33680	-0.690836
Cc11_g08760	GSCOC_T00032829001	late blight resistance homolog R1B-12	-0.690817
Cc11_g05120	GSCOC_T00020452001	G-type lectin S-receptor-like serine threonine- kinase At4g27290	-0.690508
Cc08_g03910	GSCOC_T00034188001	DEAD-box ATP-dependent RNA helicase 5	-0.690487
Cc09_g03970	GSCOC_T00017481001	TATA box-binding -associated factor RNA polymerase I subunit B	-0.689503
Cc02_g17520	GSCOC_T00014270001	Glycine-rich RNA-binding GRP1A	-0.689325
Cc07_g16650	GSCOC_T00037536001	Uncharacterized protein	-0.689067
Cc10_g04670	GSCOC_T00034908001	50S ribosomal L4	-0.688891
Cc04_g14870	GSCOC_T00040771001	Uncharacterized protein	-0.68834
Cc11_g07010	GSCOC_T00018118001	Ubiquitin-conjugating enzyme E2 variant 1A	-0.688318
Cc08_g14800	GSCOC_T00035389001	GMP synthas	-0.687521
Cc07_g06330	GSCOC_T00039934001	Uncharacterized protein	-0.687487
Cc00_g18860	GSCOC_T00002535001	Cold-inducible RNA-binding	-0.687232
Cc10_g02150	GSCOC_T00024713001	Microspherule 1	-0.687074
Cc07_g14480	GSCOC_T00036610001	Magnesium-transporting P-type 1	-0.687037
Cc08_g05750	GSCOC_T00024364001	Uncharacterized protein	-0.687036
Cc01_g19830	GSCOC_T00016006001	Elongation factor Tu	-0.686893
Cc00_g10570	GSCOC_T00001818001	Mitochondrial thiamine pyrophosphate carrier	-0.686504
Cc10_g12680	GSCOC_T00031987001	translocase subunit chloroplastic	-0.68614
Cc11_g06570	GSCOC_T00020677001	vip1	-0.686078
Cc06_g08680	GSCOC_T00031099001	sel-1 homolog 1	-0.685869
Cc07_g07860	GSCOC_T00040148001	Heat shock 70 kDa mitochondrial	-0.685361
Cc10_g06680	GSCOC_T00034625001	Queuine tRNA-ribosyltransferase catalytic subunit 1	-0.684244
Cc11_g01140	GSCOC_T00019630001	WD repeat-containing 55 homolog	-0.683926
Cc02_g09030	GSCOC_T00029711001	Peptidyl-prolyl cis-trans isomerase	-0.683553
Cc03_g02330	GSCOC_T00025875001	Double-stranded RNA-binding 2	-0.683429
Cc00_g17470	GSCOC_T00008148001	CTL DDB_G0274487	-0.683101
Cc05_g06860	GSCOC_T00042201001	Probable polyol transporter 4	-0.683075
Cc02_g00740	GSCOC_T00019867001	Nascent polypeptide-associated complex subunit alpha 2	-0.682638
Cc07_g16460	GSCOC_T00037559001	Probable UDP-N-acetylglucosamine--peptide N-acetylglucosaminyltransferase SEC	-0.682022
Cc11_g04820	GSCOC_T00042918001	Uncharacterized protein	-0.681918
Cc05_g11290	GSCOC_T00021335001	Probable leucine-rich repeat receptor-like serine threonine- kinase At3g14840	-0.681785
Cc08_g15670	GSCOC_T00035507001	Probable inactive receptor kinase At5g58300	-0.681553
Cc00_g12450	GSCOC_T00005352001	Gibberellin 20 oxidase 1	-0.68137
Cc02_g31490	GSCOC_T00027548001	Guanine deaminase	-0.681213
Cc04_g05690	GSCOC_T00022334001	Sucrose nonfermenting 4	-0.680678
Cc07_g18060	GSCOC_T00018808001	UDP-glucuronate:xylan alpha-glucuronosyltransferase 1	-0.680152
Cc01_g00730	GSCOC_T00011065001	Protochlorophyllide-dependent translocon component chloroplastic	-0.680121
Cc11_g01690	GSCOC_T00019532001	EG45-like domain containing 1	-0.679702
Cc08_g13080	GSCOC_T00030386001	UPF0678 fatty acid-binding At1g79260	-0.679048
Cc02_g14630	GSCOC_T00013881001	chloroplastic	-0.678952
Cc01_g12780	GSCOC_T00028227001	U-box domain-containing 33	-0.678718
Cc07_g00550	GSCOC_T00019133001	Actin-histidine N-methyltransferase	-0.678583
Cc08_g16680	GSCOC_T00035636001	Uncharacterized protein	-0.678549
Cc06_g03500	GSCOC_T00023634001	Probable LRR receptor-like serine threonine- kinase At1g67720	-0.678392
Cc02_g15530	GSCOC_T00014005001	Anthocyanin regulatory C1	-0.678391
Cc07_g14390	GSCOC_T00036620001	DETOXIFICATION 41	-0.678309
Cc06_g14460	GSCOC_T00041254001	Adiponectin receptor 2	-0.678147
Cc02_g02560	GSCOC_T00020114001	Probable mediator of RNA polymerase II transcription subunit 36b	-0.677736
Cc02_g25430	GSCOC_T00028747001	casein kinase II subunit beta-4	-0.677383
Cc08_g11040	GSCOC_T00027095001	(S)-coclaurine N-methyltransferase	-0.677257
Cc06_g10950	GSCOC_T00041714001	Uncharacterized protein	-0.677201
Cc10_g11180	GSCOC_T00018463001	Uncharacterized protein	-0.676961
Cc07_g06410	GSCOC_T00039944001	Cyclin-D3-2	-0.67597
Cc05_g11050	GSCOC_T00021363001	Multi -bridging factor 1b	-0.675928
Cc02_g06970	GSCOC_T00039253001	Uncharacterized protein At2g39920	-0.675831
Cc06_g16560	GSCOC_T00030671001	Potassium transporter 5	-0.675461
Cc08_g01380	GSCOC_T00038395001	Nuclear transcription factor Y subunit A-3	-0.675363
Cc06_g11890	GSCOC_T00041603001	Uncharacterized protein	-0.675004
Cc02_g05760	GSCOC_T00039093001	Sodium-coupled neutral amino acid transporter 3	-0.674893
Cc07_g14190	GSCOC_T00036646001	GPI ethanolamine phosphate transferase 2	-0.674868
Cc11_g02980	GSCOC_T00025493001	Interactor of constitutive active ROPs 3	-0.674846
Cc03_g07750	GSCOC_T00026639001	60S ribosomal L13a-4	-0.674098
Cc11_g08250	GSCOC_T00032902001	Uncharacterized protein	-0.674083
Cc02_g09560	GSCOC_T00029641001	Uncharacterized protein	-0.673876
Cc00_g04840	GSCOC_T00012822001	Uncharacterized protein ycf37	-0.673828
Cc00_g20700	GSCOC_T00001287001	Uncharacterized protein	-0.672972
Cc11_g01410	GSCOC_T00019569001	Probable phosphatase 2C 57	-0.672915
Cc06_g18590	GSCOC_T00040482001	L-galactono-	-0.672747
Cc02_g15930	GSCOC_T00014061001	Probable LRR receptor-like serine threonine- kinase At1g53430	-0.671991
Cc07_g06160	GSCOC_T00039912001	Histone-lysine N-methyltransferase CLF	-0.671924
Cc11_g00210	GSCOC_T00019446001	BTB POZ domain-containing At3g19850	-0.671909
Cc02_g07640	GSCOC_T00029910001	Ribosomal RNA large subunit methyltransferase E	-0.671785
Cc02_g08980	GSCOC_T00029722001	Phosphoenolpyruvate carboxylase kinase 2	-0.670921
Cc02_g18260	GSCOC_T00014365001	Pentatricopeptide repeat-containing chloroplastic	-0.670872
Cc05_g12700	GSCOC_T00021157001	Unconventional myosin-Va	-0.670805
Cc02_g01440	GSCOC_T00019967001	Uncharacterized protein	-0.670772
Cc07_g13230	GSCOC_T00036769001	ATP-dependent RNA helicase mitochondrial	-0.670682
Cc01_g05670	GSCOC_T00027379001	Cytochrome P450 94A1	-0.670472
Cc02_g18870	GSCOC_T00014444001	nucleic acid deglycase DJ-1	-0.67046
Cc02_g17620	GSCOC_T00014282001	Glucan endo-	-0.67015
Cc03_g14190	GSCOC_T00031813001	Basic endochitinase	-0.669775
Cc04_g05310	GSCOC_T00022280001	Uncharacterized protein	-0.669692
Cc04_g00350	GSCOC_T00021640001	Probable 28S rRNA (cytosine-C(5))-methyltransferase	-0.669355
Cc02_g32700	GSCOC_T00001205001	-lysine N-methyltransferase EEF2KMT	-0.668835
Cc06_g12580	GSCOC_T00041520001	RRP12	-0.668751
Cc09_g08710	GSCOC_T00020848001	Calcium permeable stress-gated cation channel 1	-0.668617
Cc02_g25780	GSCOC_T00028699001	Uncharacterized protein	-0.667173
Cc02_g01760	GSCOC_T00020008001	Cyclic nucleotide-gated ion channel 1	-0.667124
Cc04_g05730	GSCOC_T00022339001	Uncharacterized protein	-0.667105
Cc00_g27080	GSCOC_T00004251001	Uncharacterized protein	-0.666986
Cc02_g31830	GSCOC_T00027484001	Multisubstrate pseudouridine synthase 7	-0.666931
Cc06_g00250	GSCOC_T00023197001	Uncharacterized protein	-0.666603
Cc04_g01670	GSCOC_T00021825001	Telomere repeat-binding factor 4	-0.666216
Cc08_g08170	GSCOC_T00007254001	Uncharacterized protein	-0.665885
Cc07_g15160	GSCOC_T00036511001	Uncharacterized protein	-0.665757
Cc01_g13820	GSCOC_T00028364001	Uncharacterized protein	-0.665657
Cc00_g12070	GSCOC_T00002445001	nuclease HARBI1	-0.665144
Cc05_g14860	GSCOC_T00038768001	Two-pore potassium channel 1	-0.665122
Cc02_g06780	GSCOC_T00039228001	60S acidic ribosomal P0	-0.66497
Cc01_g08910	GSCOC_T00023929001	Uncharacterized protein	-0.6644
Cc04_g06120	GSCOC_T00022393001	Uncharacterized protein	-0.66406
Cc01_g03820	GSCOC_T00040916001	lipoyltransferase mitochondrial	-0.663835
Cc10_g02390	GSCOC_T00024740001	Ribosomal RNA small subunit methyltransferase I	-0.663629
Cc06_g09900	GSCOC_T00041854001	Uncharacterized protein	-0.663593
Cc08_g01720	GSCOC_T00038342001	Transducin beta 3	-0.663536
Cc04_g06250	GSCOC_T00022409001	Translocon at the outer membrane of chloroplasts 64	-0.663404
Cc01_g06860	GSCOC_T00030089001	Probable ubiquitin-like-specific protease 2A	-0.663265
Cc02_g09520	GSCOC_T00029646001	40S ribosomal S17	-0.663252
Cc05_g08440	GSCOC_T00016866001	Phospholipase A1-II 5	-0.663057
Cc03_g11070	GSCOC_T00042059001	Histone-lysine N-methyltransferase SMYD3	-0.662866
Cc06_g19940	GSCOC_T00022881001	10 kDa mitochondrial	-0.662833
Cc02_g27290	GSCOC_T00025056001	Furcatin hydrolase	-0.662645
Cc00_g15650	GSCOC_T00008804001	Serine threonine- kinase fray2	-0.662629
Cc06_g08850	GSCOC_T00031080001	kinase PINOID 2	-0.662551
Cc07_g01960	GSCOC_T00039375001	Uncharacterized protein	-0.662339
Cc10_g05480	GSCOC_T00034801001	F-box FBW2	-0.661347
Cc08_g03420	GSCOC_T00010771001	Uncharacterized protein	-0.661084
Cc05_g13990	GSCOC_T00038874001	Uncharacterized protein	-0.660516
Cc04_g02680	GSCOC_T00021945001	GATA transcription factor 12	-0.660076
Cc06_g21620	GSCOC_T00001545001	Zinc finger chloroplastic	-0.659542
Cc09_g04600	GSCOC_T00017407001	DNA replication licensing factor MCM6	-0.659533
Cc08_g14750	GSCOC_T00035381001	Mitoferrin	-0.659189
Cc07_g11540	GSCOC_T00036990001	Uncharacterized protein	-0.658064
Cc00_g01390	GSCOC_T00010637001	L-type lectin-domain containing receptor kinase	-0.657197
Cc02_g01130	GSCOC_T00019921001	Rhodanese-like domain-containing chloroplastic	-0.656862
Cc04_g15770	GSCOC_T00042356001	NRT1 PTR FAMILY	-0.656526
Cc06_g05200	GSCOC_T00043056001	Histone deacetylase HDT1	-0.656428
Cc02_g28480	GSCOC_T00009428001	U3 small nucleolar RNA-associated 21 homolog	-0.656325
Cc07_g14400	GSCOC_T00036619001	DETOXIFICATION 41	-0.656158
Cc00_g22470	GSCOC_T00009593001	COBRA 4	-0.656066
Cc00_g21930	GSCOC_T00010625001	Miraculin	-0.656003
Cc04_g16820	GSCOC_T00035796001	SET	-0.655316
Cc08_g07500	GSCOC_T00025381001	Uncharacterized protein	-0.655188
Cc05_g04460	GSCOC_T00031672001	late blight resistance homolog R1B-14	-0.654947
Cc02_g23460	GSCOC_T00015042001	Uncharacterized protein	-0.654681
Cc04_g10410	GSCOC_T00042589001	Uncharacterized protein	-0.654364
Cc08_g17050	GSCOC_T00035685001	Uncharacterized protein	-0.653757
Cc10_g07940	GSCOC_T00034459001	Inositol-tetrakisphosphate 1-kinase 2	-0.653665
Cc01_g08500	GSCOC_T00023876001	Aluminum-activated malate transporter 2	-0.653333
Cc02_g05570	GSCOC_T00039069001	Uroporphyrinogen chloroplastic	-0.65281
Cc06_g11880	GSCOC_T00041605001	Omega-amidase NIT2-B	-0.652524
Cc01_g12700	GSCOC_T00028212001	Uncharacterized protein	-0.652498
Cc07_g04770	GSCOC_T00039738001	NSP-INTERACTING KINASE 1	-0.652466
Cc06_g07640	GSCOC_T00031237001	OS-9	-0.652168
Cc05_g14240	GSCOC_T00038845001	EH domain-containing 1	-0.651213
Cc06_g02990	GSCOC_T00023569001	Probable histone	-0.65103
Cc05_g16090	GSCOC_T00038606001	Porphobilinogen chloroplastic	-0.650399
Cc10_g03340	GSCOC_T00024858001	Uncharacterized protein	-0.650319
Cc00_g14590	GSCOC_T00012537001	Rhodanese-like domain-containing chloroplastic	-0.650276
Cc08_g09320	GSCOC_T00017280001	NRT1 PTR FAMILY	-0.650182
Cc00_g07630	GSCOC_T00006753001	Histone	-0.649517
Cc02_g03320	GSCOC_T00020211001	Probable methyltransferase PMT16	-0.649194
Cc02_g06920	GSCOC_T00039246001	Uncharacterized protein	-0.649062
Cc10_g09590	GSCOC_T00031523001	Uncharacterized protein	-0.648551
Cc02_g38440	GSCOC_T00027862001	50S ribosomal chloroplastic	-0.648479
Cc06_g02910	GSCOC_T00023559001	Pentatricopeptide repeat-containing chloroplastic	-0.648296
Cc07_g15650	GSCOC_T00036451001	Aspartic ase 1	-0.648083
Cc10_g03410	GSCOC_T00024865001	Probable galacturonosyltransferase-like 1	-0.647455
Cc06_g08350	GSCOC_T00031142001	CBL-interacting serine threonine- kinase 24	-0.647275
Cc06_g05500	GSCOC_T00043103001	60S acidic ribosomal P2	-0.647171
Cc11_g08570	GSCOC_T00032854001	Uncharacterized protein	-0.647012
Cc00_g30810	GSCOC_T00008813001	Uncharacterized protein	-0.646968
Cc08_g14330	GSCOC_T00030237001	Uncharacterized protein	-0.646664
Cc11_g09590	GSCOC_T00032698001	lipid phosphate phosphatase chloroplastic	-0.646477
Cc02_g11760	GSCOC_T00029374001	Thioredoxin CXXS1	-0.646423
Cc01_g08210	GSCOC_T00015514001	Peroxidase 64	-0.646327
Cc02_g29450	GSCOC_T00018369001	tRNA uridine 5-carboxymethylaminomethyl modification enzyme	-0.645897
Cc07_g05850	GSCOC_T00039868001	Uncharacterized protein	-0.645829
Cc07_g12750	GSCOC_T00036836001	Uncharacterized protein	-0.645812
Cc06_g22600	GSCOC_T00011690001	Metaxin-2	-0.645673
Cc07_g10930	GSCOC_T00037057001	MLO 4	-0.645624
Cc08_g10890	GSCOC_T00027071001	Uncharacterized protein	-0.645471
Cc10_g05550	GSCOC_T00034793001	arginine N-methyltransferase 2	-0.64531
Cc02_g23810	GSCOC_T00015084001	NAC domain-containing 94	-0.645101
Cc02_g23470	GSCOC_T00015043001	Pentatricopeptide repeat-containing At1g10270	-0.645074
Cc06_g02010	GSCOC_T00023441001	Uncharacterized protein	-0.644683
Cc10_g01890	GSCOC_T00024681001	Uncharacterized protein	-0.644307
Cc11_g06230	GSCOC_T00020627001	Zinc finger 4	-0.643544
Cc07_g16230	GSCOC_T00037591001	Uncharacterized protein	-0.643409
Cc10_g06460	GSCOC_T00034653001	DEAD-box ATP-dependent RNA helicase 39	-0.643369
Cc02_g26960	GSCOC_T00025007001	Uncharacterized protein	-0.643201
Cc09_g00140	GSCOC_T00017986001	Glucan endo-	-0.64257
Cc08_g00370	GSCOC_T00038532001	Uncharacterized protein	-0.642381
Cc05_g08480	GSCOC_T00016870001	Peroxidase 4	-0.64218
Cc01_g12020	GSCOC_T00028122001	Chitinase 2	-0.641692
Cc04_g06300	GSCOC_T00022416001	Phosphoethanolamine N-methyltransferase 1	-0.641384
Cc07_g03960	GSCOC_T00039646001	40S ribosomal S19-3	-0.640513
Cc04_g08460	GSCOC_T00022705001	Plastid division chloroplastic	-0.640247
Cc09_g04990	GSCOC_T00007069001	60S ribosomal L38	-0.639367
Cc00_g22660	GSCOC_T00013102001	DEAD-box ATP-dependent RNA helicase 29	-0.638621
Cc02_g16640	GSCOC_T00014157001	Probable aquaporin PIP-type pTOM75	-0.638501
Cc05_g07820	GSCOC_T00016786001	Prohibitin-2	-0.638345
Cc02_g13750	GSCOC_T00029101001	Uncharacterized protein	-0.637551
Cc08_g09520	GSCOC_T00026893001	Dehydration-responsive element-binding 3	-0.637178
Cc09_g09850	GSCOC_T00006974001	Uncharacterized protein	-0.636977
Cc11_g09620	GSCOC_T00032695001	Elongator complex 2	-0.6368
Cc05_g15080	GSCOC_T00038736001	Cellulose synthase E6	-0.636793
Cc01_g17990	GSCOC_T00016257001	DAG chloroplastic	-0.636767
Cc05_g05960	GSCOC_T00035184001	Uncharacterized protein	-0.636702
Cc07_g18650	GSCOC_T00018721001	2-oxoisovalerate dehydrogenase subunit mitochondrial (Fragment)	-0.636677
Cc01_g21480	GSCOC_T00004975001	Histone-lysine N-methyltransferase EZ3	-0.635959
Cc07_g08510	GSCOC_T00040228001	lipid phosphate phosphatase chloroplastic	-0.63568
Cc11_g08310	GSCOC_T00032893001	Uncharacterized protein At4g22758	-0.635598
Cc04_g16120	GSCOC_T00042403001	Pentatricopeptide repeat-containing At5g02860	-0.63506
Cc11_g08880	GSCOC_T00032816001	Uncharacterized protein	-0.634433
Cc06_g00900	GSCOC_T00023293001	40S ribosomal S4	-0.63388
Cc05_g04000	GSCOC_T00031575001	WRKY transcription factor 6	-0.633877
Cc02_g11510	GSCOC_T00029403001	MLO 6	-0.633766
Cc11_g08820	GSCOC_T00032822001	Transcription repressor MYB6	-0.633599
Cc05_g13670	GSCOC_T00021032001	NEP1-interacting 1	-0.633404
Cc02_g00290	GSCOC_T00019805001	SMG9	-0.633391
Cc06_g08290	GSCOC_T00031150001	Thylakoid lumenal kDa chloroplastic	-0.632904
Cc10_g08830	GSCOC_T00034333001	GTPase Obg	-0.632637
Cc11_g15280	GSCOC_T00038037001		-0.63123
Cc08_g14210	GSCOC_T00030254001	Bifunctional UDP-glucose 4-epimerase and UDP-xylose 4-epimerase 1	-0.631163
Cc06_g22110	GSCOC_T00017148001	60S acidic ribosomal P3	-0.630496
Cc09_g05320	GSCOC_T00007111001	Zinc transporter 5	-0.630066
Cc10_g01030	GSCOC_T00024566001	Mechanosensitive ion channel 8	-0.629922
Cc07_g16450	GSCOC_T00037560001	RNA cytidine acetyltransferase 1	-0.629738
Cc01_g18280	GSCOC_T00016223001	TOM1 2	-0.629446
Cc09_g09770	GSCOC_T00011981001	60S ribosomal L32-1	-0.629378
Cc11_g16810	GSCOC_T00038228001	Uncharacterized protein	-0.629037
Cc04_g11880	GSCOC_T00037399001	esterase HI_1161	-0.62893
Cc07_g07250	GSCOC_T00040066001	-like 2	-0.62889
Cc05_g04580	GSCOC_T00031697001	Exosome complex exonuclease RRP6	-0.628719
Cc08_g15980	GSCOC_T00035545001	Ethylene-responsive transcription factor ERF061	-0.628511
Cc09_g04660	GSCOC_T00017398001	DNA-3-methyladenine glycosylase 1	-0.628508
Cc01_g16400	GSCOC_T00016447001	40S ribosomal S8	-0.628416
Cc06_g16860	GSCOC_T00004140001	Probable galactinol--sucrose galactosyltransferase 2	-0.628245
Cc11_g10360	GSCOC_T00032588001	30S ribosomal 3- chloroplastic	-0.62768
Cc05_g15380	GSCOC_T00038699001	Uncharacterized protein	-0.627361
Cc05_g00590	GSCOC_T00017099001	E3 ubiquitin- ligase MARCH6	-0.627072
Cc01_g07760	GSCOC_T00015451001	Uncharacterized protein	-0.626899
Cc02_g27840	GSCOC_T00025134001	E3 ubiquitin- ligase BIG BROTHER	-0.626895
Cc03_g03580	GSCOC_T00026050001	Linoleate 9S-lipoxygenase 5	-0.626782
Cc07_g07960	GSCOC_T00040158001	Uncharacterized protein	-0.626738
Cc08_g09100	GSCOC_T00017252001	Eukaryotic translation initiation factor 3 subunit L	-0.626624
Cc11_g15100	GSCOC_T00001016001	Inactive leucine-rich repeat receptor kinase CORYNE	-0.62611
Cc02_g14330	GSCOC_T00013840001	ATP synthase mitochondrial F1 complex assembly factor 1	-0.625666
Cc07_g02330	GSCOC_T00039419001	Peptidyl-prolyl cis-trans chloroplastic	-0.625577
Cc05_g13030	GSCOC_T00021112001	Glycine-rich RNA-binding 2	-0.625433
Cc04_g05660	GSCOC_T00022329001	Calnexin homolog	-0.625417
Cc11_g10770	GSCOC_T00032534001	Piriformospora indica-insensitive 2	-0.624923
Cc02_g07460	GSCOC_T00029937001	Uncharacterized protein	-0.624866
Cc08_g02950	GSCOC_T00037797001	Transcription factor bHLH96	-0.624533
Cc02_g12360	GSCOC_T00029292001	Sugar carrier C	-0.624129
Cc03_g04840	GSCOC_T00026214001	Histone H1	-0.624071
Cc05_g09640	GSCOC_T00021558001	Probable receptor kinase At2g42960	-0.623322
Cc04_g10400	GSCOC_T00042588001	Cucumisin	-0.623181
Cc04_g00730	GSCOC_T00021697001	Alanine aminotransferase mitochondrial	-0.623049
Cc11_g15930	GSCOC_T00038120001	Uncharacterized slr1419	-0.62282
Cc07_g03790	GSCOC_T00039625001	Uncharacterized protein	-0.620643
Cc05_g05550	GSCOC_T00035128001	Disease resistance RPP13 4	-0.620128
Cc02_g33320	GSCOC_T00015359001	Probable linoleate 9S-lipoxygenase 5	-0.619842
Cc08_g09460	GSCOC_T00026886001	Exosome complex exonuclease RRP46 homolog	-0.619749
Cc10_g14500	GSCOC_T00033583001	Uncharacterized protein	-0.619357
Cc11_g07070	GSCOC_T00018111001	mitochondrial	-0.619151
Cc04_g08770	GSCOC_T00022751001	RNA pseudouridine synthase mitochondrial	-0.619146
Cc07_g07410	GSCOC_T00040090001	DEAD-box ATP-dependent RNA helicase 16	-0.61874
Cc02_g34330	GSCOC_T00000673001	Bidirectional sugar transporter SWEET17	-0.618547
Cc01_g07640	GSCOC_T00015431001	Transcription factor bHLH157	-0.6185
Cc11_g14190	GSCOC_T00032093001	IAA-amino acid hydrolase ILR1-like 2	-0.618224
Cc05_g02360	GSCOC_T00013144001	Histidine kinase 2	-0.618186
Cc08_g10620	GSCOC_T00027034001	Zinc transporter chloroplastic	-0.617701
Cc05_g05060	GSCOC_T00035058001	Pentatricopeptide repeat-containing mitochondrial	-0.617333
Cc06_g11110	GSCOC_T00041696001	Pentatricopeptide repeat-containing At2g27610	-0.617162
Cc05_g11100	GSCOC_T00021358001	Peptide-N4-(N-acetyl-beta-glucosaminyl)asparagine amidase A	-0.616725
Cc00_g28460	GSCOC_T00008180001	Uncharacterized protein	-0.615455
Cc08_g02440	GSCOC_T00037718001	NAC domain-containing 78	-0.615027
Cc01_g09300	GSCOC_T00023981001	Uncharacterized protein	-0.614944
Cc11_g05330	GSCOC_T00020479001	Flavonol 7-O-beta-glucosyltransferase UGT74F1	-0.614762
Cc04_g05740	GSCOC_T00022340001	Carbonyl reductas	-0.614682
Cc07_g06390	GSCOC_T00039940001	Small RNA degrading nuclease 3	-0.613961
Cc05_g06790	GSCOC_T00042192001	ELMO domain-containing A	-0.613868
Cc02_g28880	GSCOC_T00018186001	Uncharacterized protein	-0.613788
Cc10_g09610	GSCOC_T00031520001	60S ribosomal L6	-0.613304
Cc10_g02960	GSCOC_T00024811001	Glucose-6-phosphate cytosolic	-0.613187
Cc08_g09000	GSCOC_T00017239001	Pentatricopeptide repeat-containing At4g38150	-0.613173
Cc00_g17910	GSCOC_T00008097001	Gibberellin 2-beta-dioxygenase 8	-0.613049
Cc09_g02300	GSCOC_T00017694001	TBC1 domain family member 8	-0.611444
Cc00_g30340	GSCOC_T00012532001	ROOT HAIR DEFECTIVE 3 homolog 2	-0.61116
Cc08_g13340	GSCOC_T00030355001	Methylsterol monooxygenase 1-1	-0.610085
Cc04_g12410	GSCOC_T00005301001	Inosine-5 -monophosphate dehydrogenase	-0.609946
Cc07_g19700	GSCOC_T00033852001	late blight resistance homolog R1A-6	-0.609641
Cc11_g03150	GSCOC_T00025459001	DNA-directed RNA polymerase I subunit RPA2	-0.609602
Cc06_g02970	GSCOC_T00023566001	Uncharacterized protein	-0.608997
Cc05_g06340	GSCOC_T00042120001	Uncharacterized protein	-0.60895
Cc11_g00150	GSCOC_T00019438001	Nucleolin 2	-0.608876
Cc05_g13250	GSCOC_T00021088001	Pentatricopeptide repeat-containing mitochondrial	-0.608816
Cc01_g14010	GSCOC_T00028386001	Uncharacterized protein	-0.608218
Cc02_g17570	GSCOC_T00014276001	Uncharacterized protein	-0.608108
Cc08_g09700	GSCOC_T00026916001	Uncharacterized protein	-0.608091
Cc02_g37470	GSCOC_T00027985001	NAD-dependent malic enzyme 59 kDa mitochondrial	-0.608032
Cc06_g23830	GSCOC_T00040509001	Probable caffeine synthase 3	-0.607913
Cc09_g07750	GSCOC_T00036202001	Peter Pan	-0.607815
Cc10_g16480	GSCOC_T00013410001	Uncharacterized protein	-0.607765
Cc00_g17060	GSCOC_T00008777001	Probable xyloglucan endotransglucosylase hydrolase 28	-0.607744
Cc01_g01400	GSCOC_T00037912001	F-box LRR-repeat At3g59190	-0.607722
Cc03_g07160	GSCOC_T00026556001	Probable leucine-rich repeat receptor kinase At2g33170	-0.606801
Cc02_g33890	GSCOC_T00008633001	Uncharacterized protein	-0.606664
Cc02_g28330	GSCOC_T00025208001	Uncharacterized protein	-0.606623
Cc11_g02390	GSCOC_T00032974001	Probable inactive purple acid phosphatase 29	-0.606267
Cc01_g08520	GSCOC_T00023878001	Receptor kinase TMK1	-0.605857
Cc11_g07720	GSCOC_T00018013001	Two-component response regulator ARR1	-0.605226
Cc08_g14470	GSCOC_T00030219001	O-glucosyltransferase rumi homolog	-0.605036
Cc06_g05050	GSCOC_T00043034001	3-deoxy-D-manno-octulosonic acid transferase	-0.604827
Cc08_g11970	GSCOC_T00030547001	Palmitoyl- thioesterase 1	-0.604486
Cc07_g15640	GSCOC_T00036452001	Heavy metal-associated isoprenylated plant 26	-0.604367
Cc02_g32870	GSCOC_T00016712001	Uncharacterized protein	-0.603569
Cc07_g14140	GSCOC_T00036652001	Cysteine-rich receptor kinase 42	-0.603379
Cc05_g10250	GSCOC_T00021480001	Polyphenol chloroplastic	-0.60287
Cc08_g05240	GSCOC_T00042427001	chloroplastic	-0.602845
Cc02_g31840	GSCOC_T00027483001	Pseudouridylate synthase 7 homolog	-0.602622
Cc11_g15050	GSCOC_T00001024001	Histone-lysine N- H3 lysine-9 specific SUVH4	-0.60227
Cc06_g01920	GSCOC_T00023430001	Serine threonine- kinase BSK8	-0.601493
Cc08_g10820	GSCOC_T00027061001	Thromboxane-A synthase	-0.601229
Cc07_g21460	GSCOC_T00001444001	late blight resistance homolog R1A-6	-0.600733
Cc02_g12700	GSCOC_T00029249001	Uncharacterized protein	-0.60015
Cc07_g00580	GSCOC_T00019136001	50S ribosomal L13	-0.599877
Cc04_g17000	GSCOC_T00035822001	40S ribosomal S14-3	-0.59959
Cc09_g02600	GSCOC_T00017654001	Uncharacterized protein	-0.599554
Cc00_g11790	GSCOC_T00007740001	Disease resistance RPP13 4	-0.599215
Cc01_g04940	GSCOC_T00028571001	ABC transporter G family member 15	-0.599167
Cc02_g08870	GSCOC_T00029739001	Probable lysine-specific demethylase JMJ14	-0.598749
Cc00_g13000	GSCOC_T00002078001	Uncharacterized protein	-0.597711
Cc02_g37160	GSCOC_T00028031001	Ribulose-	-0.597542
Cc02_g30570	GSCOC_T00023788001	calcium-transporting ATPase plasma membrane-type	-0.5975
Cc09_g03130	GSCOC_T00017586001	GDSL esterase lipase At5g33370	-0.59723
Cc05_g12850	GSCOC_T00021135001	Calcium-binding PBP1	-0.59639
Cc06_g06500	GSCOC_T00031374001	Uncharacterized protein	-0.59549
Cc02_g32110	GSCOC_T00018928001	Phospholipid-transporting ATPase 1	-0.595462
Cc02_g20920	GSCOC_T00014716001	Magnesium-dependent phosphatase 1	-0.5952
Cc09_g00240	GSCOC_T00017973001	Transcription termination factor mitochondrial	-0.594289
Cc11_g14030	GSCOC_T00032112001	Uncharacterized protein	-0.593719
Cc06_g05190	GSCOC_T00043055001	Histone deacetylase HDT1	-0.593719
Cc01_g10330	GSCOC_T00024121001	Uncharacterized protein	-0.593454
Cc06_g07660	GSCOC_T00031235001	F-box LRR-repeat 14	-0.593357
Cc06_g02730	GSCOC_T00023534001	E3 ubiquitin- ligase XBAT31	-0.593276
Cc02_g05790	GSCOC_T00039098001	Wound-induced 1	-0.593217
Cc06_g09770	GSCOC_T00041871001	tRNA(Ile)-lysidine synthase	-0.593137
Cc06_g21490	GSCOC_T00008017001	Cation calcium exchanger 1	-0.593056
Cc07_g07670	GSCOC_T00040122001	Probable hexokinase-like 2	-0.592967
Cc08_g13310	GSCOC_T00030358001	Uncharacterized protein	-0.592719
Cc02_g33430	GSCOC_T00015373001	Chaperone	-0.592525
Cc03_g14030	GSCOC_T00031784001	Uncharacterized protein	-0.592333
Cc02_g10440	GSCOC_T00029529001	Probable U3 small nucleolar RNA-associated 7	-0.592217
Cc02_g25310	GSCOC_T00028764001	40S ribosomal S7	-0.592128
Cc02_g20540	GSCOC_T00014668001	Uncharacterized protein	-0.592101
Cc09_g04880	GSCOC_T00007056001	Vacuolar-sorting receptor 6	-0.5921
Cc00_g16970	GSCOC_T00012129001	Uncharacterized protein	-0.591734
Cc02_g33280	GSCOC_T00015354001	Cullin-1	-0.591591
Cc02_g33660	GSCOC_T00015406001	Subtilisin-like protease	-0.591589
Cc11_g04020	GSCOC_T00034025001	late blight resistance homolog R1A-6	-0.591588
Cc04_g09370	GSCOC_T00022824001	40S ribosomal S3a	-0.591278
Cc01_g17620	GSCOC_T00016300001	Receptor-like serine threonine- kinase ALE2	-0.591159
Cc08_g07730	GSCOC_T00011861001	Uncharacterized protein	-0.591057
Cc01_g07300	GSCOC_T00030162001	Translation initiation factor eIF-2B subunit gamma	-0.590988
Cc11_g17210	GSCOC_T00038281001	Uncharacterized protein	-0.590894
Cc00_g20310	GSCOC_T00010044001	Calcium-dependent kinase 8	-0.590711
Cc06_g07760	GSCOC_T00031219001	Arogenate dehydrogenase chloroplastic	-0.589704
Cc07_g09360	GSCOC_T00037254001	Uncharacterized protein	-0.58923
Cc02_g01570	GSCOC_T00019983001	Pentatricopeptide repeat-containing mitochondrial	-0.588907
Cc04_g06110	GSCOC_T00022392001	Uncharacterized protein	-0.588707
Cc05_g15410	GSCOC_T00038696001	Kinesin KIN-14G	-0.588537
Cc00_g03880	GSCOC_T00007594001	Mitochondrial intermembrane space import and assembly 40	-0.588464
Cc02_g04680	GSCOC_T00020387001	Uncharacterized protein At3g06530	-0.588041
Cc08_g08310	GSCOC_T00007236001	Pentatricopeptide repeat-containing chloroplastic	-0.587686
Cc02_g39330	GSCOC_T00027730001	Clustered mitochondria homolog	-0.587653
Cc11_g00600	GSCOC_T00004220001	Dihydroorotate dehydrogenase (quinone) mitochondrial	-0.587527
Cc10_g07390	GSCOC_T00034529001	Uncharacterized protein	-0.587506
Cc02_g35150	GSCOC_T00042893001	Uncharacterized protein	-0.586913
Cc07_g07060	GSCOC_T00040040001	BTB POZ domain-containing At3g49900	-0.586748
Cc04_g02800	GSCOC_T00021961001	Zinc phosphodiesterase ELAC 2	-0.586263
Cc08_g03050	GSCOC_T00037814001	Pentatricopeptide repeat-containing At5g15300	-0.58622
Cc03_g01970	GSCOC_T00025830001	40S ribosomal S21-2	-0.58613
Cc04_g09830	GSCOC_T00042513001	Mitochondrial import inner membrane translocase subunit TIM8	-0.585908
Cc06_g17620	GSCOC_T00040344001	Ribosomal RNA-processing 12	-0.585801
Cc00_g20470	GSCOC_T00011605001	Mitochondrial import inner membrane translocase subunit Tim21	-0.585528
Cc03_g04170	GSCOC_T00026126001	Hsp70-Hsp90 organizing 1	-0.585035
Cc11_g00730	GSCOC_T00019765001	40S ribosomal S28	-0.584658
Cc03_g10530	GSCOC_T00031072001	UDP-glycosyltransferase 92A1	-0.58356
Cc02_g01500	GSCOC_T00019974001	IQ-DOMAIN 14	-0.583527
Cc08_g11460	GSCOC_T00027147001	Bax inhibitor 1	-0.582172
Cc10_g04470	GSCOC_T00034930001	Probable inactive heme oxygenase chloroplastic	-0.581916
Cc02_g34190	GSCOC_T00000655001	Translationally-controlled tumor homolog	-0.581847
Cc11_g04790	GSCOC_T00042911001	Auxin-induced 15A	-0.58113
Cc10_g14690	GSCOC_T00033614001	Pentatricopeptide repeat-containing At3g61360	-0.581054
Cc06_g17180	GSCOC_T00036348001	Uncharacterized protein	-0.580834
Cc10_g03430	GSCOC_T00024868001	pentatricopeptide repeat-containing At1g19290	-0.580754
Cc02_g25250	GSCOC_T00028774001	Pentatricopeptide repeat-containing At1g02150	-0.580565
[truncated: 1,859 more rows]
