# Supplementary material for: Transcriptomic Leaf Profiling Reveals Differential Responses of the Two Most Traded Coffee Species to Elevated [CO2]
Source: Int J Mol Sci. 2020 Dec 3;21(23):9211. doi: 10.3390/ijms21239211 (PMC7730880; doi:10.3390/ijms21239211)
Supplement: Supplementary file 1 [file ijms-21-09211-s001.zip › Table S4.xlsx]

## Sheet: up-regulated
Gene ID	ORF Name	Protein Name	Fold Change
Cc05_g05400	GSCOC_T00035108001	Isoprene chloroplastic	9.88898
Cc05_g04940	GSCOC_T00035039001	Isocitrate lyase	8.60052
Cc01_g05170	GSCOC_T00011473001	Uncharacterized protein	8.46591
Cc05_g00220	GSCOC_T00017048001	Uncharacterized protein	8.26055
Cc02_g25790	GSCOC_T00028697001	Very-long-chain aldehyde decarbonylase CER3	8.00638
Cc02_g20300	GSCOC_T00014641001	Uncharacterized protein	7.83886
Cc02_g03420	GSCOC_T00020226001	Ethylene-responsive transcription factor ERF025	7.7925
Cc03_g12230	GSCOC_T00015260001	Desiccation-related PCC13-62	7.59409
Cc03_g15270	GSCOC_T00026800001	EG45-like domain containing 1	7.56819
Cc03_g12250	GSCOC_T00015253001	Desiccation-related PCC13-62	7.55773
Cc01_g08230	GSCOC_T00015518001	Glucomannan 4-beta-mannosyltransferase 9	6.96432
Cc01_g09500	GSCOC_T00024004001	Cytochrome P450 94A1	6.89618
Cc09_g03820	GSCOC_T00017499001	12-oxophytodienoate reductase 1	6.88977
Cc02_g08150	GSCOC_T00029839001	Uncharacterized protein	6.54559
Cc00_g12860	GSCOC_T00008937001	Uncharacterized protein	6.40602
Cc10_g12850	GSCOC_T00035377001	Stearoyl	6.13463
Cc00_g11660	GSCOC_T00004163001	Uncharacterized protein	6.1278
Cc05_g13060	GSCOC_T00021109001	(-)-germacrene D synthase	6.11195
Cc07_g14440	GSCOC_T00036614001	Uncharacterized protein	6.08947
Cc09_g08450	GSCOC_T00020806001	Tyrosine DOPA decarboxylase 1	5.99868
Cc02_g29220	GSCOC_T00004501001	Cytochrome P450 750A1	5.97521
Cc06_g13950	GSCOC_T00041325001	EG45-like domain containing 1	5.91097
Cc11_g08190	GSCOC_T00032909001	Pectinesterase 2	5.88745
Cc00_g13600	GSCOC_T00011110001	(E,E)-alpha-farnesene synthase	5.86198
Cc06_g09490	GSCOC_T00041906001	Probable sulfate transporter	5.66974
Cc02_g02970	GSCOC_T00020167001	Heavy metal-associated isoprenylated plant 26	5.63115
Cc03_g15290	GSCOC_T00026803001	Reticuline oxidase	5.61071
Cc00_g17250	GSCOC_T00006075001	Premnaspirodiene oxygenase	5.48451
Cc00_g05510	GSCOC_T00006857001	ABC transporter B family member 9	5.47917
Cc00_g17280	GSCOC_T00006079001	Ent-copalyl diphosphate chloroplastic	5.47034
Cc01_g05440	GSCOC_T00027334001	Esterase PIR7B	5.46197
Cc08_g04700	GSCOC_T00042506001	Cyanidin-3-O-glucoside 2-O-glucuronosyltransferase	5.36165
Cc11_g14430	GSCOC_T00032060001	Cyanidin-3-O-glucoside 2-O-glucuronosyltransferase	5.34338
Cc10_g06850	GSCOC_T00034604001	Uncharacterized protein	5.33031
Cc04_g10600	GSCOC_T00042618001	Cytochrome P450 82A3	5.32621
Cc11_g08430	GSCOC_T00032876001	Uncharacterized protein	5.2211
Cc04_g10590	GSCOC_T00042615001	Cytochrome P450 82A1 (Fragment)	5.21174
Cc07_g08030	GSCOC_T00040165001	Transcription factor MYB113	5.2032
Cc08_g07450	GSCOC_T00025373001	Premnaspirodiene oxygenase	5.19265
Cc03_g04970	GSCOC_T00026229001	Inhibitor of trypsin and hageman factor	5.1806
Cc00_g03750	GSCOC_T00013262001	ABC transporter B family member 9	5.17433
Cc11_g06140	GSCOC_T00020608001	Flavanone 7-O-glucoside 2 -O-beta-L-rhamnosyltransferase	5.12542
Cc10_g08330	GSCOC_T00034401001	Rhamnogalacturonate lyase	5.07778
Cc08_g14250	GSCOC_T00030247001	Thaumatin	5.04267
Cc02_g10040	GSCOC_T00029574001	Cyanidin-3-O-glucoside 2-O-glucuronosyltransferase	5.04024
Cc06_g10670	GSCOC_T00041749001	Profilin-2	5.01369
Cc03_g10990	GSCOC_T00042047001	Cytochrome P450 71A2	4.96973
Cc11_g06650	GSCOC_T00020689001	L-gulonolactone oxidase	4.94524
Cc05_g09500	GSCOC_T00021575001	Glycerol-3-phosphate 2-O-acyltransferase 6	4.92302
Cc00_g31970	GSCOC_T00012440001	Ent-copalyl diphosphate chloroplastic	4.83876
Cc07_g13930	GSCOC_T00036676001	UDP-rhamnose:rhamnosyltransferase 1	4.83676
Cc05_g03160	GSCOC_T00033510001	Flavanone 7-O-glucoside 2 -O-beta-L-rhamnosyltransferase	4.83666
Cc00_g15220	GSCOC_T00001823001	(+)-menthofuran synthase	4.79739
Cc10_g03760	GSCOC_T00024913001	NRT1 PTR FAMILY	4.79739
Cc08_g12020	GSCOC_T00030539001	Subtilisin-like protease	4.79362
Cc02_g17930	GSCOC_T00014324001	DETOXIFICATION 41	4.78818
Cc02_g10010	GSCOC_T00029577001	Cyanidin-3-O-glucoside 2-O-glucuronosyltransferase	4.76547
Cc06_g06080	GSCOC_T00043179001	Beta- insoluble isoenzyme 1	4.7621
Cc00_g21140	GSCOC_T00000021001	germin 3-2	4.73809
Cc07_g11010	GSCOC_T00037048001	Uncharacterized protein	4.73465
Cc06_g12810	GSCOC_T00041492001	Probable pectinesterase pectinesterase inhibitor 54	4.6943
Cc05_g11910	GSCOC_T00021255001	Uncharacterized protein	4.6904
Cc08_g14230	GSCOC_T00030252001	Thaumatin	4.67023
Cc06_g00660	GSCOC_T00023253001	Wound-induced 1	4.62942
Cc02_g27940	GSCOC_T00025151001	Uncharacterized protein	4.62856
Cc00_g25170	GSCOC_T00012942001	1-aminocyclopropane-1-carboxylate oxidase 4	4.62038
Cc00_g27860	GSCOC_T00012524001	Glucose 1-dehydrogenase B	4.60731
Cc06_g19900	GSCOC_T00022873001	Glucose 1-dehydrogenase B	4.5664
Cc07_g04750	GSCOC_T00039735001	Zinc finger CONSTANS-LIKE 2	4.56335
Cc07_g14420	GSCOC_T00036617001	DETOXIFICATION 41	4.55812
Cc05_g13070	GSCOC_T00021108001	(-)-germacrene D synthase	4.53522
Cc02_g24750	GSCOC_T00028846001	Carotenoid cleavage dioxygenase chloroplastic	4.53039
Cc02_g38600	GSCOC_T00027842001	Probable WRKY transcription factor 56	4.5299
Cc02_g16160	GSCOC_T00014093001	GDSL esterase lipase At1g29670	4.51243
Cc10_g02520	GSCOC_T00024756001	Sec14 cytosolic factor	4.49759
Cc07_g09890	GSCOC_T00037186001	Uncharacterized protein	4.48431
Cc01_g03940	GSCOC_T00040884001	G-type lectin S-receptor-like serine threonine- kinase RLK1	4.47088
Cc00_g28430	GSCOC_T00003032001	Inorganic phosphate transporter 1-4	4.46304
Cc11_g10690	GSCOC_T00032545001	Uncharacterized protein	4.44196
Cc02_g38880	GSCOC_T00027797001	GDSL esterase lipase At4g01130	4.43421
Cc03_g05860	GSCOC_T00026358001	Uncharacterized protein	4.42764
Cc10_g04010	GSCOC_T00034989001	Uncharacterized protein	4.41223
Cc02_g10030	GSCOC_T00029575001	Cyanidin-3-O-glucoside 2-O-glucuronosyltransferase	4.40671
Cc06_g10570	GSCOC_T00041761001	Probable pectinesterase 53	4.37895
Cc02_g17410	GSCOC_T00014253001	Laccase-11	4.37557
Cc02_g03430	GSCOC_T00020227001	Dehydration-responsive element-binding 1B	4.371
Cc10_g00850	GSCOC_T00024545001	Lysine histidine transporter-like 7	4.36639
Cc00_g17240	GSCOC_T00006074001	Premnaspirodiene oxygenase	4.35537
Cc00_g06500	GSCOC_T00005824001	Probable xyloglucan endotransglucosylase hydrolase 23	4.34774
Cc01_g11350	GSCOC_T00024263001	NAC domain-containing 68	4.34684
Cc00_g15520	GSCOC_T00000738001	Beta- insoluble isoenzyme 1	4.32345
Cc02_g30560	GSCOC_T00023784001	Perakine reductase	4.32025
Cc11_g11030	GSCOC_T00032492001	Uncharacterized RING finger	4.30785
Cc03_g04180	GSCOC_T00026127001	Sulfate transporter	4.30772
Cc02_g06190	GSCOC_T00039144001	U-box domain-containing 17	4.30267
Cc08_g10290	GSCOC_T00026993001	Probable LRR receptor-like serine threonine- kinase At3g47570	4.30267
Cc01_g19640	GSCOC_T00016033001	Basic 7S globulin	4.29928
Cc06_g18730	GSCOC_T00028895001	Uncharacterized protein	4.28899
Cc02_g14260	GSCOC_T00013833001	GDSL esterase lipase At5g45960	4.28
Cc06_g03900	GSCOC_T00023688001	Aquaporin PIP2-2	4.27875
Cc10_g06840	GSCOC_T00034605001	Uncharacterized protein	4.26628
Cc11_g14380	GSCOC_T00032065001	Auxin-induced 5NG4	4.25251
Cc09_g07380	GSCOC_T00036269001	Reticuline oxidase	4.2167
Cc02_g34740	GSCOC_T00011780001	Uncharacterized protein	4.21444
Cc07_g04930	GSCOC_T00039754001	Uncharacterized protein	4.19986
Cc00_g05500	GSCOC_T00006856001	ABC transporter B family member 9	4.17867
Cc02_g18120	GSCOC_T00014348001	9-divinyl ether synthase	4.1587
Cc02_g27490	GSCOC_T00025079001	G-type lectin S-receptor-like serine threonine- kinase SD2-5	4.157
Cc04_g08040	GSCOC_T00022652001	Tropinone reductase homolog At1g07440	4.14726
Cc10_g02120	GSCOC_T00024709001	Uncharacterized protein	4.10979
Cc07_g21440	GSCOC_T00016974001	Probable xyloglucan endotransglucosylase hydrolase 23	4.08104
Cc06_g22450	GSCOC_T00005214001	Cytochrome P450 83B1	4.0578
Cc01_g13190	GSCOC_T00028282001	Laccase-2	4.04821
Cc08_g13960	GSCOC_T00030281001	Dehydration-responsive element-binding 1A	4.04204
Cc08_g06040	GSCOC_T00024418001	Long-chain-alcohol oxidase FAO4A	4.0366
Cc02_g15810	GSCOC_T00014044001	Uncharacterized protein C2F7.02c	4.02691
Cc08_g13970	GSCOC_T00030280001	Ethylene-responsive transcription factor ERF025	4.02011
Cc00_g21210	GSCOC_T00009603001	Myb-related 305	4.01991
Cc05_g03130	GSCOC_T00033505001	Endoglucanase 11	4.00469
Cc05_g07470	GSCOC_T00042276001	AD	3.97957
Cc10_g10180	GSCOC_T00031444001	Uncharacterized protein	3.97538
Cc07_g11580	GSCOC_T00036986001	Probable acyl-activating enzyme peroxisomal	3.96996
Cc11_g16200	GSCOC_T00038155001	Probable pectate lyase 5	3.95998
Cc08_g15540	GSCOC_T00035490001	Disease resistance response 206	3.95149
Cc01_g10860	GSCOC_T00024200001	Bifunctional monodehydroascorbate reductase and carbonic anhydrase nectarin-3	3.93439
Cc11_g14560	GSCOC_T00032042001	Probable xyloglucan endotransglucosylase hydrolase 33	3.92935
Cc08_g07990	GSCOC_T00007319001	Probable 6-phosphogluconolactonase chloroplastic	3.92877
Cc01_g04010	GSCOC_T00040856001	Isoflavone reductase homolog P3	3.91406
Cc02_g05960	GSCOC_T00039117001	Laccase-12	3.90631
Cc06_g13440	GSCOC_T00041397001	Xyloglucan endotransglucosylase hydrolase 22	3.9004
Cc03_g12510	GSCOC_T00015209001	UDP-rhamnose:rhamnosyltransferase 1	3.86953
Cc03_g15200	GSCOC_T00026786001	UDP-glycosyltransferase 74E1	3.86171
Cc01_g08700	GSCOC_T00023904001	Momilactone A synthase	3.83793
Cc03_g15190	GSCOC_T00026785001	UDP-glycosyltransferase 74E1	3.83013
Cc03_g14380	GSCOC_T00026648001	Polygalacturonase At1g48100	3.82817
Cc11_g06510	GSCOC_T00020667001	Uncharacterized protein	3.82649
Cc01_g15110	GSCOC_T00016604001	Peroxidase 4	3.81558
Cc00_g15800	GSCOC_T00000089001	Uncharacterized protein	3.80642
Cc04_g06720	GSCOC_T00022468001	Uncharacterized protein	3.79749
Cc09_g00950	GSCOC_T00017878001	Uncharacterized protein	3.78807
Cc09_g05150	GSCOC_T00007088001	Cytochrome P450 89A2	3.77505
Cc05_g12830	GSCOC_T00021138001	Zinc finger CONSTANS-LIKE 10	3.75686
Cc09_g07390	GSCOC_T00036268001	Reticuline oxidase	3.74387
Cc01_g05920	GSCOC_T00027420001	GAST1	3.73542
Cc11_g06340	GSCOC_T00020644001	Beta-glucosidase 18	3.73454
Cc07_g12820	GSCOC_T00036828001	LHY	3.7319
Cc03_g01690	GSCOC_T00025790001	Phylloplanin	3.71546
Cc01_g15210	GSCOC_T00016591001	Uncharacterized protein	3.71404
Cc01_g04850	GSCOC_T00028549001	Uncharacterized protein	3.68581
Cc10_g07810	GSCOC_T00034477001	Transcription factor RAX3	3.67867
Cc00_g34150	GSCOC_T00012633001	Uncharacterized protein	3.6776
Cc09_g04610	GSCOC_T00017406001	Probable purine permease 4	3.66474
Cc00_g23570	GSCOC_T00005752001	laccase-9	3.65425
Cc00_g30530	GSCOC_T00007195001	Cytochrome P450 71A1	3.64815
Cc08_g16300	GSCOC_T00035586001	Uncharacterized protein At5g39865	3.63981
Cc11_g05110	GSCOC_T00020451001	G-type lectin S-receptor-like serine threonine- kinase At4g27290	3.63698
Cc01_g13870	GSCOC_T00028369001	Laccase-4	3.63574
Cc07_g13710	GSCOC_T00036704001	Geraniol dehydrogenase 1	3.62543
Cc00_g29350	GSCOC_T00010477001	Reticuline oxidase	3.62265
Cc00_g08050	GSCOC_T00001791001	Transcription factor MYB46	3.61393
Cc07_g17690	GSCOC_T00018863001	G-type lectin S-receptor-like serine threonine- kinase RLK1	3.61104
Cc11_g11190	GSCOC_T00032476001	Peroxidase 11	3.61085
Cc01_g11120	GSCOC_T00024230001	Uncharacterized protein	3.60536
Cc05_g05180	GSCOC_T00035074001	Zinc finger CONSTANS-LIKE 4	3.60047
Cc04_g10950	GSCOC_T00008913001	Major allergen Pru ar 1	3.57234
Cc07_g13660	GSCOC_T00036709001	Geraniol dehydrogenase 1	3.56777
Cc08_g07460	GSCOC_T00025374001	Premnaspirodiene oxygenase	3.5652
Cc03_g03700	GSCOC_T00026068001	Phosphatidylinositol transfer 3	3.55695
Cc03_g09220	GSCOC_T00042698001	UDP-glycosyltransferase 75D1	3.55599
Cc00_g17020	GSCOC_T00005618001	Uncharacterized protein	3.55305
Cc07_g16980	GSCOC_T00037489001	Flavonoid 3	3.54877
Cc02_g24210	GSCOC_T00015137001	Pectinesterase 2	3.54608
Cc06_g15420	GSCOC_T00030830001	Chitotriosidase-1	3.5374
Cc08_g03210	GSCOC_T00037838001	Mitogen-activated kinase kinase 4	3.53293
Cc06_g09560	GSCOC_T00041898001	Aldehyde dehydrogenase family 2 member C4	3.53166
Cc10_g06900	GSCOC_T00034597001	Uncharacterized protein	3.52753
Cc11_g08110	GSCOC_T00032920001	PLANT CADMIUM RESISTANCE 2	3.49872
Cc10_g05460	GSCOC_T00034803001	Snakin-1	3.49479
Cc10_g03610	GSCOC_T00024892001	Myosin heavy chain kinase B	3.48579
Cc02_g14560	GSCOC_T00013869001	GDSL esterase lipase At1g28590	3.4842
Cc02_g15160	GSCOC_T00013953001	CBL-interacting kinase 5	3.46661
Cc06_g22070	GSCOC_T00017141001	Cytochrome P450 83B1	3.46584
Cc06_g09500	GSCOC_T00041905001	Uncharacterized protein	3.4633
Cc08_g09640	GSCOC_T00026910001	Uncharacterized protein	3.45412
Cc00_g04980	GSCOC_T00005519001	Uncharacterized protein	3.44718
Cc07_g13370	GSCOC_T00036751001	ODORANT1	3.44195
Cc03_g09010	GSCOC_T00042727001	CYC02	3.44187
Cc03_g07060	GSCOC_T00026542001	Serine incorporator 3	3.44186
Cc07_g14670	GSCOC_T00036582001	Laccase-17	3.43955
Cc01_g19650	GSCOC_T00016031001	Basic 7S globulin 2	3.43793
Cc10_g00910	GSCOC_T00024551001	L-ascorbate oxidase homolog	3.42941
Cc01_g07390	GSCOC_T00030175001	Alcohol dehydrogenase-like 7	3.42664
Cc06_g13430	GSCOC_T00041399001	Probable xyloglucan endotransglucosylase hydrolase 23	3.42649
Cc07_g13420	GSCOC_T00036739001	GDSL esterase lipase At5g37690	3.42465
Cc05_g13710	GSCOC_T00021027001	Uncharacterized protein	3.41791
Cc10_g06020	GSCOC_T00034723001	RING-H2 finger ATL3	3.41418
Cc08_g07530	GSCOC_T00025385001	Ent-copalyl diphosphate chloroplastic	3.40558
Cc01_g21310	GSCOC_T00004994001	Probable beta-D-xylosidase 2	3.39857
Cc09_g01950	GSCOC_T00017742001	Cytochrome P450 77A3	3.39414
Cc05_g07320	GSCOC_T00042259001	Transcription factor bHLH36	3.38422
Cc04_g10250	GSCOC_T00042568001	Vinorine synthase	3.37085
Cc00_g14300	GSCOC_T00010613001	Basic endochitinase	3.36966
Cc02_g27930	GSCOC_T00025150001	Transcription factor MYB46	3.35323
Cc02_g17580	GSCOC_T00014277001	Uncharacterized protein At1g01500	3.35318
Cc05_g03140	GSCOC_T00033506001	NRT1 PTR FAMILY	3.35133
Cc00_g01970	GSCOC_T00000819001	TIFY 5A	3.34819
Cc00_g22140	GSCOC_T00005697001	Uncharacterized protein	3.34105
Cc01_g21320	GSCOC_T00004993001	Probable beta-D-xylosidase 2	3.34011
Cc06_g02440	GSCOC_T00023500001	Laccase-17	3.33813
Cc06_g01990	GSCOC_T00023439001	Copper transporter 1	3.33305
Cc00_g31330	GSCOC_T00004273001	O-acyltransferase WSD1	3.3306
Cc02_g08940	GSCOC_T00029726001	Transcription factor MYB4	3.32362
Cc00_g29880	GSCOC_T00006934001	8-hydroxyquercetin 8-O-methyltransferase	3.32283
Cc00_g12040	GSCOC_T00005331001	Nitrate reductas	3.31848
Cc00_g06370	GSCOC_T00004112001	Premnaspirodiene oxygenase	3.31421
Cc10_g09130	GSCOC_T00034292001	Hydroxysteroid 11-beta-dehydrogenase 1	3.31129
Cc07_g06020	GSCOC_T00039894001	Uncharacterized protein At3g61260	3.30857
Cc02_g16190	GSCOC_T00014097001	GDSL esterase lipase At1g29670	3.30309
Cc06_g04760	GSCOC_T00042998001	RING-H2 finger ATL52	3.29896
Cc06_g02310	GSCOC_T00023485001	Uncharacterized protein	3.29704
Cc05_g05740	GSCOC_T00035151001	Transcription factor MYB4	3.28968
Cc01_g03950	GSCOC_T00040882001	G-type lectin S-receptor-like serine threonine- kinase RLK1	3.27119
Cc04_g00700	GSCOC_T00021693001	Pectinesterase 3	3.26891
Cc04_g04400	GSCOC_T00022164001	Uncharacterized protein	3.2574
Cc11_g12230	GSCOC_T00032344001	SNAP25 homologous SNAP30	3.25543
Cc09_g07110	GSCOC_T00036313001	Dammarenediol II synthase	3.25511
Cc05_g04270	GSCOC_T00031641001	Uncharacterized protein	3.2551
Cc02_g29230	GSCOC_T00004503001	Flavonoid 3	3.24213
Cc10_g07170	GSCOC_T00034557001	Transcription factor MYB39	3.24157
Cc04_g04160	GSCOC_T00022136001	Uncharacterized protein	3.24042
Cc04_g08830	GSCOC_T00022757001	CCA1	3.2379
Cc06_g15980	GSCOC_T00030750001	18 kDa seed maturation	3.23707
Cc06_g04510	GSCOC_T00042962001	Aquaporin TIP1-1	3.23414
Cc00_g15750	GSCOC_T00000083001	Small ubiquitin-related modifier 2	3.22765
Cc10_g14390	GSCOC_T00012037001	Nitrate reductas	3.22429
Cc00_g03110	GSCOC_T00003067001	Annexin RJ4	3.20764
Cc02_g20260	GSCOC_T00014634001	Probable xyloglucan endotransglucosylase hydrolase 10	3.19674
Cc07_g12970	GSCOC_T00036807001	Uncharacterized protein	3.1814
Cc06_g13600	GSCOC_T00041373001	Pathogenesis-related PR-1	3.17969
Cc06_g01800	GSCOC_T00023414001	O-fucosyltransferase 1	3.15915
Cc09_g10000	GSCOC_T00041102001	Uncharacterized protein	3.15201
Cc01_g12070	GSCOC_T00028128001	Uncharacterized protein	3.14838
Cc02_g11470	GSCOC_T00029408001	Serine carboxypeptidase-like 27	3.14565
Cc05_g02920	GSCOC_T00033458001	1-aminocyclopropane-1-carboxylate oxidase 4	3.14026
Cc01_g10260	GSCOC_T00024109001	Zinc finger ZAT5	3.1392
Cc01_g21490	GSCOC_T00004974001	Uncharacterized protein	3.13661
Cc11_g02540	GSCOC_T00018514001	Cytosolic sulfotransferase 15	3.13518
Cc08_g07410	GSCOC_T00025369001	Premnaspirodiene oxygenase	3.13095
Cc01_g04050	GSCOC_T00040848001	G-type lectin S-receptor-like serine threonine- kinase RLK1	3.12912
Cc03_g06860	GSCOC_T00026510001	Auxin-induced in root cultures 12	3.12889
Cc02_g02140	GSCOC_T00020060001	G-type lectin S-receptor-like serine threonine- kinase At5g24080	3.11243
Cc00_g00740	GSCOC_T00036186001	NADPH-dependent oxidoreductase 2-alkenal reductase	3.10748
Cc00_g34570	GSCOC_T00006097001	Cytochrome P450 71B36	3.10678
Cc06_g13940	GSCOC_T00041327001	EG45-like domain containing 1	3.10392
Cc02_g11550	GSCOC_T00029398001	Tryptophan synthase beta chain chloroplastic	3.09792
Cc02_g21830	GSCOC_T00014831001	Beta-xylosidase alpha-L-arabinofuranosidase 2	3.09744
Cc06_g04690	GSCOC_T00042987001	Probable pectinesterase 8	3.09607
Cc02_g16600	GSCOC_T00014153001	Snakin-2	3.095
Cc11_g06330	GSCOC_T00020643001	Beta-glucosidase 18	3.09385
Cc04_g07830	GSCOC_T00022621001	Uncharacterized protein	3.09135
Cc02_g12130	GSCOC_T00029329001	G-type lectin S-receptor-like serine threonine- kinase B120	3.08202
Cc00_g33180	GSCOC_T00003246001	Endochitinase B	3.07659
Cc08_g13570	GSCOC_T00030328001	Blue copper	3.07356
Cc03_g00700	GSCOC_T00025662001	Calmodulin 4	3.07081
Cc02_g38150	GSCOC_T00027901001	Cytochrome P450 86A2	3.05434
Cc11_g15290	GSCOC_T00038039001	Polygalacturonase At1g48100	3.02407
Cc00_g24090	GSCOC_T00001079001	GDSL esterase lipase At1g28570	3.02376
Cc04_g14210	GSCOC_T00035952001	Probable boron transporter 2	3.01988
Cc01_g16330	GSCOC_T00016455001	Auxin-induced in root cultures 12	3.01228
Cc05_g04090	GSCOC_T00031589001	Mitogen-activated kinase kinase kinase A	3.01022
Cc10_g09790	GSCOC_T00031499001	germin 2-1	3.00854
Cc02_g17940	GSCOC_T00014325001	DETOXIFICATION 41	3.00778
Cc05_g08990	GSCOC_T00002685001	Epidermis-specific secreted glyco EP1	3.00259
Cc10_g06570	GSCOC_T00034637001	E3 ubiquitin- ligase ATL15	3.00088
Cc01_g13170	GSCOC_T00028280001	Uncharacterized protein	2.99897
Cc10_g04900	GSCOC_T00034879001	Probable isoaspartyl peptidase L-asparaginase 2	2.99806
Cc11_g09530	GSCOC_T00032706001	Zinc finger CCCH domain-containing 15	2.98143
Cc08_g05520	GSCOC_T00024325001	Cytosolic sulfotransferase 5	2.97241
Cc07_g08480	GSCOC_T00040222001	Zinc finger CCCH domain-containing 15	2.96643
Cc07_g10720	GSCOC_T00037082001	Uncharacterized protein	2.96483
Cc08_g13750	GSCOC_T00030308001	Uncharacterized protein	2.96207
Cc06_g13700	GSCOC_T00041357001	Probable receptor-like serine threonine- kinase At5g57670	2.95834
Cc02_g32950	GSCOC_T00016726001	Shikimate dehydrogenase (NADP(+))	2.95341
Cc06_g09470	GSCOC_T00041911001	Serine incorporator 3	2.94811
Cc02_g05160	GSCOC_T00039017001	Pheophorbidase	2.94633
Cc08_g04630	GSCOC_T00015666001	Palmitoleoyl- carboxylesterase NOTUM	2.94357
Cc07_g17740	GSCOC_T00018858001	G-type lectin S-receptor-like serine threonine- kinase RLK1	2.94106
Cc01_g21240	GSCOC_T00005004001	Uncharacterized protein	2.9395
Cc01_g14440	GSCOC_T00028443001	Mitogen-activated kinase kinase kinase A	2.93709
Cc02_g15570	GSCOC_T00014011001	Uncharacterized protein	2.9354
Cc03_g05810	GSCOC_T00026350001	Phosphate transporter PHO1	2.93514
Cc07_g12350	GSCOC_T00036885001	10-deacetylbaccatin III 10-O-acetyltransferase	2.93464
Cc03_g14300	GSCOC_T00031828001	Uncharacterized protein	2.93456
Cc02_g02860	GSCOC_T00020155001	Oxalate-- ligase	2.93414
Cc08_g02340	GSCOC_T00037702001	NRT1 PTR FAMILY	2.92078
Cc03_g04540	GSCOC_T00026176001	3-ketoacyl- synthase 2	2.92045
Cc08_g10830	GSCOC_T00027062001	IQ-DOMAIN 14	2.91294
Cc11_g06520	GSCOC_T00020669001	LRR receptor-like serine threonine- kinase ERL1	2.8993
Cc10_g03270	GSCOC_T00024850001	Anthocyanidin 3-O-glucosyltransferase 5	2.89881
Cc03_g10100	GSCOC_T00031012001	Major allergen Pru ar 1	2.89712
Cc01_g16640	GSCOC_T00016416001	Ninja-family AFP3	2.89556
Cc01_g00370	GSCOC_T00013679001	Benzyl alcohol O-benzoyltransferase	2.88603
Cc02_g23850	GSCOC_T00015089001	Probable methyltransferase PMT21	2.88358
Cc07_g11600	GSCOC_T00036983001	DETOXIFICATION chloroplastic	2.88298
Cc07_g11160	GSCOC_T00037032001	RING finger 44	2.87959
Cc06_g07350	GSCOC_T00031274001	Sugar transport 7	2.87958
Cc02_g30540	GSCOC_T00023779001	Beta-glucosidase 24	2.8779
Cc00_g03770	GSCOC_T00002032001	Probable mitochondrial chaperone BCS1-B	2.86699
Cc06_g15870	GSCOC_T00030765001	Uncharacterized protein	2.86688
Cc02_g25340	GSCOC_T00028758001	Ankyrin repeat-containing At5g02620	2.85757
Cc09_g10340	GSCOC_T00041057001	Serine threonine phosphatase 2A 59 kDa regulatory subunit B eta isoform	2.85662
Cc05_g12660	GSCOC_T00021161001	Uncharacterized protein	2.85594
Cc07_g11210	GSCOC_T00037027001	Peroxidase 64	2.85472
Cc09_g07200	GSCOC_T00036300001	Reticuline oxidase	2.85324
Cc02_g24650	GSCOC_T00028858001	Cyclin-U2-2	2.85104
Cc02_g08370	GSCOC_T00029800001	Receptor kinase THESEUS 1	2.84889
Cc06_g05900	GSCOC_T00043158001	Uncharacterized protein At3g28850	2.84692
Cc06_g00370	GSCOC_T00023212001	Uncharacterized protein	2.84633
Cc04_g11500	GSCOC_T00037341001	Tropinone reductase homolog At1g07440	2.84336
Cc03_g04190	GSCOC_T00026128001	IQ-DOMAIN 31	2.84281
Cc06_g18690	GSCOC_T00040495001	BURP domain-containing 3	2.84047
Cc06_g01530	GSCOC_T00023375001	Glycerol-3-phosphate 2-O-acyltransferase 6	2.83057
Cc07_g05540	GSCOC_T00039830001	GDSL esterase lipase At2g23540	2.82616
Cc02_g27160	GSCOC_T00025036001	Vicianin hydrolase (Fragment)	2.82126
Cc03_g00840	GSCOC_T00025681001	Receptor kinase ANXUR2	2.82109
Cc07_g05330	GSCOC_T00039803001	Uncharacterized protein	2.81978
Cc05_g04710	GSCOC_T00035003001	Vacuolar amino acid transporter 1	2.81949
Cc10_g11640	GSCOC_T00001438001	Uncharacterized protein	2.8175
Cc08_g08240	GSCOC_T00007244001	Uncharacterized protein	2.81616
Cc07_g10080	GSCOC_T00037161001	Peroxidase 72	2.81297
Cc11_g05570	GSCOC_T00020515001	UDP-glycosyltransferase 83A1	2.81044
Cc07_g16990	GSCOC_T00037488001	Flavonoid 3	2.80254
Cc07_g14930	GSCOC_T00036551001	UDP-glycosyltransferase 85A2	2.80036
Cc10_g03370	GSCOC_T00024861001	Pathogenesis-related 5	2.80023
Cc05_g10800	GSCOC_T00021396001	Uncharacterized protein	2.79846
Cc06_g02430	GSCOC_T00023499001	Laccase-17	2.79139
Cc08_g16530	GSCOC_T00035616001	Transcription factor MYB4	2.79052
Cc11_g12870	GSCOC_T00032255001	Cyclic dof factor 2	2.78055
Cc10_g13450	GSCOC_T00035291001	Uncharacterized protein	2.77948
Cc02_g19540	GSCOC_T00014522001	Uncharacterized protein	2.77839
Cc10_g03280	GSCOC_T00024851001	Probable GMP synthas	2.77829
Cc06_g18280	GSCOC_T00040435001	Glucan endo-	2.77487
Cc11_g08170	GSCOC_T00032911001	21 kDa	2.76721
Cc07_g08170	GSCOC_T00040181001	Uncharacterized protein	2.7644
Cc06_g16300	GSCOC_T00030712001	Polygalacturonase inhibitor	2.76174
Cc01_g21250	GSCOC_T00005003001	Transcription factor MYB12	2.7607
Cc09_g09080	GSCOC_T00023109001	Purine permease 21	2.76066
Cc02_g06330	GSCOC_T00039160001	Uncharacterized protein	2.75591
Cc02_g13460	GSCOC_T00029149001	Transcription factor bHLH36	2.753
Cc06_g03920	GSCOC_T00023692001	Uncharacterized protein	2.75163
Cc07_g03470	GSCOC_T00039578001	Cyclic dof factor 2	2.74864
Cc01_g04380	GSCOC_T00004461001	Mannose glucose-specific lectin (Fragment)	2.74359
Cc11_g09690	GSCOC_T00032687001	Reticulon B9	2.73964
Cc08_g16800	GSCOC_T00035654001	2-hydroxymuconate semialdehyde hydrolase	2.73808
Cc05_g10420	GSCOC_T00021444001	Uncharacterized protein	2.73565
Cc09_g08800	GSCOC_T00020863001	Auxin-induced 5NG4	2.73352
Cc05_g11370	GSCOC_T00021326001	N-acetylneuraminate 9-O-acetyltransferase	2.72877
Cc08_g16320	GSCOC_T00035589001	3-oxoacyl	2.72851
Cc01_g01960	GSCOC_T00019276001	Uncharacterized protein	2.72807
Cc03_g07230	GSCOC_T00026566001	Probable pectate lyase 15	2.72621
Cc02_g12070	GSCOC_T00029335001	G-type lectin S-receptor-like serine threonine- kinase At1g61490	2.72523
Cc05_g02890	GSCOC_T00020866001	1-aminocyclopropane-1-carboxylate oxidase 1	2.71966
Cc10_g07520	GSCOC_T00034512001		2.71503
Cc05_g10640	GSCOC_T00021414001	Uncharacterized protein	2.71023
Cc00_g25930	GSCOC_T00006248001	Uncharacterized protein	2.70869
Cc05_g05850	GSCOC_T00035172001	UDP-glucose flavonoid 3-O-glucosyltransferase 6	2.70674
Cc02_g04180	GSCOC_T00020322001	Beta- soluble isoenzyme I	2.70617
Cc01_g03980	GSCOC_T00040868001	G-type lectin S-receptor-like serine threonine- kinase RLK1	2.70564
Cc04_g12840	GSCOC_T00003258001	U-box domain-containing 19	2.70403
Cc11_g04690	GSCOC_T00042895001	COBRA	2.70266
Cc03_g10850	GSCOC_T00042017001	Uncharacterized protein	2.69932
Cc05_g08570	GSCOC_T00016882001	Uncharacterized protein	2.69567
Cc08_g04970	GSCOC_T00042467001	Cytosolic sulfotransferase 5	2.69333
Cc10_g10340	GSCOC_T00031426001	BAG family molecular chaperone regulator 3	2.69174
Cc06_g23640	GSCOC_T00040543001	Heavy metal-associated isoprenylated plant 26	2.69153
Cc01_g00040	GSCOC_T00012436001	Benzyl alcohol O-benzoyltransferase	2.69057
Cc05_g13540	GSCOC_T00021050001	Serine threonine- kinase PBS1	2.6889
Cc06_g06480	GSCOC_T00031377001	Exocyst complex component 7	2.68852
Cc00_g00340	GSCOC_T00036115001	Flavin-containing monooxygenase FMO GS-OX-like 2	2.68835
Cc07_g15590	GSCOC_T00036457001	L-ascorbate oxidase	2.68265
Cc04_g04750	GSCOC_T00022210001	Uncharacterized protein	2.68258
Cc02_g37590	GSCOC_T00027968001	Uncharacterized protein	2.68023
Cc04_g11390	GSCOC_T00037312001	Uncharacterized protein	2.67982
Cc00_g28540	GSCOC_T00010333001	UDP-glucose 6-dehydrogenase 1	2.67832
Cc08_g10660	GSCOC_T00027038001	Uncharacterized protein	2.66882
Cc02_g14040	GSCOC_T00029066001	F-box At1g22220	2.66864
Cc02_g07390	GSCOC_T00029947001	Probable E3 ubiquitin- ligase HERC1	2.66546
Cc00_g06800	GSCOC_T00007409001	Fasciclin-like arabinogalactan 1	2.66528
Cc05_g05510	GSCOC_T00035120001	Xyloglucan endotransglucosylase hydrolase 9	2.66483
Cc02_g16970	GSCOC_T00014199001	Endoglucanase 24	2.65882
Cc10_g03210	GSCOC_T00024843001	Auxilin-related 2	2.65761
Cc06_g18940	GSCOC_T00028933001	STRICTOSIDINE SYNTHASE-LIKE 12	2.6507
Cc08_g11830	GSCOC_T00012608001	Uncharacterized protein	2.64844
Cc10_g15010	GSCOC_T00033663001	Cellulose synthase A catalytic subunit	2.64117
Cc00_g23340	GSCOC_T00012065001	O-acyltransferase WSD1	2.64084
Cc06_g17740	GSCOC_T00040362001	Uncharacterized protein	2.63766
Cc02_g33580	GSCOC_T00015395001	Probable nucleoredoxin 1-2	2.63696
Cc02_g18970	GSCOC_T00014459001	Caffeoyl- O-methyltransferase 1	2.63648
Cc04_g02470	GSCOC_T00021919001	Uncharacterized protein	2.63253
Cc07_g08370	GSCOC_T00040209001	Uncharacterized protein	2.63093
Cc07_g15530	GSCOC_T00036464001	Inositol-3-phosphate synthase	2.62927
Cc02_g04540	GSCOC_T00020371001	Hexose carrier HEX6	2.62841
Cc03_g02040	GSCOC_T00025839001	SRG1	2.62716
Cc10_g08940	GSCOC_T00034320001	Probable feruloyl esterase A	2.62698
Cc02_g04220	GSCOC_T00020329001	14 kDa proline-rich	2.62459
Cc07_g13250	GSCOC_T00036766001	Aspartic ase nepenthesin-1	2.62094
Cc01_g13860	GSCOC_T00028368001	Laccase-4	2.61992
Cc06_g20870	GSCOC_T00015855001	Mitogen-activated kinase kinase kinase ANP1	2.61897
Cc09_g07020	GSCOC_T00036327001	Uncharacterized protein	2.61877
Cc00_g18080	GSCOC_T00007955001	Germin subfamily T member 2	2.61496
Cc01_g20540	GSCOC_T00015920001	Nuclear transcription factor Y subunit B-5	2.61335
Cc04_g02600	GSCOC_T00021935001	ABC transporter G family member 36	2.61328
Cc03_g01290	GSCOC_T00025735001	Major allergen Pru ar 1	2.60785
Cc08_g07420	GSCOC_T00025370001	Santalene and bergamotene chloroplastic	2.60488
Cc10_g05620	GSCOC_T00034786001	Uncharacterized protein	2.60111
Cc00_g11500	GSCOC_T00012347001	Uncharacterized protein At5g65660	2.60011
Cc11_g04520	GSCOC_T00004804001	LRR receptor-like serine threonine- kinase GSO1	2.5974
Cc09_g02170	GSCOC_T00017710001	Aquaporin PIP2-1	2.59397
Cc03_g09190	GSCOC_T00042703001	Probable xyloglucan endotransglucosylase hydrolase 16	2.59158
Cc05_g13590	GSCOC_T00021041001	Transmembrane 189	2.58808
Cc02_g27550	GSCOC_T00025086001	DNA damage-repair toleration DRT100	2.58461
Cc04_g03910	GSCOC_T00022106001	EH domain-containing 1	2.58279
Cc01_g15050	GSCOC_T00016611001	Uncharacterized protein	2.58113
Cc07_g07490	GSCOC_T00040098001	1-aminocyclopropane-1-carboxylate synthase 3	2.57844
Cc06_g14650	GSCOC_T00041228001	DETOXIFICATION 2	2.57624
Cc02_g16940	GSCOC_T00014196001	B-box zinc finger 22	2.57218
Cc09_g05370	GSCOC_T00007119001	Polygalacturonase QRT3	2.57026
Cc03_g01620	GSCOC_T00025779001	DETOXIFICATION 6	2.56966
Cc05_g13390	GSCOC_T00021069001	Uncharacterized protein	2.56751
Cc03_g07650	GSCOC_T00026622001	Uncharacterized protein	2.56554
Cc03_g15230	GSCOC_T00026792001	Probable leucine-rich repeat receptor kinase At5g49770	2.56312
Cc01_g09450	GSCOC_T00023999001	Fatty acyl- reductase 3	2.56306
Cc03_g01550	GSCOC_T00025770001	Uncharacterized protein	2.56127
Cc06_g18490	GSCOC_T00040465001	GAST1	2.54829
Cc04_g01920	GSCOC_T00021856001	Uncharacterized protein	2.5474
Cc06_g06110	GSCOC_T00043182001	Beta- insoluble isoenzyme 1	2.53936
Cc03_g10090	GSCOC_T00031011001	Major allergen Pru ar 1	2.53773
Cc00_g22750	GSCOC_T00008891001	Reticuline oxidase	2.53723
Cc09_g10800	GSCOC_T00041000001	Uncharacterized protein	2.53558
Cc11_g06700	GSCOC_T00020695001	MACPF domain-containing At1g14780	2.5354
Cc02_g39490	GSCOC_T00027708001	Ethylene-responsive transcription factor ERF023	2.53425
Cc11_g14370	GSCOC_T00032066001	MLP 423	2.52861
Cc02_g32840	GSCOC_T00016704001	BONZAI 3	2.52637
Cc02_g14600	GSCOC_T00013876001	Uncharacterized protein	2.52442
Cc02_g02690	GSCOC_T00020132001	Uncharacterized protein	2.52383
Cc04_g05270	GSCOC_T00022275001	Uncharacterized protein	2.52379
Cc01_g12090	GSCOC_T00028131001	leucine-rich repeat receptor kinase At2g19210	2.52316
Cc11_g03140	GSCOC_T00025462001	UDP-glycosyltransferase 76E1	2.52265
Cc04_g16610	GSCOC_T00035767001	Gibberellin-regulated 4	2.52069
Cc07_g03360	GSCOC_T00039563001	Zinc-finger homeodomain 2	2.51994
Cc02_g37330	GSCOC_T00028007001	Probable methyltransferase PMT16	2.51725
Cc06_g03390	GSCOC_T00023621001	REVEILLE 3	2.51446
Cc00_g03120	GSCOC_T00003068001	Annexin RJ4	2.513
Cc10_g09230	GSCOC_T00034272001	Uncharacterized protein	2.51247
Cc07_g18830	GSCOC_T00018687001	Nuclear transcription factor Y subunit B-3	2.51137
Cc05_g10390	GSCOC_T00021452001	Hyoscyamine 6-dioxygenase	2.49829
Cc08_g15180	GSCOC_T00035444001	Transcription factor MYB86	2.4981
Cc01_g19400	GSCOC_T00016062001	Ent-copalyl diphosphate chloroplastic	2.49676
Cc05_g08030	GSCOC_T00016811001	Uncharacterized protein	2.49583
Cc02_g13920	GSCOC_T00029079001	GDSL esterase lipase At1g28590	2.49121
Cc11_g08140	GSCOC_T00032916001	PLANT CADMIUM RESISTANCE 2	2.48959
Cc00_g33460	GSCOC_T00002042001	GDSL esterase lipase At5g45910	2.4885
Cc01_g08000	GSCOC_T00015486001	Kinesin KIF15	2.4868
Cc08_g04480	GSCOC_T00015634001	Anthocyanin regulatory C1	2.48675
Cc04_g01080	GSCOC_T00021740001	TIFY 10B	2.48611
Cc02_g23370	GSCOC_T00015030001	Uncharacterized protein	2.48557
Cc08_g01140	GSCOC_T00038426001	Uncharacterized protein	2.48213
Cc08_g10640	GSCOC_T00027036001	Uncharacterized protein	2.48138
Cc11_g10730	GSCOC_T00032540001	Probable transmembrane ascorbate ferrireductase 4	2.48073
Cc01_g03760	GSCOC_T00040931001	Cytochrome P450 81D1	2.47861
Cc00_g27780	GSCOC_T00009995001	Inorganic phosphate transporter 1-4	2.47808
Cc10_g06590	GSCOC_T00034635001	RING-H2 finger ATL54	2.47478
Cc02_g39930	GSCOC_T00027640001	Uncharacterized protein	2.47398
Cc08_g03840	GSCOC_T00034180001	Uncharacterized protein	2.47106
Cc02_g12850	GSCOC_T00029229001	Polyphenol chloroplastic	2.47027
Cc02_g38130	GSCOC_T00027903001	Probable glycerol-3-phosphate acyltransferase 8	2.4687
Cc06_g02050	GSCOC_T00023445001	Rop guanine nucleotide exchange factor 1	2.46821
Cc02_g18010	GSCOC_T00014334001	Uncharacterized protein	2.46783
Cc02_g26400	GSCOC_T00028612001	F-box kelch-repeat SKIP25	2.46387
Cc09_g03020	GSCOC_T00017599001	Ammonium transporter 1 member 2	2.46132
Cc05_g16290	GSCOC_T00038580001	Myb-related Zm1	2.46076
Cc02_g29530	GSCOC_T00018389001	Miraculin	2.45867
Cc00_g27020	GSCOC_T00006600001	Benzoate carboxyl methyltransferase	2.45744
Cc02_g19160	GSCOC_T00014480001	Polygalacturonase inhibitor 1	2.45652
Cc00_g01060	GSCOC_T00015884001	Receptor kinase FERONIA	2.45406
Cc02_g04240	GSCOC_T00020334001	glycerol-3-phosphate transporter 1	2.45353
Cc02_g18810	GSCOC_T00014436001	Abscisic acid 8 -hydroxylase 4	2.45068
Cc01_g07480	GSCOC_T00009395001	Uncharacterized protein	2.45044
Cc00_g06380	GSCOC_T00004113001	Vetispiradiene synthase 1	2.44771
Cc01_g09640	GSCOC_T00024027001	Uncharacterized protein	2.44702
Cc01_g01200	GSCOC_T00037968001	Disease resistance response 206	2.44691
Cc01_g11300	GSCOC_T00024256001	Fasciclin-like arabinogalactan 11	2.44669
Cc05_g11900	GSCOC_T00021256001	Early nodulin 1	2.44475
Cc10_g13060	GSCOC_T00035348001	Cyanidin-3-O-glucoside 2-O-glucuronosyltransferase	2.44327
Cc08_g00620	GSCOC_T00038490001	G-type lectin S-receptor-like serine threonine- kinase SD2-5	2.44116
Cc03_g15530	GSCOC_T00026838001	homolog subfamily B member 6-A	2.43816
Cc02_g08330	GSCOC_T00029808001	Zinc finger ZAT11	2.4378
Cc05_g09710	GSCOC_T00021548001	Uncharacterized protein	2.4368
Cc08_g03750	GSCOC_T00034163001	Cytosolic sulfotransferase 14	2.43559
Cc07_g00690	GSCOC_T00019147001	Blue copper	2.43539
Cc06_g01880	GSCOC_T00023425001	Laccase-7	2.43231
Cc02_g04850	GSCOC_T00020414001	ABHD11	2.43181
Cc02_g05280	GSCOC_T00039032001	Probable WRKY transcription factor 41	2.42886
Cc06_g11390	GSCOC_T00041665001	Beta-galactosidase 1	2.42596
Cc07_g18780	GSCOC_T00018698001	ABC transporter G family member 10	2.42439
Cc00_g25830	GSCOC_T00001794001	1-aminocyclopropane-1-carboxylate oxidase 4	2.4212
Cc05_g03450	GSCOC_T00033559001	Uncharacterized protein RSN1	2.41591
Cc09_g07190	GSCOC_T00036302001	Reticuline oxidase	2.41449
Cc02_g39250	GSCOC_T00027744001	Long chain acyl- synthetase 3	2.41299
Cc06_g20060	GSCOC_T00022904001	G2 mitotic-specific cyclin-1	2.41186
Cc02_g22570	GSCOC_T00014932001	Glutelin type-A 2	2.41127
Cc02_g26840	GSCOC_T00024989001	Uncharacterized protein	2.41114
Cc02_g01380	GSCOC_T00019960001	Bifunctional epoxide hydrolase 2	2.40898
Cc10_g05400	GSCOC_T00034809001	Isoflavone 2 -hydroxylase	2.40877
Cc10_g00290	GSCOC_T00024477001	Uncharacterized protein	2.4078
Cc02_g00720	GSCOC_T00019862001	Heavy metal-associated isoprenylated plant 26	2.40567
Cc07_g17560	GSCOC_T00008839001	Auxin-induced 5NG4	2.4055
Cc04_g10740	GSCOC_T00042644001	Probable pectate lyase 22	2.40509
Cc06_g05670	GSCOC_T00043129001	Germin subfamily 3 member 2	2.40073
Cc00_g15700	GSCOC_T00006886001	Monoglyceride lipase	2.40055
Cc07_g10500	GSCOC_T00037107001	Probable LRR receptor-like serine threonine- kinase At4g36180	2.39973
Cc03_g01070	GSCOC_T00025710001	Beta-D-xylosidase 1	2.39962
Cc02_g09600	GSCOC_T00029636001	Uncharacterized protein	2.39933
Cc04_g07150	GSCOC_T00022521001	Uncharacterized protein	2.39892
Cc02_g19950	GSCOC_T00014575001	Nucleobase-ascorbate transporter 7	2.39842
Cc09_g04640	GSCOC_T00017400001	Probable LRR receptor-like serine threonine- kinase RPK1	2.39549
Cc10_g06870	GSCOC_T00034602001	Uncharacterized protein	2.39352
Cc11_g06250	GSCOC_T00020631001	Blue copper	2.3911
Cc11_g11380	GSCOC_T00032451001	Peroxiredoxin-like 2A	2.38872
Cc00_g27610	GSCOC_T00003289001	Transcription factor bHLH27	2.38811
Cc02_g39780	GSCOC_T00027668001	Cytochrome P450 78A3	2.38791
Cc04_g10550	GSCOC_T00042610001	UPF0481 At3g47200	2.38724
Cc10_g03590	GSCOC_T00024889001	Wall-associated receptor kinase-like 14	2.38563
Cc09_g03130	GSCOC_T00017586001	GDSL esterase lipase At5g33370	2.38519
Cc02_g11290	GSCOC_T00029429001	GATA transcription factor 11	2.38426
Cc10_g16430	GSCOC_T00013405001	GDSL esterase lipase At1g33811	2.38368
Cc04_g05230	GSCOC_T00022270001	Shikimate O-hydroxycinnamoyltransferase	2.38351
Cc05_g13880	GSCOC_T00021006001	Uncharacterized protein	2.3826
Cc06_g12040	GSCOC_T00041583001	Uncharacterized protein	2.37926
Cc02_g10500	GSCOC_T00029523001	Uncharacterized protein	2.377
Cc05_g14580	GSCOC_T00038801001	Kinesin KIF15	2.37119
Cc08_g13880	GSCOC_T00030292001	HOTHEAD	2.36808
Cc06_g05620	GSCOC_T00043121001	Probable purple acid phosphatase 20	2.36637
Cc02_g09710	GSCOC_T00029619001	Uncharacterized protein	2.36513
Cc08_g10430	GSCOC_T00027010001	Pollen-specific SF21	2.36474
Cc00_g19050	GSCOC_T00003248001	Beta-glucosidase 11	2.36371
Cc06_g06630	GSCOC_T00031360001	E3 ubiquitin- ligase PUB23	2.36245
Cc07_g07000	GSCOC_T00040033001	BTB POZ and TAZ domain-containing 4	2.35931
Cc01_g10410	GSCOC_T00024137001	Probable xyloglucan endotransglucosylase hydrolase 32	2.35841
Cc02_g17400	GSCOC_T00014252001	Syntaxin-112	2.35804
Cc11_g00330	GSCOC_T00019466001	Alpha-galactosidase	2.35793
Cc06_g22950	GSCOC_T00040648001	Patatin group A-3	2.35529
Cc05_g12000	GSCOC_T00021245001	SPA1-RELATED 4	2.35497
Cc08_g15930	GSCOC_T00035539001	Uncharacterized protein	2.35277
Cc06_g12500	GSCOC_T00041530001	TIFY 10A	2.35141
Cc10_g10410	GSCOC_T00010112001	UDP-glucose flavonoid 3-O-glucosyltransferase 3	2.35052
Cc02_g14280	GSCOC_T00013835001	GDSL esterase lipase At5g45950	2.34936
Cc06_g14840	GSCOC_T00030911001	Serine carboxypeptidase 24	2.34917
Cc04_g06890	GSCOC_T00022490001	Probable non-specific lipid-transfer AKCS9	2.34809
Cc05_g05970	GSCOC_T00035185001	Malonyl-coenzyme A:anthocyanin 3-O-glucoside-6 -O-malonyltransferase	2.34545
Cc03_g04820	GSCOC_T00026212001	Transcription factor bHLH92	2.34442
Cc05_g00090	GSCOC_T00017027001	Uncharacterized protein	2.33928
Cc00_g28140	GSCOC_T00000224001	Flavonoid 3	2.33808
Cc06_g01620	GSCOC_T00023390001	Laccase-4	2.33753
Cc11_g07780	GSCOC_T00018006001	Pathogenesis-related R major form	2.33568
Cc02_g05680	GSCOC_T00039082001	BTB POZ domain-containing At3g56230	2.33461
Cc06_g03320	GSCOC_T00023613001	E3 ubiquitin- ligase RNF181 homolog	2.32845
Cc02_g16150	GSCOC_T00014092001	GDSL esterase lipase At1g29670	2.32782
Cc10_g01550	GSCOC_T00024629001	Thaumatin	2.32302
Cc03_g14330	GSCOC_T00031831001	Uncharacterized protein	2.32233
Cc01_g12960	GSCOC_T00028253001	Expansin-A4	2.31904
Cc06_g00520	GSCOC_T00023231001	CBL-interacting serine threonine- kinase 14	2.31884
Cc11_g07820	GSCOC_T00008239001	Ankyrin repeat-containing At5g02620	2.31528
Cc02_g05500	GSCOC_T00039061001	Potassium transporter 2	2.31083
Cc08_g08050	GSCOC_T00013081001	Uncharacterized protein	2.31041
Cc02_g22030	GSCOC_T00014859001	Auxin-induced 5NG4	2.30732
Cc02_g09760	GSCOC_T00029613001	Monoacylglycerol lipase ABHD6	2.30678
Cc07_g11550	GSCOC_T00036989001	Endochitinase	2.30653
Cc00_g07320	GSCOC_T00000206001	Somatic embryogenesis receptor kinase 1	2.30644
Cc07_g12480	GSCOC_T00036867001	Probable acyl-activating enzyme 6	2.30548
Cc06_g04440	GSCOC_T00042953001	Uncharacterized protein	2.30504
Cc03_g15180	GSCOC_T00026781001	Cytochrome P450 71A2	2.30457
Cc07_g11750	GSCOC_T00036964001	Dehydrodolichyl diphosphate synthase 6	2.30123
Cc11_g04040	GSCOC_T00034028001	Acidic endochitinase	2.29634
Cc01_g19450	GSCOC_T00016056001	Cyclin-P3-1	2.29216
Cc07_g14260	GSCOC_T00036637001	Probable mitochondrial 2-oxoglutarate malate carrier	2.29163
Cc00_g28320	GSCOC_T00009751001	Receptor 12	2.28735
Cc08_g02570	GSCOC_T00037734001	Uncharacterized protein	2.28712
Cc07_g03350	GSCOC_T00039562001	Myb-related 306	2.28642
Cc07_g12020	GSCOC_T00036930001	Uncharacterized transporter YBR287W	2.28225
Cc00_g20750	GSCOC_T00001383001	Phenylalanine ammonia-lyase	2.2821
Cc02_g37040	GSCOC_T00028044001	Subtilisin-like protease	2.28198
Cc04_g03610	GSCOC_T00022056001	Auxin-induced 22A	2.28132
Cc02_g03440	GSCOC_T00020228001	Post-GPI attachment to s factor 3	2.27842
Cc11_g01470	GSCOC_T00019562001	Pleiotropic drug resistance 1	2.27279
Cc06_g20860	GSCOC_T00015859001	Uncharacterized protein	2.27182
Cc09_g01610	GSCOC_T00017786001	Uncharacterized protein	2.27092
Cc02_g14270	GSCOC_T00013834001	GDSL esterase lipase At5g45960	2.26489
Cc02_g09150	GSCOC_T00029696001	GDSL esterase lipase At5g33370	2.26207
Cc06_g00850	GSCOC_T00023286001	Uncharacterized protein	2.26014
Cc11_g07770	GSCOC_T00018007001	Pathogenesis-related R major form	2.25844
Cc02_g14990	GSCOC_T00013928001	Non-specific lipid-transfer	2.25839
Cc02_g29560	GSCOC_T00018393001	Uncharacterized protein	2.25808
Cc11_g16480	GSCOC_T00038188001	Mitotic spindle checkpoint MAD2	2.257
Cc07_g09470	GSCOC_T00037237001	Uncharacterized protein	2.25619
Cc10_g12030	GSCOC_T00031886001	IAA-amino acid hydrolase ILR1-like 6	2.25541
Cc01_g04940	GSCOC_T00028571001	ABC transporter G family member 15	2.25404
Cc07_g14220	GSCOC_T00036643001	Uncharacterized protein	2.25311
Cc00_g19980	GSCOC_T00001485001	Wall-associated receptor kinase-like 1	2.25201
Cc04_g14860	GSCOC_T00040769001	Probable LRR receptor-like serine threonine- kinase At1g74360	2.25195
Cc05_g13660	GSCOC_T00021034001	Glycine-rich RNA-binding 8	2.24608
Cc00_g13740	GSCOC_T00013297001	Probable pectinesterase pectinesterase inhibitor 12	2.2453
Cc02_g12800	GSCOC_T00029235001	(	2.24168
Cc02_g04520	GSCOC_T00020369001	leucine-rich repeat receptor kinase At2g19210	2.23896
Cc00_g32020	GSCOC_T00005233001	Serine carboxypeptidase-like 35	2.23865
Cc11_g14210	GSCOC_T00032088001	UDP-glycosyltransferase 74B1	2.23795
Cc02_g19940	GSCOC_T00014574001	Rac-like GTP-binding RAC13	2.23786
Cc02_g03510	GSCOC_T00020236001	Uncharacterized protein	2.23464
Cc01_g10050	GSCOC_T00024084001	Agmatine coumaroyltransferase-2	2.23418
Cc10_g15130	GSCOC_T00033681001	Peroxidase 12	2.23373
Cc03_g05310	GSCOC_T00026280001	Deacetoxyvindoline 4-hydroxylase	2.23351
Cc02_g39100	GSCOC_T00027764001	Hydroquinone glucosyltransferase	2.23078
Cc10_g05500	GSCOC_T00034799001	Uncharacterized protein C757.02c	2.22944
Cc06_g15930	GSCOC_T00030756001	Flavonol 3-sulfotransferase	2.22938
Cc11_g16780	GSCOC_T00038225001	Probable inactive leucine-rich repeat receptor kinase At1g66830	2.22913
Cc06_g23480	GSCOC_T00040562001	Leucine-rich repeat extensin 2	2.22571
Cc00_g31960	GSCOC_T00012136001	COBRA 4	2.22441
Cc00_g17790	GSCOC_T00004701001	Uncharacterized protein	2.22344
Cc10_g04210	GSCOC_T00034964001	UDP-glucuronate:xylan alpha-glucuronosyltransferase 2	2.22306
Cc07_g07560	GSCOC_T00040106001	Probable xyloglucan endotransglucosylase hydrolase 6	2.21581
Cc10_g08590	GSCOC_T00034368001	Probable phosphatase 2C 2	2.21535
Cc00_g17190	GSCOC_T00009143001	Beta-amylase chloroplastic	2.21503
Cc03_g12310	GSCOC_T00015237001	Uncharacterized protein	2.21292
Cc03_g12440	GSCOC_T00015219001	GDSL esterase lipase 1	2.21291
Cc06_g01150	GSCOC_T00023326001	Uncharacterized protein	2.21291
Cc02_g16500	GSCOC_T00014143001	Uncharacterized protein	2.21275
Cc07_g10930	GSCOC_T00037057001	MLO 4	2.21179
Cc01_g11390	GSCOC_T00024268001	Uncharacterized protein	2.21106
Cc03_g01110	GSCOC_T00025714001	Uncharacterized protein	2.20961
Cc08_g15820	GSCOC_T00035525001	High mobility group B 6	2.20909
Cc02_g15730	GSCOC_T00014032001	Uncharacterized protein	2.20587
Cc10_g07020	GSCOC_T00034583001	Probable LRR receptor-like serine threonine- kinase At1g06840	2.20503
Cc10_g01130	GSCOC_T00024579001	Uncharacterized protein	2.20432
Cc02_g19900	GSCOC_T00014569001	Pollen-specific SF3	2.20381
Cc11_g08990	GSCOC_T00032801001	UDP-glucose flavonoid 3-O-glucosyltransferase 6	2.20365
Cc01_g19250	GSCOC_T00016086001	Non-specific lipid-transfer At5g64080	2.2033
Cc05_g12740	GSCOC_T00021151001	Dynein light chain cytoplasmic	2.20014
Cc11_g03560	GSCOC_T00006461001	Uncharacterized protein	2.19985
Cc02_g12890	GSCOC_T00029224001	Dof zinc finger	2.19968
Cc02_g16660	GSCOC_T00014159001	Aquaporin TIP3-2	2.19162
Cc05_g15450	GSCOC_T00038690001	Uncharacterized protein At1g08160	2.19158
Cc02_g05340	GSCOC_T00039040001	Probably inactive leucine-rich repeat receptor kinase At3g28040	2.19058
Cc06_g15940	GSCOC_T00030755001	Gibberellin 3-beta-dioxygenase 4	2.18929
Cc02_g11000	GSCOC_T00029467001	Uncharacterized protein	2.18226
Cc00_g12420	GSCOC_T00010385001	disease resistance RGA3	2.18133
Cc04_g05080	GSCOC_T00022253001	WRKY transcription factor 18	2.18128
Cc02_g11970	GSCOC_T00029349001	U-box domain-containing 8	2.18095
Cc09_g04740	GSCOC_T00017387001	Transcription factor MYB86	2.17842
Cc04_g01940	GSCOC_T00021859001	HOTHEAD	2.17258
Cc11_g13310	GSCOC_T00032199001	Homeobox-leucine zipper ATHB-13	2.17149
Cc05_g06010	GSCOC_T00035204001	Malonyl-coenzyme A:anthocyanin 3-O-glucoside-6 -O-malonyltransferase	2.16998
Cc05_g00120	GSCOC_T00017032001	Uncharacterized protein	2.16985
Cc06_g10260	GSCOC_T00041808001	Dehydration-responsive element-binding 3	2.16902
Cc10_g06970	GSCOC_T00034589001	UDP-glycosyltransferase 85A2	2.16739
Cc06_g07460	GSCOC_T00031258001	Uncharacterized protein	2.16705
Cc07_g12280	GSCOC_T00036897001	Uncharacterized transporter	2.16551
Cc04_g09390	GSCOC_T00022826001	Phosphate carrier mitochondrial	2.15553
Cc08_g15360	GSCOC_T00035465001	Respiratory burst oxidase homolog A	2.15531
Cc07_g12760	GSCOC_T00036835001	NAC domain-containing 74	2.15407
Cc09_g01780	GSCOC_T00017765001	DETOXIFICATION 41	2.15349
Cc07_g12770	GSCOC_T00036834001	Probable E3 ubiquitin- ligase HERC1	2.1508
Cc11_g13970	GSCOC_T00032119001	NEP1-interacting -like 2	2.15076
Cc06_g03600	GSCOC_T00023646001	Probable beta-	2.15065
Cc11_g08360	GSCOC_T00032886001	MLP 31	2.14742
Cc05_g02900	GSCOC_T00020864001	1-aminocyclopropane-1-carboxylate oxidase 3	2.1427
Cc01_g09890	GSCOC_T00024060001	Glucomannan 4-beta-mannosyltransferase 2	2.1394
Cc01_g03200	GSCOC_T00033151001	disease resistance RGA4	2.13878
Cc07_g10200	GSCOC_T00037148001	Beta-galactosidase 3	2.13712
Cc05_g08770	GSCOC_T00016909001	Secologanin synthase	2.13449
Cc01_g21160	GSCOC_T00005016001	Kinesin KIN-14G	2.13445
Cc06_g02470	GSCOC_T00023503001	Laccase-17	2.13354
Cc08_g07330	GSCOC_T00025354001	Premnaspirodiene oxygenase	2.13146
Cc04_g15480	GSCOC_T00042320001	Uncharacterized protein	2.13081
Cc02_g12170	GSCOC_T00029320001	zinc finger At1g68190	2.12854
Cc05_g10310	GSCOC_T00021467001	Polyphenol oxidase chloroplastic	2.12784
Cc00_g01360	GSCOC_T00010937001	Probable indole-3-acetic acid-amido synthetase	2.12748
Cc07_g02210	GSCOC_T00039404001	Nephrocystin-3	2.12705
Cc02_g05560	GSCOC_T00039068001	CBL-interacting kinase 2	2.12685
Cc01_g12150	GSCOC_T00028139001	3-ketoacyl- synthase 3	2.12237
Cc05_g14040	GSCOC_T00038867001	Auxin-induced in root cultures 12	2.12214
Cc06_g12720	GSCOC_T00041501001	GDSL esterase lipase 5	2.12094
Cc08_g15910	GSCOC_T00035535001	Probable WRKY transcription factor 41	2.12093
Cc03_g03340	GSCOC_T00026018001	Uncharacterized GPI-anchored At3g06035	2.119
Cc00_g20820	GSCOC_T00008930001	Uncharacterized protein	2.11866
Cc03_g06020	GSCOC_T00026378001	Actin-related 2 3 complex subunit 2	2.11538
Cc06_g16680	GSCOC_T00030651001	polyol transporter 2	2.11528
Cc01_g15410	GSCOC_T00016563001	Root phototropism 2	2.11373
Cc04_g16290	GSCOC_T00035715001	NAC domain-containing 100	2.11309
Cc04_g14350	GSCOC_T00004340001	Uncharacterized protein	2.11193
Cc09_g08670	GSCOC_T00020843001	BAG family molecular chaperone regulator 2	2.10802
Cc04_g03240	GSCOC_T00022017001	Mitochondrial basic amino acids transporter	2.10524
Cc06_g18960	GSCOC_T00028935001	Haloacid dehalogenase-like hydrolase domain-containing 3	2.10235
Cc06_g01260	GSCOC_T00023340001	SRG1	2.10227
Cc09_g00690	GSCOC_T00017914001	Inositol transporter 4	2.10195
Cc00_g32210	GSCOC_T00006454001	Disease resistance At4g27190	2.10094
Cc10_g13340	GSCOC_T00035310001	Uncharacterized acetyltransferase At3g50280	2.1007
Cc07_g05340	GSCOC_T00039804001	CASP 5C3	2.09706
Cc11_g07740	GSCOC_T00018010001	SEC14 cytosolic factor	2.09586
Cc02_g21960	GSCOC_T00014847001	Peroxidase 43	2.09418
Cc06_g04520	GSCOC_T00042964001	Zinc finger ZAT5	2.09138
Cc02_g12470	GSCOC_T00029277001	Uncharacterized protein	2.0899
Cc08_g14730	GSCOC_T00035379001	Uncharacterized protein	2.089
Cc04_g09860	GSCOC_T00042517001	HVA22 e	2.08876
Cc10_g13600	GSCOC_T00035263001	Probable calcium-binding CML44	2.08794
Cc02_g14570	GSCOC_T00013870001	GDSL esterase lipase At1g28580	2.08708
Cc10_g07750	GSCOC_T00034483001	Squalene monooxygenase	2.08668
Cc01_g14540	GSCOC_T00028456001	N-alpha-acetyltransferase 20	2.0853
Cc02_g39370	GSCOC_T00027725001	O-acyltransferase WSD1	2.08506
Cc07_g03260	GSCOC_T00039550001	Tubulin alpha chain	2.08371
Cc06_g12210	GSCOC_T00041565001	Probable serine threonine- kinase PBL8	2.08151
Cc05_g15260	GSCOC_T00038712001	E3 ubiquitin- ligase At4g11680	2.08085
Cc02_g04190	GSCOC_T00020324001	Trehalose-phosphate phosphatase A	2.08045
Cc09_g09980	GSCOC_T00041104001	Bidirectional sugar transporter SWEET2a	2.08004
Cc09_g01560	GSCOC_T00017793001	5 -adenylylsulfate reductase chloroplastic	2.07899
Cc02_g26850	GSCOC_T00024991001	Probable carboxylesterase 1	2.07887
Cc06_g04770	GSCOC_T00043000001	Uncharacterized protein	2.07877
Cc04_g03300	GSCOC_T00022023001	Acid phosphatase 1	2.07703
Cc10_g15550	GSCOC_T00033741001	Uncharacterized protein	2.07431
Cc01_g07700	GSCOC_T00015443001	E3 ubiquitin- ligase PUB23	2.07336
Cc07_g15170	GSCOC_T00036510001	Ras-related RABH1e	2.07299
Cc03_g02000	GSCOC_T00025835001	Probable phosphatase 2C 40	2.07264
Cc04_g05860	GSCOC_T00022355001	Ethylene-responsive transcription factor ERF114	2.0717
Cc11_g02580	GSCOC_T00025570001	Inactive leucine-rich repeat receptor-like serine threonine- kinase At1g60630	2.07144
Cc01_g06530	GSCOC_T00030041001	Cucumber peeling cupredoxin	2.07135
Cc02_g21140	GSCOC_T00014750001	Uncharacterized protein	2.06715
Cc02_g14230	GSCOC_T00013829001	Rac-like GTP-binding RAC13	2.06673
Cc01_g21770	GSCOC_T00004940001	S-acyltransferase 18	2.06644
Cc09_g08990	GSCOC_T00023120001	Uncharacterized protein	2.06302
Cc02_g20780	GSCOC_T00014697001	glutamine amidotransferase YLR126C	2.06216
Cc00_g22290	GSCOC_T00006006001	GEM 4	2.06112
Cc02_g02900	GSCOC_T00020159001	O-glucosyltransferase rumi homolog	2.0586
Cc05_g11880	GSCOC_T00021258001	Uncharacterized protein	2.05851
Cc02_g03540	GSCOC_T00020241001	HOTHEAD	2.05688
Cc10_g03550	GSCOC_T00024882001	Uncharacterized protein	2.05667
Cc05_g09310	GSCOC_T00002647001	Uncharacterized protein	2.05604
Cc01_g00410	GSCOC_T00005541001	Calreticulin-1	2.0556
Cc05_g00650	GSCOC_T00017108001	Uncharacterized protein	2.05455
Cc01_g17750	GSCOC_T00016287001	Uncharacterized protein	2.05122
Cc06_g05630	GSCOC_T00043122001	Uncharacterized protein	2.05042
Cc06_g09860	GSCOC_T00041858001	Rho guanine nucleotide exchange factor 8	2.05018
Cc11_g17070	GSCOC_T00038263001	Uncharacterized protein	2.04929
Cc01_g10980	GSCOC_T00024214001	UDP-xylose transporter 3	2.04769
Cc09_g03590	GSCOC_T00017527001	Uncharacterized protein	2.046
Cc03_g07470	GSCOC_T00026599001	F-box PP2-B10	2.04363
Cc06_g16380	GSCOC_T00030701001	Ras-related RABA4d	2.04354
Cc06_g03740	GSCOC_T00023665001	Uncharacterized protein	2.0433
Cc11_g11780	GSCOC_T00032400001	Cytochrome P450 85A	2.04168
Cc02_g16450	GSCOC_T00014135001	Uncharacterized protein	2.04083
Cc11_g13770	GSCOC_T00032139001	Glycerol-3-phosphate 2-O-acyltransferase 6	2.04055
Cc04_g05040	GSCOC_T00022245001	Bifunctional dihydroflavonol 4-reductase flavanone 4-reductase	2.0396
Cc11_g01760	GSCOC_T00019521001	Uncharacterized protein	2.03826
Cc07_g14900	GSCOC_T00036556001	UDP-glycosyltransferase 85A3	2.03619
Cc02_g21800	GSCOC_T00014827001	Aminotransferase chloroplastic	2.03576
Cc02_g06820	GSCOC_T00039233001	Probable aquaporin PIP1-2	2.03449
Cc01_g00750	GSCOC_T00011069001	Cytokinin riboside 5 -monophosphate phosphoribohydrolase LOG8	2.03342
Cc07_g12890	GSCOC_T00036818001	B3 domain-containing REM17	2.03314
Cc03_g16110	GSCOC_T00002122001	Cellulose synthase D5	2.032
Cc01_g13980	GSCOC_T00028383001	Josephin	2.03085
Cc00_g08090	GSCOC_T00006943001	Deacetylvindoline O-acetyltransferase	2.03041
Cc09_g07240	GSCOC_T00036291001	Reticuline oxidase	2.02956
Cc04_g10730	GSCOC_T00042643001	DNA polymerase III subunit gamma tau	2.02931
Cc02_g21620	GSCOC_T00014806001	Uncharacterized protein	2.02741
Cc09_g07370	GSCOC_T00036271001	Patellin-4	2.02595
Cc06_g12250	GSCOC_T00041561001	LURP-one-related 16	2.0248
Cc04_g04250	GSCOC_T00022147001	Ethylene-responsive transcription factor SHINE 3	2.01872
Cc07_g11680	GSCOC_T00036973001	G2 mitotic-specific cyclin-1	2.01596
Cc10_g15140	GSCOC_T00033682001	Peroxidase 12	2.01549
Cc02_g13800	GSCOC_T00029095001	Cytochrome P450 86A1	2.01385
Cc01_g01950	GSCOC_T00019274001	Uncharacterized protein	2.0133
Cc06_g06470	GSCOC_T00031379001	Uncharacterized protein	2.01279
Cc11_g10680	GSCOC_T00032546001	CLAVATA3 ESR (CLE)-related 13	2.01208
Cc00_g15670	GSCOC_T00008808001	Omega-hydroxypalmitate O-feruloyl transferase	2.00931
Cc01_g21330	GSCOC_T00004992001	Uncharacterized protein	2.00845
Cc08_g00710	GSCOC_T00038478001	Phospholipase D alpha 1	2.00555
Cc02_g36340	GSCOC_T00003937001	Probable carboxylesterase 8	2.00539
Cc08_g04660	GSCOC_T00004723001	Cytosolic sulfotransferase 15	2.00417
Cc02_g01620	GSCOC_T00019989001	Probable pectinesterase pectinesterase inhibitor 34	2.00274
Cc05_g02850	GSCOC_T00020872001	Glucan endo-	2.00268
Cc07_g03490	GSCOC_T00039583001	Expansin-A15	2.00233
Cc11_g01380	GSCOC_T00019574001	Uncharacterized protein	1.99839
Cc07_g12620	GSCOC_T00036850001	Uncharacterized protein	1.99799
Cc02_g27300	GSCOC_T00025057001	O-fucosyltransferase 1	1.99793
Cc07_g19200	GSCOC_T00018625001	Aspartic ase nepenthesin-1	1.99722
Cc04_g16460	GSCOC_T00035747001	Cytosolic sulfotransferase 5	1.99678
Cc02_g17170	GSCOC_T00014223001	Beta-galactosidase 3	1.99161
Cc08_g14880	GSCOC_T00035399001	Cytochrome P450 86A2	1.99146
Cc08_g11590	GSCOC_T00027163001	Uncharacterized protein	1.98991
Cc11_g03100	GSCOC_T00025467001	UDP-glycosyltransferase 76E3	1.98906
Cc10_g13460	GSCOC_T00035289001	Uncharacterized protein	1.98662
Cc07_g03720	GSCOC_T00039617001	Probable serine threonine- kinase At1g54610	1.98427
Cc10_g09100	GSCOC_T00034296001	LRR receptor-like serine threonine- kinase GSO1	1.9841
Cc02_g25390	GSCOC_T00028752001	Uncharacterized protein At1g28695	1.98404
Cc11_g08390	GSCOC_T00032883001	MLP 423	1.98145
Cc11_g11930	GSCOC_T00032381001	Ninja-family AFP3	1.98041
Cc06_g16520	GSCOC_T00030679001	Uncharacterized protein	1.98038
Cc09_g06500	GSCOC_T00005101001	Uncharacterized protein	1.98004
Cc05_g01770	GSCOC_T00015755001	ASPARTIC PROTEASE IN GUARD CELL 1	1.97964
Cc05_g06100	GSCOC_T00009863001	Beta-amylase	1.97922
Cc02_g18540	GSCOC_T00014400001	CDPK-related kinase	1.97612
Cc00_g20890	GSCOC_T00001070001	disease resistance RGA3	1.97549
Cc07_g02190	GSCOC_T00039402001	L-aspartate oxidase	1.97416
Cc02_g19820	GSCOC_T00014558001	Uncharacterized protein	1.97351
Cc02_g36910	GSCOC_T00003860001	Uncharacterized protein	1.9734
Cc02_g19350	GSCOC_T00014501001	Transcription factor bHLH113	1.97199
Cc11_g14360	GSCOC_T00032067001	Serine threonine- kinase PBS1	1.97038
Cc02_g03700	GSCOC_T00020263001	Subtilisin-like protease	1.96998
Cc04_g14280	GSCOC_T00001598001	Alpha-galactosidase	1.96956
Cc04_g06810	GSCOC_T00022480001	Uncharacterized protein	1.96895
Cc06_g06900	GSCOC_T00031327001	Fasciclin-like arabinogalactan 17	1.9678
Cc01_g12260	GSCOC_T00028156001	Aquaporin TIP1-1	1.96617
Cc02_g24560	GSCOC_T00028868001	Metalloendo ase 1	1.96455
Cc11_g12860	GSCOC_T00032256001	Probable calcium-binding CML46	1.96249
Cc06_g09290	GSCOC_T00041932001	Uncharacterized protein	1.96154
Cc07_g07690	GSCOC_T00040128001	Kinesin KIF18B	1.96129
Cc06_g23230	GSCOC_T00040603001	Uncharacterized protein	1.95954
Cc07_g18590	GSCOC_T00018730001	Auxin-induced 5NG4	1.95954
Cc06_g09440	GSCOC_T00041914001	Heavy metal-associated isoprenylated plant 26	1.95885
Cc09_g07440	GSCOC_T00036257001	Reticuline oxidase	1.95764
Cc02_g02870	GSCOC_T00020156001	Tubulin beta-8 chain	1.95424
Cc11_g12310	GSCOC_T00032335001	Uncharacterized protein	1.95423
Cc08_g01410	GSCOC_T00038392001	Ankyrin repeat-containing At5g02620	1.9507
Cc01_g16730	GSCOC_T00016406001	Uncharacterized protein	1.95007
Cc06_g08240	GSCOC_T00031156001	Stellacyanin	1.94955
Cc02_g14530	GSCOC_T00013864001	GDSL esterase lipase At1g28570	1.94853
Cc06_g11410	GSCOC_T00041663001	Uncharacterized protein	1.9464
Cc06_g00260	GSCOC_T00023198001	Probable inactive receptor kinase At3g08680	1.94601
Cc01_g08480	GSCOC_T00006217001	Aspartic ase nepenthesin-1	1.94499
Cc00_g22520	GSCOC_T00000523001	Probable indole-3-acetic acid-amido synthetase	1.94395
Cc11_g08120	GSCOC_T00032919001	PLANT CADMIUM RESISTANCE 2	1.9439
Cc00_g14920	GSCOC_T00001123001	Germin 1-2	1.94296
Cc03_g09490	GSCOC_T00030927001	Uncharacterized protein	1.94172
Cc10_g09170	GSCOC_T00034285001	Xanthotoxin 5-hydroxylase CYP82C2	1.93707
Cc08_g16900	GSCOC_T00035666001	NAC domain-containing 43	1.93646
Cc00_g08150	GSCOC_T00000289001	Cytochrome P450 98A2	1.93478
Cc01_g08580	GSCOC_T00023887001	syntaxin-24	1.93318
Cc09_g06090	GSCOC_T00033364001	LRR receptor-like serine threonine- kinase EFR	1.93315
Cc11_g06860	GSCOC_T00020717001	1-aminocyclopropane-1-carboxylate oxidase homolog 1	1.93266
Cc06_g03060	GSCOC_T00023577001	Kinesin KIN-5C	1.93266
Cc07_g06430	GSCOC_T00039948001	Microtubule-associated RP EB family member 3	1.9322
Cc07_g09570	GSCOC_T00037224001	GATA transcription factor 18	1.93212
Cc04_g07570	GSCOC_T00022586001	Uncharacterized protein	1.93178
Cc00_g26210	GSCOC_T00010475001	Uncharacterized protein	1.93147
Cc08_g03110	GSCOC_T00037821001	Anthocyanin regulatory C1	1.93107
Cc08_g02860	GSCOC_T00037785001	Uncharacterized protein	1.92981
Cc10_g16260	GSCOC_T00033843001	Probable fructokinase-5	1.92964
Cc05_g12390	GSCOC_T00021196001	Uncharacterized protein	1.92868
Cc03_g01980	GSCOC_T00025833001	Basic 7S globulin	1.92532
Cc08_g01530	GSCOC_T00038372001	Beta-amylase chloroplastic	1.92495
Cc08_g03520	GSCOC_T00034135001	Probable xyloglucan endotransglucosylase hydrolase 30	1.92488
Cc10_g04340	GSCOC_T00034946001	Uncharacterized protein	1.92233
Cc03_g09310	GSCOC_T00042686001	UDP-glycosyltransferase 75D1	1.91986
Cc08_g10670	GSCOC_T00027039001	Probable leucine-rich repeat receptor kinase At1g68400	1.91915
Cc03_g06970	GSCOC_T00026529001	Uncharacterized protein	1.91843
Cc11_g02400	GSCOC_T00032972001	Uncharacterized protein At5g23160	1.9179
Cc00_g17550	GSCOC_T00012275001	Peroxidase 3	1.91749
Cc03_g01950	GSCOC_T00025828001	Uncharacterized protein	1.91353
Cc06_g12130	GSCOC_T00041573001	Uncharacterized protein	1.91328
Cc04_g00960	GSCOC_T00021726001	ABC transporter B family member 19	1.91205
Cc02_g34630	GSCOC_T00000721001	Probable galacturonosyltransferase-like 6	1.91189
Cc02_g39350	GSCOC_T00027728001	Uncharacterized protein	1.91182
Cc01_g17930	GSCOC_T00016263001	Cellulose synthase A catalytic subunit	1.91109
Cc05_g12010	GSCOC_T00021244001	SPA1-RELATED 3	1.91067
Cc07_g09580	GSCOC_T00037223001	Uncharacterized protein Mb2734	1.90987
Cc07_g12220	GSCOC_T00036907001	3-hydroxy-3-methylglutaryl-coenzyme A reductase 1	1.9082
Cc09_g04130	GSCOC_T00017463001	Uncharacterized protein	1.90665
Cc08_g12970	GSCOC_T00030405001	NAC domain-containing 7	1.90634
Cc05_g09640	GSCOC_T00021558001	Probable receptor kinase At2g42960	1.90177
Cc01_g06330	GSCOC_T00030001001	Hydroxymethylglutaryl- mitochondrial	1.90171
Cc01_g15360	GSCOC_T00016571001	Trans-cinnamate 4-monooxygenase	1.90171
Cc05_g07120	GSCOC_T00042235001	Uncharacterized protein	1.90104
Cc08_g02900	GSCOC_T00037791001	Uncharacterized protein	1.90063
Cc04_g06360	GSCOC_T00022422001	Calcium-binding allergen Ole e 8	1.9004
Cc06_g03690	GSCOC_T00023658001	Uncharacterized protein	1.90012
Cc04_g04710	GSCOC_T00022204001	Uncharacterized protein	1.89873
Cc09_g01850	GSCOC_T00017755001	Abnormal spindle-like microcephaly-associated homolog	1.8977
Cc00_g12160	GSCOC_T00012514001	Caffeic acid 3-O-methyltransferase	1.8972
Cc10_g05830	GSCOC_T00034757001	Probable beta-D-xylosidase 5	1.89505
Cc07_g11860	GSCOC_T00036947001	Syntaxin-binding 5-like	1.89252
Cc02_g13480	GSCOC_T00029145001	Pistil-specific extensin	1.89169
Cc00_g25030	GSCOC_T00008820001	Cell division control 2 homolog C	1.88977
Cc11_g10650	GSCOC_T00032550001	Transcription factor AIG1	1.88889
Cc06_g18090	GSCOC_T00040413001	Glycerol-3-phosphate dehydrogenas	1.88878
Cc02_g06000	GSCOC_T00039123001	Uncharacterized protein	1.88872
Cc06_g07440	GSCOC_T00031260001	E3 ubiquitin- ligase RING1-like	1.88673
Cc05_g11640	GSCOC_T00021288001	UDP-glycosyltransferase 79B9	1.88574
Cc11_g14660	GSCOC_T00032028001	Uncharacterized protein	1.88269
Cc05_g13200	GSCOC_T00021094001	Probable galacturonosyltransferase 12	1.87783
Cc00_g35890	GSCOC_T00005696001	Polyphenol oxidase chloroplastic	1.87782
Cc02_g35660	GSCOC_T00042815001	S-adenosylmethionine synthase 5	1.87653
Cc09_g03890	GSCOC_T00017491001	chloroplastic	1.87407
Cc09_g07160	GSCOC_T00036307001	CASP 1B1	1.87353
Cc01_g03180	GSCOC_T00033153001	disease resistance RGA3	1.87343
Cc02_g17790	GSCOC_T00014307001	Polyol transporter 5	1.87327
Cc06_g09100	GSCOC_T00041959001	Uncharacterized protein	1.87314
Cc04_g09640	GSCOC_T00008123001	ASPARTIC PROTEASE IN GUARD CELL 1	1.87289
Cc02_g36950	GSCOC_T00003852001	Nectarin-1	1.87289
Cc05_g02500	GSCOC_T00020945001	GDSL esterase lipase At2g04570	1.87225
Cc03_g12430	GSCOC_T00015220001	GDSL esterase lipase 5	1.87098
Cc06_g07260	GSCOC_T00031286001	Annexin A3	1.87085
Cc02_g00420	GSCOC_T00019819001	Anaphase-promoting complex subunit cdc20	1.87002
Cc05_g09720	GSCOC_T00021547001	Uncharacterized protein	1.86982
Cc02_g26030	GSCOC_T00028664001	Ent-kaurenoic acid oxidase 1	1.86909
Cc11_g03080	GSCOC_T00025473001	UDP-glycosyltransferase 76E1	1.86887
Cc05_g04810	GSCOC_T00035017001	Uncharacterized protein	1.86885
Cc08_g17120	GSCOC_T00035698001	Probable aquaporin NIP5-1	1.86846
Cc10_g10160	GSCOC_T00031448001	Dammarenediol II synthase	1.86598
Cc09_g09900	GSCOC_T00041120001	SRG1	1.86378
Cc07_g03240	GSCOC_T00039545001	Transcription factor PRE3	1.86356
Cc05_g03510	GSCOC_T00033574001	Cysteine-rich receptor kinase 6	1.86246
Cc11_g11950	GSCOC_T00032378001	Uncharacterized protein	1.86205
Cc05_g03500	GSCOC_T00033572001	ASPARTIC PROTEASE IN GUARD CELL 1	1.86091
Cc05_g16580	GSCOC_T00038542001	Uncharacterized protein	1.86088
Cc01_g18920	GSCOC_T00016132001	Uncharacterized protein	1.8608
Cc06_g08580	GSCOC_T00031111001	NRT1 PTR FAMILY	1.86016
Cc10_g13350	GSCOC_T00035308001	Uncharacterized protein	1.85947
Cc03_g04020	GSCOC_T00026105001	Non-specific lipid-transfer At5g64080	1.85832
Cc06_g01320	GSCOC_T00023347001	Phosphoinositide phospholipase C 2	1.85804
Cc10_g03490	GSCOC_T00024874001	Type IV inositol polyphosphate 5-phosphatase 11	1.85775
Cc05_g04680	GSCOC_T00007009001	L-ascorbate oxidase homolog	1.85689
Cc03_g02240	GSCOC_T00025862001	Uncharacterized protein	1.85658
Cc11_g04910	GSCOC_T00042937001	Probable pectinesterase pectinesterase inhibitor 40	1.85651
Cc09_g07910	GSCOC_T00003777001	Monoglyceride lipase	1.85579
Cc02_g36000	GSCOC_T00042762001	Transcription factor MYB86	1.8544
Cc07_g15400	GSCOC_T00036480001	Uncharacterized protein	1.8531
Cc02_g14590	GSCOC_T00013872001	GDSL esterase lipase At5g45910	1.85053
Cc10_g01820	GSCOC_T00024670001	Endoglucanase 2	1.84916
Cc10_g03410	GSCOC_T00024865001	Probable galacturonosyltransferase-like 1	1.84827
Cc05_g07620	GSCOC_T00016757001	Reticulon B17	1.84741
Cc02_g16180	GSCOC_T00014095001	GDSL esterase lipase At1g29670	1.84531
Cc04_g16480	GSCOC_T00035750001	Probable calcium-binding CML46	1.84337
Cc00_g29940	GSCOC_T00006232001	Beta-galactosidase	1.84331
Cc02_g35230	GSCOC_T00042879001	Probable glycerol-3-phosphate acyltransferase 2	1.84275
Cc10_g02450	GSCOC_T00024747001	Transmembrane 136	1.84033
Cc09_g10530	GSCOC_T00041034001	Expansin-like A1	1.83998
Cc09_g07180	GSCOC_T00036304001	Reticuline oxidase	1.83864
Cc05_g12750	GSCOC_T00021150001	Uncharacterized protein	1.83753
Cc05_g11990	GSCOC_T00021246001	Xylosyltransferase 2	1.83639
Cc06_g16590	GSCOC_T00030665001	Lipase	1.8361
Cc01_g08690	GSCOC_T00023901001	Momilactone A synthase	1.83519
Cc07_g15190	GSCOC_T00036507001	BTB POZ domain-containing DOT3	1.83517
Cc02_g05670	GSCOC_T00039081001	Uncharacterized protein	1.83356
Cc06_g04330	GSCOC_T00023748001	S-adenosylmethionine synthase 3	1.82888
Cc08_g09200	GSCOC_T00017263001	L-gulonolactone oxidase	1.82734
Cc03_g04030	GSCOC_T00026107001	Non-specific lipid transfer -like 1	1.82727
Cc00_g21850	GSCOC_T00013635001	UDP-glycosyltransferase 83A1	1.8271
Cc08_g16730	GSCOC_T00035644001	Uncharacterized protein	1.82705
Cc10_g06860	GSCOC_T00034603001	Uncharacterized protein	1.82658
Cc00_g29740	GSCOC_T00013761001	Auxin-induced 6B	1.82571
Cc04_g03820	GSCOC_T00022090001	Monoglyceride lipase	1.82403
Cc11_g16830	GSCOC_T00038230001	65-kDa microtubule-associated 8	1.82398
Cc03_g01220	GSCOC_T00025728001	COBRA 7	1.82373
Cc06_g05120	GSCOC_T00043045001	Glucomannan 4-beta-mannosyltransferase 9	1.8216
Cc00_g21750	GSCOC_T00006765001	DETOXIFICATION 6	1.82136
Cc07_g14080	GSCOC_T00036658001	Uncharacterized protein	1.82078
Cc07_g06260	GSCOC_T00039925001	Uncharacterized protein	1.8207
Cc01_g03290	GSCOC_T00033134001	Uncharacterized protein	1.82053
Cc11_g12460	GSCOC_T00032314001	Mitotic checkpoint BUB3	1.82036
Cc07_g06440	GSCOC_T00039949001	Probable LRR receptor-like serine threonine- kinase At4g37250	1.81999
Cc09_g10560	GSCOC_T00041031001	NAC domain-containing 94	1.81953
Cc03_g09690	GSCOC_T00030955001	dCTP pyrophosphatase 1	1.817
Cc09_g04350	GSCOC_T00017438001	L-ascorbate oxidase homolog	1.81695
Cc04_g16160	GSCOC_T00042408001	TORTIFOLIA1 1	1.81502
Cc03_g07690	GSCOC_T00026629001	Uncharacterized protein	1.81406
Cc05_g07770	GSCOC_T00016779001	SUPPRESSOR OF GAMMA RESPONSE 1	1.81127
Cc05_g02420	GSCOC_T00020978001	Fasciclin-like arabinogalactan 9	1.80737
Cc02_g24570	GSCOC_T00028867001	Uncharacterized protein	1.80696
Cc02_g25660	GSCOC_T00028720001	Probable Golgi transport 1	1.80619
Cc07_g12880	GSCOC_T00036820001	B3 domain-containing REM15	1.80568
Cc05_g05870	GSCOC_T00035174001	Transcription factor MYB4	1.8045
Cc03_g08480	GSCOC_T00033269001	Serine hydroxymethyltransferase 2	1.80258
Cc04_g03210	GSCOC_T00022014001	Pentatricopeptide repeat-containing mitochondrial	1.80251
Cc04_g01990	GSCOC_T00021864001	Beta-galactosidase	1.80214
Cc11_g17170	GSCOC_T00038276001	Probable WRKY transcription factor 75	1.79982
Cc06_g09370	GSCOC_T00041924001	Sigma factor regulation	1.79771
Cc08_g00450	GSCOC_T00038520001	Bifunctional uridylyltransferase uridylyl-removing enzyme	1.79671
Cc01_g16150	GSCOC_T00016475001	lipid-transfer DIR1	1.79639
Cc02_g18020	GSCOC_T00014335001	Plastid division PDV2	1.7961
Cc08_g00730	GSCOC_T00038475001	Phospholipase D alpha 1	1.79382
Cc04_g00870	GSCOC_T00021714001	GDSL esterase lipase 1	1.79361
Cc07_g06180	GSCOC_T00039914001	Filament-like plant 7	1.79221
Cc09_g02150	GSCOC_T00017712001	Monoglyceride lipase	1.79191
Cc06_g13370	GSCOC_T00041408001	4-coumarate-- ligase 2	1.79185
Cc09_g04820	GSCOC_T00017376001	Apyrase	1.79097
Cc03_g08410	GSCOC_T00033258001	Omega-hydroxypalmitate O-feruloyl transferase	1.79022
Cc07_g07020	GSCOC_T00040035001	Condensin-2 complex subunit G2	1.78909
Cc02_g24030	GSCOC_T00015112001	UDP-glucuronate 4-epimerase 3	1.78894
Cc08_g10500	GSCOC_T00027018001	Transcription factor MYB1R1	1.7873
Cc01_g08900	GSCOC_T00023928001	NAC domain-containing 90	1.78654
Cc11_g04900	GSCOC_T00042936001	Probable pectinesterase pectinesterase inhibitor 40	1.78636
Cc00_g10050	GSCOC_T00003814001	Trans-cinnamate 4-monooxygenase	1.78597
Cc01_g14960	GSCOC_T00016621001	F-box LRR-repeat 3	1.78567
Cc00_g06220	GSCOC_T00010066001	Uncharacterized protein	1.78424
Cc05_g07830	GSCOC_T00016787001	Fasciclin-like arabinogalactan 6	1.78341
Cc04_g00330	GSCOC_T00021637001	Calcium-transporting ATPase plasma membrane-type	1.78301
Cc05_g10250	GSCOC_T00021480001	Polyphenol chloroplastic	1.78281
Cc01_g10800	GSCOC_T00024187001	Uncharacterized protein	1.782
Cc01_g13400	GSCOC_T00028306001	Probable phosphatase 2C 24	1.78185
Cc06_g03830	GSCOC_T00023679001	Fasciclin-like arabinogalactan 11	1.78112
Cc07_g02770	GSCOC_T00039483001	Probable galacturonosyltransferase-like 10	1.78104
Cc01_g13620	GSCOC_T00028335001	Uncharacterized protein	1.78018
Cc02_g02520	GSCOC_T00020108001	Uncharacterized protein	1.77886
Cc11_g17080	GSCOC_T00038264001	Uncharacterized protein	1.77756
Cc11_g10250	GSCOC_T00032601001	NRT1 PTR FAMILY	1.7774
Cc11_g17410	GSCOC_T00038308001	NAC transcription factor 29	1.77724
Cc08_g05740	GSCOC_T00024363001	Chitinase 2	1.77624
Cc08_g08980	GSCOC_T00017236001	UDP-glucose flavonoid 3-O-glucosyltransferase 3	1.77573
Cc06_g02260	GSCOC_T00023477001	Probable E3 ubiquitin- ligase HERC1	1.7739
Cc09_g08980	GSCOC_T00023128001	Uncharacterized protein	1.77311
Cc05_g04990	GSCOC_T00035045001	Peroxidase 3	1.77144
Cc00_g11510	GSCOC_T00012349001	Uncharacterized protein	1.7709
Cc10_g00330	GSCOC_T00024481001	Uncharacterized protein	1.76997
Cc07_g13110	GSCOC_T00036787001	Ethylene-responsive transcription factor 1B	1.76941
Cc10_g07820	GSCOC_T00034476001	Branched-chain-amino-acid aminotransferase chloroplastic	1.7678
Cc04_g00690	GSCOC_T00021692001	Pectinesterase 3	1.76746
Cc02_g15480	GSCOC_T00013996001	Cellulose synthase A catalytic subunit	1.7673
Cc02_g32290	GSCOC_T00012964001	Uncharacterized protein	1.7669
Cc08_g09400	GSCOC_T00017295001	Aquaporin TIP4-1	1.76685
Cc02_g00760	GSCOC_T00019870001	Caffeic acid 3-O-methyltransferase	1.76507
Cc09_g01700	GSCOC_T00017774001	Peroxidase 42	1.7641
Cc08_g11350	GSCOC_T00027136001	Uncharacterized protein	1.76343
Cc08_g13110	GSCOC_T00030383001	ODORANT1	1.76184
Cc07_g15440	GSCOC_T00036476001	Annexin D2	1.76062
Cc03_g14210	GSCOC_T00031815001	Basic endochitinase	1.76039
Cc11_g06530	GSCOC_T00020670001	Uncharacterized protein	1.75978
Cc02_g28170	GSCOC_T00025184001	DNA topoisomerase 2	1.75956
Cc02_g18080	GSCOC_T00014341001	CASP 5C2	1.75697
Cc06_g00140	GSCOC_T00023181001	Calcium-binding CAST	1.7563
Cc05_g04010	GSCOC_T00031576001	Premnaspirodiene oxygenase	1.75616
Cc06_g00490	GSCOC_T00023228001	Probable serine threonine- kinase WNK5	1.75572
Cc10_g04910	GSCOC_T00034877001	Probable carbohydrate esterase At4g34215	1.75514
Cc00_g16710	GSCOC_T00011926001	O-fucosyltransferase 1	1.75465
Cc00_g07510	GSCOC_T00000516001	DETOXIFICATION 41	1.75408
Cc02_g36510	GSCOC_T00003915001	Fasciclin-like arabinogalactan 8	1.7536
Cc02_g35040	GSCOC_T00011816001	Nicotianamine synthase	1.75357
Cc08_g07600	GSCOC_T00025394001	Transcription factor NAI1	1.75345
Cc02_g36780	GSCOC_T00003879001	Endoglucanase 25	1.75313
Cc08_g07720	GSCOC_T00011859001	Uncharacterized protein	1.75193
Cc11_g16080	GSCOC_T00038139001	Uncharacterized protein	1.7511
Cc11_g13780	GSCOC_T00032138001	Exocyst complex component 8	1.75096
Cc02_g19800	GSCOC_T00014555001	Uncharacterized protein	1.75078
Cc06_g06000	GSCOC_T00043170001	Rho GTPase-activating gacA	1.74981
Cc05_g09230	GSCOC_T00002657001	HVA22 f	1.74903
Cc07_g10690	GSCOC_T00037085001	WEB family At2g17940	1.7489
Cc02_g24440	GSCOC_T00028885001	SPX domain-containing 3	1.74833
Cc11_g10950	GSCOC_T00032505001	Uncharacterized protein	1.74624
Cc07_g10520	GSCOC_T00037105001	NAC domain-containing 7	1.74539
Cc09_g07590	GSCOC_T00036235001	Cytochrome P450 734A1	1.74268
Cc01_g07220	GSCOC_T00030150001	Uncharacterized protein	1.74055
Cc03_g14440	GSCOC_T00026661001	Uncharacterized protein	1.73951
Cc00_g25920	GSCOC_T00006245001	Uncharacterized protein	1.73915
Cc02_g35650	GSCOC_T00042816001	Uncharacterized protein	1.73687
Cc06_g01670	GSCOC_T00023397001	Probable anion transporter chloroplastic	1.73588
Cc02_g37000	GSCOC_T00028048001	MADS-box SOC1	1.73391
Cc09_g04210	GSCOC_T00017454001	Uncharacterized protein	1.7329
Cc03_g04550	GSCOC_T00026178001	3-ketoacyl- synthase 2	1.73219
Cc06_g14110	GSCOC_T00041300001	Uncharacterized protein	1.7317
Cc01_g14620	GSCOC_T00028468001	Inactive receptor-like serine threonine- kinase At2g40270	1.73162
Cc00_g24100	GSCOC_T00001080001	GDSL esterase lipase At1g28580	1.73121
Cc00_g27010	GSCOC_T00011934001	UDP-glucuronate 4-epimerase 1	1.73046
Cc00_g13810	GSCOC_T00007198001	Acyl- --sterol O-acyltransferase 1	1.73015
Cc01_g15340	GSCOC_T00016575001	Two-component response regulator ARR17	1.72877
Cc08_g12830	GSCOC_T00030424001	Uncharacterized protein	1.72813
Cc03_g07850	GSCOC_T00033160001	Ankyrin-2	1.72766
Cc11_g14550	GSCOC_T00032044001	Aldehyde dehydrogenase family 2 member mitochondrial	1.72751
Cc06_g07880	GSCOC_T00031201001	Defensin P322	1.72747
Cc04_g09590	GSCOC_T00022851001	Omega-hydroxypalmitate O-feruloyl transferase	1.72725
Cc05_g11470	GSCOC_T00021311001	Probable calcium-binding CML10	1.72567
Cc03_g09650	GSCOC_T00030951001	Auxin-induced in root cultures 12	1.72557
Cc00_g25640	GSCOC_T00006098001	Uncharacterized protein	1.72518
Cc10_g04410	GSCOC_T00034938001	Patatin-11	1.72429
Cc10_g15100	GSCOC_T00033677001	Ethylene-responsive transcription factor ABR1	1.72384
Cc07_g06680	GSCOC_T00039985001	Uncharacterized protein	1.72283
Cc02_g15210	GSCOC_T00013962001	O-fucosyltransferase 1	1.72139
Cc03_g08810	GSCOC_T00033320001	Auxilin-related 2	1.72131
Cc01_g09780	GSCOC_T00024045001	Arogenate dehydratase chloroplastic	1.72071
Cc00_g18570	GSCOC_T00011332001	Serine carboxypeptidase-like 35	1.72061
Cc10_g01580	GSCOC_T00024638001	Chaperone dnaJ chloroplastic	1.72059
Cc04_g11660	GSCOC_T00037368001	Aldehyde dehydrogenase family 2 member C4	1.72031
Cc05_g01470	GSCOC_T00018227001	60S acidic ribosomal P0	1.71973
Cc06_g14920	GSCOC_T00030903001	Gibberellin 2-beta-dioxygenase 8	1.71787
Cc02_g11660	GSCOC_T00029384001	Probable xyloglucan endotransglucosylase hydrolase 8	1.71598
Cc01_g01020	GSCOC_T00037998001	DNA (cytosine-5)-methyltransferase 1	1.71492
Cc00_g10320	GSCOC_T00008233001	ASPARTIC PROTEASE IN GUARD CELL 1	1.71484
Cc09_g02130	GSCOC_T00017715001	Monoglyceride lipase	1.7135
Cc02_g03350	GSCOC_T00020216001	F-box PP2-A13	1.71327
Cc00_g13800	GSCOC_T00013305001	Glucan endo-	1.71246
Cc02_g12440	GSCOC_T00029283001	F-box At1g61340	1.71072
Cc03_g05150	GSCOC_T00026260001	Uncharacterized protein	1.71012
Cc10_g06820	GSCOC_T00034607001	Phospho-2-dehydro-3-deoxyheptonate aldolase chloroplastic	1.70919
Cc03_g12870	GSCOC_T00030645001	Calmodulin 3	1.70912
Cc07_g08950	GSCOC_T00040287001	GDT1 4	1.7089
Cc09_g00760	GSCOC_T00017907001	Auxin-induced in root cultures 12	1.70845
Cc01_g15810	GSCOC_T00016515001	Flavonol 7-O-beta-glucosyltransferase UGT74F1	1.70781
Cc02_g24810	GSCOC_T00028837001	Ethylene-responsive transcription factor ERF034	1.70761
Cc02_g36170	GSCOC_T00006322001	E3 ubiquitin- ligase RING1	1.70709
Cc02_g31600	GSCOC_T00027528001	Polyubiquitin-A	1.70573
Cc06_g09970	GSCOC_T00041846001	Rac-like GTP-binding ARAC7	1.70429
Cc05_g16210	GSCOC_T00038591001	LOB domain-containing 12	1.70399
Cc02_g39990	GSCOC_T00027631001	LHY	1.7027
Cc10_g04430	GSCOC_T00034935001	Patatin group A-3	1.70245
Cc00_g06690	GSCOC_T00007496001	Dihydroflavonol 4-reductase	1.70107
Cc06_g06970	GSCOC_T00031319001	Calcium-dependent kinase 20	1.70064
Cc00_g06060	GSCOC_T00000135001	Beta-glucosidase 11	1.69988
Cc04_g06970	GSCOC_T00022498001	Uncharacterized protein	1.69964
Cc05_g12500	GSCOC_T00021185001	NAC domain-containing 72	1.69837
Cc07_g10340	GSCOC_T00037129001	MDIS1-interacting receptor like kinase 2	1.69773
Cc09_g03630	GSCOC_T00017522001	MADS-box transcription factor 3	1.69722
Cc04_g02120	GSCOC_T00021880001	Inorganic pyrophosphatase 2	1.69722
Cc11_g04780	GSCOC_T00042910001	Indole-3-acetic acid-induced ARG7	1.69692
Cc05_g05520	GSCOC_T00035121001	Uncharacterized protein	1.69346
Cc10_g09050	GSCOC_T00034304001	IQ-DOMAIN 14	1.69277
Cc02_g39080	GSCOC_T00027767001	Uncharacterized protein	1.69023
Cc02_g06210	GSCOC_T00039146001	LATERAL ORGAN BOUNDARIES	1.69001
Cc02_g06950	GSCOC_T00039249001	Laccase-4	1.68907
Cc04_g10480	GSCOC_T00042600001	Adenine guanine permease AZG2	1.68877
Cc02_g19990	GSCOC_T00014579001	Uncharacterized protein	1.68838
Cc07_g15430	GSCOC_T00036477001	Epidermis-specific secreted glyco EP1	1.68746
Cc07_g11540	GSCOC_T00036990001	Uncharacterized protein	1.68732
Cc08_g10800	GSCOC_T00027059001	Glutaredoxin-C6	1.68727
Cc06_g08330	GSCOC_T00031146001	Equilibrative nucleoside transporter 3	1.68598
Cc02_g20030	GSCOC_T00014604001	Phytosulfokines 3	1.68401
Cc02_g20420	GSCOC_T00014655001	Transcription factor bHLH18	1.68158
Cc07_g12710	GSCOC_T00036841001	Benzoate-- peroxisomal	1.68154
Cc07_g01090	GSCOC_T00019194001	Glycerophosphocholine phosphodiesterase GDE1	1.68098
Cc05_g13670	GSCOC_T00021032001	NEP1-interacting 1	1.68069
Cc05_g00010	GSCOC_T00017008001	SCARECROW	1.68041
Cc10_g07060	GSCOC_T00034574001	RNA-binding 24	1.67876
Cc06_g07310	GSCOC_T00031280001	5-methyltetrahydropteroyltriglutamate--homocysteine methyltransferase	1.67667
Cc02_g07610	GSCOC_T00029914001	Uncharacterized protein	1.67652
Cc00_g28340	GSCOC_T00010408001	UDP-glycosyltransferase 75C1	1.67639
Cc01_g07330	GSCOC_T00030167001	G2 mitotic-specific cyclin-1	1.67589
Cc02_g26520	GSCOC_T00024949001	PHLOEM PROTEIN 2-LIKE A1	1.67429
Cc11_g03390	GSCOC_T00025420001	Isoflavone reductase homolog	1.67386
Cc08_g09250	GSCOC_T00017270001	Bark storage A	1.67274
Cc08_g00220	GSCOC_T00005578001	Uncharacterized protein	1.67086
Cc02_g35350	GSCOC_T00042862001	Uncharacterized protein R707	1.6701
Cc07_g08530	GSCOC_T00040230001	PLASTID MOVEMENT IMPAIRED 2	1.66948
Cc06_g17940	GSCOC_T00040388001	UDP-URONIC ACID TRANSPORTER 1	1.66868
Cc10_g14710	GSCOC_T00033616001	Histone	1.66829
Cc01_g05870	GSCOC_T00027414001	Xyloglucan glycosyltransferase 4	1.66787
Cc01_g17390	GSCOC_T00016329001	Uncharacterized protein	1.66721
Cc11_g02430	GSCOC_T00032968001	Cytochrome P450 86B1	1.66612
Cc02_g19270	GSCOC_T00014491001	Cinnamyl alcohol dehydrogenase 1	1.66597
Cc01_g09140	GSCOC_T00023958001	Serine carboxypeptidase-like 2	1.66539
Cc02_g04880	GSCOC_T00020418001	Cyclin-U4-1	1.66504
Cc06_g04430	GSCOC_T00042952001	Uncharacterized protein	1.66487
Cc04_g02840	GSCOC_T00021966001	Aquaporin TIP2-1	1.66386
Cc06_g13220	GSCOC_T00041427001	NADPH--cytochrome P450 reductase	1.66278
Cc02_g39450	GSCOC_T00027714001	ASPARTIC PROTEASE IN GUARD CELL 1	1.66265
Cc04_g09080	GSCOC_T00022785001	Transcription factor MYB44	1.6622
Cc08_g09670	GSCOC_T00026913001	Mitogen-activated kinase kinase kinase 1	1.66198
Cc07_g07030	GSCOC_T00040036001	Calcium-transporting ATPase plasma membrane-type	1.66039
Cc03_g11110	GSCOC_T00042068001	Pistil-specific extensin	1.66015
Cc00_g02720	GSCOC_T00006664001	Cucumisin	1.65702
Cc02_g26830	GSCOC_T00024988001	Non-specific lipid transfer GPI-anchored 1	1.65462
Cc07_g18060	GSCOC_T00018808001	UDP-glucuronate:xylan alpha-glucuronosyltransferase 1	1.65413
Cc08_g15400	GSCOC_T00035469001	Uncharacterized protein	1.65224
Cc08_g01050	GSCOC_T00038435001	Uncharacterized protein	1.6508
Cc01_g15760	GSCOC_T00016523001	isoforms D E	1.65078
Cc02_g35720	GSCOC_T00042803001	Pleiotropic drug resistance 3	1.64991
Cc09_g09170	GSCOC_T00023089001	N-acetylneuraminate 9-O-acetyltransferase	1.64828
Cc02_g00580	GSCOC_T00019842001	Uncharacterized protein	1.64811
Cc00_g22350	GSCOC_T00000296001	Uncharacterized protein	1.64769
Cc09_g07450	GSCOC_T00036255001	Reticuline oxidase	1.64689
Cc00_g06510	GSCOC_T00005825001	Xyloglucan endotransglucosylase hydrolase 15	1.64663
Cc08_g03560	GSCOC_T00034140001	Disease resistance response 206	1.64607
Cc05_g11000	GSCOC_T00021370001	Pathogen-related	1.64576
Cc01_g04780	GSCOC_T00028526001	Phospholipase A1- chloroplastic	1.64475
Cc01_g17250	GSCOC_T00016348001	Uncharacterized protein	1.64269
Cc09_g09180	GSCOC_T00023088001	N-acetylneuraminate 9-O-acetyltransferase	1.64174
Cc04_g02590	GSCOC_T00021932001	NADP-dependent malic chloroplastic	1.64163
Cc06_g08450	GSCOC_T00031130001	SPX domain-containing 2	1.64064
Cc06_g22980	GSCOC_T00040642001	Uncharacterized protein	1.64057
Cc09_g09690	GSCOC_T00004097001	Probable tocopherol O- chloroplastic	1.64038
Cc01_g11110	GSCOC_T00024229001	Aquaporin PIP2-2	1.64034
Cc07_g17800	GSCOC_T00018845001	U-box domain-containing 27	1.63886
Cc04_g10310	GSCOC_T00042577001	Non-hemolytic phospholipase C	1.63829
Cc04_g02630	GSCOC_T00021938001	Flavonol synthase flavanone 3-hydroxylase	1.6369
Cc06_g14690	GSCOC_T00041223001	Cellulose synthase A catalytic subunit	1.63678
Cc06_g08410	GSCOC_T00031135001	Uncharacterized protein	1.63674
Cc07_g07230	GSCOC_T00040063001	Galactomannan galactosyltransferase 1	1.63566
Cc07_g01610	GSCOC_T00039335001	U-box domain-containing 7	1.63561
Cc05_g02480	GSCOC_T00020948001	GDSL esterase lipase At2g42990	1.63524
Cc10_g00870	GSCOC_T00024547001	Dehydrin ERD10	1.63297
Cc07_g03990	GSCOC_T00039649001	UDP-glucose 6-dehydrogenase 1	1.63137
Cc09_g00350	GSCOC_T00017960001	Uncharacterized protein	1.63091
Cc00_g22640	GSCOC_T00008883001	Auxin-induced 15A	1.63037
Cc04_g06310	GSCOC_T00022417001	Uncharacterized protein	1.62693
Cc05_g15490	GSCOC_T00038686001	Uncharacterized protein	1.62403
Cc03_g04960	GSCOC_T00026227001	Syntaxin-related KNOLLE	1.62323
Cc08_g04710	GSCOC_T00042505001	Ubiquitin carboxyl-terminal hydrolase 12	1.62201
Cc09_g00620	GSCOC_T00017924001	Glucan endo-	1.6209
Cc01_g15190	GSCOC_T00016594001	EPIDERMAL PATTERNING FACTOR 6	1.6184
Cc09_g00890	GSCOC_T00017886001	Acyl- --sterol O-acyltransferase 1	1.61765
Cc07_g14850	GSCOC_T00036561001	F-box FBW2	1.61728
Cc02_g04030	GSCOC_T00020306001	Uncharacterized protein	1.61569
Cc11_g11470	GSCOC_T00032442001	DNA-3-methyladenine glycosylase	1.61568
Cc02_g05420	GSCOC_T00039050001	Expansin-A4	1.61427
Cc11_g09750	GSCOC_T00032676001	LEAF RUST 10 DISEASE-RESISTANCE LOCUS RECEPTOR-LIKE PROTEIN KINASE-like	1.61383
Cc01_g10520	GSCOC_T00024150001	Heavy metal-associated isoprenylated plant 26	1.61354
Cc02_g23840	GSCOC_T00015088001	Uncharacterized protein	1.61319
Cc11_g03130	GSCOC_T00025463001	UDP-glycosyltransferase 76E2	1.61248
Cc03_g03650	GSCOC_T00026060001	Primary amine oxidase	1.61239
Cc05_g10650	GSCOC_T00021413001	Bidirectional sugar transporter SWEET2	1.61229
Cc01_g09750	GSCOC_T00024041001	Uncharacterized protein	1.61194
Cc02_g23010	GSCOC_T00014980001	WEB family At1g75720	1.61188
Cc07_g19660	GSCOC_T00018531001	Isoflavone 2 -hydroxylase	1.61045
Cc07_g07210	GSCOC_T00040059001	glycosyltransferase 7	1.61021
Cc05_g07810	GSCOC_T00016784001	Glutaredoxin-C9	1.61018
Cc06_g04970	GSCOC_T00043025001	Uncharacterized protein	1.60919
Cc00_g22120	GSCOC_T00009092001	MLP 43	1.60839
Cc08_g12160	GSCOC_T00030518001	Dehydration-responsive element-binding 3	1.60717
Cc06_g01870	GSCOC_T00023424001	Uncharacterized protein	1.60706
Cc10_g13710	GSCOC_T00035247001	Proline-rich receptor kinase PERK13	1.6067
Cc09_g00590	GSCOC_T00017928001	Uncharacterized protein	1.60594
Cc02_g25400	GSCOC_T00028750001	Rac-like GTP-binding ARAC3	1.60571
Cc04_g02710	GSCOC_T00021949001	CASP 3A1	1.60466
Cc05_g15470	GSCOC_T00038688001	BTB POZ domain-containing At1g55760	1.60416
Cc02_g18150	GSCOC_T00014351001	Myosin heavy chain kinase B	1.60253
Cc08_g16700	GSCOC_T00035641001	Metal-nicotianamine transporter YSL3	1.59998
Cc11_g14690	GSCOC_T00032023001	Polygalacturonase-1 non-catalytic subunit beta	1.59991
Cc00_g32830	GSCOC_T00007840001	LRR receptor-like serine threonine- kinase GSO2	1.59982
Cc09_g02050	GSCOC_T00017727001	Patatin group A-3	1.59629
Cc03_g04670	GSCOC_T00026194001	Auxin-responsive IAA7	1.5962
Cc11_g10400	GSCOC_T00032583001	Probable carboxylesterase 17	1.59608
Cc05_g10660	GSCOC_T00021411001	Trifunctional UDP-glucose	1.59601
Cc03_g09000	GSCOC_T00042731001	Glycine-rich	1.59582
Cc01_g16990	GSCOC_T00016376001	Probable LRR receptor-like serine threonine- kinase At5g48740	1.59578
Cc01_g00380	GSCOC_T00013680001	Benzyl alcohol O-benzoyltransferase	1.59436
Cc07_g07780	GSCOC_T00040138001	Auxin-responsive IAA9	1.59416
Cc02_g39970	GSCOC_T00027635001	NDR1	1.59335
Cc00_g31160	GSCOC_T00012545001	Shikimate O-hydroxycinnamoyltransferase	1.59142
Cc02_g31520	GSCOC_T00027544001	Polyubiquitin 3	1.59071
Cc06_g09680	GSCOC_T00041883001	Uncharacterized protein	1.58941
Cc04_g00680	GSCOC_T00021691001	Pectinesterase pectinesterase inhibitor U1	1.58875
Cc02_g19720	GSCOC_T00014546001	LOB domain-containing 39	1.58733
Cc04_g15100	GSCOC_T00002593001	Galactoside 2-alpha-L-fucosyltransferase	1.58641
Cc10_g12250	GSCOC_T00031923001	Beta-galactosidase 16	1.58631
Cc01_g08550	GSCOC_T00023883001	Serine threonine- kinase Nek5	1.58512
Cc03_g00230	GSCOC_T00025601001	S-adenosylmethionine synthase 2	1.5849
Cc00_g06600	GSCOC_T00005838001	Uncharacterized protein	1.58442
Cc02_g12690	GSCOC_T00029250001	Uncharacterized protein	1.58414
Cc09_g00530	GSCOC_T00017935001	Uncharacterized protein	1.58341
Cc02_g26770	GSCOC_T00024980001	Uncharacterized protein	1.5833
Cc07_g12310	GSCOC_T00036890001	Diacylglycerol O-acyltransferase 2	1.5829
Cc05_g06730	GSCOC_T00042182001	Uncharacterized protein	1.58195
Cc04_g09400	GSCOC_T00022827001	Phosphate carrier mitochondrial	1.58173
Cc08_g14420	GSCOC_T00030224001	Uncharacterized protein	1.58156
Cc03_g03470	GSCOC_T00026033001	Uncharacterized protein	1.58152
Cc02_g34570	GSCOC_T00000714001	Kinesin KIN-14G	1.58105
Cc05_g13160	GSCOC_T00021099001	Kinesin KIN-14N	1.58081
Cc03_g03600	GSCOC_T00026053001	Uncharacterized protein C24B11.05	1.57831
Cc02_g03670	GSCOC_T00020259001	Transcription factor bHLH120	1.57635
Cc01_g20830	GSCOC_T00005053001	UDP-glucuronic acid decarboxylase 1	1.57624
Cc06_g03330	GSCOC_T00023614001	Uncharacterized protein	1.57585
Cc08_g16960	GSCOC_T00035674001	Glucan endo-	1.57575
Cc03_g04880	GSCOC_T00026219001	Uncharacterized protein	1.57573
Cc02_g03890	GSCOC_T00020290001	65-kDa microtubule-associated 3	1.57493
Cc09_g08420	GSCOC_T00020801001	ABC transporter G family member 23	1.57466
Cc03_g09660	GSCOC_T00030952001	Ras-related RABA5c	1.57399
Cc10_g07370	GSCOC_T00034532001	TPR repeat-containing thioredoxin TTL1	1.57392
Cc02_g35750	GSCOC_T00042800001	Probable receptor kinase At5g18500	1.57369
Cc05_g11440	GSCOC_T00021315001	IQ-DOMAIN 14	1.57328
Cc11_g09100	GSCOC_T00032782001	Uncharacterized protein	1.57232
Cc07_g12730	GSCOC_T00036838001	Sucrose synthase 2	1.57121
Cc06_g15730	GSCOC_T00030781001	Uncharacterized protein	1.57071
Cc07_g05670	GSCOC_T00039845001	L-ascorbate oxidase homolog	1.57029
Cc10_g01730	GSCOC_T00024659001	WEB family At1g75720	1.57005
Cc06_g06460	GSCOC_T00031380001	Uncharacterized protein At1g08160	1.56971
Cc00_g21090	GSCOC_T00012626001	Uncharacterized protein	1.56966
Cc02_g26700	GSCOC_T00024972001	Non-specific lipid-transfer 4	1.56918
Cc04_g09490	GSCOC_T00022838001	Uncharacterized protein	1.56909
Cc10_g15150	GSCOC_T00033683001	Peroxidase 12	1.56845
Cc07_g07190	GSCOC_T00040057001	Uncharacterized protein	1.56812
Cc07_g17640	GSCOC_T00018871001	G-type lectin S-receptor-like serine threonine- kinase RLK1	1.56714
Cc06_g15190	GSCOC_T00030867001	NADP-dependent glyceraldehyde-3-phosphate dehydrogenase	1.5671
Cc03_g06000	GSCOC_T00026375001	Uncharacterized protein	1.56643
Cc06_g07710	GSCOC_T00031225001	Heparanase 3	1.56561
Cc02_g04420	GSCOC_T00020354001	Leucine-rich repeat receptor kinase TDR	1.56493
Cc04_g08870	GSCOC_T00022762001	Sucrose synthase 2	1.56403
Cc05_g07000	GSCOC_T00042219001	Ankyrin repeat-containing At5g02620	1.56353
Cc06_g09650	GSCOC_T00041886001	Kinesin-related 6	1.563
Cc03_g07330	GSCOC_T00026580001	Jasmonate O-methyltransferase	1.56227
Cc01_g20810	GSCOC_T00005056001	Uncharacterized protein	1.56072
Cc02_g20240	GSCOC_T00014630001	Agamous-like MADS-box AGL62	1.56064
Cc10_g13230	GSCOC_T00035324001	F-box SKP2A	1.56024
Cc03_g03370	GSCOC_T00026021001	FANTASTIC FOUR 3	1.55986
Cc05_g14940	GSCOC_T00038756001	Fasciclin-like arabinogalactan 1	1.55914
Cc10_g14500	GSCOC_T00033583001	Uncharacterized protein	1.55629
Cc08_g03500	GSCOC_T00034131001	Alpha beta hydrolase domain-containing 17B	1.55622
Cc10_g05790	GSCOC_T00034765001	Tetratricopeptide repeat 7A	1.55379
Cc10_g14270	GSCOC_T00012017001	Pathogen-related	1.55185
Cc04_g12740	GSCOC_T00008259001	Phospho-2-dehydro-3-deoxyheptonate aldolase chloroplastic	1.55113
Cc11_g08030	GSCOC_T00032930001	TIFY 6B	1.55087
Cc02_g34690	GSCOC_T00000730001	Uncharacterized protein	1.54937
Cc02_g29580	GSCOC_T00018396001	Disease resistance response 206	1.5487
Cc06_g03230	GSCOC_T00023600001	Uncharacterized protein	1.5486
Cc07_g08930	GSCOC_T00040285001	14-3-3 4	1.54766
Cc03_g04040	GSCOC_T00026109001	Probable RNA helicase SDE3	1.54748
Cc10_g14530	GSCOC_T00033590001	Uncharacterized protein	1.54707
Cc08_g00310	GSCOC_T00005589001	Uncharacterized protein	1.54707
Cc02_g35340	GSCOC_T00042863001	Uncharacterized protein R707	1.54684
Cc11_g12740	GSCOC_T00032276001	NAC transcription factor 29	1.54633
Cc06_g23880	GSCOC_T00040502001	TORTIFOLIA1 1	1.54582
Cc00_g30080	GSCOC_T00013320001	COBRA	1.54553
Cc08_g00920	GSCOC_T00038450001	Cellulose synthase A catalytic subunit	1.54416
Cc10_g07550	GSCOC_T00034507001	Phytosulfokines 3	1.54302
Cc05_g05670	GSCOC_T00035142001	zinc finger At1g68190	1.54167
Cc06_g05040	GSCOC_T00043033001	Probable leucine-rich repeat receptor kinase At1g68400	1.54085
Cc06_g01490	GSCOC_T00023369001	Uncharacterized protein	1.54073
Cc11_g14110	GSCOC_T00032104001	Uncharacterized protein	1.54062
Cc10_g11230	GSCOC_T00018469001	late blight resistance homolog R1A-6	1.53902
Cc04_g06340	GSCOC_T00022420001	Thaumatin	1.53854
Cc08_g00740	GSCOC_T00038473001	Ethylene-responsive transcription factor SHINE 3	1.53816
Cc05_g08060	GSCOC_T00016815001	Transcription factor TCP4	1.53799
Cc07_g14620	GSCOC_T00036591001	Uncharacterized protein	1.5371
Cc02_g01790	GSCOC_T00020014001	Probable trehalose-phosphate phosphatase 2	1.53562
Cc11_g07220	GSCOC_T00018081001	Ankyrin repeat-containing ITN1	1.53533
Cc08_g14850	GSCOC_T00035395001	Probable aquaporin PIP1-2	1.53422
Cc10_g15400	GSCOC_T00033719001	Purine permease 3	1.53385
Cc02_g11230	GSCOC_T00029438001	Phenylalanine ammonia-lyase	1.53324
Cc02_g39550	GSCOC_T00027699001	Uncharacterized protein At4g00950	1.53307
Cc05_g04840	GSCOC_T00035020001	Septum-promoting GTP-binding 1	1.53286
Cc02_g16170	GSCOC_T00014094001	GDSL esterase lipase At1g29670	1.53257
Cc07_g14810	GSCOC_T00036566001	Uncharacterized protein	1.53195
Cc08_g06540	GSCOC_T00036047001	Probable xyloglucan glycosyltransferase 8	1.53171
Cc01_g13670	GSCOC_T00028342001	Tubulin beta-8 chain	1.53067
Cc10_g14120	GSCOC_T00011999001	U-box domain-containing 28	1.53003
Cc01_g19860	GSCOC_T00016003001	Uncharacterized protein	1.5295
Cc07_g08730	GSCOC_T00040261001	Uncharacterized protein	1.52943
Cc05_g15590	GSCOC_T00038671001	Uncharacterized protein	1.52887
Cc02_g24220	GSCOC_T00015138001	Plasmodesmata-located 8	1.52851
Cc02_g32480	GSCOC_T00001240001	Sugar transporter ERD6-like 8	1.52652
Cc09_g08240	GSCOC_T00020765001	Probable LRR receptor-like serine threonine- kinase At3g47570	1.52537
Cc07_g04510	GSCOC_T00039707001	Olee1	1.52454
Cc03_g05540	GSCOC_T00026311001	Uncharacterized protein	1.52441
Cc00_g20860	GSCOC_T00007866001	Uncharacterized protein	1.52307
Cc02_g01910	GSCOC_T00020028001	Arabinogalactan 20	1.52156
Cc05_g04910	GSCOC_T00035035001	Uncharacterized protein	1.52066
Cc02_g05590	GSCOC_T00039071001	High mobility group B 7	1.52054
Cc00_g07820	GSCOC_T00007023001	Uncharacterized protein	1.52047
Cc03_g15460	GSCOC_T00026827001	homolog subfamily B member 6-A	1.52014
Cc03_g09960	GSCOC_T00030989001	NADPH-dependent alkenal one chloroplastic	1.52012
Cc11_g10660	GSCOC_T00032548001	Aspartic ase nepenthesin-1	1.52009
Cc01_g01490	GSCOC_T00037900001	UDP-glycosyltransferase 74E2	1.51941
Cc10_g01440	GSCOC_T00024615001	ABC transporter B family member 13	1.51935
Cc04_g03290	GSCOC_T00022022001	Acid phosphatase 1	1.51925
Cc07_g14120	GSCOC_T00036654001	O-fucosyltransferase 1	1.5191
Cc07_g13310	GSCOC_T00036760001	Nudix hydrolase mitochondrial	1.51903
Cc01_g09030	GSCOC_T00023944001	Uncharacterized protein	1.51808
Cc08_g14450	GSCOC_T00030221001	LURP-one-related 11	1.518
Cc02_g07320	GSCOC_T00029955001	Probable glycosyltransferase At5g20260	1.51674
Cc05_g02710	GSCOC_T00020896001	Shikimate O-hydroxycinnamoyltransferase	1.51579
Cc06_g10710	GSCOC_T00041744001	Leucine-rich repeat extensin 4	1.51464
Cc05_g04040	GSCOC_T00031582001	Premnaspirodiene oxygenase	1.51452
Cc06_g09790	GSCOC_T00041869001	Pentatricopeptide repeat-containing At5g21222	1.5142
Cc07_g09180	GSCOC_T00040314001	Scarecrow 15	1.51398
Cc06_g06090	GSCOC_T00043180001	Beta- insoluble isoenzyme 1	1.51389
Cc02_g38000	GSCOC_T00027919001	Rop guanine nucleotide exchange factor 2	1.51328
Cc06_g13860	GSCOC_T00041337001	Uncharacterized protein	1.51269
Cc04_g09270	GSCOC_T00022810001	Purple acid phosphatase 17	1.51228
Cc10_g08900	GSCOC_T00034325001	Uncharacterized protein	1.51132
Cc08_g13360	GSCOC_T00030353001	Uncharacterized protein At4g22758	1.51015
Cc02_g27430	GSCOC_T00025073001	Multiple C2 and transmembrane domain-containing 1	1.50909
Cc09_g09880	GSCOC_T00005755001	Aquaporin PIP2-7	1.50728
Cc00_g14400	GSCOC_T00009997001	UDP-glycosyltransferase 75C1	1.50721
Cc00_g12090	GSCOC_T00005877001	Fatty acid amide hydrolase	1.50654
Cc02_g19470	GSCOC_T00014515001	Indole-3-acetic acid-amido synthetase	1.50513
Cc11_g01890	GSCOC_T00019496001	lin-54 homolog	1.50446
Cc10_g09420	GSCOC_T00031547001	Immune-associated nucleotide-binding 8	1.50404
Cc03_g07410	GSCOC_T00026591001	Uncharacterized protein	1.50388
Cc07_g10860	GSCOC_T00037064001	Pathogenesis-related 5	1.50335
Cc05_g15350	GSCOC_T00038702001	LRR receptor-like serine threonine- kinase	1.503
Cc06_g11810	GSCOC_T00041613001	Uncharacterized protein	1.50246
Cc11_g14570	GSCOC_T00032041001	U-box domain-containing 19	1.50239
Cc07_g05610	GSCOC_T00039839001	Probable esterase PIR7A	1.50232
Cc01_g12650	GSCOC_T00028207001	Uncharacterized protein	1.5004
Cc08_g10740	GSCOC_T00027051001	Beta- insoluble isoenzyme CWINV1	1.49839
Cc05_g13360	GSCOC_T00021073001	Early nodulin 3	1.49696
Cc11_g13890	GSCOC_T00032127001	Uncharacterized protein	1.49521
Cc04_g01230	GSCOC_T00021762001	Cytochrome P450 76C2	1.49479
Cc02_g39920	GSCOC_T00027642001	NAC domain-containing 43	1.49472
Cc07_g14090	GSCOC_T00036657001	Uncharacterized protein At4g38062	1.49404
Cc08_g02380	GSCOC_T00037709001	Ent-kaurenoic acid oxidase 2	1.49332
Cc03_g01730	GSCOC_T00025795001	UDP-glucuronic acid decarboxylase 1	1.49302
Cc02_g24700	GSCOC_T00028852001	Zinc finger ZAT4	1.49287
Cc02_g08080	GSCOC_T00029848001	UDP-glucuronic acid decarboxylase 1	1.492
Cc06_g09170	GSCOC_T00041949001	Probable inactive receptor kinase At2g26730	1.49106
Cc05_g02740	GSCOC_T00020891001	E3 ubiquitin- ligase COP1	1.49071
Cc10_g12480	GSCOC_T00031960001	Cyclin-A1-1	1.48981
Cc02_g10080	GSCOC_T00029568001	Cytochrome P450 77A2	1.48977
Cc07_g10360	GSCOC_T00037124001	Cytochrome P450 84A1	1.48964
Cc10_g04700	GSCOC_T00034904001	WUSCHEL-related homeobox 4	1.48707
Cc07_g18170	GSCOC_T00018787001	Uncharacterized protein	1.48702
Cc09_g05960	GSCOC_T00033381001	Ankyrin repeat-containing ITN1	1.48624
Cc02_g39760	GSCOC_T00027671001	Uncharacterized protein	1.48586
Cc11_g11970	GSCOC_T00032376001	Ureide permease 1	1.48525
Cc06_g07270	GSCOC_T00031285001	Uncharacterized protein	1.48481
Cc02_g18620	GSCOC_T00014412001	Probable carboxylesterase 2	1.48469
Cc11_g17340	GSCOC_T00038300001	Olee1	1.48461
Cc01_g21200	GSCOC_T00005008001	Probable galacturonosyltransferase-like 7	1.48455
Cc10_g03350	GSCOC_T00024859001	Uncharacterized protein	1.48386
Cc11_g14090	GSCOC_T00032106001	Uncharacterized protein	1.48363
Cc11_g05930	GSCOC_T00020569001	Probable transmembrane ascorbate ferrireductase 3	1.48267
Cc09_g05320	GSCOC_T00007111001	Zinc transporter 5	1.48162
Cc11_g17500	GSCOC_T00038323001	E3 ubiquitin ligase DRIP2	1.48161
Cc10_g07380	GSCOC_T00034531001	Uncharacterized protein	1.48123
Cc01_g14550	GSCOC_T00028457001	BAG family molecular chaperone regulator 4	1.4801
Cc04_g11350	GSCOC_T00037306001	Manganese-dependent ADP-ribose CDP-alcohol diphosphatase	1.48004
Cc09_g00800	GSCOC_T00017903001	Tonoplast dicarboxylate transporter	1.48002
Cc10_g09270	GSCOC_T00004653001	Wall-associated receptor kinase 2	1.47975
Cc01_g10580	GSCOC_T00024157001	UDP-glycosyltransferase 86A1	1.4794
Cc06_g17090	GSCOC_T00012652001	Uncharacterized protein	1.47927
Cc09_g06260	GSCOC_T00033337001	PHLOEM PROTEIN 2-LIKE A9	1.47782
Cc00_g27590	GSCOC_T00007291001	Kirola	1.47715
Cc06_g20110	GSCOC_T00022914001	UDP-glucose flavonoid 3-O-glucosyltransferase 3	1.4771
Cc10_g07710	GSCOC_T00034488001	Transcription factor bHLH74	1.47688
Cc02_g10270	GSCOC_T00029546001	Glucomannan 4-beta-mannosyltransferase 9	1.47634
Cc07_g00660	GSCOC_T00019144001	Calcium-binding CML38	1.47632
Cc05_g07230	GSCOC_T00042250001	Probable serine threonine- kinase At1g54610	1.47622
Cc10_g07490	GSCOC_T00034515001	Probable beta-D-xylosidase 6	1.47582
Cc01_g14420	GSCOC_T00028440001	Asparagine synthetas	1.47529
Cc07_g20570	GSCOC_T00015724001	Aquaporin TIP4-1	1.47477
Cc06_g17810	GSCOC_T00040372001	Zeatin O-glucosyltransferase	1.47408
Cc07_g11020	GSCOC_T00037047001	L-ascorbate peroxidase 3	1.4735
Cc00_g17860	GSCOC_T00008903001	Probable polygalacturonase	1.47328
Cc02_g09090	GSCOC_T00029704001	c-Myc-binding homolog	1.47211
Cc02_g39890	GSCOC_T00027645001	3-ketoacyl- synthase 1	1.47193
Cc00_g28990	GSCOC_T00011722001	NRT1 PTR FAMILY	1.47075
Cc02_g07570	GSCOC_T00029920001	Aspartic ase nepenthesin-1	1.46996
Cc02_g33180	GSCOC_T00015335001	Formin 11	1.46983
Cc02_g18570	GSCOC_T00014405001	Uncharacterized protein	1.46979
Cc09_g04690	GSCOC_T00017395001	LRR receptor-like serine threonine- kinase GSO1	1.46957
Cc02_g12320	GSCOC_T00029299001	MOTHER of FT and TFL1	1.46936
Cc03_g06400	GSCOC_T00026434001	Auxin-responsive IAA13	1.46906
Cc02_g36010	GSCOC_T00042761001	Palmitoleoyl- carboxylesterase NOTUM	1.46884
Cc02_g25740	GSCOC_T00028706001	Phosphoglycolate phosphatase	1.4679
Cc04_g03540	GSCOC_T00022049001	Thionin 2	1.4678
Cc01_g17460	GSCOC_T00016322001	GDSL esterase lipase At4g28780	1.46736
Cc10_g15940	GSCOC_T00033799001	Shikimate O-hydroxycinnamoyltransferase	1.46722
Cc01_g15180	GSCOC_T00016595001	CBL-interacting serine threonine- kinase 11	1.46451
Cc03_g00120	GSCOC_T00025588001	CBL-interacting serine threonine- kinase 1	1.46357
Cc08_g07730	GSCOC_T00011861001	Uncharacterized protein	1.46282
Cc02_g21300	GSCOC_T00014767001	UDP-glycosyltransferase 85A2	1.46198
Cc04_g03630	GSCOC_T00022059001	Uncharacterized protein	1.46178
Cc10_g02940	GSCOC_T00024808001	Uncharacterized protein	1.4591
Cc11_g06660	GSCOC_T00020690001	Vacuolar iron transporter	1.45886
Cc02_g20120	GSCOC_T00014615001	Uncharacterized protein	1.45815
Cc09_g00710	GSCOC_T00017912001	Auxin-induced in root cultures 12	1.45796
Cc04_g06870	GSCOC_T00022488001	Reticulon B9	1.4572
Cc07_g03760	GSCOC_T00039621001	Chorismate mutase chloroplastic	1.45639
Cc00_g14020	GSCOC_T00010024001	3-ketoacyl- synthase 19	1.45521
Cc06_g03490	GSCOC_T00023633001	L-ascorbate peroxidase cytosolic	1.45474
Cc08_g07270	GSCOC_T00025342001	Probable LRR receptor-like serine threonine- kinase At1g14390	1.45433
Cc08_g06750	GSCOC_T00005866001	ASPARTIC PROTEASE IN GUARD CELL 2	1.4534
Cc10_g05650	GSCOC_T00034783001	Zinc finger ZAT10	1.45308
Cc02_g20360	GSCOC_T00014649001	Squalene monooxygenase	1.45173
Cc08_g17020	GSCOC_T00035681001	Soluble inorganic pyrophosphatase PPA1	1.45148
Cc11_g01190	GSCOC_T00019613001	Uncharacterized protein	1.44949
Cc11_g16500	GSCOC_T00038190001	Uncharacterized protein	1.44782
Cc07_g11510	GSCOC_T00036993001	IST1	1.44742
Cc05_g12430	GSCOC_T00021192001	Uncharacterized protein	1.44733
Cc00_g31940	GSCOC_T00009627001	UDP-glucuronate 4-epimerase 6	1.44728
Cc10_g03570	GSCOC_T00024886001	Allene oxide chloroplastic	1.4459
Cc09_g09750	GSCOC_T00011978001	Uncharacterized protein	1.44571
Cc01_g07620	GSCOC_T00009374001	Non-specific lipid-transfer At5g64080	1.44446
Cc01_g17110	GSCOC_T00016362001	Desumoylating isopeptidase 1	1.44406
Cc02_g22330	GSCOC_T00014902001	Basic blue	1.44367
Cc02_g13780	GSCOC_T00029098001	Uncharacterized protein	1.44278
Cc01_g12300	GSCOC_T00028161001	Methyl- -binding domain-containing 6	1.44232
Cc01_g03970	GSCOC_T00040873001	Isoflavone reductase homolog P3	1.44202
Cc11_g06960	GSCOC_T00020734001	RNA-dependent RNA polymerase 1	1.44136
Cc04_g09480	GSCOC_T00022837001	CASP 1F1	1.44129
Cc00_g13990	GSCOC_T00010020001	Exocyst complex component 7	1.44071
Cc08_g03510	GSCOC_T00034133001	Cellulose synthase D3	1.44065
Cc03_g09500	GSCOC_T00030930001	Uncharacterized protein	1.44021
Cc02_g04170	GSCOC_T00020321001	Monocopper oxidase SKS1	1.43959
Cc06_g18800	GSCOC_T00028908001	methyltransferase DDB_G0268948	1.4389
Cc00_g17330	GSCOC_T00001370001	NDR1	1.43746
Cc07_g05360	GSCOC_T00039807001	Uncharacterized protein	1.43737
Cc02_g09910	GSCOC_T00029593001	kinase G11A	1.43699
Cc00_g11830	GSCOC_T00007748001	Uncharacterized protein	1.43663
Cc00_g06130	GSCOC_T00003127001	Subtilisin-like protease	1.43241
Cc11_g11290	GSCOC_T00032465001	Ocs element-binding factor 1	1.43197
Cc08_g16510	GSCOC_T00035613001	Short-chain dehydrogenase TIC chloroplastic	1.4317
Cc06_g21530	GSCOC_T00008024001	Xylosyltransferase 1	1.43124
Cc06_g02510	GSCOC_T00023508001	Uncharacterized protein C24B11.05	1.42913
Cc00_g26190	GSCOC_T00008978001	Probable LRR receptor-like serine threonine- kinase At3g47570	1.42822
Cc07_g13350	GSCOC_T00036754001	Probable inactive receptor kinase At5g16590	1.42761
Cc05_g08480	GSCOC_T00016870001	Peroxidase 4	1.42713
Cc02_g20710	GSCOC_T00014689001	Probable serine threonine- kinase DDB_G0267514	1.42626
Cc06_g20370	GSCOC_T00022965001	Uncharacterized protein	1.42401
Cc02_g32240	GSCOC_T00012958001	Vesicle-associated 2-2	1.42318
Cc05_g10100	GSCOC_T00021500001	Probable glutathione S-transferase	1.42269
Cc04_g08070	GSCOC_T00022655001	Tropinone reductase homolog At1g07440	1.42162
Cc01_g13110	GSCOC_T00028271001	Laccase-3	1.42159
Cc03_g04770	GSCOC_T00026205001	Magnesium transporter MRS2-2	1.4212
Cc07_g15160	GSCOC_T00036511001	Uncharacterized protein	1.42104
Cc04_g15090	GSCOC_T00004746001	Zinc finger ZAT4	1.42097
Cc03_g01560	GSCOC_T00025771001	Bifunctional epoxide hydrolase 2	1.42064
Cc01_g00180	GSCOC_T00012416001	Cytochrome P450 716B2	1.42055
Cc03_g01090	GSCOC_T00025712001	Uncharacterized protein	1.42031
Cc02_g31560	GSCOC_T00027539001	Caskin-1	1.41941
Cc08_g00610	GSCOC_T00038491001	Uncharacterized protein	1.41899
Cc09_g01430	GSCOC_T00017812001	WRKY transcription factor 6	1.41888
Cc03_g01080	GSCOC_T00025711001	Uncharacterized protein	1.41853
Cc01_g20660	GSCOC_T00015906001	Translocator homolog	1.41846
Cc02_g12630	GSCOC_T00029259001	Probable NADH dehydrogenase	1.41698
Cc08_g02850	GSCOC_T00037780001	Uncharacterized protein	1.41644
Cc06_g05100	GSCOC_T00043043001	Uncharacterized FCP1 homology domain-containing	1.41592
Cc05_g08550	GSCOC_T00016879001	Uncharacterized protein	1.41541
Cc02_g38920	GSCOC_T00027790001	glucose-6-phosphate 1-epimerase	1.41466
Cc03_g01280	GSCOC_T00025734001	Major allergen Pru ar 1	1.41418
Cc05_g08560	GSCOC_T00016880001	Xyloglucan endotransglucosylase hydrolase 15	1.41382
Cc04_g05790	GSCOC_T00022345001	Probable beta-	1.41273
Cc02_g13580	GSCOC_T00029130001	Uncharacterized protein	1.41269
Cc11_g10480	GSCOC_T00032571001	Lysine histidine transporter-like 6	1.41155
Cc01_g03990	GSCOC_T00040860001	Isoflavone reductase homolog P3	1.41124
Cc02_g22070	GSCOC_T00014865001	UPF0496 4	1.41113
Cc06_g17390	GSCOC_T00036383001	Probable 2-aminoethanethiol dioxygenase	1.41108
Cc05_g07190	GSCOC_T00042246001	Uncharacterized protein	1.41009
Cc10_g03580	GSCOC_T00024887001	Allene oxide chloroplastic	1.41
Cc01_g16270	GSCOC_T00016461001	Asparagine--tRNA cytoplasmic 2	1.40953
Cc08_g01020	GSCOC_T00038438001	2-hydroxymuconate semialdehyde hydrolase	1.40946
Cc02_g01940	GSCOC_T00020034001	Ethylene-responsive transcription factor CRF4	1.40909
Cc10_g09410	GSCOC_T00031548001	Immune-associated nucleotide-binding 10	1.40787
Cc09_g07410	GSCOC_T00036265001	Reticuline oxidase	1.40703
Cc11_g08800	GSCOC_T00032824001	Uncharacterized protein At1g66480	1.40694
Cc09_g05580	GSCOC_T00033445001	Probable LRR receptor-like serine threonine- kinase At3g47570	1.40595
Cc05_g00830	GSCOC_T00013176001	Auxin transporter 2	1.40575
Cc03_g15890	GSCOC_T00001649001	Ankyrin repeat SKIP35	1.40451
Cc04_g03110	GSCOC_T00022000001	Uncharacterized protein	1.40415
Cc06_g12680	GSCOC_T00041507001	Sucrose synthase	1.40346
Cc11_g14750	GSCOC_T00032014001	Glucan endo-	1.40294
Cc07_g06280	GSCOC_T00039927001	Uncharacterized protein At4g06744	1.40278
Cc01_g03750	GSCOC_T00040933001	Cytochrome P450 81D1	1.40212
Cc11_g14930	GSCOC_T00001041001	NRT1 PTR FAMILY	1.40201
Cc01_g14490	GSCOC_T00028448001	chloroplastic	1.40117
Cc11_g15510	GSCOC_T00038065001	Uncharacterized protein	1.40037
Cc07_g16700	GSCOC_T00037528001	Probable S-acyltransferase 9	1.39996
Cc00_g14290	GSCOC_T00010612001	NAC domain-containing 94	1.3984
Cc02_g24520	GSCOC_T00028876001	Malate cytoplasmic	1.39792
Cc02_g35700	GSCOC_T00042807001	Pleiotropic drug resistance 3	1.39759
Cc07_g04950	GSCOC_T00039756001	Uncharacterized protein	1.39642
Cc01_g05700	GSCOC_T00027384001	F-box At4g18380	1.39637
Cc01_g17310	GSCOC_T00016339001	Probable pectate lyase 8	1.39601
Cc02_g12790	GSCOC_T00029236001	S-linalool synthase	1.3942
Cc09_g01040	GSCOC_T00017866001	EH domain-containing 1	1.39404
Cc03_g05300	GSCOC_T00026279001	Deacetoxyvindoline 4-hydroxylase	1.39392
Cc06_g12490	GSCOC_T00041531001	Probable polygalacturonase	1.39263
Cc01_g17800	GSCOC_T00016280001	Uncharacterized protein	1.3925
Cc04_g05960	GSCOC_T00022371001	Glutamine synthetase nodule isozyme	1.39198
Cc02_g35270	GSCOC_T00042873001	Uncharacterized protein	1.39021
Cc08_g16650	GSCOC_T00035631001	Stellacyanin	1.38823
Cc02_g18930	GSCOC_T00014453001	U-box domain-containing 25	1.38663
Cc01_g07240	GSCOC_T00030156001	1-aminocyclopropane-1-carboxylate oxidase homolog 12	1.38642
Cc05_g10030	GSCOC_T00021509001	Kinesin KIN-14G	1.38641
Cc08_g13770	GSCOC_T00030306001	Uncharacterized protein	1.38585
Cc06_g13690	GSCOC_T00041358001	Zinc finger CONSTANS-LIKE 4	1.38451
Cc04_g16540	GSCOC_T00035759001	Uncharacterized protein	1.38367
Cc09_g07830	GSCOC_T00003767001	3-ketoacyl- synthase 19	1.38356
Cc07_g05140	GSCOC_T00039777001	Calcium uniporter mitochondrial	1.38325
Cc04_g01240	GSCOC_T00021763001	receptor kinase At1g72540	1.38308
Cc07_g04880	GSCOC_T00039749001	BRCT domain-containing At4g02110	1.38299
Cc01_g12580	GSCOC_T00028197001	UDP-glucuronic acid decarboxylase 1	1.38272
Cc10_g04500	GSCOC_T00034926001	Uncharacterized protein At3g61260	1.382
Cc11_g03540	GSCOC_T00006459001	Kinesin KIN-14G	1.38199
Cc08_g00420	GSCOC_T00038524001	Uncharacterized vacuolar membrane YML018C	1.38185
Cc07_g05650	GSCOC_T00039843001	Dof zinc finger	1.38176
Cc05_g11890	GSCOC_T00021257001	DETOXIFICATION 19	1.38147
Cc09_g00700	GSCOC_T00017913001	U-box domain-containing 4	1.38131
Cc02_g36380	GSCOC_T00003932001	Blue copper	1.38121
Cc06_g18700	GSCOC_T00040496001	Probable tocopherol O- chloroplastic	1.37981
Cc07_g03150	GSCOC_T00039533001	IQ-DOMAIN 31	1.37943
Cc01_g14500	GSCOC_T00028449001	chloroplastic	1.37913
Cc07_g16820	GSCOC_T00037513001	Cellulose synthase A catalytic subunit	1.37909
Cc11_g14120	GSCOC_T00032103001	Uncharacterized protein	1.37886
Cc02_g15820	GSCOC_T00014046001	Aquaporin NIP1-1	1.37876
Cc08_g00870	GSCOC_T00038455001	AFG1-like ATPase	1.37846
Cc03_g07610	GSCOC_T00026616001	Low-temperature-induced 65 kDa	1.37802
Cc00_g02690	GSCOC_T00006658001	Subtilisin-like protease	1.3772
Cc02_g21750	GSCOC_T00014820001	Non-specific lipid-transfer At5g64080	1.37665
Cc08_g16310	GSCOC_T00035588001	B2	1.37649
Cc05_g05350	GSCOC_T00035102001	Uncharacterized protein	1.3763
Cc05_g10210	GSCOC_T00021488001	9-cis-epoxycarotenoid dioxygenase chloroplastic	1.37522
Cc04_g00470	GSCOC_T00021658001	D-3-phosphoglycerate dehydrogenase chloroplastic	1.37414
Cc02_g16640	GSCOC_T00014157001	Probable aquaporin PIP-type pTOM75	1.37372
Cc01_g18610	GSCOC_T00016182001	Cytochrome P450 94A1	1.37334
Cc02_g26240	GSCOC_T00028635001	RING-H2 finger ATL52	1.37324
Cc09_g07430	GSCOC_T00036260001	Reticuline oxidase	1.37212
Cc06_g05290	GSCOC_T00043072001	phytosulfokines 6	1.37209
Cc03_g04520	GSCOC_T00026174001	Probable disease resistance At1g58390	1.37111
Cc07_g13000	GSCOC_T00036804001	Uncharacterized protein	1.37012
Cc02_g15130	GSCOC_T00013948001	MALE DISCOVERER 1	1.36961
Cc07_g15500	GSCOC_T00036468001	Pollen allergen Che a 1	1.36932
Cc00_g07200	GSCOC_T00006852001	Transcription factor bHLH35	1.36856
Cc02_g20130	GSCOC_T00014616001	Pyruvate kinase isozyme chloroplastic	1.36809
Cc11_g16790	GSCOC_T00038226001	Probable mannitol dehydrogenase	1.36792
Cc08_g07140	GSCOC_T00025316001	UDP-glycosyltransferase 73C4	1.36526
Cc02_g02070	GSCOC_T00020051001	Acidic endochitinase SE2	1.36447
Cc06_g19920	GSCOC_T00022877001	Oxidoreductase	1.36417
Cc00_g21770	GSCOC_T00013697001	Palmitoyl-acyl carrier chloroplastic	1.36402
Cc02_g19960	GSCOC_T00014576001	Cyclin-D4-1	1.36391
Cc09_g01920	GSCOC_T00017746001	Uncharacterized protein	1.36276
Cc00_g11820	GSCOC_T00007746001	Cyclin-D2-1	1.36196
Cc09_g02340	GSCOC_T00017689001	Adenylate kinase	1.36068
Cc05_g10450	GSCOC_T00021439001	C2 domain-containing At1g53590	1.36059
Cc05_g05980	GSCOC_T00035195001	Malonyl-coenzyme A:anthocyanin 3-O-glucoside-6 -O-malonyltransferase	1.36018
Cc06_g00510	GSCOC_T00023230001	U-box domain-containing 16	1.36015
Cc03_g04660	GSCOC_T00026193001	Auxin-induced 22B	1.36014
Cc08_g11770	GSCOC_T00027188001	Uncharacterized protein	1.36002
Cc01_g10400	GSCOC_T00024136001	Probable glucuronoxylan glucuronosyltransferase F8H	1.35936
Cc11_g05920	GSCOC_T00020568001	Probable transmembrane ascorbate ferrireductase 3	1.35886
Cc02_g34390	GSCOC_T00000680001	pectinesterase pectinesterase inhibitor 22	1.35778
Cc08_g16780	GSCOC_T00035651001	Homeobox-leucine zipper ATHB-7	1.3576
Cc10_g06530	GSCOC_T00034641001	Probable amino acid permease 7	1.35671
Cc11_g05240	GSCOC_T00020468001	Probable potassium transporter 17	1.35654
Cc01_g14770	GSCOC_T00028487001	UDP-glycosyltransferase 87A2	1.35648
Cc11_g02000	GSCOC_T00033041001	Probable disease resistance RPP8 2	1.35643
Cc01_g16010	GSCOC_T00016493001	Calmodulin 3	1.35592
Cc11_g08090	GSCOC_T00032922001	PLANT CADMIUM RESISTANCE 2	1.35523
Cc08_g10310	GSCOC_T00026995001	Uncharacterized protein	1.35486
Cc08_g03920	GSCOC_T00034191001	Cytochrome P450 76C4	1.35428
Cc10_g05380	GSCOC_T00034815001	Cytochrome P450 81D1	1.35409
Cc04_g16510	GSCOC_T00035756001	Cyclic dof factor 3	1.35325
Cc06_g11830	GSCOC_T00041611001	Threonine chloroplastic	1.35323
Cc01_g20260	GSCOC_T00015954001	Uncharacterized protein	1.35281
Cc11_g02980	GSCOC_T00025493001	Interactor of constitutive active ROPs 3	1.35187
Cc00_g00940	GSCOC_T00041151001	Peroxidase 47	1.35146
Cc01_g17230	GSCOC_T00016350001	Uncharacterized protein	1.35116
Cc07_g17850	GSCOC_T00018838001	Cysteine-rich receptor kinase 25	1.34977
Cc06_g02330	GSCOC_T00023487001	cyclin-D7-1	1.34961
Cc10_g11220	GSCOC_T00018468001	UDP-glycosyltransferase 85A5	1.34934
Cc00_g31870	GSCOC_T00001691001	Glutathione transferase GST 23	1.34921
Cc06_g05710	GSCOC_T00043135001	Uncharacterized protein	1.34882
Cc08_g16910	GSCOC_T00035667001	Uncharacterized protein	1.34821
Cc03_g07500	GSCOC_T00026603001	F-box PP2-B11	1.34799
Cc01_g00740	GSCOC_T00011068001	Uncharacterized protein	1.34585
Cc08_g06070	GSCOC_T00024433001	Uncharacterized protein	1.34583
Cc02_g27420	GSCOC_T00025072001	Histone	1.34536
Cc09_g06740	GSCOC_T00005130001	Transmembrane 56	1.34491
Cc00_g25070	GSCOC_T00002590001	Endoglucanase 12	1.34488
Cc07_g06370	GSCOC_T00039938001	UPF0481 At3g47200	1.34427
Cc03_g04410	GSCOC_T00026160001	calcium-transporting ATPase plasma membrane-type	1.3437
Cc06_g09070	GSCOC_T00041969001	3-ketoacyl- synthase 11	1.34364
Cc01_g04720	GSCOC_T00015822001	DNA damage-repair toleration DRT100	1.342
Cc02_g36410	GSCOC_T00003927001	Cytochrome P450 76C2	1.34046
Cc04_g00970	GSCOC_T00021727001	Uncharacterized protein	1.34036
Cc02_g12550	GSCOC_T00029269001	Uncharacterized protein	1.3382
Cc06_g19620	GSCOC_T00029030001	F-box At2g32560	1.33484
Cc07_g12320	GSCOC_T00036889001	Diacylglycerol O-acyltransferase 2	1.33468
Cc01_g16350	GSCOC_T00016453001	Serine threonine- kinase OXI1	1.33462
Cc01_g08910	GSCOC_T00023929001	Uncharacterized protein	1.33452
Cc10_g09080	GSCOC_T00034299001	Uncharacterized protein	1.3322
Cc03_g05450	GSCOC_T00026300001	Inorganic phosphate transporter 1-4	1.33074
Cc10_g03020	GSCOC_T00024817001	Uncharacterized protein	1.3296
Cc07_g09990	GSCOC_T00037173001	Transcription factor bHLH110	1.32881
Cc01_g10990	GSCOC_T00024215001	Uncharacterized protein	1.32819
Cc05_g11240	GSCOC_T00021340001	TPR repeat-containing thioredoxin TTL1	1.32756
Cc04_g00650	GSCOC_T00021687001	Uncharacterized protein	1.32712
Cc02_g13910	GSCOC_T00029080001	SUPPRESSOR OF GAMMA RESPONSE 1	1.32656
Cc06_g02700	GSCOC_T00023529001	Actin	1.32638
Cc11_g02520	GSCOC_T00018511001	late blight resistance homolog R1B-17	1.32518
Cc01_g09620	GSCOC_T00024023001	Pleiotropic drug resistance 2	1.32508
Cc08_g00300	GSCOC_T00005588001	Uncharacterized protein	1.32501
Cc06_g17600	GSCOC_T00040342001	Uncharacterized protein	1.32399
Cc00_g06230	GSCOC_T00010068001	L-idonate 5-dehydrogenase	1.32366
Cc10_g11940	GSCOC_T00031873001	Uncharacterized protein	1.32319
Cc00_g04920	GSCOC_T00005511001	Uncharacterized protein	1.32274
Cc08_g12520	GSCOC_T00030470001	Sec14 cytosolic factor	1.32266
Cc01_g15390	GSCOC_T00016566001	Probable inactive receptor kinase At5g58300	1.3226
Cc09_g06910	GSCOC_T00003645001	L-type lectin-domain containing receptor kinase	1.32126
Cc07_g05170	GSCOC_T00039781001	Probable galacturonosyltransferase-like 1	1.31989
Cc03_g02930	GSCOC_T00025966001	Uncharacterized protein	1.31873
Cc06_g22540	GSCOC_T00012882001	Disease resistance RPP8	1.31781
Cc01_g16790	GSCOC_T00016400001	RPM1-interacting 4	1.31753
Cc09_g10210	GSCOC_T00041075001	Uncharacterized protein	1.31752
Cc00_g05520	GSCOC_T00006858001	Codeine O-demethylase	1.31694
Cc10_g13900	GSCOC_T00035223001	Probable serine threonine- kinase PBL11	1.31692
Cc06_g16910	GSCOC_T00004146001	Uncharacterized protein	1.316
Cc09_g08340	GSCOC_T00020786001	Uncharacterized protein	1.31525
Cc04_g12090	GSCOC_T00005253001	Uncharacterized protein	1.31518
Cc07_g06980	GSCOC_T00040030001	Glucan endo-	1.3137
Cc03_g01860	GSCOC_T00025814001	TOG array regulator of axonemal microtubules 1	1.31361
Cc02_g05510	GSCOC_T00039062001	Uncharacterized protein	1.31345
Cc04_g05510	GSCOC_T00022309001	4-coumarate-- ligase 1	1.31342
Cc06_g18750	GSCOC_T00028901001	Probable tocopherol O- chloroplastic	1.31335
Cc01_g15020	GSCOC_T00016614001	Taxadien-5-alpha-ol O-acetyltransferase	1.31335
Cc11_g06540	GSCOC_T00020671001	Receptor 12	1.31311
Cc07_g00330	GSCOC_T00019101001	Uncharacterized protein	1.31261
Cc02_g39730	GSCOC_T00027676001	Ras-related RABA3	1.31192
Cc07_g00340	GSCOC_T00019102001	Uncharacterized protein	1.31143
Cc02_g33140	GSCOC_T00015328001	Probable xyloglucan endotransglucosylase hydrolase 1	1.31101
Cc02_g22480	GSCOC_T00014919001	Uncharacterized protein	1.31085
Cc07_g00730	GSCOC_T00019151001	Chloride channel CLC-b	1.31073
Cc05_g09870	GSCOC_T00021529001	Probable amino acid permease 7	1.3091
Cc05_g08120	GSCOC_T00016823001	Uncharacterized protein	1.30893
Cc11_g03260	GSCOC_T00025442001	Transcription factor bHLH111	1.30861
Cc07_g09160	GSCOC_T00040312001	Serine threonine tyrosine- kinase HT1	1.30831
Cc04_g10070	GSCOC_T00042542001	Uncharacterized protein	1.30723
Cc04_g04720	GSCOC_T00022205001	Uncharacterized protein	1.3071
Cc00_g18340	GSCOC_T00005495001	Uncharacterized protein	1.30653
Cc11_g09790	GSCOC_T00032670001	Probable receptor kinase At5g39030	1.30564
Cc02_g18110	GSCOC_T00014346001	Uncharacterized protein	1.30557
Cc02_g36580	GSCOC_T00003906001	Probable calcium-binding CML10	1.30445
Cc08_g13890	GSCOC_T00030291001	SPX domain-containing membrane At4g22990	1.30423
Cc09_g09430	GSCOC_T00023043001	Cytochrome P450 710A1	1.30356
Cc02_g16670	GSCOC_T00014161001	Uncharacterized protein	1.30241
Cc01_g17950	GSCOC_T00016261001	Uncharacterized protein	1.30228
Cc00_g12830	GSCOC_T00008934001	ABC transporter B family member 9	1.3022
Cc04_g05480	GSCOC_T00022302001	Uncharacterized protein	1.30206
Cc01_g20250	GSCOC_T00015956001	Probable indole-3-pyruvate monooxygenase YUCCA10	1.30176
Cc09_g04080	GSCOC_T00017469001	CMP-sialic acid transporter 2	1.30166
Cc04_g05800	GSCOC_T00022347001	Phosphatidylinositol transfer 3	1.30148
Cc06_g06050	GSCOC_T00043176001	Uncharacterized protein	1.30005
Cc10_g02080	GSCOC_T00024704001	Uncharacterized protein	1.30001
Cc01_g01030	GSCOC_T00037997001	Uncharacterized protein	1.29909
Cc02_g02730	GSCOC_T00020136001	Kinesin KIF22	1.29819
Cc11_g09800	GSCOC_T00032668001	Probable leucine-rich repeat receptor kinase At1g68400	1.29799
Cc06_g05360	GSCOC_T00043083001	Uncharacterized protein	1.29781
Cc11_g09770	GSCOC_T00032673001	Probable phosphatase 2C 15	1.29728
Cc11_g13920	GSCOC_T00032124001	Transcription factor MYB1R1	1.29702
Cc03_g09320	GSCOC_T00042684001	Receptor kinase TMK1	1.29688
Cc03_g08190	GSCOC_T00033215001	Uncharacterized protein	1.29585
Cc08_g06450	GSCOC_T00036032001	UDP-glycosyltransferase 74E2	1.29449
Cc04_g16450	GSCOC_T00035743001	Cytosolic sulfotransferase 5	1.29397
Cc02_g33490	GSCOC_T00015379001	Peroxisomal membrane PMP34	1.29315
Cc08_g13490	GSCOC_T00030338001	Uncharacterized protein	1.29261
Cc03_g12260	GSCOC_T00015250001	Desiccation-related PCC13-62	1.29203
Cc04_g03760	GSCOC_T00022081001	Uncharacterized protein	1.292
Cc07_g14820	GSCOC_T00036564001	Phospho-2-dehydro-3-deoxyheptonate aldolase chloroplastic	1.29164
Cc05_g01210	GSCOC_T00000928001	Uncharacterized protein	1.29124
Cc06_g18710	GSCOC_T00040498001	Probable tocopherol O- chloroplastic	1.29089
Cc07_g02240	GSCOC_T00039408001	CASP 4A3	1.29085
Cc04_g11360	GSCOC_T00037307001	High-affinity nitrate transporter	1.2908
Cc01_g04730	GSCOC_T00015823001	DNA damage-repair toleration DRT100	1.28864
Cc07_g07600	GSCOC_T00040110001	Uncharacterized protein	1.28781
Cc02_g05140	GSCOC_T00039014001	Thioredoxin H-type	1.28758
Cc02_g19100	GSCOC_T00014474001	Cysteine ase RD21A	1.28623
Cc00_g08990	GSCOC_T00001066001	Uncharacterized protein	1.28437
Cc10_g11860	GSCOC_T00031863001	Uncharacterized protein	1.28395
Cc11_g06950	GSCOC_T00020733001	RNA-dependent RNA polymerase 1	1.28368
Cc02_g07660	GSCOC_T00029908001	Telomere repeat-binding 3	1.28363
Cc02_g38900	GSCOC_T00027793001	Uncharacterized protein	1.28323
Cc05_g10580	GSCOC_T00021424001	Mitogen-activated kinase 19	1.28262
Cc02_g27890	GSCOC_T00025144001	Uncharacterized protein	1.28256
Cc07_g07110	GSCOC_T00040048001	Uncharacterized protein	1.28246
Cc02_g38220	GSCOC_T00027891001	Ubiquitin-conjugating enzyme E2 5	1.28243
Cc08_g01510	GSCOC_T00038374001	Probable serine threonine- kinase PBL19	1.28108
Cc02_g21890	GSCOC_T00014839001	NAC domain-containing 71	1.2808
Cc07_g02590	GSCOC_T00039457001	Peroxidase 63	1.28068
Cc11_g09810	GSCOC_T00032667001	Uncharacterized protein	1.28058
Cc02_g03580	GSCOC_T00020245001	Uncharacterized protein	1.28015
Cc09_g10230	GSCOC_T00041073001	Heparan-alpha-glucosaminide N-acetyltransferase	1.27934
Cc04_g01580	GSCOC_T00021815001	Uncharacterized protein	1.27903
Cc02_g24830	GSCOC_T00028835001	Uncharacterized protein	1.27858
Cc08_g15560	GSCOC_T00035493001	Cation H(+) antiporter 18	1.27834
Cc01_g18940	GSCOC_T00016128001	Uncharacterized protein	1.27828
Cc11_g04190	GSCOC_T00001330001	polyol transporter 2	1.27794
Cc02_g19060	GSCOC_T00014469001	CBS domain-containing chloroplastic	1.27759
Cc02_g01140	GSCOC_T00019923001	Molybdate-anion transporter	1.27734
Cc06_g13760	GSCOC_T00041350001	Glutamate receptor	1.27722
Cc11_g06640	GSCOC_T00020687001	L-gulonolactone oxidase	1.27709
Cc00_g02940	GSCOC_T00004315001	Uncharacterized protein	1.27702
Cc00_g34330	GSCOC_T00004630001	Uncharacterized protein	1.27599
Cc10_g04610	GSCOC_T00034915001	Subtilisin-like protease	1.27299
Cc00_g30010	GSCOC_T00001095001	Heavy metal-associated isoprenylated plant 26	1.27275
Cc11_g02570	GSCOC_T00004554001	Serine carboxypeptidase-like 34	1.27135
Cc10_g11300	GSCOC_T00018485001	Serine threonine- kinase CCR4	1.27114
Cc07_g06080	GSCOC_T00039902001	Serine threonine- kinase BCK1 SLK1 SSP31	1.27065
Cc05_g03560	GSCOC_T00033582001	Cysteine-rich receptor kinase 25	1.26954
Cc01_g20020	GSCOC_T00015983001	Histone H2AX	1.26953
Cc01_g12160	GSCOC_T00028141001	Exocyst complex component 7	1.26818
Cc09_g07420	GSCOC_T00036263001	Reticuline oxidase	1.26798
Cc08_g16180	GSCOC_T00035571001	Uncharacterized protein	1.26664
Cc09_g04650	GSCOC_T00017399001	Uncharacterized protein	1.26652
Cc05_g07760	GSCOC_T00016777001	Receptor kinase 5	1.26421
Cc00_g27150	GSCOC_T00000739001	Probable tocopherol O- chloroplastic	1.26312
Cc06_g03670	GSCOC_T00023656001	Uncharacterized protein	1.26247
Cc06_g05960	GSCOC_T00043165001	Uncharacterized protein	1.26243
Cc03_g01930	GSCOC_T00025824001	Xyloglucan 6-xylosyltransferase 1	1.26149
Cc00_g27280	GSCOC_T00007367001	Probable pectate lyase 13	1.26089
Cc11_g13080	GSCOC_T00032226001	PHYTOCHROME KINASE SUBSTRATE 1	1.26011
Cc05_g09770	GSCOC_T00021541001	Uncharacterized protein	1.25985
Cc11_g11230	GSCOC_T00032472001	Uncharacterized protein	1.25913
Cc02_g34220	GSCOC_T00000658001	Uncharacterized protein	1.25824
Cc00_g17850	GSCOC_T00008901001	UDP-glycosyltransferase 91C1	1.25811
Cc02_g02440	GSCOC_T00020099001	Probable receptor kinase At5g24010	1.25793
Cc01_g15550	GSCOC_T00016548001	Cytochrome P450 734A6	1.25765
Cc10_g07360	GSCOC_T00034533001	Uncharacterized protein	1.25759
Cc07_g03460	GSCOC_T00039575001	Uncharacterized protein At5g19025	1.25727
Cc00_g12590	GSCOC_T00011634001	Cytochrome P450 81D1	1.25496
Cc07_g08750	GSCOC_T00040264001	Uncharacterized protein	1.25434
Cc00_g27210	GSCOC_T00000002001	Uncharacterized protein	1.25371
Cc11_g03950	GSCOC_T00034004001	Ankyrin repeat-containing ITN1	1.25354
Cc11_g17090	GSCOC_T00038265001	Uncharacterized protein	1.25351
Cc02_g18160	GSCOC_T00014352001	Guanine nucleotide-binding alpha-1 subunit	1.25306
Cc02_g38050	GSCOC_T00027912001	PAIR1	1.25301
Cc01_g16900	GSCOC_T00016388001	LON peptidase N-terminal domain and RING finger 3	1.25284
Cc00_g30720	GSCOC_T00002466001	Uncharacterized protein	1.25276
Cc03_g02360	GSCOC_T00025878001	Probable serine threonine- kinase At1g54610	1.25206
Cc07_g06750	GSCOC_T00039999001	Subtilisin-like protease	1.2519
Cc07_g11240	GSCOC_T00037024001	Aspartic ase 1	1.25189
Cc07_g18820	GSCOC_T00018688001	Probable methyltransferase PMT26	1.25183
Cc09_g06030	GSCOC_T00033373001	Glycine cleavage system H mitochondrial	1.25075
Cc03_g08750	GSCOC_T00033310001	MDIS1-interacting receptor like kinase 2	1.2505
Cc02_g11960	GSCOC_T00029352001	NAD(P)H dehydrogenase (quinone)	1.25037
Cc04_g03620	GSCOC_T00022057001	Auxin-responsive IAA16	1.24824
Cc04_g16640	GSCOC_T00035771001	Myb-related 306	1.24815
Cc05_g07220	GSCOC_T00042249001	Mannan endo-	1.24769
Cc02_g13840	GSCOC_T00029089001	homolog subfamily B member 13	1.24742
Cc05_g07710	GSCOC_T00016770001	Transcription activator GLK1	1.2468
Cc04_g07330	GSCOC_T00022544001	ASPARTIC PROTEASE IN GUARD CELL 1	1.24639
Cc05_g12640	GSCOC_T00021163001	Uncharacterized protein	1.24572
Cc02_g00010	GSCOC_T00019775001	DNA-binding SMUBP-2	1.24526
Cc02_g10980	GSCOC_T00029469001	U-box domain-containing 14	1.2448
Cc02_g38740	GSCOC_T00027818001	ABIL1	1.24154
Cc06_g02360	GSCOC_T00023490001	Thaumatin	1.23836
Cc08_g11060	GSCOC_T00027097001	Probable WRKY transcription factor 50	1.23818
Cc10_g15800	GSCOC_T00033775001	Uncharacterized protein	1.23796
Cc04_g07650	GSCOC_T00022597001	Peptidyl-prolyl cis-trans chloroplastic	1.23781
Cc02_g21770	GSCOC_T00014823001	Heavy metal-associated isoprenylated plant 26	1.23733
Cc10_g10030	GSCOC_T00031465001	Anthocyanidin	1.23663
Cc05_g09430	GSCOC_T00021586001	Transcription factor bHLH87	1.23655
Cc11_g05800	GSCOC_T00020551001	Annexin D5	1.23647
Cc11_g14010	GSCOC_T00032115001	Probable galacturonosyltransferase-like 9	1.23584
Cc02_g12940	GSCOC_T00029218001	Bifunctional epoxide hydrolase 2	1.235
Cc02_g21430	GSCOC_T00014784001	Uncharacterized protein	1.23498
Cc01_g07530	GSCOC_T00009386001	NDR1	1.23471
Cc06_g03980	GSCOC_T00023699001	Phenylalanine ammonia-lyase	1.23444
Cc10_g07700	GSCOC_T00034489001	Transcription factor bHLH74	1.23426
Cc10_g13470	GSCOC_T00035288001	Subtilisin-like protease	1.23398
Cc07_g03940	GSCOC_T00039644001	4-coumarate-- ligase-like 1	1.23396
Cc06_g06450	GSCOC_T00031381001	syntaxin-24	1.23363
Cc05_g14720	GSCOC_T00038787001	Zinc finger CCCH domain-containing 54	1.23279
Cc06_g17660	GSCOC_T00040349001	Heat stress transcription factor B-3	1.23258
Cc06_g12950	GSCOC_T00041469001	UDP-xylose transporter 3	1.23109
Cc02_g28020	GSCOC_T00025162001	Cellulose synthase A catalytic subunit	1.22977
Cc07_g09050	GSCOC_T00040299001	rough sheath 2 homolog	1.22974
Cc02_g10260	GSCOC_T00029547001	OTU domain-containing At3g57810	1.22961
Cc11_g16920	GSCOC_T00038245001	Uncharacterized protein	1.22961
Cc02_g15000	GSCOC_T00013930001	Uncharacterized protein	1.22924
Cc04_g05450	GSCOC_T00022297001	ABC transporter I family member 17	1.22901
Cc08_g07790	GSCOC_T00011873001	3-ketoacyl- synthase 10	1.2285
Cc06_g21860	GSCOC_T00015594001	NLP7	1.22828
Cc11_g14100	GSCOC_T00032105001	Uncharacterized protein	1.22719
Cc08_g15710	GSCOC_T00035511001	Uncharacterized protein	1.22656
Cc07_g00460	GSCOC_T00019117001	Glyceraldehyde-3-phosphate cytosolic	1.22572
Cc10_g00430	GSCOC_T00024493001	Glucan endo-	1.22555
Cc05_g08980	GSCOC_T00016940001	G-type lectin S-receptor-like serine threonine- kinase SD2-5	1.22549
Cc08_g10360	GSCOC_T00027000001	Probable phosphatase 2C 33	1.22513
Cc08_g15210	GSCOC_T00035448001	late blight resistance homolog R1A-3	1.22508
Cc09_g03670	GSCOC_T00017517001	Isopentenyl-diphosphate Delta-isomerase II	1.22352
Cc10_g07410	GSCOC_T00034525001	Probable trehalose-phosphate phosphatase E	1.22334
Cc07_g05600	GSCOC_T00039837001	(S)-hydroxynitrile lyase	1.22283
Cc02_g07510	GSCOC_T00029927001	L-type lectin-domain containing receptor kinase	1.22259
Cc02_g12620	GSCOC_T00029261001	Endonuclease 4	1.22251
Cc00_g30120	GSCOC_T00010047001	Heavy metal-associated isoprenylated plant 26	1.22201
Cc10_g08160	GSCOC_T00034430001	Phosphoenolpyruvate carboxykinase (ATP)	1.22187
Cc10_g01310	GSCOC_T00024601001	Probable cinnamyl alcohol dehydrogenase 6	1.22168
Cc02_g13000	GSCOC_T00029212001	NADPH:quinone oxidoreductase	1.22122
Cc02_g36770	GSCOC_T00003881001	Ferric reduction oxidase chloroplastic	1.2208
Cc08_g09390	GSCOC_T00017294001	Uncharacterized protein	1.22046
Cc10_g07720	GSCOC_T00034486001	xyloglucan glycosyltransferase 10	1.22029
Cc04_g17150	GSCOC_T00035849001	Tubulin alpha chain	1.21963
Cc08_g15450	GSCOC_T00035475001	ATPase family AAA domain-containing 1-A	1.21947
Cc01_g04400	GSCOC_T00004464001	Uncharacterized protein	1.21891
Cc00_g00850	GSCOC_T00041131001	TMV resistance N	1.21698
Cc06_g02030	GSCOC_T00023443001	Probable glutathione S-transferase	1.21536
Cc06_g20040	GSCOC_T00022900001	Tubulin beta-1 chain	1.21532
Cc07_g13520	GSCOC_T00036726001	Uncharacterized protein	1.21505
Cc06_g20390	GSCOC_T00022969001	Cytochrome P450 98A3	1.21384
Cc11_g05690	GSCOC_T00020534001	UDP-glycosyltransferase 83A1	1.21333
Cc07_g17530	GSCOC_T00008836001	Probable cinnamyl alcohol dehydrogenase 9	1.21315
Cc00_g21200	GSCOC_T00009601001	Uncharacterized protein	1.21272
Cc07_g00210	GSCOC_T00019086001	BAG family molecular chaperone regulator 4	1.21238
Cc02_g01850	GSCOC_T00020022001	RNA polymerase sigma factor	1.21169
Cc05_g04250	GSCOC_T00031637001	Uncharacterized protein	1.21089
Cc02_g30040	GSCOC_T00038950001	calcium-transporting ATPase plasma membrane-type	1.21089
Cc00_g00960	GSCOC_T00041159001	Germin subfamily 1 member 7	1.21078
Cc00_g34170	GSCOC_T00003988001	Peptide methionine sulfoxide reductase A5	1.21003
Cc10_g03030	GSCOC_T00024821001	Uncharacterized protein	1.21
Cc01_g13210	GSCOC_T00028284001	BAG family molecular chaperone regulator 1	1.20958
Cc02_g08520	GSCOC_T00029782001	Uncharacterized protein	1.20865
Cc08_g12940	GSCOC_T00030408001	Monocopper oxidase SKS1	1.20841
Cc11_g08370	GSCOC_T00032885001	MLP 31	1.20837
Cc10_g04770	GSCOC_T00034895001	Chromosome-associated kinesin KIF4A	1.20812
Cc11_g12940	GSCOC_T00032248001	Intracellular ribonuclease LX	1.20793
Cc10_g05360	GSCOC_T00034818001	Isoflavone 2 -hydroxylase	1.2075
Cc03_g07790	GSCOC_T00026643001	Probable calcium-binding CML22	1.20735
Cc03_g02420	GSCOC_T00025886001	Vesicle-associated 2-2	1.20703
Cc02_g07550	GSCOC_T00029922001	Glycerol-3-phosphate acyltransferase 5	1.20698
Cc07_g12430	GSCOC_T00036875001	Uncharacterized protein	1.20571
Cc10_g07320	GSCOC_T00034538001	Uncharacterized protein	1.20534
Cc06_g13550	GSCOC_T00041381001	Kaempferol 3-O-beta-D-galactosyltransferase	1.20324
Cc06_g12710	GSCOC_T00041503001	Polyphosphoinositide phosphatase	1.2032
Cc00_g22470	GSCOC_T00009593001	COBRA 4	1.20268
Cc11_g07040	GSCOC_T00018115001	Nudix hydrolase mitochondrial	1.20177
Cc00_g21530	GSCOC_T00007649001	G-type lectin S-receptor-like serine threonine- kinase RLK1	1.20053
Cc07_g02180	GSCOC_T00039401001	Uncharacterized protein	1.20031
Cc10_g14960	GSCOC_T00033655001	Abscisic stress-ripening 2	1.20011
Cc02_g07750	GSCOC_T00029897001	Elicitor-responsive 1	1.19913
Cc02_g38470	GSCOC_T00027858001	C-terminal binding AN	1.19884
Cc09_g01580	GSCOC_T00017791001	Arogenate dehydratase chloroplastic	1.19838
Cc08_g14170	GSCOC_T00030258001	BON1-associated 2	1.19768
Cc05_g04020	GSCOC_T00031577001	Premnaspirodiene oxygenase	1.19571
Cc06_g01780	GSCOC_T00023411001	Probable sugar phosphate phosphate translocator At3g11320	1.19471
Cc01_g09270	GSCOC_T00023975001	Uncharacterized protein	1.19359
Cc11_g02900	GSCOC_T00025510001	Disease resistance RPP8 3	1.19312
Cc09_g01270	GSCOC_T00017834001	STRUBBELIG-RECEPTOR FAMILY 8	1.19267
Cc02_g33750	GSCOC_T00015424001	E3 ubiquitin- ligase ATL6	1.19241
Cc00_g21880	GSCOC_T00013638001	UDP-glycosyltransferase 83A1	1.192
Cc06_g01240	GSCOC_T00023337001	Trihelix transcription factor GT-3b	1.19195
Cc10_g05870	GSCOC_T00034748001	Low affinity sulfate transporter 3	1.19195
Cc10_g15720	GSCOC_T00033765001	Rho GTPase-activating 12	1.19171
Cc02_g07860	GSCOC_T00029883001	Uncharacterized protein	1.19055
Cc10_g10680	GSCOC_T00019389001	ABC transporter G family member 25	1.18983
Cc08_g14130	GSCOC_T00030262001	Inactive rhomboid 1	1.18976
Cc02_g07110	GSCOC_T00009473001	Uncharacterized protein	1.18864
Cc02_g39480	GSCOC_T00027709001	Uncharacterized protein	1.18793
Cc02_g18860	GSCOC_T00014443001	ABSCISIC ACID-INSENSITIVE 5 6	1.18773
Cc05_g09380	GSCOC_T00021594001	Xyloglucan endotransglucosylase hydrolase 2	1.18764
Cc02_g17500	GSCOC_T00014268001	Uncharacterized protein	1.18761
Cc09_g06770	GSCOC_T00005135001	argonaute 3	1.18747
Cc11_g08160	GSCOC_T00032913001	Endoglucanase 8	1.18736
Cc09_g01740	GSCOC_T00017770001	Uncharacterized protein At5g41620	1.18635
Cc07_g12300	GSCOC_T00036893001	Uncharacterized transporter	1.1861
Cc04_g02760	GSCOC_T00021957001	Dehydration-responsive element-binding 3	1.18607
Cc00_g14320	GSCOC_T00011142001	NADP-dependent D-sorbitol-6-phosphate dehydrogenase	1.18589
Cc00_g34610	GSCOC_T00013454001	Glyoxylate reductase	1.1853
Cc03_g03710	GSCOC_T00026070001	Uncharacterized protein	1.18493
Cc02_g33320	GSCOC_T00015359001	Probable linoleate 9S-lipoxygenase 5	1.18416
Cc04_g06930	GSCOC_T00022494001	LEAF RUST 10 DISEASE-RESISTANCE LOCUS RECEPTOR-LIKE PROTEIN KINASE-like	1.18404
Cc02_g02420	GSCOC_T00020097001	Uncharacterized protein	1.18334
Cc02_g18210	GSCOC_T00014358001	Uncharacterized protein	1.18317
Cc00_g25410	GSCOC_T00007756001	Uncharacterized protein	1.18222
Cc02_g11560	GSCOC_T00029397001	Homeobox-leucine zipper MERISTEM L1	1.18152
Cc11_g08710	GSCOC_T00032837001	Uncharacterized protein	1.18147
Cc02_g32130	GSCOC_T00018930001	Probable inactive leucine-rich repeat receptor kinase At3g03770	1.18127
Cc03_g05630	GSCOC_T00026325001	Probable methyltransferase PMT8	1.18033
Cc01_g10160	GSCOC_T00024097001	neuralized	1.18016
Cc02_g00380	GSCOC_T00019815001	Serine threonine- kinase 36	1.17994
Cc02_g20990	GSCOC_T00014728001	Uncharacterized protein	1.17972
Cc00_g12190	GSCOC_T00012517001	Elicitor-responsive 3	1.17971
Cc03_g05800	GSCOC_T00026349001	Long-chain-alcohol oxidase FAO1	1.17818
Cc02_g37180	GSCOC_T00028028001	Uncharacterized protein	1.17761
Cc08_g02990	GSCOC_T00037803001	Bifunctional dihydroflavonol 4-reductase flavanone 4-reductase	1.17731
Cc02_g30120	GSCOC_T00038966001	IQ-DOMAIN 14	1.17688
Cc11_g10610	GSCOC_T00032554001	SUPPRESSOR OF GAMMA RESPONSE 1	1.17583
Cc02_g36810	GSCOC_T00003873001	MLO 13	1.17536
Cc10_g15290	GSCOC_T00033704001	Tryptophan aminotransferase-related 4	1.1749
Cc02_g01860	GSCOC_T00020023001	Probable WRKY transcription factor 41	1.17465
Cc04_g15670	GSCOC_T00042343001	LRR receptor-like serine threonine- kinase FEI 1	1.17463
Cc05_g00330	GSCOC_T00017061001	Patatin group A-3	1.17375
Cc02_g02580	GSCOC_T00020116001	BAHD acyltransferase DCR	1.17344
Cc02_g34520	GSCOC_T00000703001	Probable phosphatase 2C 73	1.17291
Cc08_g17000	GSCOC_T00035679001	RING-H2 finger ATL52	1.17287
Cc00_g17010	GSCOC_T00005616001	Probable glucan	1.17236
Cc09_g08190	GSCOC_T00020757001	UDP-glycosyltransferase 85A2	1.17234
Cc04_g02690	GSCOC_T00021947001	Uncharacterized protein	1.17141
Cc04_g08210	GSCOC_T00022675001	O-fucosyltransferase 1	1.17
Cc04_g02660	GSCOC_T00021942001	Uncharacterized protein	1.16983
Cc10_g06230	GSCOC_T00034687001	Laccase-14	1.16857
Cc04_g09060	GSCOC_T00022783001	LURP-one-related 8	1.16801
Cc08_g14390	GSCOC_T00030228001	Remorin	1.16777
Cc02_g11090	GSCOC_T00029455001	Probable serine threonine- kinase PBL19	1.16773
Cc00_g13190	GSCOC_T00012574001	Probable LRR receptor-like serine threonine- kinase At3g47570	1.16692
Cc02_g17700	GSCOC_T00014292001	BURP domain-containing 3	1.16589
Cc00_g26180	GSCOC_T00006051001	Bifunctional 15-cis-phytoene chromoplastic	1.16558
Cc10_g02100	GSCOC_T00024707001	Uncharacterized TPR repeat-containing At1g05150	1.16483
Cc02_g05230	GSCOC_T00039025001	Uncharacterized protein	1.16415
Cc01_g15230	GSCOC_T00016588001	Probable serine threonine- kinase WNK4	1.1639
Cc09_g06240	GSCOC_T00033339001	Furcatin hydrolase	1.16317
Cc02_g02030	GSCOC_T00020047001	ABC transporter C family member 10	1.16204
Cc07_g03380	GSCOC_T00039567001	Structural maintenance of chromosomes 4	1.16156
Cc03_g01230	GSCOC_T00025729001	Two-component response regulator ARR1	1.16094
Cc02_g09340	GSCOC_T00029665001	Cytosolic sulfotransferase 5	1.15998
Cc11_g10050	GSCOC_T00032632001	Monoglyceride lipase	1.15969
Cc10_g07480	GSCOC_T00034516001	Probable beta-D-xylosidase 6	1.15898
Cc11_g14040	GSCOC_T00032111001	Formin 8	1.15885
Cc00_g13760	GSCOC_T00013299001	Pectinesterase pectinesterase inhibitor PPE8B	1.15736
Cc11_g07550	GSCOC_T00018042001	Dynamin-related 1C	1.15713
Cc08_g08910	GSCOC_T00017228001	BURP domain-containing 3	1.15625
Cc07_g06140	GSCOC_T00039910001	F-box At5g67140	1.15576
Cc04_g16550	GSCOC_T00035760001	GDSL esterase lipase At1g74460	1.15576
Cc02_g05410	GSCOC_T00039049001	Transcription factor RF2b	1.15532
Cc05_g09260	GSCOC_T00002654001	Probable galacturonosyltransferase 15	1.15433
Cc06_g18520	GSCOC_T00040471001	Triacylglycerol lipase SDP1	1.15431
Cc02_g37760	GSCOC_T00027947001	Remorin	1.15415
[truncated: 3,796 more rows]

## Sheet: down-regulated
Gene ID	ORF Name	Protein Name	Fold Change
Cc07_g08450	GSCOC_T00040218001	DETOXIFICATION 6	-5.31813
Cc11_g07700	GSCOC_T00018016001	Uncharacterized protein	-5.22386
Cc06_g10420	GSCOC_T00041781001	Uncharacterized protein	-5.09782
Cc11_g04610	GSCOC_T00004819001	Momilactone A synthase	-5.01205
Cc01_g02560	GSCOC_T00009683001	Serine threonine exchanger	-4.96293
Cc01_g14750	GSCOC_T00028485001	CHLOROPLAST IMPORT APPARATUS 2	-4.81499
Cc02_g03180	GSCOC_T00020190001	Uncharacterized protein	-4.76777
Cc08_g15690	GSCOC_T00035509001	Ethylene-responsive transcription factor CRF2	-4.69147
Cc10_g05940	GSCOC_T00034734001	Uncharacterized protein	-4.61315
Cc07_g06910	GSCOC_T00040021001	Formamidase	-4.5748
Cc00_g10560	GSCOC_T00001817001	oxidoreductase GLYR1	-4.51979
Cc02_g06870	GSCOC_T00039240001	BAHD acyltransferase DCR	-4.38211
Cc07_g05880	GSCOC_T00039874001	Patatin-2-Kuras 1	-4.36673
Cc07_g15900	GSCOC_T00036409001	Cytochrome P450 71A1	-4.32724
Cc01_g11740	GSCOC_T00028084001	NRT1 PTR FAMILY	-4.3231
Cc00_g33270	GSCOC_T00009119001	Cytochrome P450 71A26	-4.28021
Cc10_g09360	GSCOC_T00031555001	12-oxophytodienoate reductase 2	-4.15525
Cc09_g06040	GSCOC_T00033372001	Pentatricopeptide repeat-containing At2g35130	-4.13844
Cc02_g11430	GSCOC_T00029412001	Transcription initiation factor IIF subunit beta	-4.10777
Cc05_g07600	GSCOC_T00016754001	Tyrosine aminotransferase	-4.08702
Cc06_g19300	GSCOC_T00028987001	Uncharacterized protein	-4.07203
Cc08_g00790	GSCOC_T00038464001	Uncharacterized protein	-3.95552
Cc02_g38390	GSCOC_T00027870001	Ferric reduction oxidase 2	-3.88676
Cc04_g08700	GSCOC_T00022743001	G-type lectin S-receptor-like serine threonine- kinase CES101	-3.82369
Cc08_g10810	GSCOC_T00027060001	Heat shock factor HSF30	-3.76313
Cc11_g08330	GSCOC_T00032889001	Phosphomannomutase phosphoglucomutase	-3.75124
Cc00_g28960	GSCOC_T00002176001	Cytochrome P450 71A8	-3.71357
Cc07_g13750	GSCOC_T00036700001	Probable mannitol dehydrogenase	-3.63721
Cc07_g15920	GSCOC_T00037632001	Cytochrome P450 71A1	-3.61124
Cc06_g07180	GSCOC_T00031296001	Uncharacterized protein	-3.59268
Cc04_g08690	GSCOC_T00022742001	Receptor-like serine threonine- kinase SD1-7	-3.54396
Cc08_g11960	GSCOC_T00030548001	Uncharacterized protein	-3.52354
Cc01_g11730	GSCOC_T00028083001	NRT1 PTR FAMILY	-3.52101
Cc10_g04110	GSCOC_T00034975001	Uncharacterized protein	-3.34183
Cc11_g07710	GSCOC_T00018015001	Two-component response regulator ARR1	-3.28087
Cc00_g34010	GSCOC_T00006265001	UDP-glucose flavonoid 3-O-glucosyltransferase 3	-3.26696
Cc01_g15310	GSCOC_T00016578001	RING-H2 finger ATL73	-3.25156
Cc02_g11650	GSCOC_T00029385001	Thiamine thiazole synthase chloroplastic	-3.23514
Cc02_g04780	GSCOC_T00020400001	pentatricopeptide repeat-containing At3g23330	-3.21701
Cc00_g11800	GSCOC_T00007741001	Probable disease resistance At4g19060	-3.21592
Cc05_g02340	GSCOC_T00001632001	UDP-glucose flavonoid 3-O-glucosyltransferase 6	-3.17213
Cc01_g20190	GSCOC_T00015962001	Xanthoxin dehydrogenase	-3.16985
Cc00_g33170	GSCOC_T00000564001	Probable leucine-rich repeat receptor kinase At1g35710	-3.13174
Cc02_g02310	GSCOC_T00020082001	Uncharacterized protein PAM68-like	-3.12809
Cc11_g11280	GSCOC_T00032466001	Chaperonin 60 subunit beta chloroplastic	-3.12557
Cc00_g24670	GSCOC_T00005960001	Cytochrome P450 81D1	-3.12091
Cc06_g08780	GSCOC_T00031087001	Uncharacterized protein	-3.11956
Cc00_g35910	GSCOC_T00011630001	amidase	-3.11589
Cc10_g15170	GSCOC_T00033685001	Probable serine threonine- kinase At1g54610	-3.08927
Cc10_g08280	GSCOC_T00034411001	Uncharacterized protein	-3.0801
Cc02_g09540	GSCOC_T00029644001	Cationic amino acid transporter chloroplastic	-3.06749
Cc06_g03890	GSCOC_T00023687001	V-type proton ATPase subunit G2	-3.04085
Cc08_g13980	GSCOC_T00030279001	Sugar carrier C	-3.03601
Cc00_g09200	GSCOC_T00012300001	Cytochrome P450 71A8	-3.02239
Cc06_g09660	GSCOC_T00041885001	Heat stress transcription factor C-1	-2.98411
Cc03_g05490	GSCOC_T00026306001	Probable disease resistance RXW24L	-2.97271
Cc02_g07170	GSCOC_T00009484001	UDP-glycosyltransferase 85A2	-2.96757
Cc01_g04260	GSCOC_T00039305001	Bifunctional peptidase and arginyl-hydroxylase JMJD5	-2.96161
Cc07_g09110	GSCOC_T00040307001	Anthocyanidin 3-O-glucosyltransferase 5	-2.95246
Cc05_g08240	GSCOC_T00016842001	Heparanase 3	-2.943
Cc01_g13950	GSCOC_T00028379001	Phosphomethylpyrimidine chloroplastic	-2.94073
Cc05_g07550	GSCOC_T00042287001	Zinc finger CCCH domain-containing 61	-2.91821
Cc06_g03870	GSCOC_T00023684001	serine threonine- kinase (Fragment)	-2.90632
Cc02_g18370	GSCOC_T00014378001	Uncharacterized protein	-2.88838
Cc04_g15420	GSCOC_T00042312001	2-aminoethanethiol dioxygenase	-2.87323
Cc04_g11330	GSCOC_T00037304001	Receptor-like serine threonine- kinase NCRK	-2.86524
Cc07_g07790	GSCOC_T00040139001	Uncharacterized protein At5g65660	-2.85344
Cc05_g01710	GSCOC_T00015747001	Linoleate 13S-lipoxygenase 3- chloroplastic	-2.8491
Cc01_g20530	GSCOC_T00015921001	Zinc finger NUTCRACKER	-2.83859
Cc04_g07770	GSCOC_T00022613001	Ethylene-responsive transcription factor RAP2-11	-2.83589
Cc06_g14550	GSCOC_T00041240001	DNA-directed RNA polymerase chloroplastic	-2.83373
Cc00_g01640	GSCOC_T00002753001	Uncharacterized protein	-2.81061
Cc02_g39670	GSCOC_T00027684001	Probable serine threonine- kinase WNK4	-2.80749
Cc05_g09010	GSCOC_T00002682001	17.6 kDa class I heat shock 3	-2.7695
Cc06_g19580	GSCOC_T00029025001	UDP-glucose flavonoid 3-O-glucosyltransferase 6	-2.76915
Cc04_g00920	GSCOC_T00021720001	homolog subfamily B member 6	-2.75604
Cc11_g07690	GSCOC_T00018017001	Adagio 3	-2.74238
Cc00_g01590	GSCOC_T00003673001	Exocyst complex component 7	-2.72633
Cc06_g14540	GSCOC_T00041242001	DNA-directed RNA polymerase chloroplastic	-2.71901
Cc01_g02300	GSCOC_T00019329001	50S ribosomal chloroplastic	-2.71766
Cc10_g05480	GSCOC_T00034801001	F-box FBW2	-2.69773
Cc01_g02940	GSCOC_T00013235001	G-type lectin S-receptor-like serine threonine- kinase At1g11303	-2.69128
Cc06_g07020	GSCOC_T00031314001	Probable carboxylesterase 15	-2.68142
Cc06_g02000	GSCOC_T00023440001	Copper transporter 2	-2.67795
Cc03_g10510	GSCOC_T00031070001	MDIS1-interacting receptor like kinase 2	-2.67368
Cc07_g09380	GSCOC_T00037250001	Proline-rich receptor kinase PERK5	-2.6692
Cc11_g10150	GSCOC_T00032615001	Zinc finger CONSTANS-LIKE 16	-2.62905
Cc07_g08720	GSCOC_T00040260001	Chloroplastic group IIB intron splicing facilitator chloroplastic	-2.62595
Cc06_g06180	GSCOC_T00031416001	Uncharacterized protein	-2.61973
Cc06_g08060	GSCOC_T00031179001	Telomere-associated RIF1	-2.61863
Cc11_g02490	GSCOC_T00018504001	late blight resistance homolog R1B-17	-2.61373
Cc08_g09450	GSCOC_T00026884001	UPF0481 At3g02645	-2.60764
Cc07_g09960	GSCOC_T00037177001	Probable mitochondrial chaperone bcs1	-2.60559
Cc01_g17720	GSCOC_T00016290001	Tyrosine decarboxylase 1	-2.6013
Cc05_g10840	GSCOC_T00021390001	Probable LRR receptor-like serine threonine- kinase At1g53430	-2.60082
Cc01_g19670	GSCOC_T00016028001	Uncharacterized isomerase BH0283	-2.58122
Cc02_g06050	GSCOC_T00039129001	Ferritin- chloroplastic	-2.56952
Cc02_g00650	GSCOC_T00019854001	UNC93 2	-2.56467
Cc07_g15540	GSCOC_T00036462001	Low affinity sulfate transporter 3	-2.55555
Cc00_g25720	GSCOC_T00000474001	UDP-glucose flavonoid 3-O-glucosyltransferase 6	-2.55125
Cc07_g00040	GSCOC_T00019066001	Uncharacterized protein L728	-2.55078
Cc01_g11420	GSCOC_T00024271001	2-methylacyl- mitochondrial	-2.52839
Cc00_g19220	GSCOC_T00011836001	Uncharacterized protein	-2.5134
Cc00_g06550	GSCOC_T00005831001	Gibberellin 20 oxidase 1	-2.51111
Cc10_g03140	GSCOC_T00024835001	Cytochrome P450 734A1	-2.50828
Cc02_g04440	GSCOC_T00020357001	Uncharacterized protein	-2.48664
Cc03_g15590	GSCOC_T00026848001	UDP-glucose flavonoid 3-O-glucosyltransferase 6	-2.48582
Cc06_g00800	GSCOC_T00023280001	DETOXIFICATION chloroplastic	-2.48375
Cc06_g08370	GSCOC_T00031139001	EIN3-binding F-box 1	-2.47079
Cc02_g01580	GSCOC_T00019984001	Calcineurin B 4	-2.46276
Cc11_g01420	GSCOC_T00019568001	Pleiotropic drug resistance 1	-2.46147
Cc02_g34680	GSCOC_T00000729001	homolog subfamily B member 6	-2.45749
Cc01_g16470	GSCOC_T00016437001	Uncharacterized protein	-2.44984
Cc02_g11040	GSCOC_T00029463001	Lysine histidine transporter 1	-2.44309
Cc05_g10160	GSCOC_T00021494001	Probable glutathione S-transferase parC	-2.4281
Cc01_g01550	GSCOC_T00037891001	Uncharacterized protein	-2.41791
Cc02_g23860	GSCOC_T00015090001	Probable leucine-rich repeat receptor kinase At5g49770	-2.40945
Cc01_g08300	GSCOC_T00015533001	Alcohol dehydrogenase-like 7	-2.40242
Cc00_g01780	GSCOC_T00002847001	Uncharacterized protein	-2.39898
Cc06_g04120	GSCOC_T00023719001	RNA polymerase sigma factor	-2.3985
Cc01_g10350	GSCOC_T00024125001	Uncharacterized protein	-2.39386
Cc04_g06180	GSCOC_T00022400001	60S ribosomal L19-2	-2.38691
Cc02_g18840	GSCOC_T00014441001	Uncharacterized protein	-2.38321
Cc05_g14290	GSCOC_T00038836001	Uncharacterized protein	-2.38316
Cc11_g02480	GSCOC_T00018503001	Uncharacterized protein	-2.38042
Cc00_g30760	GSCOC_T00004674001	Linoleate 13S-lipoxygenase 3- chloroplastic	-2.37866
Cc06_g19570	GSCOC_T00029024001	UDP-glucose flavonoid 3-O-glucosyltransferase 3	-2.3775
Cc00_g01420	GSCOC_T00010644001	L-type lectin-domain containing receptor kinase	-2.37587
Cc02_g06740	GSCOC_T00039218001	Uncharacterized protein	-2.37389
Cc00_g27370	GSCOC_T00001308001	Linoleate 13S-lipoxygenase 3- chloroplastic	-2.36942
Cc11_g09600	GSCOC_T00032697001	lipid phosphate phosphatase chloroplastic	-2.36409
Cc02_g00640	GSCOC_T00019853001	UNC93 2	-2.36359
Cc02_g09100	GSCOC_T00029703001	Uncharacterized protein	-2.35665
Cc01_g04060	GSCOC_T00039270001	Linoleate 13S-lipoxygenase 2- chloroplastic	-2.3505
Cc02_g34470	GSCOC_T00000696001	F-box VBF	-2.34807
Cc09_g09090	GSCOC_T00023108001	Probable purine permease 10	-2.34335
Cc08_g12440	GSCOC_T00030483001	glucuronosyltransferase PGSIP7	-2.34334
Cc01_g19310	GSCOC_T00016076001	Uncharacterized isomerase BH0283	-2.31635
Cc02_g11030	GSCOC_T00029464001	Vacuolar amino acid transporter 1	-2.31471
Cc02_g23670	GSCOC_T00015069001	Uncharacterized protein	-2.31187
Cc00_g18310	GSCOC_T00006368001	Uncharacterized protein	-2.31141
Cc10_g09060	GSCOC_T00034302001	Pentatricopeptide repeat-containing At1g71490	-2.31113
Cc09_g10130	GSCOC_T00041085001	Alph	-2.30801
Cc08_g10070	GSCOC_T00026966001	Zinc finger CCCH domain-containing 20	-2.30715
Cc02_g14450	GSCOC_T00013856001	GDSL esterase lipase At5g45920	-2.30486
Cc08_g02240	GSCOC_T00037686001	Leucine-rich repeat receptor-like serine threonine- kinase BAM1	-2.30268
Cc08_g03310	GSCOC_T00010788001	Ethylene-responsive transcription factor WRI1	-2.30073
Cc05_g08810	GSCOC_T00016913001	Secologanin synthase	-2.29724
Cc07_g01700	GSCOC_T00039346001	Uncharacterized protein	-2.28661
Cc08_g07830	GSCOC_T00011878001	F-box only 6	-2.28045
Cc07_g06920	GSCOC_T00040022001	Formamidase	-2.27781
Cc02_g04770	GSCOC_T00020399001	Cytosolic sulfotransferase 5	-2.27476
Cc04_g15290	GSCOC_T00042298001	ABC transporter A family member 11	-2.24973
Cc02_g16580	GSCOC_T00014151001	Uncharacterized protein	-2.23591
Cc06_g00790	GSCOC_T00023279001	DETOXIFICATION chloroplastic	-2.23068
Cc02_g03620	GSCOC_T00020251001	Gibberellin 20 oxidase 1-D	-2.22985
Cc04_g02480	GSCOC_T00021920001	Uncharacterized protein	-2.20927
Cc06_g13100	GSCOC_T00041447001	Uncharacterized protein	-2.19441
Cc05_g15330	GSCOC_T00038705001	Peptidyl-prolyl cis-trans isomerase FKBP16- chloroplastic	-2.19327
Cc06_g22490	GSCOC_T00012876001	UDP-glucose flavonoid 3-O-glucosyltransferase 6	-2.18516
Cc04_g15650	GSCOC_T00042341001	Momilactone A synthase	-2.18396
Cc03_g13730	GSCOC_T00031728001	Polygalacturonase-1 non-catalytic subunit beta	-2.1808
Cc03_g12410	GSCOC_T00015223001	Chitinase 2	-2.16971
Cc09_g10700	GSCOC_T00041014001	Uncharacterized protein	-2.16755
Cc00_g28310	GSCOC_T00005346001	disease resistance RGA1	-2.1635
Cc02_g01630	GSCOC_T00019990001	GDSL esterase lipase At4g10955	-2.16246
Cc04_g10200	GSCOC_T00042562001	Vinorine synthase	-2.15811
Cc01_g08210	GSCOC_T00015514001	Peroxidase 64	-2.15527
Cc01_g21550	GSCOC_T00004967001	Pentatricopeptide repeat-containing mitochondrial	-2.15463
Cc05_g07730	GSCOC_T00016772001	Pentatricopeptide repeat-containing At5g66631	-2.15104
Cc06_g07200	GSCOC_T00031294001	Lysosomal beta glucosidase	-2.1473
Cc00_g34880	GSCOC_T00012245001	Uncharacterized protein	-2.14553
Cc01_g19590	GSCOC_T00016040001	Antifungal ginkbilobin-2	-2.14299
Cc10_g05250	GSCOC_T00034834001	Cytochrome P450 81D1	-2.1415
Cc10_g03990	GSCOC_T00034991001	Uroporphyrinogen-III chloroplastic	-2.14057
Cc02_g16340	GSCOC_T00014117001	Uncharacterized protein	-2.13474
Cc07_g15870	GSCOC_T00036416001	Cytochrome P450 71A1	-2.12947
Cc08_g02550	GSCOC_T00037731001	Uncharacterized protein	-2.12675
Cc01_g08820	GSCOC_T00023919001	Uncharacterized protein	-2.12392
Cc04_g02530	GSCOC_T00021926001	Clavaminate synthase At3g21360	-2.12375
Cc06_g02040	GSCOC_T00023444001	Probable glutathione S-transferase	-2.11966
Cc07_g09060	GSCOC_T00040300001	Geranylgeranyl pyrophosphate chloroplastic	-2.11455
Cc11_g10420	GSCOC_T00032581001	late blight resistance homolog R1A-6	-2.10771
Cc08_g11080	GSCOC_T00027100001	Uncharacterized protein	-2.10578
Cc02_g01590	GSCOC_T00019985001	Calcineurin B 7	-2.09758
Cc09_g05050	GSCOC_T00007077001	Cationic amino acid transporter 5	-2.09059
Cc07_g14470	GSCOC_T00036611001	Magnesium-transporting P-type 1	-2.07868
Cc06_g05590	GSCOC_T00043117001	Solute carrier family 35 member F1	-2.07298
Cc04_g07070	GSCOC_T00022512001	Chloroplastic group IIA intron splicing facilitator chloroplastic	-2.07239
Cc00_g20580	GSCOC_T00007455001	5-epiaristolochene synthase	-2.0712
Cc10_g02800	GSCOC_T00024789001	homolog subfamily C member 2	-2.07091
Cc04_g11270	GSCOC_T00037297001	Cytochrome P450 71A8	-2.06925
Cc06_g18610	GSCOC_T00040485001	Pentatricopeptide repeat-containing At5g66520	-2.05472
Cc11_g11720	GSCOC_T00032409001	MADS-box CMB1	-2.05025
Cc00_g09590	GSCOC_T00007381001	Small subunit processome component 20 homolog	-2.04544
Cc02_g36600	GSCOC_T00003902001	Pentatricopeptide repeat-containing At1g01970	-2.03797
Cc01_g03370	GSCOC_T00033123001	MDIS1-interacting receptor like kinase 2	-2.03702
Cc02_g15240	GSCOC_T00013965001	Probable LRR receptor-like serine threonine- kinase At3g47570	-2.03572
Cc01_g02990	GSCOC_T00019058001	UDP-glucose flavonoid 3-O-glucosyltransferase 6	-2.03246
Cc07_g13090	GSCOC_T00036795001	Uncharacterized protein	-2.03142
Cc05_g05360	GSCOC_T00035104001	SHORT-ROOT	-2.02666
Cc10_g00630	GSCOC_T00024520001	BTB POZ domain-containing At2g30600	-2.02291
Cc06_g06070	GSCOC_T00043178001	Pentatricopeptide repeat-containing At4g21065	-2.02144
Cc03_g09790	GSCOC_T00030969001	Probable aldo-keto reductase 2	-2.01656
Cc08_g15170	GSCOC_T00035443001	Heat shock 83	-2.0159
Cc09_g04920	GSCOC_T00007061001	Pentatricopeptide repeat-containing mitochondrial	-2.01085
Cc01_g04640	GSCOC_T00041208001	Uncharacterized protein	-2.00654
Cc07_g01180	GSCOC_T00019207001	Uncharacterized protein	-2.00597
Cc08_g15580	GSCOC_T00035495001	Uncharacterized protein	-2.00105
Cc00_g34260	GSCOC_T00012941001	amidase	-1.99402
Cc04_g06390	GSCOC_T00022425001	Peptidyl-prolyl cis-trans isomerase FKBP17- chloroplastic	-1.99241
Cc02_g36610	GSCOC_T00003901001	Uncharacterized protein	-1.98786
Cc04_g07590	GSCOC_T00022589001	chloroplastic	-1.9858
Cc05_g11580	GSCOC_T00021297001	Uncharacterized protein	-1.98276
Cc08_g02420	GSCOC_T00037715001	Pentatricopeptide repeat-containing chloroplastic	-1.98112
Cc02_g11940	GSCOC_T00029354001	DAG chloroplastic	-1.97916
Cc02_g28510	GSCOC_T00009437001	RNA polymerase sigma factor	-1.97694
Cc00_g31530	GSCOC_T00007984001	UDP-glycosyltransferase 85A2	-1.97484
Cc04_g04390	GSCOC_T00022163001	Uncharacterized protein	-1.97036
Cc11_g15010	GSCOC_T00001030001	Ethylene-responsive transcription factor ERF113	-1.96943
Cc00_g27800	GSCOC_T00010800001	Elongation factor 1-alpha	-1.9549
Cc03_g08600	GSCOC_T00033288001	MDIS1-interacting receptor like kinase 2	-1.95465
Cc04_g03770	GSCOC_T00022083001	Pentatricopeptide repeat-containing chloroplastic	-1.95381
Cc06_g21280	GSCOC_T00018124001	4-alpha-glucanotransferase DPE2	-1.95072
Cc07_g01540	GSCOC_T00039326001	Uncharacterized CRM domain-containing chloroplastic	-1.94316
Cc11_g04730	GSCOC_T00042900001	Cytochrome P450 78A3	-1.94065
Cc04_g05250	GSCOC_T00022272001	Heat shock 70 kDa	-1.94033
Cc06_g08340	GSCOC_T00031144001	Uncharacterized protein	-1.93931
Cc06_g03110	GSCOC_T00023583001	Uncharacterized protein	-1.93533
Cc07_g05730	GSCOC_T00039853001	Two-component response regulator ARR1	-1.93426
Cc00_g21970	GSCOC_T00011086001	MDIS1-interacting receptor like kinase 2	-1.93249
Cc07_g17870	GSCOC_T00018834001	Histone-lysine N-methyltransferase 2C	-1.92981
Cc02_g10520	GSCOC_T00029521001	Non-symbiotic hemoglobin 2	-1.92459
Cc00_g23290	GSCOC_T00006925001	Transcription factor bHLH157	-1.9225
Cc02_g34040	GSCOC_T00000635001	Transcription factor bHLH18	-1.92151
Cc09_g04970	GSCOC_T00007067001	Pentatricopeptide repeat-containing chloroplastic	-1.91956
Cc00_g01410	GSCOC_T00010642001	L-type lectin-domain containing receptor kinase	-1.91
Cc01_g14480	GSCOC_T00028447001	Potassium transporter 1	-1.90222
Cc01_g07410	GSCOC_T00030177001	Alcohol dehydrogenase-like 7	-1.9018
Cc10_g12670	GSCOC_T00031986001	translocase subunit chloroplastic	-1.89996
Cc07_g09980	GSCOC_T00037175001	Disease resistance RPP13 4	-1.89778
Cc01_g14000	GSCOC_T00028385001	Sodium-dependent phosphate transport chloroplastic	-1.89517
Cc07_g15740	GSCOC_T00036435001	Uncharacterized protein	-1.8935
Cc09_g04830	GSCOC_T00017375001	Probable inorganic phosphate transporter 1-8	-1.89293
Cc07_g15840	GSCOC_T00036419001	pentatricopeptide repeat-containing At1g68930	-1.8915
Cc10_g07000	GSCOC_T00034585001	UDP-glycosyltransferase 85A2	-1.89035
Cc06_g13540	GSCOC_T00041383001	DETOXIFICATION 2	-1.88949
Cc00_g30450	GSCOC_T00013101001	Primary amine oxidase	-1.8891
Cc06_g08690	GSCOC_T00031097001	Probable ethanolamine kinase A	-1.88435
Cc05_g05280	GSCOC_T00035095001	late blight resistance homolog R1A-6	-1.884
Cc04_g08520	GSCOC_T00022714001	GDSL esterase lipase At5g03980	-1.88155
Cc06_g15850	GSCOC_T00030767001	MDIS1-interacting receptor like kinase 2	-1.87487
Cc03_g02120	GSCOC_T00025847001	GTPase Obg	-1.86989
Cc00_g13340	GSCOC_T00003691001	Actin-101	-1.86909
Cc11_g08980	GSCOC_T00032803001	late blight resistance homolog R1A-6	-1.86866
Cc05_g11080	GSCOC_T00021360001	Uncharacterized protein	-1.86611
Cc05_g08740	GSCOC_T00016906001	Secologanin synthase	-1.86453
Cc04_g14540	GSCOC_T00040698001	L-type lectin-domain containing receptor kinase	-1.85938
Cc08_g10760	GSCOC_T00027054001	Beta- insoluble isoenzyme CWINV1	-1.85364
Cc06_g22880	GSCOC_T00040656001	glucose-6-phosphate 1-epimerase	-1.85236
Cc02_g15550	GSCOC_T00014009001	Probable WRKY transcription factor 65	-1.85027
Cc00_g06700	GSCOC_T00007497001	Dihydroflavonol 4-reductase	-1.84925
Cc09_g06080	GSCOC_T00033365001	LRR receptor-like serine threonine- kinase FLS2	-1.84533
Cc11_g15110	GSCOC_T00001014001	Light-regulated chloroplastic	-1.84315
Cc05_g13260	GSCOC_T00021087001	ABC transporter B family member 18	-1.84157
Cc02_g14890	GSCOC_T00013915001	Pentatricopeptide repeat-containing At2g36730	-1.83964
Cc03_g05070	GSCOC_T00026246001	Ethylene receptor 2	-1.83657
Cc02_g30570	GSCOC_T00023788001	calcium-transporting ATPase plasma membrane-type	-1.83434
Cc04_g16060	GSCOC_T00042397001	Uncharacterized protein	-1.83335
Cc04_g12400	GSCOC_T00005299001	Pentatricopeptide repeat-containing At4g02750	-1.83304
Cc05_g08850	GSCOC_T00016920001	Secologanin synthase	-1.83038
Cc11_g05090	GSCOC_T00020449001	Uncharacterized protein	-1.81842
Cc07_g10780	GSCOC_T00037074001	Chaperone dnaJ chloroplastic	-1.81683
Cc07_g14500	GSCOC_T00036608001	Transcription factor bHLH96	-1.80557
Cc01_g02950	GSCOC_T00013237001	G-type lectin S-receptor-like serine threonine- kinase At1g11303	-1.80489
Cc06_g17680	GSCOC_T00040351001	Mitochondrial ribosome-associated GTPase 1	-1.80287
Cc04_g08770	GSCOC_T00022751001	RNA pseudouridine synthase mitochondrial	-1.80095
Cc05_g08230	GSCOC_T00016841001	Heparanase 3	-1.80023
Cc11_g06390	GSCOC_T00020651001	G-type lectin S-receptor-like serine threonine- kinase At5g24080	-1.79994
Cc08_g14040	GSCOC_T00030272001	F-box PP2-A12	-1.79874
Cc01_g09110	GSCOC_T00023955001	Glucan endo-	-1.79635
Cc05_g14420	GSCOC_T00038821001	Cell division homolog chloroplastic	-1.79622
Cc00_g28880	GSCOC_T00002612001	ATPase family AAA domain-containing 3-B	-1.79576
Cc11_g04200	GSCOC_T00001333001	Phosphoribosylformylglycinamidine cyclo- chloroplastic mitochondrial	-1.79538
Cc01_g18440	GSCOC_T00016205001	Nephrocystin-3	-1.79505
Cc02_g16800	GSCOC_T00014176001	Probable ribosome-binding factor chloroplastic	-1.79491
Cc09_g06320	GSCOC_T00011292001	Peptidyl-prolyl cis-trans isomerase FKBP17- chloroplastic	-1.79231
Cc01_g10450	GSCOC_T00024141001	Serine carboxypeptidase-like 48	-1.78692
Cc05_g08790	GSCOC_T00016911001	Secologanin synthase	-1.78181
Cc07_g06900	GSCOC_T00040019001	LOB domain-containing 38	-1.777
Cc04_g08530	GSCOC_T00022715001	Pentatricopeptide repeat-containing mitochondrial	-1.77664
Cc02_g08830	GSCOC_T00029745001	Uncharacterized protein	-1.77629
Cc09_g01290	GSCOC_T00017832001	Uncharacterized protein	-1.77575
Cc01_g12760	GSCOC_T00028221001	E3 ubiquitin- ligase XBAT31	-1.77356
Cc10_g03710	GSCOC_T00024907001	Ent-kaurene chloroplastic	-1.77206
Cc06_g04470	GSCOC_T00042956001	Myb-related MYBAS1	-1.77019
Cc07_g01710	GSCOC_T00039347001	Uncharacterized protein	-1.76747
Cc04_g15200	GSCOC_T00002609001	Pentatricopeptide repeat-containing At1g25360	-1.7661
Cc08_g05610	GSCOC_T00024342001	Probable carotenoid cleavage dioxygenase chloroplastic	-1.76414
Cc03_g01840	GSCOC_T00025812001	Uncharacterized protein	-1.76304
Cc07_g10540	GSCOC_T00037102001	Histone H1	-1.7627
Cc02_g17920	GSCOC_T00014323001	Cytochrome c biogenesis chloroplastic	-1.76153
Cc03_g06290	GSCOC_T00026419001	Mitochondrial import receptor subunit TOM9-2	-1.76153
Cc00_g19130	GSCOC_T00000895001	Uncharacterized protein	-1.75747
Cc05_g09120	GSCOC_T00002669001	Glutamyl-tRNA(Gln) amidotransferase subunit chloroplastic mitochondrial	-1.75536
Cc07_g06960	GSCOC_T00040026001	Uncharacterized protein	-1.75502
Cc07_g16690	GSCOC_T00037530001	Uncharacterized protein	-1.75016
Cc09_g03040	GSCOC_T00017597001	Uncharacterized protein	-1.7501
Cc02_g03820	GSCOC_T00020280001	Uncharacterized protein	-1.74688
Cc02_g10510	GSCOC_T00029522001	Non-symbiotic hemoglobin 2	-1.74482
Cc02_g39170	GSCOC_T00027754001	Uncharacterized protein	-1.74328
Cc05_g14410	GSCOC_T00038822001	Cell division homolog chloroplastic	-1.7402
Cc03_g01750	GSCOC_T00025797001	E3 ubiquitin- ligase LIN-1	-1.73876
Cc11_g12980	GSCOC_T00032242001	Vacuolar amino acid transporter 1	-1.73798
Cc07_g03670	GSCOC_T00039611001	Ethylene-responsive transcription factor RAP2-11	-1.73769
Cc00_g16690	GSCOC_T00012625001	Gibberellin 3-beta-dioxygenase 4	-1.73549
Cc02_g09890	GSCOC_T00029595001	Pentatricopeptide repeat-containing At2g27610	-1.73548
Cc06_g14230	GSCOC_T00041284001	Uncharacterized protein	-1.73209
Cc02_g25240	GSCOC_T00028775001	Uncharacterized protein	-1.72959
Cc11_g03910	GSCOC_T00034000001	Pentatricopeptide repeat-containing chloroplastic	-1.72869
Cc02_g17340	GSCOC_T00014246001	Glucose-1-phosphate adenylyltransferase large subunit 1 (Fragment)	-1.7244
Cc05_g11660	GSCOC_T00021286001	Uncharacterized exonuclease domain-containing At3g15140	-1.72331
Cc09_g02660	GSCOC_T00017646001	G-type lectin S-receptor-like serine threonine- kinase At1g11303	-1.72317
Cc01_g04580	GSCOC_T00041188001	Uncharacterized protein	-1.71767
Cc06_g07190	GSCOC_T00031295001	Periplasmic beta-glucosidase	-1.71509
Cc03_g01590	GSCOC_T00025774001	GAMETE EXPRESSED 2	-1.7132
Cc06_g10410	GSCOC_T00041782001	E3 ubiquitin- ligase RING1	-1.71179
Cc04_g11740	GSCOC_T00037379001	Primary amine oxidase	-1.71093
Cc04_g08000	GSCOC_T00022647001	Pentatricopeptide repeat-containing At1g18485	-1.70983
Cc06_g17920	GSCOC_T00040384001	Uncharacterized protein	-1.70815
Cc11_g15760	GSCOC_T00038094001	Uncharacterized protein	-1.70765
Cc02_g16570	GSCOC_T00014150001	Uncharacterized protein	-1.70718
Cc10_g12660	GSCOC_T00031985001	translocase subunit chloroplastic	-1.7019
Cc07_g06840	GSCOC_T00040009001	Endoribonuclease Dicer homolog 3a	-1.70126
Cc02_g13100	GSCOC_T00029201001	Pentatricopeptide repeat-containing chloroplastic	-1.69874
Cc02_g16090	GSCOC_T00014084001	Monothiol glutaredoxin-S2	-1.69758
Cc06_g02660	GSCOC_T00023525001	Uncharacterized protein	-1.69577
Cc10_g08480	GSCOC_T00034383001	UDP-glycosyltransferase 91C1	-1.69508
Cc03_g07510	GSCOC_T00026604001	Naringeni	-1.693
Cc07_g01550	GSCOC_T00039327001	SUPPRESSOR OF GAMMA RESPONSE 1	-1.68765
Cc03_g13140	GSCOC_T00030596001	Ribonuclease J	-1.6872
Cc00_g03300	GSCOC_T00011599001	disease resistance RPP13 1	-1.68703
Cc00_g12990	GSCOC_T00006487001	Zinc finger CCCH domain-containing 66	-1.68681
Cc01_g13250	GSCOC_T00028289001	Two-component response regulator ARR1	-1.68611
Cc05_g11140	GSCOC_T00021353001	Epidermis-specific secreted glyco EP1	-1.68437
Cc02_g25300	GSCOC_T00028766001	Uncharacterized protein	-1.67895
Cc03_g02390	GSCOC_T00025882001	Tubby-like F-box 6	-1.67717
Cc05_g10720	GSCOC_T00021404001	B-box zinc finger 22	-1.677
Cc07_g05500	GSCOC_T00039823001	Protease 2	-1.67604
Cc05_g13920	GSCOC_T00020999001	Transcription factor GAMYB	-1.67128
Cc05_g12450	GSCOC_T00021190001	Beta-glucosidase 18	-1.67089
Cc09_g01980	GSCOC_T00017739001	Ribulose-	-1.67043
Cc00_g24870	GSCOC_T00011617001	disease resistance RGA4	-1.67027
Cc02_g12050	GSCOC_T00029337001	G-type lectin S-receptor-like serine threonine- kinase SD1-1	-1.66881
Cc02_g34170	GSCOC_T00000653001	Heparan-alpha-glucosaminide N-acetyltransferase	-1.66773
Cc07_g14480	GSCOC_T00036610001	Magnesium-transporting P-type 1	-1.66684
Cc01_g18050	GSCOC_T00016250001	Long-chain-alcohol oxidase FAO2	-1.66526
Cc05_g10820	GSCOC_T00021394001	Probable leucine-rich repeat receptor-like serine threonine- kinase At3g14840	-1.66406
Cc04_g14560	GSCOC_T00040705001	L-type lectin-domain containing receptor kinase	-1.66176
Cc01_g13580	GSCOC_T00028328001	17.5 kDa class I heat shock	-1.65447
Cc01_g11810	GSCOC_T00028092001	Choline chloroplastic	-1.65347
Cc04_g15160	GSCOC_T00002601001	Pentatricopeptide repeat-containing At5g61400	-1.65014
Cc07_g13860	GSCOC_T00036686001	Uncharacterized protein	-1.64814
Cc04_g15590	GSCOC_T00042332001	NRT1 PTR FAMILY	-1.64773
Cc05_g12620	GSCOC_T00021165001	Uncharacterized protein	-1.64722
Cc10_g07310	GSCOC_T00034539001	pumilio homolog chloroplastic	-1.64687
Cc07_g00200	GSCOC_T00019084001	Zinc finger CONSTANS-LIKE 7	-1.64203
Cc10_g10740	GSCOC_T00019401001	Uncharacterized protein	-1.64059
Cc07_g09120	GSCOC_T00040308001	Anthocyanidin 3-O-glucosyltransferase 5	-1.6397
Cc01_g03890	GSCOC_T00040898001	Uncharacterized protein	-1.63875
Cc08_g07210	GSCOC_T00025335001	Pentatricopeptide repeat-containing At3g06920	-1.6386
Cc01_g09300	GSCOC_T00023981001	Uncharacterized protein	-1.63635
Cc09_g03570	GSCOC_T00017531001	Pentatricopeptide repeat-containing mitochondrial	-1.63617
Cc06_g03050	GSCOC_T00023576001	Type IV inositol polyphosphate 5-phosphatase 6	-1.6359
Cc06_g12890	GSCOC_T00041479001	Uncharacterized protein	-1.63563
Cc01_g00770	GSCOC_T00011072001	Uncharacterized protein	-1.63259
Cc06_g14530	GSCOC_T00041246001	Uncharacterized protein	-1.62721
Cc09_g04950	GSCOC_T00007065001	DNA topoisomerase 1	-1.62537
Cc00_g17920	GSCOC_T00008100001	Probable phosphate dikinase regulatory chloroplastic	-1.62096
Cc11_g13170	GSCOC_T00032216001	Probable E3 ubiquitin- ligase HERC1	-1.6197
Cc03_g06720	GSCOC_T00026489001	Uncharacterized protein	-1.61963
Cc00_g11330	GSCOC_T00007152001	Bark storage A	-1.61754
Cc02_g25840	GSCOC_T00028691001	Ribose-phosphate pyrophosphokinase chloroplastic	-1.61665
Cc09_g01840	GSCOC_T00017756001	15.4 kDa class V heat shock	-1.61621
Cc01_g15820	GSCOC_T00016514001	UDP-glycosyltransferase 74F2	-1.61555
Cc11_g11820	GSCOC_T00032394001	Fructokinase-2	-1.61405
Cc04_g04330	GSCOC_T00022157001	Methyl- -binding domain-containing 10	-1.6104
Cc06_g13170	GSCOC_T00041436001	VERNALIZATION INSENSITIVE 3	-1.60905
Cc05_g10910	GSCOC_T00021383001	Uncharacterized protein	-1.60771
Cc02_g07970	GSCOC_T00029869001	Heat shock cognate 70 kDa	-1.60311
Cc05_g12440	GSCOC_T00021191001	Probable inactive beta-glucosidase 14	-1.60277
Cc02_g04950	GSCOC_T00038987001	Pentatricopeptide repeat-containing chloroplastic	-1.60231
Cc02_g20560	GSCOC_T00014670001	Uncharacterized protein	-1.59976
Cc07_g14350	GSCOC_T00036625001	Zinc-finger homeodomain 2	-1.59922
Cc03_g00820	GSCOC_T00025679001	Uncharacterized protein	-1.59641
Cc02_g32490	GSCOC_T00001239001	disease resistance RGA3	-1.59482
Cc06_g13110	GSCOC_T00041445001	Uncharacterized protein	-1.59426
Cc07_g14730	GSCOC_T00036574001	6-hydroxynicotinate 3-monooxygenase	-1.59329
Cc11_g11640	GSCOC_T00032419001	Cytochrome P450 734A1	-1.59291
Cc03_g12610	GSCOC_T00015192001	Cytochrome P450 704C1	-1.59043
Cc02_g35900	GSCOC_T00042775001	Pentatricopeptide repeat-containing chloroplastic	-1.58886
Cc08_g05580	GSCOC_T00024337001	B3 domain-containing Os04g0386900	-1.58841
Cc00_g27110	GSCOC_T00012787001	Uncharacterized protein	-1.5883
Cc09_g02330	GSCOC_T00017690001	Two-component response regulator-like PRR37	-1.58564
Cc07_g12190	GSCOC_T00036911001	WD repeat-containing 55	-1.58343
Cc07_g05710	GSCOC_T00039851001	Serine threonine- kinase SRK2E	-1.58024
Cc04_g02360	GSCOC_T00021907001	Inositol oxygenase 1	-1.57938
Cc02_g15780	GSCOC_T00014039001	Heat stress transcription factor A-4a	-1.57807
Cc08_g10650	GSCOC_T00027037001	Pentatricopeptide repeat-containing chloroplastic	-1.57782
Cc07_g07660	GSCOC_T00040120001	Uncharacterized protein	-1.5698
Cc07_g06720	GSCOC_T00039993001	Sigma factor regulation	-1.56821
Cc10_g14260	GSCOC_T00012016001	Pathogen-related	-1.56731
Cc08_g07970	GSCOC_T00007309001	Uncharacterized protein	-1.5656
Cc07_g11850	GSCOC_T00036948001	Cancer-related nucleoside-triphosphatase homolog	-1.56497
Cc05_g10150	GSCOC_T00021495001	Probable glutathione S-transferase	-1.56384
Cc09_g02240	GSCOC_T00017702001	Uncharacterized protein	-1.56293
Cc06_g07600	GSCOC_T00031241001	Uncharacterized protein	-1.55854
Cc10_g12150	GSCOC_T00031906001	Kinesin-related 11	-1.55824
Cc03_g15660	GSCOC_T00026858001	NADPH-dependent oxidoreductase 2-alkenal reductase	-1.5539
Cc01_g14150	GSCOC_T00028406001	RING-H2 finger ATL48	-1.55179
Cc06_g18190	GSCOC_T00040424001	Uncharacterized protein	-1.55118
Cc06_g23540	GSCOC_T00040555001	Organic cation carnitine transporter 7	-1.55056
Cc01_g04250	GSCOC_T00039303001	APO mitochondrial	-1.55055
Cc09_g03030	GSCOC_T00017598001	Uncharacterized protein	-1.54939
Cc02_g14500	GSCOC_T00013861001	Hexose carrier HEX6	-1.5488
Cc07_g00010	GSCOC_T00019063001	tRNA pseudouridine synthase B	-1.54869
Cc02_g13720	GSCOC_T00029109001	Pentatricopeptide repeat-containing chloroplastic	-1.54752
Cc07_g13870	GSCOC_T00036685001	Methylmalonate-semialdehyde dehydrogenas	-1.54727
Cc00_g01750	GSCOC_T00002840001	Uncharacterized protein	-1.54662
Cc01_g18700	GSCOC_T00016166001	Histone H1	-1.54661
Cc07_g13730	GSCOC_T00036702001	Probable mannitol dehydrogenase	-1.54638
Cc08_g12360	GSCOC_T00030494001	Auxin-induced 5NG4	-1.54369
Cc10_g05960	GSCOC_T00034731001	Pentatricopeptide repeat-containing chloroplastic	-1.54143
Cc08_g04190	GSCOC_T00034231001	Topless-related 2	-1.54124
Cc00_g12460	GSCOC_T00005353001	Deacetoxyvindoline 4-hydroxylase	-1.54122
Cc08_g09320	GSCOC_T00017280001	NRT1 PTR FAMILY	-1.53853
Cc09_g00260	GSCOC_T00017969001	U-box domain-containing 33	-1.53672
Cc01_g02570	GSCOC_T00009679001	F-box kelch-repeat At2g44130	-1.53653
Cc09_g06410	GSCOC_T00011304001	Cytochrome P450 71A1	-1.53425
Cc07_g15290	GSCOC_T00036497001	Uncharacterized protein	-1.53271
Cc06_g15460	GSCOC_T00030820001	Acidic mammalian chitinase	-1.52852
Cc10_g10080	GSCOC_T00031458001	Multiple C2 and transmembrane domain-containing 1	-1.52798
Cc02_g15910	GSCOC_T00014058001	Probable LRR receptor-like serine threonine- kinase RFK1	-1.52581
Cc04_g04050	GSCOC_T00022122001	WD repeat-containing 43	-1.52513
Cc06_g10370	GSCOC_T00041788001	NADP-dependent malic enzyme	-1.52342
Cc08_g08310	GSCOC_T00007236001	Pentatricopeptide repeat-containing chloroplastic	-1.52299
Cc02_g14510	GSCOC_T00013862001	Pentatricopeptide repeat-containing mitochondrial	-1.52297
Cc08_g16680	GSCOC_T00035636001	Uncharacterized protein	-1.52169
Cc02_g12980	GSCOC_T00029214001	Bifunctional epoxide hydrolase 2	-1.51916
Cc03_g01890	GSCOC_T00025818001	Isoleucine--tRNA ligase	-1.51785
Cc00_g11580	GSCOC_T00007370001	Uncharacterized protein	-1.51781
Cc06_g05600	GSCOC_T00043118001	Zinc finger A20 and AN1 domain-containing stress-associated 6	-1.51693
Cc10_g01610	GSCOC_T00024644001	E3 ubiquitin- ligase LIN-1	-1.51547
Cc01_g21070	GSCOC_T00005025001	GTP pyrophosphokinase	-1.51326
Cc00_g10570	GSCOC_T00001818001	Mitochondrial thiamine pyrophosphate carrier	-1.5121
Cc11_g05120	GSCOC_T00020452001	G-type lectin S-receptor-like serine threonine- kinase At4g27290	-1.51052
Cc00_g00280	GSCOC_T00036106001	Uncharacterized protein At4g15970	-1.50891
Cc05_g11180	GSCOC_T00021348001	Phosphoenolpyruvate carboxylase	-1.50773
Cc08_g11610	GSCOC_T00027165001	Pentatricopeptide repeat-containing mitochondrial	-1.50696
Cc02_g27360	GSCOC_T00025066001	30S ribosomal chloroplastic	-1.5061
Cc00_g17510	GSCOC_T00000103001	Uncharacterized protein	-1.50251
Cc00_g22550	GSCOC_T00011312001	Cyclin-dependent kinase C-1	-1.50195
Cc00_g16190	GSCOC_T00013150001	Uncharacterized protein	-1.50079
Cc10_g09700	GSCOC_T00031511001	NRT1 PTR FAMILY	-1.4989
Cc05_g10480	GSCOC_T00021435001	Secologanin synthase	-1.49853
Cc00_g25490	GSCOC_T00000226001	8-hydroxyquercetin 8-O-methyltransferase	-1.498
Cc02_g02820	GSCOC_T00020150001	Palmitoleoyl- carboxylesterase NOTUM	-1.49768
Cc08_g07740	GSCOC_T00011862001	Uncharacterized protein	-1.49696
Cc01_g10140	GSCOC_T00024095001	RING-H2 finger ATL11	-1.49615
Cc05_g15540	GSCOC_T00038678001	Probable amino acid permease 7	-1.49527
Cc10_g06290	GSCOC_T00034680001	Uncharacterized oxidoreductase ORF334	-1.49526
Cc08_g13150	GSCOC_T00030376001	Cytochrome P450 76C2	-1.49351
Cc00_g16120	GSCOC_T00000993001	CST complex subunit CTC1	-1.49265
Cc02_g28910	GSCOC_T00018191001	Serine carboxypeptidase-like 40	-1.49222
Cc08_g12240	GSCOC_T00030508001	Inositol 2-dehydrogenase	-1.4913
Cc04_g12290	GSCOC_T00005279001	DEAD-box ATP-dependent RNA helicase 50	-1.49038
Cc05_g00770	GSCOC_T00013168001	Acidic endochitinase	-1.48851
Cc06_g14270	GSCOC_T00041278001	Uncharacterized protein	-1.48724
Cc08_g08290	GSCOC_T00007239001	domain-containing chloroplastic	-1.48654
Cc01_g11410	GSCOC_T00024270001	Auxin response factor 15	-1.4851
Cc11_g02630	GSCOC_T00025555001	Uncharacterized protein	-1.48464
Cc01_g14280	GSCOC_T00028424001	serine threonine- kinase CCR3	-1.48288
Cc05_g07650	GSCOC_T00016761001	Uncharacterized protein	-1.48078
Cc04_g06240	GSCOC_T00022407001	Zinc finger chloroplastic	-1.48065
Cc07_g07420	GSCOC_T00040091001	Squalene monooxygenase	-1.47878
Cc05_g10600	GSCOC_T00021422001	Uncharacterized protein	-1.47732
Cc06_g03970	GSCOC_T00023698001	29 kDa ribonucleo chloroplastic	-1.47717
Cc02_g22040	GSCOC_T00014860001	Pentatricopeptide repeat-containing mitochondrial	-1.47587
Cc02_g03630	GSCOC_T00020253001	Carboxylesterase 1	-1.47516
Cc00_g11810	GSCOC_T00007743001	Uncharacterized protein	-1.47353
Cc06_g13380	GSCOC_T00041407001	Zinc finger 2	-1.47352
Cc02_g27350	GSCOC_T00025065001	Uncharacterized protein	-1.47293
Cc03_g09950	GSCOC_T00030988001	Probable aldo-keto reductase 2	-1.47157
Cc00_g14900	GSCOC_T00008042001	DNA annealing helicase and endonuclease ZRANB3	-1.47119
Cc03_g00350	GSCOC_T00025614001	Inositol transporter 4	-1.46817
Cc08_g03870	GSCOC_T00034184001	Disease resistance RPM1	-1.4675
Cc01_g16290	GSCOC_T00016459001	Cysteine-rich repeat secretory 55	-1.46714
Cc07_g19870	GSCOC_T00033886001	Uncharacterized protein At5g08430	-1.46713
Cc03_g05050	GSCOC_T00026242001	Cellulose synthase G2	-1.46396
Cc04_g04640	GSCOC_T00022196001	Uncharacterized protein	-1.46159
Cc01_g13730	GSCOC_T00028350001	Uncharacterized protein	-1.46036
Cc09_g02400	GSCOC_T00017683001	Uncharacterized protein YKR070W	-1.45601
Cc08_g01290	GSCOC_T00038406001	Polyamine aminopropyltransferase	-1.45585
Cc05_g02320	GSCOC_T00001628001	UDP-glucose flavonoid 3-O-glucosyltransferase 6	-1.45512
Cc04_g04650	GSCOC_T00022197001	COBW domain-containing 2	-1.45469
Cc06_g18450	GSCOC_T00040461001	Polyadenylate-binding -interacting 2	-1.45412
Cc04_g15990	GSCOC_T00042389001	HIPL2	-1.45302
Cc06_g08040	GSCOC_T00031181001	Uncharacterized protein	-1.45282
Cc02_g31530	GSCOC_T00027543001	Uncharacterized protein	-1.452
Cc00_g29390	GSCOC_T00008189001	Glycinin G3	-1.45198
Cc07_g13100	GSCOC_T00036793001	Ethylene-responsive transcription factor 1B	-1.45115
Cc07_g01070	GSCOC_T00019192001	Serine threonine- kinase PBS1	-1.4502
Cc11_g16360	GSCOC_T00038174001	Small heat shock chloroplastic	-1.44961
Cc06_g21620	GSCOC_T00001545001	Zinc finger chloroplastic	-1.44885
Cc08_g08480	GSCOC_T00009041001	DNA polymerase theta	-1.44869
Cc01_g15920	GSCOC_T00016503001	pentatricopeptide repeat-containing chloroplastic	-1.44795
Cc10_g11960	GSCOC_T00031875001	Uncharacterized protein	-1.44767
Cc04_g12550	GSCOC_T00005319001	LRR receptor-like serine threonine- kinase	-1.44744
Cc03_g09380	GSCOC_T00042677001	Probable acyl-activating enzyme chloroplastic	-1.44669
Cc00_g01610	GSCOC_T00002721001	Succinate dehydrogenase cytochrome b560 subunit	-1.44655
Cc04_g03880	GSCOC_T00022103001	Uncharacterized protein	-1.44577
Cc08_g01370	GSCOC_T00038397001	Pentatricopeptide repeat-containing At5g39710	-1.44282
Cc08_g15870	GSCOC_T00035531001	Hydroquinone glucosyltransferase	-1.44273
Cc06_g16990	GSCOC_T00004156001	pentatricopeptide repeat-containing At5g52630	-1.44257
Cc06_g09690	GSCOC_T00041882001	Uncharacterized protein	-1.44204
Cc00_g09310	GSCOC_T00008201001	RING-H2 finger ATL21A	-1.44094
Cc08_g00360	GSCOC_T00038533001	F-box FBD LRR-repeat At5g22670	-1.44091
Cc03_g07620	GSCOC_T00026617001	Uncharacterized protein	-1.44084
Cc01_g15300	GSCOC_T00016580001	Transcription factor RF2b	-1.44076
Cc02_g25780	GSCOC_T00028699001	Uncharacterized protein	-1.44068
Cc06_g15370	GSCOC_T00030837001	Two-component response regulator ARR12	-1.43923
Cc06_g03310	GSCOC_T00023611001	Pentatricopeptide repeat-containing chloroplastic	-1.43912
Cc11_g02090	GSCOC_T00033028001	Uncharacterized protein	-1.43911
Cc00_g29570	GSCOC_T00008662001	Glutamate dehydrogenase	-1.43878
Cc02_g20170	GSCOC_T00014622001	Serine threonine- kinase TOR	-1.43706
Cc00_g08760	GSCOC_T00003176001	Pentatricopeptide repeat-containing At1g71420	-1.43501
Cc00_g35200	GSCOC_T00004588001	Uncharacterized protein	-1.43414
Cc09_g02070	GSCOC_T00017724001	Tyrosine-specific transport	-1.43332
Cc02_g13680	GSCOC_T00029115001	Ethylene-responsive transcription factor 12	-1.43085
Cc00_g19230	GSCOC_T00011837001	Blue copper	-1.42993
Cc00_g05690	GSCOC_T00011954001	amidase	-1.42843
Cc11_g03440	GSCOC_T00040783001	Chaperone	-1.42762
Cc02_g25290	GSCOC_T00028767001	Uncharacterized protein	-1.42712
Cc02_g26310	GSCOC_T00028622001	Pentatricopeptide repeat-containing chloroplastic	-1.42411
Cc02_g08110	GSCOC_T00029845001	Methionine--tRNA ligase	-1.42357
Cc02_g10380	GSCOC_T00029535001	Bark storage A	-1.42268
Cc02_g22530	GSCOC_T00014926001	Pentatricopeptide repeat-containing chloroplastic	-1.42264
Cc05_g14590	GSCOC_T00038800001	Uncharacterized protein	-1.42256
Cc07_g05830	GSCOC_T00039865001	Oxidoreductase	-1.42195
Cc00_g17910	GSCOC_T00008097001	Gibberellin 2-beta-dioxygenase 8	-1.42117
Cc06_g17180	GSCOC_T00036348001	Uncharacterized protein	-1.42032
Cc08_g04050	GSCOC_T00034209001	Calcium permeable stress-gated cation channel 1	-1.41887
Cc05_g00760	GSCOC_T00013166001	Acidic endochitinase	-1.4188
Cc10_g13310	GSCOC_T00035315001	Pentatricopeptide repeat-containing At3g26540	-1.41846
Cc01_g16740	GSCOC_T00016405001	Oleoyl-acyl carrier chloroplastic (Fragment)	-1.41839
Cc11_g08250	GSCOC_T00032902001	Uncharacterized protein	-1.41755
Cc11_g11360	GSCOC_T00032454001	Transcription factor bHLH49	-1.41723
Cc04_g10440	GSCOC_T00042593001	Uncharacterized protein	-1.41562
Cc01_g10720	GSCOC_T00024178001	isCO large subunit-binding subunit chloroplastic	-1.41507
Cc00_g11140	GSCOC_T00009400001	disease resistance RGA4	-1.41282
Cc02_g18380	GSCOC_T00014379001	Uncharacterized protein	-1.41213
Cc06_g03880	GSCOC_T00023685001	Serine threonine- kinase CCR2	-1.41163
Cc01_g05020	GSCOC_T00028586001	Uncharacterized protein	-1.41106
Cc09_g01710	GSCOC_T00017773001	Uncharacterized protein	-1.41017
Cc09_g02740	GSCOC_T00017635001	Pentatricopeptide repeat-containing At5g39710	-1.40866
Cc07_g00250	GSCOC_T00019091001	Very-long-chain 3-oxoacyl- reductase	-1.408
Cc02_g25420	GSCOC_T00028748001	Cytochrome P450 734A1	-1.40592
Cc02_g23880	GSCOC_T00015092001	ABC transporter G family member 11	-1.40591
Cc08_g14680	GSCOC_T00030194001	Tubulin beta-2 chain	-1.40583
Cc05_g01880	GSCOC_T00015778001	GEM 5	-1.40534
Cc04_g11190	GSCOC_T00037282001	Cytochrome P450 71A1	-1.40482
Cc02_g25630	GSCOC_T00028724001	Uncharacterized protein	-1.40319
Cc02_g29450	GSCOC_T00018369001	tRNA uridine 5-carboxymethylaminomethyl modification enzyme	-1.40286
Cc01_g13760	GSCOC_T00028354001	Alpha-glucan H isozyme	-1.4019
Cc01_g11460	GSCOC_T00024276001	Uncharacterized protein	-1.40158
Cc00_g16400	GSCOC_T00011388001	(+)-neomenthol dehydrogenase	-1.40157
Cc00_g01660	GSCOC_T00002755001	Uncharacterized protein	-1.40073
Cc06_g08550	GSCOC_T00031117001	Pentatricopeptide repeat-containing At5g48910	-1.39899
Cc07_g16810	GSCOC_T00037516001	Pentatricopeptide repeat-containing mitochondrial	-1.39838
Cc08_g04330	GSCOC_T00034255001	Isoflavone reductase homolog	-1.39699
Cc10_g01560	GSCOC_T00024633001	Thaumatin 1	-1.39673
Cc04_g03740	GSCOC_T00022073001	Pleiotropic drug resistance 1	-1.39611
Cc02_g37250	GSCOC_T00028018001	Serine arginine-rich splicing factor RS41	-1.39505
Cc10_g02510	GSCOC_T00024755001	Uncharacterized protein	-1.39435
Cc07_g10800	GSCOC_T00037070001	Uncharacterized protein	-1.39399
Cc08_g12570	GSCOC_T00030464001	Uncharacterized protein	-1.39388
Cc03_g11010	GSCOC_T00042051001	Pentatricopeptide repeat-containing At4g02750	-1.39153
Cc01_g00780	GSCOC_T00011073001	Transcription repressor MYB5	-1.39043
Cc04_g10340	GSCOC_T00042581001	Oxygen-independent coproporphyrinogen-III oxidase sll1917	-1.39004
Cc00_g35360	GSCOC_T00006432001	ABC transporter A family member 7	-1.38964
Cc01_g16460	GSCOC_T00016438001	mRNA-capping enzyme	-1.38956
Cc11_g04890	GSCOC_T00042931001	late blight resistance homolog R1A-6	-1.38879
Cc11_g10430	GSCOC_T00032580001	NRT1 PTR FAMILY	-1.38871
Cc05_g08390	GSCOC_T00016860001	F-box LRR-repeat MAX2 homolog	-1.38657
Cc06_g04570	GSCOC_T00042969001	Phosphatidylinositol 4-phosphate 5-kinase 9	-1.38636
Cc04_g13710	GSCOC_T00035876001	40S ribosomal S6	-1.38624
Cc02_g35470	GSCOC_T00042845001	Inactive glucose-6-phosphate 1-dehydrogenase chloroplastic	-1.38477
Cc00_g15490	GSCOC_T00000734001	Uncharacterized protein	-1.38302
Cc09_g06810	GSCOC_T00005139001	Fe(2+) transport 1	-1.38296
Cc07_g00550	GSCOC_T00019133001	Actin-histidine N-methyltransferase	-1.38079
Cc09_g09400	GSCOC_T00023053001	Pentatricopeptide repeat-containing mitochondrial	-1.37889
Cc09_g10120	GSCOC_T00041089001	Subtilisin-like protease	-1.37721
Cc03_g15580	GSCOC_T00026847001	Pentatricopeptide repeat-containing At5g27270	-1.3767
Cc01_g04690	GSCOC_T00015816001	Uncharacterized protein	-1.37601
Cc08_g04170	GSCOC_T00034229001	TOPLESS	-1.37583
Cc02_g11980	GSCOC_T00029347001	Uncharacterized protein	-1.37575
Cc05_g12840	GSCOC_T00021137001	Uncharacterized protein	-1.37567
Cc06_g16610	GSCOC_T00030660001	Probable glucuronoxylan glucuronosyltransferase F8H	-1.37555
Cc06_g01580	GSCOC_T00023381001	FLUORESCENT IN BLUE chloroplastic	-1.37388
Cc04_g14730	GSCOC_T00040735001	disease resistance RPP13 1	-1.37285
Cc11_g12600	GSCOC_T00032294001	ARF guanine-nucleotide exchange factor GNOM	-1.37264
Cc07_g13480	GSCOC_T00036732001	Uncharacterized protein	-1.3725
Cc02_g11990	GSCOC_T00029345001	G-type lectin S-receptor-like serine threonine- kinase B120	-1.37157
Cc01_g13830	GSCOC_T00028365001	NRT1 PTR FAMILY	-1.36921
Cc05_g07640	GSCOC_T00016760001	Uncharacterized protein	-1.36879
Cc03_g10250	GSCOC_T00031035001	Transcription factor bHLH128	-1.3675
Cc04_g02740	GSCOC_T00021952001	Uncharacterized isomerase BH0283	-1.36732
Cc01_g21540	GSCOC_T00004968001	Uncharacterized protein	-1.36711
Cc03_g03000	GSCOC_T00025975001	Endo-	-1.36519
Cc05_g11380	GSCOC_T00021325001	tRNA dimethylallyltransferase 9	-1.36425
Cc01_g09430	GSCOC_T00023995001	Pentatricopeptide repeat-containing At2g27610	-1.36397
Cc02_g34140	GSCOC_T00000650001	Tafazzin	-1.36374
Cc05_g06520	GSCOC_T00042143001	Pentatricopeptide repeat-containing At1g73710	-1.36257
Cc06_g21270	GSCOC_T00018123001	4-alpha-glucanotransferase DPE2	-1.36201
Cc08_g05750	GSCOC_T00024364001	Uncharacterized protein	-1.35927
Cc04_g11810	GSCOC_T00037390001	pentatricopeptide repeat-containing At1g64310	-1.35881
Cc03_g06280	GSCOC_T00026418001	Pentatricopeptide repeat-containing mitochondrial	-1.3575
Cc04_g06850	GSCOC_T00022485001	Uncharacterized protein	-1.35655
Cc00_g16340	GSCOC_T00012371001	Uncharacterized protein	-1.3561
Cc02_g23780	GSCOC_T00015081001	Pentatricopeptide repeat-containing At1g14470	-1.3557
Cc01_g20590	GSCOC_T00015914001	Pentatricopeptide repeat-containing At5g66520	-1.35438
Cc02_g19310	GSCOC_T00014496001	Triacylglycerol lipase 1	-1.35374
Cc05_g01990	GSCOC_T00040825001	Zinc finger CONSTANS-LIKE 10	-1.35356
Cc08_g02650	GSCOC_T00037746001	Probable carboxylesterase 120	-1.35317
Cc04_g06520	GSCOC_T00022441001	Pentatricopeptide repeat-containing At4g02750	-1.35105
Cc07_g08560	GSCOC_T00040234001	Non-specific lipid-transfer 2	-1.35014
Cc07_g02650	GSCOC_T00039466001	Chloroplastic group IIA intron splicing facilitator chloroplastic	-1.34948
Cc08_g14950	GSCOC_T00035412001	AT-rich interactive domain-containing 2	-1.34843
Cc00_g35510	GSCOC_T00003701001	Lysine--tRNA ligase	-1.34834
Cc08_g13160	GSCOC_T00030375001	Primary amine oxidase	-1.34764
Cc02_g39330	GSCOC_T00027730001	Clustered mitochondria homolog	-1.34749
Cc05_g03360	GSCOC_T00033547001	U5 small nuclear ribonucleo 200 kDa helicase	-1.34628
Cc00_g26700	GSCOC_T00003035001	disease resistance RGA3	-1.34627
Cc00_g15830	GSCOC_T00011228001	late blight resistance homolog R1B-17	-1.34244
Cc07_g06530	GSCOC_T00039963001	DETOXIFICATION 6	-1.34219
Cc07_g14990	GSCOC_T00036544001	Pentatricopeptide repeat-containing mitochondrial	-1.34185
Cc05_g03890	GSCOC_T00017317001	H ACA ribonucleo complex subunit 4	-1.34106
Cc02_g33970	GSCOC_T00008650001	Uncharacterized protein	-1.34024
Cc11_g13270	GSCOC_T00032203001	Transcription factor PRE3	-1.33961
Cc08_g14030	GSCOC_T00030273001	Transcriptional corepressor SEUSS	-1.33945
Cc07_g04030	GSCOC_T00039653001	Alpha-	-1.33735
Cc10_g06460	GSCOC_T00034653001	DEAD-box ATP-dependent RNA helicase 39	-1.33722
Cc05_g11610	GSCOC_T00021292001	Uncharacterized protein	-1.33701
Cc00_g22260	GSCOC_T00007435001	33 kDa chloroplastic	-1.33636
Cc01_g19710	GSCOC_T00016024001	Uncharacterized protein	-1.33586
Cc06_g00160	GSCOC_T00023184001	Bromodomain and PHD finger-containing 3	-1.33475
Cc06_g20150	GSCOC_T00022923001	Calmodulin-interacting 111	-1.33244
Cc06_g21080	GSCOC_T00034088001	Uncharacterized protein	-1.33033
Cc01_g09830	GSCOC_T00024052001	Uncharacterized protein	-1.32913
Cc08_g05020	GSCOC_T00042457001	Uncharacterized protein	-1.32904
Cc01_g01250	GSCOC_T00037952001	Pentatricopeptide repeat-containing At5g16860	-1.32839
Cc08_g09310	GSCOC_T00017279001	NRT1 PTR FAMILY	-1.32834
Cc08_g01190	GSCOC_T00038420001	Glyoxylate reductase	-1.32735
Cc03_g13610	GSCOC_T00031705001	L-type lectin-domain containing receptor kinase	-1.32733
Cc09_g06120	GSCOC_T00033360001	Pentatricopeptide repeat-containing At4g19890	-1.32709
Cc03_g02920	GSCOC_T00025964001	chloroplastic	-1.32704
Cc01_g00500	GSCOC_T00011029001	50S ribosomal chloroplastic	-1.327
Cc08_g01240	GSCOC_T00038414001	Trihelix transcription factor GT-2	-1.32689
Cc01_g08200	GSCOC_T00015513001	Probable leucine-rich repeat receptor kinase At5g49770	-1.32491
Cc07_g20610	GSCOC_T00007209001	Subtilisin-like protease	-1.32449
Cc02_g19320	GSCOC_T00014497001	Methylthioribose kinase	-1.32334
Cc07_g04080	GSCOC_T00039658001	Chaperone chloroplastic	-1.32155
Cc05_g06320	GSCOC_T00042117001	pentatricopeptide repeat-containing At1g03510	-1.32127
Cc00_g29690	GSCOC_T00010530001	NRT1 PTR FAMILY	-1.3201
Cc08_g06200	GSCOC_T00040971001	Histidine kinase 5	-1.31785
Cc06_g11590	GSCOC_T00041639001	Uncharacterized protein	-1.31723
Cc07_g07130	GSCOC_T00040050001	Pentatricopeptide repeat-containing chloroplastic	-1.31613
Cc02_g05700	GSCOC_T00039085001	Transcription factor bHLH61	-1.31556
Cc05_g12700	GSCOC_T00021157001	Unconventional myosin-Va	-1.31531
Cc04_g02900	GSCOC_T00021973001	Pentatricopeptide repeat-containing At1g62350	-1.31475
Cc04_g08460	GSCOC_T00022705001	Plastid division chloroplastic	-1.31422
Cc09_g05200	GSCOC_T00007094001	GTP-binding ERG	-1.31371
Cc02_g23890	GSCOC_T00015093001	transport Sec1a	-1.31327
Cc06_g10660	GSCOC_T00041751001	Derlin-1	-1.31188
Cc07_g15860	GSCOC_T00036417001	Pentatricopeptide repeat-containing At3g53170	-1.31175
Cc04_g09030	GSCOC_T00022780001	Mitochondrial import inner membrane translocase subunit TIM14	-1.31156
Cc11_g12400	GSCOC_T00032321001	Pentatricopeptide repeat-containing mitochondrial	-1.30969
Cc00_g10400	GSCOC_T00011006001	pentatricopeptide repeat-containing At3g15130	-1.30837
Cc10_g05420	GSCOC_T00034807001	Cytochrome P450 81D1	-1.30746
Cc00_g28410	GSCOC_T00003307001	F-box LRR-repeat MAX2 homolog	-1.30676
Cc05_g14770	GSCOC_T00038781001	Cytochrome P450 71D10	-1.30643
Cc11_g15240	GSCOC_T00038031001	Uncharacterized protein	-1.30602
Cc02_g31670	GSCOC_T00027514001	Uncharacterized protein	-1.30576
Cc10_g15270	GSCOC_T00033702001	GIGANTEA	-1.30524
Cc03_g02330	GSCOC_T00025875001	Double-stranded RNA-binding 2	-1.30228
Cc01_g14100	GSCOC_T00028399001	Pentatricopeptide repeat-containing chloroplastic	-1.30215
Cc11_g10800	GSCOC_T00032528001	Nudix hydrolase 1	-1.30165
Cc05_g15660	GSCOC_T00038661001	Pentatricopeptide repeat-containing At5g56310	-1.30085
Cc00_g10230	GSCOC_T00006743001	Gibberellin 3-beta-dioxygenase 4	-1.3001
Cc06_g04360	GSCOC_T00042945001	Probable xyloglucan endotransglucosylase hydrolase 32	-1.29753
Cc03_g09800	GSCOC_T00030970001	Probable aldo-keto reductase 2	-1.29605
Cc05_g13790	GSCOC_T00021017001	CRS2-associated factor mitochondrial	-1.29575
Cc08_g05050	GSCOC_T00042454001	pentatricopeptide repeat-containing At1g31840	-1.2933
Cc04_g12390	GSCOC_T00005298001	Uncharacterized protein	-1.29134
Cc05_g06860	GSCOC_T00042201001	Probable polyol transporter 4	-1.28926
Cc02_g18330	GSCOC_T00014373001	Naringeni	-1.28899
Cc03_g07590	GSCOC_T00026614001	Uncharacterized protein	-1.28855
Cc05_g08220	GSCOC_T00016839001	Transcription factor AIG1	-1.28688
Cc07_g13400	GSCOC_T00036741001	Uncharacterized protein	-1.28553
Cc01_g13610	GSCOC_T00028334001	Mitochondrial import inner membrane translocase subunit TIM10	-1.2842
Cc00_g29600	GSCOC_T00002220001	Cellulose synthase B6	-1.28307
Cc08_g12350	GSCOC_T00030495001	pentatricopeptide repeat-containing At5g47460	-1.28268
Cc06_g20280	GSCOC_T00022950001	Peptidyl-prolyl cis-trans isomerase FKBP65	-1.2825
Cc04_g02090	GSCOC_T00021876001	Proline-rich receptor kinase PERK13	-1.28211
Cc09_g03090	GSCOC_T00017590001	pentatricopeptide repeat-containing At1g09680	-1.28167
Cc08_g07260	GSCOC_T00025341001	Pentatricopeptide repeat-containing At2g02750	-1.28079
Cc00_g21510	GSCOC_T00008527001	UDP-glucose flavonoid 3-O-glucosyltransferase 6	-1.27878
Cc11_g15660	GSCOC_T00038084001	DETOXIFICATION 41	-1.27713
Cc07_g14490	GSCOC_T00036609001	Probable glucan	-1.27697
Cc02_g28360	GSCOC_T00025213001	Pentatricopeptide repeat-containing At3g53170	-1.27676
Cc04_g13800	GSCOC_T00035887001	EXECUTER chloroplastic	-1.2767
Cc05_g01540	GSCOC_T00018247001	ATP-dependent zinc metalloprotease FTSH chloroplastic	-1.27591
Cc08_g02640	GSCOC_T00037744001	Carboxylesterase 1	-1.27584
Cc11_g13500	GSCOC_T00032174001	TWIN LOV 1	-1.27567
Cc11_g11420	GSCOC_T00032447001	Endoplasmin homolog	-1.27487
Cc02_g11640	GSCOC_T00029386001	Pentatricopeptide repeat-containing At4g21170	-1.27484
Cc06_g14880	GSCOC_T00030907001	APO chloroplastic	-1.27477
Cc02_g18460	GSCOC_T00014390001	Myb family transcription factor At1g14600	-1.27362
Cc07_g21390	GSCOC_T00016951001	ETHYLENE INSENSITIVE 3	-1.27338
Cc02_g26990	GSCOC_T00025010001	Pentatricopeptide repeat-containing At1g25360	-1.27296
Cc06_g03030	GSCOC_T00023573001	Auxin-induced 5NG4	-1.2728
Cc02_g00830	GSCOC_T00019883001	Transcription termination factor mitochondrial	-1.27272
Cc02_g02220	GSCOC_T00020070001	Pentatricopeptide repeat-containing chloroplastic	-1.27269
Cc02_g24010	GSCOC_T00015108001	Uncharacterized protein	-1.27217
Cc00_g07030	GSCOC_T00003186001	Pentatricopeptide repeat-containing At5g62370	-1.27072
Cc03_g05710	GSCOC_T00026336001	Uncharacterized protein	-1.27059
Cc11_g03900	GSCOC_T00033999001	Uncharacterized protein	-1.26922
Cc02_g31660	GSCOC_T00027515001	Uncharacterized protein	-1.26908
Cc07_g05570	GSCOC_T00039833001	Pentatricopeptide repeat-containing At2g33680	-1.26767
Cc06_g23060	GSCOC_T00040630001	Uncharacterized protein	-1.26589
Cc05_g10530	GSCOC_T00021430001	Chalcone--flavonone isomerase	-1.2657
Cc00_g30190	GSCOC_T00005084001	rRNA-processing FCF1 homolog	-1.26353
Cc05_g16000	GSCOC_T00038616001	WD repeat-containing 75	-1.26301
Cc07_g00720	GSCOC_T00019150001	Uncharacterized RNA methyltransferase pc1998	-1.26274
Cc10_g09980	GSCOC_T00031475001	Glutathione transferase GST 23	-1.26271
Cc10_g13770	GSCOC_T00035238001	Uncharacterized protein	-1.26226
Cc03_g05700	GSCOC_T00026335001	Uncharacterized protein	-1.26223
Cc06_g12010	GSCOC_T00041586001	DNA-directed RNA polymerase III subunit RPC4	-1.26198
Cc00_g01900	GSCOC_T00002988001	Uncharacterized protein	-1.26191
Cc00_g16310	GSCOC_T00008243001	RNA-dependent RNA polymerase 1	-1.26163
Cc00_g32590	GSCOC_T00011519001	Uncharacterized protein	-1.26122
Cc07_g18650	GSCOC_T00018721001	2-oxoisovalerate dehydrogenase subunit mitochondrial (Fragment)	-1.26114
Cc06_g02980	GSCOC_T00023568001	Probable histone	-1.2609
Cc07_g17550	GSCOC_T00008838001	Meiosis regulator and mRNA stability factor 1	-1.26041
Cc09_g01960	GSCOC_T00017741001	RNA pseudouridine synthase chloroplastic	-1.25959
Cc09_g10680	GSCOC_T00041016001	Uncharacterized protein	-1.25858
Cc10_g00360	GSCOC_T00024486001	Peptidyl-prolyl cis-trans isomerase chloroplastic	-1.25857
Cc02_g15180	GSCOC_T00013959001	Probable LRR receptor-like serine threonine- kinase At2g24230	-1.25799
Cc10_g08790	GSCOC_T00034340001	Pentatricopeptide repeat-containing At3g12770	-1.25753
Cc09_g01070	GSCOC_T00017861001	Ubiquinol oxidase chloroplastic chromoplastic	-1.25709
Cc01_g01720	GSCOC_T00037857001	disease resistance RGA1	-1.25611
Cc01_g04990	GSCOC_T00028576001	Uncharacterized protein	-1.25609
Cc04_g02970	GSCOC_T00021981001	PLANT CADMIUM RESISTANCE 8	-1.25599
Cc07_g12330	GSCOC_T00036888001	Uncharacterized protein	-1.25522
Cc06_g19070	GSCOC_T00028956001	Ribosomal RNA small subunit methyltransferase NEP1	-1.2551
Cc09_g02390	GSCOC_T00017684001	Uncharacterized CDP-alcohol phosphatidyltransferase class-I family	-1.25465
Cc08_g10160	GSCOC_T00026976001	Pentatricopeptide repeat-containing At4g22760	-1.25369
Cc04_g05830	GSCOC_T00022350001	Glycine--tRNA mitochondrial 1	-1.25303
Cc07_g06410	GSCOC_T00039944001	Cyclin-D3-2	-1.2529
Cc10_g02670	GSCOC_T00024773001	Uncharacterized protein	-1.25188
Cc11_g04710	GSCOC_T00042898001	Pentatricopeptide repeat-containing mitochondrial	-1.25135
Cc01_g16500	GSCOC_T00016433001	UDP-glycosyltransferase 74F2	-1.25082
Cc02_g02060	GSCOC_T00020050001	pentatricopeptide repeat-containing At3g49142	-1.25023
Cc01_g19470	GSCOC_T00016053001	Chloroplast stem-loop binding of 41 kDa chloroplastic	-1.25016
Cc01_g00100	GSCOC_T00012426001	Integrator complex subunit 3	-1.24941
Cc11_g12280	GSCOC_T00032338001	Pentatricopeptide repeat-containing At5g66520	-1.2493
Cc06_g12180	GSCOC_T00041568001	Tubulin--tyrosine ligase 12	-1.24863
Cc02_g14060	GSCOC_T00029062001	MLO 6	-1.24661
Cc02_g31290	GSCOC_T00027589001	Uncharacterized protein	-1.24616
Cc02_g00270	GSCOC_T00019803001	ATPase family AAA domain-containing 3-A	-1.24597
Cc11_g00300	GSCOC_T00019459001	vacuolar sorting-associated 13E	-1.24366
Cc02_g33170	GSCOC_T00015333001	Pentatricopeptide repeat-containing mitochondrial	-1.24306
Cc04_g04170	GSCOC_T00022137001	Uncharacterized protein At2g34160	-1.24216
Cc10_g12640	GSCOC_T00031983001	Glutamate-1-semialdehyde	-1.24173
Cc04_g09720	GSCOC_T00000093001	Uncharacterized protein	-1.24157
Cc00_g01390	GSCOC_T00010637001	L-type lectin-domain containing receptor kinase	-1.24135
Cc03_g16120	GSCOC_T00002121001	Uncharacterized protein	-1.24064
Cc06_g20290	GSCOC_T00022951001	70 kDa peptidyl-prolyl isomerase	-1.24036
Cc02_g23980	GSCOC_T00015104001	Pentatricopeptide repeat-containing chloroplastic	-1.23959
Cc11_g12670	GSCOC_T00032286001	Ribulose-	-1.23918
Cc07_g14020	GSCOC_T00036665001	U-box domain-containing 50	-1.23798
Cc07_g07340	GSCOC_T00040081001	60S ribosomal L23A	-1.23736
Cc03_g14920	GSCOC_T00026744001	Uncharacterized protein	-1.23727
Cc04_g01390	GSCOC_T00021789001	ELF4-LIKE 4	-1.23562
Cc05_g05570	GSCOC_T00035130001	Pentatricopeptide repeat-containing At3g12770	-1.2352
Cc02_g37820	GSCOC_T00027940001	Uncharacterized protein	-1.23517
Cc11_g13730	GSCOC_T00032145001	Pentatricopeptide repeat-containing mitochondrial	-1.23455
Cc06_g04170	GSCOC_T00023726001	Phosphoglycerate cytosolic	-1.23407
Cc08_g06080	GSCOC_T00024434001	Uncharacterized protein	-1.23365
Cc08_g04290	GSCOC_T00034248001	COBW domain-containing 1	-1.23353
Cc00_g25680	GSCOC_T00001556001	8-hydroxyquercetin 8-O-methyltransferase	-1.23328
Cc00_g12970	GSCOC_T00005419001	8-hydroxyquercetin 8-O-methyltransferase	-1.23054
Cc01_g12520	GSCOC_T00028190001	Histone H4	-1.23012
Cc07_g20800	GSCOC_T00027279001	late blight resistance homolog R1B-14	-1.22983
Cc05_g07420	GSCOC_T00042270001	DNA excision repair ERCC-6-like 2	-1.22959
Cc04_g15920	GSCOC_T00042382001	Pentatricopeptide repeat-containing mitochondrial	-1.22782
Cc04_g04320	GSCOC_T00022156001	Uncharacterized protein	-1.22563
Cc02_g30900	GSCOC_T00023846001	Uncharacterized protein	-1.22531
Cc01_g13270	GSCOC_T00028292001	Pentatricopeptide repeat-containing At2g27610	-1.22509
Cc10_g12680	GSCOC_T00031987001	translocase subunit chloroplastic	-1.22449
Cc00_g27660	GSCOC_T00008393001	disease resistance RGA4	-1.22447
Cc01_g13290	GSCOC_T00028294001	chloroplastic	-1.22409
Cc10_g00930	GSCOC_T00024553001	tRNA pseudouridine synthase 1	-1.22385
Cc06_g01810	GSCOC_T00023415001	Fructokinase-2	-1.22318
Cc02_g16810	GSCOC_T00014179001	Uncharacterized protein	-1.22311
Cc00_g20920	GSCOC_T00001074001	Thymidine kinase	-1.22309
Cc07_g05780	GSCOC_T00039859001	Peroxidase 10	-1.22222
Cc11_g11300	GSCOC_T00032463001	chloroplastic	-1.22065
Cc07_g00110	GSCOC_T00019073001	Methyltransferase 7B	-1.21982
Cc08_g11570	GSCOC_T00027161001	Uncharacterized hydrolase	-1.21976
Cc06_g19100	GSCOC_T00028960001	Pentatricopeptide repeat-containing mitochondrial	-1.21964
Cc02_g11570	GSCOC_T00029394001	COBRA 10	-1.21926
Cc04_g06120	GSCOC_T00022393001	Uncharacterized protein	-1.21857
Cc05_g12590	GSCOC_T00021170001	Uncharacterized protein	-1.21774
Cc05_g13430	GSCOC_T00021065001	Ethylene-responsive transcription factor ERF118	-1.21679
Cc10_g01700	GSCOC_T00024656001	Uncharacterized protein	-1.21639
Cc00_g14910	GSCOC_T00008043001	DNA annealing helicase and endonuclease ZRANB3	-1.21584
Cc01_g05000	GSCOC_T00028577001	Myb family transcription factor At1g14600	-1.21499
Cc00_g01730	GSCOC_T00002831001	Uncharacterized mitochondrial g00910	-1.21437
Cc04_g14140	GSCOC_T00035943001	Serine threonine- kinase ATM	-1.21359
Cc09_g04530	GSCOC_T00017414001	Pentatricopeptide repeat-containing At2g01860	-1.21318
Cc04_g07640	GSCOC_T00022596001	Single-stranded DNA-binding mitochondrial	-1.21191
Cc01_g03170	GSCOC_T00033154001	Probable plastid-lipid-associated chloroplastic	-1.21109
Cc05_g02380	GSCOC_T00020989001	Uncharacterized protein	-1.21058
Cc02_g21180	GSCOC_T00014755001	DNA helicase MCM9	-1.21033
Cc01_g19570	GSCOC_T00016042001	Transcription factor TT8	-1.20988
Cc08_g01710	GSCOC_T00038343001	Transducin beta 3	-1.2094
Cc04_g08920	GSCOC_T00022768001	Uncharacterized protein	-1.20927
Cc00_g00170	GSCOC_T00036093001	Trans-cinnamate 4-monooxygenase	-1.20833
Cc00_g23670	GSCOC_T00006371001	Pentatricopeptide repeat-containing mitochondrial	-1.20807
Cc11_g01810	GSCOC_T00019509001	Pentatricopeptide repeat-containing mitochondrial	-1.20799
Cc11_g15360	GSCOC_T00038046001	CRS2-associated factor chloroplastic	-1.20796
Cc02_g11710	GSCOC_T00029379001	Uncharacterized protein	-1.20606
Cc03_g02480	GSCOC_T00025894001	Pentatricopeptide repeat-containing mitochondrial	-1.2036
Cc10_g13910	GSCOC_T00035222001	Probable serine threonine- kinase CST	-1.2026
Cc05_g03210	GSCOC_T00033517001	Uncharacterized protein	-1.20249
Cc06_g06020	GSCOC_T00043172001	Indole-3-acetic acid-induced ARG7	-1.20236
Cc07_g11140	GSCOC_T00037034001	Pentatricopeptide repeat-containing At3g51320	-1.20087
Cc04_g16300	GSCOC_T00035716001	Uncharacterized protein	-1.20015
Cc00_g19990	GSCOC_T00001938001	disease resistance RGA4	-1.19975
Cc05_g12350	GSCOC_T00021201001	Ribosome biogenesis BRX1 homolog	-1.19949
Cc00_g03240	GSCOC_T00011590001	MEI2-like 2	-1.19928
Cc07_g18990	GSCOC_T00018656001	Pentatricopeptide repeat-containing mitochondrial	-1.19776
Cc05_g13240	GSCOC_T00021089001	Uncharacterized protein	-1.19696
Cc09_g02540	GSCOC_T00017664001	Sporulation RMD1	-1.19612
Cc02_g09740	GSCOC_T00029616001	Uncharacterized protein	-1.19611
Cc07_g18240	GSCOC_T00018778001	ATP-dependent zinc metalloprotease	-1.1953
Cc01_g14390	GSCOC_T00028437001	Chromodomain-helicase-DNA-binding 4	-1.19474
Cc10_g04670	GSCOC_T00034908001	50S ribosomal L4	-1.19471
Cc09_g01640	GSCOC_T00017783001	Soluble starch synthase chloroplastic amyloplastic	-1.19419
Cc05_g06510	GSCOC_T00042141001	Pentatricopeptide repeat-containing At1g03540	-1.19391
Cc01_g17220	GSCOC_T00016351001	Pantoate--beta-alanine ligase	-1.1935
Cc05_g02350	GSCOC_T00001634001	UDP-glucose flavonoid 3-O-glucosyltransferase 6	-1.19282
Cc08_g12840	GSCOC_T00030423001	Adenine phosphoribosyltransferase chloroplastic	-1.19225
Cc05_g12370	GSCOC_T00021199001	Protochlorophyllide chloroplastic	-1.19118
Cc00_g10920	GSCOC_T00001640001	Pentatricopeptide repeat-containing chloroplastic	-1.1909
Cc00_g17560	GSCOC_T00008472001	Uncharacterized protein	-1.19031
Cc11_g03870	GSCOC_T00033996001	Glycerophosphodiester periplasmic	-1.18942
Cc02_g06970	GSCOC_T00039253001	Uncharacterized protein At2g39920	-1.18884
Cc05_g16130	GSCOC_T00038602001	Uncharacterized protein	-1.18837
Cc02_g01440	GSCOC_T00019967001	Uncharacterized protein	-1.1883
Cc01_g19020	GSCOC_T00016112001	Heat stress transcription factor A-6b	-1.18794
Cc02_g11240	GSCOC_T00029437001	Extended synaptotagmin-2	-1.18736
Cc08_g09070	GSCOC_T00017247001	Alcohol dehydrogenase class-3	-1.18734
Cc04_g05320	GSCOC_T00022281001	ASPARTIC PROTEASE IN GUARD CELL 2	-1.18629
Cc01_g20070	GSCOC_T00015977001	SOSS complex subunit B homolog	-1.18617
Cc05_g09920	GSCOC_T00021523001	Elongation factor mitochondrial	-1.18567
Cc11_g14300	GSCOC_T00032075001	Uncharacterized protein	-1.18376
Cc06_g08590	GSCOC_T00031110001	Pentatricopeptide repeat-containing mitochondrial	-1.18333
Cc08_g03480	GSCOC_T00034128001	Uncharacterized protein	-1.18319
Cc05_g00360	GSCOC_T00017067001	Pentatricopeptide repeat-containing At3g59040	-1.18265
Cc08_g07240	GSCOC_T00025338001	Pentatricopeptide repeat-containing At5g06540	-1.18155
Cc02_g08130	GSCOC_T00029842001	Pentatricopeptide repeat-containing At4g33990	-1.18071
Cc01_g17990	GSCOC_T00016257001	DAG chloroplastic	-1.18029
Cc11_g06690	GSCOC_T00020694001	Alph	-1.18021
Cc01_g12270	GSCOC_T00028157001	Very-long-chain (3R)-3-hydroxyacyl- dehydratase 2	-1.17955
Cc01_g10320	GSCOC_T00024120001	RING finger and CHY zinc finger domain-containing 1	-1.17826
Cc06_g16630	GSCOC_T00030657001	Probable glucuronoxylan glucuronosyltransferase F8H	-1.1778
Cc05_g09840	GSCOC_T00021532001	Uncharacterized protein	-1.17773
Cc08_g11040	GSCOC_T00027095001	(S)-coclaurine N-methyltransferase	-1.17652
Cc02_g13670	GSCOC_T00029117001	Receptor kinase At5g59670	-1.17635
Cc06_g04160	GSCOC_T00023725001	Uncharacterized protein	-1.17634
Cc08_g00950	GSCOC_T00038447001	Uncharacterized protein	-1.17566
Cc06_g05130	GSCOC_T00043046001	Pentatricopeptide repeat-containing mitochondrial	-1.17558
Cc06_g11150	GSCOC_T00041692001	Pentatricopeptide repeat-containing mitochondrial	-1.17537
Cc01_g08770	GSCOC_T00023912001	Uncharacterized protein At5g41620	-1.17504
Cc09_g09520	GSCOC_T00000754001	LRR receptor-like serine threonine- kinase FLS2	-1.17469
Cc06_g06540	GSCOC_T00031370001	Testis-expressed protein 10	-1.17458
Cc06_g00550	GSCOC_T00023236001	WEB family At2g38370	-1.17401
Cc03_g04840	GSCOC_T00026214001	Histone H1	-1.17305
Cc10_g05550	GSCOC_T00034793001	arginine N-methyltransferase 2	-1.17117
Cc04_g05970	GSCOC_T00022372001	Probable zinc protease	-1.17115
Cc02_g30330	GSCOC_T00018330001	Probable plastid-lipid-associated chloroplastic	-1.1711
Cc10_g14300	GSCOC_T00012021001	Uncharacterized protein	-1.17094
Cc06_g10310	GSCOC_T00041800001	Pentatricopeptide repeat-containing mitochondrial	-1.16935
Cc07_g13470	GSCOC_T00036733001	NADH dehydrogenas	-1.16864
Cc02_g12710	GSCOC_T00029247001	Pentatricopeptide repeat-containing At4g02750	-1.16852
Cc08_g14290	GSCOC_T00030242001	Uncharacterized protein	-1.16801
Cc02_g33300	GSCOC_T00015357001	Zinc finger chloroplastic	-1.16798
Cc06_g11940	GSCOC_T00041597001	Mechanosensitive ion channel 10	-1.16761
Cc10_g05640	GSCOC_T00034784001	LOB domain-containing 37	-1.16686
Cc02_g38850	GSCOC_T00027801001	Uncharacterized protein	-1.16619
Cc00_g10630	GSCOC_T00003947001	Pentatricopeptide repeat-containing At4g16470	-1.16579
Cc11_g14990	GSCOC_T00001032001	Glycine--tRNA mitochondrial 1	-1.16517
Cc04_g08600	GSCOC_T00022725001	Disease resistance RPP13	-1.1649
Cc05_g09390	GSCOC_T00021591001	Ribosomal L1 domain-containing 1	-1.16482
Cc00_g22790	GSCOC_T00009269001	Ferrochelatase- chloroplastic	-1.16482
Cc05_g12580	GSCOC_T00021171001	Uncharacterized protein YnbB	-1.16472
Cc11_g07090	GSCOC_T00018109001	Pentatricopeptide repeat-containing At4g14850	-1.16409
Cc02_g28640	GSCOC_T00009452001	Probable receptor kinase At5g39030	-1.16375
Cc02_g37260	GSCOC_T00028017001	Serine arginine-rich splicing factor RS41	-1.16287
Cc01_g01420	GSCOC_T00037910001	F-box FBD LRR-repeat At1g16930	-1.1628
Cc09_g06780	GSCOC_T00005136001	argonaute 3	-1.16182
Cc07_g18480	GSCOC_T00018747001	Uncharacterized protein	-1.16123
Cc01_g05590	GSCOC_T00027367001	Uncharacterized protein	-1.16121
Cc11_g11070	GSCOC_T00032488001	Uncharacterized protein	-1.16017
Cc02_g23950	GSCOC_T00015100001	Pentatricopeptide repeat-containing chloroplastic	-1.15994
Cc08_g05330	GSCOC_T00024288001	Ubiquinol oxidase mitochondrial	-1.15936
Cc02_g12100	GSCOC_T00029332001	G-type lectin S-receptor-like serine threonine- kinase SD1-29	-1.15909
Cc00_g31390	GSCOC_T00012572001	Uncharacterized protein	-1.15886
Cc00_g04100	GSCOC_T00013737001	NADH dehydrogenas	-1.15847
Cc03_g10530	GSCOC_T00031072001	UDP-glycosyltransferase 92A1	-1.15813
Cc06_g10830	GSCOC_T00041729001	Uncharacterized protein	-1.15788
Cc10_g04190	GSCOC_T00034966001	Chlorophyll a-b binding chloroplastic	-1.15761
Cc07_g07860	GSCOC_T00040148001	Heat shock 70 kDa mitochondrial	-1.15714
Cc04_g06350	GSCOC_T00022421001	Pentatricopeptide repeat-containing At3g18020	-1.15509
Cc08_g15650	GSCOC_T00035504001	Pentatricopeptide repeat-containing At5g66520	-1.15416
Cc02_g00500	GSCOC_T00019833001	5 -3 exoribonuclease 4	-1.15407
Cc07_g12750	GSCOC_T00036836001	Uncharacterized protein	-1.15363
Cc02_g08640	GSCOC_T00029767001	Early light-induced chloroplastic	-1.15213
Cc06_g11570	GSCOC_T00041642001	Heat stress transcription factor A-2	-1.15089
Cc00_g00150	GSCOC_T00036091001	Pentatricopeptide repeat-containing At3g42630	-1.15086
Cc06_g23670	GSCOC_T00040539001	Chloroplast envelope membrane	-1.14906
Cc05_g05130	GSCOC_T00035067001	Pentatricopeptide repeat-containing chloroplastic	-1.14903
Cc01_g21110	GSCOC_T00005021001	Ethylene receptor 1	-1.14879
Cc05_g00630	GSCOC_T00017104001	Uncharacterized protein	-1.14832
Cc10_g04950	GSCOC_T00034871001	Uncharacterized protein	-1.14778
Cc03_g11520	GSCOC_T00019359001	Nucleolar 6	-1.14773
Cc03_g13070	GSCOC_T00030608001	Uncharacterized protein	-1.14756
Cc02_g13350	GSCOC_T00029169001	Pentatricopeptide repeat-containing At2g33760	-1.14683
Cc02_g21870	GSCOC_T00014837001	Uncharacterized protein	-1.14654
Cc04_g16650	GSCOC_T00035772001	Pentatricopeptide repeat-containing At1g74630	-1.14634
Cc01_g00140	GSCOC_T00012421001	Lysine--tRNA ligase	-1.1462
Cc03_g11620	GSCOC_T00019377001	Pentatricopeptide repeat-containing At2g17140	-1.14592
Cc04_g17230	GSCOC_T00035861001	ABC transporter A family member 5	-1.14539
Cc10_g09680	GSCOC_T00031513001	Uncharacterized protein	-1.14495
Cc07_g07770	GSCOC_T00040137001	Inter-alpha-trypsin inhibitor heavy chain H3	-1.14426
Cc08_g02910	GSCOC_T00037792001	33 kDa chloroplastic	-1.1439
Cc09_g03490	GSCOC_T00017542001	Uncharacterized protein	-1.14321
Cc00_g16010	GSCOC_T00009613001	disease resistance RPP13 1	-1.13986
Cc02_g34840	GSCOC_T00011791001	Pentatricopeptide repeat-containing At1g09190	-1.13936
Cc07_g12420	GSCOC_T00036876001	Pentatricopeptide repeat-containing At5g66520	-1.13865
Cc04_g11230	GSCOC_T00037289001	Violaxanthin de- chloroplastic	-1.13795
Cc02_g13420	GSCOC_T00029160001	Probable L-type lectin-domain containing receptor kinase	-1.1376
Cc02_g35100	GSCOC_T00011830001	Pentatricopeptide repeat-containing At1g60770	-1.13716
Cc11_g09930	GSCOC_T00032649001	Transcription factor MYB21	-1.13684
Cc09_g02920	GSCOC_T00017612001	Peroxisome biogenesis 16	-1.1368
Cc10_g12810	GSCOC_T00032010001	Pentatricopeptide repeat-containing mitochondrial	-1.13653
Cc07_g02150	GSCOC_T00039397001	Phosphoglucan phosphatase chloroplastic	-1.13601
Cc02_g05730	GSCOC_T00039089001	Sister chromatid cohesion 1 1	-1.13427
Cc10_g13250	GSCOC_T00035321001	Bifunctional uridylyltransferase uridylyl-removing enzyme	-1.13301
Cc10_g09570	GSCOC_T00031526001	Uncharacterized protein	-1.13285
Cc05_g01920	GSCOC_T00015782001	UDP-glucose flavonoid 3-O-glucosyltransferase 6	-1.13271
Cc10_g08020	GSCOC_T00034451001	Tubulin alpha chain	-1.13206
Cc03_g08320	GSCOC_T00033236001	Beta-hexosaminidase subunit B2	-1.13143
Cc05_g04800	GSCOC_T00035016001	DETOXIFICATION 41	-1.13121
Cc07_g09360	GSCOC_T00037254001	Uncharacterized protein	-1.13114
Cc04_g02800	GSCOC_T00021961001	Zinc phosphodiesterase ELAC 2	-1.13096
Cc02_g37530	GSCOC_T00027977001	(+)-neomenthol dehydrogenase	-1.13029
Cc01_g09740	GSCOC_T00024038001	Uncharacterized protein	-1.13009
Cc07_g01720	GSCOC_T00039348001	Uncharacterized protein	-1.12973
Cc07_g00280	GSCOC_T00019094001	Zinc finger CCCH domain-containing 67	-1.12965
Cc00_g33530	GSCOC_T00001372001	(S)-coclaurine N-methyltransferase	-1.12929
Cc09_g06460	GSCOC_T00005094001	MADS-box SOC1	-1.12925
Cc02_g37510	GSCOC_T00027980001	(+)-neomenthol dehydrogenase	-1.12924
Cc06_g09230	GSCOC_T00041941001	Transmembrane 19	-1.12828
Cc04_g09410	GSCOC_T00022828001	Poly(A) polymerase I	-1.12825
Cc02_g36890	GSCOC_T00003863001	DEAD-box ATP-dependent RNA helicase chloroplastic	-1.12796
Cc10_g02150	GSCOC_T00024713001	Microspherule 1	-1.1273
Cc05_g03220	GSCOC_T00033518001	Uncharacterized protein	-1.12716
Cc04_g04990	GSCOC_T00022239001	Probable aquaporin NIP5-1	-1.12713
Cc00_g35970	GSCOC_T00007523001	Probable LRR receptor-like serine threonine- kinase At2g16250	-1.12619
Cc00_g26280	GSCOC_T00007717001	Disease resistance RGA2	-1.12491
Cc10_g00680	GSCOC_T00024525001	Pentatricopeptide repeat-containing chloroplastic	-1.12421
Cc08_g05410	GSCOC_T00024305001	Uncharacterized protein	-1.12421
Cc02_g09270	GSCOC_T00029679001	Uncharacterized protein At2g3979	-1.12414
Cc03_g01630	GSCOC_T00025782001	Uncharacterized protein	-1.12387
Cc02_g09190	GSCOC_T00029690001	Pentatricopeptide repeat-containing At3g14330	-1.12307
Cc02_g27390	GSCOC_T00025069001	30S ribosomal chloroplastic	-1.12254
Cc11_g05950	GSCOC_T00020572001	Ankyrin repeat-containing ITN1	-1.12186
Cc00_g32550	GSCOC_T00004755001	Serine carboxypeptidase-like 19	-1.12178
Cc00_g04190	GSCOC_T00006614001	60S ribosomal L10-2	-1.12106
Cc06_g22390	GSCOC_T00017202001	Uncharacterized protein	-1.12082
Cc11_g10280	GSCOC_T00032598001	DNA (cytosine-5)-methyltransferase CMT2	-1.12039
Cc07_g01880	GSCOC_T00039365001	Chaperone	-1.11772
Cc11_g15440	GSCOC_T00038055001	2-phytyl-	-1.11763
Cc06_g03290	GSCOC_T00023609001	Pentatricopeptide repeat-containing At2g37320	-1.11572
Cc10_g15700	GSCOC_T00033762001	Pentatricopeptide repeat-containing At3g14730	-1.11511
Cc08_g07200	GSCOC_T00025333001	Uncharacterized protein	-1.11501
Cc00_g24210	GSCOC_T00008185001	Small subunit processome component 20 homolog	-1.11456
Cc04_g13320	GSCOC_T00018306001	Uncharacterized protein	-1.11245
Cc09_g06020	GSCOC_T00033374001	Chaperonin 60 subunit alpha chloroplastic	-1.11208
Cc09_g02990	GSCOC_T00017602001	Uncharacterized protein	-1.11187
Cc00_g21810	GSCOC_T00009098001	Pentatricopeptide repeat-containing chloroplastic	-1.11172
Cc08_g01110	GSCOC_T00038429001	Uncharacterized protein	-1.11155
Cc06_g15720	GSCOC_T00030784001	Thioredoxin-like 3- chloroplastic	-1.10993
Cc06_g04310	GSCOC_T00023746001	Uncharacterized protein	-1.10949
Cc02_g00660	GSCOC_T00019856001	UNC93 2	-1.10922
Cc02_g39230	GSCOC_T00027746001	DEAD-box ATP-dependent RNA helicase 31	-1.10857
Cc05_g05060	GSCOC_T00035058001	Pentatricopeptide repeat-containing mitochondrial	-1.10817
Cc02_g25620	GSCOC_T00028725001	Uncharacterized protein	-1.10799
Cc06_g10430	GSCOC_T00041780001	ABC transporter B family member 8	-1.10768
Cc04_g13290	GSCOC_T00012381001	Uncharacterized protein	-1.10739
Cc10_g07260	GSCOC_T00034545001	Sugar transport 5	-1.10657
Cc06_g15830	GSCOC_T00030771001	Malate cytoplasmic	-1.1059
Cc10_g09600	GSCOC_T00031521001	Carboxymethylenebutenolidase homolog	-1.1057
Cc03_g15330	GSCOC_T00026812001	F-box SKIP24	-1.10309
Cc01_g00320	GSCOC_T00012401001	Uncharacterized protein	-1.10302
Cc03_g10040	GSCOC_T00031004001	MACPF domain-containing At1g14780	-1.10152
Cc05_g03650	GSCOC_T00017360001	Allene oxide chloroplastic	-1.10135
Cc00_g27820	GSCOC_T00006800001	Vinorine synthase	-1.0998
Cc02_g33430	GSCOC_T00015373001	Chaperone	-1.09977
Cc07_g07950	GSCOC_T00040157001	Serine mitochondrial	-1.09969
Cc08_g14530	GSCOC_T00030211001	Glutathione S-transferase T2	-1.09879
Cc04_g06830	GSCOC_T00022482001	Uncharacterized protein	-1.09878
Cc04_g15170	GSCOC_T00002602001	Pentatricopeptide repeat-containing At5g48910	-1.09851
Cc03_g13480	GSCOC_T00018977001	30S ribosomal chloroplastic	-1.09844
Cc03_g02080	GSCOC_T00025843001	Uncharacterized protein	-1.09834
Cc02_g10880	GSCOC_T00029480001	Uncharacterized protein	-1.09757
Cc05_g08430	GSCOC_T00016865001	2-aminoethanethiol dioxygenase	-1.09684
Cc11_g09620	GSCOC_T00032695001	Elongator complex 2	-1.09634
Cc01_g15350	GSCOC_T00016573001	Probable glutathione S-transferase parA	-1.09517
Cc06_g07060	GSCOC_T00031309001	Probable glutamate carboxypeptidase AMP1	-1.09427
Cc08_g02440	GSCOC_T00037718001	NAC domain-containing 78	-1.09397
Cc02_g18480	GSCOC_T00014392001	Peroxidase 10	-1.09245
Cc02_g17250	GSCOC_T00014234001	Bifunctional phosphatase chloroplastic	-1.09156
Cc03_g07770	GSCOC_T00026641001	Uncharacterized protein	-1.09119
Cc02_g08680	GSCOC_T00029763001	Ribulose-	-1.09051
Cc06_g08680	GSCOC_T00031099001	sel-1 homolog 1	-1.08958
Cc00_g16930	GSCOC_T00013750001	MDIS1-interacting receptor like kinase 2	-1.08906
Cc02_g12490	GSCOC_T00029275001	Anaphase-promoting complex subunit 4	-1.08882
Cc08_g13610	GSCOC_T00030322001	Uncharacterized protein	-1.08853
Cc03_g04850	GSCOC_T00026215001	Uncharacterized protein	-1.08847
Cc11_g15340	GSCOC_T00038044001	Uncharacterized protein	-1.08795
Cc06_g20300	GSCOC_T00022952001	Peptidyl-prolyl cis-trans isomerase FKBP65	-1.08792
Cc10_g00570	GSCOC_T00024513001	Catalase	-1.08768
Cc10_g10730	GSCOC_T00019399001	nuclease HARBI1	-1.0871
Cc04_g12810	GSCOC_T00003254001	Cyclic nucleotide-gated ion channel 18	-1.08642
Cc11_g08510	GSCOC_T00032863001	10 kDa mitochondrial	-1.08592
Cc02_g00880	GSCOC_T00019889001	Uncharacterized protein	-1.08586
Cc10_g09590	GSCOC_T00031523001	Uncharacterized protein	-1.0857
Cc08_g03180	GSCOC_T00037832001	mitochondrial	-1.08471
Cc11_g15000	GSCOC_T00001031001	Uncharacterized protein	-1.0847
Cc02_g24130	GSCOC_T00015127001	Ycf20	-1.08465
Cc09_g09590	GSCOC_T00004079001	Dehydrogenase reductase SDR family member on chromosome X	-1.08419
Cc10_g03120	GSCOC_T00024833001	Cytochrome P450 734A1	-1.08384
Cc02_g30820	GSCOC_T00023832001	ZINC INDUCED FACILITATOR-LIKE 1	-1.08366
Cc05_g12510	GSCOC_T00021183001	NAC domain-containing 18	-1.08322
Cc10_g07670	GSCOC_T00034493001	Uncharacterized protein	-1.08311
Cc10_g03110	GSCOC_T00024832001	Zinc finger NUTCRACKER	-1.08306
Cc02_g01570	GSCOC_T00019983001	Pentatricopeptide repeat-containing mitochondrial	-1.08298
Cc08_g05680	GSCOC_T00024355001	Adenylyltransferase and sulfurtransferase MOCS3-1	-1.08274
Cc10_g11920	GSCOC_T00031871001	NADPH-dependent alkenal one chloroplastic	-1.08258
Cc05_g12710	GSCOC_T00021156001	Myosin-2 heavy chain	-1.08255
Cc01_g15900	GSCOC_T00016505001	Haloalkane dehalogenase	-1.08211
Cc10_g14690	GSCOC_T00033614001	Pentatricopeptide repeat-containing At3g61360	-1.08195
Cc03_g00860	GSCOC_T00025683001	Uncharacterized protein	-1.0819
Cc01_g17150	GSCOC_T00016358001	Pentatricopeptide repeat-containing At3g22690	-1.08186
Cc02_g34610	GSCOC_T00000719001	misato homolog 1	-1.08038
Cc01_g13060	GSCOC_T00028266001	Scarecrow 14	-1.08017
Cc05_g11780	GSCOC_T00021271001	Ribosomal L11 methyltransferase	-1.07757
Cc02_g39880	GSCOC_T00027649001	CBL-interacting serine threonine- kinase 9	-1.07683
Cc05_g10370	GSCOC_T00021454001	Uncharacterized protein	-1.07614
Cc06_g03120	GSCOC_T00023584001	Uncharacterized protein	-1.07573
Cc04_g15460	GSCOC_T00042318001	Isochorismate chloroplastic	-1.07551
Cc06_g11650	GSCOC_T00041632001	Disease resistance RPS2	-1.07504
Cc05_g05830	GSCOC_T00035168001	UDP-glucose flavonoid 3-O-glucosyltransferase 3	-1.07484
Cc11_g01820	GSCOC_T00019508001	tRNA (cytosine(38)-C(5))-methyltransferase	-1.07437
Cc02_g21470	GSCOC_T00014789001	Outer envelope mitochondrial	-1.074
Cc07_g11500	GSCOC_T00036994001	Ribonuclease G	-1.07384
Cc00_g16750	GSCOC_T00004879001	Pentatricopeptide repeat-containing chloroplastic	-1.0737
Cc02_g34450	GSCOC_T00000690001	Pentatricopeptide repeat-containing mitochondrial	-1.07244
Cc04_g04800	GSCOC_T00022218001	F-box LRR-repeat 14	-1.07176
Cc07_g18510	GSCOC_T00018743001	ABC transporter I family member 10	-1.0714
Cc00_g19510	GSCOC_T00007978001	disease resistance RGA3	-1.07113
Cc11_g00490	GSCOC_T00007401001	Transcription factor MYB1R1	-1.07023
Cc03_g02780	GSCOC_T00025947001	Probable phosphatase 2C 35	-1.06988
Cc02_g01750	GSCOC_T00020005001	Pentatricopeptide repeat-containing chloroplastic	-1.06963
Cc05_g12680	GSCOC_T00021159001	B3 domain-containing Os07g0679700	-1.06861
Cc02_g04670	GSCOC_T00020386001	Uncharacterized protein	-1.06611
Cc11_g11460	GSCOC_T00032443001	pentatricopeptide repeat-containing At1g13630	-1.06593
Cc02_g36450	GSCOC_T00003923001	Cytochrome P450 704C1	-1.06582
Cc03_g06350	GSCOC_T00026426001	Pentatricopeptide repeat-containing At4g02750	-1.06574
Cc00_g18210	GSCOC_T00002580001	GPI mannosyltransferase 2	-1.06567
Cc02_g01760	GSCOC_T00020008001	Cyclic nucleotide-gated ion channel 1	-1.06535
Cc06_g05980	GSCOC_T00043168001	pentatricopeptide repeat-containing mitochondrial	-1.0652
Cc00_g17470	GSCOC_T00008148001	CTL DDB_G0274487	-1.06502
Cc02_g07710	GSCOC_T00029901001	Uncharacterized protein	-1.06472
Cc02_g37540	GSCOC_T00027976001	(+)-neomenthol dehydrogenase	-1.06433
Cc02_g22510	GSCOC_T00014923001	Uncharacterized protein At1g10890	-1.06384
Cc11_g03010	GSCOC_T00025488001	Uncharacterized protein	-1.06288
Cc11_g11410	GSCOC_T00032448001	DNA-directed RNA polymerase mitochondrial	-1.06287
Cc02_g09020	GSCOC_T00029712001	Uncharacterized protein	-1.06282
Cc01_g20040	GSCOC_T00015981001	tas	-1.06266
Cc08_g14820	GSCOC_T00035391001	UDP-N-acetylmuramoyl-L-alanyl-D-glutamate--	-1.06053
Cc08_g05380	GSCOC_T00024300001	Ubiquinol oxidase mitochondrial	-1.05955
Cc03_g13120	GSCOC_T00030599001	Histone-lysine N-methyltransferase ASHH1	-1.05839
Cc08_g00490	GSCOC_T00038509001	Adenine phosphoribosyltransferase 2	-1.05821
Cc08_g14320	GSCOC_T00030238001	Probable DEAD-box ATP-dependent RNA helicase 48	-1.05812
Cc02_g29340	GSCOC_T00018351001	amidase	-1.05758
Cc00_g30480	GSCOC_T00003185001	Disease resistance RGA2	-1.05664
Cc02_g10420	GSCOC_T00029531001	Exostosin-2	-1.05655
Cc02_g03970	GSCOC_T00020299001	STRUBBELIG-RECEPTOR FAMILY 8	-1.05651
Cc02_g37630	GSCOC_T00027963001	Bifunctional	-1.05609
Cc01_g03630	GSCOC_T00033075001	E3 ubiquitin- ligase LIN-1	-1.0558
Cc02_g30370	GSCOC_T00018338001	Calcium permeable stress-gated cation channel 1	-1.05522
Cc05_g12890	GSCOC_T00021130001	G-type lectin S-receptor-like serine threonine- kinase At4g27290	-1.05451
Cc05_g16080	GSCOC_T00038607001	chloroplastic	-1.05431
Cc02_g20060	GSCOC_T00014607001	Uncharacterized protein	-1.05421
Cc10_g16300	GSCOC_T00033849001	Uncharacterized protein	-1.05387
Cc11_g11700	GSCOC_T00032411001	E3 ubiquitin- ligase At3g02290	-1.05333
Cc03_g03390	GSCOC_T00026023001	methyltransferase C9orf114 homolog	-1.05285
Cc06_g04580	GSCOC_T00042970001	WD repeat-containing 3	-1.05004
Cc02_g32630	GSCOC_T00001214001	Sodium hydrogen exchanger 2	-1.04996
Cc09_g02670	GSCOC_T00017645001	G-type lectin S-receptor-like serine threonine- kinase At1g11303	-1.04915
Cc07_g10150	GSCOC_T00037154001	D-2-hydroxyglutarate mitochondrial	-1.0491
Cc07_g01110	GSCOC_T00019196001	Shikimate chloroplastic	-1.04881
Cc11_g15700	GSCOC_T00038088001	Uncharacterized protein	-1.04859
Cc00_g19100	GSCOC_T00000781001	Subtilisin-like protease	-1.04814
Cc07_g09170	GSCOC_T00040313001	G-box-binding factor 1	-1.04809
Cc11_g12570	GSCOC_T00032299001	Calcium permeable stress-gated cation channel 1	-1.04764
Cc05_g10410	GSCOC_T00021446001	Pentatricopeptide repeat-containing mitochondrial	-1.0468
Cc05_g04820	GSCOC_T00035018001	Glutamate receptor	-1.04647
Cc02_g15740	GSCOC_T00014033001	Pentatricopeptide repeat-containing At4g18840	-1.04615
Cc02_g17560	GSCOC_T00014275001	Transcription termination factor mitochondrial	-1.04556
Cc00_g08180	GSCOC_T00000292001	Endoplasmin homolog	-1.04484
Cc02_g07180	GSCOC_T00009485001	UDP-glycosyltransferase 85A2	-1.04438
Cc10_g10060	GSCOC_T00031461001	Exostosin-2	-1.04421
Cc00_g18840	GSCOC_T00002533001	Hippocampus abundant transcript 1	-1.04355
Cc01_g01000	GSCOC_T00038000001	Pentatricopeptide repeat-containing At4g37170	-1.04319
Cc04_g13140	GSCOC_T00018883001	UDP-glycosyltransferase 83A1	-1.04307
Cc06_g08160	GSCOC_T00031165001	Beta-	-1.04261
Cc03_g00600	GSCOC_T00025645001	Cell wall vacuolar inhibitor of fructosidase 1	-1.04248
Cc07_g10450	GSCOC_T00037115001	Fructose-bisphosphate aldolase chloroplastic	-1.04245
Cc11_g13990	GSCOC_T00032117001	D -box ATP-dependent RNA helicase D 15 chloroplastic	-1.04209
Cc04_g06110	GSCOC_T00022392001	Uncharacterized protein	-1.04185
Cc06_g06330	GSCOC_T00031396001	Uncharacterized protein	-1.04109
Cc08_g09260	GSCOC_T00017272001	NRT1 PTR FAMILY	-1.04094
Cc07_g08570	GSCOC_T00040236001	Non-specific lipid-transfer 2	-1.04069
Cc06_g02930	GSCOC_T00023562001	Uncharacterized protein	-1.04061
Cc10_g08010	GSCOC_T00034452001	Xylulose kinase	-1.04048
Cc05_g08520	GSCOC_T00016876001	pentatricopeptide repeat-containing At4g17915	-1.04039
Cc11_g06260	GSCOC_T00020632001	Histidine kinase 4	-1.04008
Cc09_g08850	GSCOC_T00023158001	Uncharacterized protein ycf23	-1.03968
Cc11_g11060	GSCOC_T00032489001	Uncharacterized protein	-1.03963
Cc00_g24390	GSCOC_T00002089001	Phospholipase A1- chloroplastic	-1.03905
Cc08_g10570	GSCOC_T00027028001	Uncharacterized protein ycf36	-1.03902
Cc01_g14910	GSCOC_T00028512001	Cation H(+) antiporter 15	-1.03886
Cc01_g05040	GSCOC_T00028590001	Pentatricopeptide repeat-containing At3g48810	-1.03851
Cc05_g15960	GSCOC_T00038621001	NAC domain-containing 21 22	-1.03844
Cc05_g14790	GSCOC_T00038777001	30S ribosomal chloroplastic	-1.0384
Cc04_g11470	GSCOC_T00037335001	Pentatricopeptide repeat-containing mitochondrial	-1.03796
Cc01_g16040	GSCOC_T00016489001	Glycine oxidase	-1.03731
Cc09_g05780	GSCOC_T00033416001	Pentatricopeptide repeat-containing mitochondrial	-1.03666
Cc05_g16140	GSCOC_T00038601001	Mitotic spindle assembly checkpoint MAD2B	-1.03583
Cc10_g03430	GSCOC_T00024868001	pentatricopeptide repeat-containing At1g19290	-1.03582
Cc11_g09540	GSCOC_T00032705001	zinc finger At1g68190	-1.03562
Cc03_g14430	GSCOC_T00026660001	Cysteine chloroplastic chromoplastic	-1.03484
Cc01_g13300	GSCOC_T00028295001	Pentatricopeptide repeat-containing chloroplastic	-1.03463
Cc01_g15590	GSCOC_T00016544001	50S ribosomal chloroplastic	-1.03381
Cc10_g12890	GSCOC_T00035370001	Pentatricopeptide repeat-containing mitochondrial	-1.03349
Cc02_g22110	GSCOC_T00014872001	Probable helicase MAGATAMA 3	-1.03191
Cc06_g16170	GSCOC_T00030727001	Probable disease resistance RPP8 2	-1.03186
Cc05_g07570	GSCOC_T00042289001	Pentatricopeptide repeat-containing At5g16860	-1.03147
Cc03_g03980	GSCOC_T00026099001	Uncharacterized N-acetyltransferase p20	-1.03132
Cc10_g14610	GSCOC_T00033602001	Uncharacterized protein	-1.03119
Cc07_g11190	GSCOC_T00037029001	Uncharacterized protein	-1.0308
Cc02_g05020	GSCOC_T00039000001	Uncharacterized N-acetyltransferase ycf52	-1.03009
Cc11_g15220	GSCOC_T00038029001	AMSH-like ubiquitin thioesterase 2	-1.02991
Cc02_g30910	GSCOC_T00023847001	Protoporphyrinogen oxidase 2	-1.02855
Cc09_g05080	GSCOC_T00007081001	Phosphoribosylglycinamide chloroplastic	-1.02773
Cc02_g08200	GSCOC_T00029832001	Pentatricopeptide repeat-containing At2g39620	-1.02761
Cc05_g05050	GSCOC_T00035057001	Histone-lysine N-methyltransferase ATXR2	-1.02715
Cc02_g25250	GSCOC_T00028774001	Pentatricopeptide repeat-containing At1g02150	-1.02705
Cc06_g10780	GSCOC_T00041734001	Glutathione hydrolase 1 proenzyme	-1.02679
Cc02_g02470	GSCOC_T00020102001	Uncharacterized membrane	-1.026
Cc00_g01620	GSCOC_T00002732001	Uncharacterized protein	-1.02532
Cc02_g09320	GSCOC_T00029669001	Pentatricopeptide repeat-containing mitochondrial	-1.02506
Cc04_g05690	GSCOC_T00022334001	Sucrose nonfermenting 4	-1.0243
Cc11_g03150	GSCOC_T00025459001	DNA-directed RNA polymerase I subunit RPA2	-1.02351
Cc06_g20190	GSCOC_T00022930001	domain-containing chloroplastic	-1.02344
Cc01_g13810	GSCOC_T00028361001	AT-rich interactive domain-containing 2	-1.02321
Cc10_g07940	GSCOC_T00034459001	Inositol-tetrakisphosphate 1-kinase 2	-1.02305
Cc00_g11130	GSCOC_T00009397001	disease resistance RGA3	-1.02287
Cc04_g10510	GSCOC_T00042603001	Nuclear pore complex Nup155	-1.02164
Cc03_g03760	GSCOC_T00026076001	Photosystem II repair PSB27- chloroplastic	-1.02119
Cc11_g08760	GSCOC_T00032829001	late blight resistance homolog R1B-12	-1.02093
Cc01_g06320	GSCOC_T00029997001	Methyltransferase 22	-1.02091
Cc03_g08330	GSCOC_T00033237001	Uncharacterized protein	-1.02074
Cc02_g31850	GSCOC_T00027482001	Trihelix transcription factor GTL2	-1.02024
Cc11_g08820	GSCOC_T00032822001	Transcription repressor MYB6	-1.0202
Cc11_g11860	GSCOC_T00032389001	Uncharacterized protein	-1.01961
Cc01_g16100	GSCOC_T00016481001	Uncharacterized sodium-dependent transporter	-1.01849
Cc06_g20910	GSCOC_T00015850001	Uncharacterized protein	-1.01636
Cc01_g05670	GSCOC_T00027379001	Cytochrome P450 94A1	-1.01602
Cc00_g27250	GSCOC_T00000481001	Thioredoxin chloroplastic	-1.01573
Cc08_g09890	GSCOC_T00026943001	Histidine-containing phosphotransfer 4	-1.01558
Cc00_g10990	GSCOC_T00000137001	Secologanin synthase	-1.01552
Cc07_g19510	GSCOC_T00018565001	Pentatricopeptide repeat-containing mitochondrial	-1.01538
Cc07_g08960	GSCOC_T00040288001	Uncharacterized protein	-1.01476
Cc09_g06110	GSCOC_T00033361001	Pentatricopeptide repeat-containing At1g62350	-1.01431
Cc02_g29720	GSCOC_T00010177001	p21-activated kinase-interacting 1-like	-1.01364
Cc00_g15060	GSCOC_T00008516001	Sec14 cytosolic factor	-1.01292
Cc05_g09830	GSCOC_T00021533001	Telomere repeat-binding factor 3	-1.01255
Cc04_g10930	GSCOC_T00042671001	28 kDa chloroplastic	-1.01254
Cc03_g04810	GSCOC_T00026211001	Chloroplastic group IIA intron splicing facilitator chloroplastic	-1.01234
Cc11_g02390	GSCOC_T00032974001	Probable inactive purple acid phosphatase 29	-1.01229
Cc02_g09420	GSCOC_T00029657001	Uncharacterized protein	-1.01179
Cc02_g35190	GSCOC_T00042888001	Pentatricopeptide repeat-containing At5g66520	-1.0112
Cc03_g10910	GSCOC_T00042031001	Cytochrome P450 71A2	-1.01041
Cc11_g12790	GSCOC_T00032269001	KH domain-containing At4g18375	-1.01035
Cc09_g05510	GSCOC_T00013393001	Uncharacterized protein	-1.00987
Cc01_g11800	GSCOC_T00028091001	L-ascorbate peroxidase cytosolic	-1.00965
Cc06_g22890	GSCOC_T00040654001	glucose-6-phosphate 1-epimerase	-1.00924
Cc09_g07140	GSCOC_T00036309001	Ribose-5-phosphate isomerase A	-1.00694
Cc02_g24840	GSCOC_T00028834001	Transcription factor GAMYB	-1.00645
Cc11_g15410	GSCOC_T00038051001	Uncharacterized protein	-1.00586
Cc06_g07590	GSCOC_T00031243001	Uncharacterized protein	-1.00566
Cc07_g04150	GSCOC_T00039667001	Uncharacterized protein	-1.00542
Cc06_g12200	GSCOC_T00041566001	Cysteine ase 3	-1.00531
Cc11_g03880	GSCOC_T00033997001	Pentatricopeptide repeat-containing chloroplastic	-1.00495
Cc02_g18390	GSCOC_T00014380001	Uncharacterized protein	-1.00478
Cc11_g02280	GSCOC_T00032997001	Photosystem II stability assembly factor chloroplastic	-1.00445
Cc00_g06810	GSCOC_T00007411001	Uncharacterized protein	-1.00425
Cc04_g11910	GSCOC_T00037403001	F-box kelch-repeat At3g06240	-1.00356
Cc02_g12240	GSCOC_T00029309001	Equilibrative nucleoside transporter 4	-1.00329
Cc06_g09770	GSCOC_T00041871001	tRNA(Ile)-lysidine synthase	-1.00238
Cc11_g12630	GSCOC_T00032291001	Uncharacterized protein	-1.0023
Cc06_g05140	GSCOC_T00043047001	Peroxiredoxin- chloroplastic	-1.00184
Cc11_g04820	GSCOC_T00042918001	Uncharacterized protein	-1.00162
Cc11_g16740	GSCOC_T00038220001	Probable mitochondrial chaperone bcs1	-1.00162
Cc01_g13940	GSCOC_T00028378001	ATP-dependent zinc metalloprotease FTSH chloroplastic	-1.00034
Cc07_g18640	GSCOC_T00018723001	2-oxoisovalerate dehydrogenase subunit mitochondrial	-1.00021
Cc02_g21930	GSCOC_T00014843001	Phosphatidylserine decarboxylase proenzyme 3	-0.998977
Cc02_g00840	GSCOC_T00019884001	Uncharacterized protein	-0.998939
Cc02_g11890	GSCOC_T00029359001	Pentatricopeptide repeat-containing mitochondrial	-0.998897
Cc01_g05820	GSCOC_T00027404001		-0.998298
Cc03_g16010	GSCOC_T00001665001	Pentatricopeptide repeat-containing At5g08305	-0.998012
Cc00_g04360	GSCOC_T00005968001	Probable mitochondrial chaperone bcs1	-0.997977
Cc01_g15580	GSCOC_T00016545001	Uncharacterized protein	-0.997682
Cc04_g15370	GSCOC_T00042306001	Uncharacterized protein	-0.997586
Cc00_g01400	GSCOC_T00010641001	L-type lectin-domain containing receptor kinase	-0.996342
Cc09_g02380	GSCOC_T00017685001	50S ribosomal chloroplastic	-0.996247
Cc07_g13060	GSCOC_T00036798001	Cysteine-rich receptor kinase 3	-0.99599
Cc07_g19990	GSCOC_T00033911001	Auxin-induced 5NG4	-0.995964
Cc07_g14460	GSCOC_T00036612001	Proline--tRNA ligase	-0.995331
Cc06_g03960	GSCOC_T00023697001	Cytokinin riboside 5 -monophosphate phosphoribohydrolase LOG1	-0.994859
Cc04_g03450	GSCOC_T00022040001	Pentatricopeptide repeat-containing At3g16010	-0.992896
Cc02_g09030	GSCOC_T00029711001	Peptidyl-prolyl cis-trans isomerase	-0.991797
Cc02_g00900	GSCOC_T00019891001	Uncharacterized protein	-0.991293
Cc02_g23470	GSCOC_T00015043001	Pentatricopeptide repeat-containing At1g10270	-0.990747
Cc08_g09460	GSCOC_T00026886001	Exosome complex exonuclease RRP46 homolog	-0.989867
Cc02_g18870	GSCOC_T00014444001	nucleic acid deglycase DJ-1	-0.989659
Cc01_g20090	GSCOC_T00015975001	U3 small nucleolar RNA-associated 15 homolog	-0.989366
Cc07_g20660	GSCOC_T00027317001	Tuftelin-interacting 11	-0.989151
Cc09_g05190	GSCOC_T00007093001	GTP-binding ERG	-0.98886
Cc02_g32810	GSCOC_T00016700001	Probable S-acyltransferase 17	-0.988844
Cc04_g12330	GSCOC_T00005286001	Uncharacterized protein	-0.988837
Cc00_g00420	GSCOC_T00036127001	Arginine decarboxylase	-0.988711
Cc06_g19490	GSCOC_T00029014001	Pentatricopeptide repeat-containing mitochondrial	-0.988438
Cc09_g04440	GSCOC_T00017425001	Pentatricopeptide repeat-containing At1g06143	-0.987984
Cc02_g23260	GSCOC_T00015013001	Stromal 70 kDa heat shock-related chloroplastic	-0.987786
Cc07_g17780	GSCOC_T00018849001	TONSOKU	-0.98773
Cc03_g05510	GSCOC_T00026308001	Chromatin modification-related MEAF6	-0.986948
Cc08_g00700	GSCOC_T00038480001	Glycerol-3-phosphate acyltransferase 3	-0.986225
Cc08_g01720	GSCOC_T00038342001	Transducin beta 3	-0.986173
Cc11_g12840	GSCOC_T00032259001	Transcription termination factor mitochondrial	-0.98573
Cc07_g05430	GSCOC_T00039815001	vacuolar sorting-associated 13C	-0.985622
Cc00_g07630	GSCOC_T00006753001	Histone	-0.985413
Cc00_g21100	GSCOC_T00012627001	Probable LRR receptor-like serine threonine- kinase At1g56130	-0.985103
Cc11_g08260	GSCOC_T00032901001	ARABIDILLO 1	-0.985022
Cc03_g13960	GSCOC_T00031767001	Mediator of RNA polymerase II transcription subunit 21	-0.984999
Cc10_g09580	GSCOC_T00031525001	Cysteine ase inhibitor 5	-0.984922
Cc02_g24720	GSCOC_T00028850001	Uncharacterized protein	-0.983717
Cc11_g04660	GSCOC_T00004830001	Pentatricopeptide repeat-containing chloroplastic	-0.983394
Cc06_g14630	GSCOC_T00041231001	Uncharacterized protein Cbei_0202	-0.983339
Cc06_g11560	GSCOC_T00041644001	Zinc finger CCCH domain-containing 65	-0.982441
Cc07_g12370	GSCOC_T00036882001	UPF0548 At2g17695	-0.982427
Cc00_g23980	GSCOC_T00010601001	Pentatricopeptide repeat-containing mitochondrial	-0.982256
Cc08_g05080	GSCOC_T00042451001	Uncharacterized protein	-0.981846
Cc05_g00890	GSCOC_T00013184001	Pentatricopeptide repeat-containing At4g16470	-0.980234
Cc06_g16950	GSCOC_T00004152001	G-type lectin S-receptor-like serine threonine- kinase SD3-1	-0.980184
Cc09_g03970	GSCOC_T00017481001	TATA box-binding -associated factor RNA polymerase I subunit B	-0.980067
Cc04_g00190	GSCOC_T00021618001	Uncharacterized protein	-0.980025
Cc11_g10360	GSCOC_T00032588001	30S ribosomal 3- chloroplastic	-0.979838
Cc01_g07590	GSCOC_T00009377001	(+)-neomenthol dehydrogenase	-0.979575
Cc02_g02000	GSCOC_T00020042001	Uncharacterized protein	-0.979563
Cc09_g09200	GSCOC_T00023084001	DNA-directed RNA polymerase III subunit rpc1	-0.979523
Cc09_g03050	GSCOC_T00017596001	Exosome complex component CSL4	-0.979281
Cc02_g22590	GSCOC_T00014934001	pentatricopeptide repeat-containing At3g49142	-0.979179
Cc03_g10820	GSCOC_T00042011001	15-cis-zeta-carotene chloroplastic	-0.978835
Cc04_g12880	GSCOC_T00003262001	Gibberellin 3-beta-dioxygenase 1	-0.978666
Cc09_g05400	GSCOC_T00007122001	Multiple RNA-binding domain-containing 1	-0.978588
Cc00_g21120	GSCOC_T00008500001	H ACA ribonucleo complex non-core subunit NAF1	-0.97782
Cc03_g09300	GSCOC_T00042688001	UDP-glycosyltransferase 75D1	-0.977675
Cc06_g15250	GSCOC_T00030858001	ABC transporter I family member 1	-0.977638
Cc06_g17120	GSCOC_T00012656001	Exosome complex component RRP43	-0.976646
Cc07_g16230	GSCOC_T00037591001	Uncharacterized protein	-0.976598
Cc11_g14350	GSCOC_T00032069001	Uncharacterized protein	-0.975267
Cc02_g26530	GSCOC_T00024950001	50S ribosomal chloroplastic (Fragment)	-0.974725
Cc05_g09290	GSCOC_T00002649001	Transcription termination factor mitochondrial	-0.974149
Cc06_g18590	GSCOC_T00040482001	L-galactono-	-0.973956
Cc10_g04440	GSCOC_T00034934001	Patatin group A-3	-0.973817
Cc02_g18640	GSCOC_T00014414001	Presequence protease chloroplastic mitochondrial	-0.973654
Cc04_g04930	GSCOC_T00022232001	Uncharacterized protein	-0.973562
Cc02_g07540	GSCOC_T00029923001	Pumilio homolog 1	-0.973302
Cc01_g19380	GSCOC_T00016065001	Uncharacterized protein	-0.972939
Cc09_g08740	GSCOC_T00020853001	Auxin response factor 6	-0.972177
Cc11_g00310	GSCOC_T00019460001	vacuolar sorting-associated 13F	-0.972014
Cc02_g19190	GSCOC_T00014483001	Uncharacterized transporter Mb2703	-0.971883
Cc01_g02450	GSCOC_T00009705001	Uncharacterized protein At5g01610	-0.971625
Cc04_g11940	GSCOC_T00037408001	Uncharacterized protein	-0.971444
Cc07_g01660	GSCOC_T00039341001	ABC transporter B family member chloroplastic	-0.970576
Cc00_g12470	GSCOC_T00005354001	Probable flavonol synthase 5	-0.970287
Cc05_g11290	GSCOC_T00021335001	Probable leucine-rich repeat receptor-like serine threonine- kinase At3g14840	-0.969914
Cc05_g13530	GSCOC_T00021051001	DNA polymerase I	-0.969009
Cc06_g12530	GSCOC_T00041526001	20 kDa chloroplastic	-0.968982
Cc11_g01050	GSCOC_T00019651001	Probable RNA helicase SDE3	-0.968711
Cc04_g02150	GSCOC_T00021883001	Dof zinc finger	-0.96855
Cc06_g03460	GSCOC_T00023630001	Two-component response regulator-like APRR7	-0.968457
Cc02_g14730	GSCOC_T00013893001	Uncharacterized metal-dependent hydrolase	-0.967444
Cc08_g11490	GSCOC_T00027151001	50S ribosomal L19- chloroplastic	-0.966683
Cc08_g12040	GSCOC_T00030536001	Homeobox-leucine zipper HAT4	-0.966601
Cc06_g11110	GSCOC_T00041696001	Pentatricopeptide repeat-containing At2g27610	-0.966144
Cc02_g33910	GSCOC_T00008637001	domain-containing chloroplastic	-0.965088
Cc09_g04570	GSCOC_T00017410001	Endoglucanase 24	-0.964938
Cc00_g14200	GSCOC_T00009214001	Probable tRNA (guanine(26)-N(2))-dimethyltransferase 1	-0.96385
Cc02_g35010	GSCOC_T00011811001	Pentatricopeptide repeat-containing At1g09820	-0.96363
Cc11_g13930	GSCOC_T00032123001	Uncharacterized protein	-0.96358
Cc02_g11370	GSCOC_T00029419001	Nucleolar complex 2 homolog	-0.963114
Cc08_g06990	GSCOC_T00025290001	Phospholipase D Y	-0.962465
Cc07_g03200	GSCOC_T00039538001	Probable serine threonine- kinase PIX7	-0.962222
Cc02_g38560	GSCOC_T00027847001	Pentatricopeptide repeat-containing mitochondrial	-0.962218
Cc05_g02550	GSCOC_T00020938001	Adenylosuccinate lyase	-0.961897
Cc05_g13870	GSCOC_T00021007001	Uncharacterized protein	-0.961864
Cc00_g32050	GSCOC_T00009619001	Uncharacterized protein	-0.96184
Cc11_g12220	GSCOC_T00032345001	Alpha-	-0.961782
Cc02_g17080	GSCOC_T00014213001	Uncharacterized protein	-0.961731
Cc02_g31090	GSCOC_T00027622001	Ankyrin repeat domain-containing chloroplastic	-0.961261
Cc11_g10570	GSCOC_T00032560001	Probable leucine-rich repeat receptor kinase At2g28990	-0.961258
Cc09_g00240	GSCOC_T00017973001	Transcription termination factor mitochondrial	-0.96108
Cc06_g21130	GSCOC_T00034077001	Digestive organ expansion factor homolog	-0.961078
Cc10_g01600	GSCOC_T00024643001	Peptidyl-prolyl cis-trans isomerase	-0.960644
Cc00_g18160	GSCOC_T00004638001	Sodium hydrogen exchanger 3	-0.959838
Cc02_g39340	GSCOC_T00027729001	Clustered mitochondria homolog	-0.958963
Cc04_g04760	GSCOC_T00022211001	UPF0481 At3g02645	-0.957679
Cc02_g38440	GSCOC_T00027862001	50S ribosomal chloroplastic	-0.957465
Cc10_g03310	GSCOC_T00024854001	Geranylgeranyl pyrophosphate chloroplastic	-0.956988
Cc08_g12990	GSCOC_T00030400001	Probable ATP-dependent RNA helicase DHX37	-0.956723
Cc09_g07890	GSCOC_T00003775001	N-acetyl-D-glucosamine kinase	-0.956133
Cc11_g08910	GSCOC_T00032812001	ABC transporter G family member 21	-0.956038
Cc07_g09840	GSCOC_T00037191001	GTPase Era	-0.955581
Cc04_g06090	GSCOC_T00022390001	Surfeit locus 1-like	-0.955139
Cc00_g25440	GSCOC_T00011328001	Uncharacterized protein	-0.954693
Cc08_g12550	GSCOC_T00030466001	Small heat shock chloroplastic	-0.954412
Cc11_g04720	GSCOC_T00042899001	chloroplastic	-0.953536
Cc07_g07480	GSCOC_T00040097001	Pentatricopeptide repeat-containing At3g49710	-0.953256
Cc05_g09820	GSCOC_T00021535001	Glucose-1-phosphate adenylyltransferase small chloroplastic	-0.95317
Cc11_g06240	GSCOC_T00020628001	Uncharacterized protein	-0.953092
Cc00_g21500	GSCOC_T00008526001	UDP-glucose flavonoid 3-O-glucosyltransferase 6	-0.952699
Cc00_g03040	GSCOC_T00004329001	Uncharacterized protein	-0.951994
Cc01_g06200	GSCOC_T00029978001	Hexokinase-3	-0.95115
Cc08_g05540	GSCOC_T00024328001	Pentatricopeptide repeat-containing At1g31790	-0.951028
Cc06_g17030	GSCOC_T00012645001	disease resistance RGA1	-0.950507
Cc05_g14300	GSCOC_T00038835001	Trigger factor Chloroplastic	-0.95007
Cc10_g01650	GSCOC_T00024648001	Uncharacterized protein	-0.949599
Cc02_g11880	GSCOC_T00029360001	Pentatricopeptide repeat-containing mitochondrial	-0.949438
Cc02_g10940	GSCOC_T00029473001	Ribosomal large subunit pseudouridine synthase B	-0.949206
Cc08_g00390	GSCOC_T00038528001	Cysteine--tRNA ligase	-0.949106
Cc03_g08210	GSCOC_T00033219001	UPF0481 At3g47200	-0.948742
Cc11_g04410	GSCOC_T00004785001	Pyridine nucleotide-disulfide oxidoreductase domain-containing 2	-0.948353
Cc05_g11190	GSCOC_T00021347001	Uncharacterized protein	-0.947753
Cc04_g10880	GSCOC_T00042663001	Integrator complex subunit 7	-0.947064
Cc05_g01600	GSCOC_T00018256001	Uncharacterized protein	-0.946788
Cc04_g02960	GSCOC_T00021980001	Malonate-- ligase	-0.946692
Cc10_g02280	GSCOC_T00024728001	GTPase Obg	-0.946413
Cc06_g21590	GSCOC_T00001548001	Trigger factor	-0.946162
Cc09_g07290	GSCOC_T00036285001	Alpha-glucosidase	-0.945685
Cc04_g01050	GSCOC_T00021737001	Uncharacterized protein	-0.945095
Cc02_g00290	GSCOC_T00019805001	SMG9	-0.944005
Cc08_g13250	GSCOC_T00030365001	Peptidyl-tRNA hydrolase mitochondrial	-0.943944
Cc00_g25870	GSCOC_T00011906001	Uncharacterized protein	-0.943839
Cc00_g06340	GSCOC_T00004107001	Serine carboxypeptidase-like 2	-0.943839
Cc11_g11690	GSCOC_T00032412001	Nucleolar 14	-0.943631
Cc02_g17090	GSCOC_T00014214001	Uncharacterized protein	-0.943207
Cc02_g20870	GSCOC_T00014709001	Fructose-	-0.942805
Cc11_g12470	GSCOC_T00032313001	Cell division topological specificity factor chloroplastic	-0.942111
Cc02_g15750	GSCOC_T00014034001	Uncharacterized protein	-0.941979
Cc02_g05750	GSCOC_T00039091001	sodium-coupled neutral amino acid transporter 7	-0.941544
Cc09_g04560	GSCOC_T00017411001	Endoglucanase 24	-0.940817
Cc01_g12190	GSCOC_T00028146001	Pentatricopeptide repeat-containing mitochondrial	-0.940478
Cc10_g14850	GSCOC_T00033639001	Periodic tryptophan 2 homolog	-0.940302
Cc10_g12110	GSCOC_T00031898001	Germin subfamily 1 member 7	-0.940146
Cc00_g15160	GSCOC_T00008855001	Zinc finger 6	-0.939529
Cc07_g05900	GSCOC_T00039876001	Methionine aminopeptidase chloroplastic mitochondrial	-0.938873
Cc06_g17650	GSCOC_T00040348001	ABC transporter A family member 1	-0.938411
Cc01_g18980	GSCOC_T00016120001	Pentatricopeptide repeat-containing chloroplastic	-0.937608
Cc08_g14750	GSCOC_T00035381001	Mitoferrin	-0.937379
Cc02_g25710	GSCOC_T00028709001	Pentatricopeptide repeat-containing At4g02750	-0.937223
Cc07_g04860	GSCOC_T00039747001	ATP-dependent zinc metalloprotease 3	-0.936636
Cc08_g01780	GSCOC_T00038336001	Probable purine permease 10	-0.9363
Cc02_g34400	GSCOC_T00000681001	F-box LRR-repeat 3	-0.936241
Cc00_g21520	GSCOC_T00008528001	UDP-glycosyltransferase 71B1	-0.935998
Cc03_g05670	GSCOC_T00026332001	Uncharacterized protein	-0.935937
Cc05_g08720	GSCOC_T00016902001	Uncharacterized protein	-0.935252
Cc01_g16760	GSCOC_T00016403001	Oleoyl-acyl carrier chloroplastic (Fragment)	-0.93495
Cc09_g09500	GSCOC_T00003714001	Chlorophyll a-b binding chloroplastic	-0.934948
Cc02_g28480	GSCOC_T00009428001	U3 small nucleolar RNA-associated 21 homolog	-0.934009
Cc01_g09730	GSCOC_T00024037001	Stress-response A B barrel domain-containing At5g22580	-0.933901
Cc00_g04020	GSCOC_T00013727001	Armadillo repeat-containing 7	-0.933592
Cc09_g03960	GSCOC_T00017482001	Peptide chain release factor 2	-0.932242
Cc04_g03800	GSCOC_T00022087001	Plastidic ATP ADP-transporter	-0.931887
Cc09_g06050	GSCOC_T00033371001	Pentatricopeptide repeat-containing mitochondrial	-0.931822
Cc01_g03910	GSCOC_T00040891001	G-type lectin S-receptor-like serine threonine- kinase RLK1	-0.931591
Cc02_g21030	GSCOC_T00014735001	Root phototropism 3	-0.931197
Cc01_g16220	GSCOC_T00016468001	Uncharacterized protein	-0.930926
Cc04_g02330	GSCOC_T00021903001	Uncharacterized protein	-0.930736
Cc03_g12910	GSCOC_T00030639001	Uncharacterized protein	-0.930618
Cc06_g21250	GSCOC_T00018121001	Uncharacterized protein	-0.930075
Cc02_g11170	GSCOC_T00029446001	Nucleolar pre-ribosomal-associated 1	-0.929281
Cc03_g08040	GSCOC_T00033192001	Uncharacterized protein	-0.928787
Cc09_g07030	GSCOC_T00036326001	Pentatricopeptide repeat-containing chloroplastic	-0.927805
Cc02_g32700	GSCOC_T00001205001	-lysine N-methyltransferase EEF2KMT	-0.927727
Cc05_g08960	GSCOC_T00016937001	G-type lectin S-receptor-like serine threonine- kinase SD2-5	-0.927632
Cc06_g01480	GSCOC_T00023367001	RNA polymerase II C-terminal domain phosphatase-like 2	-0.927423
Cc02_g16950	GSCOC_T00014197001	Fructose-bisphosphate aldolase chloroplastic	-0.927306
Cc03_g06980	GSCOC_T00026530001	Myosin-J heavy chain	-0.927095
Cc10_g11150	GSCOC_T00018441001	Stromal 70 kDa heat shock-related chloroplastic	-0.926711
Cc00_g15840	GSCOC_T00011230001	Pentatricopeptide repeat-containing chloroplastic	-0.925994
Cc07_g07640	GSCOC_T00040115001	LRR receptor-like serine threonine- kinase HSL2	-0.92595
Cc05_g10440	GSCOC_T00021441001	Pentatricopeptide repeat-containing mitochondrial	-0.925874
Cc02_g00490	GSCOC_T00019832001	5 -3 exoribonuclease 4	-0.925513
Cc05_g08440	GSCOC_T00016866001	Phospholipase A1-II 5	-0.925452
Cc01_g12240	GSCOC_T00028154001	Bifunctional riboflavin biosynthesis RIBA chloroplastic	-0.92505
Cc11_g16140	GSCOC_T00038147001	1-aminocyclopropane-1-carboxylate deaminase	-0.925021
Cc05_g16500	GSCOC_T00038551001	Metal tolerance 10	-0.924846
Cc01_g14690	GSCOC_T00028478001	Gamma-interferon-inducible lysosomal thiol reductase	-0.923957
Cc10_g04000	GSCOC_T00034990001	Polyadenylate-binding RBP47	-0.923332
Cc01_g14710	GSCOC_T00028481001	Glucan endo-	-0.92329
Cc03_g03900	GSCOC_T00026091001	VERNALIZATION INSENSITIVE 3	-0.923157
Cc02_g25020	GSCOC_T00028811001	Pentatricopeptide repeat-containing At2g44880	-0.923086
Cc01_g17650	GSCOC_T00016297001	Uncharacterized protein	-0.923031
Cc05_g05150	GSCOC_T00035070001	Cyclin-U1-1	-0.923028
Cc10_g06740	GSCOC_T00034617001	Serine--tRNA ligase	-0.92239
Cc02_g26190	GSCOC_T00028641001	Pentatricopeptide repeat-containing chloroplastic	-0.922207
Cc07_g08670	GSCOC_T00040253001	Chloroplastic group IIA intron splicing facilitator chloroplastic	-0.921444
Cc07_g08790	GSCOC_T00040268001	Bifunctional epoxide hydrolase 2	-0.92119
Cc02_g26930	GSCOC_T00025004001	GTP 3	-0.920955
Cc04_g14920	GSCOC_T00040777001	RUS1 family C16orf58 homolog	-0.920751
Cc05_g12540	GSCOC_T00021178001	Peptidyl-prolyl cis-trans isomerase chloroplastic	-0.920711
Cc10_g02380	GSCOC_T00024739001	Cytokinin dehydrogenase 5	-0.920631
Cc02_g14480	GSCOC_T00013859001	Uncharacterized protein	-0.92055
Cc04_g08730	GSCOC_T00022747001	Rhodanese-like domain-containing chloroplastic	-0.919919
Cc08_g01070	GSCOC_T00038433001	Uncharacterized protein	-0.919769
Cc06_g12370	GSCOC_T00041545001	Ankyrin repeat and SAM domain-containing 1A	-0.919491
Cc09_g04220	GSCOC_T00017453001	Pyridoxal phosphate phosphatase	-0.918295
Cc03_g05990	GSCOC_T00026374001	RNA-binding Musashi homolog Rbp6	-0.91819
Cc00_g09800	GSCOC_T00004629001	Uncharacterized protein	-0.917804
Cc10_g08450	GSCOC_T00034388001	Uncharacterized protein	-0.917435
Cc08_g15340	GSCOC_T00035463001	LURP-one-related 17	-0.91722
Cc04_g05910	GSCOC_T00022364001	ATP-dependent Clp protease ATP-binding subunit homolog chloroplastic	-0.916837
Cc08_g15550	GSCOC_T00035492001	Cation H(+) antiporter 18	-0.916642
Cc06_g06710	GSCOC_T00031349001	Nuclear transcription factor Y subunit A-2	-0.915482
Cc02_g29420	GSCOC_T00018365001	Pentatricopeptide repeat-containing mitochondrial	-0.915284
Cc05_g07080	GSCOC_T00042230001	Pentatricopeptide repeat-containing At1g02150	-0.915007
Cc02_g32540	GSCOC_T00001232001	Sugar transporter ERD6-like 5	-0.914812
Cc07_g20540	GSCOC_T00015721001	CCR4-NOT transcription complex subunit 11	-0.914304
Cc07_g03130	GSCOC_T00039531001	Translation factor GUF1 mitochondrial	-0.914158
Cc02_g32610	GSCOC_T00001217001	Uncharacterized protein	-0.913657
Cc02_g24460	GSCOC_T00028882001	Terminal nucleotidyltransferase 4A	-0.913143
Cc11_g05330	GSCOC_T00020479001	Flavonol 7-O-beta-glucosyltransferase UGT74F1	-0.913068
Cc00_g15080	GSCOC_T00008519001	Ocs element-binding factor 1	-0.912831
Cc09_g00100	GSCOC_T00017991001	Uncharacterized protein	-0.912824
Cc04_g03830	GSCOC_T00022092001	Uncharacterized hydrolase	-0.912714
Cc06_g19130	GSCOC_T00028964001	Ferredoxin-dependent glutamate chloroplastic	-0.912532
Cc02_g02480	GSCOC_T00020103001	Uncharacterized membrane	-0.912448
Cc07_g04020	GSCOC_T00039652001	Pentatricopeptide repeat-containing At3g29290	-0.91208
Cc10_g01240	GSCOC_T00024594001	6-hydroxynicotinate 3-monooxygenase	-0.911789
Cc11_g15390	GSCOC_T00038049001	F-box kelch-repeat At1g23390	-0.911573
Cc02_g37830	GSCOC_T00027939001	Uncharacterized protein	-0.911388
Cc02_g05760	GSCOC_T00039093001	Sodium-coupled neutral amino acid transporter 3	-0.911308
Cc03_g04940	GSCOC_T00026225001	Pentatricopeptide repeat-containing chloroplastic	-0.910979
Cc10_g02420	GSCOC_T00024744001	GTPase	-0.910891
Cc03_g03910	GSCOC_T00026092001	Uncharacterized protein	-0.910768
Cc08_g15530	GSCOC_T00035489001	chloroplastic	-0.910419
Cc11_g16250	GSCOC_T00038161001	Uncharacterized protein	-0.909495
Cc07_g00680	GSCOC_T00019146001	Triacylglycerol lipase 2	-0.909155
Cc03_g09830	GSCOC_T00030973001	late blight resistance homolog R1B-17	-0.908452
Cc09_g08220	GSCOC_T00020762001	U3 small nucleolar RNA-interacting 2	-0.908452
Cc01_g05340	GSCOC_T00011435001	Enoyl-acyl-carrier- reductas	-0.908441
Cc01_g13720	GSCOC_T00028349001	Uncharacterized protein	-0.907708
Cc05_g11750	GSCOC_T00021274001	pentatricopeptide repeat-containing At3g15200	-0.907506
Cc02_g32200	GSCOC_T00012954001	Uncharacterized protein	-0.907413
Cc07_g17000	GSCOC_T00037487001	Auxin-induced 5NG4	-0.90694
Cc06_g18640	GSCOC_T00040488001	methyltransferase DDB_G0268948	-0.906727
Cc04_g16120	GSCOC_T00042403001	Pentatricopeptide repeat-containing At5g02860	-0.906678
Cc10_g08030	GSCOC_T00034449001	Receptor kinase 5	-0.906638
Cc01_g15860	GSCOC_T00016509001	Rhodanese-like domain-containing chloroplastic	-0.906376
Cc04_g10850	GSCOC_T00042658001	Alpha beta hydrolase domain-containing 17C	-0.904965
Cc09_g08310	GSCOC_T00020779001	Cationic amino acid transporter 1	-0.904875
Cc08_g16480	GSCOC_T00035610001	Uncharacterized protein	-0.904373
Cc10_g05180	GSCOC_T00034845001	Uncharacterized protein	-0.904167
Cc07_g15090	GSCOC_T00036519001	50S ribosomal chloroplastic	-0.9041
Cc02_g24080	GSCOC_T00015121001	Pentatricopeptide repeat-containing mitochondrial	-0.90341
Cc03_g06820	GSCOC_T00026502001	Carboxyl-terminal-processing protease	-0.903292
Cc09_g06950	GSCOC_T00036343001	Probable caffeine synthase 4	-0.903093
Cc01_g19420	GSCOC_T00016060001	Ribosome-recycling chloroplastic (Fragment)	-0.902488
Cc07_g00440	GSCOC_T00019115001	Trihelix transcription factor GT-1	-0.90223
Cc00_g20700	GSCOC_T00001287001	Uncharacterized protein	-0.901849
Cc05_g14700	GSCOC_T00038789001	Transcription termination factor mitochondrial	-0.901655
Cc03_g00060	GSCOC_T00025578001	F-box LRR-repeat At3g28410	-0.90124
Cc08_g03270	GSCOC_T00010792001	Shikimate kinase	-0.900541
Cc01_g08760	GSCOC_T00023911001	Bifunctional nitrilase nitrile hydratase NIT4B	-0.900285
Cc00_g01650	GSCOC_T00002754001	Ribosomal mitochondrial	-0.900255
Cc06_g02910	GSCOC_T00023559001	Pentatricopeptide repeat-containing chloroplastic	-0.900093
Cc02_g25150	GSCOC_T00028786001	Glycine--tRNA chloroplastic mitochondrial 2	-0.900024
Cc09_g01590	GSCOC_T00017788001	Uncharacterized protein	-0.899937
Cc07_g16440	GSCOC_T00037562001	LRR receptor-like serine threonine- kinase GSO1	-0.899927
Cc06_g01410	GSCOC_T00023359001	Probable envelope AD	-0.899916
Cc05_g12670	GSCOC_T00021160001	Cytochrome c-type biogenesis ccda-like chloroplastic 2	-0.899888
Cc01_g06560	GSCOC_T00030045001	Uncharacterized protein	-0.899803
Cc09_g03260	GSCOC_T00017573001	Uncharacterized protein	-0.899033
Cc02_g32180	GSCOC_T00012951001	Pentatricopeptide repeat-containing mitochondrial	-0.898438
Cc04_g00070	GSCOC_T00021605001	Adenine nucleotide transporter chloroplastic amyloplastic mitochondrial	-0.898294
Cc09_g00190	GSCOC_T00017980001	BTB POZ domain-containing At5g47800	-0.898021
Cc07_g19630	GSCOC_T00018537001	GTPase Der	-0.896405
Cc00_g18490	GSCOC_T00005333001	Codeine O-demethylase	-0.895775
Cc00_g32700	GSCOC_T00005667001	Disease resistance RGA2	-0.893918
Cc01_g00990	GSCOC_T00038001001	Chaperone	-0.893839
Cc02_g08040	GSCOC_T00029858001	Heat shock cognate 70 kDa 2	-0.892916
Cc02_g32800	GSCOC_T00016699001	Uncharacterized protein	-0.892905
Cc04_g02460	GSCOC_T00021918001	Uncharacterized protein	-0.8929
Cc05_g00580	GSCOC_T00017098001	Uncharacterized protein	-0.892797
Cc10_g07220	GSCOC_T00034551001	Mitochondrial substrate carrier family B	-0.892114
Cc05_g09950	GSCOC_T00021520001	Uncharacterized protein	-0.892058
Cc06_g12350	GSCOC_T00041547001	Caskin-1	-0.891944
Cc07_g19040	GSCOC_T00018647001	pentatricopeptide repeat-containing mitochondrial	-0.891725
Cc11_g06550	GSCOC_T00020672001	late blight resistance homolog R1A-6	-0.891554
Cc07_g11480	GSCOC_T00036997001	Cation H(+) antiporter 15	-0.891389
Cc00_g14180	GSCOC_T00009212001	Cytochrome P450 85A1	-0.890647
Cc08_g15610	GSCOC_T00035500001	ABC transporter C family member 10	-0.890403
Cc02_g35460	GSCOC_T00042846001	Inactive glucose-6-phosphate 1-dehydrogenase chloroplastic	-0.89018
Cc11_g16150	GSCOC_T00038148001	SDA1 homolog	-0.889812
Cc07_g07900	GSCOC_T00040152001	Nodulation receptor kinase	-0.88969
Cc08_g04090	GSCOC_T00034215001	TOPLESS	-0.8895
Cc00_g12450	GSCOC_T00005352001	Gibberellin 20 oxidase 1	-0.889051
Cc11_g00900	GSCOC_T00019681001	Small ribosomal subunit biogenesis GTPase	-0.888783
Cc06_g23440	GSCOC_T00040571001	Uncharacterized protein	-0.88865
Cc00_g03580	GSCOC_T00009910001	Uncharacterized protein	-0.888013
Cc02_g18910	GSCOC_T00014451001	Probable receptor kinase At1g49730	-0.888001
Cc04_g04520	GSCOC_T00022177001	AC transposase	-0.887687
Cc00_g30360	GSCOC_T00012871001	39S ribosomal mitochondrial	-0.887379
Cc09_g09570	GSCOC_T00004077001	Carboxyl-terminal-processing protease	-0.887289
Cc06_g05400	GSCOC_T00043088001		-0.886739
Cc10_g02390	GSCOC_T00024740001	Ribosomal RNA small subunit methyltransferase I	-0.886587
Cc02_g08120	GSCOC_T00029843001	Bifunctional uridylyltransferase uridylyl-removing enzyme	-0.886068
Cc02_g24110	GSCOC_T00015124001	Arginase mitochondrial	-0.885952
Cc04_g05100	GSCOC_T00022255001	Uncharacterized protein	-0.885805
Cc07_g17890	GSCOC_T00018832001	Uridylate kinase	-0.885202
Cc07_g06830	GSCOC_T00040008001	Casein kinase II subunit alpha-1	-0.884567
Cc02_g18430	GSCOC_T00014387001	Pentatricopeptide repeat-containing chloroplastic	-0.884352
Cc04_g09310	GSCOC_T00022814001	Guanine nucleotide-binding alpha-1 subunit	-0.88382
Cc06_g01210	GSCOC_T00023333001	Syntaxin-binding 5	-0.883763
Cc05_g02950	GSCOC_T00033472001	pentatricopeptide repeat-containing mitochondrial	-0.883365
Cc05_g11120	GSCOC_T00021356001	Uroporphyrinogen decarboxylase chloroplastic	-0.882929
Cc11_g17460	GSCOC_T00038318001	Zinc finger CONSTANS-LIKE 15	-0.882017
Cc00_g25560	GSCOC_T00012894001	disease resistance RGA3	-0.881571
Cc11_g15310	GSCOC_T00038041001	Pyrrolidone-carboxylate peptidase	-0.881484
Cc05_g12340	GSCOC_T00021202001	Stem-specific TSJT1	-0.880952
Cc07_g07410	GSCOC_T00040090001	DEAD-box ATP-dependent RNA helicase 16	-0.880344
Cc02_g11050	GSCOC_T00029461001	Thioredoxin-like 3- chloroplastic	-0.879989
Cc05_g09040	GSCOC_T00002679001	Probable LRR receptor-like serine threonine- kinase At1g07650	-0.879381
Cc11_g17320	GSCOC_T00038296001	5 -deoxyadenosine deaminase	-0.878853
Cc02_g33720	GSCOC_T00015419001	Serine threonine- kinase PBS1	-0.878692
Cc02_g04680	GSCOC_T00020387001	Uncharacterized protein At3g06530	-0.878283
Cc00_g09520	GSCOC_T00004381001	Uncharacterized protein	-0.877583
Cc01_g02530	GSCOC_T00009689001	Uncharacterized protein	-0.877575
Cc07_g15690	GSCOC_T00036443001	Uncharacterized protein	-0.877378
Cc03_g04090	GSCOC_T00026116001	Pentatricopeptide repeat-containing mitochondrial	-0.876843
Cc00_g03280	GSCOC_T00011596001	Pre-mRNA-processing factor 39	-0.876018
Cc10_g00440	GSCOC_T00024494001	Glutamate receptor	-0.875975
Cc07_g21420	GSCOC_T00016965001	Uncharacterized protein	-0.87594
Cc08_g05430	GSCOC_T00024307001	Alpha-glucosidase 2	-0.875696
Cc06_g08670	GSCOC_T00031100001	Uncharacterized protein	-0.875123
Cc03_g08110	GSCOC_T00033203001	eEF1A lysine and N-terminal methyltransferase	-0.875081
Cc06_g00920	GSCOC_T00023296001	Uncharacterized protein	-0.874939
Cc10_g09990	GSCOC_T00031474001	NRT1 PTR FAMILY	-0.874245
Cc09_g00560	GSCOC_T00017931001	Uncharacterized protein	-0.874151
Cc02_g20650	GSCOC_T00014683001	Uncharacterized protein	-0.873548
Cc11_g14200	GSCOC_T00032091001	NLR family CARD domain-containing 3	-0.873044
Cc08_g16040	GSCOC_T00035552001	Mitochondrial inner membrane OXA1	-0.872677
Cc04_g10360	GSCOC_T00042584001	3-oxoacyl	-0.872567
Cc07_g09660	GSCOC_T00037213001	Transcription factor bHLH63	-0.872551
Cc07_g04240	GSCOC_T00039676001	Uncharacterized protein	-0.872492
Cc05_g09650	GSCOC_T00021556001	Chlorophyll a-b binding chloroplastic (Fragments)	-0.871515
Cc02_g06360	GSCOC_T00039164001	Gibberellin 2-beta-dioxygenase 3	-0.870403
Cc08_g02630	GSCOC_T00037743001	Carboxylesterase 1	-0.870368
Cc06_g07520	GSCOC_T00031251001	Uncharacterized protein	-0.870157
Cc03_g06310	GSCOC_T00026421001	eEF1A lysine and N-terminal methyltransferase	-0.869982
Cc05_g15390	GSCOC_T00038698001		-0.869931
Cc08_g09880	GSCOC_T00026942001	Tryptophan--tRNA ligase	-0.869293
Cc02_g03830	GSCOC_T00020282001	Probable aminotransferase ACS12	-0.869256
Cc11_g13650	GSCOC_T00032155001	Pentatricopeptide repeat-containing chloroplastic mitochondrial	-0.869242
Cc06_g18460	GSCOC_T00040462001	Uncharacterized protein YqeH	-0.869105
Cc00_g17990	GSCOC_T00010352001	Ribosomal RNA small subunit methyltransferase E	-0.868575
Cc05_g10750	GSCOC_T00021401001	50S ribosomal chloroplastic	-0.868528
Cc11_g03860	GSCOC_T00033995001	late blight resistance homolog R1B-14	-0.86851
Cc02_g27820	GSCOC_T00025132001	TRANSPARENT TESTA 1	-0.868446
Cc06_g01640	GSCOC_T00023392001	Pentatricopeptide repeat-containing At3g09060	-0.868082
Cc06_g09090	GSCOC_T00041965001	Pentatricopeptide repeat-containing At1g31430	-0.867824
Cc03_g15430	GSCOC_T00026822001	disease resistance RGA3	-0.867821
Cc01_g05050	GSCOC_T00028591001	Uncharacterized protein	-0.867597
Cc06_g08290	GSCOC_T00031150001	Thylakoid lumenal kDa chloroplastic	-0.867596
Cc11_g03340	GSCOC_T00025429001	ACCUMULATION AND REPLICATION OF CHLOROPLASTS 3	-0.867555
Cc04_g03040	GSCOC_T00021991001	30S ribosomal chloroplastic	-0.866667
Cc06_g01310	GSCOC_T00023346001	Rhodanese-like domain-containing 10	-0.866558
Cc11_g11810	GSCOC_T00032395001	Folic acid synthesis fol1	-0.866299
Cc02_g15440	GSCOC_T00013990001	Pentatricopeptide repeat-containing chloroplastic	-0.865736
Cc02_g06920	GSCOC_T00039246001	Uncharacterized protein	-0.865352
Cc02_g39180	GSCOC_T00027751001	Abscisic acid receptor PYL9	-0.865288
Cc03_g13750	GSCOC_T00031730001	Pentatricopeptide repeat-containing chloroplastic	-0.864718
Cc10_g10330	GSCOC_T00031427001	Uncharacterized protein	-0.864638
Cc11_g10550	GSCOC_T00032563001	Methionine aminopeptidase chloroplastic	-0.864459
Cc04_g12130	GSCOC_T00005259001	U3 small nucleolar ribonucleo MPP10	-0.864129
Cc05_g14280	GSCOC_T00038837001		-0.864123
Cc06_g20200	GSCOC_T00022932001	Peptidyl-prolyl cis-trans isomerase FKBP16- chloroplastic	-0.863993
Cc10_g16310	GSCOC_T00033850001	Uncharacterized protein	-0.863888
Cc03_g06620	GSCOC_T00026473001	26S proteasome non-ATPase regulatory subunit 1	-0.863814
Cc11_g02370	GSCOC_T00032980001	Uncharacterized protein	-0.863813
Cc00_g33650	GSCOC_T00012137001	Actin-related 4	-0.863719
Cc07_g04380	GSCOC_T00039694001	ABC transporter B family member 27	-0.863453
Cc04_g09240	GSCOC_T00022807001	Pentatricopeptide repeat-containing mitochondrial	-0.863414
Cc00_g07610	GSCOC_T00006750001	Uncharacterized protein	-0.863316
Cc10_g06720	GSCOC_T00034619001	Thylakoid lumenal 29 kDa chloroplastic	-0.863186
Cc07_g09860	GSCOC_T00037189001	Pentatricopeptide repeat-containing At2g27610	-0.863083
Cc00_g13960	GSCOC_T00010017001	Pentatricopeptide repeat-containing At2g33680	-0.86304
Cc06_g18860	GSCOC_T00028924001	pentatricopeptide repeat-containing mitochondrial	-0.862815
Cc10_g15470	GSCOC_T00033728001	Phosphoribosylaminoimidazole-succinocarboxamide chloroplastic	-0.860893
Cc10_g01040	GSCOC_T00024568001	Glutathione S-transferase PARB	-0.860716
Cc05_g15140	GSCOC_T00038725001	DNA-directed RNA polymerases I and III subunit RPAC1	-0.860686
Cc06_g14400	GSCOC_T00041261001	5 -nucleotidase domain-containing DDB_G0275467	-0.860537
Cc06_g12360	GSCOC_T00041546001	Ankyrin repeat-containing ITN1	-0.860418
Cc02_g03910	GSCOC_T00020293001	Peptidyl-prolyl cis-trans isomerase FKBP53	-0.860137
Cc02_g11900	GSCOC_T00029358001	Pentatricopeptide repeat-containing mitochondrial	-0.860064
Cc06_g05770	GSCOC_T00043143001	pentatricopeptide repeat-containing At3g08820	-0.86003
Cc00_g07370	GSCOC_T00001103001	Lysine-specific demethylase 3B	-0.859549
Cc07_g07870	GSCOC_T00040149001	Uncharacterized protein At4g37920	-0.859102
Cc09_g10070	GSCOC_T00041094001	Pentatricopeptide repeat-containing chloroplastic	-0.85903
Cc09_g10630	GSCOC_T00041021001	DETOXIFICATION chloroplastic	-0.858889
Cc07_g19610	GSCOC_T00018541001	Xanthine dehydrogenase 1	-0.858412
Cc02_g21880	GSCOC_T00014838001	Uncharacterized protein	-0.857905
Cc01_g06860	GSCOC_T00030089001	Probable ubiquitin-like-specific protease 2A	-0.857284
Cc00_g00750	GSCOC_T00036189001	F-box At5g07610	-0.857176
Cc05_g08340	GSCOC_T00016852001	Uncharacterized protein	-0.856941
Cc06_g12580	GSCOC_T00041520001	RRP12	-0.85618
Cc02_g17980	GSCOC_T00014330001	EEF1A lysine methyltransferase 4	-0.855871
Cc10_g02880	GSCOC_T00024797001	S-adenosyl-L-methionine-dependent tRNA 4-demethylwyosine synthase	-0.855772
Cc07_g01600	GSCOC_T00039333001	Pentatricopeptide repeat-containing chloroplastic	-0.855416
Cc03_g02290	GSCOC_T00025870001	CASP 1D1	-0.855384
Cc01_g08120	GSCOC_T00015503001	late blight resistance homolog R1B-14	-0.855299
Cc04_g11650	GSCOC_T00037367001	Pathogenesis-related leaf 6	-0.854803
Cc06_g10210	GSCOC_T00041816001	Probable glycosyltransferase At5g03795	-0.854737
Cc06_g02560	GSCOC_T00023513001	Uncharacterized ribonuclease sll1290	-0.8544
Cc05_g09550	GSCOC_T00021568001	Uncharacterized protein	-0.854367
Cc07_g14600	GSCOC_T00036596001	Homeobox-leucine zipper ATHB-6	-0.854009
Cc06_g02010	GSCOC_T00023441001	Uncharacterized protein	-0.853996
Cc04_g02720	GSCOC_T00021950001	ATP-dependent zinc metalloprotease 3	-0.853369
Cc00_g04250	GSCOC_T00010975001	Peptide deformylase chloroplastic	-0.852891
Cc07_g13790	GSCOC_T00036696001	Elongator complex 4	-0.852711
Cc07_g13560	GSCOC_T00036721001	Pentatricopeptide repeat-containing mitochondrial	-0.851426
Cc11_g15750	GSCOC_T00038093001	Uncharacterized protein	-0.851359
Cc01_g15060	GSCOC_T00016610001	tRNA pseudouridine synthase	-0.850961
Cc00_g21580	GSCOC_T00006599001	Glycine-rich	-0.850505
Cc03_g09080	GSCOC_T00042716001	Peptidyl-prolyl cis-trans isomerase FKBP65	-0.850348
Cc07_g10160	GSCOC_T00037153001	CDK5RAP1	-0.850312
Cc02_g38570	GSCOC_T00027846001	Proline iminopeptidase	-0.850304
Cc06_g17170	GSCOC_T00036347001	Uncharacterized protein	-0.850233
Cc03_g07000	GSCOC_T00026534001	7-hydroxymethyl chlorophyll a chloroplastic	-0.850043
Cc04_g07600	GSCOC_T00022590001	Translation initiation factor eIF-2B subunit delta	-0.849906
Cc04_g00420	GSCOC_T00021651001	Glutamate receptor	-0.849538
Cc07_g06450	GSCOC_T00039953001	Transcription factor MYB44	-0.849214
Cc08_g11340	GSCOC_T00027135001	Subtilisin-like protease	-0.848999
Cc05_g04830	GSCOC_T00035019001	Glutamate receptor	-0.848144
Cc00_g04090	GSCOC_T00013736001	pentatricopeptide repeat-containing mitochondrial	-0.848053
Cc07_g15140	GSCOC_T00036513001	Cyclin-dependent kinase C-1	-0.848033
Cc07_g07750	GSCOC_T00040135001	Uncharacterized protein	-0.848
Cc02_g08910	GSCOC_T00029730001	Uncharacterized protein	-0.847996
Cc07_g16460	GSCOC_T00037559001	Probable UDP-N-acetylglucosamine--peptide N-acetylglucosaminyltransferase SEC	-0.847879
Cc01_g11430	GSCOC_T00024273001	Uncharacterized protein	-0.847729
Cc07_g03730	GSCOC_T00039618001	Probable WRKY transcription factor 20	-0.847061
Cc02_g13140	GSCOC_T00029195001	RING-type E3 ubiquitin transferase C3H69	-0.846747
Cc01_g17900	GSCOC_T00016268001	Uncharacterized protein	-0.846719
Cc04_g09340	GSCOC_T00022817001	Potassium channel SKOR	-0.846411
Cc05_g00020	GSCOC_T00017009001	Cytochrome P450 chloroplastic	-0.845796
Cc02_g33660	GSCOC_T00015406001	Subtilisin-like protease	-0.84551
Cc01_g19010	GSCOC_T00016114001	Zinc finger NUTCRACKER	-0.845315
Cc11_g11320	GSCOC_T00032461001	chloroplastic	-0.845206
Cc05_g10280	GSCOC_T00021472001	Uncharacterized protein	-0.844642
Cc07_g14790	GSCOC_T00036568001	Probable serine threonine- kinase CST	-0.844525
Cc03_g16200	GSCOC_T00002108001	Serine threonine- kinase rio2	-0.844264
Cc01_g10470	GSCOC_T00024143001	-lysine methyltransferase METTL21D	-0.844203
Cc07_g01920	GSCOC_T00039370001	Polyribonucleotide nucleotidyltransferase	-0.844022
Cc02_g23500	GSCOC_T00015048001	Uncharacterized protein	-0.843546
Cc01_g00860	GSCOC_T00011081001	Tubulin alpha-1 chain	-0.843381
Cc01_g12250	GSCOC_T00028155001	RING-H2 finger ATL2	-0.843296
Cc04_g13180	GSCOC_T00018889001	Uncharacterized protein	-0.843145
Cc01_g14040	GSCOC_T00028391001	Uncharacterized protein	-0.843001
Cc01_g06000	GSCOC_T00027432001	Magnesium-chelatase subunit chloroplastic	-0.842921
Cc11_g07170	GSCOC_T00018091001	Transcription factor IIIA	-0.84272
Cc11_g08830	GSCOC_T00032821001	Transcription repressor MYB6	-0.84263
Cc06_g05700	GSCOC_T00043134001	Cell division homolog 2- chloroplastic	-0.842124
Cc02_g30340	GSCOC_T00018332001	Tricin synthase 1	-0.841868
Cc02_g35140	GSCOC_T00012344001	Chloroplast stem-loop binding of 41 kDa chloroplastic	-0.841797
Cc11_g16220	GSCOC_T00038158001	ALBINO3 chloroplastic	-0.841712
Cc06_g03470	GSCOC_T00023631001	Probable WRKY transcription factor 34	-0.84151
Cc06_g16080	GSCOC_T00030740001	Uncharacterized protein	-0.841371
Cc10_g01760	GSCOC_T00024663001	tRNA (adenine(58)-N(1))-methyltransferase non-catalytic subunit trm6	-0.841284
Cc07_g04870	GSCOC_T00039748001	Proline dehydrogenase mitochondrial	-0.841159
Cc02_g10470	GSCOC_T00029526001	Phosphoglucan phosphatase chloroplastic	-0.840741
Cc02_g35000	GSCOC_T00011810001	Lon protease mitochondrial	-0.840468
Cc04_g02750	GSCOC_T00021953001	isCO large subunit-binding subunit chloroplastic	-0.839626
Cc10_g07890	GSCOC_T00034469001	Pentatricopeptide repeat-containing At4g17616	-0.839588
Cc01_g18680	GSCOC_T00016170001	Pentatricopeptide repeat-containing mitochondrial	-0.839329
Cc07_g16950	GSCOC_T00037494001	Citrate-binding	-0.839203
Cc08_g16390	GSCOC_T00035598001	Uncharacterized protein	-0.838887
Cc05_g10830	GSCOC_T00021393001	Probable leucine-rich repeat receptor-like serine threonine- kinase At3g14840	-0.838824
Cc02_g17890	GSCOC_T00014319001	Probable 1-acyl-sn-glycerol-3-phosphate acyltransferase 5	-0.838436
Cc02_g10930	GSCOC_T00029474001	Kinesin KIN-UA	-0.838114
Cc06_g06700	GSCOC_T00031350001	33 kDa chloroplastic	-0.838036
Cc03_g01340	GSCOC_T00025744001	Pumilio homolog 24	-0.837231
Cc02_g23270	GSCOC_T00015015001	Phosphoribosylamine--glycine chloroplastic	-0.836954
Cc00_g22660	GSCOC_T00013102001	DEAD-box ATP-dependent RNA helicase 29	-0.836361
Cc02_g39710	GSCOC_T00027678001	Pentatricopeptide repeat-containing At5g08510	-0.835979
Cc09_g07010	GSCOC_T00036330001	Pentatricopeptide repeat-containing At4g21300	-0.835238
Cc08_g01870	GSCOC_T00037640001	Pentatricopeptide repeat-containing At3g29230	-0.834881
Cc04_g16980	GSCOC_T00035819001	-like helicase 1	-0.83378
Cc02_g08140	GSCOC_T00029841001	3-hydroxypropionyl-coenzyme A dehydratase	-0.832976
Cc02_g08380	GSCOC_T00029799001	Photosynthetic NDH subunit of lumenal location chloroplastic	-0.832221
Cc11_g09920	GSCOC_T00032650001	Glutamine--tRNA ligase	-0.83119
Cc08_g12110	GSCOC_T00030526001	Cytochrome P450 71D10	-0.831024
Cc00_g15210	GSCOC_T00005657001	Phosphoribosylformylglycinamidine cyclo- chloroplastic	-0.830318
Cc01_g05880	GSCOC_T00027415001	Uncharacterized protein At2g3766	-0.830256
Cc06_g04720	GSCOC_T00042993001	Carotene epsilon- chloroplastic	-0.829795
Cc08_g12400	GSCOC_T00030488001	Asparagine--tRNA chloroplastic mitochondrial	-0.829702
Cc03_g01900	GSCOC_T00025819001	Isoleucine--tRNA ligase	-0.829058
Cc07_g02330	GSCOC_T00039419001	Peptidyl-prolyl cis-trans chloroplastic	-0.828934
Cc02_g00670	GSCOC_T00019857001	Uncharacterized protein C16G5.07c	-0.828696
Cc07_g01440	GSCOC_T00019241001	Transcription-repair-coupling factor	-0.828649
Cc08_g04620	GSCOC_T00015665001	Uncharacterized protein	-0.82818
Cc00_g07620	GSCOC_T00006752001	-like helicase 1	-0.828078
Cc07_g00600	GSCOC_T00019138001	Ribosome-recycling factor	-0.827933
Cc08_g08400	GSCOC_T00007223001	TIC 20- chloroplastic	-0.827684
Cc00_g06120	GSCOC_T00003126001	Uncharacterized protein	-0.826935
Cc03_g11400	GSCOC_T00019338001	Glucose-6-phosphate 1- chloroplastic	-0.826346
Cc07_g07800	GSCOC_T00040140001	Uncharacterized protein	-0.82555
Cc10_g12920	GSCOC_T00035366001	Maltose excess 1- chloroplastic	-0.824849
Cc10_g12860	GSCOC_T00035376001	Uncharacterized protein	-0.824796
Cc07_g11030	GSCOC_T00037046001	Uncharacterized protein	-0.824717
Cc07_g17350	GSCOC_T00037442001	Trihelix transcription factor GT-2	-0.824135
Cc09_g01890	GSCOC_T00017749001	Pentatricopeptide repeat-containing mitochondrial	-0.823776
Cc03_g07920	GSCOC_T00033171001	Purple acid phosphatase 15	-0.823533
Cc00_g06180	GSCOC_T00010058001	Benzaldehyde dehydrogenase (NAD(+))	-0.823479
Cc10_g07600	GSCOC_T00034501001	Uncharacterized protein	-0.822858
Cc07_g18500	GSCOC_T00018744001	Magnesium-chelatase subunit chloroplastic	-0.82242
Cc11_g02970	GSCOC_T00025494001	Uncharacterized protein	-0.822418
Cc02_g22680	GSCOC_T00014945001	Probable inactive tRNA-specific adenosine deaminase 3	-0.821427
Cc02_g04040	GSCOC_T00020307001	Uncharacterized protein	-0.820682
Cc08_g05030	GSCOC_T00042456001	ATP-dependent Clp protease proteolytic subunit chloroplastic	-0.820662
Cc04_g02550	GSCOC_T00021928001	MMS19 nucleotide excision repair homolog	-0.820501
Cc03_g01370	GSCOC_T00025749001	Uncharacterized protein	-0.820211
Cc06_g17640	GSCOC_T00040347001	Pentatricopeptide repeat-containing chloroplastic	-0.819949
Cc03_g06340	GSCOC_T00026424001	Uncharacterized protein	-0.819932
Cc05_g06630	GSCOC_T00042164001	STRUBBELIG-RECEPTOR FAMILY 3	-0.81983
Cc06_g10400	GSCOC_T00041783001	Probable iron ascorbate oxidoreductase DDB_G0283291	-0.819113
Cc04_g04530	GSCOC_T00022178001	pentatricopeptide repeat-containing At3g15930	-0.81909
Cc06_g11070	GSCOC_T00041700001	Probable arginine N-methyltransferase 1	-0.818839
Cc07_g02900	GSCOC_T00039503001	pentatricopeptide repeat-containing At3g28640	-0.818685
Cc05_g06580	GSCOC_T00042155001	disease resistance RGA4	-0.81841
Cc02_g30890	GSCOC_T00023845001	G-type lectin S-receptor-like serine threonine- kinase At4g27290	-0.81791
Cc05_g02720	GSCOC_T00020893001	Zinc finger CCCH domain-containing 3	-0.817878
Cc02_g17640	GSCOC_T00014284001	Uncharacterized protein	-0.817706
Cc02_g19550	GSCOC_T00014523001	TRI1	-0.816901
Cc00_g34660	GSCOC_T00011935001	Gibberellin 20 oxidase 2	-0.81678
Cc06_g06730	GSCOC_T00031347001	Pentatricopeptide repeat-containing At4g39530	-0.81635
Cc10_g04960	GSCOC_T00034869001	Quinone oxidoreductase PIG3	-0.816314
Cc02_g01900	GSCOC_T00020027001	Uncharacterized protein	-0.816102
Cc00_g24160	GSCOC_T00010005001	Dihydrodipicolinate reductase chloroplastic	-0.815965
Cc08_g08950	GSCOC_T00017233001	GTP-binding At2g22870	-0.815636
Cc07_g13920	GSCOC_T00036677001	UDP-rhamnose:rhamnosyltransferase 1	-0.815434
Cc07_g19400	GSCOC_T00018591001	tRNase Z chloroplastic	-0.815389
Cc06_g16580	GSCOC_T00030668001	DNA-directed RNA polymerase I subunit rpa1	-0.815284
Cc05_g02110	GSCOC_T00018402001	Ribosomal RNA small subunit methyltransferase NEP1	-0.815163
Cc02_g22420	GSCOC_T00014913001	Uncharacterized protein	-0.81512
Cc02_g05260	GSCOC_T00039029001	Rhodanese-like domain-containing 7	-0.814818
Cc01_g19890	GSCOC_T00015999001	Uncharacterized protein	-0.814601
Cc05_g11740	GSCOC_T00021275001	30S ribosomal chloroplastic	-0.814551
Cc01_g17160	GSCOC_T00016357001	NHL repeat-containing 2	-0.814089
Cc01_g01800	GSCOC_T00037845001	disease resistance RGA4	-0.813897
Cc00_g10220	GSCOC_T00003162001	Uncharacterized protein	-0.813814
Cc08_g05440	GSCOC_T00024308001	Uncharacterized protein	-0.813766
Cc02_g23830	GSCOC_T00015087001	Bifunctional dihydroflavonol 4-reductase flavanone 4-reductase	-0.813727
Cc11_g00220	GSCOC_T00019447001	Probable galactinol--sucrose galactosyltransferase 2	-0.813038
Cc02_g05470	GSCOC_T00039056001	tRNA (guanine(26)-N(2))-dimethyltransferase	-0.813023
Cc02_g03060	GSCOC_T00020176001	Pentatricopeptide repeat-containing At3g29230	-0.812792
Cc03_g11980	GSCOC_T00015316001	Electron transfer flavo -ubiquinone mitochondrial	-0.812745
Cc09_g10520	GSCOC_T00041035001	Alanine--tRNA chloroplastic mitochondrial	-0.812644
Cc07_g15480	GSCOC_T00036471001	G-type lectin S-receptor-like serine threonine- kinase RLK1	-0.81251
Cc02_g03370	GSCOC_T00020220001	F-box At4g00755	-0.81224
Cc01_g14300	GSCOC_T00028427001	Chaperone	-0.81214
Cc04_g03160	GSCOC_T00022008001	Proline-rich receptor kinase PERK15	-0.812053
Cc00_g04050	GSCOC_T00013730001	Pentatricopeptide repeat-containing mitochondrial	-0.811417
Cc01_g00120	GSCOC_T00012424001	Pentatricopeptide repeat-containing mitochondrial	-0.811226
Cc02_g32780	GSCOC_T00016697001	Uncharacterized protein	-0.811093
Cc01_g06760	GSCOC_T00030076001	6-hydroxynicotinate 3-monooxygenase	-0.810692
Cc06_g04850	GSCOC_T00043010001	Peptidyl-prolyl cis-trans isomerase chloroplastic	-0.810689
Cc06_g06530	GSCOC_T00031371001	Uncharacterized protein	-0.810459
Cc01_g13150	GSCOC_T00028276001	Uncharacterized protein	-0.810408
Cc06_g17820	GSCOC_T00040373001	Zeatin O-glucosyltransferase	-0.810403
Cc05_g08680	GSCOC_T00016897001	F-box kelch-repeat At3g06240	-0.810251
Cc02_g35820	GSCOC_T00042785001	ABC transporter I family member chloroplastic	-0.81016
Cc10_g08520	GSCOC_T00034379001	Neuroguidin	-0.809915
Cc10_g01070	GSCOC_T00024573001	DNL-type zinc finger	-0.809882
Cc00_g07650	GSCOC_T00006756001	Glycerophosphodiester periplasmic	-0.809384
Cc11_g14190	GSCOC_T00032093001	IAA-amino acid hydrolase ILR1-like 2	-0.809364
Cc03_g09090	GSCOC_T00042714001	Pentatricopeptide repeat-containing mitochondrial	-0.809235
Cc06_g23030	GSCOC_T00040636001	Uncharacterized protein	-0.809223
Cc07_g15130	GSCOC_T00036515001	Calmodulin-binding transcription activator 2	-0.809034
Cc01_g09250	GSCOC_T00023972001	Serine carboxypeptidase-like 2	-0.808952
Cc11_g01130	GSCOC_T00019631001	Uncharacterized protein	-0.808697
Cc02_g32870	GSCOC_T00016712001	Uncharacterized protein	-0.808163
Cc02_g32500	GSCOC_T00001237001	Sugar transporter ERD6-like 5	-0.807706
Cc01_g09120	GSCOC_T00023956001	Ferredoxin- chloroplastic	-0.807469
Cc11_g10100	GSCOC_T00032623001	50S ribosomal chloroplastic	-0.807423
Cc09_g01900	GSCOC_T00017748001	Probable cardiolipin synthase (CMP-forming)	-0.806998
Cc02_g01260	GSCOC_T00019942001	Thylakoid lumenal kDa chloroplastic	-0.806699
Cc07_g05120	GSCOC_T00039774001	Pentatricopeptide repeat-containing At1g63330	-0.80653
Cc00_g35040	GSCOC_T00005762001	disease resistance RGA3	-0.805975
Cc07_g07250	GSCOC_T00040066001	-like 2	-0.805566
Cc08_g13130	GSCOC_T00030379001	Uncharacterized protein	-0.805439
Cc02_g12340	GSCOC_T00029297001	PAP-specific mitochondrial	-0.805395
Cc00_g10430	GSCOC_T00005154001	Subtilisin-like protease	-0.805393
Cc10_g06220	GSCOC_T00034689001	LL-diaminopimelate chloroplastic	-0.805101
Cc11_g14280	GSCOC_T00032079001	Uncharacterized protein	-0.804978
Cc00_g02840	GSCOC_T00011551001	Uncharacterized protein	-0.804802
Cc03_g04230	GSCOC_T00026133001	Chlorophyllase- chloroplastic	-0.804629
Cc00_g35880	GSCOC_T00010032001	disease resistance RGA1	-0.803408
Cc01_g21150	GSCOC_T00005017001	Programmed cell death 2	-0.803241
Cc02_g04350	GSCOC_T00020346001	NO-associated chloroplastic mitochondrial	-0.802999
Cc02_g09680	GSCOC_T00029622001	Bifunctional purine biosynthesis	-0.802676
Cc04_g05570	GSCOC_T00022317001	Tyrosyl-DNA phosphodiesterase 1	-0.802615
Cc00_g11980	GSCOC_T00010413001	MDIS1-interacting receptor like kinase 2	-0.802265
Cc11_g08950	GSCOC_T00032807001	Ribose-5-phosphate isomerase A	-0.801925
Cc02_g18180	GSCOC_T00014355001	Serine threonine- kinase SMG1	-0.801671
Cc05_g07250	GSCOC_T00042252001	Uncharacterized protein	-0.801561
Cc01_g19950	GSCOC_T00015993001	Uncharacterized protein	-0.801449
Cc02_g25610	GSCOC_T00028726001	10 kDa chaperonin	-0.801019
Cc01_g03310	GSCOC_T00033130001	Pentatricopeptide repeat-containing At1g33350	-0.800605
Cc00_g01350	GSCOC_T00010935001	late blight resistance homolog R1A-6	-0.800269
Cc02_g24950	GSCOC_T00028820001	Peptidyl-prolyl cis-trans isomerase FKBP20- chloroplastic	-0.800151
Cc00_g09420	GSCOC_T00009856001	Uncharacterized protein	-0.799819
Cc06_g07500	GSCOC_T00031253001	Probable phosphatase 2C 27	-0.799562
Cc00_g14390	GSCOC_T00010682001	Uncharacterized protein	-0.799263
Cc09_g01510	GSCOC_T00017799001	U3 small nucleolar RNA-associated 6 homolog	-0.798877
Cc02_g03400	GSCOC_T00020224001	Serine arginine-rich splicing factor RS40	-0.798624
Cc04_g07550	GSCOC_T00022582001	Transcription initiation factor TFIID subunit 2	-0.798596
Cc02_g34960	GSCOC_T00011806001	Peptide chain release factor 2	-0.798534
Cc06_g19140	GSCOC_T00028965001	Uncharacterized protein	-0.798292
Cc06_g02160	GSCOC_T00023463001	Uncharacterized protein	-0.798229
Cc01_g10610	GSCOC_T00024163001	Uncharacterized protein	-0.798134
Cc02_g27810	GSCOC_T00025131001	Uncharacterized protein	-0.797903
Cc04_g05310	GSCOC_T00022280001	Uncharacterized protein	-0.797767
Cc02_g24900	GSCOC_T00028826001	Homeobox-leucine zipper HAT4	-0.797668
Cc09_g03830	GSCOC_T00017498001	TIC 20- chloroplastic	-0.79725
Cc02_g30210	GSCOC_T00006393001	Uncharacterized protein	-0.796678
Cc03_g04630	GSCOC_T00026189001	Acylamino-acid-releasing enzyme	-0.796485
Cc11_g13600	GSCOC_T00032161001	Uncharacterized protein Mb2253c	-0.795605
Cc05_g07070	GSCOC_T00042228001	Pentatricopeptide repeat-containing At1g02150	-0.795228
Cc07_g04050	GSCOC_T00039655001	Pentatricopeptide repeat-containing At5g39350	-0.795209
Cc07_g11200	GSCOC_T00037028001	Methyltransferase 23	-0.79493
Cc03_g14390	GSCOC_T00026651001	FAM136A	-0.794789
Cc07_g14190	GSCOC_T00036646001	GPI ethanolamine phosphate transferase 2	-0.794407
Cc08_g14190	GSCOC_T00030256001	DEAD-box ATP-dependent RNA helicase 47A	-0.794261
Cc09_g02680	GSCOC_T00017644001	G-type lectin S-receptor-like serine threonine- kinase At1g11303	-0.794216
Cc10_g05230	GSCOC_T00034837001	Isoflavone 2 -hydroxylase	-0.794144
Cc08_g04260	GSCOC_T00034244001	Pentatricopeptide repeat-containing chloroplastic	-0.794029
Cc07_g13840	GSCOC_T00036688001	Methylmalonate-semialdehyde dehydrogenas	-0.79311
Cc11_g07410	GSCOC_T00018056001	Uncharacterized protein	-0.793014
Cc10_g06510	GSCOC_T00034643001	DETOXIFICATION 41	-0.792937
Cc01_g06700	GSCOC_T00030068001	Uncharacterized protein	-0.792879
Cc07_g14530	GSCOC_T00036605001	Uncharacterized protein	-0.792341
Cc01_g00200	GSCOC_T00012414001	isCO large subunit-binding subunit chloroplastic	-0.792337
Cc10_g15890	GSCOC_T00033791001	Argininosuccinate lyase	-0.791701
Cc07_g15250	GSCOC_T00036501001	Methionine aminotransferase	-0.791578
Cc06_g22840	GSCOC_T00040661001	Pentatricopeptide repeat-containing At2g27610	-0.791564
Cc01_g08110	GSCOC_T00015500001	late blight resistance homolog R1A-6	-0.791369
Cc08_g08490	GSCOC_T00009046001	DNA (cytosine-5)-methyltransferase CMT2	-0.790731
Cc03_g10730	GSCOC_T00041999001	3beta-hydroxysteroid-dehydrogenase decarboxylase isoform 2	-0.790445
Cc07_g06290	GSCOC_T00039928001	tRNA-dihydrouridine(16 17) synthas	-0.790415
Cc07_g00670	GSCOC_T00019145001	Uncharacterized protein	-0.790226
Cc07_g00810	GSCOC_T00019161001	Protection of telomeres 1b	-0.790194
Cc05_g07790	GSCOC_T00016782001	Zinc finger NUTCRACKER	-0.789978
Cc00_g13480	GSCOC_T00010148001	Uncharacterized protein	-0.789058
Cc05_g06710	GSCOC_T00042177001	Pentatricopeptide repeat-containing mitochondrial	-0.78904
Cc05_g03930	GSCOC_T00017311001	tRNA (guanine-N(7)-)-methyltransferase	-0.788798
Cc04_g09420	GSCOC_T00022830001	Transcription factor bHLH137	-0.78875
Cc10_g15830	GSCOC_T00033783001	Uncharacterized protein At5g64816	-0.787997
Cc02_g32620	GSCOC_T00001216001	Uncharacterized protein	-0.787393
Cc00_g32100	GSCOC_T00004429001	Acidic endochitinase	-0.787267
Cc00_g05570	GSCOC_T00009831001	Target of Myb 1	-0.787146
Cc02_g10430	GSCOC_T00029530001	SEC12 1	-0.787072
Cc04_g10630	GSCOC_T00042624001	DNA-(apurinic or apyrimidinic site) lyase	-0.786931
Cc08_g12770	GSCOC_T00030433001	14 kDa proline-rich	-0.78667
Cc11_g00050	GSCOC_T00010275001	Uncharacterized protein	-0.786631
Cc02_g26260	GSCOC_T00028631001	acyl-activating enzyme 19	-0.786003
Cc11_g15970	GSCOC_T00038125001	Uncharacterized protein	-0.785782
Cc03_g04610	GSCOC_T00026187001	Pentatricopeptide repeat-containing At3g23020	-0.785602
Cc03_g03490	GSCOC_T00026039001	Cyclin-T1-3	-0.785017
Cc09_g06660	GSCOC_T00005119001	chromosomal	-0.784854
Cc02_g22500	GSCOC_T00014921001	Uncharacterized protein	-0.784197
Cc07_g21060	GSCOC_T00027223001	late blight resistance homolog R1A-6	-0.78419
Cc08_g15040	GSCOC_T00035426001	E3 ubiquitin- ligase RHA1B	-0.783266
Cc02_g37980	GSCOC_T00027921001	Pentatricopeptide repeat-containing At4g30700	-0.783018
Cc08_g07670	GSCOC_T00025411001	Transcription-repair-coupling factor	-0.78284
Cc05_g11930	GSCOC_T00021253001	Uncharacterized protein	-0.78246
Cc06_g00610	GSCOC_T00023245001	Signal transducing adapter molecule 2	-0.782393
Cc07_g09650	GSCOC_T00037214001	U-box domain-containing 5	-0.781783
Cc09_g04270	GSCOC_T00017448001	Pentatricopeptide repeat-containing At4g01570	-0.78134
Cc03_g06960	GSCOC_T00026528001	Phospholipase A(1) chloroplastic	-0.781135
Cc00_g22770	GSCOC_T00007863001	Uncharacterized protein	-0.780986
Cc04_g15610	GSCOC_T00042334001	Uncharacterized protein	-0.780858
Cc10_g05170	GSCOC_T00034846001	Mortality factor 4 1	-0.780813
Cc08_g11260	GSCOC_T00027125001	Thioredoxin chloroplastic	-0.780305
Cc01_g05550	GSCOC_T00027360001	Pentatricopeptide repeat-containing At5g27110	-0.779545
Cc02_g38200	GSCOC_T00027894001	Cysteine chloroplastic chromoplastic	-0.779356
Cc07_g02290	GSCOC_T00039413001	Uncharacterized protein	-0.779237
Cc05_g00550	GSCOC_T00017093001	DEAD-box ATP-dependent RNA helicase mitochondrial	-0.779217
Cc10_g08730	GSCOC_T00034348001	Far upstream element-binding 3	-0.779214
Cc00_g20670	GSCOC_T00001284001	Uncharacterized protein	-0.778637
Cc07_g02870	GSCOC_T00039499001	Pentatricopeptide repeat-containing chloroplastic	-0.778471
Cc07_g07260	GSCOC_T00040067001	Uncharacterized protein	-0.77819
Cc01_g13550	GSCOC_T00028324001	Copper transporter 1	-0.777975
Cc04_g16190	GSCOC_T00042413001	Integrator complex subunit 3 homolog	-0.777857
Cc09_g10600	GSCOC_T00041025001	Uncharacterized protein ycf39	-0.777815
Cc07_g17370	GSCOC_T00037440001	Probable plastid-lipid-associated chloroplastic	-0.777437
Cc11_g14220	GSCOC_T00032087001	DEAD-box ATP-dependent RNA helicase 22	-0.777239
Cc07_g13410	GSCOC_T00036740001	Bifunctional	-0.777149
Cc05_g12200	GSCOC_T00021221001	CTL 1	-0.777086
Cc07_g00480	GSCOC_T00019120001	Uncharacterized protein	-0.777028
Cc09_g04760	GSCOC_T00017385001	Pentatricopeptide repeat-containing At5g66520	-0.776884
Cc10_g07620	GSCOC_T00034499001	Pre-mRNA-processing factor 40 homolog A	-0.776672
Cc08_g10820	GSCOC_T00027061001	Thromboxane-A synthase	-0.775795
Cc04_g12370	GSCOC_T00005293001	deoxyribonuclease TATDN1	-0.775495
Cc11_g03890	GSCOC_T00033998001	Uncharacterized protein	-0.775343
Cc00_g20950	GSCOC_T00006046001	phosphatase 1 regulatory subunit 7	-0.775266
Cc09_g09300	GSCOC_T00023067001	Mitochondrial carnitine acylcarnitine carrier	-0.77504
Cc01_g18260	GSCOC_T00016225001	SAP BP-73	-0.774756
Cc06_g10060	GSCOC_T00041834001	Elongation factor Ts	-0.774398
Cc06_g10790	GSCOC_T00041733001	Uncharacterized protein	-0.774357
Cc06_g00430	GSCOC_T00023219001	Uncharacterized protein	-0.774058
Cc02_g12370	GSCOC_T00029291001	Vacuolar 8	-0.773932
Cc08_g15100	GSCOC_T00035435001	Pentatricopeptide repeat-containing chloroplastic	-0.773756
Cc04_g05810	GSCOC_T00022348001	Pentatricopeptide repeat-containing At5g50990	-0.773401
Cc07_g16790	GSCOC_T00037518001	Uncharacterized protein	-0.772765
Cc07_g13330	GSCOC_T00036757001	Uncharacterized protein	-0.772528
Cc05_g01980	GSCOC_T00040826001	Uncharacterized protein	-0.772464
Cc04_g00930	GSCOC_T00021721001	Auxin-repressed kDa	-0.772277
Cc08_g07710	GSCOC_T00025418001	Uncharacterized protein	-0.771992
Cc11_g04700	GSCOC_T00042896001	Cleavage stimulation factor subunit 1	-0.771551
Cc07_g18920	GSCOC_T00018667001	Pentatricopeptide repeat-containing At1g62590	-0.771541
Cc03_g09400	GSCOC_T00042674001	Selenium-binding 1	-0.770798
Cc02_g34460	GSCOC_T00000694001	F-box PP2-B15	-0.770646
Cc09_g07700	GSCOC_T00036215001	Probable 18S rRNA (guanine-N(7))-methyltransferase	-0.770618
Cc00_g08960	GSCOC_T00010161001	Bifunctional dihydroflavonol 4-reductase flavanone 4-reductase	-0.770329
Cc11_g02470	GSCOC_T00018501001	late blight resistance homolog R1B-14	-0.770214
Cc05_g08760	GSCOC_T00016908001	Secologanin synthase	-0.770073
Cc05_g07500	GSCOC_T00042280001	Squamosa promoter-binding 4	-0.769795
Cc04_g04380	GSCOC_T00022162001	Palmitoyl-monogalactosyldiacylglycerol delta-7 chloroplastic	-0.769566
Cc08_g15160	GSCOC_T00035442001	Mitogen-activated kinase 4	-0.769372
Cc11_g06670	GSCOC_T00020691001	Heat stress transcription factor A-8	-0.769142
[truncated: 3,567 more rows]
