# Supplementary material for: Transcriptomic Leaf Profiling Reveals Differential Responses of the Two Most Traded Coffee Species to Elevated [CO2]
Source: Int J Mol Sci. 2020 Dec 3;21(23):9211. doi: 10.3390/ijms21239211 (PMC7730880; doi:10.3390/ijms21239211)
Supplement: Supplementary file 1 [file ijms-21-09211-s001.zip › Table S5.xlsx]

## Sheet: up-regulated
Gene ID	ORF Name	Protein Name	Fold Change
Cc11_g10870	GSCOC_T00032519001	Uncharacterized protein	14.2361
Cc00_g10190	GSCOC_T00005691001	Acyl- -binding domain-containing 4	12.5163
Cc10_g14870	GSCOC_T00033641001	Uncharacterized protein	12.0342
Cc00_g08140	GSCOC_T00005621001	Homeobox-leucine zipper protein	11.8924
Cc05_g00740	GSCOC_T00013163001	Acidic endochitinase	11.8761
Cc00_g25490	GSCOC_T00000226001	8-hydroxyquercetin 8-O-methyltransferase	11.5751
Cc03_g11280	GSCOC_T00007327001	Cell division control 48 homolog B	11.2922
Cc07_g01500	GSCOC_T00039321001	Uncharacterized protein	11.0529
Cc01_g01970	GSCOC_T00019277001	F-box LRR-repeat At4g14096	11.0004
Cc00_g17790	GSCOC_T00004701001	Uncharacterized protein	10.9246
Cc00_g26610	GSCOC_T00013347001	Uncharacterized protein	10.8781
Cc10_g14880	GSCOC_T00033642001	Uncharacterized protein	10.8264
Cc09_g08250	GSCOC_T00020771001	Uncharacterized protein	10.7113
Cc03_g09260	GSCOC_T00042692001	Uncharacterized protein	10.5956
Cc00_g21940	GSCOC_T00009595001	UTP--glucose-1-phosphate uridylyltransferase	10.5429
Cc01_g01360	GSCOC_T00037923001	Uncharacterized protein	10.541
Cc06_g16070	GSCOC_T00030741001	Uncharacterized protein	10.3638
Cc11_g00660	GSCOC_T00004227001	Uncharacterized protein	10.2412
Cc09_g08930	GSCOC_T00023138001	Uncharacterized protein	10.2257
Cc00_g07170	GSCOC_T00011728001	UDP-glucose flavonoid 3-O-glucosyltransferase 3	10.0092
Cc09_g07810	GSCOC_T00003762001	Uncharacterized protein	9.99556
Cc00_g01640	GSCOC_T00002753001	Uncharacterized protein	9.9807
Cc00_g10180	GSCOC_T00005690001	Acyl- -binding domain-containing 4	9.85486
Cc00_g20500	GSCOC_T00006309001	Uncharacterized protein	9.72968
Cc01_g04210	GSCOC_T00039295001	Homeobox-leucine zipper ATHB-8	9.69954
Cc03_g12740	GSCOC_T00015161001	Uncharacterized protein	9.67908
Cc06_g16100	GSCOC_T00030737001	Uncharacterized protein	9.51992
Cc10_g15150	GSCOC_T00033683001	Peroxidase 12	9.44931
Cc00_g11100	GSCOC_T00009123001	Uncharacterized protein	9.17374
Cc08_g04890	GSCOC_T00042481001	Probable nucleoredoxin 1-2	9.15807
Cc04_g16250	GSCOC_T00042423001	Uncharacterized protein	9.13645
Cc11_g08120	GSCOC_T00032919001	PLANT CADMIUM RESISTANCE 2	9.10388
Cc05_g00760	GSCOC_T00013166001	Acidic endochitinase	8.99771
Cc11_g01630	GSCOC_T00019539001	1-aminocyclopropane-1-carboxylate oxidase homolog 1	8.97024
Cc04_g14960	GSCOC_T00010520001	Uncharacterized protein	8.92256
Cc04_g14930	GSCOC_T00010515001	Uncharacterized protein	8.89221
Cc09_g01770	GSCOC_T00017766001	DETOXIFICATION 41	8.87074
Cc00_g15690	GSCOC_T00011280001	Mannosyl-oligosaccharide	8.83463
Cc06_g16080	GSCOC_T00030740001	Uncharacterized protein	8.80894
Cc00_g35880	GSCOC_T00010032001	disease resistance RGA1	8.63671
Cc00_g05280	GSCOC_T00010369001	Uncharacterized protein	8.6009
Cc10_g16450	GSCOC_T00013407001	Uncharacterized protein	8.58911
Cc10_g16310	GSCOC_T00033850001	Uncharacterized protein	8.56566
Cc03_g14000	GSCOC_T00031781001	Uncharacterized protein	8.52267
Cc07_g16850	GSCOC_T00037509001	Acetylglutamate kinase	8.48933
Cc00_g26620	GSCOC_T00013349001	Uncharacterized protein	8.39288
Cc02_g30410	GSCOC_T00023754001	DNA repair RAD5B	8.34352
Cc11_g04380	GSCOC_T00004777001	Uncharacterized protein	8.23515
Cc05_g02270	GSCOC_T00018431001	Uncharacterized protein	8.23086
Cc08_g15140	GSCOC_T00035439001	F-box At5g55150	8.13029
Cc04_g15230	GSCOC_T00042290001	ABC transporter A family member 9	8.11174
Cc06_g18640	GSCOC_T00040488001	methyltransferase DDB_G0268948	8.063
Cc03_g14340	GSCOC_T00031833001	Uncharacterized protein	8.0451
Cc00_g35510	GSCOC_T00003701001	Lysine--tRNA ligase	8.04135
Cc00_g08000	GSCOC_T00009236001	Serine threonine- kinase PBS1	8.03607
Cc00_g09180	GSCOC_T00012170001	Uncharacterized protein	7.99609
Cc09_g02230	GSCOC_T00017703001	Uncharacterized protein	7.93511
Cc11_g00840	GSCOC_T00019689001	Probable LRR receptor-like serine threonine- kinase At3g47570	7.85789
Cc00_g15330	GSCOC_T00009841001	Disease resistance ADR1	7.83551
Cc00_g12970	GSCOC_T00005419001	8-hydroxyquercetin 8-O-methyltransferase	7.7466
Cc00_g20770	GSCOC_T00008849001	Caffeic acid 3-O-methyltransferase	7.7054
Cc02_g37670	GSCOC_T00027958001	T-complex 1 subunit theta	7.70377
Cc03_g11350	GSCOC_T00000035001	Purine permease 3	7.64739
Cc01_g04370	GSCOC_T00004460001	Adenosine kinase 2	7.57746
Cc00_g23130	GSCOC_T00012628001	Probable LRR receptor-like serine threonine- kinase At3g47570	7.49876
Cc09_g06810	GSCOC_T00005139001	Fe(2+) transport 1	7.49418
Cc08_g10520	GSCOC_T00027020001	Signal recognition particle 54 kDa 2	7.41198
Cc00_g25680	GSCOC_T00001556001	8-hydroxyquercetin 8-O-methyltransferase	7.40961
Cc03_g13830	GSCOC_T00031739001	Minor histocompatibility antigen H13	7.3765
Cc04_g04990	GSCOC_T00022239001	Probable aquaporin NIP5-1	7.37409
Cc01_g09490	GSCOC_T00024003001	Probable fatty acyl- reductase 4	7.28475
Cc00_g12410	GSCOC_T00010382001	Uncharacterized protein	7.27366
Cc06_g17300	GSCOC_T00036366001	Uncharacterized protein	7.22359
Cc10_g11410	GSCOC_T00013659001	T-complex 1 subunit beta	7.21275
Cc06_g16090	GSCOC_T00030739001	Uncharacterized protein	7.17101
Cc03_g11690	GSCOC_T00043188001	disease resistance RGA3	7.15498
Cc02_g28190	GSCOC_T00025186001	Transcription factor bHLH120	7.15425
Cc10_g09360	GSCOC_T00031555001	12-oxophytodienoate reductase 2	7.14793
Cc00_g23220	GSCOC_T00011145001	TMV resistance N	7.1408
Cc07_g16840	GSCOC_T00037510001	Acetylglutamate kinase	7.11466
Cc08_g07740	GSCOC_T00011862001	Uncharacterized protein	7.11426
Cc07_g16950	GSCOC_T00037494001	Citrate-binding	7.06502
Cc03_g04540	GSCOC_T00026176001	3-ketoacyl- synthase 2	7.0412
Cc00_g11110	GSCOC_T00009124001	Uncharacterized protein	7.03743
Cc11_g06190	GSCOC_T00020620001	late blight resistance homolog R1B-17	7.02806
Cc04_g10210	GSCOC_T00042563001	Abscisic-aldehyde oxidase	6.99295
Cc01_g02990	GSCOC_T00019058001	UDP-glucose flavonoid 3-O-glucosyltransferase 6	6.96464
Cc05_g09860	GSCOC_T00021530001	Subtilisin-like protease	6.93706
Cc11_g02520	GSCOC_T00018511001	late blight resistance homolog R1B-17	6.87107
Cc02_g10860	GSCOC_T00029482001	DNA replication licensing factor MCM7	6.82623
Cc00_g29630	GSCOC_T00001110001	Uncharacterized protein	6.82439
Cc02_g29830	GSCOC_T00038889001	Uncharacterized protein	6.8181
Cc08_g08830	GSCOC_T00017215001	BURP domain-containing 3	6.78931
Cc00_g13340	GSCOC_T00003691001	Actin-101	6.78824
Cc00_g32860	GSCOC_T00013701001	disease resistance RGA4	6.78638
Cc08_g09050	GSCOC_T00017244001	B3 domain-containing Os01g0234100	6.74715
Cc08_g07880	GSCOC_T00011887001	Uncharacterized protein	6.74361
Cc00_g22550	GSCOC_T00011312001	Cyclin-dependent kinase C-1	6.70194
Cc00_g28380	GSCOC_T00007303001	Iron-sulfur assembly -like mitochondrial	6.66447
Cc02_g38250	GSCOC_T00027887001	DETOXIFICATION 41	6.64802
Cc00_g22620	GSCOC_T00008168001	ABC transporter A family member 2	6.64492
Cc03_g11820	GSCOC_T00043211001	disease resistance RGA4	6.64286
Cc00_g26140	GSCOC_T00002207001	Ubiquitin-NEDD8 RUB2	6.63862
Cc09_g02240	GSCOC_T00017702001	Uncharacterized protein	6.6048
Cc03_g11460	GSCOC_T00019349001	Uncharacterized protein	6.59955
Cc01_g09180	GSCOC_T00023964001	Flavonol 7-O-beta-glucosyltransferase UGT74F1	6.59654
Cc08_g11980	GSCOC_T00030546001	Palmitoyl- thioesterase 1	6.58699
Cc10_g08840	GSCOC_T00034332001	Metallothionein 1	6.56053
Cc03_g12770	GSCOC_T00015157001	Uncharacterized protein	6.55241
Cc00_g15440	GSCOC_T00001450001	MDIS1-interacting receptor like kinase 2	6.52647
Cc08_g11080	GSCOC_T00027100001	Uncharacterized protein	6.50315
Cc00_g00310	GSCOC_T00036111001	Probable phosphatase 2C 43	6.49342
Cc00_g22970	GSCOC_T00000544001	SENSITIVITY TO RED LIGHT REDUCED 1	6.49231
Cc08_g04110	GSCOC_T00034217001	disease resistance RGA1	6.48062
Cc07_g18420	GSCOC_T00018755001	Pleiotropic drug resistance 2	6.47991
Cc07_g16830	GSCOC_T00037511001	Uncharacterized protein	6.44713
Cc00_g21180	GSCOC_T00005981001	Transmembrane emp24 domain-containing 2	6.44095
Cc08_g04970	GSCOC_T00042467001	Cytosolic sulfotransferase 5	6.43276
Cc03_g11660	GSCOC_T00043184001	Histone-lysine N-methyltransferase CLF	6.43157
Cc00_g05810	GSCOC_T00012073001	Caffeic acid 3-O-methyltransferase	6.42929
Cc04_g15350	GSCOC_T00042304001	ABC transporter A family member 11	6.41749
Cc05_g15370	GSCOC_T00038700001	Uncharacterized protein	6.38278
Cc00_g31790	GSCOC_T00011706001	Probable leucine-rich repeat receptor kinase At1g35710	6.37296
Cc08_g07970	GSCOC_T00007309001	Uncharacterized protein	6.36367
Cc01_g17970	GSCOC_T00016259001	NRT1 PTR FAMILY	6.32322
Cc00_g21720	GSCOC_T00005428001	disease resistance RGA4	6.31926
Cc01_g00170	GSCOC_T00012417001	Cytochrome P450 716B2	6.31155
Cc04_g10600	GSCOC_T00042618001	Cytochrome P450 82A3	6.28192
Cc03_g12410	GSCOC_T00015223001	Chitinase 2	6.2637
Cc00_g27450	GSCOC_T00000948001	MDIS1-interacting receptor like kinase 2	6.25061
Cc04_g10040	GSCOC_T00042538001	Cytochrome P450 94A1	6.24925
Cc08_g11120	GSCOC_T00027105001	Ankyrin-2	6.24534
Cc10_g13890	GSCOC_T00035224001	Probable LRR receptor-like serine threonine- kinase At2g16250	6.2402
Cc00_g17070	GSCOC_T00002152001	Uncharacterized protein	6.23225
Cc11_g04370	GSCOC_T00004776001	Transcription factor E2FA	6.18244
Cc04_g15290	GSCOC_T00042298001	ABC transporter A family member 11	6.16351
Cc00_g11300	GSCOC_T00007149001	Bark storage A	6.16299
Cc07_g14460	GSCOC_T00036612001	Proline--tRNA ligase	6.15748
Cc03_g12800	GSCOC_T00015151001	disease resistance RGA4	6.13663
Cc00_g33600	GSCOC_T00001617001	Disease resistance RPM1	6.13142
Cc11_g06640	GSCOC_T00020687001	L-gulonolactone oxidase	6.11984
Cc11_g07520	GSCOC_T00018045001	Ankyrin repeat-containing At5g02620	6.11687
Cc05_g02390	GSCOC_T00020988001	Iron-sulfur assembly -like mitochondrial	6.11678
Cc07_g13640	GSCOC_T00036712001	Rhamnogalacturonate lyase	6.10677
Cc00_g27800	GSCOC_T00010800001	Elongation factor 1-alpha	6.10533
Cc00_g32100	GSCOC_T00004429001	Acidic endochitinase	6.09194
Cc03_g09710	GSCOC_T00030958001	Auxin-induced PCNT115	6.05615
Cc02_g31580	GSCOC_T00027533001	Polyubiquitin (Fragment)	6.03414
Cc03_g04980	GSCOC_T00026230001	ase inhibitor	5.96662
Cc02_g30420	GSCOC_T00023757001	Beta-glucosidase 11	5.95879
Cc05_g09610	GSCOC_T00021561001	Villin-2	5.95511
Cc00_g34820	GSCOC_T00012937001	ADP-ribosylation factor 2	5.95184
Cc01_g05660	GSCOC_T00027377001	disease resistance RGA1	5.94024
Cc06_g19110	GSCOC_T00028962001	Transcription factor ORG2	5.9345
Cc03_g12080	GSCOC_T00015300001	E3 ubiquitin- ligase RING1a	5.91901
Cc10_g15130	GSCOC_T00033681001	Peroxidase 12	5.89718
Cc01_g17070	GSCOC_T00016366001	Uncharacterized protein	5.88141
Cc06_g22520	GSCOC_T00012880001	Uncharacterized protein	5.85485
Cc00_g21810	GSCOC_T00009098001	Pentatricopeptide repeat-containing chloroplastic	5.83871
Cc00_g25320	GSCOC_T00006374001	Probable nucleoredoxin 1-1	5.83844
Cc06_g14230	GSCOC_T00041284001	Uncharacterized protein	5.82009
Cc11_g04550	GSCOC_T00004809001	Dof zinc finger	5.79818
Cc07_g21170	GSCOC_T00027210001	Dolichol-phosphate mannosyltransferase subunit 1	5.79629
Cc09_g07380	GSCOC_T00036269001	Reticuline oxidase	5.79452
Cc01_g04380	GSCOC_T00004461001	Mannose glucose-specific lectin (Fragment)	5.79104
Cc00_g27220	GSCOC_T00001161001	Disease resistance RPM1	5.7873
Cc00_g35240	GSCOC_T00006553001	disease resistance RGA4	5.78155
Cc00_g19130	GSCOC_T00000895001	Uncharacterized protein	5.7443
Cc00_g27740	GSCOC_T00005997001	60S ribosomal L4-2	5.70228
Cc05_g16420	GSCOC_T00038563001	Uncharacterized protein	5.69644
Cc03_g04970	GSCOC_T00026229001	Inhibitor of trypsin and hageman factor	5.67769
Cc04_g11660	GSCOC_T00037368001	Aldehyde dehydrogenase family 2 member C4	5.67015
Cc05_g07600	GSCOC_T00016754001	Tyrosine aminotransferase	5.6701
Cc00_g01730	GSCOC_T00002831001	Uncharacterized mitochondrial g00910	5.66882
Cc08_g05770	GSCOC_T00024366001	Uncharacterized protein	5.59954
Cc08_g03610	GSCOC_T00034146001	Disease resistance RPM1	5.5922
Cc00_g22090	GSCOC_T00011254001	Probable disease resistance At1g61310	5.5196
Cc11_g04420	GSCOC_T00004786001	Uncharacterized protein	5.51833
Cc11_g11650	GSCOC_T00032418001	Cytochrome P450 734A1	5.51426
Cc03_g12820	GSCOC_T00015146001	disease resistance RGA3	5.50212
Cc08_g06200	GSCOC_T00040971001	Histidine kinase 5	5.46223
Cc11_g01780	GSCOC_T00019517001	LTO1 homolog	5.45097
Cc00_g26800	GSCOC_T00009925001	Disease resistance RPM1	5.42291
Cc03_g12710	GSCOC_T00015167001	disease resistance RPP13 1	5.40575
Cc00_g25750	GSCOC_T00013351001	Disease resistance RGA2	5.35997
Cc03_g06790	GSCOC_T00026499001	7-hydroxymethyl chlorophyll a chloroplastic	5.3496
Cc07_g21220	GSCOC_T00027202001	Serine threonine- kinase BSK8	5.34452
Cc01_g00900	GSCOC_T00038014001	Uncharacterized protein	5.32823
Cc10_g14260	GSCOC_T00012016001	Pathogen-related	5.30869
Cc08_g08370	GSCOC_T00007228001	Caffeic acid 3-O-methyltransferase	5.30388
Cc00_g04100	GSCOC_T00013737001	NADH dehydrogenas	5.27348
Cc00_g05380	GSCOC_T00000535001	Uncharacterized protein	5.26654
Cc10_g09580	GSCOC_T00031525001	Cysteine ase inhibitor 5	5.25884
Cc10_g06230	GSCOC_T00034687001	Laccase-14	5.25173
Cc07_g13090	GSCOC_T00036795001	Uncharacterized protein	5.24952
Cc09_g07780	GSCOC_T00003759001	Probable LRR receptor-like serine threonine- kinase At3g47570	5.24794
Cc04_g06550	GSCOC_T00022445001	Spore coat A	5.19927
Cc09_g03020	GSCOC_T00017599001	Ammonium transporter 1 member 2	5.18891
Cc03_g10380	GSCOC_T00031054001	Probable mitochondrial chaperone bcs1	5.17117
Cc11_g04080	GSCOC_T00034037001	late blight resistance homolog R1A-6	5.15944
Cc00_g13940	GSCOC_T00006567001	Uncharacterized protein	5.15616
Cc10_g11400	GSCOC_T00013658001	T-complex 1 subunit beta	5.14257
Cc03_g09000	GSCOC_T00042731001	Glycine-rich	5.12344
Cc01_g18690	GSCOC_T00016169001	Uncharacterized protein	5.08707
Cc00_g32010	GSCOC_T00012890001	Thioredoxin H2	5.0561
Cc10_g14330	GSCOC_T00012024001	Uncharacterized protein	5.05351
Cc09_g03770	GSCOC_T00017505001	Serine carboxypeptidase-like 20	5.05295
Cc02_g29550	GSCOC_T00018392001	3-hydroxypropionyl-coenzyme A dehydratase	5.03855
Cc10_g04970	GSCOC_T00034868001	Zeta-crystallin	5.03555
Cc01_g00090	GSCOC_T00012429001	Uncharacterized protein	5.00761
Cc06_g09000	GSCOC_T00041976001	Uncharacterized protein	4.96289
Cc10_g16300	GSCOC_T00033849001	Uncharacterized protein	4.95927
Cc00_g12230	GSCOC_T00011262001	Phospholipase C 2	4.94434
Cc02_g22570	GSCOC_T00014932001	Glutelin type-A 2	4.93694
Cc02_g25300	GSCOC_T00028766001	Uncharacterized protein	4.93685
Cc00_g13190	GSCOC_T00012574001	Probable LRR receptor-like serine threonine- kinase At3g47570	4.93585
Cc01_g03090	GSCOC_T00019035001	Uncharacterized protein	4.87878
Cc02_g37530	GSCOC_T00027977001	(+)-neomenthol dehydrogenase	4.85177
Cc10_g14300	GSCOC_T00012021001	Uncharacterized protein	4.84184
Cc11_g00670	GSCOC_T00004228001	Acyl- -binding domain-containing 4	4.83509
Cc00_g20220	GSCOC_T00005237001	disease resistance RGA3	4.82556
Cc08_g04240	GSCOC_T00034240001	Disease resistance RGA2	4.81934
Cc07_g01140	GSCOC_T00019202001	CASP 1F3	4.81519
Cc02_g38390	GSCOC_T00027870001	Ferric reduction oxidase 2	4.78744
Cc06_g16160	GSCOC_T00030728001	Probable disease resistance RPP8 2	4.78662
Cc00_g10560	GSCOC_T00001817001	oxidoreductase GLYR1	4.76783
Cc03_g09010	GSCOC_T00042727001	CYC02	4.76539
Cc02_g28680	GSCOC_T00009461001	LEAF RUST 10 DISEASE-RESISTANCE LOCUS RECEPTOR-LIKE PROTEIN KINASE-like	4.74471
Cc02_g07550	GSCOC_T00029922001	Glycerol-3-phosphate acyltransferase 5	4.7434
Cc00_g31700	GSCOC_T00002038001	Uncharacterized protein	4.73805
Cc05_g07510	GSCOC_T00042281001	E3 ubiquitin- ligase RING1a	4.73636
Cc11_g07480	GSCOC_T00018049001	Receptor 12	4.71392
Cc06_g00160	GSCOC_T00023184001	Bromodomain and PHD finger-containing 3	4.70295
Cc09_g02140	GSCOC_T00017713001	Uncharacterized protein	4.69799
Cc04_g07480	GSCOC_T00022567001	receptor kinase 1	4.68803
Cc00_g30070	GSCOC_T00012164001	Acetylglutamate kinase	4.68701
Cc08_g12550	GSCOC_T00030466001	Small heat shock chloroplastic	4.67367
Cc00_g34270	GSCOC_T00000106001	disease resistance RGA4	4.66982
Cc02_g23670	GSCOC_T00015069001	Uncharacterized protein	4.63264
Cc02_g12800	GSCOC_T00029235001	(	4.62079
Cc00_g09400	GSCOC_T00008942001	UTP--glucose-1-phosphate uridylyltransferase	4.61805
Cc11_g11640	GSCOC_T00032419001	Cytochrome P450 734A1	4.61791
Cc08_g04160	GSCOC_T00034227001	disease resistance RGA3	4.58088
Cc04_g15330	GSCOC_T00042302001	ABC transporter A family member 11	4.51796
Cc09_g03760	GSCOC_T00017506001	Serine carboxypeptidase-like 20	4.5077
Cc02_g00470	GSCOC_T00019829001	60S ribosomal L13-2	4.49458
Cc07_g11100	GSCOC_T00037039001	Heavy metal-associated isoprenylated plant 26	4.49187
Cc11_g07530	GSCOC_T00018044001	LRR receptor-like serine threonine- kinase GSO1	4.47349
Cc00_g23060	GSCOC_T00008621001	Uncharacterized protein	4.45924
Cc10_g10280	GSCOC_T00031433001	Uncharacterized protein At4g06598	4.45816
Cc11_g07490	GSCOC_T00018048001	Leucine-rich repeat receptor kinase EMS1	4.4576
Cc08_g06820	GSCOC_T00025224001	TMV resistance N	4.45065
Cc00_g19820	GSCOC_T00009625001	60S ribosomal L13a-2	4.45052
Cc00_g33920	GSCOC_T00002700001	Solute carrier family 40 member 2	4.44731
Cc02_g21480	GSCOC_T00014790001	Uncharacterized protein	4.43761
Cc00_g12700	GSCOC_T00012642001	Uncharacterized protein	4.42577
Cc00_g18490	GSCOC_T00005333001	Codeine O-demethylase	4.40202
Cc03_g08160	GSCOC_T00033209001	UPF0481 At3g47200	4.3934
Cc11_g15500	GSCOC_T00038064001	Heme-binding 2	4.37289
Cc05_g13260	GSCOC_T00021087001	ABC transporter B family member 18	4.37131
Cc03_g12670	GSCOC_T00015179001	disease resistance RGA4	4.36624
Cc00_g18700	GSCOC_T00010033001	Disease resistance RGA2	4.35902
Cc10_g15140	GSCOC_T00033682001	Peroxidase 12	4.35151
Cc00_g18270	GSCOC_T00012290001	Receptor 12	4.34786
Cc08_g04790	GSCOC_T00042495001	Probable nucleoredoxin 1	4.3439
Cc02_g15880	GSCOC_T00014054001	Cysteine ase inhibitor 6	4.34013
Cc00_g11330	GSCOC_T00007152001	Bark storage A	4.31807
Cc01_g01800	GSCOC_T00037845001	disease resistance RGA4	4.30496
Cc09_g06850	GSCOC_T00005145001	LRR receptor-like serine threonine- kinase FLS2	4.30328
Cc08_g10810	GSCOC_T00027060001	Heat shock factor HSF30	4.28939
Cc03_g07130	GSCOC_T00026550001	ROOT HAIR DEFECTIVE 3	4.26377
Cc08_g11110	GSCOC_T00027104001	Caskin-2	4.25829
Cc00_g22600	GSCOC_T00003322001	Codeine O-demethylase	4.25454
Cc07_g20620	GSCOC_T00007211001	Probable disease resistance At5g63020	4.23645
Cc05_g09250	GSCOC_T00002655001	Floral homeotic AGAMOUS	4.21972
Cc08_g16390	GSCOC_T00035598001	Uncharacterized protein	4.2169
Cc00_g12780	GSCOC_T00009621001	Uncharacterized protein	4.20009
Cc00_g27820	GSCOC_T00006800001	Vinorine synthase	4.19656
Cc10_g13320	GSCOC_T00035313001	late blight resistance homolog R1B-17	4.18566
Cc06_g06090	GSCOC_T00043180001	Beta- insoluble isoenzyme 1	4.17722
Cc02_g22660	GSCOC_T00014943001	Probable receptor kinase At1g11050	4.16483
Cc00_g30730	GSCOC_T00009215001	Uncharacterized protein	4.16334
Cc01_g03490	GSCOC_T00033099001	MDIS1-interacting receptor like kinase 2	4.16237
Cc10_g10480	GSCOC_T00035976001	Uncharacterized protein	4.15345
Cc04_g12010	GSCOC_T00037418001	Uncharacterized protein	4.12712
Cc00_g11710	GSCOC_T00007637001	late blight resistance homolog R1B-17	4.12213
Cc09_g02070	GSCOC_T00017724001	Tyrosine-specific transport	4.11763
Cc00_g01650	GSCOC_T00002754001	Ribosomal mitochondrial	4.10977
Cc00_g27480	GSCOC_T00006543001	Probable receptor kinase At5g39020	4.10912
Cc05_g06940	GSCOC_T00042212001	Bifunctional epoxide hydrolase 2	4.10747
Cc03_g02960	GSCOC_T00025969001	Elongation factor Tu	4.09257
Cc08_g01650	GSCOC_T00038353001	Disease resistance RPM1	4.08797
Cc07_g13750	GSCOC_T00036700001	Probable mannitol dehydrogenase	4.08192
Cc00_g16440	GSCOC_T00005629001	Uncharacterized protein	4.07559
Cc08_g06440	GSCOC_T00036031001	UDP-glycosyltransferase 74F2	4.04605
Cc03_g11730	GSCOC_T00043195001	disease resistance RGA3	4.02953
Cc00_g22410	GSCOC_T00008114001	Disease resistance RPM1	4.00974
Cc02_g25290	GSCOC_T00028767001	Uncharacterized protein	4.00448
Cc02_g08730	GSCOC_T00029756001	Uncharacterized protein	3.9975
Cc00_g09390	GSCOC_T00008941001	Serine threonine- kinase PBS1	3.99263
Cc05_g01750	GSCOC_T00015751001	Cytochrome P450 82G1	3.97944
Cc03_g09920	GSCOC_T00030983001	Probable aldo-keto reductase 2	3.97888
Cc00_g19200	GSCOC_T00012531001	TMV resistance N	3.96528
Cc08_g04190	GSCOC_T00034231001	Topless-related 2	3.96434
Cc00_g00530	GSCOC_T00036141001	Probable receptor kinase At5g39030	3.96373
Cc00_g00640	GSCOC_T00036159001	LEAF RUST 10 DISEASE-RESISTANCE LOCUS RECEPTOR-LIKE PROTEIN KINASE-like	3.96264
Cc00_g23950	GSCOC_T00011724001	disease resistance RGA4	3.95836
Cc03_g12830	GSCOC_T00015145001	disease resistance RGA3	3.95011
Cc00_g28850	GSCOC_T00005982001	Caffeic acid 3-O-methyltransferase 1	3.94537
Cc00_g11660	GSCOC_T00004163001	Pathogenesis-related P2	3.9431
Cc10_g10450	GSCOC_T00035969001	Probable LRR receptor-like serine threonine- kinase At3g47570	3.93395
Cc02_g16090	GSCOC_T00014084001	Monothiol glutaredoxin-S2	3.90141
Cc08_g10740	GSCOC_T00027051001	Beta- insoluble isoenzyme CWINV1	3.89514
Cc02_g31770	GSCOC_T00027495001	ADP-ribosylation factor	3.89234
Cc07_g20330	GSCOC_T00017006001	UDP-glycosyltransferase 85A2	3.87962
Cc11_g07160	GSCOC_T00018092001	Defensin	3.87462
Cc06_g18440	GSCOC_T00040460001	Non-specific lipid-transfer	3.87379
Cc03_g12790	GSCOC_T00015155001	disease resistance RGA4	3.87347
Cc00_g24870	GSCOC_T00011617001	disease resistance RGA4	3.86828
Cc03_g10600	GSCOC_T00004052001	MDIS1-interacting receptor like kinase 2	3.86356
Cc00_g27770	GSCOC_T00012253001	Probable leucine-rich repeat receptor kinase At1g35710	3.85851
Cc08_g03690	GSCOC_T00034155001	Disease resistance RPM1	3.84553
Cc07_g13920	GSCOC_T00036677001	UDP-rhamnose:rhamnosyltransferase 1	3.83582
Cc01_g01750	GSCOC_T00037853001	Disease resistance RGA2	3.83182
Cc00_g19750	GSCOC_T00011285001	disease resistance RGA4	3.82852
Cc01_g11500	GSCOC_T00003313001	Uncharacterized protein	3.82029
Cc00_g26900	GSCOC_T00007718001	MDIS1-interacting receptor like kinase 2	3.808
Cc00_g18260	GSCOC_T00012288001	LRR receptor-like serine threonine- kinase ERL2	3.80557
Cc10_g05830	GSCOC_T00034757001	Probable beta-D-xylosidase 5	3.79825
Cc00_g19740	GSCOC_T00011283001	Histone-lysine N-methyltransferase CLF	3.7878
Cc05_g00770	GSCOC_T00013168001	Acidic endochitinase	3.78078
Cc00_g06320	GSCOC_T00008055001	CCAAT enhancer-binding zeta	3.77355
Cc02_g20240	GSCOC_T00014630001	Agamous-like MADS-box AGL62	3.76925
Cc01_g09660	GSCOC_T00024029001	Uncharacterized protein	3.76591
Cc02_g14910	GSCOC_T00013917001	Endoribonuclease Dicer homolog 2	3.76128
Cc09_g01470	GSCOC_T00017805001	Probable F-box At4g22030	3.75701
Cc01_g02370	GSCOC_T00009717001	Uncharacterized protein	3.7552
Cc00_g11980	GSCOC_T00010413001	MDIS1-interacting receptor like kinase 2	3.74867
Cc05_g01920	GSCOC_T00015782001	UDP-glucose flavonoid 3-O-glucosyltransferase 6	3.73869
Cc03_g15860	GSCOC_T00001642001	disease resistance RGA3	3.7373
Cc03_g02650	GSCOC_T00025922001	Uncharacterized protein	3.73715
Cc00_g34220	GSCOC_T00009908001	disease resistance RGA4	3.73108
Cc05_g08840	GSCOC_T00016916001	Secologanin synthase	3.73
Cc00_g30320	GSCOC_T00001961001	disease resistance RGA4	3.72874
Cc00_g21140	GSCOC_T00000021001	germin 3-2	3.72398
Cc00_g05420	GSCOC_T00000299001	late blight resistance homolog R1A-6	3.71413
Cc00_g26930	GSCOC_T00005551001	Disease resistance RGA2	3.7049
Cc05_g00960	GSCOC_T00009655001	disease resistance RGA3	3.70055
Cc00_g31350	GSCOC_T00006492001	disease resistance RGA4	3.68317
Cc07_g13770	GSCOC_T00036698001	Uncharacterized protein	3.67463
Cc04_g03920	GSCOC_T00022107001	Dehydrogenase reductase SDR family member 4	3.66193
Cc02_g03820	GSCOC_T00020280001	Uncharacterized protein	3.65948
Cc10_g03630	GSCOC_T00024894001	Cytochrome P450 82A3	3.65283
Cc00_g34120	GSCOC_T00007686001	disease resistance RGA4	3.65061
Cc04_g05250	GSCOC_T00022272001	Heat shock 70 kDa	3.63317
Cc08_g15870	GSCOC_T00035531001	Hydroquinone glucosyltransferase	3.62962
Cc10_g13910	GSCOC_T00035222001	Probable serine threonine- kinase CST	3.61389
Cc08_g04830	GSCOC_T00042491001	Probable disease resistance At5g45510	3.61244
Cc04_g14520	GSCOC_T00040694001	L-type lectin-domain containing receptor kinase	3.60427
Cc01_g05240	GSCOC_T00011454001	Disease resistance RGA2	3.60246
Cc00_g22850	GSCOC_T00013107001	T-complex 1 subunit theta	3.60112
Cc08_g06450	GSCOC_T00036032001	UDP-glycosyltransferase 74E2	3.59755
Cc01_g09870	GSCOC_T00024057001	Hyoscyamine 6-dioxygenase	3.59064
Cc02_g22890	GSCOC_T00014967001	COBRA 1	3.57514
Cc02_g00510	GSCOC_T00019834001	Uncharacterized protein	3.5717
Cc03_g10110	GSCOC_T00031013001	Splicing factor U2af small subunit A	3.56352
Cc01_g05590	GSCOC_T00027367001	Uncharacterized protein	3.55936
Cc00_g35180	GSCOC_T00009929001	Mannosyl-oligosaccharide	3.55705
Cc07_g18840	GSCOC_T00018686001	Gibberellin 20 oxidase 2	3.55573
Cc00_g29570	GSCOC_T00008662001	Glutamate dehydrogenase	3.54421
Cc00_g25870	GSCOC_T00011906001	Uncharacterized protein	3.54337
Cc02_g21310	GSCOC_T00014768001	UDP-glycosyltransferase 85A3	3.52113
Cc00_g09520	GSCOC_T00004381001	Uncharacterized protein	3.51717
Cc10_g06500	GSCOC_T00034647001	Purine permease 3	3.5132
Cc00_g24280	GSCOC_T00011104001	Uncharacterized protein	3.50552
Cc07_g20740	GSCOC_T00027308001	late blight resistance homolog R1B-16	3.49844
Cc06_g20220	GSCOC_T00022935001	NRT1 PTR FAMILY	3.4935
Cc00_g14190	GSCOC_T00009213001	Probable UDP-arabinopyranose mutase 2	3.48211
Cc00_g31010	GSCOC_T00002438001	Disease resistance RPM1	3.48174
Cc01_g03690	GSCOC_T00033064001	Uncharacterized protein	3.47793
Cc03_g13870	GSCOC_T00031756001	disease resistance RGA4	3.47732
Cc04_g01310	GSCOC_T00021774001	Uncharacterized protein Mb2734	3.47467
Cc07_g13930	GSCOC_T00036676001	UDP-rhamnose:rhamnosyltransferase 1	3.47442
Cc07_g17220	GSCOC_T00037463001	late blight resistance homolog R1B-17	3.47239
Cc00_g10630	GSCOC_T00003947001	Pentatricopeptide repeat-containing At4g16470	3.47203
Cc09_g09160	GSCOC_T00023090001	Purine permease 21	3.47121
Cc02_g01840	GSCOC_T00020020001	Bidirectional sugar transporter SWEET3	3.4696
Cc09_g09690	GSCOC_T00004097001	Probable tocopherol O- chloroplastic	3.4625
Cc06_g18190	GSCOC_T00040424001	Uncharacterized protein	3.45867
Cc02_g18490	GSCOC_T00014394001	Proline--tRNA ligase	3.45082
Cc00_g16840	GSCOC_T00007766001	Disease resistance RGA2	3.4433
Cc02_g26700	GSCOC_T00024972001	Non-specific lipid-transfer 4	3.42704
Cc11_g03870	GSCOC_T00033996001	Glycerophosphodiester periplasmic	3.42495
Cc00_g03700	GSCOC_T00013256001	Codeine O-demethylase	3.41791
Cc00_g35420	GSCOC_T00013778001	disease resistance RGA3	3.39695
Cc00_g31470	GSCOC_T00012294001	Disease resistance RPM1	3.39693
Cc00_g11560	GSCOC_T00003165001	Disease resistance RGA2	3.38889
Cc08_g00010	GSCOC_T00005552001	Uncharacterized protein	3.3753
Cc00_g32520	GSCOC_T00006855001	disease resistance RGA4	3.37499
Cc00_g11350	GSCOC_T00007943001	Beta-glucosidase 11	3.37488
Cc00_g11990	GSCOC_T00000023001	disease resistance RGA4	3.3679
Cc00_g00450	GSCOC_T00036131001	Arginine decarboxylase	3.35932
Cc01_g03450	GSCOC_T00033106001	MDIS1-interacting receptor like kinase 2	3.35194
Cc06_g19590	GSCOC_T00029026001	UDP-glucose flavonoid 3-O-glucosyltransferase 6	3.34614
Cc06_g00990	GSCOC_T00023305001	Myb family transcription factor At1g14600	3.34063
Cc02_g34000	GSCOC_T00008655001	Transcription factor bHLH19	3.33798
Cc00_g33350	GSCOC_T00003077001	Uncharacterized protein	3.33229
Cc00_g27000	GSCOC_T00012522001	Disease resistance ADR1	3.32981
Cc04_g15650	GSCOC_T00042341001	Momilactone A synthase	3.32795
Cc09_g04900	GSCOC_T00007059001	Probable splicing factor 3A subunit 1	3.3277
Cc02_g39990	GSCOC_T00027631001	LHY	3.3103
Cc00_g14480	GSCOC_T00007441001	MDIS1-interacting receptor like kinase 2	3.30836
Cc03_g09790	GSCOC_T00030969001	Probable aldo-keto reductase 2	3.30467
Cc00_g32090	GSCOC_T00012293001	Cell division control 48 homolog B	3.29325
Cc07_g07900	GSCOC_T00040152001	Nodulation receptor kinase	3.28602
Cc00_g02930	GSCOC_T00004314001	F-box kelch-repeat At3g06240	3.27666
Cc05_g06930	GSCOC_T00042210001	Probable polyol transporter 4	3.27607
Cc00_g34490	GSCOC_T00004243001	disease resistance RPP13 1	3.26981
Cc01_g00930	GSCOC_T00038009001	Disease resistance RGA2	3.25188
Cc01_g01770	GSCOC_T00037850001	disease resistance RPP13 1	3.24643
Cc07_g07730	GSCOC_T00040133001	Phosphoenolpyruvate carboxykinase (ATP)	3.2362
Cc11_g00830	GSCOC_T00019693001	Trimethylguanosine synthase	3.2362
Cc01_g06460	GSCOC_T00030030001	Cysteine-rich receptor kinase 10	3.22799
Cc03_g15350	GSCOC_T00026814001	(+)-pulegone reductase	3.22019
Cc02_g22000	GSCOC_T00014855001	Actin-7	3.21886
Cc00_g16530	GSCOC_T00002357001	Probable acyl-activating enzyme peroxisomal	3.21629
Cc00_g14360	GSCOC_T00003654001	late blight resistance homolog R1A-6	3.21523
Cc00_g03730	GSCOC_T00013259001	SRG1	3.21203
Cc06_g22490	GSCOC_T00012876001	UDP-glucose flavonoid 3-O-glucosyltransferase 6	3.21135
Cc11_g08360	GSCOC_T00032886001	MLP 31	3.19508
Cc04_g14730	GSCOC_T00040735001	disease resistance RPP13 1	3.19206
Cc05_g02320	GSCOC_T00001628001	UDP-glucose flavonoid 3-O-glucosyltransferase 6	3.19126
Cc03_g14900	GSCOC_T00026739001	Probable glutathione S-transferase	3.18512
Cc09_g05580	GSCOC_T00033445001	Probable LRR receptor-like serine threonine- kinase At3g47570	3.18398
Cc03_g12720	GSCOC_T00015166001	disease resistance RGA4	3.17156
Cc09_g02220	GSCOC_T00017704001	DNA replication licensing factor MCM3 homolog 1	3.17053
Cc04_g09650	GSCOC_T00008124001	Actin-related 4	3.16827
Cc02_g23600	GSCOC_T00015060001	NRT1 PTR FAMILY	3.16467
Cc10_g09340	GSCOC_T00031558001	12-oxophytodienoate reductase 2	3.15824
Cc00_g29140	GSCOC_T00009019001	Glutamate receptor	3.14655
Cc00_g17420	GSCOC_T00007267001	Uncharacterized protein	3.14086
Cc11_g07510	GSCOC_T00018046001	Leucine-rich repeat receptor-like serine threonine- kinase At1g17230	3.13943
Cc03_g12260	GSCOC_T00015250001	Desiccation-related PCC13-62	3.13581
Cc00_g00750	GSCOC_T00036189001	F-box At5g07610	3.13
Cc09_g05250	GSCOC_T00007102001	Uncharacterized protein	3.12682
Cc10_g08670	GSCOC_T00034360001	Uncharacterized protein	3.12528
Cc00_g26350	GSCOC_T00005406001	SRG1	3.11733
Cc08_g10630	GSCOC_T00027035001	Uncharacterized protein	3.11474
Cc00_g20570	GSCOC_T00008769001	Pentatricopeptide repeat-containing At5g27460	3.11116
Cc10_g12120	GSCOC_T00031899001	Germin subfamily 1 member 7	3.11005
Cc02_g07170	GSCOC_T00009484001	UDP-glycosyltransferase 85A2	3.10387
Cc06_g20550	GSCOC_T00022998001	Pentatricopeptide repeat-containing mitochondrial	3.10199
Cc08_g04220	GSCOC_T00034235001	disease resistance RGA1	3.09893
Cc07_g05600	GSCOC_T00039837001	(S)-hydroxynitrile lyase	3.09781
Cc11_g11880	GSCOC_T00032386001	Uncharacterized protein	3.09331
Cc05_g10480	GSCOC_T00021435001	Secologanin synthase	3.09314
Cc07_g09120	GSCOC_T00040308001	Anthocyanidin 3-O-glucosyltransferase 5	3.08739
Cc04_g15740	GSCOC_T00042352001	NRT1 PTR FAMILY	3.07951
Cc06_g04360	GSCOC_T00042945001	Probable xyloglucan endotransglucosylase hydrolase 32	3.07634
Cc03_g08650	GSCOC_T00033294001	MDIS1-interacting receptor like kinase 2	3.07501
Cc06_g12210	GSCOC_T00041565001	Probable serine threonine- kinase PBL8	3.07042
Cc06_g22350	GSCOC_T00017197001	F-box At5g07610	3.06012
Cc00_g11590	GSCOC_T00007371001	Transcription factor MYB21	3.05737
Cc05_g06570	GSCOC_T00042153001	Uncharacterized protein	3.05443
Cc10_g13070	GSCOC_T00035347001	Cyanidin-3-O-glucoside 2-O-glucuronosyltransferase	3.05356
Cc00_g15680	GSCOC_T00011279001	disease resistance RGA4	3.05111
Cc08_g10540	GSCOC_T00027023001	Calcineurin B 9	3.04986
Cc01_g06150	GSCOC_T00027453001	LRR receptor-like serine threonine- kinase EFR	3.04019
Cc00_g32580	GSCOC_T00010260001	Disease resistance RPM1	3.03738
Cc00_g20580	GSCOC_T00007455001	5-epiaristolochene synthase	3.03728
Cc03_g12690	GSCOC_T00015174001	disease resistance RGA4	3.03315
Cc00_g06620	GSCOC_T00007483001	Dihydroflavonol 4-reductase	3.0231
Cc09_g09090	GSCOC_T00023108001	Probable purine permease 10	3.01958
Cc00_g14970	GSCOC_T00004040001	Cactin	3.0108
Cc01_g10050	GSCOC_T00024084001	Agmatine coumaroyltransferase-2	3.00346
Cc00_g27540	GSCOC_T00000280001	Uncharacterized protein	3.00311
Cc04_g14550	GSCOC_T00040700001	Secologanin synthase	2.99971
Cc00_g12030	GSCOC_T00000029001	disease resistance RGA4	2.99883
Cc01_g01720	GSCOC_T00037857001	disease resistance RGA1	2.99538
Cc03_g08930	GSCOC_T00042746001	Uncharacterized protein	2.98717
Cc06_g13550	GSCOC_T00041381001	Kaempferol 3-O-beta-D-galactosyltransferase	2.98443
Cc00_g29510	GSCOC_T00011855001	disease resistance RGA4	2.98073
Cc03_g12430	GSCOC_T00015220001	GDSL esterase lipase 5	2.97914
Cc05_g16520	GSCOC_T00038548001	G2 mitotic-specific cyclin-1	2.97363
Cc10_g10080	GSCOC_T00031458001	Multiple C2 and transmembrane domain-containing 1	2.96407
Cc00_g35430	GSCOC_T00007032001	Serine threonine- kinase SAPK3	2.96049
Cc02_g16580	GSCOC_T00014151001	Uncharacterized protein	2.95718
Cc05_g07250	GSCOC_T00042252001	Uncharacterized protein	2.95559
Cc00_g30480	GSCOC_T00003185001	Disease resistance RGA2	2.94977
Cc03_g12780	GSCOC_T00015156001	Uncharacterized protein	2.94578
Cc07_g15940	GSCOC_T00037630001	Cytochrome P450 84A1	2.94315
Cc07_g05590	GSCOC_T00039836001	Probable esterase PIR7A	2.94297
Cc05_g00800	GSCOC_T00013171001	Hevamine-A	2.93753
Cc00_g24790	GSCOC_T00009181001	Pentatricopeptide repeat-containing chloroplastic	2.92747
Cc01_g06760	GSCOC_T00030076001	6-hydroxynicotinate 3-monooxygenase	2.92689
Cc11_g01030	GSCOC_T00019655001	Proline--tRNA ligase	2.92422
Cc06_g19680	GSCOC_T00029037001	Disease resistance At4g27190	2.92419
Cc01_g01790	GSCOC_T00037847001	Disease resistance RGA2	2.92409
Cc09_g00470	GSCOC_T00017946001	Uncharacterized protein	2.92375
Cc07_g10920	GSCOC_T00037058001	Rhodanese-like domain-containing 17	2.91464
Cc05_g01410	GSCOC_T00018219001	Pentatricopeptide repeat-containing At4g21065	2.91444
Cc00_g28930	GSCOC_T00008415001	UPF0481 At3g47200	2.91115
Cc00_g02040	GSCOC_T00001836001	Probable disease resistance At4g27220	2.90978
Cc05_g08330	GSCOC_T00016851001	Uncharacterized protein	2.89311
Cc00_g09160	GSCOC_T00011964001	Disease resistance RGA2	2.88432
Cc03_g06630	GSCOC_T00026474001	Insulin-degrading enzyme-like peroxisomal	2.88185
Cc08_g01670	GSCOC_T00038348001	Disease resistance RPM1	2.88057
Cc00_g11130	GSCOC_T00009397001	disease resistance RGA3	2.8789
Cc00_g26210	GSCOC_T00010475001	Uncharacterized protein	2.87466
Cc06_g16180	GSCOC_T00030726001	Disease resistance RPP8 3	2.87354
Cc11_g01620	GSCOC_T00019540001	6-hydroxynicotinate 3-monooxygenase	2.87087
Cc00_g23940	GSCOC_T00011723001	disease resistance RGA3	2.86452
Cc07_g14450	GSCOC_T00036613001	Uncharacterized protein	2.85996
Cc03_g00940	GSCOC_T00025693001	DELLA RGL2	2.85896
Cc01_g00500	GSCOC_T00011029001	50S ribosomal chloroplastic	2.85747
Cc01_g02340	GSCOC_T00009721001	Uncharacterized protein	2.85221
Cc08_g02920	GSCOC_T00037793001	Uncharacterized protein	2.84783
Cc11_g01050	GSCOC_T00019651001	Probable RNA helicase SDE3	2.84252
Cc09_g05900	GSCOC_T00033390001	wall-associated receptor kinase-like 11	2.83903
Cc01_g01780	GSCOC_T00037849001	ALWAYS EARLY 3	2.83093
Cc04_g06810	GSCOC_T00022480001	Uncharacterized protein	2.82106
Cc03_g10620	GSCOC_T00004056001	MDIS1-interacting receptor like kinase 2	2.81318
Cc08_g01640	GSCOC_T00038355001	Disease resistance RPM1	2.80971
Cc06_g14430	GSCOC_T00041257001	glutamine amidotransferase YLR126C	2.80797
Cc05_g14330	GSCOC_T00038831001	Indole-3-acetate O-methyltransferase 1	2.8061
Cc01_g01620	GSCOC_T00037876001	Transmembrane 45B	2.80285
Cc02_g26540	GSCOC_T00024951001	disease resistance At3g14460	2.79969
Cc02_g27350	GSCOC_T00025065001	Uncharacterized protein	2.79907
Cc02_g05510	GSCOC_T00039062001	Uncharacterized protein	2.79733
Cc03_g11380	GSCOC_T00019335001	Glucose-6-phosphate 1- chloroplastic	2.79086
Cc00_g01420	GSCOC_T00010644001	L-type lectin-domain containing receptor kinase	2.79029
Cc11_g15160	GSCOC_T00001009001	Uncharacterized protein	2.78957
Cc07_g11790	GSCOC_T00036958001	Uncharacterized protein	2.78204
Cc00_g05520	GSCOC_T00006858001	Codeine O-demethylase	2.7819
Cc02_g27360	GSCOC_T00025066001	30S ribosomal chloroplastic	2.7803
Cc00_g03900	GSCOC_T00007596001	Uncharacterized protein	2.77591
Cc03_g12610	GSCOC_T00015192001	Cytochrome P450 704C1	2.77151
Cc01_g03420	GSCOC_T00033110001	Probable leucine-rich repeat receptor kinase At1g35710	2.76847
Cc11_g00760	GSCOC_T00019758001	Cysteine-rich receptor kinase 25	2.75563
Cc07_g13530	GSCOC_T00036725001	RSI-1	2.74647
Cc02_g11910	GSCOC_T00029357001	Transcription factor DYT1	2.74621
Cc06_g02660	GSCOC_T00023525001	Uncharacterized protein	2.74596
Cc11_g04200	GSCOC_T00001333001	Phosphoribosylformylglycinamidine cyclo- chloroplastic mitochondrial	2.74511
Cc00_g26460	GSCOC_T00008104001	disease resistance RGA4	2.73622
Cc04_g11910	GSCOC_T00037403001	F-box kelch-repeat At3g06240	2.7355
Cc04_g12650	GSCOC_T00012779001	Disease resistance RPP13	2.73443
Cc01_g20530	GSCOC_T00015921001	Zinc finger NUTCRACKER	2.72157
Cc10_g08180	GSCOC_T00034427001	Uncharacterized protein sll0103	2.71811
Cc00_g01900	GSCOC_T00002988001	Uncharacterized protein	2.71724
Cc02_g00220	GSCOC_T00019798001	Syntaxin-22	2.71663
Cc03_g11680	GSCOC_T00043187001	disease resistance RGA4	2.70893
Cc00_g33230	GSCOC_T00003235001	disease resistance RGA3	2.7066
Cc08_g08860	GSCOC_T00017220001	BURP domain RD22	2.70348
Cc07_g06530	GSCOC_T00039963001	DETOXIFICATION 6	2.70201
Cc10_g01800	GSCOC_T00024668001	Probable diphthine methyl ester synthase	2.70196
Cc00_g04090	GSCOC_T00013736001	pentatricopeptide repeat-containing mitochondrial	2.70112
Cc03_g14240	GSCOC_T00031818001	sodium-coupled neutral amino acid transporter 10	2.69556
Cc11_g01610	GSCOC_T00019541001	Polyamine oxidase 3	2.68707
Cc02_g36450	GSCOC_T00003923001	Cytochrome P450 704C1	2.68362
Cc11_g16840	GSCOC_T00038231001	Uncharacterized protein	2.68201
Cc00_g21060	GSCOC_T00001399001	Clathrin heavy chain 1	2.68168
Cc00_g25150	GSCOC_T00013489001	disease resistance RGA4	2.67911
Cc11_g08520	GSCOC_T00032862001	Probable sulfate transporter	2.67894
Cc05_g07530	GSCOC_T00042284001	Extracellular ribonuclease LE	2.67631
Cc09_g02490	GSCOC_T00017670001	Uncharacterized protein	2.67526
Cc10_g00660	GSCOC_T00024523001	Probable flavin-containing monooxygenase 1	2.67141
Cc10_g13160	GSCOC_T00035332001	Transcription factor MYB44	2.66692
Cc01_g08210	GSCOC_T00015514001	Peroxidase 64	2.66677
Cc11_g08750	GSCOC_T00032830001	late blight resistance homolog R1B-12	2.66522
Cc08_g01690	GSCOC_T00038346001	Protein-lysine methyltransferase METTL21D	2.66102
Cc10_g04950	GSCOC_T00034871001	Uncharacterized protein	2.65874
Cc04_g16150	GSCOC_T00042407001	Uncharacterized protein	2.65825
Cc10_g09560	GSCOC_T00031528001	Uncharacterized protein	2.65794
Cc02_g22330	GSCOC_T00014902001	Basic blue	2.65293
Cc08_g01750	GSCOC_T00038339001	Cytochrome c oxidase subunit 6b-2	2.65091
Cc03_g13730	GSCOC_T00031728001	Polygalacturonase-1 non-catalytic subunit beta	2.64968
Cc05_g01910	GSCOC_T00015781001	Anthocyanidin 3-O-glucosyltransferase 6 (Fragment)	2.64403
Cc00_g22200	GSCOC_T00012731001	Uncharacterized protein	2.64073
Cc07_g02690	GSCOC_T00039474001	NRT1 PTR FAMILY	2.63832
Cc00_g02940	GSCOC_T00004315001	Uncharacterized protein	2.63773
Cc06_g18700	GSCOC_T00040496001	Probable tocopherol O- chloroplastic	2.6322
Cc01_g08200	GSCOC_T00015513001	Probable leucine-rich repeat receptor kinase At5g49770	2.63148
Cc03_g13940	GSCOC_T00031763001	disease resistance RGA1	2.62944
Cc11_g10420	GSCOC_T00032581001	late blight resistance homolog R1A-6	2.61877
Cc00_g05930	GSCOC_T00004280001	Pentatricopeptide repeat-containing At3g16610	2.61708
Cc08_g05280	GSCOC_T00007027001	Topless-related 4	2.6151
Cc06_g08370	GSCOC_T00031139001	EIN3-binding F-box 1	2.61362
Cc00_g09790	GSCOC_T00012508001	Disease resistance RGA2	2.61296
Cc04_g03850	GSCOC_T00022100001	Uncharacterized protein	2.61207
Cc02_g29890	GSCOC_T00038914001	disease resistance RPP13 1	2.61097
Cc00_g17510	GSCOC_T00000103001	Uncharacterized protein	2.59666
Cc00_g08840	GSCOC_T00011516001	Thymidine kinase	2.59552
Cc08_g08480	GSCOC_T00009041001	DNA polymerase theta	2.59301
Cc11_g11320	GSCOC_T00032461001	chloroplastic	2.58812
Cc01_g16460	GSCOC_T00016438001	mRNA-capping enzyme	2.58501
Cc00_g31120	GSCOC_T00009994001	disease resistance RGA4	2.58071
Cc06_g14280	GSCOC_T00041277001	S-adenosylmethionine decarboxylase proenzyme	2.58041
Cc02_g31470	GSCOC_T00027552001	Vinorine synthase	2.57844
Cc03_g12440	GSCOC_T00015219001	GDSL esterase lipase 1	2.57335
Cc01_g05640	GSCOC_T00027374001	Uncharacterized protein	2.56987
Cc04_g14570	GSCOC_T00040708001	Secologanin synthase	2.56427
Cc06_g07220	GSCOC_T00031292001	Lysosomal beta glucosidase	2.55913
Cc05_g03310	GSCOC_T00033540001	Proline-rich receptor kinase PERK8	2.55727
Cc08_g17150	GSCOC_T00035704001	Uncharacterized protein	2.55579
Cc07_g16060	GSCOC_T00037613001	Nuclear transcription factor Y subunit B-3	2.55351
Cc00_g21540	GSCOC_T00013683001	Disease resistance RPM1	2.55336
Cc01_g02360	GSCOC_T00009718001	Uncharacterized protein	2.5524
Cc02_g36480	GSCOC_T00003920001	F-box LRR-repeat At3g03360	2.54834
Cc06_g21680	GSCOC_T00015560001	cadmium zinc-transporting ATPase HMA4	2.54664
Cc02_g09690	GSCOC_T00029621001	Uncharacterized protein	2.5466
Cc07_g15300	GSCOC_T00036494001	Uncharacterized protein	2.54211
Cc00_g10130	GSCOC_T00009187001	Exosome component 10	2.54205
Cc00_g23630	GSCOC_T00001062001	Disease resistance RGA2	2.54176
Cc00_g00100	GSCOC_T00036083001	Uncharacterized protein	2.54092
Cc02_g29190	GSCOC_T00004494001	F-box FBD LRR-repeat At4g26340	2.54082
Cc08_g04990	GSCOC_T00042462001	Uncharacterized protein	2.53622
Cc06_g01110	GSCOC_T00023322001	Late embryogenesis abundant	2.53502
Cc00_g19460	GSCOC_T00012669001	Uncharacterized protein	2.53057
Cc00_g28300	GSCOC_T00005953001	disease resistance RGA4	2.52931
Cc03_g08530	GSCOC_T00033275001	disease resistance RGA3	2.52375
Cc01_g05840	GSCOC_T00027410001	Bidirectional sugar transporter SWEET3b	2.51803
Cc02_g30460	GSCOC_T00023763001	Perakine reductase	2.51467
Cc08_g07660	GSCOC_T00025409001	Uncharacterized protein	2.51453
Cc00_g27700	GSCOC_T00008599001	disease resistance RGA3	2.50124
Cc00_g01040	GSCOC_T00015800001	Uncharacterized protein	2.50061
Cc10_g11520	GSCOC_T00008276001	Wall-associated receptor kinase 2	2.49969
Cc00_g29650	GSCOC_T00004721001	Disease resistance RPM1	2.49937
Cc05_g00810	GSCOC_T00013173001	Hevamine-A	2.4987
Cc02_g06610	GSCOC_T00039203001	Uncharacterized protein	2.49626
Cc11_g15370	GSCOC_T00038047001	Uncharacterized protein	2.49559
Cc00_g26860	GSCOC_T00001075001	Uncharacterized protein	2.4944
Cc03_g11190	GSCOC_T00042079001	Asparagine synthetase domain-containing 1	2.49385
Cc08_g06180	GSCOC_T00040974001	Receptor kinase 2	2.49131
Cc00_g29130	GSCOC_T00010957001	ROOT HAIR DEFECTIVE 3 homolog 1	2.48937
Cc10_g10920	GSCOC_T00016644001	Auxin-induced 5NG4	2.48912
Cc03_g09870	GSCOC_T00030977001	Probable aldo-keto reductase 2	2.48771
Cc00_g15110	GSCOC_T00008523001	Uncharacterized protein	2.48611
Cc07_g20540	GSCOC_T00015721001	CCR4-NOT transcription complex subunit 11	2.48524
Cc00_g30520	GSCOC_T00013512001	Miraculin	2.48219
Cc02_g17460	GSCOC_T00014263001	Epoxide hydrolase 3	2.47918
Cc06_g12890	GSCOC_T00041479001	Uncharacterized protein	2.4776
Cc00_g04980	GSCOC_T00005519001	Uncharacterized protein	2.47686
Cc06_g09430	GSCOC_T00041915001	Uncharacterized protein	2.47591
Cc01_g17900	GSCOC_T00016268001	Uncharacterized protein	2.47369
Cc10_g09140	GSCOC_T00034291001	Probable serine threonine- kinase At1g54610	2.47021
Cc11_g02040	GSCOC_T00033036001	Probable disease resistance RXW24L	2.46477
Cc00_g32700	GSCOC_T00005667001	Disease resistance RGA2	2.46405
Cc11_g09460	GSCOC_T00032721001	late blight resistance homolog R1A-6	2.46187
Cc07_g02050	GSCOC_T00039385001	Uncharacterized protein	2.46045
Cc10_g06600	GSCOC_T00034634001	Uncharacterized protein	2.45997
Cc11_g12170	GSCOC_T00032353001	Beta-glucosidase 40	2.45915
Cc06_g07740	GSCOC_T00031221001	SRG1	2.45504
Cc03_g07180	GSCOC_T00026560001	Uncharacterized protein	2.4474
Cc06_g02470	GSCOC_T00023503001	Laccase-17	2.44738
Cc10_g13930	GSCOC_T00035219001	Probable LRR receptor-like serine threonine- kinase At2g16250	2.44582
Cc00_g21560	GSCOC_T00000840001	Probable WRKY transcription factor 72	2.4452
Cc06_g07180	GSCOC_T00031296001	Uncharacterized protein	2.43484
Cc01_g01150	GSCOC_T00037975001	Uncharacterized protein	2.42983
Cc00_g30920	GSCOC_T00002387001	Uncharacterized protein	2.42517
Cc00_g04500	GSCOC_T00013588001	Indole-3-acetic acid-amido synthetase	2.42343
Cc08_g08270	GSCOC_T00007241001	B3 domain-containing REM15	2.42191
Cc02_g21300	GSCOC_T00014767001	UDP-glycosyltransferase 85A2	2.41518
Cc08_g05270	GSCOC_T00007026001	disease resistance RGA1	2.41453
Cc03_g03420	GSCOC_T00026027001	Probable carboxylesterase 2	2.41234
Cc08_g02850	GSCOC_T00037780001	Uncharacterized protein	2.41152
Cc08_g02030	GSCOC_T00037662001	Disease resistance RPM1	2.41031
Cc06_g20230	GSCOC_T00022936001	NRT1 PTR FAMILY	2.40977
Cc10_g13340	GSCOC_T00035310001	Uncharacterized acetyltransferase At3g50280	2.40423
Cc00_g03440	GSCOC_T00000276001	DNA replication complex GINS SLD5	2.40408
Cc08_g01620	GSCOC_T00038359001	Disease resistance RPM1	2.40256
Cc01_g13580	GSCOC_T00028328001	kDa class I heat shock	2.3985
Cc09_g08830	GSCOC_T00023161001	Probable LRR receptor-like serine threonine- kinase At3g47570	2.39825
Cc02_g02350	GSCOC_T00020088001	Heat shock 83	2.39477
Cc02_g16340	GSCOC_T00014117001	Uncharacterized protein	2.39232
Cc08_g08220	GSCOC_T00007248001	Molybdate transporter 2	2.38713
Cc04_g15990	GSCOC_T00042389001	HIPL2	2.3859
Cc00_g06550	GSCOC_T00005831001	Gibberellin 20 oxidase 1	2.3841
Cc00_g36000	GSCOC_T00005871001	Secologanin synthase	2.38378
Cc07_g12590	GSCOC_T00036854001	syntaxin-24	2.3779
Cc00_g13150	GSCOC_T00011730001	Disease resistance At4g27190	2.37488
Cc08_g01660	GSCOC_T00038350001	Disease resistance RPM1	2.37264
Cc06_g19300	GSCOC_T00028987001	Uncharacterized protein	2.37142
Cc06_g03830	GSCOC_T00023679001	Fasciclin-like arabinogalactan 11	2.36896
Cc00_g26670	GSCOC_T00002359001	disease resistance RGA1	2.3548
Cc07_g16180	GSCOC_T00037596001	Monothiol glutaredoxin-S6	2.3441
Cc06_g08240	GSCOC_T00031156001	Stellacyanin	2.34322
Cc11_g04630	GSCOC_T00004822001	Uncharacterized protein	2.34143
Cc07_g19950	GSCOC_T00033902001	Uncharacterized protein	2.33983
Cc08_g04230	GSCOC_T00034238001	disease resistance RGA4	2.3396
Cc01_g15820	GSCOC_T00016514001	UDP-glycosyltransferase 74F2	2.33938
Cc04_g02100	GSCOC_T00021878001	ABC transporter C family member 8	2.33926
Cc03_g12660	GSCOC_T00015184001	disease resistance RGA3	2.33765
Cc03_g10430	GSCOC_T00031060001	late blight resistance homolog R1B-12	2.33011
Cc05_g04760	GSCOC_T00035011001	Vacuolar amino acid transporter 1	2.32831
Cc00_g34900	GSCOC_T00004612001	AC transposase	2.32721
Cc00_g15930	GSCOC_T00007989001	Uncharacterized protein	2.325
Cc05_g05650	GSCOC_T00035140001	Calcium-binding PBP1	2.32342
Cc07_g17590	GSCOC_T00018878001	G-type lectin S-receptor-like serine threonine- kinase RLK1	2.31807
Cc00_g09310	GSCOC_T00008201001	RING-H2 finger ATL21A	2.318
Cc00_g01620	GSCOC_T00002732001	Uncharacterized protein	2.31795
Cc07_g20550	GSCOC_T00015722001	Uncharacterized protein	2.31522
Cc07_g18540	GSCOC_T00018737001	Probable polygalacturonase	2.31516
Cc00_g30460	GSCOC_T00012255001	Probable E3 ubiquitin- ligase RNF217	2.31442
Cc09_g06080	GSCOC_T00033365001	LRR receptor-like serine threonine- kinase FLS2	2.31138
Cc08_g04540	GSCOC_T00015645001	Uncharacterized protein	2.31103
Cc00_g20190	GSCOC_T00006539001	Exosome complex component rrp4	2.311
Cc06_g02260	GSCOC_T00023477001	Probable E3 ubiquitin- ligase HERC1	2.30882
Cc00_g25800	GSCOC_T00009824001	Uncharacterized protein	2.30697
Cc06_g08780	GSCOC_T00031087001	Uncharacterized protein	2.30637
Cc00_g30560	GSCOC_T00008218001	disease resistance RGA3	2.3052
Cc01_g09730	GSCOC_T00024037001	Stress-response A B barrel domain-containing At5g22580	2.30138
Cc08_g07010	GSCOC_T00025295001	Patatin group A-3	2.29984
Cc00_g02060	GSCOC_T00001838001	Uncharacterized protein	2.29875
Cc07_g12510	GSCOC_T00036863001	ATP-dependent zinc metalloprotease FTSH chloroplastic	2.29847
Cc00_g13690	GSCOC_T00009570001	Probable aldo-keto reductase 2	2.29547
Cc00_g01320	GSCOC_T00010926001	late blight resistance homolog R1B-14	2.29495
Cc10_g01690	GSCOC_T00024654001	Snakin-2	2.29429
Cc00_g33270	GSCOC_T00009119001	Cytochrome P450 71A26	2.29293
Cc06_g19050	GSCOC_T00028954001	Benzyl alcohol O-benzoyltransferase	2.29278
Cc03_g10320	GSCOC_T00031044001	late blight resistance homolog R1B-14	2.29256
Cc10_g13360	GSCOC_T00035305001	Uncharacterized protein	2.29132
Cc00_g24370	GSCOC_T00009147001	Disease resistance RPM1	2.29051
Cc00_g35970	GSCOC_T00007523001	Probable LRR receptor-like serine threonine- kinase At2g16250	2.28993
Cc00_g01780	GSCOC_T00002847001	Uncharacterized protein	2.28853
Cc02_g13000	GSCOC_T00029212001	NADPH:quinone oxidoreductase	2.28652
Cc01_g01410	GSCOC_T00037911001	Uncharacterized protein	2.28532
Cc04_g14510	GSCOC_T00040693001	Subtilisin inhibitor 1	2.28382
Cc06_g02330	GSCOC_T00023487001	cyclin-D7-1	2.28082
Cc02_g13700	GSCOC_T00029111001	Ethylene-responsive transcription factor 9	2.27615
Cc09_g01710	GSCOC_T00017773001	Uncharacterized protein	2.27408
Cc06_g23000	GSCOC_T00040640001	Thymidylate kinase	2.27322
Cc00_g29260	GSCOC_T00011966001	eIF-2-alpha kinase GCN2	2.26717
Cc06_g01050	GSCOC_T00023312001	LRR receptor-like serine threonine- kinase GSO2	2.26616
Cc04_g12540	GSCOC_T00005318001	Cell division cycle 48 homolog	2.26221
Cc01_g00920	GSCOC_T00038010001	disease resistance RGA3	2.26212
Cc00_g10430	GSCOC_T00005154001	Subtilisin-like protease	2.26035
Cc06_g09540	GSCOC_T00041900001	Multi -bridging factor 1c	2.25819
Cc00_g12530	GSCOC_T00002072001	ALWAYS EARLY 3	2.25688
Cc00_g15950	GSCOC_T00007991001	Uncharacterized protein	2.25265
Cc11_g09430	GSCOC_T00032726001	late blight resistance homolog R1A-6	2.24873
Cc00_g20920	GSCOC_T00001074001	Thymidine kinase	2.24845
Cc07_g19000	GSCOC_T00018653001	Probable calcium-binding CML25	2.24672
Cc11_g16860	GSCOC_T00038234001	Cytochrome P450 78A4	2.24492
Cc00_g13480	GSCOC_T00010148001	Uncharacterized protein	2.23945
Cc01_g05850	GSCOC_T00027411001	Bidirectional sugar transporter SWEET3	2.23927
Cc07_g14220	GSCOC_T00036643001	Uncharacterized protein	2.23473
Cc09_g09190	GSCOC_T00023086001	WRKY transcription factor 28	2.23367
Cc01_g01220	GSCOC_T00037961001	Uncharacterized protein	2.23112
Cc00_g25830	GSCOC_T00001794001	1-aminocyclopropane-1-carboxylate oxidase 4	2.2263
Cc11_g09390	GSCOC_T00032734001	Disease resistance RPP13	2.22571
Cc08_g04510	GSCOC_T00015640001	Uncharacterized protein	2.22522
Cc02_g25240	GSCOC_T00028775001	Uncharacterized protein	2.22504
Cc00_g02350	GSCOC_T00012209001	Uncharacterized protein	2.22296
Cc06_g06800	GSCOC_T00031339001	Uncharacterized protein	2.22284
Cc07_g09190	GSCOC_T00040315001	Phaseolin	2.22194
Cc02_g08420	GSCOC_T00029795001	Uncharacterized protein	2.21962
Cc04_g14640	GSCOC_T00040722001	L-type lectin-domain containing receptor kinase	2.21885
Cc10_g06610	GSCOC_T00034633001	Uncharacterized protein	2.21733
Cc03_g11720	GSCOC_T00043191001	disease resistance RGA3	2.21374
Cc03_g13610	GSCOC_T00031705001	L-type lectin-domain containing receptor kinase	2.2125
Cc08_g02240	GSCOC_T00037686001	Leucine-rich repeat receptor-like serine threonine- kinase BAM1	2.21049
Cc00_g17520	GSCOC_T00000104001	disease resistance RGA3	2.20992
Cc03_g14300	GSCOC_T00031828001	Uncharacterized protein	2.20953
Cc02_g23890	GSCOC_T00015093001	transport Sec1a	2.20844
Cc11_g04390	GSCOC_T00004778001	Uncharacterized protein	2.20405
Cc00_g16370	GSCOC_T00011224001	Glutamate receptor	2.20276
Cc11_g11310	GSCOC_T00032462001	chloroplastic	2.20043
Cc00_g32140	GSCOC_T00006453001	Pectinesterase 2	2.19885
Cc07_g08400	GSCOC_T00040213001	ATP synthase subunit mitochondrial	2.19815
Cc11_g05610	GSCOC_T00020521001	NAD(P)H-dependent 6 -deoxychalcone synthase	2.19004
Cc00_g11670	GSCOC_T00004164001	Pathogenesis-related P2	2.18765
Cc01_g07720	GSCOC_T00015445001	U5 small nuclear ribonucleo 200 kDa helicase	2.18758
Cc04_g13440	GSCOC_T00018287001	Snakin-2	2.18428
Cc00_g27600	GSCOC_T00000391001	late blight resistance homolog R1B-14	2.18425
Cc07_g13670	GSCOC_T00036708001	Geraniol dehydrogenase 1	2.18333
Cc06_g04470	GSCOC_T00042956001	Myb-related MYBAS1	2.18227
Cc03_g11290	GSCOC_T00004444001	Cell division control 48 homolog B	2.17897
Cc02_g36070	GSCOC_T00042754001	Uncharacterized protein	2.17894
Cc11_g03130	GSCOC_T00025463001	UDP-glycosyltransferase 76E2	2.17389
Cc02_g04780	GSCOC_T00020400001	pentatricopeptide repeat-containing At3g23330	2.17174
Cc01_g19020	GSCOC_T00016112001	Heat stress transcription factor A-6b	2.16969
Cc03_g15130	GSCOC_T00026773001	UDP-glycosyltransferase 74E2	2.16809
Cc08_g08850	GSCOC_T00017218001	UPF0481 At3g47200	2.16702
Cc01_g15300	GSCOC_T00016580001	Transcription factor RF2b	2.16598
Cc02_g07390	GSCOC_T00029947001	Probable E3 ubiquitin- ligase HERC1	2.16595
Cc03_g12940	GSCOC_T00030634001	Uncharacterized protein	2.16524
Cc00_g26020	GSCOC_T00004769001	Uncharacterized protein	2.16274
Cc02_g12760	GSCOC_T00029241001	Metal-nicotianamine transporter YSL1	2.1604
Cc00_g01660	GSCOC_T00002755001	Uncharacterized protein	2.15592
Cc11_g16360	GSCOC_T00038174001	Small heat shock chloroplastic	2.15146
Cc07_g20650	GSCOC_T00027318001	Conserved oligomeric Golgi complex subunit 6	2.14956
Cc03_g00720	GSCOC_T00025665001	Probable ubiquitin-conjugating enzyme E2 24	2.14953
Cc02_g33790	GSCOC_T00013092001	Probable linoleate 9S-lipoxygenase 5	2.14707
Cc06_g21520	GSCOC_T00008022001	Uncharacterized protein	2.14534
Cc00_g28280	GSCOC_T00000756001	SRG1	2.14468
Cc08_g05380	GSCOC_T00024300001	Ubiquinol oxidase mitochondrial	2.14445
Cc00_g12080	GSCOC_T00010891001	Uncharacterized protein	2.14377
Cc01_g00550	GSCOC_T00011035001	Disease resistance RGA2	2.14138
Cc06_g08250	GSCOC_T00031154001	Umecyanin	2.13893
Cc08_g04520	GSCOC_T00015641001	Uncharacterized protein	2.1382
Cc00_g27040	GSCOC_T00000981001	late blight resistance homolog R1B-16	2.13429
Cc00_g01410	GSCOC_T00010642001	L-type lectin-domain containing receptor kinase	2.13425
Cc09_g00800	GSCOC_T00017903001	Tonoplast dicarboxylate transporter	2.12897
Cc04_g15520	GSCOC_T00042324001	Mitochondrial outer membrane porin of 36 kDa	2.12826
Cc01_g01230	GSCOC_T00037960001	Uncharacterized protein	2.12799
Cc06_g15120	GSCOC_T00030878001	Uncharacterized protein	2.12729
Cc00_g32550	GSCOC_T00004755001	Serine carboxypeptidase-like 19	2.12525
Cc02_g23880	GSCOC_T00015092001	ABC transporter G family member 11	2.12381
Cc00_g12600	GSCOC_T00008307001	Probable ornithine aminotransferase	2.12284
Cc07_g20060	GSCOC_T00033921001	Probable glutathione S-transferase parC	2.12008
Cc02_g33000	GSCOC_T00016736001	Late blight resistance R1-A	2.11634
Cc05_g05950	GSCOC_T00035183001	Equilibrative nucleoside transporter 4	2.11451
Cc00_g30180	GSCOC_T00006926001	late blight resistance homolog R1A-6	2.11367
Cc00_g10960	GSCOC_T00006918001	Disease resistance RPM1	2.11057
Cc01_g09160	GSCOC_T00023961001	Serine carboxypeptidase-like 2	2.10802
Cc05_g06620	GSCOC_T00042163001	disease resistance RGA3	2.10681
Cc04_g15750	GSCOC_T00042353001	NRT1 PTR FAMILY	2.10618
Cc05_g02460	GSCOC_T00020964001	Disease resistance At4g27190	2.10524
Cc00_g10860	GSCOC_T00006577001	Uncharacterized protein	2.10388
Cc08_g13450	GSCOC_T00030343001	DETOXIFICATION 6	2.10299
Cc11_g17200	GSCOC_T00038279001	Uncharacterized protein	2.10139
Cc00_g08760	GSCOC_T00003176001	Pentatricopeptide repeat-containing At1g71420	2.10026
Cc02_g12320	GSCOC_T00029299001	MOTHER of FT and TFL1	2.09915
Cc07_g09960	GSCOC_T00037177001	Probable mitochondrial chaperone bcs1	2.09585
Cc00_g24960	GSCOC_T00003358001	disease resistance RGA1	2.09561
Cc02_g35850	GSCOC_T00042782001	Uncharacterized protein	2.09545
Cc11_g13370	GSCOC_T00032188001	SNF1-related kinase regulatory subunit gamma-1-like	2.09469
Cc02_g12150	GSCOC_T00029326001	Calcium-binding PBP1	2.09358
Cc06_g08220	GSCOC_T00031159001	LURP-one-related 12	2.09185
Cc07_g19280	GSCOC_T00018612001	Uncharacterized protein	2.087
Cc09_g02480	GSCOC_T00017671001	Uncharacterized protein	2.08644
Cc10_g11570	GSCOC_T00001425001	disease resistance At4g19050	2.08445
Cc07_g11610	GSCOC_T00036981001	Adipocyte plasma membrane-associated	2.0829
Cc00_g14960	GSCOC_T00004039001	Cactin	2.0818
Cc05_g08810	GSCOC_T00016913001	Secologanin synthase	2.07632
Cc06_g02040	GSCOC_T00023444001	Probable glutathione S-transferase	2.07519
Cc03_g13990	GSCOC_T00031780001	Disease resistance RPS2	2.07359
Cc00_g26240	GSCOC_T00012616001	NRT1 PTR FAMILY	2.07157
Cc02_g21410	GSCOC_T00014782001	Metacaspase-1	2.06843
Cc07_g19300	GSCOC_T00018610001	Malate dehydrogenase peroxisomal	2.06811
Cc00_g07460	GSCOC_T00008321001	Acyl- -binding	2.06691
Cc05_g01810	GSCOC_T00015766001	1-aminocyclopropane-1-carboxylate oxidase homolog 1	2.06609
Cc02_g04950	GSCOC_T00038987001	Pentatricopeptide repeat-containing chloroplastic	2.06411
Cc11_g00890	GSCOC_T00019682001	late blight resistance homolog R1B-17	2.06349
Cc05_g07890	GSCOC_T00016793001	8-hydroxyquercetin 8-O-methyltransferase	2.05889
Cc00_g06140	GSCOC_T00010052001	Indole-3-acetaldehyde oxidase	2.05701
Cc07_g18720	GSCOC_T00018709001	Probable S-adenosylmethionine-dependent methyltransferase At5g37990	2.05683
Cc03_g09930	GSCOC_T00030984001	Probable aldo-keto reductase 2	2.05509
Cc08_g05310	GSCOC_T00024284001	Probable urea active transporter 1	2.05469
Cc06_g22760	GSCOC_T00040673001	Probable S-acyltransferase 3	2.0527
Cc07_g19610	GSCOC_T00018541001	Xanthine dehydrogenase 1	2.044
Cc10_g15100	GSCOC_T00033677001	Ethylene-responsive transcription factor ABR1	2.04382
Cc03_g01200	GSCOC_T00025725001	Uncharacterized protein	2.04325
Cc05_g01850	GSCOC_T00015775001	GEM 5	2.04274
Cc07_g02720	GSCOC_T00039477001	Mannose-1-phosphate guanylyltransferase 1	2.04134
Cc00_g26570	GSCOC_T00002194001	Uncharacterized protein	2.03992
Cc02_g09680	GSCOC_T00029622001	Bifunctional purine biosynthesis	2.03977
Cc11_g05330	GSCOC_T00020479001	Flavonol 7-O-beta-glucosyltransferase UGT74F1	2.03454
Cc10_g12700	GSCOC_T00031989001	Cactin	2.03192
Cc00_g27360	GSCOC_T00009990001	Uncharacterized protein	2.03003
Cc10_g04750	GSCOC_T00034899001	UDP-glucose flavonoid 3-O-glucosyltransferase 7	2.02996
Cc02_g39670	GSCOC_T00027684001	Probable serine threonine- kinase WNK4	2.02868
Cc03_g10580	GSCOC_T00007798001	UDP-glycosyltransferase 73C4	2.02772
Cc05_g07420	GSCOC_T00042270001	DNA excision repair ERCC-6-like 2	2.02667
Cc00_g31340	GSCOC_T00007855001	Germin 1-2	2.02666
Cc09_g03630	GSCOC_T00017522001	MADS-box transcription factor 3	2.02362
Cc05_g00780	GSCOC_T00013169001	Acidic endochitinase	2.02333
Cc06_g12930	GSCOC_T00041471001	Uncharacterized protein	2.02046
Cc05_g02350	GSCOC_T00001634001	UDP-glucose flavonoid 3-O-glucosyltransferase 6	2.01814
Cc02_g30100	GSCOC_T00038963001	Cytokinin dehydrogenase 9	2.01405
Cc04_g07350	GSCOC_T00022548001	ASPARTIC PROTEASE IN GUARD CELL 1	2.01224
Cc10_g01830	GSCOC_T00024672001	Cytokinin riboside 5 -monophosphate phosphoribohydrolase LOG1	2.01204
Cc02_g20880	GSCOC_T00014710001	Uncharacterized protein	2.00968
Cc02_g29860	GSCOC_T00038897001	L-type lectin-domain containing receptor kinase	2.00918
Cc11_g00970	GSCOC_T00019670001	Mannosyl-oligosaccharide	2.0091
Cc06_g12120	GSCOC_T00041574001	Probable N-acetyltransferase san	2.00898
Cc00_g07410	GSCOC_T00008315001	Probable LRR receptor-like serine threonine- kinase At2g16250	2.0074
Cc05_g02870	GSCOC_T00020870001	Ribosomal RNA small subunit methyltransferase NEP1	2.00718
Cc02_g10760	GSCOC_T00029494001	Uncharacterized protein	2.00561
Cc06_g22480	GSCOC_T00012875001	UDP-glucose flavonoid 3-O-glucosyltransferase 6	2.00534
Cc00_g19960	GSCOC_T00003849001	Uncharacterized protein	2.00449
Cc09_g07410	GSCOC_T00036265001	Reticuline oxidase	2.002
Cc02_g21390	GSCOC_T00014780001	Metacaspase-3	1.99902
Cc01_g08330	GSCOC_T00015536001	Receptor 12	1.99086
Cc06_g03110	GSCOC_T00023583001	Uncharacterized protein	1.99042
Cc01_g16040	GSCOC_T00016489001	Glycine oxidase	1.98851
Cc02_g28460	GSCOC_T00009426001	Pentatricopeptide repeat-containing At1g09900	1.98826
Cc02_g33950	GSCOC_T00008643001	Uncharacterized protein	1.98651
Cc02_g07340	GSCOC_T00029952001	Delta-1-pyrroline-5-carboxylate synthase	1.98641
Cc10_g09820	GSCOC_T00031496001	Germin subfamily 1 member 13	1.98618
Cc07_g20660	GSCOC_T00027317001	Tuftelin-interacting 11	1.98514
Cc03_g05030	GSCOC_T00026240001	Cellulose synthase G1	1.98381
Cc03_g02730	GSCOC_T00025940001	Uncharacterized protein	1.98202
Cc05_g12850	GSCOC_T00021135001	Calcium-binding PBP1	1.98099
Cc02_g21400	GSCOC_T00014781001	Metacaspase-1	1.97796
Cc03_g12700	GSCOC_T00015172001	disease resistance RGA3	1.97339
Cc08_g05020	GSCOC_T00042457001	Uncharacterized protein	1.97324
Cc04_g12890	GSCOC_T00003266001	UDP-glycosyltransferase 90A1	1.973
Cc07_g12640	GSCOC_T00036848001	Uncharacterized protein	1.97223
Cc00_g09730	GSCOC_T00013505001	disease resistance RGA4	1.97035
Cc01_g01450	GSCOC_T00037907001	UDP-glycosyltransferase 74F2	1.97012
Cc06_g14180	GSCOC_T00041290001	HD domain-containing 2	1.96875
Cc08_g03720	GSCOC_T00034159001	Disease resistance RPM1	1.96844
Cc11_g15190	GSCOC_T00038024001	Probable nucleoredoxin 1	1.96779
Cc00_g15660	GSCOC_T00008806001	HEADING DATE 3A	1.96726
Cc10_g15580	GSCOC_T00033745001	Uncharacterized protein	1.96718
Cc10_g15450	GSCOC_T00033725001	Uncharacterized protein	1.96557
Cc10_g04960	GSCOC_T00034869001	Quinone oxidoreductase PIG3	1.96524
Cc02_g24320	GSCOC_T00002339001	Flavin-containing monooxygenase FMO GS-OX5	1.96318
Cc08_g12450	GSCOC_T00030480001	Uncharacterized protein	1.96194
Cc07_g10120	GSCOC_T00037157001	Bifunctional epoxide hydrolase 2	1.9578
Cc00_g02090	GSCOC_T00001844001	Disease resistance RFL1	1.95736
Cc09_g08740	GSCOC_T00020853001	Auxin response factor 6	1.95378
Cc02_g38780	GSCOC_T00027812001	BAG family molecular chaperone regulator 6	1.95284
Cc08_g05580	GSCOC_T00024337001	B3 domain-containing Os04g0386900	1.95032
Cc00_g01750	GSCOC_T00002840001	Uncharacterized protein	1.94889
Cc08_g04500	GSCOC_T00015639001	Disease resistance RPM1	1.94776
Cc08_g06360	GSCOC_T00040940001	Uncharacterized protein	1.94616
Cc07_g19210	GSCOC_T00018623001	Indole-3-acetic acid-induced ARG7	1.94397
Cc05_g00390	GSCOC_T00017072001	DETOXIFICATION 41	1.94313
Cc01_g05000	GSCOC_T00028577001	Myb family transcription factor At1g14600	1.93661
Cc04_g01340	GSCOC_T00021779001	Germin subfamily 3 member 3	1.93631
Cc00_g08550	GSCOC_T00005640001	MDIS1-interacting receptor like kinase 2	1.9355
Cc06_g14090	GSCOC_T00041302001	Auxin-induced 5NG4	1.93461
Cc02_g14900	GSCOC_T00013916001	Endoribonuclease Dicer homolog 2	1.93447
Cc05_g11510	GSCOC_T00021307001	Homogentisate	1.93379
Cc08_g00220	GSCOC_T00005578001	Uncharacterized protein	1.93294
Cc08_g13900	GSCOC_T00030290001	3-ketoacyl- synthase 4	1.93184
Cc08_g14870	GSCOC_T00035398001	Short-chain dehydrogenase TIC chloroplastic	1.93148
Cc02_g24010	GSCOC_T00015108001	Uncharacterized protein	1.92935
Cc00_g26740	GSCOC_T00003170001	UDP-glycosyltransferase 88A1	1.92853
Cc11_g05950	GSCOC_T00020572001	Ankyrin repeat-containing ITN1	1.92705
Cc00_g33020	GSCOC_T00002366001	Disease resistance RPM1	1.92189
Cc01_g02350	GSCOC_T00009719001	disease resistance RGA3	1.92112
Cc01_g11420	GSCOC_T00024271001	2-methylacyl- mitochondrial	1.92089
Cc02_g31320	GSCOC_T00027584001	Putative ribosomal protein S5-alanine N-acetyltransferase	1.91927
Cc08_g01760	GSCOC_T00038338001	invertase inhibitor	1.91868
Cc00_g23980	GSCOC_T00010601001	Pentatricopeptide repeat-containing mitochondrial	1.91829
Cc01_g03890	GSCOC_T00040898001	Uncharacterized protein	1.91827
Cc01_g11740	GSCOC_T00028084001	NRT1 PTR FAMILY	1.9107
Cc07_g19850	GSCOC_T00033883001	Bifunctional monodehydroascorbate reductase and carbonic anhydrase nectarin-3	1.90931
Cc00_g35890	GSCOC_T00005696001	Polyphenol oxidase chloroplastic	1.9082
Cc04_g11330	GSCOC_T00037304001	Receptor-like serine threonine- kinase NCRK	1.90806
Cc00_g19990	GSCOC_T00001938001	disease resistance RGA4	1.90637
Cc04_g05860	GSCOC_T00022355001	Ethylene-responsive transcription factor ERF114	1.90629
Cc02_g14580	GSCOC_T00013871001	GDSL esterase lipase At1g28580	1.9053
Cc03_g12840	GSCOC_T00015143001	disease resistance RGA4	1.90489
Cc07_g09690	GSCOC_T00037208001	Laccase-11	1.90169
Cc00_g18840	GSCOC_T00002533001	Hippocampus abundant transcript 1	1.89741
Cc00_g16010	GSCOC_T00009613001	disease resistance RPP13 1	1.89671
Cc04_g16930	GSCOC_T00035813001	Transcription factor bHLH121	1.89267
Cc09_g03480	GSCOC_T00017544001	Auxin efflux carrier component 5	1.89243
Cc01_g00520	GSCOC_T00011031001	disease resistance RGA3	1.8919
Cc01_g02610	GSCOC_T00009674001	Cytochrome P450 71D10	1.88996
Cc00_g24830	GSCOC_T00002362001	Disease resistance RGA2	1.88707
Cc02_g01320	GSCOC_T00019952001	Uncharacterized protein	1.88703
Cc05_g00830	GSCOC_T00013176001	Auxin transporter 2	1.87831
Cc01_g10080	GSCOC_T00024088001	Lysosomal Pro-X carboxypeptidase	1.87624
Cc00_g12020	GSCOC_T00000028001	Uncharacterized protein	1.87556
Cc00_g00970	GSCOC_T00041160001	Germin subfamily 1 member 7	1.8745
Cc07_g09400	GSCOC_T00037248001	Uncharacterized protein	1.87207
Cc00_g34520	GSCOC_T00012632001	Benzyl alcohol O-benzoyltransferase	1.87143
Cc02_g21620	GSCOC_T00014806001	Uncharacterized protein	1.87082
Cc07_g18920	GSCOC_T00018667001	Pentatricopeptide repeat-containing At1g62590	1.87054
Cc01_g13330	GSCOC_T00028298001	Uncharacterized protein	1.8696
Cc04_g09590	GSCOC_T00022851001	Omega-hydroxypalmitate O-feruloyl transferase	1.86942
Cc03_g06270	GSCOC_T00026417001	Plasmodesmata-located 2	1.86918
Cc06_g16130	GSCOC_T00030734001	Myb family transcription factor APL	1.86898
Cc08_g16730	GSCOC_T00035644001	Uncharacterized protein	1.86884
Cc01_g10280	GSCOC_T00024113001	Superoxide dismutas	1.86883
Cc02_g09900	GSCOC_T00029594001	Uncharacterized protein	1.8675
Cc01_g03720	GSCOC_T00033054001	Auxin-binding T85	1.86291
Cc10_g10350	GSCOC_T00031425001	Wall-associated receptor kinase 5	1.86164
Cc06_g20560	GSCOC_T00022999001	Uncharacterized protein	1.85556
Cc10_g09090	GSCOC_T00034298001	MDIS1-interacting receptor like kinase 2	1.85549
Cc08_g07980	GSCOC_T00007314001	Uncharacterized protein	1.8546
Cc04_g13760	GSCOC_T00035881001	Probable serine threonine- kinase CST	1.85325
Cc07_g04890	GSCOC_T00039750001	Uncharacterized protein	1.85148
Cc02_g19580	GSCOC_T00014526001	Zinc finger SWIM domain-containing 7	1.85137
Cc08_g07870	GSCOC_T00011882001	B3 domain-containing Os03g0622100	1.84999
Cc01_g06910	GSCOC_T00030100001	Probable disease resistance At5g63020	1.84851
Cc00_g25790	GSCOC_T00000762001	Cell division control 48 homolog B	1.84531
Cc04_g13770	GSCOC_T00035883001	Probable serine threonine- kinase CST	1.8441
Cc11_g11330	GSCOC_T00032460001	chloroplastic	1.84402
Cc05_g16340	GSCOC_T00038574001	Uncharacterized protein	1.84323
Cc00_g02800	GSCOC_T00009759001	Agamous-like MADS-box AGL8 homolog	1.83869
Cc06_g18560	GSCOC_T00040477001	Pentatricopeptide repeat-containing chloroplastic	1.83731
Cc11_g01870	GSCOC_T00019498001	Acyl- thioesterase 1 homolog 1	1.83613
Cc02_g18030	GSCOC_T00014336001	Non-symbiotic hemoglobin 1	1.83567
Cc00_g07950	GSCOC_T00009227001	Alcohol dehydrogenase-like 6	1.83539
Cc09_g09980	GSCOC_T00041104001	Bidirectional sugar transporter SWEET2a	1.83394
Cc07_g00190	GSCOC_T00019083001	Pectate lyase	1.83173
Cc08_g16340	GSCOC_T00035591001	Cellulose synthase G3	1.82822
Cc08_g09920	GSCOC_T00026947001	Amino acid permease 8	1.8282
Cc00_g33450	GSCOC_T00007482001	Uncharacterized protein	1.82546
Cc01_g12200	GSCOC_T00028147001	Licodione synthase	1.82187
Cc00_g27110	GSCOC_T00012787001	Uncharacterized protein	1.82053
Cc11_g11260	GSCOC_T00032469001	Uncharacterized protein	1.81956
Cc02_g08120	GSCOC_T00029843001	Bifunctional uridylyltransferase uridylyl-removing enzyme	1.81865
Cc02_g02980	GSCOC_T00020168001	late blight resistance homolog R1B-12	1.81784
Cc02_g37540	GSCOC_T00027976001	(+)-neomenthol dehydrogenase	1.81632
Cc00_g36030	GSCOC_T00011613001	Disease resistance RPM1	1.81586
Cc01_g00610	GSCOC_T00011045001	disease resistance RGA4	1.81414
Cc02_g17250	GSCOC_T00014234001	Bifunctional phosphatase chloroplastic	1.80926
Cc06_g22850	GSCOC_T00040660001	Short-chain type dehydrogenase reductase	1.80899
Cc06_g15110	GSCOC_T00030879001	Monodehydroascorbate reductase peroxisomal	1.80678
Cc04_g10200	GSCOC_T00042562001	Vinorine synthase	1.80233
Cc06_g17790	GSCOC_T00040370001	Zeatin O-glucosyltransferase	1.80208
Cc02_g17380	GSCOC_T00014250001	Isoflavone reductase homolog	1.80142
Cc00_g23580	GSCOC_T00010323001	Isoflavone reductase homolog A622	1.79967
Cc08_g15690	GSCOC_T00035509001	Ethylene-responsive transcription factor CRF2	1.79917
Cc02_g05640	GSCOC_T00039077001	Peroxidase 4	1.79679
Cc11_g14490	GSCOC_T00032052001	Potassium transporter 6	1.7958
Cc09_g06960	GSCOC_T00036341001	Theobromine synthase 2	1.79576
Cc08_g01840	GSCOC_T00008796001	DNA damage-repair toleration DRT100	1.79393
Cc11_g06460	GSCOC_T00020659001	Cation H(+) antiporter 20	1.79039
Cc10_g04510	GSCOC_T00034925001	Probable feruloyl esterase A	1.78864
Cc01_g19760	GSCOC_T00016015001	Calcium permeable stress-gated cation channel 1	1.78824
Cc04_g02360	GSCOC_T00021907001	Inositol oxygenase 1	1.78724
Cc01_g14170	GSCOC_T00028412001	Vacuolar cation proton exchanger 3	1.78474
Cc02_g14560	GSCOC_T00013869001	GDSL esterase lipase At1g28590	1.78411
Cc02_g12790	GSCOC_T00029236001	S-linalool synthase	1.78353
Cc07_g09380	GSCOC_T00037250001	Proline-rich receptor kinase PERK5	1.78236
Cc07_g05790	GSCOC_T00039860001	Peptidyl-prolyl cis-trans isomerase CYP40	1.78223
Cc06_g21250	GSCOC_T00018121001	Uncharacterized protein	1.78007
Cc02_g12590	GSCOC_T00029264001	Beta-galactosidase 6	1.77977
Cc01_g13920	GSCOC_T00028374001	Uncharacterized protein	1.77826
Cc10_g05740	GSCOC_T00034772001	Sigma factor regulation	1.77804
Cc02_g06870	GSCOC_T00039240001	BAHD acyltransferase DCR	1.77766
Cc10_g05090	GSCOC_T00034855001	Serine carboxypeptidase-like 18	1.77735
Cc00_g29640	GSCOC_T00001111001	Disease resistance RPM1	1.77691
Cc01_g14910	GSCOC_T00028512001	Cation H(+) antiporter 15	1.77572
Cc02_g25760	GSCOC_T00028703001	Sister chromatid cohesion DCC1	1.77565
Cc07_g19600	GSCOC_T00018543001	Xanthine dehydrogenase 1	1.77537
Cc11_g03140	GSCOC_T00025462001	UDP-glycosyltransferase 76E1	1.77535
Cc01_g11810	GSCOC_T00028092001	Choline chloroplastic	1.77481
Cc10_g01240	GSCOC_T00024594001	6-hydroxynicotinate 3-monooxygenase	1.77359
Cc00_g09170	GSCOC_T00012168001	Uncharacterized protein	1.77225
Cc00_g05700	GSCOC_T00006256001	Dihydropyrimidinase	1.77082
Cc10_g08480	GSCOC_T00034383001	UDP-glycosyltransferase 91C1	1.77046
Cc02_g26920	GSCOC_T00025001001	Uncharacterized protein	1.7697
Cc02_g21880	GSCOC_T00014838001	Uncharacterized protein	1.76883
Cc08_g05680	GSCOC_T00024355001	Adenylyltransferase and sulfurtransferase MOCS3-1	1.76863
Cc11_g01950	GSCOC_T00033048001	Probable disease resistance RPP8 2	1.76754
Cc02_g36130	GSCOC_T00006317001	Auxin-induced PCNT115	1.76292
Cc10_g14590	GSCOC_T00033600001	Vacuolar iron transporter homolog 4	1.76258
Cc09_g03240	GSCOC_T00017575001	F-box At2g02240	1.76226
Cc08_g04410	GSCOC_T00034266001	Uncharacterized protein	1.76068
Cc02_g34450	GSCOC_T00000690001	Pentatricopeptide repeat-containing mitochondrial	1.76063
Cc08_g09890	GSCOC_T00026943001	Histidine-containing phosphotransfer 4	1.76033
Cc06_g15260	GSCOC_T00030856001	Uncharacterized protein	1.76025
Cc06_g16630	GSCOC_T00030657001	Probable glucuronoxylan glucuronosyltransferase F8H	1.75988
Cc07_g16210	GSCOC_T00037593001	Monothiol glutaredoxin-S2	1.7591
Cc07_g15910	GSCOC_T00037634001	Cytochrome P450 71A1	1.75701
Cc10_g07540	GSCOC_T00034509001	Probable glucan	1.7566
Cc06_g16860	GSCOC_T00004140001	Probable galactinol--sucrose galactosyltransferase 2	1.75547
Cc07_g00050	GSCOC_T00019067001	GDSL esterase lipase At5g14450	1.75542
Cc02_g18150	GSCOC_T00014351001	Myosin heavy chain kinase B	1.755
Cc01_g00370	GSCOC_T00013679001	Benzyl alcohol O-benzoyltransferase	1.75489
Cc06_g01390	GSCOC_T00023357001	Uncharacterized protein	1.7539
Cc10_g10510	GSCOC_T00035989001	Serine threonine- kinase mph1	1.75327
Cc03_g06290	GSCOC_T00026419001	Mitochondrial import receptor subunit TOM9-2	1.75299
Cc04_g12370	GSCOC_T00005293001	deoxyribonuclease TATDN1	1.75278
Cc01_g04080	GSCOC_T00039275001	Long-chain-fatty-acid--AMP ligase 28	1.75261
Cc01_g15030	GSCOC_T00016613001	Alanine--glyoxylate aminotransferase 2 homolog mitochondrial	1.75137
Cc02_g19360	GSCOC_T00014502001	LYR motif-containing At3g19508	1.75103
Cc10_g14810	GSCOC_T00033629001	Auxin-induced 5NG4	1.74997
Cc00_g18940	GSCOC_T00008227001	disease resistance RGA3	1.7474
Cc08_g03480	GSCOC_T00034128001	Uncharacterized protein	1.74627
Cc04_g12660	GSCOC_T00012781001	Disease resistance RPM1	1.74294
Cc04_g16960	GSCOC_T00035817001	STRICTOSIDINE SYNTHASE-LIKE 12	1.73875
Cc07_g17270	GSCOC_T00037453001	late blight resistance homolog R1A-6	1.7381
Cc00_g17300	GSCOC_T00001366001	Cysteine-rich receptor kinase 10	1.73795
Cc04_g11740	GSCOC_T00037379001	Primary amine oxidase	1.73665
Cc03_g01590	GSCOC_T00025774001	GAMETE EXPRESSED 2	1.73488
Cc04_g15170	GSCOC_T00002602001	Pentatricopeptide repeat-containing At5g48910	1.73282
Cc04_g14560	GSCOC_T00040705001	L-type lectin-domain containing receptor kinase	1.73199
Cc01_g12950	GSCOC_T00028252001	SUPPRESSOR OF GENE SILENCING 3 homolog	1.73147
Cc08_g11200	GSCOC_T00027115001	Serine threonine- kinase SAPK3	1.73093
Cc00_g30510	GSCOC_T00012747001	disease resistance RGA3	1.73085
Cc07_g05880	GSCOC_T00039874001	Patatin-2-Kuras 1	1.72922
Cc02_g07150	GSCOC_T00009480001	Uncharacterized protein	1.72908
Cc03_g05980	GSCOC_T00026372001	Probable fatty acid methyltransferase	1.72727
Cc02_g12140	GSCOC_T00029328001	Calcium-binding PBP1	1.72691
Cc04_g11920	GSCOC_T00037404001	LEAF RUST 10 DISEASE-RESISTANCE LOCUS RECEPTOR-LIKE PROTEIN KINASE-like	1.72676
Cc07_g06270	GSCOC_T00039926001	Probable iron ascorbate oxidoreductase DDB_G0283291	1.72659
Cc07_g01070	GSCOC_T00019192001	Serine threonine- kinase PBS1	1.7251
Cc03_g15460	GSCOC_T00026827001	homolog subfamily B member 6-A	1.72474
Cc02_g14600	GSCOC_T00013876001	Uncharacterized protein	1.72393
Cc06_g07980	GSCOC_T00031190001	Actin-depolymerizing factor	1.72372
Cc11_g01170	GSCOC_T00019617001	Pentatricopeptide repeat-containing At1g05600	1.72358
Cc01_g03700	GSCOC_T00033062001	Benzyl alcohol O-benzoyltransferase	1.72356
Cc03_g12930	GSCOC_T00030635001	Uncharacterized protein	1.72227
Cc03_g09840	GSCOC_T00030974001	late blight resistance homolog R1A-3	1.71992
Cc04_g01500	GSCOC_T00021804001	Solute carrier family 25 member 44	1.7194
Cc08_g16840	GSCOC_T00035659001	Endoglucanase 1	1.718
Cc10_g05130	GSCOC_T00034851001	Uncharacterized protein	1.71644
Cc06_g07730	GSCOC_T00031223001	SRG1	1.71629
Cc08_g12470	GSCOC_T00030476001	Uncharacterized protein	1.71407
Cc02_g21420	GSCOC_T00014783001	Metacaspase-1	1.71045
Cc01_g18750	GSCOC_T00016160001	Ankyrin-3	1.7104
Cc04_g10280	GSCOC_T00042573001	Uncharacterized aarF domain-containing kinase 1	1.71007
Cc06_g22390	GSCOC_T00017202001	Uncharacterized protein	1.70964
Cc04_g17230	GSCOC_T00035861001	ABC transporter A family member 5	1.70671
Cc00_g26700	GSCOC_T00003035001	disease resistance RGA3	1.70604
Cc04_g15160	GSCOC_T00002601001	Pentatricopeptide repeat-containing At5g61400	1.7054
Cc10_g12830	GSCOC_T00032012001	Probable LRR receptor-like serine threonine- kinase At3g47570	1.70421
Cc00_g10740	GSCOC_T00009008001	NLP4	1.70131
Cc07_g08450	GSCOC_T00040218001	DETOXIFICATION 6	1.70062
Cc00_g25770	GSCOC_T00008868001	Uncharacterized protein	1.70048
Cc10_g10060	GSCOC_T00031461001	Exostosin-2	1.69941
Cc09_g00440	GSCOC_T00017950001	Uncharacterized protein	1.69902
Cc01_g07030	GSCOC_T00030122001	Uncharacterized protein	1.69884
Cc00_g13000	GSCOC_T00002078001	Uncharacterized protein	1.69861
Cc07_g06770	GSCOC_T00040001001	Uncharacterized protein ycf36	1.69823
Cc02_g31570	GSCOC_T00027534001	Polyubiquitin 4	1.69806
Cc08_g16780	GSCOC_T00035651001	Homeobox-leucine zipper ATHB-7	1.69549
Cc02_g20620	GSCOC_T00014678001	Oligopeptide transporter 4	1.69517
Cc08_g04380	GSCOC_T00034261001	Anaphase-promoting complex subunit cdc20	1.69491
Cc05_g07920	GSCOC_T00016796001	Uncharacterized protein	1.69488
Cc00_g09140	GSCOC_T00011959001	disease resistance RGA3	1.69445
Cc11_g05690	GSCOC_T00020534001	UDP-glycosyltransferase 83A1	1.69309
Cc02_g29800	GSCOC_T00038884001	Cytochrome c oxidase assembly COX15	1.6913
Cc01_g01100	GSCOC_T00037984001	UDP-glycosyltransferase 85A3	1.68495
Cc00_g28410	GSCOC_T00003307001	F-box LRR-repeat MAX2 homolog	1.68285
Cc00_g19650	GSCOC_T00004841001	disease resistance RGA3	1.68208
Cc07_g17010	GSCOC_T00037486001	Auxin-induced 5NG4	1.67958
Cc10_g11980	GSCOC_T00031880001	Chlorophyllide a chloroplastic	1.67428
Cc00_g34010	GSCOC_T00006265001	UDP-glucose flavonoid 3-O-glucosyltransferase 3	1.67388
Cc05_g01940	GSCOC_T00040844001	UDP-glucose flavonoid 3-O-glucosyltransferase 6	1.6722
Cc11_g11830	GSCOC_T00032393001	Probable 6-phosphogluconolactonase 1	1.67163
Cc05_g14260	GSCOC_T00038839001	EH domain-containing 1	1.66958
Cc02_g30610	GSCOC_T00023793001	GDP-mannose	1.66924
Cc07_g08560	GSCOC_T00040234001	Non-specific lipid-transfer 2	1.66869
Cc01_g20180	GSCOC_T00015963001	PAX-interacting 1	1.66782
Cc11_g00870	GSCOC_T00019685001	Transport and Golgi organization 2 homolog	1.66685
Cc01_g16810	GSCOC_T00016397001	pentatricopeptide repeat-containing mitochondrial	1.66432
Cc00_g34610	GSCOC_T00013454001	Glyoxylate reductase	1.66268
Cc01_g03320	GSCOC_T00033129001	translation factor SUI1 homolog	1.66159
Cc10_g02660	GSCOC_T00024772001	Isoflavone reductase homolog P3	1.66134
Cc10_g02380	GSCOC_T00024739001	Cytokinin dehydrogenase 5	1.65666
Cc02_g25960	GSCOC_T00028673001	Uncharacterized protein	1.65647
Cc03_g09800	GSCOC_T00030970001	Probable aldo-keto reductase 2	1.65641
Cc02_g36050	GSCOC_T00042756001	membrane-bound O-acyltransferase	1.6553
Cc08_g02020	GSCOC_T00037660001	Disease resistance RPM1	1.65407
Cc02_g25940	GSCOC_T00028678001	Uncharacterized protein	1.65386
Cc11_g07840	GSCOC_T00032958001	Probable LRR receptor-like serine threonine- kinase At3g47570	1.65137
Cc05_g12510	GSCOC_T00021183001	NAC domain-containing 18	1.65065
Cc02_g33970	GSCOC_T00008650001	Uncharacterized protein	1.64957
Cc04_g10400	GSCOC_T00042588001	Cucumisin	1.64935
Cc07_g07380	GSCOC_T00040087001	AP2-like ethylene-responsive transcription factor ANT	1.64934
Cc05_g01680	GSCOC_T00015740001	SAP BP-73	1.64822
Cc04_g15680	GSCOC_T00042344001	Abscisic acid 8 -hydroxylase 1	1.64721
Cc04_g06180	GSCOC_T00022400001	60S ribosomal L19-2	1.64648
Cc11_g10790	GSCOC_T00032529001	Nudix hydrolase 1	1.64357
Cc06_g08480	GSCOC_T00031126001	Alpha-amylase isozyme 3E	1.64025
Cc02_g20490	GSCOC_T00014663001	Peptide methionine sulfoxide reductase chloroplastic	1.64005
Cc03_g12290	GSCOC_T00015239001	Uncharacterized protein	1.63861
Cc04_g12100	GSCOC_T00005254001	DUF21 domain-containing At4g33700	1.63663
Cc04_g14060	GSCOC_T00035930001	Probable disease resistance RPP8 2	1.63636
Cc02_g05830	GSCOC_T00039103001	Cation H(+) antiporter 3	1.63511
Cc00_g19580	GSCOC_T00006064001	Alpha-glucosidase 2	1.63323
Cc11_g02600	GSCOC_T00025562001	TIMELESS-interacting	1.63116
Cc11_g11870	GSCOC_T00032387001	ATP-dependent RNA helicase DHX33	1.63061
Cc10_g09760	GSCOC_T00031503001	NRT1 PTR FAMILY	1.63046
Cc00_g02180	GSCOC_T00007909001	Vacuolar-sorting receptor 6	1.62997
Cc10_g05110	GSCOC_T00034853001	Serine carboxypeptidase-like 18	1.62853
Cc05_g16140	GSCOC_T00038601001	Mitotic spindle assembly checkpoint MAD2B	1.62826
Cc04_g11200	GSCOC_T00037284001	Cytochrome P450 71A1	1.62194
Cc01_g02250	GSCOC_T00019321001	disease resistance RGA4	1.62173
Cc04_g05650	GSCOC_T00022328001	Uncharacterized protein C1450.15	1.61906
Cc00_g00420	GSCOC_T00036127001	Arginine decarboxylase	1.61742
Cc00_g10150	GSCOC_T00000010001	late blight resistance homolog R1B-12	1.61639
Cc06_g17780	GSCOC_T00040367001	Zeatin O-glucosyltransferase	1.6121
Cc11_g06540	GSCOC_T00020671001	Receptor 12	1.61039
Cc05_g14120	GSCOC_T00038859001	Uncharacterized protein	1.6067
Cc11_g08760	GSCOC_T00032829001	late blight resistance homolog R1B-12	1.60339
Cc06_g15930	GSCOC_T00030756001	Flavonol 3-sulfotransferase	1.60329
Cc10_g04370	GSCOC_T00034943001	Probable carboxylesterase 2	1.60206
Cc05_g09830	GSCOC_T00021533001	Telomere repeat-binding factor 3	1.60136
Cc07_g13100	GSCOC_T00036793001	Ethylene-responsive transcription factor 1B	1.60116
Cc06_g15040	GSCOC_T00030888001	Purine permease 1	1.60077
Cc02_g28570	GSCOC_T00009443001	Probable pyridoxal 5 -phosphate synthase subunit PDX1	1.5998
Cc06_g17610	GSCOC_T00040343001	RRP12	1.59977
Cc11_g01060	GSCOC_T00019650001	Major allergen Pru ar 1	1.59719
Cc02_g33050	GSCOC_T00016746001	GDSL esterase lipase 5	1.59466
Cc02_g38200	GSCOC_T00027894001	Cysteine chloroplastic chromoplastic	1.59323
Cc02_g13680	GSCOC_T00029115001	Ethylene-responsive transcription factor 12	1.59318
Cc03_g10740	GSCOC_T00042000001	Probable DNA replication complex GINS PSF3	1.59306
Cc04_g08120	GSCOC_T00022662001	Tropinone reductase homolog	1.59015
Cc03_g03910	GSCOC_T00026092001	Uncharacterized protein	1.5895
Cc09_g01880	GSCOC_T00017750001	Uncharacterized protein	1.58919
Cc00_g24390	GSCOC_T00002089001	Phospholipase A1- chloroplastic	1.58878
Cc11_g11290	GSCOC_T00032465001	Ocs element-binding factor 1	1.58676
Cc05_g01540	GSCOC_T00018247001	ATP-dependent zinc metalloprotease FTSH chloroplastic	1.58628
Cc07_g07390	GSCOC_T00040088001	AP2-like ethylene-responsive transcription factor ANT	1.58618
Cc01_g06320	GSCOC_T00029997001	Methyltransferase 22	1.58527
Cc00_g35730	GSCOC_T00010027001	Small subunit processome component 20 homolog	1.58491
Cc01_g10270	GSCOC_T00024112001	Uncharacterized protein	1.58459
Cc01_g19080	GSCOC_T00016105001	Chlorophyllase-1	1.58404
Cc06_g09830	GSCOC_T00041862001	F-box CPR1	1.58399
Cc09_g10500	GSCOC_T00041037001	Lysine histidine transporter-like 7	1.58286
Cc04_g14540	GSCOC_T00040698001	L-type lectin-domain containing receptor kinase	1.58205
Cc02_g38140	GSCOC_T00027902001	Ascorbate chloroplastic	1.58007
Cc00_g27650	GSCOC_T00012603001	disease resistance RPP13 1	1.57598
Cc01_g00570	GSCOC_T00011037001	disease resistance RGA3	1.57431
Cc04_g16070	GSCOC_T00042398001	Polynucleotide 5 -hydroxyl-kinase NOL9	1.57292
Cc00_g05370	GSCOC_T00000534001	E3 ubiquitin- ligase BIG BROTHER	1.57286
Cc11_g16950	GSCOC_T00038248001	Uncharacterized protein	1.57108
Cc11_g14760	GSCOC_T00032013001	Probable nucleoredoxin 1	1.57089
Cc07_g07660	GSCOC_T00040120001	Uncharacterized protein	1.57008
Cc11_g15010	GSCOC_T00001030001	Ethylene-responsive transcription factor ERF113	1.57006
Cc02_g38520	GSCOC_T00027853001	late blight resistance homolog R1A-3	1.56825
Cc00_g12620	GSCOC_T00010989001	UPF0415 C7orf25 homolog	1.56819
Cc07_g16690	GSCOC_T00037530001	Uncharacterized protein	1.5676
Cc00_g29600	GSCOC_T00002220001	Cellulose synthase B6	1.56281
Cc11_g08510	GSCOC_T00032863001	10 kDa mitochondrial	1.55938
Cc02_g00060	GSCOC_T00019780001	Uncharacterized protein	1.55934
Cc10_g06050	GSCOC_T00034718001	Transcription factor TGA7	1.55816
Cc05_g03460	GSCOC_T00033561001	F-box LRR-repeat At4g14103	1.55791
Cc11_g16260	GSCOC_T00038162001	Very-long-chain 3-oxoacyl- reductase	1.55766
Cc06_g10530	GSCOC_T00041766001	Hexokinase-2	1.55691
Cc02_g01670	GSCOC_T00019995001	Serine threonine- kinase chloroplastic	1.55658
Cc06_g02030	GSCOC_T00023443001	Probable glutathione S-transferase	1.55575
Cc11_g01040	GSCOC_T00019652001	Probable RNA helicase SDE3	1.55509
Cc00_g27170	GSCOC_T00000230001	Calcium uniporter mitochondrial	1.55484
Cc02_g29730	GSCOC_T00010184001	Histone	1.55364
Cc08_g05390	GSCOC_T00024301001	nuclease HARBI1	1.55237
Cc05_g03180	GSCOC_T00033512001	Plant UBX domain-containing 5	1.54544
Cc00_g28860	GSCOC_T00003284001	60S ribosomal L17-2	1.54365
Cc04_g12630	GSCOC_T00012776001	Disease susceptibility LOV1	1.5424
Cc08_g03220	GSCOC_T00037839001	Uncharacterized protein	1.54163
Cc04_g14610	GSCOC_T00040714001	L-type lectin-domain containing receptor kinase	1.54083
Cc01_g17310	GSCOC_T00016339001	Probable pectate lyase 8	1.54021
Cc04_g09340	GSCOC_T00022817001	Potassium channel SKOR	1.53726
Cc01_g06280	GSCOC_T00029992001	Lichenase	1.53647
Cc05_g16610	GSCOC_T00038538001	Uncharacterized protein	1.53396
Cc03_g01990	GSCOC_T00025834001	Alanine--tRNA ligase	1.53381
Cc07_g16660	GSCOC_T00037535001	Uncharacterized protein	1.53307
Cc06_g11220	GSCOC_T00041684001	K(+) efflux antiporter 6	1.52968
Cc00_g11190	GSCOC_T00009795001	late blight resistance homolog R1B-16	1.52913
Cc05_g04690	GSCOC_T00003013001	Disease resistance RFL1	1.52788
Cc05_g02110	GSCOC_T00018402001	Ribosomal RNA small subunit methyltransferase NEP1	1.52694
Cc00_g31040	GSCOC_T00006532001	Probable disease resistance RPP8 4	1.52603
Cc02_g21280	GSCOC_T00014765001	ABC transporter G family member 11	1.5223
Cc05_g12730	GSCOC_T00021152001	Cyclic nucleotide-gated ion channel 4	1.52172
Cc08_g12110	GSCOC_T00030526001	Cytochrome P450 71D10	1.51928
Cc02_g17690	GSCOC_T00014291001	Organ-specific P4	1.51712
Cc04_g07020	GSCOC_T00022503001	Uncharacterized RING finger	1.51692
Cc01_g15370	GSCOC_T00016570001	Pathogenesis-related genes transcriptional activator PTI6	1.51662
Cc11_g01810	GSCOC_T00019509001	Pentatricopeptide repeat-containing mitochondrial	1.51597
Cc09_g04560	GSCOC_T00017411001	Endoglucanase 24	1.51519
Cc00_g29500	GSCOC_T00011319001	late blight resistance homolog R1B-13	1.51517
Cc02_g09330	GSCOC_T00029668001	Uncharacterized protein	1.51292
Cc01_g07920	GSCOC_T00015471001	late blight resistance homolog R1B-16	1.51227
Cc05_g07400	GSCOC_T00042268001	DNA excision repair ERCC-6-like 2	1.51137
Cc04_g04950	GSCOC_T00022234001	Zinc finger 3	1.51042
Cc04_g03540	GSCOC_T00022049001	Thionin 2	1.50787
Cc06_g09080	GSCOC_T00041968001	Heme-binding chloroplastic	1.50492
Cc00_g19510	GSCOC_T00007978001	disease resistance RGA3	1.50424
Cc02_g04090	GSCOC_T00020312001	Pentatricopeptide repeat-containing chloroplastic	1.50341
Cc00_g26030	GSCOC_T00004770001	Ribonucleases P MRP subunit POP1	1.50306
Cc01_g11880	GSCOC_T00028104001	Uncharacterized protein YKR070W	1.50305
Cc00_g07970	GSCOC_T00009230001	Alcohol dehydrogenase-like 6	1.49764
Cc09_g06150	GSCOC_T00033355001	Uncharacterized protein	1.4965
Cc00_g21520	GSCOC_T00008528001	UDP-glycosyltransferase 71B1	1.49501
Cc06_g18760	GSCOC_T00028904001	methyltransferase DDB_G0268948	1.49329
Cc00_g07980	GSCOC_T00009232001	Transcriptional repressor NF-X1	1.493
Cc11_g14710	GSCOC_T00032021001	Uncharacterized protein	1.49261
Cc08_g00260	GSCOC_T00005584001	Flotillin 1	1.49108
Cc02_g30040	GSCOC_T00038950001	calcium-transporting ATPase plasma membrane-type	1.49003
Cc00_g17660	GSCOC_T00007028001	Probable aldo-keto reductase 4	1.4842
Cc01_g18050	GSCOC_T00016250001	Long-chain-alcohol oxidase FAO2	1.48221
Cc02_g39110	GSCOC_T00027762001	Dihydroflavonol 4-reductase	1.48023
Cc02_g12980	GSCOC_T00029214001	Bifunctional epoxide hydrolase 2	1.47896
Cc10_g13140	GSCOC_T00035335001	Small RNA degrading nuclease 5	1.47877
Cc09_g03470	GSCOC_T00017545001	Auxin efflux carrier component 5	1.47829
Cc06_g18770	GSCOC_T00028905001	methyltransferase DDB_G0268948	1.47757
Cc03_g07120	GSCOC_T00026549001	ROOT HAIR DEFECTIVE 3 homolog 1	1.47747
Cc06_g04300	GSCOC_T00023744001	Transcription factor RAX2	1.47457
Cc04_g01850	GSCOC_T00021847001	Beta- insoluble isoenzyme CWINV1	1.4737
Cc00_g29820	GSCOC_T00013372001	Disease resistance RPM1	1.4717
Cc09_g00420	GSCOC_T00017952001	Oligopeptide transporter 3	1.47169
Cc02_g09310	GSCOC_T00029671001	homolog	1.47117
Cc07_g14100	GSCOC_T00036656001	Magnesium-dependent phosphatase 1	1.47106
Cc04_g02670	GSCOC_T00021943001	Uncharacterized protein	1.47099
Cc08_g06860	GSCOC_T00025231001	Uncharacterized protein	1.46928
Cc09_g04920	GSCOC_T00007061001	Pentatricopeptide repeat-containing mitochondrial	1.46876
Cc02_g13180	GSCOC_T00029189001	Uncharacterized protein	1.46858
Cc00_g11170	GSCOC_T00008684001	Uncharacterized protein	1.46857
Cc03_g10660	GSCOC_T00000379001	Vacuolar amino acid transporter 1	1.46796
Cc05_g12530	GSCOC_T00021179001	Peroxisomal membrane 2	1.46611
Cc06_g19580	GSCOC_T00029025001	UDP-glucose flavonoid 3-O-glucosyltransferase 6	1.46581
Cc05_g08090	GSCOC_T00016820001	Uncharacterized protein HI_0077	1.46558
Cc05_g10350	GSCOC_T00021458001	Gibberellin 2-beta-dioxygenase 3	1.46516
Cc02_g12990	GSCOC_T00029213001	NADPH:quinone oxidoreductase	1.46478
Cc08_g13890	GSCOC_T00030291001	SPX domain-containing membrane At4g22990	1.46411
Cc01_g10450	GSCOC_T00024141001	Serine carboxypeptidase-like 48	1.45998
Cc06_g04160	GSCOC_T00023725001	Uncharacterized protein	1.45854
Cc00_g31400	GSCOC_T00013472001	Disease resistance RPM1	1.45823
Cc07_g04840	GSCOC_T00039745001	S-adenosylmethionine decarboxylase proenzyme	1.45732
Cc00_g31050	GSCOC_T00007711001	Miraculin	1.45549
Cc00_g19490	GSCOC_T00003022001	Uncharacterized protein	1.45475
Cc02_g05750	GSCOC_T00039091001	sodium-coupled neutral amino acid transporter 7	1.45415
Cc11_g10840	GSCOC_T00032523001	Uncharacterized protein	1.45403
Cc02_g20060	GSCOC_T00014607001	Uncharacterized protein	1.45316
Cc00_g00590	GSCOC_T00036153001	Probable receptor kinase At5g39020	1.45191
Cc02_g07080	GSCOC_T00039267001	Uncharacterized protein	1.44973
Cc10_g16230	GSCOC_T00033840001	Uncharacterized protein ycf45	1.44918
Cc08_g12510	GSCOC_T00030472001	Aspartic ase nepenthesin-1	1.44791
Cc00_g18750	GSCOC_T00008462001	Receptor-like serine threonine- kinase SD1-7	1.44777
Cc11_g05280	GSCOC_T00020472001	Sodium hydrogen exchanger 7	1.44774
Cc05_g05280	GSCOC_T00035095001	late blight resistance homolog R1A-6	1.44751
Cc02_g33390	GSCOC_T00015368001	Mannosylglyco endo-beta-mannosidase	1.44716
Cc00_g02860	GSCOC_T00004304001	Probable LRR receptor-like serine threonine- kinase At1g53430	1.44404
Cc00_g17350	GSCOC_T00004259001	LRR receptor-like serine threonine- kinase FLS2	1.44325
Cc07_g03470	GSCOC_T00039578001	Cyclic dof factor 2	1.44323
Cc07_g20360	GSCOC_T00015681001	Reticuline oxidase	1.44321
Cc06_g02020	GSCOC_T00023442001	Universal stress A	1.44212
Cc11_g09520	GSCOC_T00032709001	Uncharacterized protein	1.44174
Cc07_g03670	GSCOC_T00039611001	Ethylene-responsive transcription factor RAP2-11	1.44097
Cc00_g25810	GSCOC_T00009825001	Uncharacterized protein	1.43805
Cc00_g27080	GSCOC_T00004251001	Uncharacterized protein	1.4378
Cc06_g12400	GSCOC_T00041541001	Inter-alpha-trypsin inhibitor heavy chain H3	1.43378
Cc03_g15450	GSCOC_T00026825001	Disease resistance RGA2	1.43322
Cc08_g01120	GSCOC_T00038428001	Uncharacterized protein	1.43288
Cc01_g00430	GSCOC_T00011017001	disease resistance RGA3	1.4324
Cc03_g07200	GSCOC_T00026562001	Disease resistance RPP8	1.43213
Cc10_g07350	GSCOC_T00034534001	Uncharacterized TPR repeat-containing At1g05150	1.43188
Cc11_g04340	GSCOC_T00001355001	Uncharacterized protein	1.43177
Cc09_g07260	GSCOC_T00036288001	Vacuolar sorting-associated 2 homolog 2	1.43118
Cc08_g02250	GSCOC_T00037688001	Disease resistance RPM1	1.43106
Cc07_g02190	GSCOC_T00039402001	L-aspartate oxidase	1.43055
Cc11_g04450	GSCOC_T00004790001	DEAD-box ATP-dependent RNA helicase 35	1.4302
Cc01_g20380	GSCOC_T00015940001	Glutaredoxin-C11	1.42976
Cc06_g20270	GSCOC_T00022949001	Auxin-induced 5NG4	1.42975
Cc05_g00110	GSCOC_T00017031001	Uncharacterized protein	1.42811
Cc11_g08650	GSCOC_T00032845001	Serine carboxypeptidase-like 50	1.42783
Cc01_g18490	GSCOC_T00016199001	1-aminocyclopropane-1-carboxylate oxidase homolog 1	1.42673
Cc04_g03160	GSCOC_T00022008001	Proline-rich receptor kinase PERK15	1.42669
Cc03_g09470	GSCOC_T00030925001	Uncharacterized protein	1.42587
Cc00_g07030	GSCOC_T00003186001	Pentatricopeptide repeat-containing At5g62370	1.42543
Cc00_g10220	GSCOC_T00003162001	Uncharacterized protein	1.42523
Cc10_g02800	GSCOC_T00024789001	homolog subfamily C member 2	1.42506
Cc03_g00600	GSCOC_T00025645001	Cell wall vacuolar inhibitor of fructosidase 1	1.42438
Cc05_g06900	GSCOC_T00042206001	2	1.42434
Cc02_g03080	GSCOC_T00020180001	DNA mismatch repair MSH3	1.42431
Cc02_g21180	GSCOC_T00014755001	DNA helicase MCM9	1.42169
Cc08_g13370	GSCOC_T00030352001	Uncharacterized protein At4g22758	1.42087
Cc06_g01960	GSCOC_T00023436001	kDa class I heat shock	1.41953
Cc09_g03570	GSCOC_T00017531001	Pentatricopeptide repeat-containing mitochondrial	1.41873
Cc06_g18850	GSCOC_T00028920001	pentatricopeptide repeat-containing mitochondrial	1.41812
Cc00_g05720	GSCOC_T00006259001	Dihydropyrimidinase	1.41744
Cc01_g08760	GSCOC_T00023911001	Bifunctional nitrilase nitrile hydratase NIT4B	1.41657
Cc00_g35070	GSCOC_T00008596001	Probable disease resistance RPP8 2	1.41632
Cc04_g06310	GSCOC_T00022417001	Uncharacterized protein	1.41519
Cc04_g12750	GSCOC_T00008263001	(RS)-norcoclaurine 6-O-methyltransferase	1.4131
Cc02_g29340	GSCOC_T00018351001	amidase	1.41272
Cc00_g06160	GSCOC_T00010056001	Indole-3-acetaldehyde oxidase	1.41134
Cc02_g24290	GSCOC_T00002342001	Flavin-containing monooxygenase FMO GS-OX5	1.40941
Cc08_g05790	GSCOC_T00024369001	Upstream activation factor subunit UAF30	1.40679
Cc11_g05820	GSCOC_T00020553001	Purple acid phosphatase 3	1.40517
Cc02_g07230	GSCOC_T00029971001	Uncharacterized protein	1.40313
Cc02_g07530	GSCOC_T00029924001	Thaumatin	1.40308
Cc10_g12150	GSCOC_T00031906001	Kinesin-related 11	1.40171
Cc00_g34260	GSCOC_T00012941001	amidase	1.40016
Cc00_g06260	GSCOC_T00010080001	Shikimate O-hydroxycinnamoyltransferase	1.3992
Cc00_g25340	GSCOC_T00013705001	late blight resistance homolog R1A-6	1.39649
Cc00_g30930	GSCOC_T00013530001	Apoptosis inhibitor 5	1.39558
Cc03_g05220	GSCOC_T00026270001	1-aminocyclopropane-1-carboxylate oxidase homolog	1.39514
Cc06_g19070	GSCOC_T00028956001	Ribosomal RNA small subunit methyltransferase NEP1	1.39501
Cc06_g09680	GSCOC_T00041883001	Uncharacterized protein	1.39375
Cc01_g12930	GSCOC_T00028246001	Probable serine threonine- kinase PBL19	1.39342
Cc01_g07510	GSCOC_T00009389001	Late blight resistance R1-A	1.38988
Cc09_g05050	GSCOC_T00007077001	Cationic amino acid transporter 5	1.389
Cc01_g19180	GSCOC_T00016094001	CST complex subunit STN1	1.38688
Cc06_g09990	GSCOC_T00041843001	Peroxiredoxin-2B	1.38688
Cc07_g05580	GSCOC_T00039834001	Uncharacterized protein	1.38679
Cc07_g17230	GSCOC_T00037462001	Uncharacterized protein	1.38564
Cc00_g02130	GSCOC_T00001853001	disease resistance At4g10780	1.38529
Cc00_g13440	GSCOC_T00010137001	ATP synthase subunit mitochondrial	1.38438
Cc05_g15960	GSCOC_T00038621001	NAC domain-containing 21 22	1.38307
Cc07_g20520	GSCOC_T00015719001	Uncharacterized protein	1.38072
Cc01_g16550	GSCOC_T00016428001	Uncharacterized protein	1.37874
Cc09_g04150	GSCOC_T00017461001	tRNA-specific 2-thiouridylase	1.37813
Cc03_g01790	GSCOC_T00025805001	Translationally-controlled tumor homolog	1.37459
Cc06_g20910	GSCOC_T00015850001	Uncharacterized protein	1.37427
Cc09_g05560	GSCOC_T00033448001	Phenylalanine--tRNA chloroplastic mitochondrial	1.37317
Cc01_g17080	GSCOC_T00016365001	E3 ubiquitin- ligase PRT1	1.37307
Cc03_g04870	GSCOC_T00026218001	StAR-related lipid transfer mitochondrial	1.37259
Cc00_g27470	GSCOC_T00006230001	F-box kelch-repeat At3g23880	1.37217
Cc05_g06110	GSCOC_T00009865001	Beta-amylase	1.37214
Cc05_g14680	GSCOC_T00038791001	Peptide-N4-(N-acetyl-beta-glucosaminyl)asparagine amidase A	1.372
Cc03_g09480	GSCOC_T00030926001	Uncharacterized protein	1.37183
Cc05_g14670	GSCOC_T00038792001	Uncharacterized protein	1.37173
Cc02_g21360	GSCOC_T00014777001	UDP-glycosyltransferase 85A2	1.36661
Cc10_g09680	GSCOC_T00031513001	Uncharacterized protein	1.36594
Cc01_g04650	GSCOC_T00041209001	DNA ligase 1	1.36531
Cc11_g12870	GSCOC_T00032255001	Cyclic dof factor 2	1.36507
Cc06_g00430	GSCOC_T00023219001	Uncharacterized protein	1.36433
Cc06_g01970	GSCOC_T00023437001	Uncharacterized protein	1.36382
Cc11_g14480	GSCOC_T00032053001	Potassium transporter 6	1.36345
Cc06_g23630	GSCOC_T00040544001	Probable serine threonine- kinase PBL8	1.36302
Cc04_g07100	GSCOC_T00022515001	Uncharacterized protein	1.36234
Cc11_g01820	GSCOC_T00019508001	tRNA (cytosine(38)-C(5))-methyltransferase	1.36125
Cc00_g04550	GSCOC_T00013596001	Indole-3-acetic acid-amido synthetase	1.36116
Cc10_g13310	GSCOC_T00035315001	Pentatricopeptide repeat-containing At3g26540	1.36002
Cc04_g15140	GSCOC_T00002597001	Uncharacterized protein	1.35952
Cc01_g03010	GSCOC_T00019055001	disease resistance At4g10780	1.3583
Cc06_g17860	GSCOC_T00040378001	Uncharacterized protein	1.35737
Cc06_g17280	GSCOC_T00036363001	Probable aquaporin PIP1-5	1.35666
Cc10_g03040	GSCOC_T00024823001	Uncharacterized protein	1.35462
Cc03_g11620	GSCOC_T00019377001	Pentatricopeptide repeat-containing At2g17140	1.35417
Cc07_g10910	GSCOC_T00037059001	tRNA (cytosine(49)-C(5))-methyltransferase	1.35219
Cc02_g26330	GSCOC_T00028620001	Uncharacterized protein	1.35205
Cc11_g00290	GSCOC_T00019458001	DNA helicase MCM8	1.3515
Cc05_g07590	GSCOC_T00016753001	Ethylene-responsive transcription factor 4	1.35055
Cc06_g17820	GSCOC_T00040373001	Zeatin O-glucosyltransferase	1.34819
Cc00_g27050	GSCOC_T00012722001	F-box SKIP1	1.34704
Cc04_g01900	GSCOC_T00021853001	Chaperonin CPN60-like mitochondrial	1.34683
Cc07_g15890	GSCOC_T00036412001	Cytochrome P450 71B10	1.3457
Cc06_g20410	GSCOC_T00022972001	Disease resistance RPM1	1.34382
Cc00_g19950	GSCOC_T00002044001	late blight resistance homolog R1B-16	1.34267
Cc04_g06850	GSCOC_T00022485001	Uncharacterized protein	1.34259
Cc11_g09730	GSCOC_T00032680001	LEAF RUST 10 DISEASE-RESISTANCE LOCUS RECEPTOR-LIKE PROTEIN KINASE-like	1.34136
Cc11_g13600	GSCOC_T00032161001	Uncharacterized protein Mb2253c	1.34117
Cc10_g01350	GSCOC_T00024606001	Subtilisin-like protease	1.34075
Cc08_g08230	GSCOC_T00007245001	Molybdate transporter 2	1.34061
Cc00_g08380	GSCOC_T00009636001	Nucleobase-ascorbate transporter 5	1.34013
Cc09_g09390	GSCOC_T00023054001	snRNA-activating complex subunit 3	1.33827
Cc11_g00240	GSCOC_T00019451001	Homoserine kinase	1.33796
Cc04_g10710	GSCOC_T00042640001	Adenosylhomocysteinase 1	1.3361
Cc00_g27640	GSCOC_T00011085001	Uncharacterized protein	1.33581
Cc06_g22020	GSCOC_T00015617001	NLP6	1.33537
Cc00_g25440	GSCOC_T00011328001	Uncharacterized protein	1.33382
Cc00_g02990	GSCOC_T00004323001	Disease resistance RPP13	1.33283
Cc06_g08100	GSCOC_T00031173001	Uncharacterized protein	1.33275
Cc02_g08040	GSCOC_T00029858001	Heat shock cognate 70 kDa 2	1.33271
Cc06_g12230	GSCOC_T00041563001	Subtilisin-like protease	1.33145
Cc05_g00180	GSCOC_T00017043001	UDP-arabinose 4-epimerase 1	1.33072
Cc00_g10510	GSCOC_T00001808001	Vesicle-associated membrane 724	1.32828
Cc09_g04980	GSCOC_T00007068001	Mitochondrial amidoxime reducing component 2	1.3281
Cc00_g24470	GSCOC_T00011557001	Uncharacterized protein	1.32808
Cc00_g31180	GSCOC_T00005777001	SEC13 homolog	1.32806
Cc07_g13990	GSCOC_T00036669001	Receptor-like cytosolic serine threonine- kinase RBK1	1.32651
Cc09_g01590	GSCOC_T00017788001	Uncharacterized protein	1.32417
Cc06_g06360	GSCOC_T00031393001	HVA22 j	1.32378
Cc07_g19090	GSCOC_T00018642001	ATP-dependent DNA helicase Q-like 4B	1.32373
Cc01_g02940	GSCOC_T00013235001	G-type lectin S-receptor-like serine threonine- kinase At1g11303	1.32246
Cc00_g16000	GSCOC_T00009612001	disease resistance RPP13 1	1.32205
Cc05_g02370	GSCOC_T00020990001	Glutamine-dependent NAD(+) synthetase	1.32068
Cc02_g25530	GSCOC_T00028736001	Pentatricopeptide repeat-containing At5g01110	1.31962
Cc04_g05160	GSCOC_T00022261001	cyclic nucleotide-gated ion channel 8	1.31844
Cc06_g14270	GSCOC_T00041278001	Uncharacterized protein	1.31826
Cc06_g08060	GSCOC_T00031179001	Telomere-associated RIF1	1.31687
Cc08_g16700	GSCOC_T00035641001	Metal-nicotianamine transporter YSL3	1.31623
Cc06_g18960	GSCOC_T00028935001	Haloacid dehalogenase-like hydrolase domain-containing 3	1.31568
Cc05_g08830	GSCOC_T00016915001	Secologanin synthase	1.31438
Cc01_g08040	GSCOC_T00015491001	Late blight resistance R1-A	1.3139
Cc00_g31380	GSCOC_T00002540001	Disease resistance RPM1	1.31362
Cc05_g08390	GSCOC_T00016860001	F-box LRR-repeat MAX2 homolog	1.31341
Cc11_g11080	GSCOC_T00032487001	Uncharacterized protein	1.31064
Cc11_g00250	GSCOC_T00019453001	Glutamate receptor	1.31054
Cc07_g04850	GSCOC_T00039746001	Uncharacterized protein	1.30617
Cc06_g01210	GSCOC_T00023333001	Syntaxin-binding 5	1.30545
Cc05_g01740	GSCOC_T00015750001	Cytochrome P450 82A3	1.30438
Cc02_g19330	GSCOC_T00014498001	Uncharacterized protein	1.30435
Cc10_g15170	GSCOC_T00033685001	Probable serine threonine- kinase At1g54610	1.30396
Cc11_g14720	GSCOC_T00032019001	Carbonic chloroplastic	1.3035
Cc06_g10850	GSCOC_T00041727001	Zinc finger CCCH domain-containing 20	1.30324
Cc01_g19890	GSCOC_T00015999001	Uncharacterized protein	1.30285
Cc02_g10590	GSCOC_T00029512001	Small nuclear ribonucleo F	1.3028
Cc00_g11390	GSCOC_T00004898001	Basic leucine zipper 9	1.30151
Cc00_g27910	GSCOC_T00004299001	LRR receptor-like serine threonine- kinase FLS2	1.30111
Cc00_g05920	GSCOC_T00004279001	DNA repair and recombination RAD54-like	1.299
Cc00_g05530	GSCOC_T00006861001	SRG1	1.29799
Cc00_g20800	GSCOC_T00001159001	DETOXIFICATION 41	1.29768
Cc05_g10620	GSCOC_T00021418001	Uncharacterized sodium-dependent transporter	1.29612
Cc06_g03320	GSCOC_T00023613001	E3 ubiquitin- ligase RNF181 homolog	1.29567
Cc02_g31530	GSCOC_T00027543001	Uncharacterized protein	1.29406
Cc05_g16180	GSCOC_T00038597001	Post-GPI attachment to s factor 3	1.29294
Cc03_g00020	GSCOC_T00025573001	Aspartic ase oryzasin-1	1.29094
Cc06_g23270	GSCOC_T00040595001	F-box kelch-repeat At2g44130	1.28826
Cc04_g09060	GSCOC_T00022783001	LURP-one-related 8	1.28559
Cc00_g19020	GSCOC_T00011100001	SRG1	1.28278
Cc01_g12240	GSCOC_T00028154001	Bifunctional riboflavin biosynthesis RIBA chloroplastic	1.28216
Cc02_g05260	GSCOC_T00039029001	Rhodanese-like domain-containing 7	1.28209
Cc09_g00290	GSCOC_T00017966001	Alpha-ketoglutarate-dependent dioxygenase alkB homolog 3	1.28189
Cc02_g20650	GSCOC_T00014683001	Uncharacterized protein	1.27895
Cc11_g15820	GSCOC_T00038104001	Uncharacterized protein	1.27846
Cc07_g18470	GSCOC_T00018749001	5 exonuclease Apollo	1.27813
Cc06_g17620	GSCOC_T00040344001	Ribosomal RNA-processing 12	1.278
Cc02_g05730	GSCOC_T00039089001	Sister chromatid cohesion 1 1	1.27771
Cc09_g05270	GSCOC_T00007105001	Allantoate deiminase	1.27648
Cc00_g24720	GSCOC_T00004719001	Monomethylxanthine methyltransferase 1	1.27641
Cc10_g10090	GSCOC_T00031457001	late blight resistance homolog R1B-16	1.27396
Cc00_g08400	GSCOC_T00009638001	Galactoside 2-alpha-L-fucosyltransferase	1.27378
Cc00_g10790	GSCOC_T00000619001	Probable disease resistance RPP8 2	1.27341
Cc05_g09990	GSCOC_T00021514001	Amino acid permease 3	1.27302
Cc02_g05900	GSCOC_T00039110001	Uncharacterized protein	1.27256
Cc06_g10580	GSCOC_T00041760001	Probable glutamate carboxypeptidase AMP1	1.27235
Cc02_g37970	GSCOC_T00027923001	Gibberellin 3-beta-dioxygenase 4	1.27076
Cc08_g02180	GSCOC_T00037679001	Disease resistance RPM1	1.2702
Cc04_g00930	GSCOC_T00021721001	Auxin-repressed kDa	1.2684
Cc01_g21830	GSCOC_T00004933001	CAJ1	1.26825
Cc09_g05760	GSCOC_T00033421001	50S ribosomal L7 L12	1.268
Cc00_g00700	GSCOC_T00036172001	late blight resistance homolog R1B-14	1.26793
Cc00_g21970	GSCOC_T00011086001	MDIS1-interacting receptor like kinase 2	1.26672
Cc07_g18980	GSCOC_T00018657001	Pentatricopeptide repeat-containing mitochondrial	1.26666
Cc00_g05710	GSCOC_T00006257001	Dihydropyrimidinase	1.26629
Cc08_g14740	GSCOC_T00035380001	F-box At5g55150	1.26616
Cc01_g15410	GSCOC_T00016563001	Root phototropism 2	1.26582
Cc05_g06810	GSCOC_T00042196001	Uncharacterized protein	1.26483
Cc10_g09570	GSCOC_T00031526001	Uncharacterized protein	1.26459
Cc09_g02800	GSCOC_T00017628001	transcription elongation factor SPT5 homolog 2	1.26443
Cc02_g14490	GSCOC_T00013860001	Pyruvate decarboxylase 1	1.26356
Cc02_g39880	GSCOC_T00027649001	CBL-interacting serine threonine- kinase 9	1.26344
Cc09_g09940	GSCOC_T00041110001	SRG1	1.26328
Cc04_g08540	GSCOC_T00022716001	F-box At5g49610	1.26171
Cc06_g14670	GSCOC_T00041225001	Peroxisome biogenesis 12	1.26161
Cc00_g13020	GSCOC_T00002080001	Uncharacterized protein	1.26146
Cc09_g02330	GSCOC_T00017690001	Two-component response regulator-like PRR37	1.2611
Cc10_g09060	GSCOC_T00034302001	Pentatricopeptide repeat-containing At1g71490	1.2608
Cc05_g02380	GSCOC_T00020989001	Uncharacterized protein	1.26033
Cc04_g13250	GSCOC_T00018903001	Chaperone 1	1.26007
Cc07_g18940	GSCOC_T00018663001	pentatricopeptide repeat-containing mitochondrial	1.25974
Cc01_g10340	GSCOC_T00024123001	DNA ligase 1	1.25954
Cc05_g12860	GSCOC_T00021133001	G-type lectin S-receptor-like serine threonine- kinase At4g27290	1.25925
Cc01_g20190	GSCOC_T00015962001	Xanthoxin dehydrogenase	1.2588
Cc00_g33510	GSCOC_T00006255001	Uncharacterized protein	1.25734
Cc01_g09430	GSCOC_T00023995001	Pentatricopeptide repeat-containing At2g27610	1.25622
Cc04_g07380	GSCOC_T00022554001	ASPARTIC PROTEASE IN GUARD CELL 1	1.25576
Cc00_g23240	GSCOC_T00010616001	Uncharacterized protein	1.25478
Cc00_g15890	GSCOC_T00004657001	disease resistance RPP13 1	1.25233
Cc11_g16410	GSCOC_T00038180001	Probable carboxylesterase 16	1.25152
Cc04_g05690	GSCOC_T00022334001	Sucrose nonfermenting 4	1.25045
Cc09_g09790	GSCOC_T00007639001	WD-40 repeat-containing MSI2	1.25031
Cc06_g20110	GSCOC_T00022914001	UDP-glucose flavonoid 3-O-glucosyltransferase 3	1.24975
Cc06_g14990	GSCOC_T00030896001	Uncharacterized protein	1.24893
Cc00_g22960	GSCOC_T00011923001	Uncharacterized protein	1.24832
Cc02_g33400	GSCOC_T00015369001	Pentatricopeptide repeat-containing At3g05340	1.24814
Cc00_g22430	GSCOC_T00010091001	Uncharacterized protein	1.24594
Cc08_g13140	GSCOC_T00030377001	Flavonoid 3 -monooxygenase	1.24576
Cc02_g22040	GSCOC_T00014860001	Pentatricopeptide repeat-containing mitochondrial	1.24556
Cc00_g14320	GSCOC_T00011142001	NADP-dependent D-sorbitol-6-phosphate dehydrogenase	1.24373
Cc11_g04150	GSCOC_T00034051001	late blight resistance homolog R1B-17	1.24196
Cc03_g03180	GSCOC_T00025997001	Basic 7S globulin	1.24128
Cc08_g08040	GSCOC_T00013079001	Uncharacterized protein	1.24125
Cc00_g15840	GSCOC_T00011230001	Pentatricopeptide repeat-containing chloroplastic	1.24092
Cc05_g08800	GSCOC_T00016912001	Secologanin synthase	1.2391
Cc08_g12270	GSCOC_T00030504001	Uncharacterized protein	1.23864
Cc10_g03110	GSCOC_T00024832001	Zinc finger NUTCRACKER	1.23804
Cc01_g11780	GSCOC_T00028088001	NRT1 PTR FAMILY	1.2373
Cc02_g18340	GSCOC_T00014374001	Probable esterase PIR7A	1.23695
Cc03_g05950	GSCOC_T00026369001	NRT1 PTR FAMILY	1.23356
Cc05_g05310	GSCOC_T00035098001	Uncharacterized protein	1.23296
Cc02_g05870	GSCOC_T00039107001	Arogenate dehydrogenase chloroplastic	1.23089
Cc11_g02490	GSCOC_T00018504001	late blight resistance homolog R1B-17	1.23001
Cc01_g21110	GSCOC_T00005021001	Ethylene receptor 1	1.22978
Cc04_g14070	GSCOC_T00035931001	1-deoxy-D-xylulose 5-phosphate chloroplastic	1.22881
Cc06_g21100	GSCOC_T00034082001	DNA-directed RNA polymerase III subunit RPC10	1.22836
Cc00_g24210	GSCOC_T00008185001	Small subunit processome component 20 homolog	1.22825
Cc01_g10810	GSCOC_T00024188001	Receptor 12	1.2281
Cc09_g04570	GSCOC_T00017410001	Endoglucanase 24	1.22766
Cc06_g08750	GSCOC_T00031090001	Uncharacterized protein At1g15400	1.22759
Cc10_g11270	GSCOC_T00018481001	late blight resistance homolog R1A-6	1.22662
Cc02_g07180	GSCOC_T00009485001	UDP-glycosyltransferase 85A2	1.22643
Cc04_g14090	GSCOC_T00035935001	pentatricopeptide repeat-containing At5g08490	1.22584
Cc11_g04730	GSCOC_T00042900001	Cytochrome P450 78A3	1.22543
Cc05_g14240	GSCOC_T00038845001	EH domain-containing 1	1.2251
Cc03_g09550	GSCOC_T00030937001	late blight resistance homolog R1B-16	1.22344
Cc07_g05110	GSCOC_T00039773001	UPF0496 1	1.22283
Cc05_g11000	GSCOC_T00021370001	Pathogen-related	1.22276
Cc00_g28370	GSCOC_T00003975001	ATP-dependent zinc metalloprotease chloroplastic (Fragment)	1.22185
Cc07_g06420	GSCOC_T00039946001	ADP-ribosylation factor 1	1.22137
Cc02_g29960	GSCOC_T00038928001	disease resistance RPP13 1	1.2208
Cc02_g35540	GSCOC_T00042833001	Zinc finger CCCH domain-containing 3	1.22068
Cc07_g11430	GSCOC_T00037002001	Rhodanese-like domain-containing chloroplastic	1.22005
Cc10_g16360	GSCOC_T00011268001	Uncharacterized protein	1.21946
Cc05_g13300	GSCOC_T00021079001	translation factor SUI1 homolog	1.21944
Cc08_g06170	GSCOC_T00040977001	F-box At5g55150	1.21917
Cc00_g31060	GSCOC_T00006034001	Uncharacterized protein	1.21873
Cc00_g27090	GSCOC_T00008172001	disease resistance RPP13 1	1.21864
Cc05_g14930	GSCOC_T00038757001	TIC 20- chloroplastic	1.21797
Cc06_g07970	GSCOC_T00031191001	Uncharacterized protein	1.21597
Cc10_g15220	GSCOC_T00033691001	MDIS1-interacting receptor like kinase 2	1.21592
Cc04_g11450	GSCOC_T00037333001	Pentatricopeptide repeat-containing mitochondrial	1.21507
Cc02_g36150	GSCOC_T00006319001	Probable aldo-keto reductase 3	1.215
Cc11_g03190	GSCOC_T00025453001	Pentatricopeptide repeat-containing mitochondrial	1.21368
Cc02_g22410	GSCOC_T00014912001	elongation of fatty acids DDB_G0272012	1.21144
Cc07_g02650	GSCOC_T00039466001	Chloroplastic group IIA intron splicing facilitator chloroplastic	1.21104
Cc06_g13380	GSCOC_T00041407001	Zinc finger 2	1.21068
Cc00_g34510	GSCOC_T00004720001	BTB POZ domain-containing At1g55760	1.20952
Cc06_g03090	GSCOC_T00023580001	Pentatricopeptide repeat-containing mitochondrial	1.20914
Cc00_g20620	GSCOC_T00012897001	late blight resistance homolog R1B-14	1.20842
Cc08_g14030	GSCOC_T00030273001	Transcriptional corepressor SEUSS	1.20818
Cc04_g04320	GSCOC_T00022156001	Uncharacterized protein	1.20546
Cc03_g04600	GSCOC_T00026186001	CBL-interacting kinase 7	1.20477
Cc00_g12850	GSCOC_T00008936001	Uncharacterized protein	1.20423
Cc03_g03980	GSCOC_T00026099001	Uncharacterized N-acetyltransferase p20	1.20417
Cc07_g12670	GSCOC_T00036845001	Uncharacterized protein	1.20367
Cc00_g23350	GSCOC_T00012066001	O-acyltransferase WSD1	1.20242
Cc06_g09580	GSCOC_T00041895001	Uncharacterized protein	1.20189
Cc02_g19730	GSCOC_T00014547001	BTB POZ domain-containing NPY2	1.20033
Cc02_g38990	GSCOC_T00027780001	Light-sensor kinase	1.19909
Cc00_g02840	GSCOC_T00011551001	Uncharacterized protein	1.1988
Cc02_g34440	GSCOC_T00000689001	Pentatricopeptide repeat-containing mitochondrial	1.19848
Cc10_g11630	GSCOC_T00001434001	Late blight resistance R1-A	1.19756
Cc00_g30840	GSCOC_T00006253001	NAC transcription factor 29	1.19747
Cc00_g33560	GSCOC_T00010573001	40S ribosomal S10-3	1.19745
Cc08_g16830	GSCOC_T00035658001	Uncharacterized protein	1.19726
Cc02_g03060	GSCOC_T00020176001	Pentatricopeptide repeat-containing At3g29230	1.19707
Cc05_g07960	GSCOC_T00016801001	GTP-binding homolog	1.19626
Cc07_g10210	GSCOC_T00037147001	Thioredoxin H-type	1.19569
Cc01_g11790	GSCOC_T00028089001	Mitogen-activated kinase 3	1.19543
Cc05_g09650	GSCOC_T00021556001	Chlorophyll a-b binding chloroplastic (Fragments)	1.19493
Cc02_g00210	GSCOC_T00019796001	Uncharacterized protein	1.1941
Cc01_g21050	GSCOC_T00005027001	Sucrose synthase 2	1.19227
Cc10_g13770	GSCOC_T00035238001	Uncharacterized protein	1.19166
Cc05_g04620	GSCOC_T00031702001	Uncharacterized protein	1.19108
Cc04_g00270	GSCOC_T00021630001	F-box kelch-repeat At1g51550	1.18593
Cc02_g01040	GSCOC_T00019912001	Probable 6-phosphogluconolactonase chloroplastic	1.18563
Cc11_g05270	GSCOC_T00020471001	Sodium hydrogen exchanger 7	1.18509
Cc03_g01260	GSCOC_T00025732001	Uncharacterized protein	1.18226
Cc01_g15200	GSCOC_T00016592001	Uncharacterized protein	1.18201
Cc04_g08180	GSCOC_T00022670001	Phosphatidylinositol 4-kinase gamma 5	1.18125
Cc02_g21010	GSCOC_T00014732001	Peptidyl-prolyl cis-trans isomerase FKBP12	1.18074
Cc11_g12350	GSCOC_T00032330001	26S proteasome non-ATPase regulatory subunit 10	1.17985
Cc00_g04380	GSCOC_T00010849001	UDP-glycosyltransferase 86A1	1.17944
Cc01_g09120	GSCOC_T00023956001	Ferredoxin- chloroplastic	1.17864
Cc07_g15380	GSCOC_T00036482001	Probable trehalose-phosphate phosphatase J	1.17836
Cc01_g05610	GSCOC_T00027370001	Vacuolar amino acid transporter 1	1.17752
Cc02_g00290	GSCOC_T00019805001	SMG9	1.17725
Cc08_g04340	GSCOC_T00034256001	Isoflavone reductase homolog	1.17709
Cc11_g09850	GSCOC_T00032663001	Uncharacterized RING finger	1.17689
Cc00_g05490	GSCOC_T00000308001	late blight resistance homolog R1B-12	1.17622
Cc07_g08660	GSCOC_T00040251001	LEAF RUST 10 DISEASE-RESISTANCE LOCUS RECEPTOR-LIKE PROTEIN KINASE-like	1.17593
Cc06_g03030	GSCOC_T00023573001	Auxin-induced 5NG4	1.17572
Cc02_g04570	GSCOC_T00020374001	Hexose carrier HEX6	1.17555
Cc02_g20570	GSCOC_T00014672001	Uncharacterized protein	1.17486
Cc00_g30030	GSCOC_T00009749001	Multidrug and toxin extrusion 1	1.17411
Cc06_g23800	GSCOC_T00040518001	Cytochrome P450 716B2	1.17329
Cc10_g15250	GSCOC_T00033698001	MDIS1-interacting receptor like kinase 2	1.17263
Cc05_g10160	GSCOC_T00021494001	Probable glutathione S-transferase parC	1.17251
Cc08_g02570	GSCOC_T00037734001	Uncharacterized protein	1.17171
Cc06_g23710	GSCOC_T00040535001	Squamosa promoter-binding 12	1.17115
Cc05_g01930	GSCOC_T00007324001	Uncharacterized protein	1.17101
Cc03_g14030	GSCOC_T00031784001	Uncharacterized protein	1.17088
Cc06_g00690	GSCOC_T00023259001	Solute carrier family 40 member 2	1.17002
Cc07_g04680	GSCOC_T00039725001	Pentatricopeptide repeat-containing mitochondrial	1.16968
Cc00_g24320	GSCOC_T00006032001	UDP-rhamnose:rhamnosyltransferase 1	1.16733
Cc02_g37510	GSCOC_T00027980001	(+)-neomenthol dehydrogenase	1.16719
Cc05_g04800	GSCOC_T00035016001	DETOXIFICATION 41	1.16655
Cc07_g10470	GSCOC_T00037112001	B-box zinc finger 22	1.16634
Cc09_g02810	GSCOC_T00017627001	transcription elongation factor SPT5 homolog 2	1.16601
Cc07_g05190	GSCOC_T00039785001	Uncharacterized protein	1.16593
Cc07_g13290	GSCOC_T00036762001	Glutamine synthetase cytosolic isozyme 1	1.16436
Cc00_g07620	GSCOC_T00006752001	RuvB-like helicase 1	1.16403
Cc09_g05510	GSCOC_T00013393001	Uncharacterized protein	1.16297
Cc10_g03120	GSCOC_T00024833001	Cytochrome P450 734A1	1.16208
Cc06_g08590	GSCOC_T00031110001	Pentatricopeptide repeat-containing mitochondrial	1.16112
Cc06_g01500	GSCOC_T00023370001	Uncharacterized protein	1.16078
Cc00_g09210	GSCOC_T00012301001	Cytochrome P450 71A2	1.15884
Cc08_g02230	GSCOC_T00037685001	Disease resistance RPM1	1.1579
Cc01_g18000	GSCOC_T00016256001	Uncharacterized protein	1.15696
Cc00_g14260	GSCOC_T00010609001	Pentatricopeptide repeat-containing At2g17670	1.15522
Cc02_g11030	GSCOC_T00029464001	Vacuolar amino acid transporter 1	1.15385
Cc07_g14170	GSCOC_T00036649001	Uncharacterized protein	1.15372
Cc04_g03260	GSCOC_T00022019001	Uncharacterized protein	1.15292
Cc03_g01910	GSCOC_T00025820001	Uncharacterized protein	1.15282
Cc02_g29640	GSCOC_T00009326001	Phosphatidylinositol 4-phosphate 5-kinase 6	1.15255
Cc02_g17340	GSCOC_T00014246001	Glucose-1-phosphate adenylyltransferase large subunit 1 (Fragment)	1.15132
Cc05_g07910	GSCOC_T00016795001	disease resistance RGA3	1.15055
Cc07_g13330	GSCOC_T00036757001	Uncharacterized protein	1.15013
Cc00_g21510	GSCOC_T00008527001	UDP-glucose flavonoid 3-O-glucosyltransferase 6	1.15012
Cc03_g05620	GSCOC_T00026324001	Uncharacterized protein	1.14975
Cc07_g12660	GSCOC_T00036846001	Deglycase PH1704	1.14914
Cc02_g33020	GSCOC_T00016741001	GDSL esterase lipase 1	1.14858
Cc10_g07730	GSCOC_T00034485001	Vacuolar amino acid transporter 6	1.14819
Cc11_g16590	GSCOC_T00038199001	Uncharacterized protein	1.14783
Cc00_g35860	GSCOC_T00013156001	Uncharacterized protein	1.14644
Cc02_g06820	GSCOC_T00039233001	Probable aquaporin PIP1-2	1.14587
Cc10_g13330	GSCOC_T00035311001	Uncharacterized acetyltransferase At3g50280	1.14542
Cc00_g11930	GSCOC_T00012258001	Uncharacterized protein	1.14498
Cc05_g14210	GSCOC_T00038849001	Glucan endo-	1.14489
Cc02_g01440	GSCOC_T00019967001	Uncharacterized protein	1.14484
Cc04_g10260	GSCOC_T00042569001	Uncharacterized protein	1.14425
Cc01_g15710	GSCOC_T00016530001	Adenine DNA glycosylase	1.14372
Cc06_g10970	GSCOC_T00041711001	Histone acetyltransferase type B catalytic subunit	1.1404
Cc01_g14080	GSCOC_T00028397001	NAD(P)H dehydrogenase (quinone)	1.14035
Cc05_g08620	GSCOC_T00016889001	Uncharacterized protein	1.14011
Cc00_g20110	GSCOC_T00006215001	Uncharacterized protein	1.13941
Cc05_g05930	GSCOC_T00035180001	Cyclin-D6-1	1.13908
Cc00_g11080	GSCOC_T00000147001	Secologanin synthase	1.13905
Cc07_g08320	GSCOC_T00040202001	Uncharacterized protein	1.1377
Cc08_g11260	GSCOC_T00027125001	Thioredoxin chloroplastic	1.13731
Cc02_g07220	GSCOC_T00029972001	Uncharacterized protein	1.13646
Cc02_g39520	GSCOC_T00027704001	Auxin response factor 7	1.13601
Cc10_g02350	GSCOC_T00024736001	Agglutinin	1.13383
Cc02_g34930	GSCOC_T00011802001	Pyrophosphate-energized vacuolar membrane proton pump	1.13327
Cc00_g08180	GSCOC_T00000292001	Endoplasmin homolog	1.13164
Cc06_g03790	GSCOC_T00023675001	NAC transcription factor 29	1.13086
Cc06_g20150	GSCOC_T00022923001	Calmodulin-interacting 111	1.13066
Cc00_g22940	GSCOC_T00003955001	SMG8	1.12943
Cc00_g02500	GSCOC_T00010287001	F-box kelch-repeat SKIP25	1.12933
Cc02_g05880	GSCOC_T00039108001	Uncharacterized protein	1.12931
Cc04_g10020	GSCOC_T00042536001	SNF1-related kinase regulatory subunit gamma-1	1.1293
Cc02_g22280	GSCOC_T00014895001	Uncharacterized protein	1.12757
Cc04_g05280	GSCOC_T00022276001	Uncharacterized protein C1450.15	1.12705
Cc03_g06420	GSCOC_T00026436001	DNA mismatch repair	1.12581
Cc03_g15070	GSCOC_T00026764001	BTB POZ and TAZ domain-containing 3	1.12485
Cc07_g03570	GSCOC_T00039597001	NAC domain-containing 100	1.1236
Cc02_g11200	GSCOC_T00029442001	Tyramine N-feruloyltransferase 4 11	1.12226
Cc03_g11170	GSCOC_T00042076001	Actin-related 2 3 complex subunit 4	1.12193
Cc00_g08960	GSCOC_T00010161001	Bifunctional dihydroflavonol 4-reductase flavanone 4-reductase	1.12192
Cc07_g15900	GSCOC_T00036409001	Cytochrome P450 71A1	1.12164
Cc07_g03510	GSCOC_T00039586001	Polypyrimidine tract-binding homolog 1	1.12003
Cc07_g00720	GSCOC_T00019150001	Uncharacterized RNA methyltransferase pc1998	1.11807
Cc08_g01870	GSCOC_T00037640001	Pentatricopeptide repeat-containing At3g29230	1.1176
Cc00_g03090	GSCOC_T00003064001	Uncharacterized protein	1.11712
Cc00_g31570	GSCOC_T00009134001	BTB POZ domain-containing At1g55760	1.11655
Cc07_g10460	GSCOC_T00037114001	Probable serine protease EDA2	1.11479
Cc06_g06730	GSCOC_T00031347001	Pentatricopeptide repeat-containing At4g39530	1.11468
Cc00_g33900	GSCOC_T00010189001	Uncharacterized protein	1.11422
Cc03_g09300	GSCOC_T00042688001	UDP-glycosyltransferase 75D1	1.11355
Cc02_g10380	GSCOC_T00029535001	Bark storage A	1.11271
Cc02_g09840	GSCOC_T00029602001	Hippocampus abundant transcript 1	1.11261
Cc06_g08940	GSCOC_T00041984001	Uncharacterized protein	1.11181
Cc00_g22470	GSCOC_T00009593001	COBRA 4	1.11136
Cc06_g14980	GSCOC_T00030897001	Uncharacterized protein	1.1112
Cc06_g12180	GSCOC_T00041568001	Tubulin--tyrosine ligase 12	1.11119
Cc11_g12360	GSCOC_T00032328001	Uncharacterized protein	1.11092
Cc06_g11820	GSCOC_T00041612001	WD repeat-containing 61	1.11091
Cc11_g10510	GSCOC_T00032568001	Uncharacterized protein	1.11079
Cc00_g08360	GSCOC_T00009633001	Chaperone	1.11047
Cc02_g03630	GSCOC_T00020253001	Carboxylesterase 1	1.10989
Cc02_g37610	GSCOC_T00027966001	Bifunctional	1.10947
Cc06_g15300	GSCOC_T00030848001	Outer membrane lipo Blc	1.10897
Cc06_g02250	GSCOC_T00023476001	Transcription factor EMB1444	1.10885
Cc01_g17570	GSCOC_T00016306001	Ribokinase	1.10809
Cc06_g21960	GSCOC_T00015610001	NLP7	1.10795
Cc00_g26060	GSCOC_T00003724001	Uncharacterized protein	1.1055
Cc00_g21880	GSCOC_T00013638001	UDP-glycosyltransferase 83A1	1.10492
Cc06_g13130	GSCOC_T00041441001	Probable receptor-like serine threonine- kinase At5g57670	1.10422
Cc05_g01020	GSCOC_T00000794001	disease resistance RGA1	1.10308
Cc04_g09310	GSCOC_T00022814001	Guanine nucleotide-binding alpha-1 subunit	1.10262
Cc00_g01980	GSCOC_T00000823001	Uncharacterized protein	1.10241
Cc03_g13750	GSCOC_T00031730001	Pentatricopeptide repeat-containing chloroplastic	1.10202
Cc08_g06780	GSCOC_T00005816001	Endoribonuclease Dicer homolog 3a	1.10189
Cc03_g05650	GSCOC_T00026329001	pentatricopeptide repeat-containing At3g23330	1.10025
Cc07_g14070	GSCOC_T00036659001	Uncharacterized protein	1.09946
Cc05_g12060	GSCOC_T00021236001	Metallothionein type 3	1.09904
Cc00_g17310	GSCOC_T00001367001	Cysteine-rich receptor kinase 25	1.09899
Cc08_g12190	GSCOC_T00030515001	Probable glycosyltransferase At5g03795	1.09796
Cc01_g16410	GSCOC_T00016445001	Peptidyl-prolyl cis-trans isomerase FKBP62	1.09742
Cc11_g05260	GSCOC_T00020470001	Sodium hydrogen exchanger 7	1.09705
Cc08_g13910	GSCOC_T00030289001	DNA-directed RNA polymerase IV subunit 1	1.09685
Cc08_g15510	GSCOC_T00035483001	Aluminum-activated malate transporter 9	1.09671
Cc00_g17560	GSCOC_T00008472001	Uncharacterized protein	1.09642
Cc07_g13440	GSCOC_T00036736001	Sn1-specific diacylglycerol lipase alpha	1.09608
Cc02_g01120	GSCOC_T00019920001	UPF0160 mitochondrial	1.09521
Cc09_g09590	GSCOC_T00004079001	Dehydrogenase reductase SDR family member on chromosome X	1.09517
Cc05_g12010	GSCOC_T00021244001	SPA1-RELATED 3	1.09477
Cc00_g32410	GSCOC_T00006083001	SRG1	1.09419
Cc01_g20970	GSCOC_T00005039001	Late embryogenesis abundant Lea5	1.09372
Cc02_g33120	GSCOC_T00015326001	Heavy metal-associated isoprenylated plant 26	1.09366
Cc03_g10570	GSCOC_T00007797001	ATP-dependent DNA helicase 2 subunit KU70	1.09056
Cc02_g09340	GSCOC_T00029665001	Cytosolic sulfotransferase 5	1.09044
Cc08_g16520	GSCOC_T00035614001	Methyltransferase mitochondrial	1.08987
Cc07_g17460	GSCOC_T00037428001	Serine threonine- kinase ULK3	1.08954
Cc00_g33050	GSCOC_T00011764001	ABC transporter C family member 14	1.08892
Cc01_g02430	GSCOC_T00009710001	Uncharacterized protein At5g01610	1.08825
Cc09_g00170	GSCOC_T00017982001	Calcineurin B 2	1.08812
Cc09_g07140	GSCOC_T00036309001	Ribose-5-phosphate isomerase A	1.08798
Cc07_g18690	GSCOC_T00018714001	Probable disease resistance At4g27220	1.08795
Cc11_g05670	GSCOC_T00020531001	clathrin assembly At1g25240	1.08704
Cc08_g01380	GSCOC_T00038395001	Nuclear transcription factor Y subunit A-3	1.08617
Cc01_g19010	GSCOC_T00016114001	Zinc finger NUTCRACKER	1.08576
Cc05_g16330	GSCOC_T00038575001	rRNA methylase	1.08344
Cc01_g14390	GSCOC_T00028437001	Chromodomain-helicase-DNA-binding 4	1.08277
Cc00_g31460	GSCOC_T00011251001	UDP-rhamnose:rhamnosyltransferase 1	1.08229
Cc06_g22260	GSCOC_T00017180001	F-box CPR1	1.08218
Cc08_g01780	GSCOC_T00038336001	Probable purine permease 10	1.08163
Cc08_g04550	GSCOC_T00015648001	Disease resistance RPM1	1.08085
Cc08_g13550	GSCOC_T00030331001	Uncharacterized protein	1.08082
Cc06_g03390	GSCOC_T00023621001	REVEILLE 3	1.0807
Cc07_g17040	GSCOC_T00037482001	late blight resistance homolog R1B-14	1.08055
Cc00_g24380	GSCOC_T00002088001	Uncharacterized protein	1.08017
Cc01_g10850	GSCOC_T00024199001	Uncharacterized protein	1.08006
Cc11_g04700	GSCOC_T00042896001	Cleavage stimulation factor subunit 1	1.07901
Cc02_g12670	GSCOC_T00029253001	Uncharacterized protein	1.07855
Cc00_g20080	GSCOC_T00006211001	ABC transporter G family member 11	1.07794
Cc08_g10470	GSCOC_T00027015001	UPF0481 At3g47200	1.0779
Cc02_g31110	GSCOC_T00027620001	Uncharacterized protein	1.07783
Cc11_g16500	GSCOC_T00038190001	Uncharacterized protein	1.07698
Cc11_g09760	GSCOC_T00032675001	Mitochondrial substrate carrier family W	1.07496
Cc06_g07300	GSCOC_T00031281001	Double-stranded RNA-binding 4	1.07463
Cc08_g04140	GSCOC_T00034223001	disease resistance RGA1	1.07381
Cc00_g08390	GSCOC_T00009637001	Peptidyl-prolyl cis-trans isomerase NIMA-interacting 4	1.07331
Cc03_g10870	GSCOC_T00042019001	Deoxyhypusine hydroxylase	1.07183
Cc11_g14230	GSCOC_T00032086001	DNA polymerase lambda	1.07164
Cc03_g04910	GSCOC_T00026222001	N-carbamoyl-L-amino acid hydrolase	1.0709
Cc10_g00740	GSCOC_T00024532001	Uncharacterized protein	1.0704
Cc06_g04170	GSCOC_T00023726001	Phosphoglycerate cytosolic	1.07026
Cc06_g09060	GSCOC_T00041970001	Probable histone H2A variant 3	1.06968
Cc02_g18630	GSCOC_T00014413001	Probable carboxylesterase 12	1.06885
Cc10_g01760	GSCOC_T00024663001	tRNA (adenine(58)-N(1))-methyltransferase non-catalytic subunit trm6	1.06862
Cc00_g32270	GSCOC_T00007368001	Secologanin synthase	1.06848
Cc01_g19030	GSCOC_T00016111001	Probable inactive kinase At3g63330	1.06741
Cc08_g00970	GSCOC_T00038445001	Uncharacterized protein	1.06709
Cc07_g20130	GSCOC_T00033933001	Uncharacterized protein	1.06607
Cc10_g00900	GSCOC_T00024550001	Uncharacterized protein	1.06595
Cc06_g12300	GSCOC_T00041552001	Adipocyte plasma membrane-associated	1.06531
Cc07_g12470	GSCOC_T00036869001	Probable acyl-activating enzyme peroxisomal	1.06473
Cc01_g00390	GSCOC_T00005539001	Disease resistance RGA2	1.06404
Cc04_g06350	GSCOC_T00022421001	Pentatricopeptide repeat-containing At3g18020	1.06396
Cc00_g01350	GSCOC_T00010935001	late blight resistance homolog R1A-6	1.06364
Cc01_g16930	GSCOC_T00016385001	Pentatricopeptide repeat-containing chloroplastic	1.06239
Cc01_g17640	GSCOC_T00016298001	Activating molecule in BECN1-regulated autophagy 1	1.06184
Cc05_g14950	GSCOC_T00038754001	Nudix hydrolase 10	1.06107
Cc07_g19100	GSCOC_T00018641001	eIF-2-alpha kinase GCN2	1.0607
Cc02_g29880	GSCOC_T00038900001	disease resistance At3g14460	1.06069
Cc02_g30890	GSCOC_T00023845001	G-type lectin S-receptor-like serine threonine- kinase At4g27290	1.05973
Cc02_g20640	GSCOC_T00014682001	Uncharacterized protein	1.05958
Cc02_g21890	GSCOC_T00014839001	NAC domain-containing 71	1.05892
Cc00_g15190	GSCOC_T00005655001	Glucan endo-	1.05769
Cc06_g05250	GSCOC_T00043065001	Uncharacterized protein	1.05765
Cc09_g05280	GSCOC_T00007106001	Allantoate deiminase	1.05537
Cc05_g11520	GSCOC_T00021306001	Uncharacterized protein	1.05528
Cc03_g00430	GSCOC_T00025624001	Dihydrolipoyl dehydrogenase mitochondrial	1.05492
Cc03_g00110	GSCOC_T00025587001	Proline-rich receptor kinase PERK8	1.0549
Cc00_g03060	GSCOC_T00003059001	Dehydrodolichyl diphosphate synthase 6	1.05408
Cc03_g06840	GSCOC_T00026504001	Uncharacterized protein	1.05348
Cc06_g19970	GSCOC_T00022886001	SWI SNF-related matrix-associated actin-dependent regulator of chromatin subfamily A member 3-like 1	1.05336
Cc04_g16110	GSCOC_T00042402001	Transcription factor MYB1R1	1.05271
Cc04_g01610	GSCOC_T00021819001	DNA-directed RNA polymerase I subunit rpa49	1.05265
Cc06_g11210	GSCOC_T00041685001	K(+) efflux antiporter 6	1.0522
Cc08_g14340	GSCOC_T00030236001	Uncharacterized protein	1.0519
Cc06_g10410	GSCOC_T00041782001	E3 ubiquitin- ligase RING1	1.05043
Cc11_g15880	GSCOC_T00038114001	GDSL esterase lipase At3g26430	1.05019
Cc06_g01730	GSCOC_T00023406001	OTU domain-containing At3g57810	1.04995
Cc06_g16790	GSCOC_T00004130001	Vignain	1.04974
Cc05_g03300	GSCOC_T00033536001	Phosphoacetylglucosamine mutase	1.04966
Cc05_g07550	GSCOC_T00042287001	Zinc finger CCCH domain-containing 61	1.04952
Cc00_g30770	GSCOC_T00009996001	Uncharacterized protein	1.04862
Cc02_g08380	GSCOC_T00029799001	Photosynthetic NDH subunit of lumenal location chloroplastic	1.04841
Cc00_g23840	GSCOC_T00006915001	60S ribosomal L23A	1.04721
Cc08_g08800	GSCOC_T00017212001	BURP domain RD22	1.04706
Cc07_g19140	GSCOC_T00018636001	ATP-dependent DNA helicase Q-like 4B	1.047
Cc02_g10650	GSCOC_T00029506001	Ras-related RABC2a	1.0469
Cc08_g05440	GSCOC_T00024308001	Uncharacterized protein	1.0467
Cc06_g06710	GSCOC_T00031349001	Nuclear transcription factor Y subunit A-2	1.04558
Cc02_g26860	GSCOC_T00024993001	Probable mitochondrial chaperone bcs1	1.04495
Cc04_g00900	GSCOC_T00021718001	Uncharacterized protein	1.04482
Cc00_g07610	GSCOC_T00006750001	Uncharacterized protein	1.04405
Cc05_g08260	GSCOC_T00016844001	LRR receptor-like serine threonine- kinase GSO1	1.04402
Cc06_g03530	GSCOC_T00023638001	Pentatricopeptide repeat-containing chloroplastic	1.04373
Cc02_g17750	GSCOC_T00014300001	Dehydrodolichyl diphosphate synthase complex subunit NUS1	1.04137
Cc04_g08700	GSCOC_T00022743001	G-type lectin S-receptor-like serine threonine- kinase CES101	1.04073
Cc07_g14180	GSCOC_T00036648001	Reticuline oxidase	1.0405
Cc06_g13290	GSCOC_T00041418001		1.04007
Cc02_g08130	GSCOC_T00029842001	Pentatricopeptide repeat-containing At4g33990	1.03923
Cc01_g19280	GSCOC_T00016082001	Uncharacterized protein	1.03874
Cc01_g11910	GSCOC_T00028107001	Uncharacterized protein	1.03634
Cc02_g35900	GSCOC_T00042775001	Pentatricopeptide repeat-containing chloroplastic	1.03404
Cc11_g12160	GSCOC_T00032354001	COBW domain-containing 1	1.03403
Cc04_g12970	GSCOC_T00011359001	Alpha-N-acetylglucosaminidase	1.03333
Cc03_g11990	GSCOC_T00015313001	Histone-lysine N-methyltransferase ASHH1	1.03322
Cc02_g07820	GSCOC_T00029889001	DNA replication complex GINS PSF2	1.03319
Cc03_g06140	GSCOC_T00026392001	disease resistance At1g59780	1.03296
Cc08_g11330	GSCOC_T00027133001	(S)-ureidoglycine aminohydrolase	1.03261
Cc04_g08770	GSCOC_T00022751001	RNA pseudouridine synthase mitochondrial	1.03254
Cc08_g10710	GSCOC_T00027045001	esterase lipase HI_0193	1.03245
Cc06_g09230	GSCOC_T00041941001	Transmembrane 19	1.03224
Cc06_g10540	GSCOC_T00041765001	Uncharacterized protein	1.03205
Cc07_g20530	GSCOC_T00015720001	Uncharacterized protein	1.032
Cc02_g00150	GSCOC_T00019790001	Uncharacterized sugar kinase slr0537	1.03193
Cc10_g10230	GSCOC_T00031438001	Probable E3 ubiquitin- ligase ARI2	1.03178
Cc06_g11240	GSCOC_T00041681001	Uncharacterized protein	1.03176
Cc05_g11710	GSCOC_T00021280001	Probable aminotransferase TAT2	1.03158
Cc00_g34080	GSCOC_T00006630001	BTB POZ domain-containing At1g55760	1.03077
Cc04_g07670	GSCOC_T00022599001	Cytochrome c-type biogenesis	1.02997
Cc06_g02760	GSCOC_T00023539001	RING-H2 finger ATL33	1.02996
Cc02_g32200	GSCOC_T00012954001	Uncharacterized protein	1.02985
Cc04_g02280	GSCOC_T00021896001	Agglutinin alpha chain	1.02828
Cc09_g04270	GSCOC_T00017448001	Pentatricopeptide repeat-containing At4g01570	1.02815
Cc04_g09260	GSCOC_T00022809001	Monoglyceride lipase	1.02705
Cc02_g13840	GSCOC_T00029089001	homolog subfamily B member 13	1.02562
Cc03_g03600	GSCOC_T00026053001	Uncharacterized protein C24B11.05	1.0247
Cc05_g06520	GSCOC_T00042143001	Pentatricopeptide repeat-containing At1g73710	1.02272
Cc03_g01450	GSCOC_T00025757001	Ethylene-responsive transcription factor RAP2-3	1.0226
Cc03_g11130	GSCOC_T00042072001	Pentatricopeptide repeat-containing At2g27610	1.02194
Cc00_g11150	GSCOC_T00008682001	Uncharacterized protein	1.02148
Cc10_g12660	GSCOC_T00031985001	translocase subunit chloroplastic	1.02033
Cc10_g06970	GSCOC_T00034589001	UDP-glycosyltransferase 85A2	1.01998
Cc08_g13150	GSCOC_T00030376001	Cytochrome P450 76C2	1.0194
Cc05_g12830	GSCOC_T00021138001	Zinc finger CONSTANS-LIKE 10	1.01909
Cc00_g09200	GSCOC_T00012300001	Cytochrome P450 71A8	1.01888
Cc10_g12670	GSCOC_T00031986001	translocase subunit chloroplastic	1.01774
Cc02_g18140	GSCOC_T00014350001	Proteasome assembly chaperone 2	1.01725
Cc07_g17580	GSCOC_T00018879001	UPF0235 C15orf40 homolog	1.01688
Cc06_g22360	GSCOC_T00017198001	F-box At5g07610	1.01678
Cc04_g06710	GSCOC_T00022466001	DETOXIFICATION 4	1.01644
Cc07_g09480	GSCOC_T00037236001	Uncharacterized protein	1.01643
Cc02_g26020	GSCOC_T00028665001	Uncharacterized protein	1.0156
Cc08_g16970	GSCOC_T00035675001	Granule-bound starch synthase chloroplastic amyloplastic	1.01554
Cc10_g07680	GSCOC_T00034492001	AP2-like ethylene-responsive transcription factor ANT	1.0154
Cc04_g01480	GSCOC_T00021802001	Nuclear transcription factor Y subunit A-3	1.01467
Cc00_g21500	GSCOC_T00008526001	UDP-glucose flavonoid 3-O-glucosyltransferase 6	1.01285
Cc11_g00310	GSCOC_T00019460001	vacuolar sorting-associated 13F	1.01219
Cc02_g17790	GSCOC_T00014307001	Polyol transporter 5	1.01139
Cc07_g07420	GSCOC_T00040091001	Squalene monooxygenase	1.01076
Cc06_g14470	GSCOC_T00041253001	Clustered mitochondria homolog	1.01054
Cc08_g04050	GSCOC_T00034209001	Calcium permeable stress-gated cation channel 1	1.01009
Cc00_g11470	GSCOC_T00001689001	Transcription factor tau subunit sfc4	1.00987
Cc09_g02360	GSCOC_T00017687001	Leucine aminopeptidase 2	1.00985
Cc02_g01370	GSCOC_T00019958001	Nephrocystin-3	1.00978
Cc01_g00420	GSCOC_T00005542001	disease resistance RGA3	1.00972
Cc11_g13020	GSCOC_T00032235001	Uncharacterized protein	1.00854
Cc02_g10870	GSCOC_T00029481001	Zinc finger CCHC-type and RNA-binding motif-containing 1	1.00817
Cc03_g02700	GSCOC_T00025935001	Uncharacterized protein	1.00787
Cc00_g09570	GSCOC_T00007379001	Small subunit processome component 20 homolog	1.00778
Cc00_g33280	GSCOC_T00013700001	Calcium-transporting ATPase plasma membrane-type	1.00679
Cc07_g15480	GSCOC_T00036471001	G-type lectin S-receptor-like serine threonine- kinase RLK1	1.00659
Cc00_g23310	GSCOC_T00002280001	Uncharacterized protein	1.00634
Cc04_g07370	GSCOC_T00022553001	ASPARTIC PROTEASE IN GUARD CELL 1	1.00632
Cc03_g05040	GSCOC_T00026241001	Cellulose synthase G2	1.0055
Cc07_g00130	GSCOC_T00019075001	Uncharacterized protein	1.00497
Cc02_g18350	GSCOC_T00014376001	Uncharacterized protein	1.00495
Cc01_g09080	GSCOC_T00023950001	DNA polymerase epsilon subunit 3	1.00465
Cc10_g00880	GSCOC_T00024548001	Large proline-rich BAG6	1.00464
Cc07_g07960	GSCOC_T00040158001	Uncharacterized protein	1.0046
Cc00_g18820	GSCOC_T00002531001	Hippocampus abundant transcript 1	1.00411
Cc01_g07130	GSCOC_T00030138001	Tyrosine-specific transport	1.00364
Cc09_g10120	GSCOC_T00041089001	Subtilisin-like protease	1.00308
Cc03_g05870	GSCOC_T00026359001	Tetratricopeptide repeat 7B	1.0025
Cc11_g11620	GSCOC_T00032421001	Cytochrome P450 734A1	1.00244
Cc05_g02540	GSCOC_T00020939001	Uncharacterized protein	1.00233
Cc00_g16650	GSCOC_T00009359001	Transcription factor bHLH35	1.00207
Cc10_g11220	GSCOC_T00018468001	UDP-glycosyltransferase 85A5	1.0015
Cc11_g07070	GSCOC_T00018111001	mitochondrial	1.00147
Cc02_g06030	GSCOC_T00039127001	Cytosolic endo-beta-N-acetylglucosaminidase	1.00096
Cc09_g03980	GSCOC_T00017480001	Endoribonuclease Dicer homolog 2	1.00075
Cc08_g15840	GSCOC_T00035528001	Lysine histidine transporter 1	1.00022
Cc07_g01590	GSCOC_T00039332001	glucose-6-phosphate 1-epimerase	0.999574
Cc02_g03860	GSCOC_T00020287001	Cleavage and polyadenylation specificity factor subunit 1	0.999029
Cc00_g01610	GSCOC_T00002721001	Succinate dehydrogenase cytochrome b560 subunit	0.998427
Cc04_g13560	GSCOC_T00018265001	Outer envelope pore chloroplastic	0.995503
Cc09_g09260	GSCOC_T00023074001	60S ribosomal L18a	0.995429
Cc07_g12830	GSCOC_T00036827001	UTP--glucose-1-phosphate uridylyltransferase	0.994881
Cc02_g31520	GSCOC_T00027544001	Polyubiquitin 3	0.994825
Cc00_g17850	GSCOC_T00008901001	UDP-glycosyltransferase 91C1	0.994788
Cc08_g13920	GSCOC_T00030288001	Calcium-dependent kinase 29	0.99406
Cc07_g17960	GSCOC_T00018822001	Ankyrin repeat-containing ITN1	0.993296
Cc03_g08310	GSCOC_T00033235001	Uncharacterized protein	0.992852
Cc06_g07720	GSCOC_T00031224001	Probable anion transporter chloroplastic	0.991741
Cc01_g12870	GSCOC_T00028238001	Outer envelope pore chloroplastic	0.991471
Cc02_g04770	GSCOC_T00020399001	Cytosolic sulfotransferase 5	0.990766
Cc08_g15160	GSCOC_T00035442001	Mitogen-activated kinase 4	0.990757
Cc03_g06470	GSCOC_T00026442001	Uncharacterized protein	0.990451
Cc07_g16240	GSCOC_T00037588001	F-box kelch-repeat SKIP6	0.990243
Cc00_g04540	GSCOC_T00013595001	Indole-3-acetic acid-amido synthetase	0.989772
Cc01_g19130	GSCOC_T00016099001	Sulfate transporter	0.988753
Cc06_g17660	GSCOC_T00040349001	Heat stress transcription factor B-3	0.988639
Cc02_g24830	GSCOC_T00028835001	Uncharacterized protein	0.987529
Cc03_g06280	GSCOC_T00026418001	Pentatricopeptide repeat-containing mitochondrial	0.987445
Cc00_g10970	GSCOC_T00006920001	Disease resistance RPM1	0.987278
Cc10_g13390	GSCOC_T00035299001	Uncharacterized protein	0.986448
Cc02_g03970	GSCOC_T00020299001	STRUBBELIG-RECEPTOR FAMILY 8	0.985444
Cc05_g10090	GSCOC_T00021501001	Probable glutathione S-transferase	0.985352
Cc03_g08210	GSCOC_T00033219001	UPF0481 At3g47200	0.984853
Cc06_g03440	GSCOC_T00023627001	Peroxiredoxin-like 2C	0.983986
Cc05_g07790	GSCOC_T00016782001	Zinc finger NUTCRACKER	0.982961
Cc02_g21610	GSCOC_T00014804001	pumilio homolog chloroplastic	0.982441
Cc07_g01840	GSCOC_T00039361001	Galactinol--sucrose galactosyltransferase	0.981834
Cc07_g01940	GSCOC_T00039372001	Glutaredoxin-C2	0.981139
Cc02_g09530	GSCOC_T00029645001	Pentatricopeptide repeat-containing mitochondrial	0.981122
Cc08_g10070	GSCOC_T00026966001	Zinc finger CCCH domain-containing 20	0.980481
Cc01_g00180	GSCOC_T00012416001	Cytochrome P450 716B2	0.980259
Cc01_g19310	GSCOC_T00016076001	Uncharacterized isomerase BH0283	0.978875
Cc02_g27650	GSCOC_T00025099001	Cathepsin B	0.978517
Cc09_g09770	GSCOC_T00011981001	60S ribosomal L32-1	0.978465
Cc03_g16220	GSCOC_T00002106001	Queuine tRNA-ribosyltransferase accessory subunit 2	0.978464
Cc06_g01620	GSCOC_T00023390001	Laccase-4	0.977231
Cc08_g16300	GSCOC_T00035586001	Uncharacterized protein At5g39865	0.976618
Cc00_g24910	GSCOC_T00006026001	disease resistance RPP13 1	0.975681
Cc02_g25640	GSCOC_T00028723001	invertase inhibitor	0.974541
Cc07_g07540	GSCOC_T00040104001	Homeobox-leucine zipper HAT22	0.974436
Cc00_g19160	GSCOC_T00007968001	late blight resistance homolog R1B-16	0.97367
Cc06_g05590	GSCOC_T00043117001	Solute carrier family 35 member F1	0.970938
Cc02_g27370	GSCOC_T00025067001	Thioredoxin Clot	0.970846
Cc02_g32490	GSCOC_T00001239001	disease resistance RGA3	0.970702
Cc02_g02280	GSCOC_T00020078001	Uncharacterized protein P11E10.01	0.970315
Cc02_g10840	GSCOC_T00029485001	Uncharacterized protein	0.96979
Cc07_g17260	GSCOC_T00037456001	late blight resistance homolog R1A-6	0.969449
Cc05_g11140	GSCOC_T00021353001	Epidermis-specific secreted glyco EP1	0.969011
Cc05_g02950	GSCOC_T00033472001	pentatricopeptide repeat-containing mitochondrial	0.968882
Cc04_g15730	GSCOC_T00042351001	NRT1 PTR FAMILY	0.96803
Cc11_g12280	GSCOC_T00032338001	Pentatricopeptide repeat-containing At5g66520	0.967831
[truncated: 3,453 more rows]

## Sheet: down-regulated
Gene ID	ORF Name	Protein Name	Fold Change
Cc00_g30240	GSCOC_T00008667001	Cysteine ase inhibitor 5	-13.3649
Cc04_g13840	GSCOC_T00035896001	Uncharacterized protein	-11.606
Cc00_g29670	GSCOC_T00005066001	Uncharacterized protein	-11.5454
Cc11_g00400	GSCOC_T00019478001	Uncharacterized protein	-11.083
Cc06_g14770	GSCOC_T00041212001	Uncharacterized protein	-10.9767
Cc00_g17430	GSCOC_T00013477001	Isoflavone reductase homolog P3	-10.7633
Cc05_g05110	GSCOC_T00035063001	Cytochrome P450 71D10	-10.7037
Cc00_g20380	GSCOC_T00002063001	FK506-binding 2	-10.7035
Cc10_g14350	GSCOC_T00012028001	Uncharacterized protein	-10.6655
Cc00_g23750	GSCOC_T00012207001	Uncharacterized protein	-10.4851
Cc10_g04410	GSCOC_T00034938001	Uncharacterized protein	-10.4039
Cc11_g04040	GSCOC_T00034028001	Uncharacterized protein	-10.2823
Cc08_g08870	GSCOC_T00017222001	BURP domain RD22	-10.2584
Cc00_g29880	GSCOC_T00006934001	8-hydroxyquercetin 8-O-methyltransferase	-10.1492
Cc09_g05150	GSCOC_T00007088001	Cytochrome P450 89A2	-10.0987
Cc07_g14720	GSCOC_T00036575001	1-aminocyclopropane-1-carboxylate oxidase 2	-10.0672
Cc00_g06270	GSCOC_T00008047001	Annexin D8	-9.88066
Cc00_g14760	GSCOC_T00010967001	Mitogen-activated kinase kinase 4	-9.83666
Cc03_g14230	GSCOC_T00031817001	Basic endochitinase	-9.73121
Cc11_g08350	GSCOC_T00032887001	Kirola	-9.67898
Cc11_g05490	GSCOC_T00020506001	Macrophage migration inhibitory factor homolog	-9.67419
Cc03_g13740	GSCOC_T00031729001	Polygalacturonase-1 non-catalytic subunit beta	-9.62524
Cc00_g19610	GSCOC_T00004546001	UXT homolog	-9.46158
Cc02_g38970	GSCOC_T00027783001	Uncharacterized protein	-9.45905
Cc08_g04310	GSCOC_T00034251001	Uncharacterized protein	-9.36671
Cc05_g01090	GSCOC_T00000911001	Uncharacterized protein	-9.34253
Cc06_g14780	GSCOC_T00041210001	Uncharacterized protein	-9.33875
Cc04_g16390	GSCOC_T00035731001	(-)-germacrene D synthase	-9.32229
Cc00_g02610	GSCOC_T00006644001	Lupeol synthase	-9.27525
Cc07_g00260	GSCOC_T00019092001	Chlorophyll a-b binding chloroplastic	-9.25937
Cc09_g06990	GSCOC_T00036334001	Probable caffeine synthase 3	-9.11572
Cc11_g08340	GSCOC_T00032888001	Kirola	-9.03074
Cc00_g16430	GSCOC_T00005624001	8-hydroxyquercetin 8-O-methyltransferase	-8.9923
Cc03_g12160	GSCOC_T00015275001	Uncharacterized protein	-8.97882
Cc01_g08270	GSCOC_T00015527001	Alcohol dehydrogenase-like 7	-8.97111
Cc00_g11770	GSCOC_T00003637001	Tabersonine 16-O-methyltransferase	-8.9416
Cc06_g23830	GSCOC_T00040509001	Probable caffeine synthase 3	-8.84211
Cc01_g01320	GSCOC_T00037928001	Plastocyanin	-8.82909
Cc00_g08920	GSCOC_T00008674001	60S ribosomal L24	-8.82684
Cc08_g00370	GSCOC_T00038532001	Uncharacterized protein	-8.76082
Cc00_g02590	GSCOC_T00006642001	Lupeol synthase	-8.69422
Cc08_g06040	GSCOC_T00024418001	Long-chain-alcohol oxidase FAO4A	-8.68074
Cc06_g20490	GSCOC_T00022983001	Uncharacterized acetyltransferase At3g50280	-8.6762
Cc00_g31610	GSCOC_T00012947001	60S ribosomal L7a-1	-8.64797
Cc09_g03130	GSCOC_T00017586001	GDSL esterase lipase At5g33370	-8.6283
Cc11_g04220	GSCOC_T00001335001	polyol transporter 2	-8.58637
Cc01_g09810	GSCOC_T00024050001	Uncharacterized protein	-8.58597
Cc01_g20690	GSCOC_T00015903001	REF SRPP At3g05500	-8.5675
Cc00_g00920	GSCOC_T00041147001	60S ribosomal L31	-8.56348
Cc02_g13400	GSCOC_T00029162001	Lipoxygenase chloroplastic	-8.53144
Cc00_g15990	GSCOC_T00001470001	F-box LRR-repeat At5g02930	-8.50692
Cc06_g21940	GSCOC_T00015608001	NLP2	-8.50521
Cc06_g00090	GSCOC_T00023175001	Two-component response regulator ARR12	-8.50142
Cc10_g14370	GSCOC_T00012032001	F-box kelch-repeat At1g57790	-8.50029
Cc00_g03150	GSCOC_T00003071001	Annexin RJ4	-8.48628
Cc07_g05950	GSCOC_T00039884001	Multidrug and toxin extrusion 1	-8.45346
Cc03_g14650	GSCOC_T00026692001	late blight resistance homolog R1B-17	-8.45163
Cc02_g17310	GSCOC_T00014242001	Probable mitochondrial chaperone bcs1	-8.44673
Cc09_g08160	GSCOC_T00020754001	Alcohol dehydrogenase class-3	-8.44523
Cc05_g02200	GSCOC_T00018420001	ATP-dependent zinc metalloprotease FTSH chloroplastic	-8.42458
Cc06_g00100	GSCOC_T00023176001	Mitotic checkpoint BUB3	-8.40159
Cc07_g18180	GSCOC_T00018785001	Pentatricopeptide repeat-containing chloroplastic	-8.3519
Cc02_g03490	GSCOC_T00020234001	Uncharacterized protein	-8.34324
Cc00_g17890	GSCOC_T00012819001	60S ribosomal L32-1	-8.32025
Cc11_g06110	GSCOC_T00020602001	DETOXIFICATION 6	-8.30727
Cc00_g12360	GSCOC_T00006622001	Fructose-	-8.25485
Cc04_g13850	GSCOC_T00035898001	Cysteine ase inhibitor 1	-8.23715
Cc08_g06230	GSCOC_T00040964001	Glutamate receptor	-8.22556
Cc00_g35650	GSCOC_T00002347001	Uncharacterized protein	-8.19915
Cc10_g00450	GSCOC_T00024495001	8-amino-7-oxononanoate synthase	-8.19713
Cc00_g01740	GSCOC_T00002838001	Uncharacterized protein	-8.1949
Cc08_g04320	GSCOC_T00034252001	Uncharacterized protein	-8.19393
Cc09_g02500	GSCOC_T00017668001	Serine threonine- kinase BSK8	-8.15694
Cc00_g07350	GSCOC_T00006803001	ALA-interacting subunit 2	-8.12553
Cc02_g33850	GSCOC_T00008629001	Small nuclear ribonucleo Sm D3	-8.11353
Cc00_g00430	GSCOC_T00036128001	Serine threonine- kinase fray2	-8.08113
Cc09_g06530	GSCOC_T00005104001	Uncharacterized protein	-8.07979
Cc09_g04810	GSCOC_T00017378001	Apyrase	-8.06142
Cc04_g06680	GSCOC_T00022463001	Probable S-adenosylmethionine-dependent methyltransferase At5g37990	-8.05674
Cc06_g23400	GSCOC_T00040579001	WD repeat-containing 76	-8.05193
Cc03_g02310	GSCOC_T00025872001	Uncharacterized protein	-8.04008
Cc00_g16020	GSCOC_T00009614001	late blight resistance homolog R1B-17	-8.03524
Cc06_g23820	GSCOC_T00040514001	Lupeol synthase	-8.02377
Cc00_g26370	GSCOC_T00002364001	amidase	-8.02151
Cc02_g16490	GSCOC_T00014141001	Uncharacterized protein	-8.00925
Cc06_g18010	GSCOC_T00040401001	Catalase-1	-8.00328
Cc11_g06750	GSCOC_T00020700001	Uncharacterized protein	-7.9875
Cc10_g03260	GSCOC_T00024849001	Uncharacterized protein	-7.97997
Cc06_g06080	GSCOC_T00043179001	Beta- insoluble isoenzyme 1	-7.95532
Cc09_g08560	GSCOC_T00020826001	Disease resistance RPM1	-7.94544
Cc00_g02070	GSCOC_T00001840001	Disease resistance RPS5	-7.94299
Cc09_g05070	GSCOC_T00007080001	Cationic amino acid transporter 5	-7.93127
Cc10_g11450	GSCOC_T00013664001	Gibberellin-regulated 9	-7.92907
Cc11_g06160	GSCOC_T00020610001	DETOXIFICATION 6	-7.92636
Cc11_g01750	GSCOC_T00019522001	Cytochrome P450 76C4	-7.88735
Cc01_g01310	GSCOC_T00037929001	Plastocyanin chloroplastic	-7.88428
Cc04_g13380	GSCOC_T00018297001	UDP-glycosyltransferase 74E2	-7.87952
Cc04_g03310	GSCOC_T00022024001	Uncharacterized protein	-7.87853
Cc02_g28880	GSCOC_T00018186001	Uncharacterized protein	-7.87697
Cc04_g04860	GSCOC_T00022225001	Uncharacterized protein	-7.86898
Cc07_g14930	GSCOC_T00036551001	UDP-glycosyltransferase 85A2	-7.85995
Cc00_g05460	GSCOC_T00000304001	Pathogenesis-related 5	-7.82718
Cc00_g02600	GSCOC_T00006643001	Lupeol synthase	-7.82305
Cc07_g16340	GSCOC_T00037573001	B3 domain-containing REM9	-7.8155
Cc02_g36120	GSCOC_T00006316001	Nascent polypeptide-associated complex subunit alpha	-7.81132
Cc01_g04510	GSCOC_T00041173001	Probable feruloyl esterase A	-7.8035
Cc10_g11790	GSCOC_T00031855001	60S ribosomal L9	-7.79818
Cc03_g05110	GSCOC_T00026254001	1-aminocyclopropane-1-carboxylate oxidase homolog 12	-7.79235
Cc11_g08430	GSCOC_T00032876001	Uncharacterized protein	-7.7753
Cc07_g09760	GSCOC_T00037200001	Isoflavone reductase homolog	-7.74817
Cc01_g00700	GSCOC_T00011056001	Uncharacterized protein	-7.74492
Cc00_g00440	GSCOC_T00036129001	Sister chromatid cohesion PDS5 homolog A	-7.71535
Cc00_g00220	GSCOC_T00036099001	B3 domain-containing REM21	-7.71333
Cc06_g13650	GSCOC_T00041366001	Mitogen-activated kinase kinase 4	-7.68448
Cc00_g26360	GSCOC_T00002363001	S-norcoclaurine synthase	-7.65885
Cc07_g06040	GSCOC_T00039896001	Lipase	-7.65477
Cc00_g33670	GSCOC_T00002236001	Uncharacterized protein	-7.64345
Cc06_g17980	GSCOC_T00040395001	Uncharacterized protein	-7.60848
Cc06_g14370	GSCOC_T00041265001	Uncharacterized protein	-7.60374
Cc00_g14810	GSCOC_T00006681001	Glutamate dehydrogenase B	-7.59358
Cc00_g18670	GSCOC_T00013357001	Serine threonine- kinase fray2	-7.56374
Cc00_g07310	GSCOC_T00000204001	Somatic embryogenesis receptor kinase 1	-7.49168
Cc00_g25050	GSCOC_T00004661001	NLP7	-7.48582
Cc01_g16920	GSCOC_T00016386001	Uncharacterized protein	-7.48348
Cc08_g07760	GSCOC_T00011868001	Tetratricopeptide repeat 7A	-7.46333
Cc11_g01600	GSCOC_T00019542001	Probable LRR receptor-like serine threonine- kinase At3g47570	-7.45381
Cc05_g13970	GSCOC_T00020991001	farnesyltransferase geranylgeranyltransferase type-1 subunit alpha	-7.44119
Cc02_g14190	GSCOC_T00013821001	UDP-glycosyltransferase 79B6	-7.43573
Cc03_g13910	GSCOC_T00031760001	Lupeol synthase	-7.4231
Cc03_g13510	GSCOC_T00018980001	Auxin response factor 2	-7.41456
Cc06_g04610	GSCOC_T00042973001	Thaumatin 1	-7.38672
Cc10_g00790	GSCOC_T00024538001	Uncharacterized protein	-7.38569
Cc01_g02580	GSCOC_T00009678001	Uncharacterized protein	-7.37968
Cc02_g14280	GSCOC_T00013835001	GDSL esterase lipase At5g45950	-7.36583
Cc00_g16670	GSCOC_T00000900001	S-norcoclaurine synthase	-7.35047
Cc01_g05310	GSCOC_T00011440001	Prohibitin- mitochondrial	-7.33709
Cc00_g01300	GSCOC_T00010923001	F-box CPR1	-7.31437
Cc04_g16400	GSCOC_T00035735001	(-)-germacrene D synthase	-7.29427
Cc08_g14560	GSCOC_T00030207001	Glutathione S-transferase T2	-7.28417
Cc03_g07340	GSCOC_T00026583001	Probable caffeine synthase 3	-7.24288
Cc08_g12020	GSCOC_T00030539001	Subtilisin-like protease	-7.20553
Cc07_g02560	GSCOC_T00039454001	Gibberellin-regulated 14	-7.19393
Cc00_g07890	GSCOC_T00000466001	Uncharacterized protein	-7.18223
Cc00_g01500	GSCOC_T00010663001	Stem-specific TSJT1	-7.17371
Cc00_g13270	GSCOC_T00011541001	Esterase PIR7B	-7.17107
Cc10_g05350	GSCOC_T00034820001	Isoflavone 2 -hydroxylase	-7.15954
Cc10_g15990	GSCOC_T00033804001	Eukaryotic translation initiation factor 3 subunit I	-7.14705
Cc00_g24060	GSCOC_T00009222001	BURP domain RD22	-7.14679
Cc00_g16300	GSCOC_T00008241001	late blight resistance homolog R1A-6	-7.14493
Cc10_g16410	GSCOC_T00013397001	Uncharacterized protein	-7.14043
Cc00_g17200	GSCOC_T00009145001	Beta-amylase chloroplastic	-7.1302
Cc02_g25030	GSCOC_T00028809001	Plasma membrane ATPase 1	-7.10709
Cc00_g29680	GSCOC_T00006763001	29 kDa ribonucleo chloroplastic	-7.09638
Cc09_g08450	GSCOC_T00020806001	Tyrosine DOPA decarboxylase 1	-7.07738
Cc00_g28460	GSCOC_T00008180001	Uncharacterized protein	-7.07345
Cc00_g21670	GSCOC_T00011702001	Elongation factor 1-alpha	-7.06776
Cc11_g10390	GSCOC_T00032584001	Probable aquaporin PIP-type 7a	-7.055
Cc04_g11000	GSCOC_T00008919001	Beta-	-7.05323
Cc07_g11590	GSCOC_T00036985001	DETOXIFICATION chloroplastic	-7.03023
Cc04_g04210	GSCOC_T00022143001	Signal peptidase complex catalytic subunit SEC11C	-7.0282
Cc07_g19960	GSCOC_T00033905001	Secologanin synthase	-7.02192
Cc00_g03100	GSCOC_T00003065001	NEP1-interacting -like 1	-7.01514
Cc02_g29770	GSCOC_T00038878001	Uncharacterized protein	-7.01244
Cc07_g03400	GSCOC_T00039569001	Uncharacterized protein	-7.00457
Cc00_g32510	GSCOC_T00010420001	Beta-glucosidase 10	-6.99596
Cc00_g06350	GSCOC_T00004108001	F-box LRR-repeat MAX2 homolog	-6.99445
Cc04_g13390	GSCOC_T00018295001	Uncharacterized protein	-6.97329
Cc04_g04770	GSCOC_T00022213001	UPF0481 At3g02645	-6.96737
Cc02_g30170	GSCOC_T00038977001	Mpv17	-6.94585
Cc00_g34310	GSCOC_T00012888001	Beta-glucosidase 27	-6.93003
Cc02_g21460	GSCOC_T00014787001	Midasin	-6.9184
Cc02_g21110	GSCOC_T00014747001	Leucoanthocyanidin dioxygenase	-6.91526
Cc09_g07920	GSCOC_T00003778001	Glutathione S-transferase U15	-6.89425
Cc00_g30960	GSCOC_T00007567001	Uncharacterized protein	-6.88998
Cc11_g01160	GSCOC_T00019618001	late blight resistance homolog R1B-13	-6.87499
Cc03_g08280	GSCOC_T00033229001	Uncharacterized protein	-6.86454
Cc10_g14640	GSCOC_T00033608001	Uncharacterized protein	-6.86094
Cc06_g17970	GSCOC_T00040394001	Uncharacterized protein	-6.85371
Cc00_g32590	GSCOC_T00011519001	Uncharacterized protein	-6.81875
Cc02_g34100	GSCOC_T00000645001	Transcription factor bHLH19	-6.81629
Cc00_g00740	GSCOC_T00036186001	NADPH-dependent oxidoreductase 2-alkenal reductase	-6.81034
Cc00_g15750	GSCOC_T00000083001	Small ubiquitin-related modifier 2	-6.80465
Cc06_g20590	GSCOC_T00023003001	Uncharacterized protein	-6.79998
Cc05_g08000	GSCOC_T00016806001	Transcription factor VIP1	-6.78747
Cc09_g07000	GSCOC_T00036333001	Theobromine synthase 2	-6.78569
Cc00_g27970	GSCOC_T00001314001	40S ribosomal S14-3	-6.7768
Cc00_g26150	GSCOC_T00004175001	BURP domain RD22	-6.77029
Cc00_g06370	GSCOC_T00004112001	Premnaspirodiene oxygenase	-6.7583
Cc03_g07140	GSCOC_T00026554001	ROOT HAIR DEFECTIVE 3 homolog 1	-6.75578
Cc04_g15660	GSCOC_T00042342001	Momilactone A synthase	-6.74998
Cc00_g12380	GSCOC_T00013523001	Flavanone 7-O-glucoside 2 -O-beta-L-rhamnosyltransferase	-6.73008
Cc00_g06300	GSCOC_T00008051001	Annexin D8	-6.7142
Cc07_g18460	GSCOC_T00018751001	Uncharacterized protein	-6.70688
Cc02_g16160	GSCOC_T00014093001	GDSL esterase lipase At1g29670	-6.70581
Cc02_g31800	GSCOC_T00027489001	Synaptonemal complex 1	-6.69561
Cc08_g10750	GSCOC_T00027052001	Beta- insoluble isoenzyme CWINV3	-6.69335
Cc07_g06570	GSCOC_T00039972001	Xyloglucan galactosyltransferase KATAMARI1 homolog	-6.69252
Cc07_g13830	GSCOC_T00036691001	Probable pectate lyase 15	-6.67449
Cc03_g04740	GSCOC_T00026202001	Magnesium transporter MRS2-I	-6.67097
Cc03_g15610	GSCOC_T00026851001	NADPH-dependent oxidoreductase 2-alkenal reductase	-6.65612
Cc00_g32630	GSCOC_T00000079001	Probable LRR receptor-like serine threonine- kinase At3g47570	-6.62829
Cc06_g14170	GSCOC_T00041292001	HD domain-containing 2	-6.61935
Cc00_g06030	GSCOC_T00000131001	Uncharacterized protein	-6.61346
Cc06_g01030	GSCOC_T00023309001	UPF0098 MTH_273	-6.59315
Cc06_g14350	GSCOC_T00041268001	Uncharacterized protein	-6.58967
Cc00_g27580	GSCOC_T00003716001	Ubiquitin-60S ribosomal L40	-6.5583
Cc05_g06230	GSCOC_T00042105001	Dynamin-related 1A	-6.55083
Cc03_g08980	GSCOC_T00042734001	Uncharacterized protein	-6.52746
Cc05_g02070	GSCOC_T00040805001	Monothiol glutaredoxin- mitochondrial	-6.51726
Cc03_g13890	GSCOC_T00031758001	Lupeol synthase	-6.51142
Cc04_g03300	GSCOC_T00022023001	Acid phosphatase 1	-6.50943
Cc03_g14350	GSCOC_T00031834001	Stearoyl	-6.47429
Cc11_g11580	GSCOC_T00032426001	Cytosolic sulfotransferase 12	-6.47362
Cc02_g22100	GSCOC_T00014870001	Uncharacterized protein	-6.46628
Cc11_g00800	GSCOC_T00019749001	RING-box 1a	-6.45786
Cc07_g17760	GSCOC_T00018853001	G-type lectin S-receptor-like serine threonine- kinase RLK1	-6.45499
Cc09_g04840	GSCOC_T00017372001	Probable inorganic phosphate transporter 1-8	-6.45237
Cc11_g00460	GSCOC_T00019488001	Acidic endochitinase	-6.4442
Cc01_g20560	GSCOC_T00015918001	Wee1 kinase	-6.4435
Cc11_g06510	GSCOC_T00020667001	Uncharacterized protein	-6.43546
Cc08_g05350	GSCOC_T00024295001	ROOT HAIR DEFECTIVE 3	-6.42999
Cc04_g07320	GSCOC_T00022543001	F-box LRR-repeat At3g59200	-6.42727
Cc09_g07530	GSCOC_T00036244001	Uncharacterized protein	-6.41283
Cc02_g10170	GSCOC_T00029558001	Synaptonemal complex 1	-6.40913
Cc05_g02990	GSCOC_T00033479001	Uncharacterized protein	-6.40456
Cc03_g10150	GSCOC_T00031018001	REF SRPP At3g05500	-6.40383
Cc00_g28210	GSCOC_T00005957001	Indole-3-glycerol phosphate chloroplastic	-6.38429
Cc00_g06280	GSCOC_T00008048001	Annexin D8	-6.38076
Cc11_g02660	GSCOC_T00025550001	Probable LRR receptor-like serine threonine- kinase At3g47570	-6.37818
Cc11_g02250	GSCOC_T00033003001	F-box FBD LRR-repeat At5g22670	-6.37674
Cc03_g08290	GSCOC_T00033230001	late blight resistance homolog R1B-14	-6.37104
Cc00_g28710	GSCOC_T00011510001	Uncharacterized protein	-6.36905
Cc03_g04320	GSCOC_T00026142001	Perakine reductase	-6.36351
Cc00_g22900	GSCOC_T00010339001	Tetratricopeptide repeat 1	-6.34575
Cc02_g26740	GSCOC_T00024977001	Beta-hexosaminidase	-6.33709
Cc06_g20880	GSCOC_T00015854001	Uncharacterized protein	-6.31647
Cc03_g14850	GSCOC_T00026728001	disease resistance RGA4	-6.29128
Cc11_g05580	GSCOC_T00020516001	UDP-glycosyltransferase 83A1	-6.28829
Cc09_g05950	GSCOC_T00033382001	Wall-associated receptor kinase-like 1	-6.27928
Cc00_g19570	GSCOC_T00008845001	Cytochrome P450 76C4	-6.2732
Cc02_g14260	GSCOC_T00013833001	GDSL esterase lipase At5g45960	-6.25716
Cc06_g16300	GSCOC_T00030712001	Polygalacturonase inhibitor	-6.2446
Cc03_g08590	GSCOC_T00033286001	Uncharacterized protein	-6.23397
Cc08_g06900	GSCOC_T00025237001	Uncharacterized protein	-6.21458
Cc11_g00440	GSCOC_T00019484001	Uncharacterized protein	-6.21186
Cc08_g08440	GSCOC_T00009035001	BURP domain RD22	-6.21069
Cc10_g11500	GSCOC_T00013674001	Gibberellin-regulated 9	-6.2087
Cc01_g08100	GSCOC_T00015499001	Replication A 70 kDa DNA-binding subunit	-6.20238
Cc07_g20400	GSCOC_T00015691001	Uncharacterized protein	-6.20051
Cc10_g09900	GSCOC_T00031486001	AC transposase	-6.19514
Cc00_g11910	GSCOC_T00012631001	Cytochrome P450 87A3	-6.19345
Cc05_g07850	GSCOC_T00016789001	Tabersonine 16-O-methyltransferase	-6.18223
Cc06_g23120	GSCOC_T00040622001	Uncharacterized protein	-6.1685
Cc06_g15970	GSCOC_T00030751001	18 kDa seed maturation	-6.16845
Cc00_g25910	GSCOC_T00006243001	Glucan endo-	-6.15527
Cc04_g12510	GSCOC_T00005314001	Disease resistance response 206	-6.15496
Cc03_g03630	GSCOC_T00026058001	Primary amine oxidase (Fragment)	-6.1509
Cc01_g04000	GSCOC_T00040857001	V-type proton ATPase 16 kDa proteolipid subunit	-6.14539
Cc11_g07450	GSCOC_T00018052001	Acetyl-coenzyme A chloroplastic glyoxysomal	-6.13788
Cc00_g06290	GSCOC_T00008050001	Annexin D7	-6.13539
Cc04_g00330	GSCOC_T00021637001	Calcium-transporting ATPase plasma membrane-type	-6.12911
Cc07_g17740	GSCOC_T00018858001	G-type lectin S-receptor-like serine threonine- kinase RLK1	-6.11154
Cc04_g14780	GSCOC_T00040755001	Germin subfamily T member 1	-6.10755
Cc02_g28380	GSCOC_T00025216001	Uncharacterized protein	-6.09714
Cc05_g03490	GSCOC_T00033568001	Stromal cell-derived factor 2	-6.09638
Cc07_g21090	GSCOC_T00027220001	Small nuclear ribonucleo Sm D3	-6.09638
Cc00_g33680	GSCOC_T00002237001	Uncharacterized protein	-6.09316
Cc05_g03130	GSCOC_T00033505001	Endoglucanase 11	-6.0902
Cc00_g07740	GSCOC_T00003351001	Uncharacterized protein	-6.08953
Cc02_g03420	GSCOC_T00020226001	Ethylene-responsive transcription factor ERF025	-6.08436
Cc02_g38880	GSCOC_T00027797001	GDSL esterase lipase At4g01130	-6.0773
Cc07_g15180	GSCOC_T00036509001	Uncharacterized protein	-6.07565
Cc00_g16210	GSCOC_T00013153001	Uncharacterized protein	-6.07475
Cc00_g33580	GSCOC_T00000563001	Uncharacterized protein	-6.07475
Cc06_g17470	GSCOC_T00036403001	Uncharacterized protein	-6.06076
Cc08_g03930	GSCOC_T00034192001	Cytochrome P450 76C4	-6.06076
Cc01_g06190	GSCOC_T00027457001	Probable LRR receptor-like serine threonine- kinase At5g63710	-6.05373
Cc11_g03850	GSCOC_T00033994001	Stem-specific TSJT1	-6.04929
Cc03_g03610	GSCOC_T00026054001	Polyamine aminopropyltransferase	-6.04268
Cc04_g15220	GSCOC_T00006570001	MDIS1-interacting receptor like kinase 2	-6.04213
Cc00_g06020	GSCOC_T00000130001	Serine threonine- kinase 38	-6.03941
Cc00_g14380	GSCOC_T00010681001	Uncharacterized protein	-6.03855
Cc01_g10780	GSCOC_T00024185001	ABC transporter G family member 28	-6.03498
Cc02_g27160	GSCOC_T00025036001	Vicianin hydrolase (Fragment)	-6.02522
Cc01_g18860	GSCOC_T00016144001	Auxin-induced 22D	-6.02423
Cc04_g07530	GSCOC_T00022577001	Uncharacterized protein	-6.02423
Cc04_g13410	GSCOC_T00018292001	Uncharacterized protein	-6.02037
Cc11_g11450	GSCOC_T00032444001	Uncharacterized protein	-6.00963
Cc03_g14890	GSCOC_T00026735001	disease resistance RGA4	-6.00159
Cc11_g06520	GSCOC_T00020669001	LRR receptor-like serine threonine- kinase ERL1	-5.99836
Cc07_g06310	GSCOC_T00039932001	1-aminocyclopropane-1-carboxylate oxidase 1	-5.99779
Cc04_g01540	GSCOC_T00021809001	lipid-transfer DIR1	-5.99412
Cc06_g21820	GSCOC_T00015581001	NLP7	-5.98892
Cc00_g11070	GSCOC_T00000146001	Secologanin synthase	-5.98674
Cc01_g03100	GSCOC_T00019030001	Secologanin synthase	-5.98674
Cc07_g20820	GSCOC_T00027274001	Uncharacterized protein	-5.97614
Cc10_g06550	GSCOC_T00034639001	DETOXIFICATION 41	-5.95663
Cc05_g03870	GSCOC_T00017319001	Cysteine-rich receptor kinase 10	-5.95584
Cc07_g18740	GSCOC_T00018705001	Probable S-adenosylmethionine-dependent methyltransferase At5g37990	-5.94821
Cc02_g14160	GSCOC_T00013817001	Bifunctional epoxide hydrolase 2	-5.94724
Cc06_g21990	GSCOC_T00015614001	NLP8	-5.94385
Cc02_g26660	GSCOC_T00024966001	Uncharacterized membrane	-5.92926
Cc11_g02030	GSCOC_T00033037001	Uncharacterized protein	-5.92811
Cc00_g19260	GSCOC_T00011841001	Beta-amylase	-5.92337
Cc09_g04330	GSCOC_T00017440001	Uncharacterized protein	-5.90979
Cc00_g11870	GSCOC_T00001475001	Cytochrome P450 87A3	-5.90374
Cc07_g20350	GSCOC_T00015679001	Uncharacterized protein	-5.89196
Cc00_g14820	GSCOC_T00006682001	Glutamate dehydrogenase	-5.888
Cc04_g14120	GSCOC_T00035939001	Uncharacterized exonuclease domain-containing At3g15140	-5.88401
Cc01_g07390	GSCOC_T00030175001	Alcohol dehydrogenase-like 7	-5.88295
Cc00_g15540	GSCOC_T00004033001	60S ribosomal L8-3	-5.87594
Cc04_g13150	GSCOC_T00018885001	40S ribosomal S10-2	-5.87498
Cc06_g06050	GSCOC_T00043176001	Uncharacterized protein	-5.87407
Cc07_g03390	GSCOC_T00039568001	Aquaporin NIP2-1	-5.87097
Cc09_g08680	GSCOC_T00020845001	UDP-glucose flavonoid 3-O-glucosyltransferase 3	-5.85498
Cc00_g18520	GSCOC_T00008821001	Cytochrome P450 71A2	-5.85178
Cc02_g03320	GSCOC_T00020211001	Probable methyltransferase PMT16	-5.84851
Cc11_g05340	GSCOC_T00020480001	UDP-glycosyltransferase 74E1	-5.847
Cc01_g08910	GSCOC_T00023929001	Uncharacterized protein	-5.84122
Cc00_g18330	GSCOC_T00001115001	Uncharacterized protein	-5.83745
Cc06_g19020	GSCOC_T00028944001	NADPH-dependent oxidoreductase 2-alkenal reductase	-5.82852
Cc06_g22610	GSCOC_T00011692001	Cyanidin-3-O-glucoside 2-O-glucuronosyltransferase	-5.81682
Cc11_g06480	GSCOC_T00020664001	Uncharacterized protein	-5.79967
Cc11_g03940	GSCOC_T00034003001	Uncharacterized hydrolase	-5.79893
Cc05_g07740	GSCOC_T00016773001	Uncharacterized protein	-5.79706
Cc02_g02390	GSCOC_T00020093001	UDP-N-acetylmuramate--L-alanine ligase	-5.79471
Cc11_g06910	GSCOC_T00020724001	Late blight resistance R1-A	-5.79471
Cc05_g06220	GSCOC_T00042104001	Dynamin-related 1C	-5.78162
Cc10_g01510	GSCOC_T00024623001	DEAD-box ATP-dependent RNA helicase 28	-5.77339
Cc00_g26250	GSCOC_T00007871001	Uncharacterized protein	-5.76125
Cc10_g15000	GSCOC_T00033662001	MDIS1-interacting receptor like kinase 2	-5.75955
Cc10_g13660	GSCOC_T00035253001	Uncharacterized protein	-5.75935
Cc09_g05570	GSCOC_T00033447001	Uncharacterized protein	-5.75502
Cc10_g04430	GSCOC_T00034935001	Patatin group A-3	-5.75492
Cc11_g06140	GSCOC_T00020608001	Flavanone 7-O-glucoside 2 -O-beta-L-rhamnosyltransferase	-5.71865
Cc11_g00930	GSCOC_T00019676001	Peptidyl-prolyl cis-trans isomerase FKBP17- chloroplastic	-5.71673
Cc02_g04390	GSCOC_T00020350001	Ubiquitin-activating enzyme E1 2	-5.71459
Cc11_g02460	GSCOC_T00018499001	40S ribosomal S4	-5.70814
Cc07_g18140	GSCOC_T00018794001	Cell wall vacuolar inhibitor of fructosidase 2	-5.70524
Cc02_g33320	GSCOC_T00015359001	Probable linoleate 9S-lipoxygenase 5	-5.70426
Cc03_g13590	GSCOC_T00018997001	Uncharacterized protein	-5.70425
Cc09_g01950	GSCOC_T00017742001	Cytochrome P450 77A3	-5.70209
Cc06_g21330	GSCOC_T00018131001	Cyclin-dependent kinase G-2	-5.69505
Cc00_g25570	GSCOC_T00001882001	3-hydroxyisobutyryl- hydrolase 1	-5.68591
Cc07_g17310	GSCOC_T00037447001	Auxin-induced 5NG4	-5.65456
Cc11_g00990	GSCOC_T00019668001	Uncharacterized protein	-5.65356
Cc00_g05760	GSCOC_T00007673001	BTB POZ domain-containing At3g56230	-5.64774
Cc06_g20540	GSCOC_T00022994001	LOB domain-containing 22	-5.62892
Cc00_g19180	GSCOC_T00011011001	Probable LRR receptor-like serine threonine- kinase At3g47570	-5.60372
Cc05_g04680	GSCOC_T00007009001	L-ascorbate oxidase homolog	-5.59851
Cc10_g05460	GSCOC_T00034803001	Snakin-1	-5.59838
Cc11_g02650	GSCOC_T00025552001	Probable LRR receptor-like serine threonine- kinase At3g47570	-5.59405
Cc06_g12970	GSCOC_T00041467001	Probable LRR receptor-like serine threonine- kinase At1g56140	-5.57794
Cc00_g12070	GSCOC_T00002445001	nuclease HARBI1	-5.57434
Cc08_g05700	GSCOC_T00024358001	Uncharacterized protein	-5.57326
Cc06_g22430	GSCOC_T00005212001	Cytochrome P450 71A1	-5.55981
Cc03_g12640	GSCOC_T00015189001	Uncharacterized protein	-5.55831
Cc00_g06380	GSCOC_T00004113001	Vetispiradiene synthase 1	-5.55541
Cc08_g06460	GSCOC_T00036035001	60S ribosomal L17	-5.53827
Cc00_g20000	GSCOC_T00008213001	ABC transporter G family member 8	-5.52505
Cc08_g05070	GSCOC_T00042452001	Uncharacterized protein	-5.50993
Cc00_g27850	GSCOC_T00009140001	LRR receptor-like serine threonine- kinase EFR	-5.50628
Cc02_g28840	GSCOC_T00018180001	Serine carboxypeptidase-like 40	-5.50628
Cc03_g10080	GSCOC_T00031009001	Major allergen Pru ar 1	-5.50628
Cc00_g00370	GSCOC_T00036120001	Origin of replication complex subunit 2	-5.50112
Cc00_g23470	GSCOC_T00007334001	Beta-xylosidase alpha-L-arabinofuranosidase 1 (Fragment)	-5.50112
Cc01_g01510	GSCOC_T00037897001	F-box FBD LRR-repeat At5g22670	-5.49771
Cc08_g07750	GSCOC_T00011866001	Uncharacterized protein	-5.49305
Cc11_g02670	GSCOC_T00025549001	Probable LRR receptor-like serine threonine- kinase At3g47570	-5.49239
Cc11_g00920	GSCOC_T00019678001	Zinc finger ZPR1	-5.4907
Cc06_g03990	GSCOC_T00023700001	Uncharacterized protein	-5.48541
Cc06_g08440	GSCOC_T00031132001	Ethylene-responsive transcription factor SHINE 2	-5.48252
Cc03_g08970	GSCOC_T00042735001	26S proteasome non-ATPase regulatory subunit 1	-5.46827
Cc06_g23810	GSCOC_T00040517001	Lupeol synthase	-5.46827
Cc11_g05370	GSCOC_T00020487001	late blight resistance homolog R1B-16	-5.46827
Cc10_g08880	GSCOC_T00034328001	Uncharacterized protein	-5.46537
Cc02_g16030	GSCOC_T00014078001	Probable LRR receptor-like serine threonine- kinase At3g47570	-5.46162
Cc00_g13500	GSCOC_T00009968001	ELMO domain-containing A	-5.4523
Cc05_g02560	GSCOC_T00020936001	N-acetylglucosaminyl-phosphatidylinositol de-N-acetylase	-5.4523
Cc00_g15120	GSCOC_T00000075001	Uncharacterized protein	-5.44692
Cc08_g17100	GSCOC_T00035696001	Auxin-induced 5NG4	-5.44692
Cc10_g02170	GSCOC_T00024715001	S-type anion channel SLAH1	-5.43878
Cc04_g04090	GSCOC_T00022127001	Uncharacterized protein	-5.43657
Cc05_g02650	GSCOC_T00020911001	Uncharacterized protein	-5.43475
Cc11_g06500	GSCOC_T00020666001	Receptor 12	-5.4345
Cc06_g16620	GSCOC_T00030659001	Adenylosuccinate synthetase chloroplastic	-5.42379
Cc00_g34620	GSCOC_T00004686001	Annexin D8	-5.41831
Cc07_g18150	GSCOC_T00018792001	Alcohol dehydrogenase 2	-5.41831
Cc08_g11740	GSCOC_T00027180001	Phytoene chloroplastic	-5.41831
Cc09_g07110	GSCOC_T00036313001	Dammarenediol II synthase	-5.41037
Cc00_g22100	GSCOC_T00007466001	COP9 signalosome complex subunit 7	-5.40732
Cc02_g04910	GSCOC_T00038982001	Pectinesterase PPME1	-5.40732
Cc05_g04230	GSCOC_T00031627001	YIPF1 homolog	-5.40732
Cc02_g03430	GSCOC_T00020227001	Dehydration-responsive element-binding 1B	-5.40193
Cc00_g06010	GSCOC_T00000129001	Insulin-degrading enzyme-like peroxisomal	-5.39912
Cc00_g08810	GSCOC_T00011513001		-5.39618
Cc05_g02790	GSCOC_T00020886001	Uncharacterized protein	-5.39618
Cc07_g20640	GSCOC_T00007214001	Extradiol ring-cleavage dioxygenase	-5.39618
Cc10_g12570	GSCOC_T00031975001	Uncharacterized protein	-5.39618
Cc06_g23160	GSCOC_T00040611001	Probable disease resistance At1g58390	-5.39487
Cc10_g11200	GSCOC_T00018465001	Uncharacterized protein	-5.38357
Cc02_g29500	GSCOC_T00018383001	(-)-germacrene D synthase	-5.37224
Cc04_g14660	GSCOC_T00040726001	ribonuclease H At1g65750	-5.36665
Cc00_g00330	GSCOC_T00036114001	Flavin-containing monooxygenase FMO GS-OX-like 5	-5.36031
Cc01_g18410	GSCOC_T00016208001	Hyoscyamine 6-dioxygenase	-5.35169
Cc04_g10680	GSCOC_T00042636001	WUSCHEL-related homeobox 8	-5.34823
Cc02_g15300	GSCOC_T00013973001	Probable LRR receptor-like serine threonine- kinase At3g47570	-5.34432
Cc04_g12520	GSCOC_T00005315001	Uncharacterized protein	-5.33936
Cc03_g01360	GSCOC_T00025746001	Uncharacterized protein	-5.33014
Cc10_g15240	GSCOC_T00033697001	UDP-xylose transporter 3	-5.32352
Cc03_g14580	GSCOC_T00026676001	disease resistance RGA4	-5.32311
Cc11_g04950	GSCOC_T00020422001	Disease resistance RPM1	-5.32284
Cc06_g08260	GSCOC_T00031153001	Umecyanin	-5.31736
Cc07_g17730	GSCOC_T00018859001	G-type lectin S-receptor-like serine threonine- kinase RLK1	-5.30552
Cc04_g16990	GSCOC_T00035821001	Pectinesterase 1	-5.30228
Cc01_g03240	GSCOC_T00033146001	disease resistance RGA3	-5.30104
Cc04_g15860	GSCOC_T00042373001	Uncharacterized protein	-5.29842
Cc02_g31550	GSCOC_T00027540001	Uncharacterized protein	-5.29377
Cc00_g26530	GSCOC_T00011740001	Probable LRR receptor-like serine threonine- kinase At3g47570	-5.29317
Cc09_g04830	GSCOC_T00017375001	Probable inorganic phosphate transporter 1-8	-5.29035
Cc03_g13420	GSCOC_T00018964001	Uncharacterized protein	-5.28314
Cc08_g11900	GSCOC_T00030557001	Oleosin 16 kDa	-5.27685
Cc02_g32390	GSCOC_T00012983001	Uncharacterized protein	-5.27625
Cc09_g09650	GSCOC_T00004086001	Uncharacterized protein	-5.27544
Cc11_g03970	GSCOC_T00034011001	Uncharacterized protein	-5.27544
Cc06_g20630	GSCOC_T00023011001	Importin subunit alpha-1a	-5.25734
Cc01_g07050	GSCOC_T00030125001	Uncharacterized protein	-5.25446
Cc05_g01580	GSCOC_T00018254001	Endo-	-5.251
Cc10_g04570	GSCOC_T00034919001	Probable carboxylesterase 12	-5.2448
Cc00_g34430	GSCOC_T00000732001	Probable LRR receptor-like serine threonine- kinase At3g47570	-5.23854
Cc01_g03860	GSCOC_T00040906001	Flavonol synthase flavanone 3-hydroxylase	-5.23854
Cc01_g09500	GSCOC_T00024004001	Cytochrome P450 94A1	-5.23744
Cc01_g02600	GSCOC_T00009676001	Disease resistance RGA2	-5.22661
Cc00_g02870	GSCOC_T00004307001	Probable E3 ubiquitin- ligase ARI2	-5.2245
Cc03_g14550	GSCOC_T00026673001	Uncharacterized protein	-5.2245
Cc06_g09270	GSCOC_T00041935001	Non-specific lipid transfer GPI-anchored 1	-5.2245
Cc00_g14660	GSCOC_T00008133001	Prohibitin- mitochondrial	-5.21818
Cc11_g06170	GSCOC_T00020614001	DETOXIFICATION 6	-5.21818
Cc10_g13450	GSCOC_T00035291001	Uncharacterized protein	-5.21765
Cc03_g01290	GSCOC_T00025735001	Major allergen Pru ar 1	-5.2159
Cc00_g02740	GSCOC_T00006667001	Uncharacterized protein	-5.21186
Cc03_g13880	GSCOC_T00031757001	Lupeol synthase	-5.21186
Cc00_g02760	GSCOC_T00006674001	Glutamate receptor	-5.19916
Cc02_g02290	GSCOC_T00020080001	DNA-directed primase polymerase	-5.19017
Cc11_g00530	GSCOC_T00007406001	Uncharacterized protein	-5.18494
Cc03_g13280	GSCOC_T00018943001	Probable LRR receptor-like serine threonine- kinase At3g47570	-5.17693
Cc06_g23610	GSCOC_T00040546001	Cellulose synthase A catalytic subunit	-5.17171
Cc05_g06150	GSCOC_T00042094001	Uncharacterized protein	-5.15857
Cc11_g09230	GSCOC_T00032765001	DETOXIFICATION 6	-5.15857
Cc08_g01770	GSCOC_T00038337001	Purine permease 21	-5.15199
Cc08_g08690	GSCOC_T00009072001	Probable LRR receptor-like serine threonine- kinase At3g47570	-5.15199
Cc11_g04830	GSCOC_T00042919001	Phosphoserine chloroplastic	-5.14286
Cc01_g14830	GSCOC_T00028499001	Cation H(+) antiporter 24	-5.14132
Cc00_g29360	GSCOC_T00010479001	Reticuline oxidase	-5.14132
Cc00_g15240	GSCOC_T00001826001	UDP-glycosyltransferase 74E2	-5.13873
Cc00_g28490	GSCOC_T00010458001	SRG1	-5.13202
Cc04_g16350	GSCOC_T00035725001	Valencene synthase	-5.12383
Cc02_g02970	GSCOC_T00020167001	Heavy metal-associated isoprenylated plant 26	-5.11834
Cc04_g16460	GSCOC_T00035747001	Cytosolic sulfotransferase 5	-5.11831
Cc03_g05310	GSCOC_T00026280001	Deacetoxyvindoline 4-hydroxylase	-5.11264
Cc00_g22730	GSCOC_T00008889001	Reticuline oxidase	-5.10284
Cc11_g03840	GSCOC_T00033992001	late blight resistance homolog R1B-14	-5.09619
Cc11_g10770	GSCOC_T00032534001	Piriformospora indica-insensitive 2	-5.09325
Cc07_g03410	GSCOC_T00039570001	8-amino-7-oxononanoate synthase	-5.09242
Cc01_g13560	GSCOC_T00028326001	Copper transporter 6	-5.09035
Cc00_g17710	GSCOC_T00007787001	Alcohol dehydrogenase-like 7	-5.08952
Cc03_g05020	GSCOC_T00026239001	Cellulose synthase G2	-5.08853
Cc00_g19270	GSCOC_T00011842001	Beta-amylase	-5.08262
Cc00_g34850	GSCOC_T00004662001	Cysteine chloroplastic chromoplastic	-5.07884
Cc07_g13050	GSCOC_T00036799001	Cysteine-rich receptor kinase 2	-5.07451
Cc04_g06890	GSCOC_T00022490001	Probable non-specific lipid-transfer AKCS9	-5.06342
Cc02_g20110	GSCOC_T00014614001	Amino acid permease 6	-5.06148
Cc11_g01470	GSCOC_T00019562001	Pleiotropic drug resistance 1	-5.0585
Cc02_g25910	GSCOC_T00028682001	Uncharacterized protein	-5.05776
Cc00_g24410	GSCOC_T00009805001	Probable LRR receptor-like serine threonine- kinase At3g47570	-5.05134
Cc10_g14520	GSCOC_T00033588001	Uncharacterized protein	-5.04008
Cc02_g26650	GSCOC_T00024965001	26S proteasome non-ATPase regulatory subunit 1	-5.03937
Cc10_g00850	GSCOC_T00024545001	Lysine histidine transporter-like 7	-5.03856
Cc11_g06470	GSCOC_T00020663001	Receptor 12	-5.03856
Cc08_g14550	GSCOC_T00030208001	Glutathione S-transferase T2	-5.03237
Cc11_g12960	GSCOC_T00032246001	Extracellular ribonuclease LE	-5.02422
Cc04_g16380	GSCOC_T00035729001	(-)-germacrene D synthase	-5.02096
Cc00_g03120	GSCOC_T00003068001	Annexin RJ4	-5.0193
Cc00_g07080	GSCOC_T00008957001	Probable LRR receptor-like serine threonine- kinase At3g47570	-5.01602
Cc00_g30130	GSCOC_T00007280001	Signal recognition particle subunit SRP68	-5.00836
Cc10_g09100	GSCOC_T00034296001	LRR receptor-like serine threonine- kinase GSO1	-5.00264
Cc00_g21490	GSCOC_T00004209001	Cysteine-rich receptor kinase 10	-4.99683
Cc07_g17240	GSCOC_T00037458001	Uncharacterized protein	-4.99473
Cc04_g02930	GSCOC_T00021977001	NRT1 PTR FAMILY	-4.99399
Cc00_g12960	GSCOC_T00000115001	Probable LRR receptor-like serine threonine- kinase At3g47570	-4.99327
Cc03_g11790	GSCOC_T00043204001	Uncharacterized protein	-4.99327
Cc00_g26520	GSCOC_T00008501001	Uncharacterized protein	-4.98579
Cc01_g02590	GSCOC_T00009677001	Uncharacterized protein	-4.98579
Cc06_g17770	GSCOC_T00040366001	Zeatin O-glucosyltransferase	-4.98579
Cc11_g09140	GSCOC_T00032777001	Probable S-adenosylmethionine-dependent methyltransferase At5g37990	-4.98556
Cc00_g34740	GSCOC_T00011432001	Uncharacterized protein	-4.97833
Cc06_g21910	GSCOC_T00015604001	NLP6	-4.97833
Cc06_g15470	GSCOC_T00030819001	Chitinase-3 1	-4.9781
Cc02_g16500	GSCOC_T00014143001	Uncharacterized protein	-4.97806
Cc06_g14150	GSCOC_T00041294001	Uncharacterized protein	-4.97086
Cc10_g05300	GSCOC_T00034827001	Stem-specific TSJT1	-4.97006
Cc08_g12460	GSCOC_T00030479001	Chaperone dnaJ 13	-4.96336
Cc09_g09290	GSCOC_T00023068001	Disease resistance RPP8	-4.96336
Cc10_g11830	GSCOC_T00031860001	Uncharacterized protein	-4.96336
Cc05_g13060	GSCOC_T00021109001	(-)-germacrene D synthase	-4.95856
Cc06_g12640	GSCOC_T00041512001	Auxin-induced 15A	-4.95582
Cc00_g16130	GSCOC_T00000994001	Thylakoidal processing peptidase chloroplastic	-4.94821
Cc05_g06210	GSCOC_T00042103001	Dynamin-related 1E	-4.9459
Cc10_g00800	GSCOC_T00024539001	Uncharacterized protein	-4.92502
Cc00_g03160	GSCOC_T00002125001	Probable pectinesterase pectinesterase inhibitor 47	-4.92331
Cc07_g06610	GSCOC_T00039978001	Probable indole-3-acetic acid-amido synthetase	-4.92331
Cc00_g06710	GSCOC_T00007498001	Uncharacterized protein	-4.91548
Cc01_g03260	GSCOC_T00033141001	Elongation factor P	-4.91295
Cc08_g11210	GSCOC_T00027117001	Uncharacterized protein	-4.89195
Cc00_g35560	GSCOC_T00003643001	Uncharacterized protein	-4.88471
Cc00_g30390	GSCOC_T00004757001	Actin-related 4	-4.884
Cc00_g14670	GSCOC_T00013421001	Flavonoid 3 -monooxygenase	-4.88117
Cc08_g07150	GSCOC_T00025318001	Early nodulin 3	-4.87961
Cc06_g16760	GSCOC_T00004127001	Thiol protease SEN102	-4.87597
Cc07_g20390	GSCOC_T00015690001	Uncharacterized protein	-4.87597
Cc00_g35590	GSCOC_T00013712001	Gibberellin 3-beta-dioxygenase 3	-4.86417
Cc11_g03930	GSCOC_T00034002001	ABHD4	-4.86173
Cc03_g15120	GSCOC_T00026769001	UDP-glycosyltransferase 74E2	-4.85801
Cc10_g10030	GSCOC_T00031465001	Anthocyanidin	-4.85457
Cc10_g15770	GSCOC_T00033771001	Aspartic ase nepenthesin-1	-4.85191
Cc02_g28210	GSCOC_T00025191001	Transcription factor bHLH126	-4.84978
Cc02_g32880	GSCOC_T00016713001	DNA repair recA homolog mitochondrial	-4.84978
Cc11_g10880	GSCOC_T00032517001	Uncharacterized protein	-4.84978
Cc07_g14900	GSCOC_T00036556001	UDP-glycosyltransferase 85A3	-4.83878
Cc06_g04750	GSCOC_T00042997001	Probable allantoin permease	-4.83539
Cc02_g06680	GSCOC_T00039211001	Probable LRR receptor-like serine threonine- kinase At3g47570	-4.83336
Cc02_g17470	GSCOC_T00014264001	Epoxide hydrolase 3	-4.83336
Cc07_g14420	GSCOC_T00036617001	DETOXIFICATION 41	-4.82511
Cc05_g04660	GSCOC_T00007006001	Uncharacterized protein	-4.82452
Cc06_g10080	GSCOC_T00041832001	Probable xyloglucan endotransglucosylase hydrolase 26	-4.8168
Cc10_g10810	GSCOC_T00019415001	Transcription factor BTF3	-4.8168
Cc02_g03550	GSCOC_T00020242001	Peroxidase 66	-4.81561
Cc03_g05860	GSCOC_T00026358001	Uncharacterized protein	-4.8084
Cc07_g19740	GSCOC_T00033857001	Uncharacterized protein	-4.8084
Cc06_g22070	GSCOC_T00017141001	Cytochrome P450 83B1	-4.80778
Cc02_g21090	GSCOC_T00014745001	Purine permease 1	-4.80668
Cc11_g02930	GSCOC_T00025505001	Probable disease resistance RPP8 2	-4.78097
Cc07_g08110	GSCOC_T00040174001	Transcription factor bHLH83	-4.7744
Cc07_g17530	GSCOC_T00008836001	Probable cinnamyl alcohol dehydrogenase 9	-4.77315
Cc06_g19560	GSCOC_T00029023001	UDP-glucose flavonoid 3-O-glucosyltransferase 3	-4.77233
Cc00_g24130	GSCOC_T00008927001	Uncharacterized protein	-4.76368
Cc00_g35710	GSCOC_T00010453001	Acidic endochitinase	-4.76368
Cc00_g33790	GSCOC_T00013321001	Cysteine synthase	-4.76353
Cc07_g11010	GSCOC_T00037048001	Uncharacterized protein	-4.7612
Cc09_g07830	GSCOC_T00003767001	3-ketoacyl- synthase 19	-4.7612
Cc08_g07930	GSCOC_T00011897001	Probable receptor kinase At5g18500	-4.75581
Cc01_g06390	GSCOC_T00030017001	MADS-box SOC1	-4.75502
Cc05_g02250	GSCOC_T00018428001	Zinc finger CCCH domain-containing 44	-4.75502
Cc04_g13420	GSCOC_T00018291001	UDP-glycosyltransferase 74B1	-4.75084
Cc00_g12980	GSCOC_T00005422001	8-hydroxyquercetin 8-O-methyltransferase	-4.749
Cc02_g10670	GSCOC_T00029504001	Monocopper oxidase SKS2	-4.74631
Cc11_g07440	GSCOC_T00018053001	Acetyl-coenzyme A chloroplastic glyoxysomal	-4.74631
Cc08_g12750	GSCOC_T00030436001	Cation H(+) antiporter 15	-4.74422
Cc10_g09130	GSCOC_T00034292001	Hydroxysteroid 11-beta-dehydrogenase 1	-4.73244
Cc11_g09480	GSCOC_T00032718001	Uncharacterized protein	-4.72754
Cc01_g19550	GSCOC_T00016044001	Uncharacterized protein	-4.72567
Cc11_g05320	GSCOC_T00020478001	G-type lectin S-receptor-like serine threonine- kinase SD2-5	-4.72405
Cc01_g18420	GSCOC_T00016207001	Hyoscyamine 6-dioxygenase	-4.72399
Cc03_g07660	GSCOC_T00026625001	Chalcone--flavonone isomerase	-4.72399
Cc09_g04190	GSCOC_T00017457001	Beta-glucosidase 42	-4.71497
Cc02_g15050	GSCOC_T00013937001	Probable serine threonine- kinase drkA	-4.7118
Cc00_g30580	GSCOC_T00005597001	Disease resistance RGA2	-4.71045
Cc04_g02850	GSCOC_T00021967001	F-box WD repeat-containing sel-10	-4.71027
Cc05_g08940	GSCOC_T00016935001	G-type lectin S-receptor-like serine threonine- kinase SD2-5	-4.70875
Cc01_g16730	GSCOC_T00016406001	Uncharacterized protein	-4.70655
Cc10_g08330	GSCOC_T00034401001	Rhamnogalacturonate lyase	-4.69977
Cc02_g14360	GSCOC_T00013843001	Glutamate receptor	-4.69224
Cc00_g34580	GSCOC_T00011410001	Coiled-coil domain-containing 25	-4.69049
Cc02_g13950	GSCOC_T00029076001	F-box At4g18380	-4.69049
Cc09_g10020	GSCOC_T00041100001	Quinone oxidoreductase PIG3	-4.6858
Cc01_g03710	GSCOC_T00033057001	Omega-6 fatty acid endoplasmic reticulum isozyme 2	-4.68579
Cc00_g33540	GSCOC_T00008896001	Beta-glucosidase 24	-4.68466
Cc07_g20220	GSCOC_T00016982001	Uncharacterized protein	-4.68136
Cc07_g13710	GSCOC_T00036704001	Geraniol dehydrogenase 1	-4.67652
Cc11_g10350	GSCOC_T00032589001	Uncharacterized protein	-4.67503
Cc00_g01330	GSCOC_T00010932001	Uncharacterized protein	-4.67218
Cc08_g05460	GSCOC_T00024314001	Organic cation carnitine transporter 2	-4.66877
Cc01_g06710	GSCOC_T00030069001	Double-stranded RNA-binding 3	-4.66294
Cc05_g00480	GSCOC_T00017085001	Nuclear transcription factor Y subunit B-6	-4.66294
Cc11_g02540	GSCOC_T00018514001	Cytosolic sulfotransferase 15	-4.65541
Cc02_g04900	GSCOC_T00020421001	Ras-related Rab-1D	-4.65357
Cc04_g07460	GSCOC_T00022565001	Uncharacterized protein	-4.65248
Cc06_g04280	GSCOC_T00023742001	4-coumarate-- ligase-like 7	-4.64782
Cc06_g00660	GSCOC_T00023253001	Wound-induced 1	-4.64255
Cc00_g33470	GSCOC_T00006799001	Uncharacterized protein	-4.64242
Cc11_g02920	GSCOC_T00025506001	Disease resistance RPP13	-4.63276
Cc07_g17710	GSCOC_T00018861001	G-type lectin S-receptor-like serine threonine- kinase RLK1	-4.63138
Cc00_g12640	GSCOC_T00005842001	B3 domain-containing Os04g0386900	-4.62745
Cc00_g08800	GSCOC_T00011512001		-4.62305
Cc07_g16860	GSCOC_T00037508001	Nodulation-signaling pathway 2	-4.61339
Cc11_g10140	GSCOC_T00032617001	LOB domain-containing 41	-4.61117
Cc02_g19990	GSCOC_T00014579001	Uncharacterized protein	-4.60869
Cc02_g03700	GSCOC_T00020263001	Subtilisin-like protease	-4.60833
Cc05_g01140	GSCOC_T00000918001	Uncharacterized protein	-4.60776
Cc02_g20810	GSCOC_T00014700001	Dehydrodolichyl diphosphate synthase complex subunit NUS1	-4.60769
Cc02_g39060	GSCOC_T00027770001	Serine threonine- kinase 38	-4.60373
Cc06_g13000	GSCOC_T00041461001	Uncharacterized protein	-4.60373
Cc06_g21690	GSCOC_T00015561001	Transcription factor bHLH18	-4.60373
Cc07_g18760	GSCOC_T00018700001	Tyrosine-sulfated glycopeptide receptor 1	-4.60222
Cc02_g04520	GSCOC_T00020369001	leucine-rich repeat receptor kinase At2g19210	-4.59769
Cc01_g17390	GSCOC_T00016329001	Uncharacterized protein	-4.59765
Cc03_g01690	GSCOC_T00025790001	Phylloplanin	-4.5964
Cc00_g02920	GSCOC_T00004313001	Uncharacterized protein	-4.59405
Cc00_g15610	GSCOC_T00013445001	NADPH-dependent aldehyde reductase chloroplastic	-4.59405
Cc02_g29260	GSCOC_T00004509001	Uncharacterized protein	-4.59405
Cc00_g15740	GSCOC_T00010314001	Disease resistance RPM1	-4.59336
Cc02_g14270	GSCOC_T00013834001	GDSL esterase lipase At5g45960	-4.59264
Cc09_g04420	GSCOC_T00017428001	Uncharacterized protein	-4.59263
Cc03_g08860	GSCOC_T00033327001	Uncharacterized protein	-4.58429
Cc04_g16370	GSCOC_T00035727001	Valencene synthase	-4.58429
Cc03_g00840	GSCOC_T00025681001	Receptor kinase ANXUR2	-4.58211
Cc10_g08470	GSCOC_T00034385001	UDP-glycosyltransferase 91C1	-4.57187
Cc08_g04480	GSCOC_T00015634001	Anthocyanin regulatory C1	-4.57009
Cc10_g14660	GSCOC_T00033611001	Uncharacterized protein	-4.5526
Cc10_g10160	GSCOC_T00031448001	Dammarenediol II synthase	-4.55067
Cc11_g07320	GSCOC_T00018067001	Pentatricopeptide repeat-containing At2g01740	-4.54955
Cc06_g06040	GSCOC_T00043175001	1-aminocyclopropane-1-carboxylate oxidase homolog 1	-4.54949
Cc00_g19690	GSCOC_T00011330001	Probable histone	-4.54549
Cc09_g08100	GSCOC_T00020742001	disulfide isomerase-like 2-1	-4.54375
Cc00_g22300	GSCOC_T00004905001	Dammarenediol II synthase	-4.54225
Cc01_g21220	GSCOC_T00005006001	Histone H1	-4.53939
Cc04_g15210	GSCOC_T00006569001	GIGANTEA	-4.53196
Cc01_g13870	GSCOC_T00028369001	Laccase-4	-4.52912
Cc02_g12250	GSCOC_T00029308001	Equilibrative nucleoside transporter 4	-4.52714
Cc03_g04680	GSCOC_T00026195001	Probable disease resistance At1g58390	-4.5234
Cc00_g17770	GSCOC_T00012391001	Disease resistance RPM1	-4.5217
Cc00_g18880	GSCOC_T00002537001	Uncharacterized protein	-4.5217
Cc07_g14320	GSCOC_T00036628001	Mechanosensitive ion channel chloroplastic	-4.5217
Cc07_g18600	GSCOC_T00018729001	Auxin-induced 5NG4	-4.5217
Cc08_g03920	GSCOC_T00034191001	Cytochrome P450 76C4	-4.5207
Cc00_g30300	GSCOC_T00000842001	Uncharacterized protein	-4.51243
Cc10_g11230	GSCOC_T00018469001	late blight resistance homolog R1A-6	-4.51209
Cc08_g08770	GSCOC_T00003998001	Probable LRR receptor-like serine threonine- kinase At3g47570	-4.51143
Cc02_g24860	GSCOC_T00028832001	Homocysteine S-methyltransferase 3	-4.50739
Cc02_g15290	GSCOC_T00013972001	Probable LRR receptor-like serine threonine- kinase At3g47570	-4.5066
Cc00_g14870	GSCOC_T00001457001	Uncharacterized protein	-4.50111
Cc06_g20620	GSCOC_T00023010001	Homeobox-leucine zipper HAT9	-4.50111
Cc00_g28770	GSCOC_T00004513001	Homocysteine S-methyltransferase 2	-4.49394
Cc02_g31160	GSCOC_T00027611001	Acyltransferase chloroplastic	-4.49366
Cc02_g01230	GSCOC_T00019937001	Histone-lysine N-methyltransferase ATXR6	-4.49068
Cc05_g10270	GSCOC_T00021474001	LRR receptor-like serine threonine- kinase GHR1	-4.49068
Cc06_g18730	GSCOC_T00028895001	Uncharacterized protein	-4.49068
Cc09_g08960	GSCOC_T00023131001	Probable carboxylesterase 5	-4.49063
Cc08_g07410	GSCOC_T00025369001	Premnaspirodiene oxygenase	-4.48553
Cc08_g02840	GSCOC_T00037776001	2 -deoxymugineic-acid 2 -dioxygenase	-4.48342
Cc00_g10320	GSCOC_T00008233001	ASPARTIC PROTEASE IN GUARD CELL 1	-4.48296
Cc00_g10210	GSCOC_T00003161001	DNA repair recA homolog mitochondrial	-4.47031
Cc04_g13370	GSCOC_T00018298001	Uncharacterized protein	-4.46
Cc01_g02850	GSCOC_T00013223001	Probable acyl-activating enzyme peroxisomal	-4.45671
Cc04_g15720	GSCOC_T00042350001	NRT1 PTR FAMILY	-4.45671
Cc06_g21260	GSCOC_T00018122001	GMP synthas	-4.45671
Cc10_g09910	GSCOC_T00031484001	Stromal cell-derived factor 2	-4.45671
Cc03_g14880	GSCOC_T00026734001	UDP-glycosyltransferase 71C2	-4.45377
Cc09_g06240	GSCOC_T00033339001	Furcatin hydrolase	-4.43773
Cc00_g35050	GSCOC_T00005379001	Mediator of RNA polymerase II transcription subunit 21	-4.43475
Cc02_g29980	GSCOC_T00038932001	60S ribosomal L7-4	-4.42
Cc11_g03830	GSCOC_T00033989001	Acetylornithine deacetylase	-4.41972
Cc00_g15940	GSCOC_T00007990001	Disease resistance RPM1	-4.41591
Cc06_g21870	GSCOC_T00015596001	NLP7	-4.41283
Cc02_g11470	GSCOC_T00029408001	Serine carboxypeptidase-like 27	-4.40724
Cc00_g18080	GSCOC_T00007955001	Germin subfamily T member 2	-4.40467
Cc00_g13560	GSCOC_T00002622001	Uncharacterized protein	-4.40175
Cc04_g11260	GSCOC_T00037295001	Psoralen synthase	-4.40175
Cc05_g13610	GSCOC_T00021039001	Cytochrome P450 716B1	-4.40175
Cc06_g02140	GSCOC_T00023458001	Methyltransferase N6AMT1	-4.39569
Cc00_g18660	GSCOC_T00013355001	Uncharacterized protein	-4.39054
Cc07_g17520	GSCOC_T00008834001	Receptor 12	-4.39054
Cc08_g11550	GSCOC_T00027159001	Hyoscyamine 6-dioxygenase	-4.39054
Cc01_g07070	GSCOC_T00030127001	Uncharacterized protein	-4.38829
Cc09_g07960	GSCOC_T00003784001	Chaperone	-4.3821
Cc04_g12850	GSCOC_T00003259001	Ubiquitin-40S ribosomal S27a-1	-4.37912
Cc07_g20920	GSCOC_T00027256001	nuclease HARBI1	-4.37912
Cc00_g13570	GSCOC_T00012636001	Uncharacterized protein	-4.36744
Cc03_g07840	GSCOC_T00033158001	Uncharacterized protein	-4.36744
Cc04_g03290	GSCOC_T00022022001	Acid phosphatase 1	-4.35567
Cc05_g03880	GSCOC_T00017318001	Cysteine-rich receptor kinase 10	-4.35111
Cc11_g14370	GSCOC_T00032066001	MLP 423	-4.35065
Cc09_g10340	GSCOC_T00041057001	Serine threonine phosphatase 2A 59 kDa regulatory subunit B eta isoform	-4.34869
Cc05_g00090	GSCOC_T00017027001	Uncharacterized protein	-4.33918
Cc02_g16440	GSCOC_T00014134001	amidase	-4.33724
Cc06_g07530	GSCOC_T00031250001	Probable flavin-containing monooxygenase 1	-4.32908
Cc00_g16280	GSCOC_T00011498001	Probable LRR receptor-like serine threonine- kinase At1g53420	-4.32542
Cc00_g09470	GSCOC_T00008035001	Dolichyl-diphosphooligosaccharide-- glycosyltransferase subunit STT3A	-4.32313
Cc04_g07170	GSCOC_T00022523001	domain-containing GPI-anchored 1	-4.31339
Cc07_g03350	GSCOC_T00039562001	Myb-related 306	-4.31091
Cc08_g12120	GSCOC_T00030523001	DNA repair RAD5B	-4.30143
Cc04_g04080	GSCOC_T00022126001	Disease resistance RPH8A	-4.29864
Cc00_g21530	GSCOC_T00007649001	G-type lectin S-receptor-like serine threonine- kinase RLK1	-4.29354
Cc05_g13070	GSCOC_T00021108001	(-)-germacrene D synthase	-4.28958
Cc05_g13110	GSCOC_T00021104001	Dihydroflavonol 4-reductase	-4.26953
Cc00_g12290	GSCOC_T00009516001	S-norcoclaurine synthase	-4.26293
Cc02_g35680	GSCOC_T00042809001	Pleiotropic drug resistance 3	-4.26069
Cc02_g28740	GSCOC_T00018161001	disease resistance At3g14460	-4.24997
Cc00_g20660	GSCOC_T00008222001	MDIS1-interacting receptor like kinase 2	-4.2375
Cc11_g06830	GSCOC_T00020711001	Receptor 12	-4.22834
Cc01_g04940	GSCOC_T00028571001	ABC transporter G family member 15	-4.22676
Cc10_g01490	GSCOC_T00024620001	Kinesin 6	-4.21732
Cc02_g27550	GSCOC_T00025086001	DNA damage-repair toleration DRT100	-4.2134
Cc01_g04570	GSCOC_T00041187001	Uncharacterized protein	-4.20446
Cc06_g13430	GSCOC_T00041399001	Probable xyloglucan endotransglucosylase hydrolase 23	-4.19996
Cc11_g07950	GSCOC_T00032942001	Probable LRR receptor-like serine threonine- kinase At3g47570	-4.19802
Cc00_g24750	GSCOC_T00010167001	Glycosyltransferase family 92 Os08g0121900	-4.19662
Cc11_g08080	GSCOC_T00032923001	Myb family transcription factor APL	-4.19331
Cc00_g30540	GSCOC_T00011249001	Late blight resistance R1-A	-4.18877
Cc00_g20840	GSCOC_T00003232001	Probable LRR receptor-like serine threonine- kinase At3g47570	-4.18367
Cc07_g06330	GSCOC_T00039934001	Uncharacterized protein	-4.17037
Cc00_g06670	GSCOC_T00007492001	Bifunctional dihydroflavonol 4-reductase flavanone 4-reductase	-4.17029
Cc00_g07490	GSCOC_T00008327001	Ubiquitin carboxyl-terminal hydrolase 13	-4.16389
Cc02_g31930	GSCOC_T00027470001	UDP-glycosyltransferase 83A1	-4.16177
Cc02_g14460	GSCOC_T00013857001	GDSL esterase lipase At5g45920	-4.16127
Cc05_g08910	GSCOC_T00016930001	late blight resistance homolog R1B-14	-4.15376
Cc00_g07320	GSCOC_T00000206001	Somatic embryogenesis receptor kinase 1	-4.1474
Cc03_g12730	GSCOC_T00015164001	Auxin response factor 18	-4.14528
Cc03_g13800	GSCOC_T00031735001	Disease resistance At4g27190	-4.14335
Cc07_g18110	GSCOC_T00018797001	Uncharacterized protein	-4.14122
Cc03_g04730	GSCOC_T00026201001	Probable disease resistance At1g58390	-4.12252
Cc02_g24360	GSCOC_T00002335001	Uncharacterized protein	-4.10725
Cc00_g09620	GSCOC_T00007388001	late blight resistance homolog R1B-17	-4.09134
Cc02_g33840	GSCOC_T00008628001	Dolichol-phosphate mannosyltransferase subunit 1	-4.08556
Cc01_g17760	GSCOC_T00016284001	Subtilisin-like protease	-4.08359
Cc07_g18170	GSCOC_T00018787001	Uncharacterized protein	-4.07967
Cc02_g12010	GSCOC_T00029343001	G-type lectin S-receptor-like serine threonine- kinase SD1-1	-4.06623
Cc01_g17460	GSCOC_T00016322001	GDSL esterase lipase At4g28780	-4.06402
Cc11_g07870	GSCOC_T00032954001	Probable LRR receptor-like serine threonine- kinase At3g47570	-4.06253
Cc04_g07330	GSCOC_T00022544001	ASPARTIC PROTEASE IN GUARD CELL 1	-4.05564
Cc00_g29410	GSCOC_T00005692001	BURP domain RD22	-4.053
Cc11_g01090	GSCOC_T00019641001	ASPARTIC PROTEASE IN GUARD CELL 2	-4.05251
Cc03_g03700	GSCOC_T00026068001	Phosphatidylinositol transfer 3	-4.04188
Cc06_g11460	GSCOC_T00041657001	Uncharacterized protein	-4.03097
Cc01_g03080	GSCOC_T00019039001	Auxin-induced 5NG4	-4.02991
Cc02_g34740	GSCOC_T00011780001	Uncharacterized protein	-4.02788
Cc05_g12870	GSCOC_T00021132001	G-type lectin S-receptor-like serine threonine- kinase At4g27290	-4.02549
Cc11_g04180	GSCOC_T00034056001	Cytosolic sulfotransferase 17	-4.01802
Cc00_g07940	GSCOC_T00006637001	Uncharacterized protein	-4.01626
Cc08_g14790	GSCOC_T00035388001	Transcription factor GLABRA 3	-4.0149
Cc06_g04660	GSCOC_T00042982001	Uncharacterized protein	-4.01054
Cc11_g07600	GSCOC_T00018028001	Uncharacterized protein	-4.00882
Cc02_g27940	GSCOC_T00025151001	Uncharacterized protein	-3.99961
Cc05_g13710	GSCOC_T00021027001	Uncharacterized protein	-3.99423
Cc01_g00940	GSCOC_T00038008001	Uncharacterized protein	-3.99276
Cc09_g10250	GSCOC_T00041068001	Uncharacterized protein	-3.99003
Cc03_g09720	GSCOC_T00030959001	Probable aldo-keto reductase 2	-3.9869
Cc07_g05630	GSCOC_T00039841001	7-ethoxycoumarin O-deethylase	-3.9869
Cc01_g03950	GSCOC_T00040882001	G-type lectin S-receptor-like serine threonine- kinase RLK1	-3.98664
Cc10_g05260	GSCOC_T00034833001	Cytochrome P450 81F1	-3.9861
Cc02_g16450	GSCOC_T00014135001	Uncharacterized protein	-3.97449
Cc05_g02700	GSCOC_T00020898001	Vacuolar sorting-associated 8 homolog	-3.95727
Cc07_g10930	GSCOC_T00037057001	MLO 4	-3.95344
Cc11_g02900	GSCOC_T00025510001	Disease resistance RPP8 3	-3.9453
Cc00_g20820	GSCOC_T00008930001	Uncharacterized protein	-3.94501
Cc02_g16390	GSCOC_T00014124001	Auxin transporter 5	-3.938
Cc11_g06250	GSCOC_T00020631001	Blue copper	-3.922
Cc05_g10640	GSCOC_T00021414001	Uncharacterized protein	-3.92059
Cc00_g33620	GSCOC_T00005757001	LRR receptor-like serine threonine- kinase EFR	-3.90676
Cc11_g06320	GSCOC_T00020642001	late blight resistance homolog R1B-14	-3.89274
Cc02_g18010	GSCOC_T00014334001	Uncharacterized protein	-3.88819
Cc08_g08620	GSCOC_T00009064001	Sacsin	-3.88753
Cc00_g28740	GSCOC_T00006626001	disease resistance RGA3	-3.88002
Cc04_g17040	GSCOC_T00035826001	Pectinesterase 1	-3.87556
Cc02_g35230	GSCOC_T00042879001	Probable glycerol-3-phosphate acyltransferase 2	-3.87168
Cc06_g02310	GSCOC_T00023485001	Uncharacterized protein	-3.86669
Cc02_g32040	GSCOC_T00018912001	Serine threonine- kinase BRI1-like 1	-3.85154
Cc00_g15570	GSCOC_T00011342001	Probable 2-oxoglutarate Fe(II)-dependent dioxygenase	-3.84702
Cc03_g04180	GSCOC_T00026127001	Sulfate transporter	-3.83569
Cc06_g18070	GSCOC_T00040407001	MDIS1-interacting receptor like kinase 2	-3.83312
Cc05_g09460	GSCOC_T00021583001	Leucine-rich repeat soc-2 homolog	-3.82887
Cc10_g06850	GSCOC_T00034604001	Uncharacterized protein	-3.82495
Cc06_g00670	GSCOC_T00023255001	Sex determination tasselseed-2	-3.82446
Cc00_g29830	GSCOC_T00007719001	disease resistance At3g14460	-3.82149
Cc10_g03570	GSCOC_T00024886001	Allene oxide chloroplastic	-3.82002
Cc08_g13060	GSCOC_T00030388001	21 kDa	-3.81856
Cc04_g14870	GSCOC_T00040771001	Uncharacterized protein	-3.81005
Cc01_g04010	GSCOC_T00040856001	Isoflavone reductase homolog P3	-3.80167
Cc10_g02760	GSCOC_T00024784001	4-hydroxyphenylalkanoate adenylyltransferase	-3.80167
Cc02_g00720	GSCOC_T00019862001	Heavy metal-associated isoprenylated plant 26	-3.80032
Cc07_g21200	GSCOC_T00027204001	Uncharacterized protein	-3.7932
Cc05_g11480	GSCOC_T00021310001	Glutamate receptor	-3.78912
Cc08_g08240	GSCOC_T00007244001	Uncharacterized protein	-3.78885
Cc00_g13620	GSCOC_T00011115001	Uncharacterized protein	-3.78411
Cc08_g15020	GSCOC_T00035424001	Zinc finger CONSTANS-LIKE 5	-3.78156
Cc05_g03610	GSCOC_T00017366001	cellulose synthase H3	-3.77294
Cc03_g07650	GSCOC_T00026622001	Uncharacterized protein	-3.76705
Cc09_g04820	GSCOC_T00017376001	Apyrase	-3.76195
Cc00_g31630	GSCOC_T00005665001	Uncharacterized protein	-3.74945
Cc06_g13440	GSCOC_T00041397001	Xyloglucan endotransglucosylase hydrolase 22	-3.74902
Cc08_g12760	GSCOC_T00030435001	14 kDa proline-rich	-3.74722
Cc02_g14590	GSCOC_T00013872001	GDSL esterase lipase At5g45910	-3.74711
Cc11_g05570	GSCOC_T00020515001	UDP-glycosyltransferase 83A1	-3.7384
Cc11_g15290	GSCOC_T00038039001	Polygalacturonase At1g48100	-3.73432
Cc07_g13940	GSCOC_T00036675001	UDP-rhamnose:rhamnosyltransferase 1	-3.72834
Cc01_g13550	GSCOC_T00028324001	Copper transporter 1	-3.72487
Cc06_g05070	GSCOC_T00043039001	Cytochrome P450 76A2	-3.71605
Cc03_g13780	GSCOC_T00031733001	Uncharacterized protein	-3.71048
Cc02_g15160	GSCOC_T00013953001	CBL-interacting kinase 5	-3.71034
Cc05_g09310	GSCOC_T00002647001	Uncharacterized protein	-3.7094
Cc02_g09240	GSCOC_T00029683001	Uncharacterized protein	-3.70374
Cc00_g21390	GSCOC_T00000218001	Probably inactive leucine-rich repeat receptor kinase At5g48380	-3.70146
Cc03_g14830	GSCOC_T00026726001	UDP-glycosyltransferase 71C2	-3.68777
Cc05_g00210	GSCOC_T00017046001	Glutamate receptor	-3.6829
Cc02_g29590	GSCOC_T00018398001	Vetispiradiene synthase 1	-3.67966
Cc07_g03490	GSCOC_T00039583001	Expansin-A15	-3.67815
Cc01_g08090	GSCOC_T00015498001	Uncharacterized protein	-3.67757
Cc01_g05440	GSCOC_T00027334001	Esterase PIR7B	-3.67613
Cc03_g08950	GSCOC_T00042741001	Uncharacterized protein	-3.67285
Cc02_g36340	GSCOC_T00003937001	Probable carboxylesterase 8	-3.67267
Cc06_g17260	GSCOC_T00036361001	Cell division cycle 48 homolog	-3.67187
Cc00_g23360	GSCOC_T00005371001	Small nuclear ribonucleo Sm D3	-3.66385
Cc07_g09890	GSCOC_T00037186001	Uncharacterized protein	-3.66374
Cc03_g09230	GSCOC_T00042697001	UDP-glycosyltransferase 75D1	-3.66056
Cc00_g05440	GSCOC_T00000302001	Uncharacterized protein	-3.66042
Cc11_g02810	GSCOC_T00025526001	Flotillin 1	-3.66021
Cc10_g03270	GSCOC_T00024850001	Anthocyanidin 3-O-glucosyltransferase 5	-3.6595
Cc04_g05270	GSCOC_T00022275001	Uncharacterized protein	-3.65822
Cc07_g00150	GSCOC_T00019078001	Glycerol-3-phosphate dehydrogenas	-3.64826
Cc06_g18090	GSCOC_T00040413001	Glycerol-3-phosphate dehydrogenas	-3.64824
Cc00_g20040	GSCOC_T00008217001	Uncharacterized protein	-3.64166
Cc10_g06880	GSCOC_T00034601001	Uncharacterized protein	-3.64166
Cc10_g16070	GSCOC_T00033817001	Uncharacterized protein	-3.62367
Cc00_g30250	GSCOC_T00011526001	Uncharacterized protein	-3.62273
Cc10_g14650	GSCOC_T00033609001	Uncharacterized protein	-3.62273
Cc01_g09530	GSCOC_T00024013001	DNA polymerase epsilon catalytic subunit A	-3.62026
Cc07_g05000	GSCOC_T00039761001	GAMETE EXPRESSED 3	-3.61711
Cc00_g11820	GSCOC_T00007746001	Cyclin-D2-1	-3.61576
Cc02_g39370	GSCOC_T00027725001	O-acyltransferase WSD1	-3.61532
Cc02_g03230	GSCOC_T00020199001	Leucine-rich repeat receptor kinase EMS1	-3.61353
Cc00_g24670	GSCOC_T00005960001	Cytochrome P450 81D1	-3.61212
Cc10_g01310	GSCOC_T00024601001	Probable cinnamyl alcohol dehydrogenase 6	-3.60603
Cc10_g00910	GSCOC_T00024551001	L-ascorbate oxidase homolog	-3.59987
Cc04_g08050	GSCOC_T00022653001	Tropinone reductase homolog At1g07440	-3.59649
Cc07_g04130	GSCOC_T00039664001	UDP-glycosyltransferase 83A1	-3.59611
Cc05_g16220	GSCOC_T00038590001	Zinc finger CONSTANS-LIKE 3	-3.59342
Cc03_g04550	GSCOC_T00026178001	3-ketoacyl- synthase 2	-3.58905
Cc10_g03910	GSCOC_T00024934001	Uncharacterized protein	-3.58738
Cc06_g23530	GSCOC_T00040556001	Organic cation carnitine transporter 7	-3.58087
Cc01_g11280	GSCOC_T00024253001	Uncharacterized protein	-3.5695
Cc01_g17340	GSCOC_T00016336001	Alcohol dehydrogenase 1	-3.5672
Cc05_g10800	GSCOC_T00021396001	Uncharacterized protein	-3.56491
Cc08_g15930	GSCOC_T00035539001	Uncharacterized protein	-3.56103
Cc04_g16750	GSCOC_T00035785001	Uncharacterized protein	-3.5595
Cc10_g10320	GSCOC_T00031428001	Gibberellin 20 oxidase 3	-3.55456
Cc08_g13330	GSCOC_T00030356001	Probable LRR receptor-like serine threonine- kinase At3g47570	-3.54949
Cc00_g10900	GSCOC_T00001638001	Oligopeptide transporter 4	-3.54949
Cc08_g07450	GSCOC_T00025373001	Premnaspirodiene oxygenase	-3.54211
Cc00_g25350	GSCOC_T00007286001	60S ribosomal L4	-3.53945
Cc02_g31390	GSCOC_T00027575001	Cysteine synthase	-3.52897
Cc09_g10030	GSCOC_T00041099001	Quinone oxidoreductase PIG3	-3.52595
Cc07_g17690	GSCOC_T00018863001	G-type lectin S-receptor-like serine threonine- kinase RLK1	-3.52153
Cc11_g07660	GSCOC_T00018021001	late blight resistance homolog R1B-17	-3.52083
Cc07_g12890	GSCOC_T00036818001	B3 domain-containing REM17	-3.51996
Cc03_g03890	GSCOC_T00026090001	Uncharacterized protein	-3.51807
Cc00_g35020	GSCOC_T00002415001	Uncharacterized protein	-3.51727
Cc11_g16200	GSCOC_T00038155001	Probable pectate lyase 5	-3.5157
Cc11_g06760	GSCOC_T00020702001	Leucine-rich repeat receptor kinase PXL1	-3.50918
Cc11_g07190	GSCOC_T00018089001	Ankyrin repeat-containing ITN1	-3.50444
Cc02_g12120	GSCOC_T00029330001	Uncharacterized protein	-3.50293
Cc09_g07590	GSCOC_T00036235001	Cytochrome P450 734A1	-3.48693
Cc00_g23880	GSCOC_T00012444001	Serine carboxypeptidase-like 18	-3.48558
Cc00_g17630	GSCOC_T00002524001	Beta-galactosidase 8	-3.48078
Cc10_g06840	GSCOC_T00034605001	Uncharacterized protein	-3.47436
Cc01_g19070	GSCOC_T00016106001	Ankyrin repeat-containing ITN1	-3.47412
Cc00_g31860	GSCOC_T00006471001	Uncharacterized protein	-3.47026
Cc01_g19360	GSCOC_T00016067001	Uncharacterized protein	-3.46596
Cc02_g19970	GSCOC_T00014577001	Codeine O-demethylase	-3.46346
Cc09_g07270	GSCOC_T00036287001	Alpha-glucosidase	-3.45984
Cc06_g15650	GSCOC_T00030792001	Probable kinase At2g41970	-3.45628
Cc06_g18780	GSCOC_T00028906001	Mitochondrial fission 1	-3.45628
Cc10_g06870	GSCOC_T00034602001	Uncharacterized protein	-3.45431
Cc03_g04710	GSCOC_T00026199001	Probable disease resistance At1g58390	-3.44959
Cc04_g04750	GSCOC_T00022210001	Uncharacterized protein	-3.44829
Cc05_g01790	GSCOC_T00015759001	Viral IAP-associated factor homolog	-3.4447
Cc07_g16260	GSCOC_T00037585001	F-box kelch-repeat SKIP6	-3.431
Cc00_g35230	GSCOC_T00004678001	Gamma-tubulin complex component 5	-3.42205
Cc00_g34990	GSCOC_T00007870001	Cysteine synthase	-3.41539
Cc04_g11350	GSCOC_T00037306001	Manganese-dependent ADP-ribose CDP-alcohol diphosphatase	-3.41019
Cc05_g02500	GSCOC_T00020945001	GDSL esterase lipase At2g04570	-3.40868
Cc03_g10920	GSCOC_T00042034001	Cytochrome P450 71A2	-3.4066
Cc08_g08670	GSCOC_T00009069001	Uncharacterized protein	-3.40626
Cc07_g05330	GSCOC_T00039803001	Uncharacterized protein	-3.40295
Cc02_g18270	GSCOC_T00014366001	B3 domain-containing At5g18090	-3.40123
Cc02_g23840	GSCOC_T00015088001	Uncharacterized protein	-3.3981
Cc11_g12120	GSCOC_T00032358001	14-3-3 GF14 iota	-3.39478
Cc00_g31820	GSCOC_T00004172001	STRICTOSIDINE SYNTHASE-LIKE 12	-3.38514
Cc00_g18430	GSCOC_T00005203001	Alcohol dehydrogenase-like 3	-3.38372
Cc02_g22930	GSCOC_T00014971001	Uncharacterized protein	-3.38319
Cc06_g15460	GSCOC_T00030820001	Acidic mammalian chitinase	-3.38057
Cc08_g02380	GSCOC_T00037709001	Ent-kaurenoic acid oxidase 2	-3.37965
Cc03_g04520	GSCOC_T00026174001	Probable disease resistance At1g58390	-3.37491
Cc10_g09400	GSCOC_T00031549001	Immune-associated nucleotide-binding 10	-3.37173
Cc05_g06730	GSCOC_T00042182001	Uncharacterized protein	-3.36974
Cc02_g06730	GSCOC_T00039216001	Anthranilate synthase alpha subunit chloroplastic	-3.36921
Cc00_g12460	GSCOC_T00005353001	Deacetoxyvindoline 4-hydroxylase	-3.36905
Cc06_g12590	GSCOC_T00041519001	21 kDa	-3.36786
Cc06_g04800	GSCOC_T00043003001	Pistil-specific extensin	-3.36643
Cc07_g08060	GSCOC_T00040168001	Proteasome subunit beta type-5	-3.36405
Cc01_g04630	GSCOC_T00041203001	Dihydroflavonol 4-reductase	-3.35842
Cc07_g00070	GSCOC_T00019069001	Uridine kinase 5	-3.35509
Cc03_g05390	GSCOC_T00026289001	RING-H2 finger ATL16	-3.34695
Cc11_g04900	GSCOC_T00042936001	Probable pectinesterase pectinesterase inhibitor 40	-3.34618
Cc00_g05030	GSCOC_T00000057001	Probably inactive leucine-rich repeat receptor kinase At2g25790	-3.34229
Cc04_g09960	GSCOC_T00042530001	WD repeat-containing 18	-3.34195
Cc11_g02000	GSCOC_T00033041001	Probable disease resistance RPP8 2	-3.33977
Cc05_g08870	GSCOC_T00016926001	Secologanin synthase	-3.33889
Cc07_g20190	GSCOC_T00016978001	Uncharacterized protein	-3.32893
Cc08_g11890	GSCOC_T00030559001	Oleosin 16 kDa	-3.32713
Cc00_g04530	GSCOC_T00013593001	Indole-3-acetic acid-amido synthetase	-3.32264
Cc09_g07190	GSCOC_T00036302001	Reticuline oxidase	-3.32257
Cc00_g31070	GSCOC_T00006035001	Uncharacterized protein	-3.32159
Cc11_g05520	GSCOC_T00020510001	Receptor kinase 2	-3.31327
Cc08_g09410	GSCOC_T00017297001	UPF0481 At3g02645	-3.30808
Cc00_g10050	GSCOC_T00003814001	Trans-cinnamate 4-monooxygenase	-3.30723
Cc10_g09970	GSCOC_T00031477001	Glutathione transferase GST 23	-3.30532
Cc03_g01620	GSCOC_T00025779001	DETOXIFICATION 6	-3.29895
Cc00_g32840	GSCOC_T00000978001	Disease resistance At4g27190	-3.29473
Cc06_g15060	GSCOC_T00030885001	Probable LRR receptor-like serine threonine- kinase At2g24230	-3.2938
Cc04_g08640	GSCOC_T00022734001	Receptor-like serine threonine- kinase SD1-8	-3.29243
Cc02_g25740	GSCOC_T00028706001	Phosphoglycolate phosphatase	-3.29196
Cc00_g22750	GSCOC_T00008891001	Reticuline oxidase	-3.29009
Cc00_g04490	GSCOC_T00013587001	Indole-3-acetic acid-amido synthetase	-3.2835
Cc00_g34150	GSCOC_T00012633001	Uncharacterized protein	-3.27834
Cc01_g15110	GSCOC_T00016604001	Peroxidase 4	-3.27294
Cc09_g07970	GSCOC_T00003785001	Lysosomal alpha-mannosidase	-3.2722
Cc02_g18670	GSCOC_T00014418001	B3 domain-containing Os01g0234100	-3.27076
Cc04_g11390	GSCOC_T00037312001	Uncharacterized protein	-3.26945
Cc09_g06580	GSCOC_T00005111001	Uncharacterized protein	-3.26781
Cc02_g05500	GSCOC_T00039061001	Potassium transporter 2	-3.2622
Cc09_g02370	GSCOC_T00017686001	Cytochrome P450 86B1	-3.25804
Cc00_g29320	GSCOC_T00001281001	Probable membrane-associated kinase regulator 5	-3.25654
Cc05_g06010	GSCOC_T00035204001	Malonyl-coenzyme A:anthocyanin 3-O-glucoside-6 -O-malonyltransferase	-3.25651
Cc10_g02120	GSCOC_T00024709001	Uncharacterized protein	-3.25605
Cc03_g10910	GSCOC_T00042031001	Cytochrome P450 71A2	-3.25553
Cc02_g13480	GSCOC_T00029145001	Pistil-specific extensin	-3.25356
Cc07_g06070	GSCOC_T00039901001	Uncharacterized protein	-3.25269
Cc08_g08730	GSCOC_T00006910001	Probable LRR receptor-like serine threonine- kinase At3g47570	-3.24575
Cc06_g14840	GSCOC_T00030911001	Serine carboxypeptidase 24	-3.24179
Cc02_g13890	GSCOC_T00029082001	Receptor kinase 5	-3.24175
Cc02_g32480	GSCOC_T00001240001	Sugar transporter ERD6-like 8	-3.23881
Cc10_g08640	GSCOC_T00034363001	Uncharacterized protein	-3.23315
Cc05_g08900	GSCOC_T00016929001	Uncharacterized protein	-3.23309
Cc01_g16720	GSCOC_T00016407001	Uncharacterized protein	-3.22936
Cc07_g04220	GSCOC_T00039674001	Serine carboxypeptidase-like 25	-3.22834
Cc01_g13570	GSCOC_T00028327001	UDP-glycosyltransferase 76C4	-3.21998
Cc07_g16990	GSCOC_T00037488001	Flavonoid 3	-3.21649
Cc02_g24100	GSCOC_T00015123001	NRT1 PTR FAMILY	-3.21313
Cc00_g00500	GSCOC_T00036137001	Probable receptor kinase At5g39020	-3.21185
Cc09_g06600	GSCOC_T00005113001	Sister chromatid cohesion PDS5	-3.20724
Cc03_g10840	GSCOC_T00042015001	Leucine-rich repeat receptor kinase EMS1	-3.207
Cc00_g11280	GSCOC_T00009254001	Probable LRR receptor-like serine threonine- kinase At3g47570	-3.20621
Cc02_g38950	GSCOC_T00027787001	Ethylene-responsive transcription factor CRF4	-3.20463
Cc05_g02440	GSCOC_T00020969001	Disease resistance RFL1	-3.20336
Cc00_g17620	GSCOC_T00012044001	Nudix hydrolase 2	-3.20279
Cc10_g07650	GSCOC_T00034496001	Uncharacterized protein	-3.2015
Cc06_g13950	GSCOC_T00041325001	EG45-like domain containing 1	-3.19573
Cc11_g01400	GSCOC_T00019571001	Uncharacterized protein	-3.19437
Cc05_g02210	GSCOC_T00018421001	Disease resistance RPS2	-3.19415
Cc10_g14200	GSCOC_T00012009001	Dof zinc finger	-3.18877
Cc02_g20690	GSCOC_T00014687001	MADS-box transcription factor 27	-3.18433
Cc09_g08540	GSCOC_T00020824001	Uncharacterized protein	-3.17736
Cc06_g03690	GSCOC_T00023658001	Uncharacterized protein	-3.17582
Cc01_g10790	GSCOC_T00024186001	arsenical pump-driving ATPase	-3.17485
Cc00_g25640	GSCOC_T00006098001	Uncharacterized protein	-3.16387
Cc10_g11740	GSCOC_T00031845001	Uncharacterized protein	-3.15657
Cc05_g02480	GSCOC_T00020948001	GDSL esterase lipase At2g42990	-3.15515
Cc07_g02360	GSCOC_T00039423001	RING-H2 finger ATL47	-3.15378
Cc02_g31960	GSCOC_T00027465001	LRR receptor-like serine threonine- kinase FLS2	-3.15263
Cc02_g27030	GSCOC_T00025019001	Probable nucleoredoxin 1	-3.1516
Cc11_g15510	GSCOC_T00038065001	Uncharacterized protein	-3.1505
Cc03_g14560	GSCOC_T00026674001	disease resistance RGA4	-3.14981
Cc08_g07540	GSCOC_T00025386001	Santalene and bergamotene chloroplastic	-3.14299
Cc02_g33580	GSCOC_T00015395001	Probable nucleoredoxin 1-2	-3.14143
Cc11_g06680	GSCOC_T00020692001	Caffeoyl- O-methyltransferase	-3.13943
Cc10_g10570	GSCOC_T00036008001	Uncharacterized protein	-3.13934
Cc11_g17530	GSCOC_T00038328001	Uncharacterized protein	-3.13569
Cc04_g04880	GSCOC_T00022227001	Ethylene-responsive transcription factor ERF003	-3.13497
Cc02_g17440	GSCOC_T00014259001	Transcription factor bHLH63	-3.13375
Cc11_g08570	GSCOC_T00032854001	Uncharacterized protein	-3.13375
Cc00_g20600	GSCOC_T00013339001	Receptor 12	-3.13137
Cc09_g09740	GSCOC_T00004105001	Ankyrin-1	-3.12829
Cc04_g08080	GSCOC_T00022656001	Tropinone reductase homolog At1g07440	-3.12689
Cc11_g07230	GSCOC_T00018079001	Uncharacterized protein	-3.12407
Cc02_g37040	GSCOC_T00028044001	Subtilisin-like protease	-3.12165
Cc03_g09500	GSCOC_T00030930001	Uncharacterized protein	-3.12161
Cc02_g19820	GSCOC_T00014558001	Uncharacterized protein	-3.12127
Cc00_g04270	GSCOC_T00010977001	Uncharacterized protein	-3.10964
Cc00_g03770	GSCOC_T00002032001	Probable mitochondrial chaperone BCS1-B	-3.10952
Cc01_g12310	GSCOC_T00028162001	Beta-Amyrin Synthase 2	-3.10939
Cc10_g06860	GSCOC_T00034603001	Uncharacterized protein	-3.1081
Cc06_g15980	GSCOC_T00030750001	18 kDa seed maturation	-3.10733
Cc07_g14960	GSCOC_T00036548001	UDP-glycosyltransferase 85A3	-3.1048
Cc03_g13490	GSCOC_T00018978001	G-type lectin S-receptor-like serine threonine- kinase At5g24080	-3.10044
Cc00_g13460	GSCOC_T00010142001	Hydroxysteroid 11-beta-dehydrogenase 1 B	-3.08991
Cc02_g25400	GSCOC_T00028750001	Rac-like GTP-binding ARAC3	-3.08936
Cc00_g13800	GSCOC_T00013305001	Glucan endo-	-3.08895
Cc06_g04630	GSCOC_T00042976001	UDP-glycosyltransferase 73C4	-3.08836
Cc05_g15530	GSCOC_T00038681001	Probable galactinol--sucrose galactosyltransferase 1	-3.08803
Cc07_g12880	GSCOC_T00036820001	B3 domain-containing REM15	-3.08712
Cc02_g17760	GSCOC_T00014302001	Uncharacterized protein	-3.08555
Cc07_g06520	GSCOC_T00039962001	Uncharacterized protein	-3.08541
Cc11_g06920	GSCOC_T00020727001	late blight resistance homolog R1B-17	-3.08334
Cc02_g36410	GSCOC_T00003927001	Cytochrome P450 76C2	-3.08333
Cc04_g06970	GSCOC_T00022498001	Uncharacterized protein	-3.08309
Cc01_g11080	GSCOC_T00024226001	Transcription initiation factor TFIID subunit 9	-3.08302
Cc06_g09860	GSCOC_T00041858001	Rho guanine nucleotide exchange factor 8	-3.08156
Cc04_g08070	GSCOC_T00022655001	Tropinone reductase homolog At1g07440	-3.07865
Cc03_g12990	GSCOC_T00030623001	Uncharacterized protein	-3.07513
Cc01_g20580	GSCOC_T00015916001	Glutathione S-transferase	-3.07496
Cc08_g01090	GSCOC_T00038431001	LRR receptor-like serine threonine- kinase ERECTA	-3.07316
Cc01_g14280	GSCOC_T00028424001	serine threonine- kinase CCR3	-3.07101
Cc11_g06700	GSCOC_T00020695001	MACPF domain-containing At1g14780	-3.06964
Cc01_g13200	GSCOC_T00028283001	Zinc transporter 1	-3.06856
Cc11_g00790	GSCOC_T00019754001	Leucine-rich repeat receptor-like serine threonine- kinase At1g17230	-3.06742
Cc02_g36660	GSCOC_T00003895001	Uncharacterized protein	-3.06585
Cc03_g10010	GSCOC_T00031000001	Rho GDP-dissociation inhibitor	-3.06543
Cc06_g13880	GSCOC_T00041335001	RING-H2 finger ATL70	-3.06532
Cc06_g15430	GSCOC_T00030829001	Acidic mammalian chitinase	-3.06119
Cc00_g25170	GSCOC_T00012942001	1-aminocyclopropane-1-carboxylate oxidase 4	-3.05809
Cc10_g07410	GSCOC_T00034525001	Probable trehalose-phosphate phosphatase E	-3.05439
Cc07_g19310	GSCOC_T00018605001	-like 2	-3.05279
Cc01_g09140	GSCOC_T00023958001	Serine carboxypeptidase-like 2	-3.05264
Cc05_g12470	GSCOC_T00021188001	Probable inactive beta-glucosidase 14	-3.05123
Cc00_g02490	GSCOC_T00010286001	Metal tolerance 5	-3.04851
Cc07_g04930	GSCOC_T00039754001	Uncharacterized protein	-3.04756
Cc00_g21480	GSCOC_T00011324001	Receptor kinase	-3.04218
Cc09_g02630	GSCOC_T00017651001	RNA-binding 24	-3.04089
Cc06_g12630	GSCOC_T00041513001	Respiratory burst oxidase homolog E	-3.03891
Cc05_g01730	GSCOC_T00015749001	GDSL esterase lipase At1g71250	-3.03887
Cc00_g30680	GSCOC_T00008178001	UDP-glycosyltransferase 85A3	-3.03738
Cc02_g02900	GSCOC_T00020159001	O-glucosyltransferase rumi homolog	-3.03323
Cc04_g06960	GSCOC_T00022497001	LEAF RUST 10 DISEASE-RESISTANCE LOCUS RECEPTOR-LIKE PROTEIN KINASE-like	-3.03123
Cc02_g28450	GSCOC_T00009425001	Bifunctional dihydroflavonol 4-reductase flavanone 4-reductase	-3.02877
Cc01_g19660	GSCOC_T00016030001	Basic 7S globulin	-3.02865
Cc03_g07060	GSCOC_T00026542001	Serine incorporator 3	-3.02607
Cc09_g01740	GSCOC_T00017770001	Uncharacterized protein At5g41620	-3.02208
Cc07_g12360	GSCOC_T00036884001	Probable L-type lectin-domain containing receptor kinase	-3.01941
Cc05_g16100	GSCOC_T00038605001	RING finger B	-3.0119
Cc01_g09240	GSCOC_T00023971001	Serine carboxypeptidase-like 2	-3.01142
Cc09_g09080	GSCOC_T00023109001	Purine permease 21	-3.01114
Cc01_g12960	GSCOC_T00028253001	Expansin-A4	-3.00715
Cc03_g08140	GSCOC_T00033206001	Reticulon B13	-3.00713
Cc07_g06320	GSCOC_T00039933001	Uncharacterized protein At4g06744	-2.99877
Cc11_g00410	GSCOC_T00019481001	Acidic endochitinase	-2.99472
Cc06_g01530	GSCOC_T00023375001	Glycerol-3-phosphate 2-O-acyltransferase 6	-2.99163
Cc06_g08540	GSCOC_T00031119001	NADP-dependent alkenal double bond reductase P2	-2.99041
Cc00_g31330	GSCOC_T00004273001	O-acyltransferase WSD1	-2.98905
Cc08_g04100	GSCOC_T00034216001	Topless-related 2	-2.98675
Cc00_g31080	GSCOC_T00005377001	Disease resistance RPP13 4	-2.98607
Cc00_g28750	GSCOC_T00009574001	Gibberellin 20 oxidase 1-B	-2.97778
Cc11_g10730	GSCOC_T00032540001	Probable transmembrane ascorbate ferrireductase 4	-2.97565
Cc07_g07060	GSCOC_T00040040001	BTB POZ domain-containing At3g49900	-2.97411
Cc10_g11750	GSCOC_T00031846001	Laccase-13	-2.97285
Cc07_g05920	GSCOC_T00039880001	Uncharacterized membrane At3g27390	-2.97105
Cc06_g00650	GSCOC_T00023252001	D-alanine--D-alanine ligase A	-2.97094
Cc05_g09960	GSCOC_T00021519001	CASP 2A1	-2.966
Cc05_g16410	GSCOC_T00038564001	54S ribosomal mitochondrial	-2.96383
Cc07_g01760	GSCOC_T00039352001	Denticleless homolog	-2.95323
Cc00_g18470	GSCOC_T00011150001	G-type lectin S-receptor-like serine threonine- kinase B120	-2.94597
Cc01_g01210	GSCOC_T00037967001	Disease resistance response 206	-2.94308
Cc10_g12880	GSCOC_T00035372001	Uncharacterized protein	-2.94216
Cc02_g14920	GSCOC_T00013918001	Endoribonuclease Dicer homolog 2	-2.93414
Cc00_g03970	GSCOC_T00013722001	UTP--glucose-1-phosphate uridylyltransferase 1	-2.92499
Cc03_g10930	GSCOC_T00042035001	Cytochrome P450 71A2	-2.92433
Cc11_g04330	GSCOC_T00001353001	Uncharacterized protein	-2.91714
Cc06_g02570	GSCOC_T00023514001	Expansin-A6	-2.91211
Cc02_g28730	GSCOC_T00009469001	disease resistance RPP13 1	-2.91096
Cc05_g04240	GSCOC_T00031632001	Uncharacterized protein	-2.90881
Cc07_g12350	GSCOC_T00036885001	10-deacetylbaccatin III 10-O-acetyltransferase	-2.90407
Cc09_g00690	GSCOC_T00017914001	Inositol transporter 4	-2.89443
Cc00_g22290	GSCOC_T00006006001	GEM 4	-2.89162
Cc06_g15450	GSCOC_T00030823001	Receptor-like serine threonine- kinase SD1-7	-2.88598
Cc06_g16700	GSCOC_T00030649001	Uncharacterized protein	-2.88539
Cc02_g12000	GSCOC_T00029344001	G-type lectin S-receptor-like serine threonine- kinase RKS1	-2.8829
Cc00_g13280	GSCOC_T00009821001	Disease resistance At4g27190	-2.88282
Cc06_g13580	GSCOC_T00041376001	UDP-glycosyltransferase 78D2	-2.88249
Cc11_g01380	GSCOC_T00019574001	Uncharacterized protein	-2.87399
Cc07_g07690	GSCOC_T00040128001	Kinesin KIF18B	-2.87241
Cc00_g05640	GSCOC_T00011948001	amidase	-2.87192
Cc00_g27590	GSCOC_T00007291001	Kirola	-2.86705
Cc06_g20860	GSCOC_T00015859001	Uncharacterized protein	-2.866
Cc08_g11410	GSCOC_T00027142001	Expansin-like B1	-2.8654
Cc02_g15400	GSCOC_T00013986001	Probable LRR receptor-like serine threonine- kinase At5g45780	-2.86138
Cc01_g07400	GSCOC_T00030176001	Alcohol dehydrogenase-like 7	-2.86083
Cc02_g08370	GSCOC_T00029800001	Receptor kinase THESEUS 1	-2.8586
Cc10_g16020	GSCOC_T00033809001	Splicing factor 3B subunit 4	-2.85721
Cc04_g02380	GSCOC_T00021909001	GDSL esterase lipase APG	-2.85668
Cc06_g20580	GSCOC_T00023002001	Inactive ubiquitin carboxyl-terminal hydrolase 54	-2.85648
Cc08_g10200	GSCOC_T00026981001	Probable LRR receptor-like serine threonine- kinase At3g47570	-2.85578
Cc02_g18410	GSCOC_T00014384001	Methylthioribose kinase	-2.84806
Cc01_g19400	GSCOC_T00016062001	Ent-copalyl diphosphate chloroplastic	-2.83341
Cc10_g05360	GSCOC_T00034818001	Isoflavone 2 -hydroxylase	-2.82746
Cc11_g09690	GSCOC_T00032687001	Reticulon B9	-2.82233
Cc11_g01710	GSCOC_T00019529001	Probable boron transporter 6	-2.82053
Cc09_g07670	GSCOC_T00036221001	Wall-associated receptor kinase 5	-2.82013
Cc08_g03110	GSCOC_T00037821001	Anthocyanin regulatory C1	-2.818
Cc10_g09830	GSCOC_T00031494001	Villin-3	-2.8172
Cc01_g12090	GSCOC_T00028131001	leucine-rich repeat receptor kinase At2g19210	-2.8143
Cc02_g15270	GSCOC_T00013968001	Probable LRR receptor-like serine threonine- kinase At3g47570	-2.81197
Cc04_g01940	GSCOC_T00021859001	HOTHEAD	-2.80963
Cc00_g17320	GSCOC_T00001369001	UDP-3-O-acylglucosamine N-acyltransferase	-2.80593
Cc08_g16530	GSCOC_T00035616001	Transcription factor MYB4	-2.80326
Cc02_g25420	GSCOC_T00028748001	Cytochrome P450 734A1	-2.80321
Cc06_g07510	GSCOC_T00031252001	Uncharacterized protein	-2.80218
Cc11_g08090	GSCOC_T00032922001	PLANT CADMIUM RESISTANCE 2	-2.80114
Cc06_g05630	GSCOC_T00043122001	Uncharacterized protein	-2.79904
Cc02_g27850	GSCOC_T00025137001	Uncharacterized protein	-2.79708
Cc00_g29900	GSCOC_T00007323001	Inactive rhomboid 1	-2.79672
Cc03_g04040	GSCOC_T00026109001	Probable RNA helicase SDE3	-2.79646
Cc06_g19200	GSCOC_T00028972001	Vesicular inhibitory amino acid transporter	-2.79192
Cc00_g20010	GSCOC_T00008214001	Uncharacterized protein	-2.79148
Cc00_g29960	GSCOC_T00012067001	Uncharacterized protein	-2.78884
Cc07_g15540	GSCOC_T00036462001	Low affinity sulfate transporter 3	-2.78802
Cc00_g25530	GSCOC_T00008670001	L-ascorbate oxidase homolog	-2.78618
Cc00_g09280	GSCOC_T00012314001	Disease resistance RPM1	-2.78271
Cc02_g15570	GSCOC_T00014011001	Uncharacterized protein	-2.78205
Cc02_g17580	GSCOC_T00014277001	Uncharacterized protein At1g01500	-2.78106
Cc00_g30720	GSCOC_T00002466001	Uncharacterized protein	-2.78038
Cc06_g13700	GSCOC_T00041357001	Probable receptor-like serine threonine- kinase At5g57670	-2.7786
Cc00_g19980	GSCOC_T00001485001	Wall-associated receptor kinase-like 1	-2.77708
Cc07_g15640	GSCOC_T00036452001	Heavy metal-associated isoprenylated plant 26	-2.77568
Cc01_g14500	GSCOC_T00028449001	chloroplastic	-2.77471
Cc04_g13950	GSCOC_T00035912001	Disease resistance RPP8	-2.77394
Cc02_g11510	GSCOC_T00029403001	MLO 6	-2.76737
Cc02_g16970	GSCOC_T00014199001	Endoglucanase 24	-2.76578
Cc08_g05060	GSCOC_T00042453001	Uncharacterized protein	-2.76491
Cc11_g17410	GSCOC_T00038308001	NAC transcription factor 29	-2.76434
Cc02_g05420	GSCOC_T00039050001	Expansin-A4	-2.76128
Cc04_g17210	GSCOC_T00035859001	ABC transporter A family member 2	-2.76007
Cc01_g11120	GSCOC_T00024230001	Uncharacterized protein	-2.75797
Cc04_g14280	GSCOC_T00001598001	Alpha-galactosidase	-2.75656
Cc07_g16350	GSCOC_T00037571001	Cytochrome P450 86B1	-2.74446
Cc09_g07450	GSCOC_T00036255001	Reticuline oxidase	-2.744
Cc02_g17140	GSCOC_T00014220001	Purple acid phosphatase 2	-2.74281
Cc04_g01570	GSCOC_T00021813001	NADH dehydrogenas	-2.74142
Cc09_g06090	GSCOC_T00033364001	LRR receptor-like serine threonine- kinase EFR	-2.74049
Cc10_g13870	GSCOC_T00035226001	Probable LRR receptor-like serine threonine- kinase At2g16250	-2.7403
Cc00_g23340	GSCOC_T00012065001	O-acyltransferase WSD1	-2.74023
Cc07_g08120	GSCOC_T00040175001	Acyl- --sterol O-acyltransferase 1	-2.73977
Cc04_g10950	GSCOC_T00008913001	Major allergen Pru ar 1	-2.73885
Cc02_g27420	GSCOC_T00025072001	Histone	-2.73616
Cc09_g03590	GSCOC_T00017527001	Uncharacterized protein	-2.73575
Cc00_g19970	GSCOC_T00001484001	Wall-associated receptor kinase-like 2	-2.73133
Cc07_g17500	GSCOC_T00037422001	G-type lectin S-receptor-like serine threonine- kinase RLK1	-2.73109
Cc00_g27060	GSCOC_T00012723001	Uncharacterized protein	-2.73047
Cc05_g03500	GSCOC_T00033572001	ASPARTIC PROTEASE IN GUARD CELL 1	-2.73017
Cc02_g16370	GSCOC_T00014121001	Thaumatin	-2.73002
Cc00_g28570	GSCOC_T00006766001	Uncharacterized protein	-2.72661
Cc07_g12480	GSCOC_T00036867001	Probable acyl-activating enzyme 6	-2.72534
Cc06_g06480	GSCOC_T00031377001	Exocyst complex component 7	-2.71829
Cc09_g10800	GSCOC_T00041000001	Uncharacterized protein	-2.71632
Cc09_g02660	GSCOC_T00017646001	G-type lectin S-receptor-like serine threonine- kinase At1g11303	-2.71443
Cc06_g16930	GSCOC_T00004149001	Nuclear transcription factor Y subunit A-7	-2.71398
Cc01_g12150	GSCOC_T00028139001	3-ketoacyl- synthase 3	-2.71253
Cc00_g34700	GSCOC_T00012667001	Glycine-rich RNA-binding GRP1A	-2.70797
Cc00_g15320	GSCOC_T00009839001	disease resistance RGA4	-2.70681
Cc02_g19060	GSCOC_T00014469001	CBS domain-containing chloroplastic	-2.70527
Cc11_g16490	GSCOC_T00038189001	ABC transporter C family member 3	-2.70313
Cc09_g06500	GSCOC_T00005101001	Uncharacterized protein	-2.70247
Cc11_g13780	GSCOC_T00032138001	Exocyst complex component 8	-2.70148
Cc02_g09130	GSCOC_T00029699001	SSXT	-2.70144
Cc03_g09950	GSCOC_T00030988001	Probable aldo-keto reductase 2	-2.69994
Cc08_g10040	GSCOC_T00026962001	Uncharacterized protein	-2.69611
Cc06_g22450	GSCOC_T00005214001	Cytochrome P450 83B1	-2.69588
Cc05_g10420	GSCOC_T00021444001	Uncharacterized protein	-2.69454
Cc02_g19960	GSCOC_T00014576001	Cyclin-D4-1	-2.69378
Cc08_g13950	GSCOC_T00030283001	Uncharacterized protein	-2.69347
Cc06_g19030	GSCOC_T00028945001	NADPH-dependent oxidoreductase 2-alkenal reductase	-2.69076
Cc00_g30700	GSCOC_T00001607001	Receptor kinase	-2.68987
Cc06_g02430	GSCOC_T00023499001	Laccase-17	-2.68486
Cc09_g04300	GSCOC_T00017443001	NADP-dependent alkenal double bond reductase P2	-2.68119
Cc06_g13200	GSCOC_T00041432001	Replication factor A 2	-2.67828
Cc01_g00640	GSCOC_T00011050001	Uncharacterized protein	-2.67483
Cc00_g24260	GSCOC_T00004189001	Cytochrome P450 716B1	-2.67028
Cc06_g20890	GSCOC_T00015853001	Dihydroneopterin aldolase	-2.66994
Cc02_g28650	GSCOC_T00009455001	disease resistance At3g14460	-2.66354
Cc05_g09230	GSCOC_T00002657001	HVA22 f	-2.66311
Cc10_g04090	GSCOC_T00034979001	Glutamate receptor	-2.6621
Cc05_g06880	GSCOC_T00042204001	Expansin-B17	-2.66199
Cc04_g00850	GSCOC_T00021711001	GDSL esterase lipase 5	-2.65874
Cc07_g08690	GSCOC_T00040256001	Uncharacterized protein	-2.65872
Cc00_g18740	GSCOC_T00008461001	G-type lectin S-receptor-like serine threonine- kinase RKS1	-2.65687
Cc01_g04240	GSCOC_T00039301001	UDP-glycosyltransferase 92A1	-2.6553
Cc03_g07230	GSCOC_T00026566001	Probable pectate lyase 15	-2.65173
Cc00_g17550	GSCOC_T00012275001	Peroxidase 3	-2.64891
Cc02_g12040	GSCOC_T00029338001	G-type lectin S-receptor-like serine threonine- kinase SD1-1	-2.64632
Cc02_g02580	GSCOC_T00020116001	BAHD acyltransferase DCR	-2.64558
Cc06_g06380	GSCOC_T00031390001	Uncharacterized protein	-2.64468
Cc04_g17150	GSCOC_T00035849001	Tubulin alpha chain	-2.64462
Cc04_g12570	GSCOC_T00005322001	Short-chain dehydrogenase TIC chloroplastic	-2.64204
Cc08_g02700	GSCOC_T00037754001	Carboxylesterase 1	-2.64152
Cc10_g05400	GSCOC_T00034809001	Isoflavone 2 -hydroxylase	-2.64109
Cc02_g21960	GSCOC_T00014847001	Peroxidase 43	-2.63943
Cc00_g14300	GSCOC_T00010613001	Basic endochitinase	-2.63774
Cc08_g14470	GSCOC_T00030219001	O-glucosyltransferase rumi homolog	-2.63402
Cc00_g29350	GSCOC_T00010477001	Reticuline oxidase	-2.63287
Cc06_g12810	GSCOC_T00041492001	Probable pectinesterase pectinesterase inhibitor 54	-2.63164
Cc01_g21310	GSCOC_T00004994001	Probable beta-D-xylosidase 2	-2.62439
Cc11_g15650	GSCOC_T00038083001	Uncharacterized protein	-2.62431
Cc01_g21750	GSCOC_T00004943001	Uncharacterized protein	-2.6242
Cc00_g08270	GSCOC_T00003341001	Isoflavone reductase homolog A622	-2.62344
Cc11_g06180	GSCOC_T00020617001	ankyrin repeat RF_0381	-2.62236
Cc02_g07110	GSCOC_T00009473001	Uncharacterized protein	-2.62215
Cc11_g15460	GSCOC_T00038057001	Cysteine-rich receptor kinase 3	-2.62208
Cc03_g03130	GSCOC_T00025991001	Uncharacterized protein	-2.61923
Cc00_g07820	GSCOC_T00007023001	Uncharacterized protein	-2.60906
Cc01_g14490	GSCOC_T00028448001	chloroplastic	-2.60882
Cc11_g06570	GSCOC_T00020677001	vip1	-2.60644
Cc04_g09230	GSCOC_T00022806001	Pentatricopeptide repeat-containing mitochondrial	-2.60559
Cc08_g10270	GSCOC_T00026990001	Probable leucine-rich repeat receptor kinase At1g35710	-2.60404
Cc07_g03690	GSCOC_T00039613001	Transmembrane 230	-2.60355
Cc09_g05650	GSCOC_T00033436001	Probable LRR receptor-like serine threonine- kinase At3g47570	-2.60303
Cc06_g23230	GSCOC_T00040603001	Uncharacterized protein	-2.59683
Cc06_g06760	GSCOC_T00031344001	RING-H2 finger ATL71	-2.59645
Cc09_g01700	GSCOC_T00017774001	Peroxidase 42	-2.59518
Cc08_g08890	GSCOC_T00017226001	BURP domain-containing 3	-2.59325
Cc02_g03090	GSCOC_T00020181001	Branchpoint-bridging	-2.5917
Cc03_g05190	GSCOC_T00026267001	1-aminocyclopropane-1-carboxylate oxidase homolog 3	-2.59126
Cc08_g06540	GSCOC_T00036047001	Probable xyloglucan glycosyltransferase 8	-2.59032
Cc01_g08380	GSCOC_T00015544001	Lysosomal beta glucosidase	-2.58777
Cc02_g29760	GSCOC_T00038877001	disease resistance RGA3	-2.58734
Cc03_g12130	GSCOC_T00015283001	Zinc transporter 5	-2.58634
Cc00_g30490	GSCOC_T00007453001	UDP-rhamnose:rhamnosyltransferase 1	-2.58408
Cc01_g14960	GSCOC_T00016621001	F-box LRR-repeat 3	-2.58395
Cc00_g25520	GSCOC_T00008669001	Uncharacterized protein	-2.58074
Cc00_g16870	GSCOC_T00013631001	disease resistance RGA3	-2.58021
Cc08_g02690	GSCOC_T00037751001	Carboxylesterase 1	-2.58006
Cc01_g15440	GSCOC_T00016560001	B3 domain-containing At5g58280	-2.57687
Cc05_g04810	GSCOC_T00035017001	Uncharacterized protein	-2.5744
Cc02_g24650	GSCOC_T00028858001	Cyclin-U2-2	-2.57228
Cc02_g15820	GSCOC_T00014046001	Aquaporin NIP1-1	-2.57209
Cc08_g15670	GSCOC_T00035507001	Probable inactive receptor kinase At5g58300	-2.57161
Cc10_g13880	GSCOC_T00035225001	Probable inactive receptor kinase At1g65250	-2.57053
Cc07_g12770	GSCOC_T00036834001	Probable E3 ubiquitin- ligase HERC1	-2.56966
Cc02_g34300	GSCOC_T00000669001	Rac-like GTP-binding ARAC11	-2.56679
Cc00_g24460	GSCOC_T00004470001	Disease resistance At4g27190	-2.56315
Cc00_g17020	GSCOC_T00005618001	Uncharacterized protein	-2.56056
Cc03_g14190	GSCOC_T00031813001	Basic endochitinase	-2.55958
Cc01_g11400	GSCOC_T00024269001	MLO 3	-2.55682
Cc10_g07180	GSCOC_T00034556001	Uncharacterized protein	-2.54939
Cc04_g04400	GSCOC_T00022164001	Uncharacterized protein	-2.5493
Cc07_g16640	GSCOC_T00037537001	Probable LRR receptor-like serine threonine- kinase At2g16250	-2.54154
Cc07_g12220	GSCOC_T00036907001	3-hydroxy-3-methylglutaryl-coenzyme A reductase 1	-2.53887
Cc04_g04250	GSCOC_T00022147001	Ethylene-responsive transcription factor SHINE 3	-2.53515
Cc06_g22540	GSCOC_T00012882001	Disease resistance RPP8	-2.5339
Cc09_g08150	GSCOC_T00020752001	UDP-glycosyltransferase 85A2	-2.53378
Cc08_g02370	GSCOC_T00037708001	Deacetylvindoline O-acetyltransferase	-2.53082
Cc00_g15700	GSCOC_T00006886001	Monoglyceride lipase	-2.5302
Cc03_g10530	GSCOC_T00031072001	UDP-glycosyltransferase 92A1	-2.52811
Cc00_g06700	GSCOC_T00007497001	Dihydroflavonol 4-reductase	-2.52653
Cc06_g05040	GSCOC_T00043033001	Probable leucine-rich repeat receptor kinase At1g68400	-2.52268
Cc05_g11880	GSCOC_T00021258001	Uncharacterized protein	-2.52239
Cc08_g16510	GSCOC_T00035613001	Short-chain dehydrogenase TIC chloroplastic	-2.52078
Cc00_g05670	GSCOC_T00011952001	amidase	-2.5202
Cc07_g15160	GSCOC_T00036511001	Uncharacterized protein	-2.52017
Cc08_g17140	GSCOC_T00035703001	Uncharacterized protein	-2.5142
Cc11_g01390	GSCOC_T00019572001	Uncharacterized protein	-2.51108
Cc02_g24280	GSCOC_T00002343001	Spindle and kinetochore-associated 1 homolog	-2.50984
Cc02_g16600	GSCOC_T00014153001	Snakin-2	-2.50972
Cc06_g16940	GSCOC_T00004150001	Uncharacterized protein	-2.50594
Cc04_g02020	GSCOC_T00021867001	3-epi-6-deoxocathasterone 23-monooxygenase CYP90D1	-2.50227
Cc07_g11020	GSCOC_T00037047001	L-ascorbate peroxidase 3	-2.50221
Cc05_g10860	GSCOC_T00021388001	Probable leucine-rich repeat receptor-like serine threonine- kinase At3g14840	-2.50113
Cc07_g13570	GSCOC_T00036720001	Geranylgeranyl pyrophosphate chloroplastic	-2.4973
Cc02_g34360	GSCOC_T00000676001	Bifunctional epoxide hydrolase 2	-2.49165
Cc07_g14660	GSCOC_T00036583001	WEB family chloroplastic	-2.49103
Cc05_g14940	GSCOC_T00038756001	Fasciclin-like arabinogalactan 1	-2.48748
Cc05_g00120	GSCOC_T00017032001	Uncharacterized protein	-2.48728
Cc01_g02640	GSCOC_T00009669001	Villin-3	-2.48654
Cc09_g08500	GSCOC_T00020819001	Uncharacterized protein	-2.48639
Cc02_g02520	GSCOC_T00020108001	Uncharacterized protein	-2.48071
Cc00_g09260	GSCOC_T00012312001	Disease resistance RPM1	-2.47969
Cc09_g06440	GSCOC_T00005091001	MADS-box SOC1	-2.47884
Cc10_g14270	GSCOC_T00012017001	Pathogen-related	-2.47864
Cc00_g24420	GSCOC_T00006574001	Aspartic ase 1	-2.4783
Cc00_g30530	GSCOC_T00007195001	Cytochrome P450 71A1	-2.47793
Cc05_g10180	GSCOC_T00021492001	Chitobiosyldiphosphodolichol beta-mannosyltransferase	-2.47581
Cc08_g02900	GSCOC_T00037791001	Uncharacterized protein	-2.47317
Cc00_g35610	GSCOC_T00000461001	Ankyrin repeat-containing ITN1	-2.47223
Cc02_g14630	GSCOC_T00013881001	chloroplastic	-2.46959
Cc06_g05750	GSCOC_T00043140001	Heparanase 3	-2.46927
Cc09_g01680	GSCOC_T00017777001	Transcription factor CPC	-2.46833
Cc10_g10580	GSCOC_T00036010001	O-fucosyltransferase 1	-2.46708
Cc02_g13550	GSCOC_T00029133001	Transcriptional corepressor LEUNIG	-2.46038
Cc03_g03580	GSCOC_T00026050001	Linoleate 9S-lipoxygenase 5	-2.46006
Cc00_g09350	GSCOC_T00008789001	Cellulose synthase H1	-2.45875
Cc08_g16380	GSCOC_T00035596001	ABIL3	-2.45647
Cc02_g32100	GSCOC_T00018927001	40S ribosomal S29	-2.45618
Cc07_g14850	GSCOC_T00036561001	F-box FBW2	-2.45294
Cc01_g15210	GSCOC_T00016591001	Uncharacterized protein	-2.45104
Cc07_g12760	GSCOC_T00036835001	NAC domain-containing 74	-2.44774
Cc10_g00290	GSCOC_T00024477001	Uncharacterized protein	-2.44205
Cc02_g04640	GSCOC_T00020381001	Acid phosphatase 1	-2.43908
Cc03_g12360	GSCOC_T00015229001	Uncharacterized CRM domain-containing chloroplastic	-2.43705
Cc01_g01030	GSCOC_T00037997001	Uncharacterized protein	-2.43643
Cc00_g27500	GSCOC_T00007279001	Uncharacterized protein	-2.43595
Cc04_g00690	GSCOC_T00021692001	Pectinesterase 3	-2.43456
Cc07_g14950	GSCOC_T00036549001	UDP-glycosyltransferase 85A3	-2.43421
Cc00_g13760	GSCOC_T00013299001	Pectinesterase pectinesterase inhibitor PPE8B	-2.43317
Cc01_g08060	GSCOC_T00015493001	Uncharacterized protein	-2.43316
Cc06_g19740	GSCOC_T00029048001	Disease resistance At4g27190	-2.43
Cc01_g13990	GSCOC_T00028384001	Uncharacterized protein	-2.42802
Cc03_g08430	GSCOC_T00033260001	Uncharacterized protein	-2.42608
Cc10_g07230	GSCOC_T00034550001	Synaptonemal complex 1	-2.42588
Cc03_g11700	GSCOC_T00043189001	Uncharacterized protein	-2.42581
Cc09_g02650	GSCOC_T00017647001	G-type lectin S-receptor-like serine threonine- kinase At1g11303	-2.42346
Cc00_g27280	GSCOC_T00007367001	Probable pectate lyase 13	-2.42195
Cc04_g10730	GSCOC_T00042643001	DNA polymerase III subunit gamma tau	-2.42021
Cc02_g09500	GSCOC_T00029648001	Uncharacterized protein	-2.41875
Cc11_g02050	GSCOC_T00033035001	Probable disease resistance At1g58390	-2.41845
Cc04_g11360	GSCOC_T00037307001	High-affinity nitrate transporter	-2.41502
Cc00_g00940	GSCOC_T00041151001	Peroxidase 47	-2.41465
Cc00_g11000	GSCOC_T00000138001	Secologanin synthase	-2.41464
Cc01_g09200	GSCOC_T00023967001	Serine carboxypeptidase-like 2	-2.41418
Cc05_g13670	GSCOC_T00021032001	NEP1-interacting 1	-2.41411
Cc08_g16000	GSCOC_T00035548001	Endoglucanase 6	-2.4125
Cc10_g09420	GSCOC_T00031547001	Immune-associated nucleotide-binding 8	-2.4123
Cc03_g05790	GSCOC_T00026348001	Uncharacterized protein	-2.41059
Cc11_g14560	GSCOC_T00032042001	Probable xyloglucan endotransglucosylase hydrolase 33	-2.40956
Cc03_g06700	GSCOC_T00026484001	UPF0481 At3g47200	-2.40922
Cc06_g18490	GSCOC_T00040465001	GAST1	-2.4036
Cc05_g14040	GSCOC_T00038867001	Auxin-induced in root cultures 12	-2.40281
Cc06_g12080	GSCOC_T00041578001	Auxin-binding ABP20	-2.40253
Cc00_g00850	GSCOC_T00041131001	TMV resistance N	-2.39992
Cc09_g06900	GSCOC_T00005151001	LRR receptor-like serine threonine- kinase GSO1	-2.3991
Cc05_g12940	GSCOC_T00021123001	Indole-3-acetic acid-amido synthetase	-2.39889
Cc10_g02160	GSCOC_T00024714001	Floral homeotic DEFICIENS	-2.39865
Cc02_g33780	GSCOC_T00013091001	Probable linoleate 9S-lipoxygenase 5	-2.39782
Cc06_g00980	GSCOC_T00023304001	Ethylene-overproduction 1	-2.39665
Cc04_g08580	GSCOC_T00022722001	Uncharacterized protein	-2.39228
Cc03_g03650	GSCOC_T00026060001	Primary amine oxidase	-2.39085
Cc09_g00590	GSCOC_T00017928001	Uncharacterized protein	-2.38957
Cc00_g08050	GSCOC_T00001791001	Transcription factor MYB46	-2.38759
Cc02_g30790	GSCOC_T00023825001	Probable LRR receptor-like serine threonine- kinase At3g47570	-2.38386
Cc00_g19910	GSCOC_T00007589001	Uncharacterized protein	-2.38152
Cc03_g09810	GSCOC_T00030971001	Probable aldo-keto reductase 2	-2.38124
Cc04_g06720	GSCOC_T00022468001	Uncharacterized protein	-2.38116
Cc00_g19080	GSCOC_T00000779001	U11 U12 small nuclear ribonucleo 35 kDa	-2.37913
Cc03_g01280	GSCOC_T00025734001	Major allergen Pru ar 1	-2.37584
Cc03_g01760	GSCOC_T00025801001	Uncharacterized protein	-2.37469
Cc05_g01720	GSCOC_T00015748001	Uncharacterized protein	-2.37349
Cc03_g02920	GSCOC_T00025964001	chloroplastic	-2.37243
Cc04_g03320	GSCOC_T00022025001	IST1	-2.37169
Cc03_g00950	GSCOC_T00025694001	DELLA GAI1	-2.37097
Cc07_g04970	GSCOC_T00039758001	Dihydroflavonol 4-reductase	-2.36757
Cc02_g32690	GSCOC_T00001207001	Kinesin KIN-1	-2.36512
Cc11_g14660	GSCOC_T00032028001	Uncharacterized protein	-2.36476
Cc11_g06650	GSCOC_T00020689001	L-gulonolactone oxidase	-2.36438
Cc00_g15670	GSCOC_T00008808001	Omega-hydroxypalmitate O-feruloyl transferase	-2.36349
Cc06_g22460	GSCOC_T00005215001	Cytochrome P450 83B1	-2.36346
Cc10_g05430	GSCOC_T00034806001	Isoflavone 2 -hydroxylase	-2.36281
Cc02_g36510	GSCOC_T00003915001	Fasciclin-like arabinogalactan 8	-2.3621
Cc00_g33180	GSCOC_T00003246001	Endochitinase B	-2.36099
Cc06_g00560	GSCOC_T00023237001	Uncharacterized protein	-2.36035
Cc07_g03020	GSCOC_T00039516001	Auxin efflux carrier component 8	-2.35915
Cc05_g13960	GSCOC_T00020993001	homolog 5	-2.3562
Cc02_g19160	GSCOC_T00014480001	Polygalacturonase inhibitor 1	-2.35505
Cc02_g37480	GSCOC_T00027984001	Uncharacterized protein	-2.34849
Cc01_g01330	GSCOC_T00037926001	F-box FBD LRR-repeat At1g16930	-2.3396
Cc02_g10080	GSCOC_T00029568001	Cytochrome P450 77A2	-2.3343
Cc11_g10650	GSCOC_T00032550001	Transcription factor AIG1	-2.33382
Cc11_g06050	GSCOC_T00020588001	Ankyrin repeat-containing ITN1	-2.33357
Cc07_g12310	GSCOC_T00036890001	Diacylglycerol O-acyltransferase 2	-2.33351
Cc05_g09710	GSCOC_T00021548001	Uncharacterized protein	-2.33183
Cc06_g08580	GSCOC_T00031111001	NRT1 PTR FAMILY	-2.33132
Cc01_g04720	GSCOC_T00015822001	DNA damage-repair toleration DRT100	-2.32365
Cc02_g01590	GSCOC_T00019985001	Calcineurin B 7	-2.32245
Cc06_g16590	GSCOC_T00030665001	Lipase	-2.31845
Cc09_g10560	GSCOC_T00041031001	NAC domain-containing 94	-2.31842
Cc03_g05800	GSCOC_T00026349001	Long-chain-alcohol oxidase FAO1	-2.31811
Cc06_g14330	GSCOC_T00041270001	clathrin assembly At5g35200	-2.31706
Cc10_g05620	GSCOC_T00034786001	Uncharacterized protein	-2.31158
Cc01_g12220	GSCOC_T00028150001	Glutelin type-A 1	-2.31038
Cc03_g07820	GSCOC_T00026646001	Ankyrin repeat-containing At5g02620	-2.30762
Cc03_g01420	GSCOC_T00025754001	Uncharacterized protein	-2.30709
Cc04_g04620	GSCOC_T00022192001	Uncharacterized protein	-2.3066
Cc00_g13780	GSCOC_T00013301001	Probable saccharopine dehydrogenas	-2.30632
Cc04_g06870	GSCOC_T00022488001	Reticulon B9	-2.30487
Cc07_g06020	GSCOC_T00039894001	Uncharacterized protein At3g61260	-2.30102
Cc00_g09960	GSCOC_T00013628001	disease resistance RGA4	-2.29551
Cc04_g11080	GSCOC_T00037268001	Non-specific lipid-transfer	-2.29496
Cc05_g03980	GSCOC_T00031571001	Bifunctional epoxide hydrolase 2	-2.29487
Cc06_g09020	GSCOC_T00041974001	Potassium channel AKT1	-2.29435
Cc01_g05920	GSCOC_T00027420001	GAST1	-2.29405
Cc02_g38150	GSCOC_T00027901001	Cytochrome P450 86A2	-2.29394
Cc00_g28130	GSCOC_T00008593001	Disease resistance RPM1	-2.28999
Cc10_g13630	GSCOC_T00035258001	Probable calcium-binding CML44	-2.28932
Cc05_g12660	GSCOC_T00021161001	Uncharacterized protein	-2.28858
Cc01_g18550	GSCOC_T00016191001	Transcriptional regulator SUPERMAN	-2.28726
Cc10_g09050	GSCOC_T00034304001	IQ-DOMAIN 14	-2.28694
Cc06_g03300	GSCOC_T00023610001	Nuclear factor related to kappa-B-binding	-2.28477
Cc04_g04160	GSCOC_T00022136001	Uncharacterized protein	-2.28456
Cc02_g08260	GSCOC_T00029824001	Uncharacterized protein	-2.28452
Cc00_g34570	GSCOC_T00006097001	Cytochrome P450 71B36	-2.28236
Cc03_g16110	GSCOC_T00002122001	Cellulose synthase D5	-2.28203
Cc01_g08000	GSCOC_T00015486001	Kinesin KIF15	-2.27838
Cc05_g09090	GSCOC_T00002673001	late blight resistance homolog R1B-8	-2.27691
Cc07_g04320	GSCOC_T00039686001	Uncharacterized protein	-2.27586
Cc03_g06680	GSCOC_T00026482001	UPF0481 At3g47200	-2.27425
Cc08_g04700	GSCOC_T00042506001	Cyanidin-3-O-glucoside 2-O-glucuronosyltransferase	-2.27411
Cc10_g13010	GSCOC_T00035355001	Uncharacterized protein	-2.27211
Cc02_g11090	GSCOC_T00029455001	Probable serine threonine- kinase PBL19	-2.27121
Cc08_g09710	GSCOC_T00026917001	GATA transcription factor 12	-2.26971
Cc02_g33180	GSCOC_T00015335001	Formin 11	-2.26932
Cc08_g01020	GSCOC_T00038438001	2-hydroxymuconate semialdehyde hydrolase	-2.26847
Cc01_g07520	GSCOC_T00009387001	Probable inactive receptor kinase At5g10020	-2.26754
Cc04_g02410	GSCOC_T00021912001	Polyadenylate-binding 1-B	-2.26422
Cc02_g21350	GSCOC_T00014775001	UDP-glycosyltransferase 85A2	-2.26336
Cc11_g09560	GSCOC_T00032702001	Uncharacterized amino-acid permease	-2.26028
Cc11_g12310	GSCOC_T00032335001	Uncharacterized protein	-2.25943
Cc06_g03580	GSCOC_T00023643001	Uncharacterized protein	-2.25792
Cc05_g05520	GSCOC_T00035121001	Uncharacterized protein	-2.25538
Cc01_g08900	GSCOC_T00023928001	NAC domain-containing 90	-2.25515
Cc01_g14210	GSCOC_T00028416001	Uncharacterized protein	-2.25367
Cc01_g16120	GSCOC_T00016479001	Fimbrin-5	-2.2529
Cc09_g03070	GSCOC_T00017592001	Uncharacterized protein	-2.25103
Cc02_g24520	GSCOC_T00028876001	Malate cytoplasmic	-2.24933
Cc06_g03980	GSCOC_T00023699001	Phenylalanine ammonia-lyase	-2.2489
Cc06_g21860	GSCOC_T00015594001	NLP7	-2.24793
Cc03_g03480	GSCOC_T00026038001	Probable membrane-associated kinase regulator 1	-2.24189
Cc06_g09880	GSCOC_T00041856001	Probable ABIL5	-2.24186
Cc08_g00710	GSCOC_T00038478001	Phospholipase D alpha 1	-2.24
Cc09_g07370	GSCOC_T00036271001	Patellin-4	-2.23866
Cc02_g15280	GSCOC_T00013969001	Probable LRR receptor-like serine threonine- kinase At3g47570	-2.23777
Cc02_g12560	GSCOC_T00029268001	ADP-ribosylation factor GTPase-activating AGD5	-2.23509
Cc02_g17620	GSCOC_T00014282001	Glucan endo-	-2.23406
Cc00_g16690	GSCOC_T00012625001	Gibberellin 3-beta-dioxygenase 4	-2.23244
Cc07_g08950	GSCOC_T00040287001	GDT1 4	-2.22924
Cc10_g03280	GSCOC_T00024851001	Probable GMP synthas	-2.22865
Cc07_g10080	GSCOC_T00037161001	Peroxidase 72	-2.22831
Cc01_g21320	GSCOC_T00004993001	Probable beta-D-xylosidase 2	-2.22688
Cc05_g04270	GSCOC_T00031641001	Uncharacterized protein	-2.22605
Cc02_g36270	GSCOC_T00006336001	disease resistance RGA3	-2.22441
Cc00_g13910	GSCOC_T00006563001	Uncharacterized protein	-2.22251
Cc02_g11730	GSCOC_T00029377001	Cysteine-rich receptor kinase 10	-2.22192
Cc08_g13750	GSCOC_T00030308001	Uncharacterized protein	-2.22062
Cc00_g18130	GSCOC_T00010237001	Isoflavone 2 -hydroxylase	-2.21923
Cc01_g12770	GSCOC_T00028226001	Actin-11	-2.21714
Cc00_g28270	GSCOC_T00010422001	UDP-glycosyltransferase 75C1	-2.21601
Cc10_g02480	GSCOC_T00024752001	Omega-hydroxypalmitate O-feruloyl transferase	-2.21464
Cc08_g13240	GSCOC_T00030366001	Uncharacterized protein	-2.21158
Cc03_g03660	GSCOC_T00026061001	Primary amine oxidase	-2.2099
Cc08_g05890	GSCOC_T00024385001	Uncharacterized protein At1g28695	-2.20954
Cc06_g03060	GSCOC_T00023577001	Kinesin KIN-5C	-2.20698
Cc00_g17060	GSCOC_T00008777001	Probable xyloglucan endotransglucosylase hydrolase 28	-2.20588
Cc01_g16750	GSCOC_T00016404001	Uncharacterized protein	-2.20538
Cc01_g01960	GSCOC_T00019276001	Uncharacterized protein	-2.20478
Cc06_g22050	GSCOC_T00017139001	Cytochrome P450 83B1	-2.20401
Cc06_g04320	GSCOC_T00023747001	Uncharacterized protein	-2.20396
Cc11_g10740	GSCOC_T00032539001	Clavaminate synthase At3g21360	-2.20261
Cc03_g08520	GSCOC_T00033273001	late blight resistance homolog R1B-14	-2.19969
Cc02_g34040	GSCOC_T00000635001	Transcription factor bHLH18	-2.19737
Cc01_g20260	GSCOC_T00015954001	Uncharacterized protein	-2.19676
Cc00_g12750	GSCOC_T00001612001	Shikimate O-hydroxycinnamoyltransferase	-2.19459
Cc07_g11580	GSCOC_T00036986001	Probable acyl-activating enzyme peroxisomal	-2.19145
Cc05_g16530	GSCOC_T00038547001	PLASMODESMATA CALLOSE-BINDING PROTEIN 1	-2.19114
Cc03_g14380	GSCOC_T00026648001	Polygalacturonase At1g48100	-2.19112
Cc08_g15410	GSCOC_T00035470001	Probable membrane-associated kinase regulator 5	-2.19025
Cc07_g07560	GSCOC_T00040106001	Probable xyloglucan endotransglucosylase hydrolase 6	-2.18973
Cc08_g14880	GSCOC_T00035399001	Cytochrome P450 86A2	-2.18877
Cc05_g06090	GSCOC_T00009860001	Formin 5	-2.1864
Cc06_g00580	GSCOC_T00023241001	Transcription factor SCREAM2	-2.18396
Cc03_g06540	GSCOC_T00026450001	F-box CPR1	-2.18277
Cc07_g20150	GSCOC_T00033940001	Lysine-specific demethylase 3B	-2.17846
Cc02_g27930	GSCOC_T00025150001	Transcription factor MYB46	-2.17705
Cc00_g17330	GSCOC_T00001370001	NDR1	-2.17614
Cc05_g04860	GSCOC_T00035023001	Sigma intracellular receptor 2	-2.17562
Cc02_g34690	GSCOC_T00000730001	Uncharacterized protein	-2.17539
Cc09_g03670	GSCOC_T00017517001	Isopentenyl-diphosphate Delta-isomerase II	-2.17538
Cc05_g08050	GSCOC_T00016813001	RING-H2 finger ATL2	-2.17515
Cc07_g06280	GSCOC_T00039927001	Uncharacterized protein At4g06744	-2.17155
Cc02_g10130	GSCOC_T00029562001	Uncharacterized protein At1g03900	-2.16963
Cc00_g29400	GSCOC_T00008190001	Uncharacterized protein	-2.16785
Cc11_g02580	GSCOC_T00025570001	Inactive leucine-rich repeat receptor-like serine threonine- kinase At1g60630	-2.16563
Cc02_g26510	GSCOC_T00024948001	disease resistance RGA3	-2.16481
Cc07_g10490	GSCOC_T00037109001	Kinesin-related 11	-2.16429
Cc08_g10430	GSCOC_T00027010001	Pollen-specific SF21	-2.16411
Cc05_g00500	GSCOC_T00017087001	DETOXIFICATION 41	-2.1614
Cc10_g05340	GSCOC_T00034821001	Isoflavone 2 -hydroxylase	-2.16074
Cc08_g01880	GSCOC_T00037641001	UMP-CMP kinase 3	-2.16038
Cc05_g04330	GSCOC_T00031655001	L-ascorbate oxidase homolog	-2.15666
Cc00_g10230	GSCOC_T00006743001	Gibberellin 3-beta-dioxygenase 4	-2.15573
Cc01_g03760	GSCOC_T00040931001	Cytochrome P450 81D1	-2.15535
Cc02_g11990	GSCOC_T00029345001	G-type lectin S-receptor-like serine threonine- kinase B120	-2.15469
Cc05_g01590	GSCOC_T00018255001	Endo-	-2.15453
Cc11_g16480	GSCOC_T00038188001	Mitotic spindle checkpoint MAD2	-2.15185
Cc07_g08480	GSCOC_T00040222001	Zinc finger CCCH domain-containing 15	-2.15108
Cc01_g02930	GSCOC_T00013234001	G-type lectin S-receptor-like serine threonine- kinase SD1-13	-2.15043
Cc03_g02370	GSCOC_T00025879001	Uncharacterized protein	-2.15033
Cc05_g13310	GSCOC_T00021078001	Thiamine thiazole synthase chloroplastic	-2.14708
Cc00_g00060	GSCOC_T00036077001	Cycloartenol synthase 2	-2.14635
Cc02_g15130	GSCOC_T00013948001	MALE DISCOVERER 1	-2.14557
Cc01_g19450	GSCOC_T00016056001	Cyclin-P3-1	-2.14519
Cc02_g33870	GSCOC_T00008631001	Origin recognition complex subunit 1	-2.14377
Cc10_g12480	GSCOC_T00031960001	Cyclin-A1-1	-2.14211
Cc06_g07270	GSCOC_T00031285001	Uncharacterized protein	-2.14187
Cc10_g03140	GSCOC_T00024835001	Cytochrome P450 734A1	-2.14103
Cc06_g03960	GSCOC_T00023697001	Cytokinin riboside 5 -monophosphate phosphoribohydrolase LOG1	-2.14066
Cc01_g04320	GSCOC_T00004449001	Lysosomal Pro-X carboxypeptidase	-2.13928
Cc05_g13360	GSCOC_T00021073001	Early nodulin 3	-2.13762
Cc11_g09810	GSCOC_T00032667001	Uncharacterized protein	-2.13725
Cc02_g10090	GSCOC_T00029567001	receptor kinase At5g39000	-2.13408
Cc11_g06780	GSCOC_T00020704001	Receptor 12	-2.13251
Cc01_g14050	GSCOC_T00028393001	Cell division control 6 homolog	-2.13071
Cc01_g09150	GSCOC_T00023960001	Serine carboxypeptidase-like 19	-2.12798
Cc05_g09640	GSCOC_T00021558001	Probable receptor kinase At2g42960	-2.12765
Cc02_g04030	GSCOC_T00020306001	Uncharacterized protein	-2.12732
Cc02_g07010	GSCOC_T00039257001	Proliferating cell nuclear antigen large form	-2.12695
Cc08_g09450	GSCOC_T00026884001	UPF0481 At3g02645	-2.12677
Cc00_g20030	GSCOC_T00008216001	Uncharacterized protein	-2.12602
Cc11_g09530	GSCOC_T00032706001	Zinc finger CCCH domain-containing 15	-2.12568
Cc06_g03490	GSCOC_T00023633001	L-ascorbate peroxidase cytosolic	-2.12317
Cc01_g14200	GSCOC_T00028415001	EARLY FLOWERING 4	-2.12121
Cc01_g20620	GSCOC_T00015911001	indole-3-acetic acid-amido synthetase	-2.12059
Cc02_g24440	GSCOC_T00028885001	SPX domain-containing 3	-2.12011
Cc03_g13550	GSCOC_T00018990001	Bifunctional dihydroflavonol 4-reductase flavanone 4-reductase	-2.12008
Cc09_g05620	GSCOC_T00033440001	Probable LRR receptor-like serine threonine- kinase At3g47570	-2.11996
Cc01_g09890	GSCOC_T00024060001	Glucomannan 4-beta-mannosyltransferase 2	-2.11923
Cc01_g07260	GSCOC_T00030158001	2 -deoxymugineic-acid 2 -dioxygenase	-2.11765
Cc10_g00150	GSCOC_T00024453001	Calvin cycle CP12- chloroplastic	-2.11725
Cc07_g15430	GSCOC_T00036477001	Epidermis-specific secreted glyco EP1	-2.11678
Cc01_g01200	GSCOC_T00037968001	Disease resistance response 206	-2.11461
Cc03_g09600	GSCOC_T00030944001	Transcription factor bHLH77	-2.11205
Cc07_g12730	GSCOC_T00036838001	Sucrose synthase 2	-2.11151
Cc02_g03270	GSCOC_T00020203001	Homeobox-leucine zipper ANTHOCYANINLESS 2	-2.11096
Cc06_g11400	GSCOC_T00041664001	Peroxisomal N(1)-acetyl-spermine spermidine oxidase	-2.11062
Cc06_g08040	GSCOC_T00031181001	Uncharacterized protein	-2.1099
Cc03_g03140	GSCOC_T00025993001	Heavy metal-associated isoprenylated plant 26	-2.10943
Cc05_g12640	GSCOC_T00021163001	Uncharacterized protein	-2.10781
Cc03_g11710	GSCOC_T00043190001	Uncharacterized protein	-2.10677
Cc00_g31870	GSCOC_T00001691001	Glutathione transferase GST 23	-2.10612
Cc05_g08860	GSCOC_T00016921001	Secologanin synthase	-2.10554
Cc02_g01580	GSCOC_T00019984001	Calcineurin B 4	-2.10521
Cc01_g16270	GSCOC_T00016461001	Asparagine--tRNA cytoplasmic 2	-2.10513
Cc08_g12770	GSCOC_T00030433001	14 kDa proline-rich	-2.1051
Cc05_g07760	GSCOC_T00016777001	Receptor kinase 5	-2.10391
Cc10_g00750	GSCOC_T00024533001	Alcohol dehydrogenase-like 7	-2.10363
Cc02_g10370	GSCOC_T00029536001	Bark storage A	-2.10238
Cc02_g15470	GSCOC_T00013995001	LRR receptor-like serine threonine- kinase RCH1	-2.10086
Cc10_g15010	GSCOC_T00033663001	Cellulose synthase A catalytic subunit	-2.10032
Cc03_g14800	GSCOC_T00026722001	late blight resistance homolog R1B-17	-2.10011
Cc02_g22430	GSCOC_T00014914001	E3 ubiquitin- ligase RING1-like	-2.09902
Cc02_g17410	GSCOC_T00014253001	Laccase-11	-2.09581
Cc02_g02630	GSCOC_T00020123001	Short-chain dehydrogenase TIC chloroplastic	-2.09506
Cc07_g10720	GSCOC_T00037082001	Uncharacterized protein	-2.09335
Cc09_g00150	GSCOC_T00017985001	Uncharacterized protein	-2.09133
Cc08_g05690	GSCOC_T00024356001	Polyubiquitin	-2.0905
Cc03_g16270	GSCOC_T00002100001	Uncharacterized protein	-2.09048
Cc03_g14630	GSCOC_T00026688001	late blight resistance homolog R1A-6	-2.08981
Cc03_g05130	GSCOC_T00026258001	DNA repair RAD5B	-2.08881
Cc07_g18680	GSCOC_T00018716001	disease resistance At4g10780	-2.08854
Cc11_g07040	GSCOC_T00018115001	Nudix hydrolase mitochondrial	-2.08847
Cc11_g08050	GSCOC_T00032927001	Glucan endo-	-2.08833
Cc01_g08480	GSCOC_T00006217001	Aspartic ase nepenthesin-1	-2.08789
Cc08_g02860	GSCOC_T00037785001	Uncharacterized protein	-2.08438
Cc08_g02650	GSCOC_T00037746001	Probable carboxylesterase 120	-2.08042
Cc03_g05300	GSCOC_T00026279001	Deacetoxyvindoline 4-hydroxylase	-2.07996
Cc10_g07020	GSCOC_T00034583001	Probable LRR receptor-like serine threonine- kinase At1g06840	-2.07925
Cc10_g07520	GSCOC_T00034512001		-2.07629
Cc04_g17030	GSCOC_T00035825001	pectinesterase pectinesterase inhibitor 26	-2.07444
Cc00_g27010	GSCOC_T00011934001	UDP-glucuronate 4-epimerase 1	-2.07342
Cc11_g07610	GSCOC_T00018027001	Cytochrome P450 716B2	-2.0717
Cc07_g11510	GSCOC_T00036993001	IST1	-2.07165
Cc09_g07430	GSCOC_T00036260001	Reticuline oxidase	-2.06964
Cc05_g02150	GSCOC_T00018412001	Disease resistance At4g27190	-2.06909
Cc00_g02080	GSCOC_T00001841001	disease resistance At1g63350	-2.0688
Cc04_g12090	GSCOC_T00005253001	Uncharacterized protein	-2.06856
Cc08_g15090	GSCOC_T00035433001	Uncharacterized protein	-2.06836
Cc02_g16640	GSCOC_T00014157001	Probable aquaporin PIP-type pTOM75	-2.06412
Cc01_g12070	GSCOC_T00028128001	Uncharacterized protein	-2.06175
Cc08_g14240	GSCOC_T00030249001	Thaumatin	-2.06164
Cc06_g14060	GSCOC_T00041306001	Uncharacterized protein	-2.0607
Cc02_g34390	GSCOC_T00000680001	pectinesterase pectinesterase inhibitor 22	-2.06036
Cc06_g02360	GSCOC_T00023490001	Thaumatin	-2.05991
Cc01_g17850	GSCOC_T00016274001	Plasmodesmata-located 2	-2.05922
Cc02_g29780	GSCOC_T00038881001	Uncharacterized protein	-2.05891
Cc02_g21770	GSCOC_T00014823001	Heavy metal-associated isoprenylated plant 26	-2.05743
Cc08_g05710	GSCOC_T00024360001	Ubiquitin-60S ribosomal L40	-2.05428
Cc04_g12160	GSCOC_T00005262001	Wall-associated receptor kinase 3	-2.05391
Cc00_g22640	GSCOC_T00008883001	Auxin-induced 15A	-2.05317
Cc05_g01830	GSCOC_T00015769001	Uncharacterized protein	-2.05265
Cc03_g14210	GSCOC_T00031815001	Basic endochitinase	-2.04712
Cc00_g07440	GSCOC_T00008319001	Probable LRR receptor-like serine threonine- kinase At2g16250	-2.04628
Cc02_g12700	GSCOC_T00029249001	Uncharacterized protein	-2.04624
Cc01_g07480	GSCOC_T00009395001	Uncharacterized protein	-2.04513
Cc07_g09010	GSCOC_T00040294001	Uncharacterized protein	-2.03796
Cc08_g04630	GSCOC_T00015666001	Palmitoleoyl- carboxylesterase NOTUM	-2.03421
Cc02_g32030	GSCOC_T00018911001	Probable serine threonine- kinase CST	-2.03243
Cc06_g05670	GSCOC_T00043129001	Germin subfamily 3 member 2	-2.03082
Cc02_g05550	GSCOC_T00039067001	Adenine guanine permease AZG1	-2.03073
Cc00_g30870	GSCOC_T00005393001	Apyrase	-2.03062
Cc05_g06200	GSCOC_T00042101001	Uncharacterized protein	-2.03061
Cc11_g07820	GSCOC_T00008239001	Ankyrin repeat-containing At5g02620	-2.03002
Cc03_g10990	GSCOC_T00042047001	Cytochrome P450 71A2	-2.02915
Cc11_g00810	GSCOC_T00019747001	Cysteine-rich receptor kinase 10	-2.02839
Cc04_g14040	GSCOC_T00035927001	Disease resistance RPP8	-2.02317
Cc05_g08570	GSCOC_T00016882001	Uncharacterized protein	-2.02189
Cc07_g05940	GSCOC_T00039882001	Uncharacterized protein	-2.02101
Cc01_g00020	GSCOC_T00012438001	Elongation factor P	-2.01988
Cc03_g01550	GSCOC_T00025770001	Uncharacterized protein	-2.01755
Cc07_g10200	GSCOC_T00037148001	Beta-galactosidase 3	-2.01583
Cc05_g04670	GSCOC_T00007008001	Probable esterase PIR7A	-2.01503
Cc03_g03940	GSCOC_T00026095001	Uncharacterized protein	-2.01349
Cc06_g23480	GSCOC_T00040562001	Leucine-rich repeat extensin 2	-2.01068
Cc11_g04020	GSCOC_T00034025001	late blight resistance homolog R1A-6	-2.00931
Cc09_g07150	GSCOC_T00036308001	Subtilisin-like protease	-2.00929
Cc09_g08670	GSCOC_T00020843001	BAG family molecular chaperone regulator 2	-2.00919
Cc01_g11610	GSCOC_T00028065001	LOB domain-containing 1	-2.00898
Cc04_g03500	GSCOC_T00022045001	Probable sulfate transporter	-2.00891
Cc00_g09450	GSCOC_T00008031001	Disease resistance RPM1	-2.00684
Cc02_g39450	GSCOC_T00027714001	ASPARTIC PROTEASE IN GUARD CELL 1	-2.0063
Cc02_g16350	GSCOC_T00014119001	Endo-	-2.00529
Cc02_g28750	GSCOC_T00018162001	disease resistance RPP13 1	-2.00482
Cc01_g17750	GSCOC_T00016287001	Uncharacterized protein	-1.99898
Cc02_g06210	GSCOC_T00039146001	LATERAL ORGAN BOUNDARIES	-1.99756
Cc06_g07460	GSCOC_T00031258001	Uncharacterized protein	-1.99755
Cc11_g16640	GSCOC_T00038205001	Remorin	-1.99506
Cc01_g14540	GSCOC_T00028456001	N-alpha-acetyltransferase 20	-1.99503
Cc04_g02760	GSCOC_T00021957001	Dehydration-responsive element-binding 3	-1.99502
Cc04_g02630	GSCOC_T00021938001	Flavonol synthase flavanone 3-hydroxylase	-1.99455
Cc00_g28310	GSCOC_T00005346001	disease resistance RGA1	-1.99328
Cc02_g03150	GSCOC_T00020187001	Uncharacterized protein	-1.99171
Cc11_g01760	GSCOC_T00019521001	Uncharacterized protein	-1.99054
Cc03_g14570	GSCOC_T00026675001	Disease resistance RPP13 4	-1.9899
Cc05_g14580	GSCOC_T00038801001	Kinesin KIF15	-1.98935
Cc05_g08750	GSCOC_T00016907001	Secologanin synthase	-1.98889
Cc06_g13600	GSCOC_T00041373001	Pathogenesis-related PR-1	-1.98829
Cc03_g09660	GSCOC_T00030952001	Ras-related RABA5c	-1.98659
Cc07_g03980	GSCOC_T00039648001	Uncharacterized protein	-1.98455
Cc06_g09010	GSCOC_T00041975001	Potassium channel AKT1	-1.98383
Cc05_g04040	GSCOC_T00031582001	Premnaspirodiene oxygenase	-1.98274
Cc06_g19440	GSCOC_T00029006001	UPF0481 At3g02645	-1.98274
Cc01_g20020	GSCOC_T00015983001	Histone H2AX	-1.98146
Cc00_g08060	GSCOC_T00006937001	Uncharacterized protein	-1.97967
Cc11_g12940	GSCOC_T00032248001	Intracellular ribonuclease LX	-1.97928
Cc08_g03880	GSCOC_T00034185001	CASP 4D1	-1.97726
Cc05_g02920	GSCOC_T00033458001	1-aminocyclopropane-1-carboxylate oxidase 4	-1.97725
Cc02_g01090	GSCOC_T00019917001	Metal-nicotianamine transporter YSL3	-1.9716
Cc07_g15290	GSCOC_T00036497001	Uncharacterized protein	-1.97042
Cc02_g09150	GSCOC_T00029696001	GDSL esterase lipase At5g33370	-1.97007
Cc03_g05340	GSCOC_T00026283001	Deacetoxyvindoline 4-hydroxylase	-1.96894
Cc02_g32400	GSCOC_T00012984001	Uncharacterized protein	-1.96834
Cc08_g15820	GSCOC_T00035525001	High mobility group B 6	-1.9681
Cc07_g01770	GSCOC_T00039353001	LATERAL ORGAN BOUNDARIES	-1.9672
Cc01_g10950	GSCOC_T00024211001	Cytokinin riboside 5 -monophosphate phosphoribohydrolase LOG1	-1.96618
Cc08_g15490	GSCOC_T00035481001	F-box FBD LRR-repeat At3g52680	-1.96464
Cc04_g12070	GSCOC_T00005249001	Uncharacterized protein	-1.96342
Cc07_g17970	GSCOC_T00018821001	Ankyrin repeat-containing ITN1	-1.96338
Cc08_g13880	GSCOC_T00030292001	HOTHEAD	-1.96207
Cc06_g00810	GSCOC_T00023281001	Breast cancer type 2 susceptibility homolog	-1.96183
Cc06_g02050	GSCOC_T00023445001	Rop guanine nucleotide exchange factor 1	-1.96129
Cc11_g06420	GSCOC_T00020654001	Uncharacterized protein	-1.96043
Cc04_g03650	GSCOC_T00022062001	Cyclin-A2-1	-1.96014
Cc07_g05140	GSCOC_T00039777001	Calcium uniporter mitochondrial	-1.96003
Cc05_g07830	GSCOC_T00016787001	Fasciclin-like arabinogalactan 6	-1.95937
Cc10_g09410	GSCOC_T00031548001	Immune-associated nucleotide-binding 10	-1.95897
Cc10_g11870	GSCOC_T00031865001	F-box kelch-repeat At3g06240	-1.95718
Cc00_g11120	GSCOC_T00009125001	DNA replication licensing factor MCM3 homolog 1	-1.95621
Cc01_g04740	GSCOC_T00015825001	Serine threonine- kinase OXI1	-1.95574
Cc04_g05440	GSCOC_T00022295001	Very-long-chain aldehyde decarbonylase CER3	-1.95322
Cc02_g21150	GSCOC_T00014751001	Vinorine synthase	-1.95169
Cc02_g22460	GSCOC_T00014917001	F-box At1g10780	-1.95071
Cc02_g11290	GSCOC_T00029429001	GATA transcription factor 11	-1.95065
Cc00_g13770	GSCOC_T00013300001	Alpha-aminoadipic semialdehyde mitochondrial	-1.94776
Cc06_g19450	GSCOC_T00029007001	3-hydroxypropionyl-coenzyme A dehydratase	-1.94604
Cc07_g09850	GSCOC_T00037190001	Mannan endo-	-1.94575
Cc06_g12260	GSCOC_T00041559001	Uncharacterized protein	-1.9457
Cc06_g07260	GSCOC_T00031286001	Annexin A3	-1.94545
Cc07_g19240	GSCOC_T00018617001	DNA topoisomerase 3-alpha	-1.94482
Cc06_g03900	GSCOC_T00023688001	Aquaporin PIP2-2	-1.94421
Cc07_g00780	GSCOC_T00019157001	Fidgetin 1	-1.93988
Cc02_g12070	GSCOC_T00029335001	G-type lectin S-receptor-like serine threonine- kinase At1g61490	-1.93944
Cc03_g07850	GSCOC_T00033160001	Ankyrin-2	-1.93601
Cc01_g10970	GSCOC_T00024213001	Uncharacterized protein	-1.936
Cc00_g24680	GSCOC_T00012726001	Bidirectional sugar transporter SWEET10	-1.93536
Cc02_g31860	GSCOC_T00027480001	Serine threonine- kinase Nek2	-1.93352
Cc06_g11200	GSCOC_T00041687001	Transcription factor MYB1R1	-1.93346
Cc01_g01420	GSCOC_T00037910001	F-box FBD LRR-repeat At1g16930	-1.93323
Cc04_g17190	GSCOC_T00035856001	Aldose 1-epimerase	-1.93289
Cc07_g06430	GSCOC_T00039948001	Microtubule-associated RP EB family member 3	-1.93115
Cc02_g28330	GSCOC_T00025208001	Uncharacterized protein	-1.93088
Cc08_g13940	GSCOC_T00030284001	UDP-galactose UDP-glucose transporter 4	-1.92977
Cc08_g15730	GSCOC_T00035514001	Light-sensor kinase	-1.92943
Cc04_g13400	GSCOC_T00018293001	Uncharacterized protein	-1.92843
Cc06_g09370	GSCOC_T00041924001	Sigma factor regulation	-1.9284
Cc06_g06140	GSCOC_T00031420001	NAC domain-containing 90	-1.92768
Cc00_g19230	GSCOC_T00011837001	Blue copper	-1.92675
Cc00_g25070	GSCOC_T00002590001	Endoglucanase 12	-1.92604
Cc02_g14370	GSCOC_T00013845001	Uncharacterized protein	-1.92509
Cc03_g02930	GSCOC_T00025966001	Uncharacterized protein	-1.92508
Cc06_g04760	GSCOC_T00042998001	RING-H2 finger ATL52	-1.92084
Cc05_g08980	GSCOC_T00016940001	G-type lectin S-receptor-like serine threonine- kinase SD2-5	-1.91825
Cc08_g09930	GSCOC_T00026948001	Receptor kinase 5	-1.91701
Cc09_g09750	GSCOC_T00011978001	Uncharacterized protein	-1.91668
Cc02_g05600	GSCOC_T00039073001	WEB family At2g38370	-1.91546
Cc05_g11370	GSCOC_T00021326001	N-acetylneuraminate 9-O-acetyltransferase	-1.91508
Cc07_g08630	GSCOC_T00040245001	Peptide methionine sulfoxide reductase	-1.91464
Cc05_g00990	GSCOC_T00009664001	disease resistance RGA3	-1.91384
Cc06_g15830	GSCOC_T00030771001	Malate cytoplasmic	-1.91184
Cc07_g09980	GSCOC_T00037175001	Disease resistance RPP13 4	-1.91175
Cc05_g15410	GSCOC_T00038696001	Kinesin KIN-14G	-1.91174
Cc07_g08300	GSCOC_T00040200001	Uncharacterized transporter	-1.91062
Cc07_g12110	GSCOC_T00036919001	Phosphate carrier mitochondrial	-1.91009
Cc05_g11960	GSCOC_T00021250001	Dynamin-related 5A	-1.90876
Cc05_g12460	GSCOC_T00021189001	Beta-glucosidase 16	-1.90791
Cc02_g08330	GSCOC_T00029808001	Zinc finger ZAT11	-1.90682
Cc02_g34570	GSCOC_T00000714001	Kinesin KIN-14G	-1.90383
Cc05_g11700	GSCOC_T00021281001	D-amino-acid chloroplastic	-1.90221
Cc10_g13850	GSCOC_T00035229001	Probable inactive receptor kinase At1g65250	-1.90158
Cc07_g06890	GSCOC_T00040016001	scarecrow 16	-1.90158
Cc11_g16740	GSCOC_T00038220001	Probable mitochondrial chaperone bcs1	-1.90104
Cc02_g00610	GSCOC_T00019846001	Pathogenesis-related 5	-1.90099
Cc06_g04950	GSCOC_T00043022001	Probable glycosyltransferase At5g03795	-1.89977
Cc06_g12650	GSCOC_T00041510001	Uncharacterized protein	-1.89885
Cc07_g14790	GSCOC_T00036568001	Probable serine threonine- kinase CST	-1.89831
Cc04_g02940	GSCOC_T00021978001	NRT1 PTR FAMILY	-1.89585
Cc03_g09900	GSCOC_T00030980001	Probable aldo-keto reductase 2	-1.89475
Cc01_g17730	GSCOC_T00016289001	ABC transporter C family member 5	-1.89465
Cc05_g06340	GSCOC_T00042120001	Uncharacterized protein	-1.89433
Cc03_g01560	GSCOC_T00025771001	Bifunctional epoxide hydrolase 2	-1.89403
Cc02_g02440	GSCOC_T00020099001	Probable receptor kinase At5g24010	-1.89054
Cc11_g06330	GSCOC_T00020643001	Beta-glucosidase 18	-1.89015
Cc02_g33720	GSCOC_T00015419001	Serine threonine- kinase PBS1	-1.88956
Cc06_g09290	GSCOC_T00041932001	Uncharacterized protein	-1.88953
Cc10_g10340	GSCOC_T00031426001	BAG family molecular chaperone regulator 3	-1.88932
Cc08_g08030	GSCOC_T00013078001	ABC transporter G family member 32	-1.88915
Cc06_g09100	GSCOC_T00041959001	Uncharacterized protein	-1.889
Cc06_g15420	GSCOC_T00030830001	Chitotriosidase-1	-1.88657
Cc11_g10980	GSCOC_T00032500001	Probable calcium-binding CML16	-1.88622
Cc06_g09970	GSCOC_T00041846001	Rac-like GTP-binding ARAC7	-1.88481
Cc00_g14100	GSCOC_T00000560001	Probable LRR receptor-like serine threonine- kinase At3g47570	-1.8837
Cc02_g26400	GSCOC_T00028612001	F-box kelch-repeat SKIP25	-1.88313
Cc06_g20380	GSCOC_T00022967001	Flavonol synthase flavanone 3-hydroxylase	-1.88233
Cc00_g12090	GSCOC_T00005877001	Fatty acid amide hydrolase	-1.87978
Cc08_g04180	GSCOC_T00034230001	TOPLESS	-1.87605
Cc01_g14760	GSCOC_T00028486001	UDP-glycosyltransferase 87A1	-1.87517
Cc00_g33800	GSCOC_T00007693001	Apyrase	-1.87429
Cc06_g14390	GSCOC_T00041262001	Bifunctional dihydroflavonol 4-reductase flavanone 4-reductase	-1.87365
Cc01_g01020	GSCOC_T00037998001	DNA (cytosine-5)-methyltransferase 1	-1.8697
Cc03_g09860	GSCOC_T00030976001	late blight resistance homolog R1A-6	-1.86937
Cc07_g07020	GSCOC_T00040035001	Condensin-2 complex subunit G2	-1.86879
Cc02_g12940	GSCOC_T00029218001	Bifunctional epoxide hydrolase 2	-1.8676
Cc10_g04700	GSCOC_T00034904001	WUSCHEL-related homeobox 4	-1.86626
Cc11_g06770	GSCOC_T00020703001	Receptor 12	-1.86522
Cc08_g02290	GSCOC_T00037694001	Leucine-rich repeat receptor kinase PEPR2	-1.86515
Cc06_g15380	GSCOC_T00030836001	Alpha beta hydrolase domain-containing 17C	-1.86331
Cc00_g14170	GSCOC_T00009211001	PI-PLC X domain-containing At5g67130	-1.86277
Cc02_g05340	GSCOC_T00039040001	Probably inactive leucine-rich repeat receptor kinase At3g28040	-1.8595
Cc09_g07520	GSCOC_T00036245001	Uncharacterized protein	-1.85915
Cc03_g01170	GSCOC_T00025722001	Uncharacterized protein	-1.85856
Cc00_g06220	GSCOC_T00010066001	Uncharacterized protein	-1.85713
Cc01_g05210	GSCOC_T00011463001	Uncharacterized protein	-1.85517
Cc06_g20480	GSCOC_T00022982001	Uncharacterized acetyltransferase At3g50280	-1.85485
Cc03_g15230	GSCOC_T00026792001	Probable leucine-rich repeat receptor kinase At5g49770	-1.85395
Cc07_g11210	GSCOC_T00037027001	Peroxidase 64	-1.85395
Cc02_g27430	GSCOC_T00025073001	Multiple C2 and transmembrane domain-containing 1	-1.85323
Cc10_g07750	GSCOC_T00034483001	Squalene monooxygenase	-1.85297
Cc01_g07330	GSCOC_T00030167001	G2 mitotic-specific cyclin-1	-1.85286
Cc01_g05870	GSCOC_T00027414001	Xyloglucan glycosyltransferase 4	-1.85279
Cc11_g10010	GSCOC_T00032640001	Uncharacterized protein	-1.85149
Cc07_g12370	GSCOC_T00036882001	UPF0548 At2g17695	-1.85083
Cc05_g13920	GSCOC_T00020999001	Transcription factor GAMYB	-1.85017
Cc01_g01280	GSCOC_T00037942001	Zinc finger A20 and AN1 domain-containing stress-associated 7	-1.84926
Cc02_g35270	GSCOC_T00042873001	Uncharacterized protein	-1.84906
Cc02_g20970	GSCOC_T00014722001	Carbonic chloroplastic	-1.84894
Cc09_g08610	GSCOC_T00020833001	BREAST CANCER SUSCEPTIBILITY 1 homolog	-1.84734
Cc02_g16150	GSCOC_T00014092001	GDSL esterase lipase At1g29670	-1.8448
Cc11_g10580	GSCOC_T00032559001	Probable galacturonosyltransferase-like 3	-1.84444
Cc05_g10050	GSCOC_T00021507001	kinase G11A	-1.84406
Cc01_g16260	GSCOC_T00016463001	Uncharacterized protein	-1.844
Cc11_g04680	GSCOC_T00004833001	Cytosolic sulfotransferase 17	-1.8439
Cc05_g02850	GSCOC_T00020872001	Glucan endo-	-1.84358
Cc05_g12450	GSCOC_T00021190001	Beta-glucosidase 18	-1.84293
Cc06_g05080	GSCOC_T00043041001	Uncharacterized protein	-1.84214
Cc06_g22950	GSCOC_T00040648001	Patatin group A-3	-1.84023
Cc06_g16680	GSCOC_T00030651001	polyol transporter 2	-1.83884
Cc05_g04460	GSCOC_T00031672001	late blight resistance homolog R1B-14	-1.83764
Cc07_g20910	GSCOC_T00027258001	Calcium and calcium calmodulin-dependent serine threonine- kinase DMI-3	-1.83706
Cc07_g09930	GSCOC_T00037181001	Probable mitochondrial chaperone bcs1	-1.83612
Cc05_g08040	GSCOC_T00016812001	PLASMODESMATA CALLOSE-BINDING PROTEIN 5	-1.83594
Cc06_g10880	GSCOC_T00041722001	Uncharacterized protein	-1.83505
Cc04_g15480	GSCOC_T00042320001	Uncharacterized protein	-1.83422
Cc10_g10630	GSCOC_T00036015001	Pathogenesis-related 5	-1.83274
Cc06_g03330	GSCOC_T00023614001	Uncharacterized protein	-1.83239
Cc04_g00110	GSCOC_T00021610001	STRUBBELIG-RECEPTOR FAMILY 5	-1.83203
Cc06_g22980	GSCOC_T00040642001	Uncharacterized protein	-1.83134
Cc02_g15110	GSCOC_T00013945001	Uncharacterized protein	-1.82888
Cc04_g03610	GSCOC_T00022056001	Auxin-induced 22A	-1.82863
Cc09_g05960	GSCOC_T00033381001	Ankyrin repeat-containing ITN1	-1.82727
Cc08_g07720	GSCOC_T00011859001	Uncharacterized protein	-1.8265
Cc00_g12240	GSCOC_T00008602001	ADP-ribosylation factor GTPase-activating AGD3	-1.82493
Cc04_g08060	GSCOC_T00022654001	Tropinone reductase homolog At1g07440	-1.82365
Cc08_g03230	GSCOC_T00037840001	Uncharacterized protein	-1.82312
Cc02_g37200	GSCOC_T00028026001	Uncharacterized protein	-1.82233
Cc04_g00680	GSCOC_T00021691001	Pectinesterase pectinesterase inhibitor U1	-1.82166
Cc02_g12020	GSCOC_T00029340001	Receptor-like serine threonine- kinase SD1-8	-1.821
Cc02_g00920	GSCOC_T00019893001	Uncharacterized protein	-1.81986
Cc06_g08850	GSCOC_T00031080001	kinase PINOID 2	-1.81881
Cc04_g04450	GSCOC_T00022170001	Uncharacterized protein	-1.81878
Cc11_g16790	GSCOC_T00038226001	Probable mannitol dehydrogenase	-1.81834
Cc04_g00360	GSCOC_T00021641001	Exocyst complex component 7	-1.81585
Cc02_g12360	GSCOC_T00029292001	Sugar carrier C	-1.81528
Cc07_g11540	GSCOC_T00036990001	Uncharacterized protein	-1.815
Cc07_g03380	GSCOC_T00039567001	Structural maintenance of chromosomes 4	-1.81232
Cc07_g14080	GSCOC_T00036658001	Uncharacterized protein	-1.8117
Cc07_g01010	GSCOC_T00019186001	SCARECROW	-1.80995
Cc03_g06660	GSCOC_T00026478001	UPF0481 At3g47200	-1.80513
Cc05_g01840	GSCOC_T00015771001	GEM 5	-1.8027
Cc04_g16480	GSCOC_T00035750001	Probable calcium-binding CML46	-1.80046
Cc02_g35360	GSCOC_T00042860001	Uncharacterized protein R707	-1.79891
Cc02_g09540	GSCOC_T00029644001	Cationic amino acid transporter chloroplastic	-1.79839
Cc05_g10310	GSCOC_T00021467001	Polyphenol oxidase chloroplastic	-1.79787
Cc08_g15050	GSCOC_T00035429001	BTB POZ domain-containing At1g63850	-1.79561
Cc02_g07570	GSCOC_T00029920001	Aspartic ase nepenthesin-1	-1.79526
Cc04_g03110	GSCOC_T00022000001	Uncharacterized protein	-1.79397
Cc06_g11890	GSCOC_T00041603001	Uncharacterized protein	-1.79353
Cc08_g03840	GSCOC_T00034180001	Uncharacterized protein	-1.79336
Cc04_g10740	GSCOC_T00042644001	Probable pectate lyase 22	-1.79315
Cc02_g26270	GSCOC_T00028630001	Probable xyloglucan endotransglucosylase hydrolase 30	-1.79262
Cc09_g02130	GSCOC_T00017715001	Monoglyceride lipase	-1.79254
Cc03_g03690	GSCOC_T00026066001	Uncharacterized protein	-1.79163
Cc04_g09270	GSCOC_T00022810001	Purple acid phosphatase 17	-1.79145
Cc10_g02450	GSCOC_T00024747001	Transmembrane 136	-1.78979
Cc08_g14730	GSCOC_T00035379001	Uncharacterized protein	-1.78957
Cc11_g08160	GSCOC_T00032913001	Endoglucanase 8	-1.78896
Cc02_g14990	GSCOC_T00013928001	Non-specific lipid-transfer	-1.78834
Cc11_g10660	GSCOC_T00032548001	Aspartic ase nepenthesin-1	-1.78734
Cc03_g07810	GSCOC_T00026645001	Uncharacterized protein	-1.78692
Cc11_g17150	GSCOC_T00038273001	Probable DNA primase large subunit	-1.7865
Cc04_g11460	GSCOC_T00037334001	Pentatricopeptide repeat-containing mitochondrial	-1.78498
Cc02_g26840	GSCOC_T00024989001	Uncharacterized protein	-1.78446
Cc04_g08930	GSCOC_T00022769001	NAC domain-containing 74	-1.78294
Cc07_g11240	GSCOC_T00037024001	Aspartic ase 1	-1.78254
Cc04_g16100	GSCOC_T00042401001	Uncharacterized protein	-1.78235
Cc02_g29030	GSCOC_T00011530001	Bifunctional dihydroflavonol 4-reductase flavanone 4-reductase	-1.78179
Cc07_g07850	GSCOC_T00040147001	Uncharacterized protein	-1.77992
Cc07_g06720	GSCOC_T00039993001	Sigma factor regulation	-1.77802
Cc03_g01950	GSCOC_T00025828001	Uncharacterized protein	-1.77565
Cc07_g02850	GSCOC_T00039494001	rRNA methyltransferase	-1.77418
Cc07_g06730	GSCOC_T00039994001	Probable phosphatase 2C 63	-1.77408
Cc06_g02700	GSCOC_T00023529001	Actin	-1.77294
Cc10_g07720	GSCOC_T00034486001	xyloglucan glycosyltransferase 10	-1.7717
Cc02_g24550	GSCOC_T00028870001	Squamosa promoter-binding 7	-1.7713
Cc05_g07580	GSCOC_T00002390001	Uncharacterized membrane	-1.77117
Cc02_g19980	GSCOC_T00014578001	U-box domain-containing 19	-1.77073
Cc01_g21490	GSCOC_T00004974001	Uncharacterized protein	-1.76997
Cc09_g07040	GSCOC_T00036325001	Uncharacterized protein	-1.76962
Cc02_g16660	GSCOC_T00014159001	Aquaporin TIP3-2	-1.76958
Cc06_g18920	GSCOC_T00028931001	Two-component response regulator ARR9	-1.76928
Cc04_g10180	GSCOC_T00042558001	Uncharacterized protein	-1.76691
Cc02_g36580	GSCOC_T00003906001	Probable calcium-binding CML10	-1.76548
Cc01_g07500	GSCOC_T00009390001	GAST1	-1.76522
Cc09_g00620	GSCOC_T00017924001	Glucan endo-	-1.76434
Cc02_g16790	GSCOC_T00014174001	Auxin-induced 15A	-1.76371
Cc07_g15550	GSCOC_T00036461001	DNA polymerase III -type	-1.75998
Cc06_g06330	GSCOC_T00031396001	Uncharacterized protein	-1.75993
Cc06_g17940	GSCOC_T00040388001	UDP-URONIC ACID TRANSPORTER 1	-1.75991
Cc00_g15060	GSCOC_T00008516001	Sec14 cytosolic factor	-1.7596
Cc01_g14110	GSCOC_T00028400001	Probable LRR receptor-like serine threonine- kinase At3g47570	-1.75733
Cc03_g01410	GSCOC_T00025753001	Probable phosphatase 2C 34	-1.75648
Cc10_g04790	GSCOC_T00034892001	Probable inactive receptor kinase At5g67200	-1.75529
Cc01_g06900	GSCOC_T00030098001	NRT1 PTR FAMILY	-1.75169
Cc07_g10550	GSCOC_T00037101001	BASIC PENTACYSTEINE6	-1.75137
Cc00_g06130	GSCOC_T00003127001	Subtilisin-like protease	-1.75099
Cc04_g08870	GSCOC_T00022762001	Sucrose synthase 2	-1.75053
Cc06_g09420	GSCOC_T00041916001	Uncharacterized protein	-1.75022
Cc11_g16080	GSCOC_T00038139001	Uncharacterized protein	-1.74919
Cc01_g01990	GSCOC_T00019283001	Heat shock cognate 70 kDa	-1.74904
Cc01_g05700	GSCOC_T00027384001	F-box At4g18380	-1.74853
Cc10_g01730	GSCOC_T00024659001	WEB family At1g75720	-1.74803
Cc05_g01210	GSCOC_T00000928001	Uncharacterized protein	-1.74576
Cc01_g09230	GSCOC_T00023970001	Serine carboxypeptidase-like 18	-1.74448
Cc02_g21140	GSCOC_T00014750001	Uncharacterized protein	-1.7436
Cc03_g05410	GSCOC_T00026292001	Ethylene-responsive transcription factor 1B	-1.74277
Cc11_g10150	GSCOC_T00032615001	Zinc finger CONSTANS-LIKE 16	-1.74242
Cc10_g03650	GSCOC_T00024897001	Cytochrome P450 82A3	-1.74179
Cc07_g20010	GSCOC_T00033915001	Probable glutathione S-transferase parC	-1.7416
Cc03_g12350	GSCOC_T00015230001	Uncharacterized CRM domain-containing chloroplastic	-1.741
Cc02_g29930	GSCOC_T00038923001	disease resistance RPP13 1	-1.74054
Cc02_g28890	GSCOC_T00018187001	Serine carboxypeptidase-like 40	-1.7376
Cc06_g22200	GSCOC_T00017165001	Phospholipase A2-alpha	-1.73738
Cc11_g06660	GSCOC_T00020690001	Vacuolar iron transporter	-1.73735
Cc03_g13840	GSCOC_T00031742001	Probable small nuclear ribonucleo Sm D2	-1.73614
Cc04_g17200	GSCOC_T00035857001	ABC transporter A family member 7	-1.73549
Cc01_g18390	GSCOC_T00016211001	Ethylene-responsive transcription factor 1B	-1.73522
Cc02_g09710	GSCOC_T00029619001	Uncharacterized protein	-1.73464
Cc08_g09260	GSCOC_T00017272001	NRT1 PTR FAMILY	-1.73391
Cc00_g11210	GSCOC_T00010562001	MDIS1-interacting receptor like kinase 2	-1.73249
Cc06_g17550	GSCOC_T00040335001	Probable leucine-rich repeat receptor kinase At1g35710	-1.73184
Cc02_g34060	GSCOC_T00000637001	Transcription factor bHLH19	-1.73053
Cc03_g07790	GSCOC_T00026643001	Probable calcium-binding CML22	-1.72797
Cc07_g10290	GSCOC_T00037136001	Aldehyde dehydrogenase family 3 member F1	-1.72731
Cc04_g12790	GSCOC_T00008271001	Uncharacterized protein	-1.72582
Cc02_g08580	GSCOC_T00029775001	Receptor kinase HERK 1	-1.72482
Cc02_g09880	GSCOC_T00029597001	Heavy metal-associated isoprenylated plant 26	-1.7239
Cc01_g19510	GSCOC_T00016049001	FANTASTIC FOUR 3	-1.72355
Cc05_g07620	GSCOC_T00016757001	Reticulon B17	-1.72223
Cc10_g05770	GSCOC_T00034768001	F-box kelch-repeat At5g43190	-1.72181
Cc06_g08410	GSCOC_T00031135001	Uncharacterized protein	-1.72149
Cc07_g09050	GSCOC_T00040299001	rough sheath 2 homolog	-1.71853
Cc10_g03670	GSCOC_T00024900001	B3 domain-containing REM16	-1.71784
Cc00_g21260	GSCOC_T00006902001	TPR and ankyrin repeat-containing 1	-1.7162
Cc07_g07110	GSCOC_T00040048001	Uncharacterized protein	-1.71582
Cc05_g15080	GSCOC_T00038736001	Cellulose synthase E6	-1.71566
Cc08_g00950	GSCOC_T00038447001	Uncharacterized protein	-1.71468
Cc10_g11760	GSCOC_T00031847001	Receptor 12	-1.71455
Cc06_g02880	GSCOC_T00023554001	Short-chain dehydrogenase TIC chloroplastic	-1.7121
Cc09_g10350	GSCOC_T00041056001	Uncharacterized protein	-1.71124
Cc08_g00350	GSCOC_T00038534001	TOPLESS	-1.70781
Cc00_g10780	GSCOC_T00000618001	Disease resistance RPP8	-1.70579
Cc01_g21090	GSCOC_T00005023001	Ethylene-responsive transcription factor RAP2-3	-1.70414
Cc11_g05920	GSCOC_T00020568001	Probable transmembrane ascorbate ferrireductase 3	-1.70399
Cc08_g00560	GSCOC_T00038501001	Auxin-responsive IAA29	-1.70371
Cc01_g06530	GSCOC_T00030041001	Cucumber peeling cupredoxin	-1.70334
Cc02_g12470	GSCOC_T00029277001	Uncharacterized protein	-1.70283
Cc08_g07860	GSCOC_T00011881001	WRKY transcription factor 18	-1.7017
Cc00_g16570	GSCOC_T00000764001	disease resistance RGA3	-1.70061
Cc01_g09640	GSCOC_T00024027001	Uncharacterized protein	-1.70031
Cc06_g13860	GSCOC_T00041337001	Uncharacterized protein	-1.70017
Cc03_g02280	GSCOC_T00025869001	CASP 1E2	-1.69942
Cc02_g15120	GSCOC_T00013946001	Myb family transcription factor At1g14600	-1.69893
Cc08_g06070	GSCOC_T00024433001	Uncharacterized protein	-1.696
Cc10_g04500	GSCOC_T00034926001	Uncharacterized protein At3g61260	-1.69558
Cc00_g26260	GSCOC_T00007872001	disease resistance RGA4	-1.69543
Cc04_g01240	GSCOC_T00021763001	receptor kinase At1g72540	-1.69523
Cc02_g03720	GSCOC_T00020265001	Alpha-L-fucosidase 1	-1.69326
Cc11_g12830	GSCOC_T00032263001	Expansin-A1	-1.69044
Cc03_g01980	GSCOC_T00025833001	Basic 7S globulin	-1.69015
Cc02_g01910	GSCOC_T00020028001	Arabinogalactan 20	-1.69012
Cc07_g08730	GSCOC_T00040261001	Uncharacterized protein	-1.69004
Cc08_g02080	GSCOC_T00037669001	Probable methyltransferase PMT14	-1.68989
Cc01_g16230	GSCOC_T00016467001	Uncharacterized protein	-1.68882
Cc02_g08610	GSCOC_T00029771001	ABC transporter G family member 1	-1.68838
Cc11_g11180	GSCOC_T00032477001	Uridine-cytidine kinase C	-1.68644
Cc11_g14750	GSCOC_T00032014001	Glucan endo-	-1.686
Cc06_g00080	GSCOC_T00023174001	Uncharacterized protein	-1.68515
Cc03_g08600	GSCOC_T00033288001	MDIS1-interacting receptor like kinase 2	-1.68495
Cc07_g13300	GSCOC_T00036761001	Condensin complex subunit 3	-1.68483
Cc11_g10230	GSCOC_T00032605001	Alpha-xylosidase 1	-1.68347
Cc08_g01410	GSCOC_T00038392001	Ankyrin repeat-containing At5g02620	-1.68149
Cc02_g27890	GSCOC_T00025144001	Uncharacterized protein	-1.67992
Cc00_g10990	GSCOC_T00000137001	Secologanin synthase	-1.67969
Cc02_g05180	GSCOC_T00039020001	Uncharacterized protein	-1.67968
Cc02_g01300	GSCOC_T00019948001	Uncharacterized protein	-1.67957
Cc02_g31560	GSCOC_T00027539001	Caskin-1	-1.6792
Cc03_g02360	GSCOC_T00025878001	Probable serine threonine- kinase At1g54610	-1.67912
Cc00_g07660	GSCOC_T00006758001	Replication A 70 kDa DNA-binding subunit	-1.67862
Cc08_g14420	GSCOC_T00030224001	Uncharacterized protein	-1.67792
Cc01_g07620	GSCOC_T00009374001	Non-specific lipid-transfer At5g64080	-1.67652
Cc11_g14090	GSCOC_T00032106001	Uncharacterized protein	-1.67619
Cc05_g04990	GSCOC_T00035045001	Peroxidase 3	-1.67481
Cc10_g02530	GSCOC_T00024757001	Bifunctional dihydrofolate reductase-thymidylate synthase	-1.67447
Cc11_g05380	GSCOC_T00020489001	Disease resistance RPM1	-1.67419
Cc00_g13810	GSCOC_T00007198001	Acyl- --sterol O-acyltransferase 1	-1.67377
Cc07_g07670	GSCOC_T00040122001	Probable hexokinase-like 2	-1.67294
Cc07_g09110	GSCOC_T00040307001	Anthocyanidin 3-O-glucosyltransferase 5	-1.67169
Cc02_g04130	GSCOC_T00020316001	21 kDa	-1.67157
Cc03_g08810	GSCOC_T00033320001	Auxilin-related 2	-1.67137
Cc08_g03030	GSCOC_T00037810001	ABC transporter B family member 2	-1.67054
Cc09_g02150	GSCOC_T00017712001	Monoglyceride lipase	-1.6701
Cc10_g07060	GSCOC_T00034574001	RNA-binding 24	-1.66931
Cc10_g04900	GSCOC_T00034879001	Probable isoaspartyl peptidase L-asparaginase 2	-1.66804
Cc08_g00920	GSCOC_T00038450001	Cellulose synthase A catalytic subunit	-1.66794
Cc04_g15090	GSCOC_T00004746001	Zinc finger ZAT4	-1.66623
Cc10_g04890	GSCOC_T00034880001	Cyclin-D3-1	-1.66543
Cc10_g00810	GSCOC_T00024540001	Cytokinin riboside 5 -monophosphate phosphoribohydrolase LOG5	-1.66475
Cc07_g19660	GSCOC_T00018531001	Isoflavone 2 -hydroxylase	-1.66351
Cc07_g05320	GSCOC_T00039802001	Uncharacterized protein	-1.66304
Cc03_g09190	GSCOC_T00042703001	Probable xyloglucan endotransglucosylase hydrolase 16	-1.66281
Cc05_g06660	GSCOC_T00042169001	Uncharacterized protein	-1.66254
Cc07_g10690	GSCOC_T00037085001	WEB family At2g17940	-1.66242
Cc06_g18150	GSCOC_T00040419001	Bifunctional monodehydroascorbate reductase and carbonic anhydrase nectarin-3	-1.66229
Cc06_g05360	GSCOC_T00043083001	Uncharacterized protein	-1.65908
Cc02_g32680	GSCOC_T00001208001	GDSL esterase lipase At1g54790	-1.65698
Cc02_g36000	GSCOC_T00042762001	Transcription factor MYB86	-1.65641
Cc07_g02390	GSCOC_T00039427001	Uncharacterized protein	-1.65537
Cc04_g02970	GSCOC_T00021981001	PLANT CADMIUM RESISTANCE 8	-1.65501
Cc06_g23450	GSCOC_T00040570001	DNA replication licensing factor mcm5-A	-1.65465
Cc02_g18100	GSCOC_T00014345001	Long chain acyl- synthetase 2	-1.6522
Cc10_g12610	GSCOC_T00031979001	Uncharacterized protein	-1.65094
Cc07_g21110	GSCOC_T00027218001	Small nuclear ribonucleo Sm D3	-1.65088
Cc06_g10710	GSCOC_T00041744001	Leucine-rich repeat extensin 4	-1.65075
Cc07_g03610	GSCOC_T00039604001	Phosphate transporter PHO1 homolog 9	-1.64733
Cc10_g08960	GSCOC_T00034317001	Uncharacterized protein	-1.64725
Cc10_g11650	GSCOC_T00001439001	late blight resistance homolog R1B-14	-1.64718
Cc02_g25580	GSCOC_T00028731001	E3 ubiquitin- ligase ATL4	-1.64709
Cc01_g03070	GSCOC_T00019040001	Serine threonine- kinase PBS1	-1.64649
Cc00_g14600	GSCOC_T00012538001	Outer envelope pore 16- chloroplastic mitochondrial	-1.64606
Cc06_g11370	GSCOC_T00041667001	Uncharacterized protein	-1.64545
Cc03_g08580	GSCOC_T00033282001	UPF0481 At3g47200	-1.64436
Cc11_g10680	GSCOC_T00032546001	CLAVATA3 ESR (CLE)-related 13	-1.64436
Cc10_g05870	GSCOC_T00034748001	Low affinity sulfate transporter 3	-1.64225
Cc09_g04130	GSCOC_T00017463001	Uncharacterized protein	-1.64064
Cc01_g14570	GSCOC_T00028463001	Probable phytol kinase chloroplastic	-1.63931
Cc02_g36810	GSCOC_T00003873001	MLO 13	-1.6385
Cc00_g04170	GSCOC_T00006610001	Thymidine kinase	-1.6381
Cc02_g04990	GSCOC_T00038996001	Uncharacterized protein	-1.6328
Cc08_g01140	GSCOC_T00038426001	Uncharacterized protein	-1.63179
[truncated: 3,913 more rows]
