# Supplementary material for: Transcriptomic Leaf Profiling Reveals Differential Responses of the Two Most Traded Coffee Species to Elevated [CO2]
Source: Int J Mol Sci. 2020 Dec 3;21(23):9211. doi: 10.3390/ijms21239211 (PMC7730880; doi:10.3390/ijms21239211)
Supplement: Supplementary file 1 [file ijms-21-09211-s001.zip › Table S6.xlsx]

## Sheet: up-regulated
Gene ID	ORF Name	Protein Name	Fold Change
Cc00_g10190	GSCOC_T00005691001	Acyl- -binding domain-containing 4	12.1707
Cc10_g14870	GSCOC_T00033641001	Uncharacterized protein	11.6061
Cc04_g16250	GSCOC_T00042423001	Uncharacterized protein	11.3025
Cc08_g09540	GSCOC_T00026895001	Carotenoid cleavage dioxygenase chloroplastic	11.21
Cc05_g00740	GSCOC_T00013163001	Uncharacterized protein	10.6777
Cc11_g08120	GSCOC_T00032919001	PLANT CADMIUM RESISTANCE 2	10.6252
Cc01_g04210	GSCOC_T00039295001	Homeobox-leucine zipper ATHB-8	10.579
Cc00_g26610	GSCOC_T00013347001	Serine protease HTRA1	9.97583
Cc00_g07170	GSCOC_T00011728001	UDP-glucose flavonoid 3-O-glucosyltransferase 3	9.92186
Cc00_g21940	GSCOC_T00009595001	UTP--glucose-1-phosphate uridylyltransferase	9.76582
Cc03_g11280	GSCOC_T00007327001	Cell division control 48 homolog B	9.73015
Cc11_g00660	GSCOC_T00004227001	Uncharacterized protein	9.66603
Cc00_g25490	GSCOC_T00000226001	8-hydroxyquercetin 8-O-methyltransferase	9.65087
Cc10_g15150	GSCOC_T00033683001	Peroxidase 12	9.63261
Cc05_g04940	GSCOC_T00035039001	Isocitrate lyase	9.61924
Cc05_g05400	GSCOC_T00035108001	Isoprene chloroplastic	9.43804
Cc04_g10210	GSCOC_T00042563001	Abscisic-aldehyde oxidase	9.25674
Cc06_g16100	GSCOC_T00030737001	Uncharacterized protein	9.25511
Cc00_g08000	GSCOC_T00009236001	Serine threonine- kinase PBS1	9.2244
Cc09_g08930	GSCOC_T00023138001	Uncharacterized protein	9.17771
Cc00_g11660	GSCOC_T00004163001	Pathogenesis-related P2	9.16835
Cc00_g12970	GSCOC_T00005419001	8-hydroxyquercetin 8-O-methyltransferase	9.11513
Cc03_g14340	GSCOC_T00031833001	Uncharacterized protein	9.10784
Cc04_g14960	GSCOC_T00010520001	Uncharacterized protein	9.04631
Cc00_g05500	GSCOC_T00006856001	ABC transporter B family member 9	9.00412
Cc03_g15270	GSCOC_T00026800001	Reticuline oxidase	8.97357
Cc03_g12770	GSCOC_T00015157001	Uncharacterized protein	8.86522
Cc00_g35880	GSCOC_T00010032001	disease resistance RGA1	8.85375
Cc03_g12740	GSCOC_T00015161001	Uncharacterized protein	8.83597
Cc03_g14000	GSCOC_T00031781001	Uncharacterized protein	8.75063
Cc00_g11100	GSCOC_T00009123001	Uncharacterized protein	8.74018
Cc08_g04970	GSCOC_T00042467001	Cytosolic sulfotransferase 5	8.70376
Cc09_g07380	GSCOC_T00036269001	Reticuline oxidase	8.62293
Cc04_g10600	GSCOC_T00042618001	Cytochrome P450 82A3	8.61942
Cc03_g04540	GSCOC_T00026176001	3-ketoacyl- synthase 2	8.57483
Cc09_g07390	GSCOC_T00036268001	Reticuline oxidase	8.57029
Cc07_g16850	GSCOC_T00037509001	Acetylglutamate kinase	8.54713
Cc10_g16450	GSCOC_T00013407001	Uncharacterized protein	8.53058
Cc07_g13930	GSCOC_T00036676001	UDP-rhamnose:rhamnosyltransferase 1	8.46135
Cc00_g09180	GSCOC_T00012170001	Uncharacterized protein	8.41997
Cc04_g14930	GSCOC_T00010515001	Uncharacterized protein	8.22204
Cc00_g15690	GSCOC_T00011280001	Mannosyl-oligosaccharide	8.18262
Cc08_g08830	GSCOC_T00017215001	BURP domain-containing 3	8.10766
Cc09_g07810	GSCOC_T00003762001	Uncharacterized protein	8.06924
Cc03_g12250	GSCOC_T00015253001	Desiccation-related PCC13-62	8.06872
Cc10_g06900	GSCOC_T00034597001	Uncharacterized protein	8.0647
Cc02_g08150	GSCOC_T00029839001	Uncharacterized protein	7.95168
Cc06_g17300	GSCOC_T00036366001	Uncharacterized protein	7.95154
Cc05_g00220	GSCOC_T00017048001	Uncharacterized protein	7.80916
Cc00_g31970	GSCOC_T00012440001	Ent-copalyl diphosphate chloroplastic	7.78949
Cc11_g02520	GSCOC_T00018511001	late blight resistance homolog R1B-17	7.77642
Cc02_g29830	GSCOC_T00038889001	Uncharacterized protein	7.7492
Cc04_g15230	GSCOC_T00042290001	ABC transporter A family member 9	7.69631
Cc07_g16980	GSCOC_T00037489001	Flavonoid 3	7.65619
Cc00_g20500	GSCOC_T00006309001	Uncharacterized protein	7.62198
Cc00_g05280	GSCOC_T00010369001	Uncharacterized protein	7.59374
Cc00_g32860	GSCOC_T00013701001	disease resistance RGA4	7.57267
Cc06_g16080	GSCOC_T00030740001	Uncharacterized protein	7.54823
Cc05_g05850	GSCOC_T00035172001	UDP-glucose flavonoid 3-O-glucosyltransferase 6	7.53135
Cc00_g23220	GSCOC_T00011145001	TMV resistance N	7.51254
Cc03_g04980	GSCOC_T00026230001	ase inhibitor	7.48624
Cc00_g26620	GSCOC_T00013349001	Uncharacterized protein	7.44657
Cc02_g37670	GSCOC_T00027958001	T-complex 1 subunit theta	7.44649
Cc10_g12120	GSCOC_T00031899001	Germin subfamily 1 member 7	7.43878
Cc00_g23130	GSCOC_T00012628001	Probable LRR receptor-like serine threonine- kinase At3g47570	7.41502
Cc08_g07880	GSCOC_T00011887001	Uncharacterized protein	7.37118
Cc08_g04890	GSCOC_T00042481001	Probable nucleoredoxin 1-2	7.36688
Cc00_g23060	GSCOC_T00008621001	Uncharacterized protein	7.32439
Cc01_g10050	GSCOC_T00024084001	Agmatine coumaroyltransferase-2	7.32402
Cc10_g15130	GSCOC_T00033681001	Peroxidase 12	7.31078
Cc10_g16310	GSCOC_T00033850001	Uncharacterized protein	7.27771
Cc02_g30410	GSCOC_T00023754001	DNA repair RAD5B	7.27206
Cc11_g04380	GSCOC_T00004777001	Uncharacterized protein	7.25777
Cc02_g24750	GSCOC_T00028846001	Carotenoid cleavage dioxygenase chloroplastic	7.25608
Cc03_g15180	GSCOC_T00026781001	Cytochrome P450 71A2	7.24722
Cc00_g30070	GSCOC_T00012164001	Acetylglutamate kinase	7.15826
Cc08_g05520	GSCOC_T00024325001	Cytosolic sulfotransferase 5	7.14347
Cc01_g17970	GSCOC_T00016259001	NRT1 PTR FAMILY	7.12921
Cc00_g15440	GSCOC_T00001450001	MDIS1-interacting receptor like kinase 2	7.12788
Cc05_g02270	GSCOC_T00018431001	Uncharacterized protein	7.07289
Cc03_g12260	GSCOC_T00015250001	Desiccation-related PCC13-62	7.05373
Cc11_g06640	GSCOC_T00020687001	L-gulonolactone oxidase	6.97179
Cc02_g07550	GSCOC_T00029922001	Glycerol-3-phosphate acyltransferase 5	6.96386
Cc00_g05510	GSCOC_T00006857001	ABC transporter B family member 9	6.95142
Cc08_g07460	GSCOC_T00025374001	Premnaspirodiene oxygenase	6.93496
Cc02_g24210	GSCOC_T00015137001	Pectinesterase 2	6.9147
Cc00_g21140	GSCOC_T00000021001	germin 3-2	6.90243
Cc00_g20770	GSCOC_T00008849001	Caffeic acid 3-O-methyltransferase	6.894
Cc03_g10380	GSCOC_T00031054001	Probable mitochondrial chaperone bcs1	6.88194
Cc02_g03420	GSCOC_T00020226001	Ethylene-responsive transcription factor ERF025	6.84668
Cc00_g22850	GSCOC_T00013107001	T-complex 1 subunit theta	6.81782
Cc11_g14430	GSCOC_T00032060001	Cyanidin-3-O-glucoside 2-O-glucuronosyltransferase	6.81605
Cc01_g19650	GSCOC_T00016031001	Basic 7S globulin 2	6.80939
Cc00_g12410	GSCOC_T00010382001	Uncharacterized protein	6.79808
Cc00_g29630	GSCOC_T00001110001	Uncharacterized protein	6.74187
Cc00_g04100	GSCOC_T00013737001	NADH dehydrogenas	6.71974
Cc07_g08030	GSCOC_T00040165001	Transcription factor MYB113	6.67591
Cc00_g03750	GSCOC_T00013262001	ABC transporter B family member 9	6.64676
Cc02_g28190	GSCOC_T00025186001	Transcription factor bHLH120	6.64638
Cc03_g11690	GSCOC_T00043188001	disease resistance RGA3	6.59813
Cc11_g04550	GSCOC_T00004809001	Dof zinc finger	6.57808
Cc09_g02140	GSCOC_T00017713001	Uncharacterized protein	6.56952
Cc08_g15140	GSCOC_T00035439001	F-box At5g55150	6.56556
Cc00_g22970	GSCOC_T00000544001	SENSITIVITY TO RED LIGHT REDUCED 1	6.53851
Cc01_g08230	GSCOC_T00015518001	Glucomannan 4-beta-mannosyltransferase 9	6.51374
Cc08_g00450	GSCOC_T00038520001	Bifunctional uridylyltransferase uridylyl-removing enzyme	6.49601
Cc06_g09000	GSCOC_T00041976001	Uncharacterized protein	6.4514
Cc08_g03690	GSCOC_T00034155001	Disease resistance RPM1	6.44285
Cc11_g01630	GSCOC_T00019539001	1-aminocyclopropane-1-carboxylate oxidase homolog 1	6.44086
Cc00_g13940	GSCOC_T00006567001	Uncharacterized protein	6.42587
Cc09_g07780	GSCOC_T00003759001	Probable LRR receptor-like serine threonine- kinase At3g47570	6.39985
Cc07_g05540	GSCOC_T00039830001	GDSL esterase lipase At2g23540	6.39928
Cc05_g09500	GSCOC_T00021575001	Glycerol-3-phosphate 2-O-acyltransferase 6	6.39558
Cc11_g04420	GSCOC_T00004786001	Uncharacterized protein	6.38526
Cc08_g07530	GSCOC_T00025385001	Ent-copalyl diphosphate chloroplastic	6.36008
Cc02_g37530	GSCOC_T00027977001	(+)-neomenthol dehydrogenase	6.33737
Cc09_g02230	GSCOC_T00017703001	Uncharacterized protein	6.33636
Cc00_g25320	GSCOC_T00006374001	Probable nucleoredoxin 1-1	6.33094
Cc04_g10250	GSCOC_T00042568001	Vinorine synthase	6.31748
Cc03_g11350	GSCOC_T00000035001	Purine permease 3	6.29272
Cc03_g11460	GSCOC_T00019349001	Uncharacterized protein	6.28473
Cc00_g35510	GSCOC_T00003701001	Lysine--tRNA ligase	6.27052
Cc10_g13890	GSCOC_T00035224001	Probable LRR receptor-like serine threonine- kinase At2g16250	6.2647
Cc00_g21180	GSCOC_T00005981001	Transmembrane emp24 domain-containing 2	6.26411
Cc00_g33600	GSCOC_T00001617001	Disease resistance RPM1	6.21302
Cc06_g09490	GSCOC_T00041906001	Probable sulfate transporter	6.21131
Cc08_g05770	GSCOC_T00024366001	Uncharacterized protein	6.20531
Cc02_g22570	GSCOC_T00014932001	Glutelin type-A 2	6.20463
Cc00_g32100	GSCOC_T00004429001	Acidic endochitinase	6.19603
Cc07_g13640	GSCOC_T00036712001	Rhamnogalacturonate lyase	6.1944
Cc00_g11300	GSCOC_T00007149001	Bark storage A	6.18851
Cc05_g00760	GSCOC_T00013166001	Acidic endochitinase	6.17724
Cc04_g10590	GSCOC_T00042615001	Cytochrome P450 82A1 (Fragment)	6.15634
Cc03_g08630	GSCOC_T00033291001	MDIS1-interacting receptor like kinase 2	6.15616
Cc03_g03420	GSCOC_T00026027001	Probable carboxylesterase 2	6.14725
Cc03_g13830	GSCOC_T00031739001	Minor histocompatibility antigen H13	6.13707
Cc03_g15290	GSCOC_T00026803001	Reticuline oxidase	6.12137
Cc01_g11500	GSCOC_T00003313001	Uncharacterized protein	6.10531
Cc07_g16830	GSCOC_T00037511001	Uncharacterized protein	6.1036
Cc10_g11410	GSCOC_T00013659001	T-complex 1 subunit beta	6.07999
Cc07_g14230	GSCOC_T00036641001	Uncharacterized protein	6.0602
Cc08_g10630	GSCOC_T00027035001	Uncharacterized protein	6.06003
Cc00_g22410	GSCOC_T00008114001	Disease resistance RPM1	6.04561
Cc00_g16440	GSCOC_T00005629001	Uncharacterized protein	6.04306
Cc00_g01640	GSCOC_T00002753001	Uncharacterized protein	6.03777
Cc00_g21720	GSCOC_T00005428001	disease resistance RGA4	6.03012
Cc01_g04370	GSCOC_T00004460001	Adenosine kinase 2	6.0243
Cc00_g19740	GSCOC_T00011283001	Histone-lysine N-methyltransferase CLF	6.01555
Cc07_g16840	GSCOC_T00037510001	Acetylglutamate kinase	6.00248
Cc00_g26900	GSCOC_T00007718001	MDIS1-interacting receptor like kinase 2	6.00103
Cc00_g17250	GSCOC_T00006075001	Premnaspirodiene oxygenase	5.99515
Cc09_g07410	GSCOC_T00036265001	Reticuline oxidase	5.99284
Cc11_g00840	GSCOC_T00019689001	Probable LRR receptor-like serine threonine- kinase At3g47570	5.98542
Cc00_g17280	GSCOC_T00006079001	Ent-copalyl diphosphate chloroplastic	5.98057
Cc00_g28300	GSCOC_T00005953001	disease resistance RGA4	5.97911
Cc04_g06550	GSCOC_T00022445001	Spore coat A	5.96871
Cc01_g09500	GSCOC_T00024004001	Cytochrome P450 94A1	5.96052
Cc04_g15350	GSCOC_T00042304001	ABC transporter A family member 11	5.93695
Cc07_g20620	GSCOC_T00007211001	Probable disease resistance At5g63020	5.92109
Cc01_g09450	GSCOC_T00023999001	Fatty acyl- reductase 3	5.91459
Cc10_g05830	GSCOC_T00034757001	Probable beta-D-xylosidase 5	5.89485
Cc09_g09700	GSCOC_T00004099001	BURP domain-containing 3	5.88983
Cc08_g11120	GSCOC_T00027105001	Ankyrin-2	5.88592
Cc03_g11660	GSCOC_T00043184001	Histone-lysine N-methyltransferase CLF	5.87715
Cc02_g13800	GSCOC_T00029095001	Cytochrome P450 86A1	5.8766
Cc00_g11110	GSCOC_T00009124001	Uncharacterized protein	5.87341
Cc03_g11820	GSCOC_T00043211001	disease resistance RGA4	5.8718
Cc02_g20300	GSCOC_T00014641001	Pathogenesis-related leaf 4	5.86394
Cc00_g22620	GSCOC_T00008168001	ABC transporter A family member 2	5.86276
Cc07_g18420	GSCOC_T00018755001	Pleiotropic drug resistance 2	5.8459
Cc08_g06440	GSCOC_T00036031001	UDP-glycosyltransferase 74F2	5.84254
Cc02_g23850	GSCOC_T00015089001	Probable methyltransferase PMT21	5.83942
Cc03_g10600	GSCOC_T00004052001	MDIS1-interacting receptor like kinase 2	5.83729
Cc08_g11980	GSCOC_T00030546001	Palmitoyl- thioesterase 1	5.82861
Cc00_g35890	GSCOC_T00005696001	Polyphenol oxidase chloroplastic	5.82016
Cc00_g12860	GSCOC_T00008937001	ABC transporter B family member 9	5.76957
Cc07_g20330	GSCOC_T00017006001	UDP-glycosyltransferase 85A2	5.74433
Cc00_g25680	GSCOC_T00001556001	8-hydroxyquercetin 8-O-methyltransferase	5.74179
Cc00_g21810	GSCOC_T00009098001	Pentatricopeptide repeat-containing chloroplastic	5.73434
Cc02_g19470	GSCOC_T00014515001	Indole-3-acetic acid-amido synthetase	5.71931
Cc06_g16090	GSCOC_T00030739001	Uncharacterized protein	5.7185
Cc08_g10740	GSCOC_T00027051001	Beta- insoluble isoenzyme CWINV1	5.71201
Cc09_g08800	GSCOC_T00020863001	Auxin-induced 5NG4	5.69513
Cc02_g31580	GSCOC_T00027533001	Polyubiquitin (Fragment)	5.68897
Cc03_g12080	GSCOC_T00015300001	E3 ubiquitin- ligase RING1a	5.65586
Cc01_g09870	GSCOC_T00024057001	Hyoscyamine 6-dioxygenase	5.65381
Cc04_g11660	GSCOC_T00037368001	Aldehyde dehydrogenase family 2 member C4	5.64522
Cc09_g01770	GSCOC_T00017766001	DETOXIFICATION 41	5.64124
Cc04_g09870	GSCOC_T00042518001	Palmitoyl-acyl carrier chloroplastic	5.61211
Cc03_g09010	GSCOC_T00042727001	CYC02	5.60303
Cc03_g12800	GSCOC_T00015151001	disease resistance RGA4	5.60303
Cc00_g03110	GSCOC_T00003067001	Annexin RJ4	5.57554
Cc10_g15140	GSCOC_T00033682001	Peroxidase 12	5.57522
Cc03_g12710	GSCOC_T00015167001	disease resistance RPP13 1	5.57014
Cc00_g21210	GSCOC_T00009603001	Myb-related 305	5.55875
Cc04_g15690	GSCOC_T00042345001	Ent-kaurenoic acid oxidase 1	5.53224
Cc03_g05820	GSCOC_T00026351001	Uncharacterized protein	5.53185
Cc00_g28850	GSCOC_T00005982001	Caffeic acid 3-O-methyltransferase 1	5.51607
Cc03_g12820	GSCOC_T00015146001	disease resistance RGA3	5.51584
Cc09_g03020	GSCOC_T00017599001	Ammonium transporter 1 member 2	5.50523
Cc00_g09650	GSCOC_T00007341001	Replication-associated	5.50331
Cc09_g00450	GSCOC_T00017949001	Genome poly	5.49428
Cc06_g06110	GSCOC_T00043182001	Beta- insoluble isoenzyme 1	5.49346
Cc02_g38250	GSCOC_T00027887001	DETOXIFICATION 41	5.4862
Cc11_g00670	GSCOC_T00004228001	Acyl- -binding domain-containing 4	5.46361
Cc00_g04930	GSCOC_T00005512001	Uncharacterized protein	5.46134
Cc10_g08840	GSCOC_T00034332001	Metallothionein 1	5.45932
Cc06_g22520	GSCOC_T00012880001	Uncharacterized protein	5.45152
Cc00_g31790	GSCOC_T00011706001	Probable leucine-rich repeat receptor kinase At1g35710	5.44426
Cc01_g00900	GSCOC_T00038014001	Uncharacterized protein	5.43895
Cc10_g13160	GSCOC_T00035332001	Transcription factor MYB44	5.39733
Cc01_g05660	GSCOC_T00027377001	disease resistance RGA1	5.39556
Cc09_g03820	GSCOC_T00017499001	12-oxophytodienoate reductase 1	5.36783
Cc05_g03160	GSCOC_T00033510001	Flavanone 7-O-glucoside 2 -O-beta-L-rhamnosyltransferase	5.34769
Cc11_g00740	GSCOC_T00019764001	DNA repair RAD5B	5.33362
Cc00_g35240	GSCOC_T00006553001	disease resistance RGA4	5.32936
Cc00_g26140	GSCOC_T00002207001	Ubiquitin-NEDD8 RUB2	5.30512
Cc09_g09690	GSCOC_T00004097001	Probable tocopherol O- chloroplastic	5.29678
Cc09_g06810	GSCOC_T00005139001	Fe(2+) transport 1	5.29587
Cc11_g01780	GSCOC_T00019517001	LTO1 homolog	5.29187
Cc07_g14220	GSCOC_T00036643001	Uncharacterized protein	5.29006
Cc01_g18690	GSCOC_T00016169001	Uncharacterized protein	5.28429
Cc01_g00090	GSCOC_T00012429001	Uncharacterized protein	5.27403
Cc02_g29560	GSCOC_T00018393001	Uncharacterized protein	5.26188
Cc09_g08240	GSCOC_T00020765001	Probable LRR receptor-like serine threonine- kinase At3g47570	5.25661
Cc03_g13730	GSCOC_T00031728001	Polygalacturonase-1 non-catalytic subunit beta	5.25487
Cc00_g26680	GSCOC_T00002626001	YIF1B	5.25156
Cc10_g10180	GSCOC_T00031444001	Uncharacterized protein	5.2478
Cc06_g03830	GSCOC_T00023679001	Fasciclin-like arabinogalactan 11	5.2429
Cc02_g25340	GSCOC_T00028758001	Ankyrin repeat-containing At5g02620	5.23823
Cc05_g15370	GSCOC_T00038700001	Uncharacterized protein	5.23823
Cc08_g14230	GSCOC_T00030252001	Thaumatin	5.22518
Cc07_g14460	GSCOC_T00036612001	Proline--tRNA ligase	5.20821
Cc01_g19250	GSCOC_T00016086001	Non-specific lipid-transfer At5g64080	5.20576
Cc00_g04980	GSCOC_T00005519001	Uncharacterized protein	5.20564
Cc08_g06200	GSCOC_T00040971001	Histidine kinase 5	5.20144
Cc04_g09590	GSCOC_T00022851001	Omega-hydroxypalmitate O-feruloyl transferase	5.19685
Cc08_g04790	GSCOC_T00042495001	Probable nucleoredoxin 1	5.1895
Cc09_g05590	GSCOC_T00033444001	Probable LRR receptor-like serine threonine- kinase At3g47570	5.18267
Cc11_g11590	GSCOC_T00032425001	Cytosolic sulfotransferase 12	5.1787
Cc00_g08550	GSCOC_T00005640001	MDIS1-interacting receptor like kinase 2	5.1682
Cc05_g07510	GSCOC_T00042281001	E3 ubiquitin- ligase RING1a	5.16731
Cc05_g02390	GSCOC_T00020988001	Iron-sulfur assembly -like mitochondrial	5.15794
Cc00_g23950	GSCOC_T00011724001	disease resistance RGA4	5.1466
Cc09_g07020	GSCOC_T00036327001	Uncharacterized protein	5.14248
Cc06_g14230	GSCOC_T00041284001	Uncharacterized protein	5.14026
Cc03_g12760	GSCOC_T00015158001	Disease resistance RGA2	5.13191
Cc08_g04110	GSCOC_T00034217001	disease resistance RGA1	5.1045
Cc05_g06000	GSCOC_T00035203001	Transcription factor MYB39	5.09969
Cc00_g27000	GSCOC_T00012522001	Disease resistance ADR1	5.09813
Cc02_g14910	GSCOC_T00013917001	Endoribonuclease Dicer homolog 2	5.09757
Cc02_g14560	GSCOC_T00013869001	GDSL esterase lipase At1g28590	5.08743
Cc10_g16300	GSCOC_T00033849001	Uncharacterized protein	5.08371
Cc08_g13990	GSCOC_T00030278001	Multidrug and toxin extrusion 1	5.06507
Cc02_g10460	GSCOC_T00029527001	Cytochrome P450 71A1	5.06249
Cc00_g35180	GSCOC_T00009929001	Mannosyl-oligosaccharide	5.05951
Cc01_g03490	GSCOC_T00033099001	MDIS1-interacting receptor like kinase 2	5.05273
Cc10_g11400	GSCOC_T00013658001	T-complex 1 subunit beta	5.05125
Cc05_g12330	GSCOC_T00021204001	CBS domain-containing CBSX5	5.04661
Cc01_g00410	GSCOC_T00005541001	Calreticulin-1	5.04362
Cc02_g38600	GSCOC_T00027842001	Probable WRKY transcription factor 56	5.04096
Cc00_g23140	GSCOC_T00012629001	LRR receptor-like serine threonine- kinase EFR	5.04075
Cc05_g06930	GSCOC_T00042210001	Probable polyol transporter 4	5.03473
Cc11_g11780	GSCOC_T00032400001	Cytochrome P450 85A	5.03271
Cc00_g15680	GSCOC_T00011279001	disease resistance RGA4	5.0275
Cc03_g10620	GSCOC_T00004056001	MDIS1-interacting receptor like kinase 2	5.02457
Cc05_g15210	GSCOC_T00038717001	Lipid transfer VAS	5.00877
Cc02_g19460	GSCOC_T00014514001	Probable indole-3-acetic acid-amido synthetase	5.00684
Cc03_g14750	GSCOC_T00026708001	late blight resistance homolog R1B-14	5.00552
Cc03_g12510	GSCOC_T00015209001	UDP-rhamnose:rhamnosyltransferase 1	4.98704
Cc11_g08110	GSCOC_T00032920001	PLANT CADMIUM RESISTANCE 2	4.97207
Cc02_g29550	GSCOC_T00018392001	3-hydroxypropionyl-coenzyme A dehydratase	4.96167
Cc04_g10040	GSCOC_T00042538001	Cytochrome P450 94A1	4.96167
Cc00_g03730	GSCOC_T00013259001	SRG1	4.96081
Cc01_g19230	GSCOC_T00016088001	Uncharacterized protein	4.95837
Cc02_g30420	GSCOC_T00023757001	Beta-glucosidase 11	4.95218
Cc07_g01140	GSCOC_T00019202001	CASP 1F3	4.94752
Cc03_g02650	GSCOC_T00025922001	Uncharacterized protein	4.94407
Cc08_g06450	GSCOC_T00036032001	UDP-glycosyltransferase 74E2	4.93796
Cc08_g07740	GSCOC_T00011862001	Uncharacterized protein	4.93183
Cc10_g04970	GSCOC_T00034868001	Zeta-crystallin	4.93176
Cc03_g14300	GSCOC_T00031828001	Uncharacterized protein	4.92891
Cc08_g09640	GSCOC_T00026910001	Uncharacterized protein	4.92685
Cc09_g01470	GSCOC_T00017805001	Probable F-box At4g22030	4.92288
Cc10_g04010	GSCOC_T00034989001	Uncharacterized protein	4.92286
Cc08_g09050	GSCOC_T00017244001	B3 domain-containing Os01g0234100	4.92015
Cc08_g02850	GSCOC_T00037780001	Uncharacterized protein	4.91897
Cc08_g08370	GSCOC_T00007228001	Caffeic acid 3-O-methyltransferase	4.91738
Cc02_g10030	GSCOC_T00029575001	Cyanidin-3-O-glucoside 2-O-glucuronosyltransferase	4.9158
Cc03_g14730	GSCOC_T00026706001	late blight resistance homolog R1A-6	4.91519
Cc00_g27450	GSCOC_T00000948001	MDIS1-interacting receptor like kinase 2	4.91075
Cc03_g12410	GSCOC_T00015223001	Chitinase 2	4.9085
Cc00_g17270	GSCOC_T00006078001	Uncharacterized protein	4.90559
Cc01_g09490	GSCOC_T00024003001	Probable fatty acyl- reductase 4	4.89899
Cc06_g18640	GSCOC_T00040488001	methyltransferase DDB_G0268948	4.892
Cc03_g06090	GSCOC_T00026387001	Probable disease resistance RPP8 4	4.88834
Cc03_g08680	GSCOC_T00033298001	MDIS1-interacting receptor like kinase 2	4.88623
Cc00_g19200	GSCOC_T00012531001	TMV resistance N	4.88158
Cc05_g16420	GSCOC_T00038563001	Uncharacterized protein	4.88138
Cc05_g00010	GSCOC_T00017008001	SCARECROW	4.87107
Cc00_g29650	GSCOC_T00004721001	Disease resistance RPM1	4.86205
Cc02_g10040	GSCOC_T00029574001	Cyanidin-3-O-glucoside 2-O-glucuronosyltransferase	4.85822
Cc11_g06190	GSCOC_T00020620001	late blight resistance homolog R1B-17	4.85811
Cc01_g09480	GSCOC_T00024002001	Probable fatty acyl- reductase 5	4.85267
Cc04_g04990	GSCOC_T00022239001	Probable aquaporin NIP5-1	4.83627
Cc06_g06090	GSCOC_T00043180001	Beta- insoluble isoenzyme 1	4.83444
Cc01_g00930	GSCOC_T00038009001	Disease resistance RGA2	4.83058
Cc06_g18690	GSCOC_T00040495001	BURP domain-containing 3	4.82607
Cc02_g22890	GSCOC_T00014967001	COBRA 1	4.82601
Cc00_g34490	GSCOC_T00004243001	disease resistance RPP13 1	4.82081
Cc00_g22140	GSCOC_T00005697001	Uncharacterized protein	4.81349
Cc08_g10290	GSCOC_T00026993001	Probable LRR receptor-like serine threonine- kinase At3g47570	4.81349
Cc02_g14600	GSCOC_T00013876001	Uncharacterized protein	4.80961
Cc06_g20100	GSCOC_T00022912001	UTP--glucose-1-phosphate uridylyltransferase	4.80475
Cc03_g16100	GSCOC_T00001678001	Polygalacturonase	4.80018
Cc02_g32950	GSCOC_T00016726001	Shikimate dehydrogenase (NADP(+))	4.79754
Cc07_g13750	GSCOC_T00036700001	Probable mannitol dehydrogenase	4.79117
Cc01_g08700	GSCOC_T00023904001	Momilactone A synthase	4.78868
Cc10_g14260	GSCOC_T00012016001	Pathogen-related	4.7872
Cc03_g12670	GSCOC_T00015179001	disease resistance RGA4	4.77638
Cc00_g12700	GSCOC_T00012642001	Uncharacterized protein	4.77078
Cc07_g14440	GSCOC_T00036614001	Uncharacterized protein	4.76541
Cc10_g12850	GSCOC_T00035377001	Stearoyl	4.76413
Cc00_g27220	GSCOC_T00001161001	Disease resistance RPM1	4.7625
Cc05_g06940	GSCOC_T00042212001	Bifunctional epoxide hydrolase 2	4.76241
Cc11_g04080	GSCOC_T00034037001	late blight resistance homolog R1A-6	4.75614
Cc10_g09360	GSCOC_T00031555001	12-oxophytodienoate reductase 2	4.74742
Cc00_g31340	GSCOC_T00007855001	Germin 1-2	4.74158
Cc03_g13870	GSCOC_T00031756001	disease resistance RGA4	4.71375
Cc00_g27610	GSCOC_T00003289001	Transcription factor bHLH27	4.7059
Cc06_g03730	GSCOC_T00023664001	Peroxidase 21	4.70158
Cc02_g14530	GSCOC_T00013864001	GDSL esterase lipase At1g28570	4.7003
Cc10_g06500	GSCOC_T00034647001	Purine permease 3	4.69989
Cc00_g05810	GSCOC_T00012073001	Caffeic acid 3-O-methyltransferase	4.69474
Cc07_g21220	GSCOC_T00027202001	Serine threonine- kinase BSK8	4.69445
Cc00_g26800	GSCOC_T00009925001	Disease resistance RPM1	4.69171
Cc06_g02470	GSCOC_T00023503001	Laccase-17	4.66013
Cc00_g26910	GSCOC_T00004004001	LEAF RUST 10 DISEASE-RESISTANCE LOCUS RECEPTOR-LIKE PROTEIN KINASE-like	4.65757
Cc00_g12780	GSCOC_T00009621001	Uncharacterized protein	4.65243
Cc06_g12210	GSCOC_T00041565001	Probable serine threonine- kinase PBL8	4.64428
Cc00_g22090	GSCOC_T00011254001	Probable disease resistance At1g61310	4.64117
Cc11_g00970	GSCOC_T00019670001	Mannosyl-oligosaccharide	4.63485
Cc07_g21440	GSCOC_T00016974001	Probable xyloglucan endotransglucosylase hydrolase 23	4.617
Cc00_g28380	GSCOC_T00007303001	Iron-sulfur assembly -like mitochondrial	4.61659
Cc03_g08160	GSCOC_T00033209001	UPF0481 At3g47200	4.6104
Cc00_g11500	GSCOC_T00012347001	Uncharacterized protein At5g65660	4.59108
Cc06_g10670	GSCOC_T00041749001	Profilin-2	4.564
Cc01_g01750	GSCOC_T00037853001	Disease resistance RGA2	4.55524
Cc04_g06810	GSCOC_T00022480001	Uncharacterized protein	4.5542
Cc08_g13960	GSCOC_T00030281001	Dehydration-responsive element-binding 1A	4.5536
Cc00_g11590	GSCOC_T00007371001	Transcription factor MYB21	4.55111
Cc00_g00310	GSCOC_T00036111001	Probable phosphatase 2C 43	4.54478
Cc03_g15530	GSCOC_T00026838001	homolog subfamily B member 6-A	4.54093
Cc08_g07970	GSCOC_T00007309001	Uncharacterized protein	4.52858
Cc09_g06850	GSCOC_T00005145001	LRR receptor-like serine threonine- kinase FLS2	4.51856
Cc05_g11300	GSCOC_T00021334001	ABC transporter G family member 10	4.50756
Cc04_g14520	GSCOC_T00040694001	L-type lectin-domain containing receptor kinase	4.5059
Cc00_g15330	GSCOC_T00009841001	Disease resistance ADR1	4.50105
Cc00_g16840	GSCOC_T00007766001	Disease resistance RGA2	4.47082
Cc01_g04380	GSCOC_T00004461001	Mannose glucose-specific lectin (Fragment)	4.47002
Cc11_g01480	GSCOC_T00019561001	Pleiotropic drug resistance 1	4.46558
Cc00_g14480	GSCOC_T00007441001	MDIS1-interacting receptor like kinase 2	4.45589
Cc00_g17070	GSCOC_T00002152001	Uncharacterized protein	4.45233
Cc07_g18580	GSCOC_T00018731001	Replication A 70 kDa DNA-binding subunit	4.45106
Cc11_g08140	GSCOC_T00032916001	PLANT CADMIUM RESISTANCE 2	4.43982
Cc06_g00160	GSCOC_T00023184001	Bromodomain and PHD finger-containing 3	4.43636
Cc08_g04160	GSCOC_T00034227001	disease resistance RGA3	4.43127
Cc03_g14330	GSCOC_T00031831001	Uncharacterized protein	4.41549
Cc06_g16160	GSCOC_T00030728001	Probable disease resistance RPP8 2	4.41227
Cc03_g12830	GSCOC_T00015145001	disease resistance RGA3	4.39655
Cc00_g18700	GSCOC_T00010033001	Disease resistance RGA2	4.38219
Cc00_g22550	GSCOC_T00011312001	Cyclin-dependent kinase C-1	4.3746
Cc00_g27510	GSCOC_T00007537001	BURP domain RD22	4.36734
Cc06_g18380	GSCOC_T00040451001	Uncharacterized protein	4.35457
Cc01_g03450	GSCOC_T00033106001	MDIS1-interacting receptor like kinase 2	4.35162
Cc00_g34270	GSCOC_T00000106001	disease resistance RGA4	4.34865
Cc08_g10540	GSCOC_T00027023001	Calcineurin B 9	4.34524
Cc08_g01650	GSCOC_T00038353001	Disease resistance RPM1	4.33304
Cc03_g12430	GSCOC_T00015220001	GDSL esterase lipase 5	4.3307
Cc09_g01910	GSCOC_T00017747001	Serine threonine- kinase PBS1	4.32481
Cc00_g34220	GSCOC_T00009908001	disease resistance RGA4	4.32059
Cc02_g10010	GSCOC_T00029577001	Cyanidin-3-O-glucoside 2-O-glucuronosyltransferase	4.31554
Cc00_g12230	GSCOC_T00011262001	Phospholipase C 2	4.30832
Cc03_g12790	GSCOC_T00015155001	disease resistance RGA4	4.29799
Cc00_g05520	GSCOC_T00006858001	Codeine O-demethylase	4.2961
Cc02_g16190	GSCOC_T00014097001	GDSL esterase lipase At1g29670	4.28721
Cc10_g13320	GSCOC_T00035313001	late blight resistance homolog R1B-17	4.28715
Cc00_g02940	GSCOC_T00004315001	Uncharacterized protein	4.28051
Cc03_g12440	GSCOC_T00015219001	GDSL esterase lipase 1	4.2786
Cc03_g12850	GSCOC_T00015142001	Uncharacterized protein	4.27473
Cc02_g25790	GSCOC_T00028697001	Very-long-chain aldehyde decarbonylase CER3	4.25383
Cc00_g33450	GSCOC_T00007482001	Uncharacterized protein	4.25178
Cc09_g07160	GSCOC_T00036307001	CASP 1B1	4.24365
Cc10_g09790	GSCOC_T00031499001	germin 2-1	4.23756
Cc09_g02070	GSCOC_T00017724001	Tyrosine-specific transport	4.21649
Cc09_g08990	GSCOC_T00023120001	Uncharacterized protein	4.21267
Cc03_g11730	GSCOC_T00043195001	disease resistance RGA3	4.1989
Cc10_g07810	GSCOC_T00034477001	Transcription factor RAX3	4.18952
Cc02_g26700	GSCOC_T00024972001	Non-specific lipid-transfer 4	4.18873
Cc02_g14580	GSCOC_T00013871001	GDSL esterase lipase At1g28580	4.16136
Cc00_g31350	GSCOC_T00006492001	disease resistance RGA4	4.15122
Cc08_g04240	GSCOC_T00034240001	Disease resistance RGA2	4.1482
Cc03_g09000	GSCOC_T00042731001	Glycine-rich	4.14146
Cc05_g05870	GSCOC_T00035174001	Transcription factor MYB4	4.135
Cc08_g03610	GSCOC_T00034146001	Disease resistance RPM1	4.12248
Cc00_g13190	GSCOC_T00012574001	Probable LRR receptor-like serine threonine- kinase At3g47570	4.11652
Cc02_g21310	GSCOC_T00014768001	UDP-glycosyltransferase 85A3	4.10298
Cc06_g20220	GSCOC_T00022935001	NRT1 PTR FAMILY	4.10241
Cc08_g11390	GSCOC_T00027140001	Expansin-like B1	4.09492
Cc01_g01800	GSCOC_T00037845001	disease resistance RGA4	4.09154
Cc08_g04220	GSCOC_T00034235001	disease resistance RGA1	4.09001
Cc00_g23650	GSCOC_T00000264001	Flavonoid 3 -monooxygenase	4.08217
Cc01_g17070	GSCOC_T00016366001	Uncharacterized protein	4.08175
Cc00_g24280	GSCOC_T00011104001	Uncharacterized protein	4.07078
Cc08_g16730	GSCOC_T00035644001	Uncharacterized protein	4.05058
Cc00_g09400	GSCOC_T00008942001	UTP--glucose-1-phosphate uridylyltransferase	4.03922
Cc05_g09860	GSCOC_T00021530001	Subtilisin-like protease	4.03546
Cc02_g12810	GSCOC_T00029234001	(	4.03285
Cc07_g14800	GSCOC_T00036567001	Phospho-2-dehydro-3-deoxyheptonate aldolase chloroplastic	4.02832
Cc02_g32370	GSCOC_T00012978001	Probable carboxylesterase 12	4.02484
Cc00_g18250	GSCOC_T00012286001	Ankyrin repeat-containing ITN1	4.0247
Cc00_g00640	GSCOC_T00036159001	LEAF RUST 10 DISEASE-RESISTANCE LOCUS RECEPTOR-LIKE PROTEIN KINASE-like	4.01617
Cc06_g18750	GSCOC_T00028901001	Probable tocopherol O- chloroplastic	4.01215
Cc04_g07480	GSCOC_T00022567001	receptor kinase 1	4.01014
Cc00_g00530	GSCOC_T00036141001	Probable receptor kinase At5g39030	4.00734
Cc08_g04700	GSCOC_T00042506001	Cyanidin-3-O-glucoside 2-O-glucuronosyltransferase	4.00467
Cc00_g06620	GSCOC_T00007483001	Dihydroflavonol 4-reductase	3.99942
Cc08_g04230	GSCOC_T00034238001	disease resistance RGA4	3.97817
Cc10_g06230	GSCOC_T00034687001	Laccase-14	3.97127
Cc06_g18700	GSCOC_T00040496001	Probable tocopherol O- chloroplastic	3.9658
Cc00_g32010	GSCOC_T00012890001	Thioredoxin H2	3.96391
Cc01_g03090	GSCOC_T00019035001	Uncharacterized protein	3.95282
Cc11_g15500	GSCOC_T00038064001	Heme-binding 2	3.94861
Cc08_g04830	GSCOC_T00042491001	Probable disease resistance At5g45510	3.94449
Cc00_g27480	GSCOC_T00006543001	Probable receptor kinase At5g39020	3.9437
Cc01_g19530	GSCOC_T00016046001	Uncharacterized protein	3.93252
Cc02_g20240	GSCOC_T00014630001	Agamous-like MADS-box AGL62	3.93059
Cc04_g07150	GSCOC_T00022521001	Uncharacterized protein	3.92868
Cc06_g23000	GSCOC_T00040640001	Thymidylate kinase	3.92775
Cc08_g10520	GSCOC_T00027020001	Signal recognition particle 54 kDa 2	3.91371
Cc00_g28930	GSCOC_T00008415001	UPF0481 At3g47200	3.91008
Cc01_g09660	GSCOC_T00024029001	Uncharacterized protein	3.9058
Cc03_g07130	GSCOC_T00026550001	ROOT HAIR DEFECTIVE 3	3.90413
Cc09_g00950	GSCOC_T00017878001	Uncharacterized protein	3.89542
Cc01_g11350	GSCOC_T00024263001	NAC domain-containing 68	3.89383
Cc00_g07200	GSCOC_T00006852001	Transcription factor bHLH35	3.88128
Cc04_g15680	GSCOC_T00042344001	Abscisic acid 8 -hydroxylase 1	3.8786
Cc01_g20640	GSCOC_T00015908001	Uncharacterized protein	3.87282
Cc05_g01640	GSCOC_T00010973001	Stromal cell-derived factor 2	3.86452
Cc10_g06850	GSCOC_T00034604001	Uncharacterized protein	3.86432
Cc01_g02370	GSCOC_T00009717001	Uncharacterized protein	3.86429
Cc10_g14300	GSCOC_T00012021001	Uncharacterized protein	3.85379
Cc01_g01770	GSCOC_T00037850001	disease resistance RPP13 1	3.85275
Cc02_g06190	GSCOC_T00039144001	U-box domain-containing 17	3.85183
Cc08_g01640	GSCOC_T00038355001	Disease resistance RPM1	3.84862
Cc00_g05840	GSCOC_T00012078001	Acidic endochitinase	3.84338
Cc08_g13570	GSCOC_T00030328001	Blue copper	3.84127
Cc00_g21540	GSCOC_T00013683001	Disease resistance RPM1	3.84083
Cc10_g09820	GSCOC_T00031496001	Germin subfamily 1 member 13	3.84018
Cc00_g31470	GSCOC_T00012294001	Disease resistance RPM1	3.83907
Cc00_g06140	GSCOC_T00010052001	Indole-3-acetaldehyde oxidase	3.83896
Cc09_g05900	GSCOC_T00033390001	wall-associated receptor kinase-like 11	3.83614
Cc01_g19640	GSCOC_T00016033001	Basic 7S globulin	3.83524
Cc06_g15930	GSCOC_T00030756001	Flavonol 3-sulfotransferase	3.82639
Cc00_g36000	GSCOC_T00005871001	Secologanin synthase	3.82636
Cc02_g34000	GSCOC_T00008655001	Transcription factor bHLH19	3.82341
Cc01_g05170	GSCOC_T00011473001	Omega-6 fatty acid endoplasmic reticulum isozyme 2	3.8207
Cc07_g16950	GSCOC_T00037494001	Citrate-binding	3.81907
Cc02_g11550	GSCOC_T00029398001	Tryptophan synthase beta chain chloroplastic	3.81444
Cc02_g21300	GSCOC_T00014767001	UDP-glycosyltransferase 85A2	3.81098
Cc03_g15460	GSCOC_T00026827001	homolog subfamily B member 6-A	3.80483
Cc02_g00510	GSCOC_T00019834001	Uncharacterized protein	3.80396
Cc11_g11650	GSCOC_T00032418001	Cytochrome P450 734A1	3.79554
Cc00_g25830	GSCOC_T00001794001	1-aminocyclopropane-1-carboxylate oxidase 4	3.79093
Cc03_g14740	GSCOC_T00026707001	Late blight resistance R1-A	3.78825
Cc07_g13670	GSCOC_T00036708001	Geraniol dehydrogenase 1	3.78429
Cc04_g08040	GSCOC_T00022652001	Tropinone reductase homolog At1g07440	3.78005
Cc10_g10280	GSCOC_T00031433001	Uncharacterized protein At4g06598	3.77948
Cc00_g27820	GSCOC_T00006800001	Vinorine synthase	3.771
Cc00_g05380	GSCOC_T00000535001	Uncharacterized protein	3.76416
Cc00_g17510	GSCOC_T00000103001	Uncharacterized protein	3.7613
Cc01_g03690	GSCOC_T00033064001	Uncharacterized protein	3.75932
Cc08_g14250	GSCOC_T00030247001	Thaumatin	3.75362
Cc00_g02930	GSCOC_T00004314001	F-box kelch-repeat At3g06240	3.75236
Cc00_g11330	GSCOC_T00007152001	Bark storage A	3.75219
Cc00_g08110	GSCOC_T00006947001	disease resistance RGA4	3.74775
Cc06_g19110	GSCOC_T00028962001	Transcription factor ORG2	3.74155
Cc06_g07220	GSCOC_T00031292001	Lysosomal beta glucosidase	3.73769
Cc07_g20740	GSCOC_T00027308001	late blight resistance homolog R1B-16	3.73534
Cc07_g13920	GSCOC_T00036677001	UDP-rhamnose:rhamnosyltransferase 1	3.73145
Cc04_g11900	GSCOC_T00037401001	LEAF RUST 10 DISEASE-RESISTANCE LOCUS RECEPTOR-LIKE PROTEIN KINASE-like	3.72947
Cc10_g09580	GSCOC_T00031525001	Cysteine ase inhibitor 5	3.71866
Cc00_g25790	GSCOC_T00000762001	Cell division control 48 homolog B	3.71717
Cc02_g12800	GSCOC_T00029235001	(	3.70758
Cc11_g11190	GSCOC_T00032476001	Peroxidase 11	3.70307
Cc08_g05270	GSCOC_T00007026001	disease resistance RGA1	3.70027
Cc04_g13820	GSCOC_T00035890001	Probable disease resistance RPP8 2	3.69888
Cc02_g10860	GSCOC_T00029482001	DNA replication licensing factor MCM7	3.69614
Cc08_g01690	GSCOC_T00038346001	-lysine methyltransferase METTL21D	3.68773
Cc06_g18440	GSCOC_T00040460001	Non-specific lipid-transfer	3.67982
Cc00_g09160	GSCOC_T00011964001	Disease resistance RGA2	3.67972
Cc05_g01410	GSCOC_T00018219001	Pentatricopeptide repeat-containing At4g21065	3.67631
Cc02_g04220	GSCOC_T00020329001	14 kDa proline-rich	3.66966
Cc10_g13340	GSCOC_T00035310001	Uncharacterized acetyltransferase At3g50280	3.66671
Cc02_g15880	GSCOC_T00014054001	Cysteine ase inhibitor 6	3.66107
Cc09_g09980	GSCOC_T00041104001	Bidirectional sugar transporter SWEET2a	3.66027
Cc00_g28140	GSCOC_T00000224001	Flavonoid 3	3.65938
Cc00_g26930	GSCOC_T00005551001	Disease resistance RGA2	3.65479
Cc03_g09920	GSCOC_T00030983001	Probable aldo-keto reductase 2	3.65451
Cc00_g25750	GSCOC_T00013351001	Disease resistance RGA2	3.65243
Cc08_g07660	GSCOC_T00025409001	Uncharacterized protein	3.65197
Cc11_g07520	GSCOC_T00018045001	Ankyrin repeat-containing At5g02620	3.63778
Cc07_g09580	GSCOC_T00037223001	Uncharacterized protein Mb2734	3.6328
Cc04_g14570	GSCOC_T00040708001	Secologanin synthase	3.62916
Cc05_g04760	GSCOC_T00035011001	Vacuolar amino acid transporter 1	3.6182
Cc00_g28280	GSCOC_T00000756001	SRG1	3.61367
Cc02_g03240	GSCOC_T00020200001	CEN 1	3.60307
Cc00_g00450	GSCOC_T00036131001	Arginine decarboxylase	3.60269
Cc00_g25150	GSCOC_T00013489001	disease resistance RGA4	3.602
Cc02_g05670	GSCOC_T00039081001	Uncharacterized protein	3.60068
Cc07_g14670	GSCOC_T00036582001	Laccase-17	3.59993
Cc02_g19940	GSCOC_T00014574001	Rac-like GTP-binding RAC13	3.59484
Cc10_g14590	GSCOC_T00033600001	Vacuolar iron transporter homolog 4	3.59335
Cc04_g07830	GSCOC_T00022621001	Uncharacterized protein	3.59253
Cc08_g15870	GSCOC_T00035531001	Hydroquinone glucosyltransferase	3.58273
Cc08_g07990	GSCOC_T00007319001	Probable 6-phosphogluconolactonase chloroplastic	3.58088
Cc08_g07140	GSCOC_T00025316001	UDP-glycosyltransferase 73C4	3.57696
Cc00_g29260	GSCOC_T00011966001	eIF-2-alpha kinase GCN2	3.5753
Cc00_g17360	GSCOC_T00007781001	Probable disease resistance At4g27220	3.5729
Cc08_g11080	GSCOC_T00027100001	Uncharacterized protein	3.5722
Cc05_g08990	GSCOC_T00002685001	Epidermis-specific secreted glyco EP1	3.56781
Cc08_g08900	GSCOC_T00017227001	UPF0481 At3g47200	3.56089
Cc04_g15740	GSCOC_T00042352001	NRT1 PTR FAMILY	3.55909
Cc10_g10450	GSCOC_T00035969001	Probable LRR receptor-like serine threonine- kinase At3g47570	3.55397
Cc01_g00370	GSCOC_T00013679001	Benzyl alcohol O-benzoyltransferase	3.54818
Cc02_g18490	GSCOC_T00014394001	Proline--tRNA ligase	3.54816
Cc00_g14460	GSCOC_T00010003001	1-aminocyclopropane-1-carboxylate oxidase homolog 11	3.54674
Cc00_g33460	GSCOC_T00002042001	GDSL esterase lipase At5g45910	3.54397
Cc00_g01970	GSCOC_T00000819001	TIFY 5A	3.54106
Cc08_g01530	GSCOC_T00038372001	Beta-amylase chloroplastic	3.53246
Cc08_g02570	GSCOC_T00037734001	Uncharacterized protein	3.53041
Cc09_g04740	GSCOC_T00017387001	Transcription factor MYB86	3.50107
Cc00_g00750	GSCOC_T00036189001	F-box At5g07610	3.49606
Cc05_g07450	GSCOC_T00042274001	Leucine-rich repeat extensin 4	3.4958
Cc01_g03430	GSCOC_T00033108001	MDIS1-interacting receptor like kinase 2	3.49514
Cc03_g12690	GSCOC_T00015174001	disease resistance RGA4	3.49395
Cc11_g11640	GSCOC_T00032419001	Cytochrome P450 734A1	3.4928
Cc00_g32520	GSCOC_T00006855001	disease resistance RGA4	3.49168
Cc00_g27770	GSCOC_T00012253001	Probable leucine-rich repeat receptor kinase At1g35710	3.48222
Cc00_g11710	GSCOC_T00007637001	late blight resistance homolog R1B-17	3.48064
Cc01_g03420	GSCOC_T00033110001	Probable leucine-rich repeat receptor kinase At1g35710	3.47388
Cc06_g07950	GSCOC_T00031193001	Transcription factor MYB4	3.46944
Cc00_g26350	GSCOC_T00005406001	SRG1	3.46905
Cc00_g09390	GSCOC_T00008941001	Serine threonine- kinase PBS1	3.45451
Cc00_g19750	GSCOC_T00011285001	disease resistance RGA4	3.4425
Cc08_g16390	GSCOC_T00035598001	Uncharacterized protein	3.44241
Cc09_g00470	GSCOC_T00017946001	Uncharacterized protein	3.42853
Cc07_g09690	GSCOC_T00037208001	Laccase-11	3.42644
Cc02_g03430	GSCOC_T00020227001	Dehydration-responsive element-binding 1B	3.41825
Cc08_g15540	GSCOC_T00035490001	Disease resistance response 206	3.41674
Cc02_g17930	GSCOC_T00014324001	DETOXIFICATION 41	3.40966
Cc11_g01620	GSCOC_T00019540001	6-hydroxynicotinate 3-monooxygenase	3.40952
Cc02_g29530	GSCOC_T00018389001	Miraculin	3.40878
Cc00_g31700	GSCOC_T00002038001	Uncharacterized protein	3.40854
Cc02_g12140	GSCOC_T00029328001	Calcium-binding PBP1	3.40459
Cc07_g14880	GSCOC_T00036558001	UDP-glycosyltransferase 85A3	3.40271
Cc04_g15650	GSCOC_T00042341001	Momilactone A synthase	3.40224
Cc03_g12780	GSCOC_T00015156001	Uncharacterized protein	3.39843
Cc09_g04900	GSCOC_T00007059001	Probable splicing factor 3A subunit 1	3.39816
Cc11_g17200	GSCOC_T00038279001	Uncharacterized protein	3.39179
Cc11_g07510	GSCOC_T00018046001	Leucine-rich repeat receptor-like serine threonine- kinase At1g17230	3.38957
Cc02_g18200	GSCOC_T00014357001	Transmembrane 45B	3.38777
Cc00_g26210	GSCOC_T00010475001	Uncharacterized protein	3.38334
Cc00_g29510	GSCOC_T00011855001	disease resistance RGA4	3.38148
Cc00_g16640	GSCOC_T00013787001	Phosphate transporter PHO1 homolog 10	3.37429
Cc00_g23940	GSCOC_T00011723001	disease resistance RGA3	3.37256
Cc10_g03630	GSCOC_T00024894001	Cytochrome P450 82A3	3.37233
Cc10_g08890	GSCOC_T00034326001	Uncharacterized protein	3.36958
Cc02_g05640	GSCOC_T00039077001	Peroxidase 4	3.36867
Cc07_g15300	GSCOC_T00036494001	Uncharacterized protein	3.36582
Cc00_g11130	GSCOC_T00009397001	disease resistance RGA3	3.36115
Cc08_g00220	GSCOC_T00005578001	Uncharacterized protein	3.35843
Cc05_g02320	GSCOC_T00001628001	UDP-glucose flavonoid 3-O-glucosyltransferase 6	3.35572
Cc02_g03820	GSCOC_T00020280001	Uncharacterized protein	3.34038
Cc11_g00760	GSCOC_T00019758001	Cysteine-rich receptor kinase 25	3.33978
Cc05_g10250	GSCOC_T00021480001	Polyphenol chloroplastic	3.33704
Cc00_g05420	GSCOC_T00000299001	late blight resistance homolog R1A-6	3.33617
Cc06_g18710	GSCOC_T00040498001	Probable tocopherol O- chloroplastic	3.33487
Cc10_g13070	GSCOC_T00035347001	Cyanidin-3-O-glucoside 2-O-glucuronosyltransferase	3.33351
Cc03_g12720	GSCOC_T00015166001	disease resistance RGA4	3.32338
Cc08_g04690	GSCOC_T00042509001	HEADING DATE 3A	3.31105
Cc05_g00800	GSCOC_T00013171001	Hevamine-A	3.30587
Cc08_g07600	GSCOC_T00025394001	Transcription factor NAI1	3.30221
Cc02_g00470	GSCOC_T00019829001	60S ribosomal L13-2	3.3021
Cc02_g19950	GSCOC_T00014575001	Nucleobase-ascorbate transporter 7	3.30081
Cc02_g34950	GSCOC_T00011805001	Uncharacterized protein	3.29963
Cc00_g21060	GSCOC_T00001399001	Clathrin heavy chain 1	3.29892
Cc01_g10410	GSCOC_T00024137001	Probable xyloglucan endotransglucosylase hydrolase 32	3.29256
Cc00_g10960	GSCOC_T00006918001	Disease resistance RPM1	3.29068
Cc11_g01610	GSCOC_T00019541001	Polyamine oxidase 3	3.28777
Cc06_g09680	GSCOC_T00041883001	Uncharacterized protein	3.28746
Cc05_g03840	GSCOC_T00017328001	Potassium transporter 5	3.28718
Cc00_g20220	GSCOC_T00005237001	disease resistance RGA3	3.28476
Cc07_g18060	GSCOC_T00018808001	UDP-glucuronate:xylan alpha-glucuronosyltransferase 1	3.2632
Cc10_g12030	GSCOC_T00031886001	IAA-amino acid hydrolase ILR1-like 6	3.25997
Cc00_g26740	GSCOC_T00003170001	UDP-glycosyltransferase 88A1	3.25092
Cc10_g07480	GSCOC_T00034516001	Probable beta-D-xylosidase 6	3.24805
Cc06_g14090	GSCOC_T00041302001	Auxin-induced 5NG4	3.24752
Cc00_g22600	GSCOC_T00003322001	Codeine O-demethylase	3.23841
Cc08_g03750	GSCOC_T00034163001	Cytosolic sulfotransferase 14	3.22761
Cc00_g17520	GSCOC_T00000104001	disease resistance RGA3	3.22554
Cc05_g12850	GSCOC_T00021135001	Calcium-binding PBP1	3.22324
Cc10_g01800	GSCOC_T00024668001	Probable diphthine methyl ester synthase	3.22139
Cc07_g02690	GSCOC_T00039474001	NRT1 PTR FAMILY	3.21516
Cc00_g05180	GSCOC_T00000316001	Caffeic acid 3-O-methyltransferase 1	3.21434
Cc00_g02040	GSCOC_T00001836001	Probable disease resistance At4g27220	3.2127
Cc06_g04510	GSCOC_T00042962001	Aquaporin TIP1-1	3.21094
Cc01_g02610	GSCOC_T00009674001	Cytochrome P450 71D10	3.20806
Cc05_g08770	GSCOC_T00016909001	Secologanin synthase	3.20557
Cc04_g12010	GSCOC_T00037418001	Uncharacterized protein	3.20494
Cc01_g00720	GSCOC_T00011062001		3.19606
Cc00_g14970	GSCOC_T00004040001	Cactin	3.1878
Cc02_g25290	GSCOC_T00028767001	Uncharacterized protein	3.18571
Cc11_g09460	GSCOC_T00032721001	late blight resistance homolog R1A-6	3.182
Cc03_g15860	GSCOC_T00001642001	disease resistance RGA3	3.18005
Cc10_g11370	GSCOC_T00013654001	UPF0496 4	3.17989
Cc10_g08940	GSCOC_T00034320001	Probable feruloyl esterase A	3.17873
Cc00_g00970	GSCOC_T00041160001	Germin subfamily 1 member 7	3.17282
Cc07_g12590	GSCOC_T00036854001	syntaxin-24	3.17232
Cc01_g13190	GSCOC_T00028282001	Laccase-2	3.16876
Cc00_g04110	GSCOC_T00013741001	Cysteine protease XCP1	3.16869
Cc03_g01350	GSCOC_T00025745001	Chaperone	3.16799
Cc01_g01790	GSCOC_T00037847001	Disease resistance RGA2	3.16698
Cc09_g03770	GSCOC_T00017505001	Serine carboxypeptidase-like 20	3.16231
Cc01_g01490	GSCOC_T00037900001	UDP-glycosyltransferase 74E2	3.15997
Cc04_g16150	GSCOC_T00042407001	Uncharacterized protein	3.1569
Cc01_g17310	GSCOC_T00016339001	Probable pectate lyase 8	3.15674
Cc00_g18490	GSCOC_T00005333001	Codeine O-demethylase	3.15549
Cc11_g04630	GSCOC_T00004822001	Uncharacterized protein	3.15366
Cc03_g02960	GSCOC_T00025969001	Elongation factor Tu	3.14835
Cc02_g35700	GSCOC_T00042807001	Pleiotropic drug resistance 3	3.14251
Cc00_g09990	GSCOC_T00005173001	Probable disease resistance At1g59620	3.14087
Cc05_g00770	GSCOC_T00013168001	Acidic endochitinase	3.13748
Cc05_g08840	GSCOC_T00016916001	Secologanin synthase	3.13246
Cc00_g11980	GSCOC_T00010413001	MDIS1-interacting receptor like kinase 2	3.13157
Cc00_g34520	GSCOC_T00012632001	Benzyl alcohol O-benzoyltransferase	3.12804
Cc02_g22330	GSCOC_T00014902001	Basic blue	3.126
Cc00_g27020	GSCOC_T00006600001	Benzoate carboxyl methyltransferase	3.12224
Cc11_g10690	GSCOC_T00032545001	Uncharacterized protein	3.11794
Cc08_g04990	GSCOC_T00042462001	Uncharacterized protein	3.10871
Cc03_g12280	GSCOC_T00015241001	SHORT-ROOT	3.1067
Cc09_g09160	GSCOC_T00023090001	Purine permease 21	3.10606
Cc02_g25960	GSCOC_T00028673001	Uncharacterized protein	3.09791
Cc11_g10030	GSCOC_T00032636001	Adenylate isopentenyltransferase	3.09644
Cc06_g01620	GSCOC_T00023390001	Laccase-4	3.09584
Cc06_g20230	GSCOC_T00022936001	NRT1 PTR FAMILY	3.08887
Cc03_g12970	GSCOC_T00030628001	LRR receptor-like serine threonine- kinase ERL2	3.08829
Cc06_g10840	GSCOC_T00041728001	Inositol oxygenase 2	3.08794
Cc00_g08090	GSCOC_T00006943001	Deacetylvindoline O-acetyltransferase	3.0863
Cc00_g03440	GSCOC_T00000276001	DNA replication complex GINS SLD5	3.07847
Cc06_g01110	GSCOC_T00023322001	Late embryogenesis abundant	3.069
Cc07_g13910	GSCOC_T00036679001	UDP-rhamnose:rhamnosyltransferase 1	3.06879
Cc06_g00990	GSCOC_T00023305001	Myb family transcription factor At1g14600	3.06127
Cc03_g08650	GSCOC_T00033294001	MDIS1-interacting receptor like kinase 2	3.06076
Cc02_g29860	GSCOC_T00038897001	L-type lectin-domain containing receptor kinase	3.04843
Cc00_g22200	GSCOC_T00012731001	Uncharacterized protein	3.04765
Cc06_g19680	GSCOC_T00029037001	Disease resistance At4g27190	3.03976
Cc07_g05600	GSCOC_T00039837001	(S)-hydroxynitrile lyase	3.03813
Cc11_g11470	GSCOC_T00032442001	DNA-3-methyladenine glycosylase	3.03307
Cc11_g07780	GSCOC_T00018006001	Pathogenesis-related R major form	3.03127
Cc00_g23800	GSCOC_T00013528001	disease resistance RGA3	3.02155
Cc00_g24090	GSCOC_T00001079001	GDSL esterase lipase At1g28570	3.01977
Cc00_g18260	GSCOC_T00012288001	LRR receptor-like serine threonine- kinase ERL2	3.01925
Cc05_g03510	GSCOC_T00033574001	Cysteine-rich receptor kinase 6	3.01023
Cc04_g03920	GSCOC_T00022107001	Dehydrogenase reductase SDR family member 4	3.00926
Cc07_g13660	GSCOC_T00036709001	Geraniol dehydrogenase 1	2.98881
Cc00_g22470	GSCOC_T00009593001	COBRA 4	2.98518
Cc00_g23630	GSCOC_T00001062001	Disease resistance RGA2	2.98427
Cc05_g10390	GSCOC_T00021452001	Hyoscyamine 6-dioxygenase	2.98347
Cc10_g04510	GSCOC_T00034925001	Probable feruloyl esterase A	2.98182
Cc00_g15110	GSCOC_T00008523001	Uncharacterized protein	2.97818
Cc11_g05690	GSCOC_T00020534001	UDP-glycosyltransferase 83A1	2.97604
Cc01_g05240	GSCOC_T00011454001	Disease resistance RGA2	2.975
Cc11_g16860	GSCOC_T00038234001	Cytochrome P450 78A4	2.96804
Cc00_g14920	GSCOC_T00001123001	Germin 1-2	2.96408
Cc00_g15520	GSCOC_T00000738001	Beta- insoluble isoenzyme 1	2.96136
Cc00_g11990	GSCOC_T00000023001	disease resistance RGA4	2.95979
Cc00_g32580	GSCOC_T00010260001	Disease resistance RPM1	2.95936
Cc08_g06960	GSCOC_T00025284001	5-epiaristolochene synthase	2.95634
Cc01_g09730	GSCOC_T00024037001	Stress-response A B barrel domain-containing At5g22580	2.94652
Cc02_g08730	GSCOC_T00029756001	Uncharacterized protein	2.94599
Cc08_g07730	GSCOC_T00011861001	Uncharacterized protein	2.94489
Cc00_g15800	GSCOC_T00000089001	Uncharacterized protein	2.94189
Cc07_g13110	GSCOC_T00036787001	Ethylene-responsive transcription factor 1B	2.93743
Cc11_g08920	GSCOC_T00032811001	Uncharacterized protein	2.93461
Cc08_g13450	GSCOC_T00030343001	DETOXIFICATION 6	2.92818
Cc08_g01670	GSCOC_T00038348001	Disease resistance RPM1	2.92745
Cc02_g00220	GSCOC_T00019798001	Syntaxin-22	2.92654
Cc00_g11560	GSCOC_T00003165001	Disease resistance RGA2	2.9257
Cc00_g21880	GSCOC_T00013638001	UDP-glycosyltransferase 83A1	2.91814
Cc06_g08240	GSCOC_T00031156001	Stellacyanin	2.91422
Cc03_g08190	GSCOC_T00033215001	Uncharacterized protein	2.91018
Cc00_g06320	GSCOC_T00008055001	CCAAT enhancer-binding zeta	2.91
Cc05_g07250	GSCOC_T00042252001	Uncharacterized protein	2.90936
Cc05_g08030	GSCOC_T00016811001	Uncharacterized protein	2.90069
Cc07_g04710	GSCOC_T00039728001	Ocs element-binding factor 1	2.89947
Cc00_g20570	GSCOC_T00008769001	Pentatricopeptide repeat-containing At5g27460	2.89767
Cc07_g16730	GSCOC_T00037525001	Ethylene-responsive transcription factor ABR1	2.89657
Cc00_g35420	GSCOC_T00013778001	disease resistance RGA3	2.89634
Cc11_g16840	GSCOC_T00038231001	Uncharacterized protein	2.89311
Cc07_g10840	GSCOC_T00037066001	Pathogenesis-related 5	2.89253
Cc00_g26460	GSCOC_T00008104001	disease resistance RGA4	2.88761
Cc04_g15520	GSCOC_T00042324001	Mitochondrial outer membrane porin of 36 kDa	2.88395
Cc11_g15370	GSCOC_T00038047001	Uncharacterized protein	2.88269
Cc00_g03900	GSCOC_T00007596001	Uncharacterized protein	2.88152
Cc05_g00810	GSCOC_T00013173001	Hevamine-A	2.88043
Cc07_g11100	GSCOC_T00037039001	Heavy metal-associated isoprenylated plant 26	2.87677
Cc00_g12590	GSCOC_T00011634001	Cytochrome P450 81D1	2.87524
Cc01_g00040	GSCOC_T00012436001	Benzyl alcohol O-benzoyltransferase	2.86705
Cc02_g29580	GSCOC_T00018396001	Disease resistance response 206	2.86647
Cc05_g05650	GSCOC_T00035140001	Calcium-binding PBP1	2.86194
Cc08_g01660	GSCOC_T00038350001	Disease resistance RPM1	2.85524
Cc02_g37490	GSCOC_T00027982001	Probable pectinesterase 8	2.85464
Cc04_g03850	GSCOC_T00022100001	Uncharacterized protein	2.85328
Cc08_g01620	GSCOC_T00038359001	Disease resistance RPM1	2.85138
Cc05_g06620	GSCOC_T00042163001	disease resistance RGA3	2.84814
Cc02_g12150	GSCOC_T00029326001	Calcium-binding PBP1	2.84695
Cc01_g08050	GSCOC_T00015492001	late blight resistance homolog R1A-6	2.84653
Cc09_g00500	GSCOC_T00017942001	Microtubule-associated 70-4	2.84534
Cc00_g26670	GSCOC_T00002359001	disease resistance RGA1	2.84511
Cc02_g05960	GSCOC_T00039117001	Laccase-12	2.83704
Cc07_g17220	GSCOC_T00037463001	late blight resistance homolog R1B-17	2.83686
Cc00_g27540	GSCOC_T00000280001	Uncharacterized protein	2.83611
Cc01_g04990	GSCOC_T00028576001	Uncharacterized protein	2.8359
Cc03_g13940	GSCOC_T00031763001	disease resistance RGA1	2.83476
Cc02_g18120	GSCOC_T00014348001	9-divinyl ether synthase	2.83438
Cc03_g00940	GSCOC_T00025693001	DELLA RGL2	2.83293
Cc00_g33230	GSCOC_T00003235001	disease resistance RGA3	2.83127
Cc02_g09900	GSCOC_T00029594001	Uncharacterized protein	2.83126
Cc10_g03440	GSCOC_T00024869001	Probable vacuolar amino acid transporter YPQ1	2.82801
Cc06_g06800	GSCOC_T00031339001	Uncharacterized protein	2.82687
Cc05_g04560	GSCOC_T00031694001	late blight resistance homolog R1B-14	2.82679
Cc09_g03760	GSCOC_T00017506001	Serine carboxypeptidase-like 20	2.82317
Cc10_g10920	GSCOC_T00016644001	Auxin-induced 5NG4	2.81989
Cc08_g03560	GSCOC_T00034140001	Disease resistance response 206	2.81944
Cc03_g12700	GSCOC_T00015172001	disease resistance RGA3	2.81701
Cc11_g06860	GSCOC_T00020717001	1-aminocyclopropane-1-carboxylate oxidase homolog 1	2.81595
Cc11_g03100	GSCOC_T00025467001	UDP-glycosyltransferase 76E3	2.81509
Cc02_g08420	GSCOC_T00029795001	Uncharacterized protein	2.81286
Cc02_g01320	GSCOC_T00019952001	Uncharacterized protein	2.80947
Cc01_g06150	GSCOC_T00027453001	LRR receptor-like serine threonine- kinase EFR	2.80893
Cc11_g03080	GSCOC_T00025473001	UDP-glycosyltransferase 76E1	2.80852
Cc10_g05130	GSCOC_T00034851001	Uncharacterized protein	2.80437
Cc08_g17150	GSCOC_T00035704001	Uncharacterized protein	2.80341
Cc08_g15380	GSCOC_T00035467001	Uncharacterized protein	2.79792
Cc07_g02230	GSCOC_T00039406001	NADPH-dependent alkenal one chloroplastic	2.79555
Cc02_g22000	GSCOC_T00014855001	Actin-7	2.79332
Cc03_g14900	GSCOC_T00026739001	Probable glutathione S-transferase	2.79243
Cc10_g06600	GSCOC_T00034634001	Uncharacterized protein	2.79216
Cc10_g01690	GSCOC_T00024654001	Snakin-2	2.78996
Cc07_g17590	GSCOC_T00018878001	G-type lectin S-receptor-like serine threonine- kinase RLK1	2.78984
Cc03_g12660	GSCOC_T00015184001	disease resistance RGA3	2.78687
Cc01_g01720	GSCOC_T00037857001	disease resistance RGA1	2.78463
Cc04_g12750	GSCOC_T00008263001	(RS)-norcoclaurine 6-O-methyltransferase	2.78278
Cc11_g03130	GSCOC_T00025463001	UDP-glycosyltransferase 76E2	2.7798
Cc11_g02040	GSCOC_T00033036001	Probable disease resistance RXW24L	2.77238
Cc00_g13000	GSCOC_T00002078001	Uncharacterized protein	2.77222
Cc00_g19820	GSCOC_T00009625001	60S ribosomal L13a-2	2.77214
Cc01_g19760	GSCOC_T00016015001	Calcium permeable stress-gated cation channel 1	2.77114
Cc11_g02600	GSCOC_T00025562001	TIMELESS-interacting	2.76759
Cc00_g14360	GSCOC_T00003654001	late blight resistance homolog R1A-6	2.7666
Cc00_g19020	GSCOC_T00011100001	SRG1	2.76363
Cc00_g20190	GSCOC_T00006539001	Exosome complex component rrp4	2.76272
Cc09_g07240	GSCOC_T00036291001	Reticuline oxidase	2.7611
Cc06_g16180	GSCOC_T00030726001	Disease resistance RPP8 3	2.76017
Cc05_g07530	GSCOC_T00042284001	Extracellular ribonuclease LE	2.75769
Cc02_g29800	GSCOC_T00038884001	Cytochrome c oxidase assembly COX15	2.75697
Cc07_g18540	GSCOC_T00018737001	Probable polygalacturonase	2.75618
Cc00_g12530	GSCOC_T00002072001	ALWAYS EARLY 3	2.75513
Cc05_g01920	GSCOC_T00015782001	UDP-glucose flavonoid 3-O-glucosyltransferase 6	2.75481
Cc08_g13110	GSCOC_T00030383001	ODORANT1	2.75356
Cc03_g11380	GSCOC_T00019335001	Glucose-6-phosphate 1- chloroplastic	2.74896
Cc00_g32090	GSCOC_T00012293001	Cell division control 48 homolog B	2.74829
Cc08_g08850	GSCOC_T00017218001	UPF0481 At3g47200	2.74604
Cc09_g05250	GSCOC_T00007102001	Uncharacterized protein	2.74593
Cc02_g35040	GSCOC_T00011816001	Nicotianamine synthase	2.74279
Cc07_g15910	GSCOC_T00037634001	Cytochrome P450 71A1	2.74164
Cc11_g00330	GSCOC_T00019466001	Alpha-galactosidase	2.73969
Cc07_g03360	GSCOC_T00039563001	Zinc-finger homeodomain 2	2.73859
Cc00_g02090	GSCOC_T00001844001	Disease resistance RFL1	2.73714
Cc09_g00350	GSCOC_T00017960001	Uncharacterized protein	2.73537
Cc09_g05580	GSCOC_T00033445001	Probable LRR receptor-like serine threonine- kinase At3g47570	2.73507
Cc02_g04850	GSCOC_T00020414001	ABHD11	2.73216
Cc06_g19050	GSCOC_T00028954001	Benzyl alcohol O-benzoyltransferase	2.72869
Cc07_g19200	GSCOC_T00018625001	Aspartic ase nepenthesin-1	2.72417
Cc02_g29890	GSCOC_T00038914001	disease resistance RPP13 1	2.72316
Cc01_g12200	GSCOC_T00028147001	Licodione synthase	2.72195
Cc08_g01750	GSCOC_T00038339001	Cytochrome c oxidase subunit 6b-2	2.71799
Cc04_g15730	GSCOC_T00042351001	NRT1 PTR FAMILY	2.71423
Cc03_g08930	GSCOC_T00042746001	Uncharacterized protein	2.71117
Cc03_g01200	GSCOC_T00025725001	Uncharacterized protein	2.70954
Cc02_g02140	GSCOC_T00020060001	G-type lectin S-receptor-like serine threonine- kinase At5g24080	2.70611
Cc00_g06630	GSCOC_T00007484001	Bifunctional dihydroflavonol 4-reductase flavanone 4-reductase	2.70568
Cc07_g11790	GSCOC_T00036958001	Uncharacterized protein	2.70483
Cc06_g15940	GSCOC_T00030755001	Gibberellin 3-beta-dioxygenase 4	2.7015
Cc00_g06160	GSCOC_T00010056001	Indole-3-acetaldehyde oxidase	2.70106
Cc00_g12030	GSCOC_T00000029001	disease resistance RGA4	2.69953
Cc10_g04960	GSCOC_T00034869001	Quinone oxidoreductase PIG3	2.69899
Cc00_g11170	GSCOC_T00008684001	Uncharacterized protein	2.69517
Cc02_g25980	GSCOC_T00028671001	NRT1 PTR FAMILY	2.69123
Cc11_g15160	GSCOC_T00001009001	Uncharacterized protein	2.69088
Cc00_g31010	GSCOC_T00002438001	Disease resistance RPM1	2.68404
Cc07_g11610	GSCOC_T00036981001	Adipocyte plasma membrane-associated	2.68311
Cc10_g06610	GSCOC_T00034633001	Uncharacterized protein	2.68096
Cc06_g22760	GSCOC_T00040673001	Probable S-acyltransferase 3	2.68045
Cc00_g13020	GSCOC_T00002080001	Uncharacterized protein	2.6704
Cc08_g15180	GSCOC_T00035444001	Transcription factor MYB86	2.66892
Cc03_g02240	GSCOC_T00025862001	Uncharacterized protein	2.66286
Cc11_g08360	GSCOC_T00032886001	MLP 31	2.66283
Cc05_g02460	GSCOC_T00020964001	Disease resistance At4g27190	2.66189
Cc07_g15380	GSCOC_T00036482001	Probable trehalose-phosphate phosphatase J	2.65742
Cc07_g06530	GSCOC_T00039963001	DETOXIFICATION 6	2.65525
Cc00_g28540	GSCOC_T00010333001	UDP-glucose 6-dehydrogenase 1	2.65415
Cc09_g02490	GSCOC_T00017670001	Uncharacterized protein	2.64602
Cc02_g32480	GSCOC_T00001240001	Sugar transporter ERD6-like 8	2.64394
Cc00_g14190	GSCOC_T00009213001	Probable UDP-arabinopyranose mutase 2	2.6432
Cc00_g27860	GSCOC_T00012524001	Glucose 1-dehydrogenase B	2.64156
Cc10_g14810	GSCOC_T00033629001	Auxin-induced 5NG4	2.64138
Cc01_g14750	GSCOC_T00028485001	CHLOROPLAST IMPORT APPARATUS 2	2.63737
Cc00_g09140	GSCOC_T00011959001	disease resistance RGA3	2.63304
Cc05_g08330	GSCOC_T00016851001	Uncharacterized protein	2.63041
Cc05_g09250	GSCOC_T00002655001	Floral homeotic AGAMOUS	2.62632
Cc02_g12760	GSCOC_T00029241001	Metal-nicotianamine transporter YSL1	2.62497
Cc01_g02360	GSCOC_T00009718001	Uncharacterized protein	2.62425
Cc04_g07350	GSCOC_T00022548001	ASPARTIC PROTEASE IN GUARD CELL 1	2.62259
Cc00_g15950	GSCOC_T00007991001	Uncharacterized protein	2.62031
Cc02_g05280	GSCOC_T00039032001	Probable WRKY transcription factor 41	2.6202
Cc00_g30920	GSCOC_T00002387001	Uncharacterized protein	2.6171
Cc02_g33050	GSCOC_T00016746001	GDSL esterase lipase 5	2.6158
Cc08_g09400	GSCOC_T00017295001	Aquaporin TIP4-1	2.60606
Cc03_g10110	GSCOC_T00031013001	Splicing factor U2af small subunit A	2.60576
Cc00_g32140	GSCOC_T00006453001	Pectinesterase 2	2.60554
Cc00_g26020	GSCOC_T00004769001	Uncharacterized protein	2.60354
Cc02_g14900	GSCOC_T00013916001	Endoribonuclease Dicer homolog 2	2.6
Cc00_g16730	GSCOC_T00005167001	Uncharacterized protein	2.59839
Cc01_g00170	GSCOC_T00012417001	Cytochrome P450 716B2	2.59797
Cc06_g01390	GSCOC_T00023357001	Uncharacterized protein	2.59584
Cc02_g36620	GSCOC_T00003900001	LOB domain-containing 30	2.59184
Cc08_g06810	GSCOC_T00005443001	Uncharacterized protein	2.58953
Cc07_g20060	GSCOC_T00033921001	Probable glutathione S-transferase parC	2.58914
Cc06_g01050	GSCOC_T00023312001	LRR receptor-like serine threonine- kinase GSO2	2.58906
Cc02_g36480	GSCOC_T00003920001	F-box LRR-repeat At3g03360	2.58781
Cc04_g14550	GSCOC_T00040700001	Secologanin synthase	2.5872
Cc02_g35850	GSCOC_T00042782001	Uncharacterized protein	2.5832
Cc09_g03240	GSCOC_T00017575001	F-box At2g02240	2.57803
Cc03_g06630	GSCOC_T00026474001	Insulin-degrading enzyme-like peroxisomal	2.578
Cc02_g06950	GSCOC_T00039249001	Laccase-4	2.57735
Cc01_g08940	GSCOC_T00023932001	Germin 9-3	2.57514
Cc10_g09340	GSCOC_T00031558001	12-oxophytodienoate reductase 2	2.57434
Cc10_g15100	GSCOC_T00033677001	Ethylene-responsive transcription factor ABR1	2.57402
Cc06_g01990	GSCOC_T00023439001	Copper transporter 1	2.57035
Cc10_g08180	GSCOC_T00034427001	Uncharacterized protein sll0103	2.567
Cc07_g00050	GSCOC_T00019067001	GDSL esterase lipase At5g14450	2.56457
Cc04_g16960	GSCOC_T00035817001	STRICTOSIDINE SYNTHASE-LIKE 12	2.55932
Cc07_g18590	GSCOC_T00018730001	Auxin-induced 5NG4	2.55479
Cc01_g15110	GSCOC_T00016604001	Peroxidase 4	2.55447
Cc08_g06860	GSCOC_T00025231001	Uncharacterized protein	2.55222
Cc01_g00400	GSCOC_T00005540001	ATP-dependent RNA helicase DBP2	2.54762
Cc11_g01030	GSCOC_T00019655001	Proline--tRNA ligase	2.54672
Cc02_g30040	GSCOC_T00038950001	calcium-transporting ATPase plasma membrane-type	2.54566
Cc11_g07480	GSCOC_T00018049001	Receptor 12	2.54386
Cc03_g06270	GSCOC_T00026417001	Plasmodesmata-located 2	2.54202
Cc11_g03870	GSCOC_T00033996001	Glycerophosphodiester periplasmic	2.53926
Cc00_g31120	GSCOC_T00009994001	disease resistance RGA4	2.53813
Cc00_g24640	GSCOC_T00005998001	Ankyrin repeat-containing At5g02620	2.53761
Cc03_g15350	GSCOC_T00026814001	(+)-pulegone reductase	2.53622
Cc00_g02060	GSCOC_T00001838001	Uncharacterized protein	2.53225
Cc00_g32920	GSCOC_T00001516001	disease resistance RGA1	2.53166
Cc00_g34810	GSCOC_T00005682001	L-type lectin-domain containing receptor kinase	2.52926
Cc04_g10400	GSCOC_T00042588001	Cucumisin	2.52925
Cc07_g13420	GSCOC_T00036739001	GDSL esterase lipase At5g37690	2.52769
Cc03_g07180	GSCOC_T00026560001	Uncharacterized protein	2.52702
Cc04_g06830	GSCOC_T00022482001	Uncharacterized protein	2.52213
Cc06_g14650	GSCOC_T00041228001	DETOXIFICATION 2	2.5221
Cc04_g16290	GSCOC_T00035715001	NAC domain-containing 100	2.51756
Cc00_g13600	GSCOC_T00011110001	(	2.51748
Cc02_g08440	GSCOC_T00029793001	Uncharacterized protein	2.5148
Cc02_g27160	GSCOC_T00025036001	Vicianin hydrolase (Fragment)	2.51375
Cc01_g21770	GSCOC_T00004940001	S-acyltransferase 18	2.50927
Cc11_g15880	GSCOC_T00038114001	GDSL esterase lipase At3g26430	2.50514
Cc07_g17340	GSCOC_T00037443001	Peroxidase 5	2.50317
Cc05_g13260	GSCOC_T00021087001	ABC transporter B family member 18	2.502
Cc06_g16860	GSCOC_T00004140001	Probable galactinol--sucrose galactosyltransferase 2	2.50005
Cc02_g25360	GSCOC_T00028756001	Ankyrin repeat-containing At5g02620	2.49545
Cc00_g34670	GSCOC_T00010847001	Uncharacterized protein	2.49463
Cc10_g04950	GSCOC_T00034871001	Uncharacterized protein	2.49415
Cc08_g05280	GSCOC_T00007027001	Topless-related 4	2.4934
Cc10_g04210	GSCOC_T00034964001	UDP-glucuronate:xylan alpha-glucuronosyltransferase 2	2.49255
Cc08_g12110	GSCOC_T00030526001	Cytochrome P450 71D10	2.49072
Cc00_g29570	GSCOC_T00008662001	Glutamate dehydrogenase	2.48355
Cc00_g13230	GSCOC_T00007875001	F-box At4g00755	2.48328
Cc02_g15480	GSCOC_T00013996001	Cellulose synthase A catalytic subunit	2.48061
Cc08_g03500	GSCOC_T00034131001	Alpha beta hydrolase domain-containing 17B	2.47961
Cc07_g09190	GSCOC_T00040315001	Phaseolin	2.47932
Cc06_g18770	GSCOC_T00028905001	methyltransferase DDB_G0268948	2.4766
Cc04_g12740	GSCOC_T00008259001	Phospho-2-dehydro-3-deoxyheptonate aldolase chloroplastic	2.47109
Cc00_g05930	GSCOC_T00004280001	Pentatricopeptide repeat-containing At3g16610	2.46892
Cc06_g19710	GSCOC_T00029044001	Disease resistance At4g27190	2.46879
Cc05_g14210	GSCOC_T00038849001	Glucan endo-	2.46413
Cc05_g16520	GSCOC_T00038548001	G2 mitotic-specific cyclin-1	2.46241
Cc06_g22350	GSCOC_T00017197001	F-box At5g07610	2.46185
Cc11_g03140	GSCOC_T00025462001	UDP-glycosyltransferase 76E1	2.46161
Cc11_g04460	GSCOC_T00004793001	Uncharacterized acetyltransferase At3g50280	2.46052
Cc02_g16180	GSCOC_T00014095001	GDSL esterase lipase At1g29670	2.45991
Cc03_g12610	GSCOC_T00015192001	Cytochrome P450 704C1	2.45901
Cc10_g03410	GSCOC_T00024865001	Probable galacturonosyltransferase-like 1	2.45765
Cc02_g17460	GSCOC_T00014263001	Epoxide hydrolase 3	2.45637
Cc02_g05590	GSCOC_T00039071001	High mobility group B 7	2.4562
Cc06_g20550	GSCOC_T00022998001	Pentatricopeptide repeat-containing mitochondrial	2.45239
Cc08_g16320	GSCOC_T00035589001	3-oxoacyl	2.44822
Cc06_g14690	GSCOC_T00041223001	Cellulose synthase A catalytic subunit	2.44433
Cc02_g11910	GSCOC_T00029357001	Transcription factor DYT1	2.44315
Cc00_g34170	GSCOC_T00003988001	Peptide methionine sulfoxide reductase A5	2.44302
Cc02_g29190	GSCOC_T00004494001	F-box FBD LRR-repeat At4g26340	2.44006
Cc03_g08200	GSCOC_T00033216001	Uncharacterized protein	2.43718
Cc01_g09160	GSCOC_T00023961001	Serine carboxypeptidase-like 2	2.4335
Cc04_g13440	GSCOC_T00018287001	Snakin-2	2.43161
Cc03_g10990	GSCOC_T00042047001	Cytochrome P450 71A2	2.43026
Cc02_g31770	GSCOC_T00027495001	ADP-ribosylation factor	2.42988
Cc02_g05680	GSCOC_T00039082001	BTB POZ domain-containing At3g56230	2.42781
Cc07_g15940	GSCOC_T00037630001	Cytochrome P450 84A1	2.42692
Cc00_g15220	GSCOC_T00001823001	(+)-menthofuran synthase	2.42417
Cc01_g03970	GSCOC_T00040873001	Isoflavone reductase homolog P3	2.42301
Cc01_g12260	GSCOC_T00028156001	Aquaporin TIP1-1	2.42269
Cc05_g10780	GSCOC_T00021398001	Uncharacterized protein	2.41975
Cc05_g13200	GSCOC_T00021094001	Probable galacturonosyltransferase 12	2.41754
Cc11_g07160	GSCOC_T00018092001	Defensin	2.41733
Cc07_g10920	GSCOC_T00037058001	Rhodanese-like domain-containing 17	2.40554
Cc02_g16090	GSCOC_T00014084001	Monothiol glutaredoxin-S2	2.40503
Cc08_g04060	GSCOC_T00034210001	G-type lectin S-receptor-like serine threonine- kinase CES101	2.40467
Cc00_g18270	GSCOC_T00012290001	Receptor 12	2.39902
Cc03_g12940	GSCOC_T00030634001	Uncharacterized protein	2.39798
Cc07_g08580	GSCOC_T00040237001	glutamine amidotransferase	2.39739
Cc02_g21140	GSCOC_T00014750001	Uncharacterized protein	2.39439
Cc07_g13530	GSCOC_T00036725001	RSI-1	2.39292
Cc02_g36090	GSCOC_T00042750001	Probable (S)-N-methylcoclaurine 3 -hydroxylase isozyme 2	2.39249
Cc05_g01750	GSCOC_T00015751001	Cytochrome P450 82G1	2.39223
Cc10_g13930	GSCOC_T00035219001	Probable LRR receptor-like serine threonine- kinase At2g16250	2.39186
Cc00_g28860	GSCOC_T00003284001	60S ribosomal L17-2	2.39061
Cc04_g15750	GSCOC_T00042353001	NRT1 PTR FAMILY	2.38877
Cc08_g06820	GSCOC_T00025224001	TMV resistance N	2.38804
Cc04_g05860	GSCOC_T00022355001	Ethylene-responsive transcription factor ERF114	2.38501
Cc04_g14730	GSCOC_T00040735001	disease resistance RPP13 1	2.3834
Cc02_g30460	GSCOC_T00023763001	Perakine reductase	2.38287
Cc00_g34770	GSCOC_T00001164001	disease resistance RGA3	2.3814
Cc03_g11680	GSCOC_T00043187001	disease resistance RGA4	2.38096
Cc01_g13110	GSCOC_T00028271001	Laccase-3	2.37816
Cc03_g10450	GSCOC_T00031063001	Pirin	2.37776
Cc02_g07080	GSCOC_T00039267001	Uncharacterized protein	2.37241
Cc03_g15540	GSCOC_T00026839001	homolog subfamily B member 6-A	2.37001
Cc08_g07980	GSCOC_T00007314001	Uncharacterized protein	2.36738
Cc10_g08600	GSCOC_T00034367001	HEADING DATE 3A	2.36271
Cc00_g16410	GSCOC_T00001510001	Uncharacterized protein	2.35826
Cc05_g00960	GSCOC_T00009655001	disease resistance RGA3	2.35801
Cc07_g08550	GSCOC_T00040232001	Probable non-specific lipid-transfer AKCS9	2.35281
Cc05_g04710	GSCOC_T00035003001	Vacuolar amino acid transporter 1	2.35057
Cc02_g39250	GSCOC_T00027744001	Long chain acyl- synthetase 3	2.34783
Cc10_g09560	GSCOC_T00031528001	Uncharacterized protein	2.34396
Cc00_g16370	GSCOC_T00011224001	Glutamate receptor	2.34388
Cc08_g03720	GSCOC_T00034159001	Disease resistance RPM1	2.34049
Cc01_g17930	GSCOC_T00016263001	Cellulose synthase A catalytic subunit	2.33833
Cc00_g08030	GSCOC_T00006062001	NAC domain-containing 100	2.33736
Cc01_g16460	GSCOC_T00016438001	mRNA-capping enzyme	2.33682
Cc02_g21480	GSCOC_T00014790001	Uncharacterized protein	2.33525
Cc02_g27350	GSCOC_T00025065001	Uncharacterized protein	2.33487
Cc00_g34120	GSCOC_T00007686001	disease resistance RGA4	2.33372
Cc07_g11550	GSCOC_T00036989001	Endochitinase	2.33255
Cc10_g13360	GSCOC_T00035305001	Uncharacterized protein	2.32675
Cc04_g03910	GSCOC_T00022106001	EH domain-containing 1	2.32583
Cc04_g14350	GSCOC_T00004340001	Uncharacterized protein	2.31963
Cc00_g30460	GSCOC_T00012255001	Probable E3 ubiquitin- ligase RNF217	2.31914
Cc00_g17850	GSCOC_T00008901001	UDP-glycosyltransferase 91C1	2.31851
Cc05_g11140	GSCOC_T00021353001	Epidermis-specific secreted glyco EP1	2.31805
Cc00_g09170	GSCOC_T00012168001	Uncharacterized protein	2.3155
Cc05_g06100	GSCOC_T00009863001	Beta-amylase	2.31324
Cc07_g17640	GSCOC_T00018871001	G-type lectin S-receptor-like serine threonine- kinase RLK1	2.31125
Cc00_g29600	GSCOC_T00002220001	Cellulose synthase B6	2.31122
Cc02_g16580	GSCOC_T00014151001	Uncharacterized protein	2.30752
Cc00_g30730	GSCOC_T00009215001	Uncharacterized protein	2.30437
Cc06_g22270	GSCOC_T00017181001	Uncharacterized protein	2.30137
Cc03_g11720	GSCOC_T00043191001	disease resistance RGA3	2.29999
Cc04_g01310	GSCOC_T00021774001	Uncharacterized protein Mb2734	2.2987
Cc11_g08520	GSCOC_T00032862001	Probable sulfate transporter	2.29807
Cc08_g11350	GSCOC_T00027136001	Uncharacterized protein	2.29221
Cc00_g03700	GSCOC_T00013256001	Codeine O-demethylase	2.28954
Cc08_g02230	GSCOC_T00037685001	Disease resistance RPM1	2.28844
Cc08_g08980	GSCOC_T00017236001	UDP-glucose flavonoid 3-O-glucosyltransferase 3	2.28661
Cc10_g06840	GSCOC_T00034605001	Uncharacterized protein	2.28598
Cc11_g12170	GSCOC_T00032353001	Beta-glucosidase 40	2.28577
Cc05_g07320	GSCOC_T00042259001	Transcription factor bHLH36	2.28573
Cc09_g00800	GSCOC_T00017903001	Tonoplast dicarboxylate transporter	2.28555
Cc06_g06630	GSCOC_T00031360001	E3 ubiquitin- ligase PUB23	2.28287
Cc01_g05630	GSCOC_T00027372001	Premnaspirodiene oxygenase	2.28245
Cc00_g10630	GSCOC_T00003947001	Pentatricopeptide repeat-containing At4g16470	2.28147
Cc03_g14660	GSCOC_T00026694001	late blight resistance homolog R1B-17	2.27993
Cc08_g11110	GSCOC_T00027104001	Caskin-2	2.27794
Cc01_g02340	GSCOC_T00009721001	Uncharacterized protein	2.27712
Cc04_g05600	GSCOC_T00022320001	Germin subfamily 3 member 4	2.27647
Cc00_g16530	GSCOC_T00002357001	Probable acyl-activating enzyme peroxisomal	2.275
Cc02_g17380	GSCOC_T00014250001	Isoflavone reductase homolog	2.26605
Cc05_g02870	GSCOC_T00020870001	Ribosomal RNA small subunit methyltransferase NEP1	2.26388
Cc02_g24290	GSCOC_T00002342001	Flavin-containing monooxygenase FMO GS-OX5	2.26294
Cc00_g05990	GSCOC_T00000120001	MDIS1-interacting receptor like kinase 2	2.26282
Cc07_g14300	GSCOC_T00036631001	Cyclin-D2-1	2.2609
Cc00_g26240	GSCOC_T00012616001	NRT1 PTR FAMILY	2.26022
Cc07_g20540	GSCOC_T00015721001	CCR4-NOT transcription complex subunit 11	2.25685
Cc03_g10320	GSCOC_T00031044001	late blight resistance homolog R1B-14	2.25387
Cc00_g27040	GSCOC_T00000981001	late blight resistance homolog R1B-16	2.25318
Cc06_g07740	GSCOC_T00031221001	SRG1	2.25298
Cc03_g03180	GSCOC_T00025997001	Basic 7S globulin	2.25211
Cc11_g00890	GSCOC_T00019682001	late blight resistance homolog R1B-17	2.25029
Cc00_g32000	GSCOC_T00009493001	Dihydroflavonol 4-reductase	2.24919
Cc01_g12850	GSCOC_T00028236001	Metallothionein 1	2.24665
Cc01_g04850	GSCOC_T00028549001	Uncharacterized protein	2.24583
Cc05_g06110	GSCOC_T00009865001	Beta-amylase	2.24479
Cc03_g10350	GSCOC_T00031050001	Pirin	2.24416
Cc06_g01800	GSCOC_T00023414001	O-fucosyltransferase 1	2.24239
Cc02_g21890	GSCOC_T00014839001	NAC domain-containing 71	2.2413
Cc01_g03980	GSCOC_T00040868001	G-type lectin S-receptor-like serine threonine- kinase RLK1	2.24096
Cc00_g23580	GSCOC_T00010323001	Isoflavone reductase homolog A622	2.23741
Cc00_g07950	GSCOC_T00009227001	Alcohol dehydrogenase-like 6	2.23623
Cc02_g18340	GSCOC_T00014374001	Probable esterase PIR7A	2.22935
Cc03_g12840	GSCOC_T00015143001	disease resistance RGA4	2.22426
Cc06_g19860	GSCOC_T00022868001	Ankyrin repeat-containing ITN1	2.22131
Cc00_g27080	GSCOC_T00004251001	Uncharacterized protein	2.21607
Cc06_g07990	GSCOC_T00031189001	Inorganic phosphate transporter 1-4	2.2139
Cc02_g23670	GSCOC_T00015069001	Uncharacterized protein	2.21388
Cc03_g10430	GSCOC_T00031060001	late blight resistance homolog R1B-12	2.21216
Cc03_g11190	GSCOC_T00042079001	Asparagine synthetase domain-containing 1	2.20988
Cc07_g18720	GSCOC_T00018709001	Probable S-adenosylmethionine-dependent methyltransferase At5g37990	2.20953
Cc02_g29230	GSCOC_T00004503001	Flavonoid 3	2.20834
Cc00_g06260	GSCOC_T00010080001	Shikimate O-hydroxycinnamoyltransferase	2.2068
Cc00_g27150	GSCOC_T00000739001	Probable tocopherol O- chloroplastic	2.20665
Cc02_g26920	GSCOC_T00025001001	Uncharacterized protein	2.2062
Cc01_g06760	GSCOC_T00030076001	6-hydroxynicotinate 3-monooxygenase	2.20515
Cc02_g29340	GSCOC_T00018351001	amidase	2.20477
Cc00_g13050	GSCOC_T00010498001	Glutamate dehydrogenase A	2.20416
Cc04_g00960	GSCOC_T00021726001	ABC transporter B family member 19	2.20206
Cc11_g07770	GSCOC_T00018007001	Pathogenesis-related R major form	2.20094
Cc05_g05080	GSCOC_T00035060001	Cytochrome P450 71D10	2.20094
Cc02_g25200	GSCOC_T00028781001	Probable WRKY transcription factor 12	2.19933
Cc10_g05740	GSCOC_T00034772001	Sigma factor regulation	2.19567
Cc08_g06180	GSCOC_T00040974001	Receptor kinase 2	2.19101
Cc03_g06970	GSCOC_T00026529001	Uncharacterized protein	2.19066
Cc11_g15300	GSCOC_T00038040001	Probable polygalacturonase At1g80170	2.18856
Cc09_g10480	GSCOC_T00041039001	Uncharacterized protein	2.18735
Cc07_g13100	GSCOC_T00036793001	Ethylene-responsive transcription factor 1B	2.18725
Cc07_g19850	GSCOC_T00033883001	Bifunctional monodehydroascorbate reductase and carbonic anhydrase nectarin-3	2.18717
Cc07_g12670	GSCOC_T00036845001	Uncharacterized protein	2.18687
Cc00_g00100	GSCOC_T00036083001	Uncharacterized protein	2.18618
Cc03_g04190	GSCOC_T00026128001	IQ-DOMAIN 31	2.18237
Cc02_g35050	GSCOC_T00011818001	Homeobox knotted-1-like 1	2.17766
Cc00_g33010	GSCOC_T00006003001	disease resistance RGA1	2.17578
Cc03_g01730	GSCOC_T00025795001	UDP-glucuronic acid decarboxylase 1	2.17575
Cc02_g14000	GSCOC_T00029070001	Homeobox-leucine zipper ATHB-52	2.17283
Cc09_g03630	GSCOC_T00017522001	MADS-box transcription factor 3	2.17282
Cc02_g24320	GSCOC_T00002339001	Flavin-containing monooxygenase FMO GS-OX5	2.17236
Cc00_g25800	GSCOC_T00009824001	Uncharacterized protein	2.17189
Cc03_g02710	GSCOC_T00025938001	Uncharacterized protein	2.17158
Cc11_g07530	GSCOC_T00018044001	LRR receptor-like serine threonine- kinase GSO1	2.17149
Cc11_g07710	GSCOC_T00018015001	Two-component response regulator ARR1	2.16994
Cc02_g12320	GSCOC_T00029299001	MOTHER of FT and TFL1	2.16963
Cc02_g25640	GSCOC_T00028723001	invertase inhibitor	2.16761
Cc07_g03720	GSCOC_T00039617001	Probable serine threonine- kinase At1g54610	2.16551
Cc08_g05580	GSCOC_T00024337001	B3 domain-containing Os04g0386900	2.16416
Cc00_g10130	GSCOC_T00009187001	Exosome component 10	2.16254
Cc10_g12700	GSCOC_T00031989001	Cactin	2.16245
Cc09_g08830	GSCOC_T00023161001	Probable LRR receptor-like serine threonine- kinase At3g47570	2.16107
Cc00_g08150	GSCOC_T00000289001	Cytochrome P450 98A2	2.15965
Cc05_g05950	GSCOC_T00035183001	Equilibrative nucleoside transporter 4	2.15888
Cc11_g16950	GSCOC_T00038248001	Uncharacterized protein	2.15784
Cc08_g10470	GSCOC_T00027015001	UPF0481 At3g47200	2.15633
Cc01_g00500	GSCOC_T00011029001	50S ribosomal chloroplastic	2.1554
Cc01_g10980	GSCOC_T00024214001	UDP-xylose transporter 3	2.15533
Cc11_g15750	GSCOC_T00038093001	Uncharacterized protein	2.15495
Cc01_g08690	GSCOC_T00023901001	Momilactone A synthase	2.15102
Cc00_g31050	GSCOC_T00007711001	Miraculin	2.14863
Cc07_g06260	GSCOC_T00039925001	Uncharacterized protein	2.14827
Cc00_g11350	GSCOC_T00007943001	Beta-glucosidase 11	2.14565
Cc02_g08550	GSCOC_T00029778001	Probable membrane-associated kinase regulator 4	2.14376
Cc02_g13000	GSCOC_T00029212001	NADPH:quinone oxidoreductase	2.14315
Cc07_g19000	GSCOC_T00018653001	Probable calcium-binding CML25	2.13648
Cc01_g18490	GSCOC_T00016199001	1-aminocyclopropane-1-carboxylate oxidase homolog 1	2.13639
Cc00_g02690	GSCOC_T00006658001	Subtilisin-like protease	2.13417
Cc01_g01150	GSCOC_T00037975001	Uncharacterized protein	2.1298
Cc04_g05230	GSCOC_T00022270001	Shikimate O-hydroxycinnamoyltransferase	2.12852
Cc01_g05000	GSCOC_T00028577001	Myb family transcription factor At1g14600	2.12813
Cc06_g01670	GSCOC_T00023397001	Probable anion transporter chloroplastic	2.12723
Cc08_g04340	GSCOC_T00034256001	Isoflavone reductase homolog	2.12662
Cc02_g39520	GSCOC_T00027704001	Auxin response factor 7	2.1236
Cc00_g19950	GSCOC_T00002044001	late blight resistance homolog R1B-16	2.12248
Cc00_g17300	GSCOC_T00001366001	Cysteine-rich receptor kinase 10	2.12246
Cc00_g19760	GSCOC_T00008869001	disease resistance RGA3	2.11992
Cc00_g10150	GSCOC_T00000010001	late blight resistance homolog R1B-12	2.11712
Cc02_g15000	GSCOC_T00013930001	Uncharacterized protein	2.11673
Cc02_g25940	GSCOC_T00028678001	Uncharacterized protein	2.11661
Cc09_g09090	GSCOC_T00023108001	Probable purine permease 10	2.11648
Cc04_g02100	GSCOC_T00021878001	ABC transporter C family member 8	2.11647
Cc11_g14550	GSCOC_T00032044001	Aldehyde dehydrogenase family 2 member mitochondrial	2.11461
Cc06_g11220	GSCOC_T00041684001	K(+) efflux antiporter 6	2.11447
Cc10_g11720	GSCOC_T00007300001	Miraculin	2.11415
Cc00_g35780	GSCOC_T00008950001	Germin subfamily 1 member 7	2.11389
Cc00_g28340	GSCOC_T00010408001	UDP-glycosyltransferase 75C1	2.11265
Cc00_g22430	GSCOC_T00010091001	Uncharacterized protein	2.11251
Cc07_g11160	GSCOC_T00037032001	RING finger 44	2.11079
Cc00_g23040	GSCOC_T00012932001	TMV resistance N	2.10953
Cc10_g02520	GSCOC_T00024756001	Sec14 cytosolic factor	2.10889
Cc04_g02600	GSCOC_T00021935001	ABC transporter G family member 36	2.10849
Cc00_g27700	GSCOC_T00008599001	disease resistance RGA3	2.10721
Cc11_g01950	GSCOC_T00033048001	Probable disease resistance RPP8 2	2.10677
Cc06_g12810	GSCOC_T00041492001	Probable pectinesterase pectinesterase inhibitor 54	2.10644
Cc05_g11440	GSCOC_T00021315001	IQ-DOMAIN 14	2.10574
Cc00_g29130	GSCOC_T00010957001	ROOT HAIR DEFECTIVE 3 homolog 1	2.10448
Cc01_g10460	GSCOC_T00024142001	Uncharacterized protein	2.10371
Cc00_g32700	GSCOC_T00005667001	Disease resistance RGA2	2.09761
Cc02_g26860	GSCOC_T00024993001	Probable mitochondrial chaperone bcs1	2.09717
Cc02_g20880	GSCOC_T00014710001	Uncharacterized protein	2.09627
Cc00_g00230	GSCOC_T00036100001	B3 domain-containing Os11g0197600	2.09263
Cc00_g30180	GSCOC_T00006926001	late blight resistance homolog R1A-6	2.0858
Cc02_g35720	GSCOC_T00042803001	Pleiotropic drug resistance 3	2.08553
Cc06_g15420	GSCOC_T00030830001	Chitotriosidase-1	2.08337
Cc09_g04350	GSCOC_T00017438001	L-ascorbate oxidase homolog	2.08117
Cc02_g21800	GSCOC_T00014827001	Aminotransferase chloroplastic	2.07983
Cc02_g12590	GSCOC_T00029264001	Beta-galactosidase 6	2.07918
Cc06_g22480	GSCOC_T00012875001	UDP-glucose flavonoid 3-O-glucosyltransferase 6	2.07911
Cc10_g09930	GSCOC_T00031482001	NRT1 PTR FAMILY	2.07726
Cc06_g18240	GSCOC_T00040431001	Glucan endo-	2.07714
Cc03_g09930	GSCOC_T00030984001	Probable aldo-keto reductase 2	2.073
Cc07_g09400	GSCOC_T00037248001	Uncharacterized protein	2.07267
Cc02_g12130	GSCOC_T00029329001	G-type lectin S-receptor-like serine threonine- kinase B120	2.07221
Cc00_g19130	GSCOC_T00000895001	Uncharacterized protein	2.0722
Cc06_g06970	GSCOC_T00031319001	Calcium-dependent kinase 20	2.07116
Cc08_g02030	GSCOC_T00037662001	Disease resistance RPM1	2.06942
Cc08_g15860	GSCOC_T00035530001	Hydroquinone glucosyltransferase	2.06844
Cc00_g05700	GSCOC_T00006256001	Dihydropyrimidinase	2.06624
Cc00_g33180	GSCOC_T00003246001	Endochitinase B	2.06406
Cc10_g11520	GSCOC_T00008276001	Wall-associated receptor kinase 2	2.06258
Cc10_g10220	GSCOC_T00031439001	Probable E3 ubiquitin- ligase ARI2	2.06038
Cc03_g07230	GSCOC_T00026566001	Probable pectate lyase 15	2.05993
Cc02_g24560	GSCOC_T00028868001	Metalloendo ase 1	2.05806
Cc06_g15260	GSCOC_T00030856001	Uncharacterized protein	2.05793
Cc06_g15450	GSCOC_T00030823001	Receptor-like serine threonine- kinase SD1-7	2.05763
Cc00_g04500	GSCOC_T00013588001	Indole-3-acetic acid-amido synthetase	2.05686
Cc11_g06460	GSCOC_T00020659001	Cation H(+) antiporter 20	2.05611
Cc04_g00970	GSCOC_T00021727001	Uncharacterized protein	2.05606
Cc10_g10080	GSCOC_T00031458001	Multiple C2 and transmembrane domain-containing 1	2.05385
Cc02_g04880	GSCOC_T00020418001	Cyclin-U4-1	2.05361
Cc00_g24390	GSCOC_T00002089001	Phospholipase A1- chloroplastic	2.05315
Cc02_g37330	GSCOC_T00028007001	Probable methyltransferase PMT16	2.05269
Cc06_g17740	GSCOC_T00040362001	Uncharacterized protein	2.05248
Cc10_g02660	GSCOC_T00024772001	Isoflavone reductase homolog P3	2.04742
Cc01_g15200	GSCOC_T00016592001	Uncharacterized protein	2.04295
Cc05_g06560	GSCOC_T00042151001	DNA excision repair ERCC-6-like 2	2.04254
Cc02_g21410	GSCOC_T00014782001	Metacaspase-1	2.04193
Cc06_g09430	GSCOC_T00041915001	Uncharacterized protein	2.0408
Cc03_g00230	GSCOC_T00025601001	S-adenosylmethionine synthase 2	2.03888
Cc00_g01040	GSCOC_T00015800001	Uncharacterized protein	2.03741
Cc00_g35430	GSCOC_T00007032001	Serine threonine- kinase SAPK3	2.03706
Cc02_g21360	GSCOC_T00014777001	UDP-glycosyltransferase 85A2	2.0369
Cc02_g17410	GSCOC_T00014253001	Laccase-11	2.03389
Cc02_g27260	GSCOC_T00025053001	Beta-glucosidase 12	2.0321
Cc06_g14180	GSCOC_T00041290001	HD domain-containing 2	2.03129
Cc00_g10740	GSCOC_T00009008001	NLP4	2.03004
Cc02_g23370	GSCOC_T00015030001	Uncharacterized protein	2.0293
Cc11_g12740	GSCOC_T00032276001	NAC transcription factor 29	2.02484
Cc00_g08840	GSCOC_T00011516001	Thymidine kinase	2.02421
Cc01_g01100	GSCOC_T00037984001	UDP-glycosyltransferase 85A3	2.02386
Cc06_g07980	GSCOC_T00031190001	Actin-depolymerizing factor	2.02305
Cc06_g01260	GSCOC_T00023340001	SRG1	2.02143
Cc00_g30520	GSCOC_T00013512001	Miraculin	2.02082
Cc11_g17500	GSCOC_T00038323001	E3 ubiquitin ligase DRIP2	2.02045
Cc04_g14560	GSCOC_T00040705001	L-type lectin-domain containing receptor kinase	2.02008
Cc09_g09900	GSCOC_T00041120001	SRG1	2.01853
Cc03_g03710	GSCOC_T00026070001	Uncharacterized protein	2.01796
Cc07_g06080	GSCOC_T00039902001	Serine threonine- kinase BCK1 SLK1 SSP31	2.01713
Cc04_g01340	GSCOC_T00021779001	Germin subfamily 3 member 3	2.01443
Cc11_g01050	GSCOC_T00019651001	Probable RNA helicase SDE3	2.01099
Cc00_g00960	GSCOC_T00041159001	Germin subfamily 1 member 7	2.00784
Cc00_g25770	GSCOC_T00008868001	Uncharacterized protein	2.0071
Cc07_g19950	GSCOC_T00033902001	Uncharacterized protein	2.00616
Cc10_g02940	GSCOC_T00024808001	Uncharacterized protein	2.00595
Cc00_g32620	GSCOC_T00003208001	Ankyrin-1	2.00262
Cc11_g15760	GSCOC_T00038094001	Uncharacterized protein	2.00038
Cc01_g05640	GSCOC_T00027374001	Uncharacterized protein	1.99984
Cc00_g30480	GSCOC_T00003185001	Disease resistance RGA2	1.99733
Cc03_g02220	GSCOC_T00025860001	Uncharacterized protein	1.99722
Cc02_g13700	GSCOC_T00029111001	Ethylene-responsive transcription factor 9	1.99716
Cc02_g00060	GSCOC_T00019780001	Uncharacterized protein	1.99623
Cc02_g12990	GSCOC_T00029213001	NADPH:quinone oxidoreductase	1.99224
Cc09_g00490	GSCOC_T00017943001	Microtubule-associated 70-5	1.99132
Cc02_g13430	GSCOC_T00029158001	Uncharacterized protein	1.98945
Cc00_g15660	GSCOC_T00008806001	HEADING DATE 3A	1.98486
Cc07_g17010	GSCOC_T00037486001	Auxin-induced 5NG4	1.98378
Cc07_g18920	GSCOC_T00018667001	Pentatricopeptide repeat-containing At1g62590	1.98352
Cc02_g12620	GSCOC_T00029261001	Endonuclease 4	1.98324
Cc05_g11000	GSCOC_T00021370001	Pathogen-related	1.98207
Cc02_g39750	GSCOC_T00027673001	Uncharacterized protein	1.98183
Cc08_g02180	GSCOC_T00037679001	Disease resistance RPM1	1.9806
Cc11_g09390	GSCOC_T00032734001	Disease resistance RPP13	1.9791
Cc05_g11470	GSCOC_T00021311001	Probable calcium-binding CML10	1.97812
Cc02_g07910	GSCOC_T00029876001	Uncharacterized protein	1.97759
Cc05_g16290	GSCOC_T00038580001	Myb-related Zm1	1.97535
Cc04_g13770	GSCOC_T00035883001	Probable serine threonine- kinase CST	1.97177
Cc06_g04300	GSCOC_T00023744001	Transcription factor RAX2	1.97086
Cc05_g09650	GSCOC_T00021556001	Chlorophyll a-b binding chloroplastic (Fragments)	1.96892
Cc11_g13370	GSCOC_T00032188001	SNF1-related kinase regulatory subunit gamma-1-like	1.96874
Cc08_g06360	GSCOC_T00040940001	Uncharacterized protein	1.96537
Cc08_g13140	GSCOC_T00030377001	Flavonoid 3 -monooxygenase	1.96446
Cc03_g11290	GSCOC_T00004444001	Cell division control 48 homolog B	1.96142
Cc02_g19330	GSCOC_T00014498001	Uncharacterized protein	1.96125
Cc07_g06180	GSCOC_T00039914001	Filament-like plant 7	1.96042
Cc11_g11290	GSCOC_T00032465001	Ocs element-binding factor 1	1.96038
Cc06_g22850	GSCOC_T00040660001	Short-chain type dehydrogenase reductase	1.95837
Cc00_g04090	GSCOC_T00013736001	pentatricopeptide repeat-containing mitochondrial	1.95797
Cc02_g36060	GSCOC_T00042755001	Uncharacterized protein	1.95661
Cc03_g05620	GSCOC_T00026324001	Uncharacterized protein	1.95627
Cc00_g07460	GSCOC_T00008321001	Acyl- -binding	1.95606
Cc06_g12500	GSCOC_T00041530001	TIFY 10A	1.95603
Cc00_g11540	GSCOC_T00003163001	disease resistance RGA1	1.95593
Cc11_g11030	GSCOC_T00032492001	Uncharacterized RING finger	1.95116
Cc02_g33000	GSCOC_T00016736001	Late blight resistance R1-A	1.94861
Cc08_g04140	GSCOC_T00034223001	disease resistance RGA1	1.9477
Cc08_g07450	GSCOC_T00025373001	Premnaspirodiene oxygenase	1.94571
Cc11_g09360	GSCOC_T00032744001	E3 ubiquitin- ligase RNF181 homolog	1.94493
Cc06_g18560	GSCOC_T00040477001	Pentatricopeptide repeat-containing chloroplastic	1.94355
Cc10_g11570	GSCOC_T00001425001	disease resistance At4g19050	1.94283
Cc03_g00720	GSCOC_T00025665001	Probable ubiquitin-conjugating enzyme E2 24	1.94282
Cc00_g01730	GSCOC_T00002831001	Uncharacterized mitochondrial g00910	1.94127
Cc06_g13130	GSCOC_T00041441001	Probable receptor-like serine threonine- kinase At5g57670	1.94102
Cc08_g14390	GSCOC_T00030228001	Remorin	1.93683
Cc01_g13330	GSCOC_T00028298001	Uncharacterized protein	1.93461
Cc10_g08330	GSCOC_T00034401001	Rhamnogalacturonate lyase	1.93346
Cc00_g20800	GSCOC_T00001159001	DETOXIFICATION 41	1.93297
Cc08_g13970	GSCOC_T00030280001	Ethylene-responsive transcription factor ERF025	1.9318
Cc01_g10390	GSCOC_T00024134001	Uncharacterized protein	1.93178
Cc10_g15450	GSCOC_T00033725001	Uncharacterized protein	1.92941
Cc10_g14330	GSCOC_T00012024001	Uncharacterized protein	1.92815
Cc11_g11880	GSCOC_T00032386001	Uncharacterized protein	1.92673
Cc05_g05930	GSCOC_T00035180001	Cyclin-D6-1	1.92427
Cc11_g03260	GSCOC_T00025442001	Transcription factor bHLH111	1.92297
Cc08_g07010	GSCOC_T00025295001	Patatin group A-3	1.92154
Cc02_g27360	GSCOC_T00025066001	30S ribosomal chloroplastic	1.92069
Cc08_g07870	GSCOC_T00011882001	B3 domain-containing Os03g0622100	1.91772
Cc01_g14170	GSCOC_T00028412001	Vacuolar cation proton exchanger 3	1.91686
Cc08_g01070	GSCOC_T00038433001	Uncharacterized protein	1.91424
Cc02_g07170	GSCOC_T00009484001	UDP-glycosyltransferase 85A2	1.9142
Cc00_g12160	GSCOC_T00012514001	Caffeic acid 3-O-methyltransferase	1.91202
Cc01_g08040	GSCOC_T00015491001	Late blight resistance R1-A	1.91131
Cc02_g13880	GSCOC_T00029083001	Uncharacterized protein	1.90872
Cc03_g09550	GSCOC_T00030937001	late blight resistance homolog R1B-16	1.90691
Cc07_g05790	GSCOC_T00039860001	Peptidyl-prolyl cis-trans isomerase CYP40	1.9061
Cc05_g07400	GSCOC_T00042268001	DNA excision repair ERCC-6-like 2	1.90411
Cc02_g08880	GSCOC_T00029736001	Uncharacterized protein	1.90273
Cc06_g16270	GSCOC_T00030716001	Polygalacturonase inhibitor	1.9018
Cc01_g15760	GSCOC_T00016523001	isoforms D E	1.90098
Cc00_g12050	GSCOC_T00011734001	GEM 4	1.90049
Cc00_g24720	GSCOC_T00004719001	Monomethylxanthine methyltransferase 1	1.89923
Cc03_g09650	GSCOC_T00030951001	Auxin-induced in root cultures 12	1.89832
Cc01_g04080	GSCOC_T00039275001	Long-chain-fatty-acid--AMP ligase 28	1.89821
Cc05_g05790	GSCOC_T00035160001	UDP-glucose flavonoid 3-O-glucosyltransferase 6	1.89728
Cc04_g15100	GSCOC_T00002593001	Galactoside 2-alpha-L-fucosyltransferase	1.89702
Cc02_g34450	GSCOC_T00000690001	Pentatricopeptide repeat-containing mitochondrial	1.89688
Cc04_g15990	GSCOC_T00042389001	HIPL2	1.89604
Cc01_g07410	GSCOC_T00030177001	Alcohol dehydrogenase-like 7	1.89535
Cc04_g14540	GSCOC_T00040698001	L-type lectin-domain containing receptor kinase	1.8947
Cc02_g14610	GSCOC_T00013877001	Phospholipase A1-IIgamma	1.89293
Cc03_g01070	GSCOC_T00025710001	Beta-D-xylosidase 1	1.89167
Cc01_g14620	GSCOC_T00028468001	Inactive receptor-like serine threonine- kinase At2g40270	1.89157
Cc06_g12230	GSCOC_T00041563001	Subtilisin-like protease	1.89122
Cc00_g36030	GSCOC_T00011613001	Disease resistance RPM1	1.8901
Cc06_g08220	GSCOC_T00031159001	LURP-one-related 12	1.8887
Cc01_g10710	GSCOC_T00024177001	(R)-specific enoyl- hydratase	1.8883
Cc11_g00560	GSCOC_T00004213001	F-box kelch-repeat At3g06240	1.8881
Cc09_g00530	GSCOC_T00017935001	Uncharacterized protein	1.88642
Cc08_g16900	GSCOC_T00035666001	NAC domain-containing 43	1.8863
Cc10_g07860	GSCOC_T00034472001	Endo-	1.88316
Cc09_g01430	GSCOC_T00017812001	WRKY transcription factor 6	1.88311
Cc06_g06120	GSCOC_T00006893001	Lysosomal beta glucosidase	1.88219
Cc02_g21420	GSCOC_T00014783001	Metacaspase-1	1.88009
Cc11_g01260	GSCOC_T00019603001	Serine threonine- kinase SAPK2	1.87927
Cc00_g30650	GSCOC_T00009518001	disease resistance RGA3	1.87883
Cc11_g09430	GSCOC_T00032726001	late blight resistance homolog R1A-6	1.87851
Cc08_g03220	GSCOC_T00037839001	Uncharacterized protein	1.87813
Cc00_g00560	GSCOC_T00036146001	LEAF RUST 10 DISEASE-RESISTANCE LOCUS RECEPTOR-LIKE PROTEIN KINASE-like	1.87737
Cc05_g15490	GSCOC_T00038686001	Uncharacterized protein	1.87733
Cc11_g07840	GSCOC_T00032958001	Probable LRR receptor-like serine threonine- kinase At3g47570	1.87608
Cc02_g05830	GSCOC_T00039103001	Cation H(+) antiporter 3	1.87607
Cc06_g07860	GSCOC_T00031204001	Extended synaptotagmin-3	1.87464
Cc07_g19280	GSCOC_T00018612001	Uncharacterized protein	1.87359
Cc06_g10530	GSCOC_T00041766001	Hexokinase-2	1.87089
Cc05_g04740	GSCOC_T00035009001	Aromatic-L-amino-acid decarboxylase	1.86872
Cc02_g12850	GSCOC_T00029229001	Polyphenol chloroplastic	1.86871
Cc05_g13660	GSCOC_T00021034001	Glycine-rich RNA-binding 8	1.86804
Cc01_g19080	GSCOC_T00016105001	Chlorophyllase-1	1.86759
Cc05_g13390	GSCOC_T00021069001	Uncharacterized protein	1.86736
Cc00_g06510	GSCOC_T00005825001	Xyloglucan endotransglucosylase hydrolase 15	1.86505
Cc05_g00830	GSCOC_T00013176001	Auxin transporter 2	1.86465
Cc04_g13860	GSCOC_T00035901001	Metal tolerance A2	1.86448
Cc02_g19580	GSCOC_T00014526001	Zinc finger SWIM domain-containing 7	1.86397
Cc02_g20260	GSCOC_T00014634001	Probable xyloglucan endotransglucosylase hydrolase 10	1.8636
Cc02_g05870	GSCOC_T00039107001	Arogenate dehydrogenase chloroplastic	1.86342
Cc02_g13180	GSCOC_T00029189001	Uncharacterized protein	1.86232
Cc07_g14450	GSCOC_T00036613001	Uncharacterized protein	1.85848
Cc05_g03310	GSCOC_T00033540001	Proline-rich receptor kinase PERK8	1.85582
Cc07_g20550	GSCOC_T00015722001	Uncharacterized protein	1.85451
Cc02_g26540	GSCOC_T00024951001	disease resistance At3g14460	1.85352
Cc02_g26030	GSCOC_T00028664001	Ent-kaurenoic acid oxidase 1	1.85275
Cc09_g05770	GSCOC_T00033420001	Subtilisin-like protease	1.8527
Cc11_g08190	GSCOC_T00032909001	Pectinesterase 2	1.85233
Cc00_g31960	GSCOC_T00012136001	COBRA 4	1.85158
Cc11_g06650	GSCOC_T00020689001	L-gulonolactone oxidase	1.8515
Cc07_g12970	GSCOC_T00036807001	Uncharacterized protein	1.8479
Cc02_g00760	GSCOC_T00019870001	Caffeic acid 3-O-methyltransferase	1.84766
Cc11_g02470	GSCOC_T00018501001	late blight resistance homolog R1B-14	1.84596
Cc03_g04880	GSCOC_T00026219001	Uncharacterized protein	1.84444
Cc11_g13890	GSCOC_T00032127001	Uncharacterized protein	1.84365
Cc01_g07510	GSCOC_T00009389001	Late blight resistance R1-A	1.84246
Cc10_g12260	GSCOC_T00031924001	Beta-galactosidase 16	1.84082
Cc06_g00850	GSCOC_T00023286001	Uncharacterized protein	1.84034
Cc00_g25340	GSCOC_T00013705001	late blight resistance homolog R1A-6	1.84012
Cc10_g05090	GSCOC_T00034855001	Serine carboxypeptidase-like 18	1.83983
Cc06_g03600	GSCOC_T00023646001	Probable beta-	1.8384
Cc07_g16570	GSCOC_T00037545001	Probable WRKY transcription factor 12	1.83707
Cc01_g00550	GSCOC_T00011035001	Disease resistance RGA2	1.8351
Cc04_g05650	GSCOC_T00022328001	Uncharacterized protein C1450.15	1.83373
Cc11_g09520	GSCOC_T00032709001	Uncharacterized protein	1.83303
Cc06_g05620	GSCOC_T00043121001	Probable purple acid phosphatase 20	1.83214
Cc11_g09770	GSCOC_T00032673001	Probable phosphatase 2C 15	1.83121
Cc00_g20920	GSCOC_T00001074001	Thymidine kinase	1.83098
Cc02_g30610	GSCOC_T00023793001	GDP-mannose	1.82826
Cc10_g13910	GSCOC_T00035222001	Probable serine threonine- kinase CST	1.82819
Cc01_g01780	GSCOC_T00037849001	ALWAYS EARLY 3	1.82719
Cc02_g21400	GSCOC_T00014781001	Metacaspase-1	1.82598
Cc06_g03920	GSCOC_T00023692001	Uncharacterized protein	1.8219
Cc10_g05110	GSCOC_T00034853001	Serine carboxypeptidase-like 18	1.8188
Cc08_g01760	GSCOC_T00038338001	invertase inhibitor	1.81533
Cc09_g06960	GSCOC_T00036341001	Theobromine synthase 2	1.81514
Cc10_g02820	GSCOC_T00024791001	Probable serine threonine- kinase DDB_G0272282	1.81317
Cc10_g10350	GSCOC_T00031425001	Wall-associated receptor kinase 5	1.8109
Cc02_g00660	GSCOC_T00019856001	UNC93 2	1.80928
Cc01_g09110	GSCOC_T00023955001	Glucan endo-	1.80907
Cc01_g01220	GSCOC_T00037961001	Uncharacterized protein	1.80848
Cc06_g18760	GSCOC_T00028904001	methyltransferase DDB_G0268948	1.80747
Cc11_g08750	GSCOC_T00032830001	late blight resistance homolog R1B-12	1.80515
Cc11_g00830	GSCOC_T00019693001	Trimethylguanosine synthase	1.80247
Cc00_g17240	GSCOC_T00006074001	Premnaspirodiene oxygenase	1.80219
Cc08_g17170	GSCOC_T00035706001	Probable methyltransferase PMT18	1.80118
Cc07_g13770	GSCOC_T00036698001	Uncharacterized protein	1.79884
Cc09_g10000	GSCOC_T00041102001	Uncharacterized protein	1.79871
Cc06_g21960	GSCOC_T00015610001	NLP7	1.79768
Cc06_g20560	GSCOC_T00022999001	Uncharacterized protein	1.79712
Cc02_g25530	GSCOC_T00028736001	Pentatricopeptide repeat-containing At5g01110	1.7965
Cc08_g12550	GSCOC_T00030466001	Small heat shock chloroplastic	1.79517
Cc06_g02120	GSCOC_T00023455001	Uncharacterized protein	1.79113
Cc07_g10340	GSCOC_T00037129001	MDIS1-interacting receptor like kinase 2	1.79065
Cc08_g11200	GSCOC_T00027115001	Serine threonine- kinase SAPK3	1.78939
Cc07_g20520	GSCOC_T00015719001	Uncharacterized protein	1.78889
Cc05_g03650	GSCOC_T00017360001	Allene oxide chloroplastic	1.78858
Cc11_g01190	GSCOC_T00019613001	Uncharacterized protein	1.78839
Cc05_g03450	GSCOC_T00033559001	Uncharacterized protein RSN1	1.78727
Cc02_g16310	GSCOC_T00014113001	Actin-depolymerizing factor 5	1.78697
Cc02_g21390	GSCOC_T00014780001	Metacaspase-3	1.78614
Cc04_g04950	GSCOC_T00022234001	Zinc finger 3	1.78596
Cc07_g06870	GSCOC_T00040013001	Peroxidase 73	1.78577
Cc09_g00760	GSCOC_T00017907001	Auxin-induced in root cultures 12	1.78478
Cc00_g19960	GSCOC_T00003849001	Uncharacterized protein	1.78313
Cc08_g08860	GSCOC_T00017220001	BURP domain RD22	1.78294
Cc09_g10530	GSCOC_T00041034001	Expansin-like A1	1.78263
Cc00_g33020	GSCOC_T00002366001	Disease resistance RPM1	1.78064
Cc02_g12440	GSCOC_T00029283001	F-box At1g61340	1.7801
Cc02_g18350	GSCOC_T00014376001	Uncharacterized protein	1.77988
Cc02_g19810	GSCOC_T00014556001	Probable beta-D-xylosidase 5	1.77929
Cc03_g07770	GSCOC_T00026641001	Uncharacterized protein	1.77854
Cc06_g12250	GSCOC_T00041561001	LURP-one-related 16	1.77603
Cc10_g07820	GSCOC_T00034476001	Branched-chain-amino-acid aminotransferase chloroplastic	1.77548
Cc01_g09560	GSCOC_T00024016001	kinase G11A	1.7744
Cc06_g07730	GSCOC_T00031223001	SRG1	1.77337
Cc07_g00460	GSCOC_T00019117001	Glyceraldehyde-3-phosphate cytosolic	1.77235
Cc02_g17940	GSCOC_T00014325001	DETOXIFICATION 41	1.7713
Cc06_g19900	GSCOC_T00022873001	Glucose 1-dehydrogenase B	1.76939
Cc01_g01230	GSCOC_T00037960001	Uncharacterized protein	1.76817
Cc00_g12020	GSCOC_T00000028001	Uncharacterized protein	1.76749
Cc05_g11510	GSCOC_T00021307001	Homogentisate	1.76716
Cc02_g03190	GSCOC_T00020192001	Uncharacterized protein	1.76699
Cc03_g06790	GSCOC_T00026499001	7-hydroxymethyl chlorophyll a chloroplastic	1.76597
Cc11_g08170	GSCOC_T00032911001	21 kDa	1.76475
Cc00_g27910	GSCOC_T00004299001	LRR receptor-like serine threonine- kinase FLS2	1.76473
Cc02_g06330	GSCOC_T00039160001	Uncharacterized protein	1.76365
Cc10_g04910	GSCOC_T00034877001	Probable carbohydrate esterase At4g34215	1.76303
Cc11_g05330	GSCOC_T00020479001	Flavonol 7-O-beta-glucosyltransferase UGT74F1	1.76301
Cc06_g10680	GSCOC_T00041748001	Uncharacterized protein	1.76265
Cc00_g27360	GSCOC_T00009990001	Uncharacterized protein	1.76231
Cc03_g01110	GSCOC_T00025714001	Uncharacterized protein	1.76224
Cc09_g00420	GSCOC_T00017952001	Oligopeptide transporter 3	1.76215
Cc11_g15190	GSCOC_T00038024001	Probable nucleoredoxin 1	1.76136
Cc04_g12630	GSCOC_T00012776001	Disease susceptibility LOV1	1.76101
Cc11_g11260	GSCOC_T00032469001	Uncharacterized protein	1.76061
Cc07_g20360	GSCOC_T00015681001	Reticuline oxidase	1.76035
Cc11_g16050	GSCOC_T00038134001	Endoglucanase E1	1.76015
Cc07_g03260	GSCOC_T00039550001	Tubulin alpha chain	1.75977
Cc11_g08960	GSCOC_T00032805001	COBRA 7	1.7595
Cc01_g09750	GSCOC_T00024041001	Uncharacterized protein	1.75804
Cc05_g04910	GSCOC_T00035035001	Uncharacterized protein	1.75785
Cc01_g00610	GSCOC_T00011045001	disease resistance RGA4	1.75783
Cc00_g05530	GSCOC_T00006861001	SRG1	1.75647
Cc02_g19540	GSCOC_T00014522001	Uncharacterized protein	1.75614
Cc08_g04510	GSCOC_T00015640001	Uncharacterized protein	1.75603
Cc02_g39490	GSCOC_T00027708001	Ethylene-responsive transcription factor ERF023	1.75589
Cc06_g21520	GSCOC_T00008022001	Uncharacterized protein	1.75529
Cc07_g02770	GSCOC_T00039483001	Probable galacturonosyltransferase-like 10	1.75381
Cc07_g07960	GSCOC_T00040158001	Uncharacterized protein	1.75278
Cc04_g11200	GSCOC_T00037284001	Cytochrome P450 71A1	1.75038
Cc08_g04500	GSCOC_T00015639001	Disease resistance RPM1	1.75003
Cc07_g19100	GSCOC_T00018641001	eIF-2-alpha kinase GCN2	1.74949
Cc02_g10650	GSCOC_T00029506001	Ras-related RABC2a	1.74896
Cc06_g04110	GSCOC_T00023718001	Transcription factor TCP8	1.74844
Cc05_g13160	GSCOC_T00021099001	Kinesin KIN-14N	1.74806
Cc01_g19590	GSCOC_T00016040001	Antifungal ginkbilobin-2	1.74619
Cc06_g04690	GSCOC_T00042987001	Probable pectinesterase 8	1.74577
Cc11_g11320	GSCOC_T00032461001	chloroplastic	1.74411
Cc06_g02660	GSCOC_T00023525001	Uncharacterized protein	1.74344
Cc02_g32420	GSCOC_T00001250001	Histidine-containing phosphotransfer 1	1.74321
Cc02_g07530	GSCOC_T00029924001	Thaumatin	1.74285
Cc01_g02350	GSCOC_T00009719001	disease resistance RGA3	1.74212
Cc01_g00430	GSCOC_T00011017001	disease resistance RGA3	1.7414
Cc00_g14960	GSCOC_T00004039001	Cactin	1.74133
Cc06_g23640	GSCOC_T00040543001	Heavy metal-associated isoprenylated plant 26	1.74015
Cc02_g36050	GSCOC_T00042756001	membrane-bound O-acyltransferase	1.73998
Cc09_g03230	GSCOC_T00017576001	F-box PP2-B10	1.73768
Cc10_g06020	GSCOC_T00034723001	RING-H2 finger ATL3	1.73613
Cc02_g27240	GSCOC_T00025049001	Beta-glucosidase 10	1.73549
Cc04_g07230	GSCOC_T00022533001	Uncharacterized protein	1.73502
Cc02_g09340	GSCOC_T00029665001	Cytosolic sulfotransferase 5	1.73423
Cc06_g21250	GSCOC_T00018121001	Uncharacterized protein	1.73196
Cc06_g20110	GSCOC_T00022914001	UDP-glucose flavonoid 3-O-glucosyltransferase 3	1.73169
Cc07_g15590	GSCOC_T00036457001	L-ascorbate oxidase	1.73096
Cc08_g02020	GSCOC_T00037660001	Disease resistance RPM1	1.72844
Cc00_g09210	GSCOC_T00012301001	Cytochrome P450 71A2	1.72707
Cc02_g36070	GSCOC_T00042754001	Uncharacterized protein	1.72287
Cc04_g12660	GSCOC_T00012781001	Disease resistance RPM1	1.72187
Cc00_g04920	GSCOC_T00005511001	Uncharacterized protein	1.72161
Cc11_g04140	GSCOC_T00034050001	Histidine--tRNA cytoplasmic	1.72161
Cc08_g13900	GSCOC_T00030290001	3-ketoacyl- synthase 4	1.72085
Cc01_g01450	GSCOC_T00037907001	UDP-glycosyltransferase 74F2	1.71671
Cc08_g01840	GSCOC_T00008796001	DNA damage-repair toleration DRT100	1.71614
Cc04_g10080	GSCOC_T00042543001	Malate glyoxysomal	1.71523
Cc00_g31400	GSCOC_T00013472001	Disease resistance RPM1	1.71476
Cc02_g28230	GSCOC_T00025193001	DETOXIFICATION 41	1.71461
Cc01_g10320	GSCOC_T00024120001	RING finger and CHY zinc finger domain-containing 1	1.71345
Cc08_g08800	GSCOC_T00017212001	BURP domain RD22	1.71322
Cc01_g15370	GSCOC_T00016570001	Pathogenesis-related genes transcriptional activator PTI6	1.71229
Cc02_g19100	GSCOC_T00014474001	Cysteine ase RD21A	1.71031
Cc06_g02440	GSCOC_T00023500001	Laccase-17	1.70979
Cc02_g23120	GSCOC_T00014994001	Uncharacterized protein	1.70816
Cc05_g13870	GSCOC_T00021007001	Uncharacterized protein	1.7071
Cc02_g31320	GSCOC_T00027584001	ribosomal- -alanine acetyltransferase	1.70708
Cc10_g09140	GSCOC_T00034291001	Probable serine threonine- kinase At1g54610	1.70629
Cc05_g01120	GSCOC_T00000915001	Uncharacterized protein	1.70592
Cc11_g10790	GSCOC_T00032529001	Nudix hydrolase 1	1.70566
Cc00_g31450	GSCOC_T00002414001	Codeine O-demethylase	1.70473
Cc09_g05520	GSCOC_T00013394001	Uncharacterized protein	1.70391
Cc06_g15120	GSCOC_T00030878001	Uncharacterized protein	1.70229
Cc02_g00790	GSCOC_T00019875001	E3 ubiquitin- ligase ATL6	1.70178
Cc01_g00600	GSCOC_T00011044001	Uncharacterized protein	1.70016
Cc00_g12270	GSCOC_T00008605001	Transcription factor ICE1	1.69988
Cc00_g15190	GSCOC_T00005655001	Glucan endo-	1.69809
Cc11_g10090	GSCOC_T00032626001	Auxin-induced 5NG4	1.69715
Cc07_g07490	GSCOC_T00040098001	1-aminocyclopropane-1-carboxylate synthase 3	1.6968
Cc06_g21490	GSCOC_T00008017001	Cation calcium exchanger 1	1.69469
Cc11_g09760	GSCOC_T00032675001	Mitochondrial substrate carrier family W	1.6938
Cc00_g07970	GSCOC_T00009230001	Alcohol dehydrogenase-like 6	1.69129
Cc08_g16520	GSCOC_T00035614001	Methyltransferase mitochondrial	1.69127
Cc02_g13680	GSCOC_T00029115001	Ethylene-responsive transcription factor 12	1.68962
Cc00_g25930	GSCOC_T00006248001	Uncharacterized protein	1.68698
Cc08_g02920	GSCOC_T00037793001	Uncharacterized protein	1.68675
Cc08_g15340	GSCOC_T00035463001	LURP-one-related 17	1.68554
Cc02_g14230	GSCOC_T00013829001	Rac-like GTP-binding RAC13	1.68104
Cc09_g00440	GSCOC_T00017950001	Uncharacterized protein	1.68076
Cc01_g06750	GSCOC_T00030074001	SNF1-related kinase regulatory subunit beta-1	1.67901
Cc00_g32410	GSCOC_T00006083001	SRG1	1.67865
Cc04_g01230	GSCOC_T00021762001	Cytochrome P450 76C2	1.67795
Cc03_g03600	GSCOC_T00026053001	Uncharacterized protein C24B11.05	1.67678
Cc06_g10360	GSCOC_T00041789001	Probable RNA-dependent RNA polymerase 5	1.67653
Cc03_g06180	GSCOC_T00026399001	Uncharacterized protein	1.67499
Cc00_g20110	GSCOC_T00006215001	Uncharacterized protein	1.67401
Cc02_g15030	GSCOC_T00013933001	Uncharacterized protein	1.67378
Cc08_g06890	GSCOC_T00025236001	Cytosolic sulfotransferase 15	1.67372
Cc02_g01730	GSCOC_T00020003001	LEAF RUST 10 DISEASE-RESISTANCE LOCUS RECEPTOR-LIKE PROTEIN KINASE-like	1.67291
Cc05_g02350	GSCOC_T00001634001	UDP-glucose flavonoid 3-O-glucosyltransferase 6	1.67201
Cc00_g12190	GSCOC_T00012517001	Elicitor-responsive 3	1.67183
Cc01_g01670	GSCOC_T00037865001	disease resistance RGA4	1.6698
Cc09_g05760	GSCOC_T00033421001	50S ribosomal L7 L12	1.6686
Cc03_g05540	GSCOC_T00026311001	Uncharacterized protein	1.66752
Cc04_g14860	GSCOC_T00040769001	Probable LRR receptor-like serine threonine- kinase At1g74360	1.66727
Cc04_g14640	GSCOC_T00040722001	L-type lectin-domain containing receptor kinase	1.66614
Cc00_g23980	GSCOC_T00010601001	Pentatricopeptide repeat-containing mitochondrial	1.66383
Cc02_g37590	GSCOC_T00027968001	Uncharacterized protein	1.6619
Cc01_g13920	GSCOC_T00028374001	Uncharacterized protein	1.66064
Cc00_g16040	GSCOC_T00009617001	Uncharacterized protein	1.65937
Cc10_g09090	GSCOC_T00034298001	MDIS1-interacting receptor like kinase 2	1.65867
Cc10_g15580	GSCOC_T00033745001	Uncharacterized protein	1.65721
Cc01_g16040	GSCOC_T00016489001	Glycine oxidase	1.65713
Cc00_g05710	GSCOC_T00006257001	Dihydropyrimidinase	1.65598
Cc04_g13760	GSCOC_T00035881001	Probable serine threonine- kinase CST	1.65585
Cc09_g04880	GSCOC_T00007056001	Vacuolar-sorting receptor 6	1.65539
Cc04_g16550	GSCOC_T00035760001	GDSL esterase lipase At1g74460	1.65534
Cc11_g01870	GSCOC_T00019498001	Acyl- thioesterase 1 homolog 1	1.65493
Cc06_g23560	GSCOC_T00040553001	Organic cation carnitine transporter 7	1.65413
Cc02_g04160	GSCOC_T00020319001	NAC domain-containing 7	1.65363
Cc07_g14100	GSCOC_T00036656001	Magnesium-dependent phosphatase 1	1.65256
Cc07_g07900	GSCOC_T00040152001	Nodulation receptor kinase	1.65231
Cc06_g13760	GSCOC_T00041350001	Glutamate receptor	1.65008
Cc05_g08800	GSCOC_T00016912001	Secologanin synthase	1.64981
Cc11_g12580	GSCOC_T00032297001	Uncharacterized protein	1.64906
Cc08_g14870	GSCOC_T00035398001	Short-chain dehydrogenase TIC chloroplastic	1.64828
Cc05_g15260	GSCOC_T00038712001	E3 ubiquitin- ligase At4g11680	1.64611
Cc09_g08340	GSCOC_T00020786001	Uncharacterized protein	1.64601
Cc11_g16830	GSCOC_T00038230001	65-kDa microtubule-associated 8	1.64536
Cc01_g10080	GSCOC_T00024088001	Lysosomal Pro-X carboxypeptidase	1.6442
Cc00_g29760	GSCOC_T00007169001	NLP7	1.64401
Cc01_g08580	GSCOC_T00023887001	syntaxin-24	1.64323
Cc02_g09840	GSCOC_T00029602001	Hippocampus abundant transcript 1	1.64322
Cc04_g12650	GSCOC_T00012779001	Disease resistance RPP13	1.63932
Cc00_g32210	GSCOC_T00006454001	Disease resistance At4g27190	1.63858
Cc07_g12640	GSCOC_T00036848001	Uncharacterized protein	1.63694
Cc02_g21880	GSCOC_T00014838001	Uncharacterized protein	1.63576
Cc00_g08280	GSCOC_T00003342001	Disease resistance RPM1	1.63488
Cc07_g13370	GSCOC_T00036751001	ODORANT1	1.63464
Cc06_g14800	GSCOC_T00030919001	UPF0057 membrane At2g24040	1.63273
Cc01_g19130	GSCOC_T00016099001	Sulfate transporter	1.63251
Cc00_g12600	GSCOC_T00008307001	Probable ornithine aminotransferase	1.63219
Cc02_g12640	GSCOC_T00029258001	Uncharacterized protein	1.63132
Cc03_g09300	GSCOC_T00042688001	UDP-glycosyltransferase 75D1	1.63035
Cc04_g12040	GSCOC_T00005246001	Receptor kinase TMK1	1.62996
Cc09_g00710	GSCOC_T00017912001	Auxin-induced in root cultures 12	1.62976
Cc08_g05920	GSCOC_T00024390001	Abscisic acid 8 -hydroxylase 1	1.62953
Cc03_g06860	GSCOC_T00026510001	Auxin-induced in root cultures 12	1.62787
Cc05_g08480	GSCOC_T00016870001	Peroxidase 4	1.62773
Cc04_g11910	GSCOC_T00037403001	F-box kelch-repeat At3g06240	1.62504
Cc01_g14910	GSCOC_T00028512001	Cation H(+) antiporter 15	1.62382
Cc02_g36130	GSCOC_T00006317001	Auxin-induced PCNT115	1.62362
Cc00_g06230	GSCOC_T00010068001	L-idonate 5-dehydrogenase	1.62245
Cc08_g11770	GSCOC_T00027188001	Uncharacterized protein	1.6222
Cc02_g25240	GSCOC_T00028775001	Uncharacterized protein	1.62102
Cc01_g20380	GSCOC_T00015940001	Glutaredoxin-C11	1.62061
Cc10_g08430	GSCOC_T00034390001	UDP-N-acetylglucosamine--peptide N-acetylglucosaminyltransferase 110 kDa subunit	1.61932
Cc00_g14300	GSCOC_T00010613001	Basic endochitinase	1.61797
Cc11_g14490	GSCOC_T00032052001	Potassium transporter 6	1.61692
Cc11_g05610	GSCOC_T00020521001	NAD(P)H-dependent 6 -deoxychalcone synthase	1.61689
Cc07_g00910	GSCOC_T00019173001	Uncharacterized protein	1.61656
Cc01_g21330	GSCOC_T00004992001	Uncharacterized protein	1.61624
Cc06_g12930	GSCOC_T00041471001	Uncharacterized protein	1.61606
Cc01_g07320	GSCOC_T00030165001	F-box kelch-repeat At5g26960	1.61581
Cc06_g08780	GSCOC_T00031087001	Uncharacterized protein	1.61492
Cc08_g12450	GSCOC_T00030480001	Uncharacterized protein	1.61457
Cc06_g17620	GSCOC_T00040344001	Ribosomal RNA-processing 12	1.61391
Cc08_g10420	GSCOC_T00027009001	Uncharacterized protein	1.61358
Cc11_g07490	GSCOC_T00018048001	Leucine-rich repeat receptor kinase EMS1	1.61176
Cc11_g05820	GSCOC_T00020553001	Purple acid phosphatase 3	1.61152
Cc11_g01810	GSCOC_T00019509001	Pentatricopeptide repeat-containing mitochondrial	1.60812
Cc02_g39350	GSCOC_T00027728001	Uncharacterized protein	1.60783
Cc00_g34610	GSCOC_T00013454001	Glyoxylate reductase	1.60741
Cc08_g03710	GSCOC_T00034157001	Disease resistance RPM1	1.6071
Cc05_g07920	GSCOC_T00016796001	Uncharacterized protein	1.60671
Cc06_g19970	GSCOC_T00022886001	SWI SNF-related matrix-associated actin-dependent regulator of chromatin subfamily A member 3-like 1	1.60649
Cc07_g10520	GSCOC_T00037105001	NAC domain-containing 7	1.60645
Cc03_g05030	GSCOC_T00026240001	Cellulose synthase G1	1.60639
Cc01_g11880	GSCOC_T00028104001	Uncharacterized protein YKR070W	1.60572
Cc00_g19490	GSCOC_T00003022001	Uncharacterized protein	1.60487
Cc06_g17610	GSCOC_T00040343001	RRP12	1.60103
Cc06_g14280	GSCOC_T00041277001	S-adenosylmethionine decarboxylase proenzyme	1.60073
Cc02_g35540	GSCOC_T00042833001	Zinc finger CCCH domain-containing 3	1.59945
Cc01_g00750	GSCOC_T00011069001	Cytokinin riboside 5 -monophosphate phosphoribohydrolase LOG8	1.5994
Cc08_g09250	GSCOC_T00017270001	Bark storage A	1.59635
Cc03_g10100	GSCOC_T00031012001	Major allergen Pru ar 1	1.59492
Cc02_g33390	GSCOC_T00015368001	Mannosylglyco endo-beta-mannosidase	1.59485
Cc05_g00390	GSCOC_T00017072001	DETOXIFICATION 41	1.59452
Cc01_g10810	GSCOC_T00024188001	Receptor 12	1.59377
Cc01_g05090	GSCOC_T00028595001	Probable serine threonine- kinase WNK4	1.59346
Cc11_g07070	GSCOC_T00018111001	mitochondrial	1.59331
Cc00_g18970	GSCOC_T00003156001	LEAF RUST 10 DISEASE-RESISTANCE LOCUS RECEPTOR-LIKE PROTEIN KINASE-like	1.59257
Cc01_g15410	GSCOC_T00016563001	Root phototropism 2	1.5924
Cc07_g19090	GSCOC_T00018642001	ATP-dependent DNA helicase Q-like 4B	1.58775
Cc10_g07540	GSCOC_T00034509001	Probable glucan	1.58724
Cc05_g16580	GSCOC_T00038542001	Uncharacterized protein	1.58711
Cc08_g12970	GSCOC_T00030405001	NAC domain-containing 7	1.5869
Cc07_g13290	GSCOC_T00036762001	Glutamine synthetase cytosolic isozyme 1	1.58528
Cc02_g18210	GSCOC_T00014358001	Uncharacterized protein	1.58349
Cc03_g05220	GSCOC_T00026270001	1-aminocyclopropane-1-carboxylate oxidase homolog	1.57959
Cc06_g21680	GSCOC_T00015560001	cadmium zinc-transporting ATPase HMA4	1.57956
Cc05_g00780	GSCOC_T00013169001	Acidic endochitinase	1.5793
Cc02_g37580	GSCOC_T00027969001	Phosphomannomutase	1.57896
Cc03_g15450	GSCOC_T00026825001	Disease resistance RGA2	1.57787
Cc02_g04950	GSCOC_T00038987001	Pentatricopeptide repeat-containing chloroplastic	1.57694
Cc11_g01890	GSCOC_T00019496001	lin-54 homolog	1.57534
Cc09_g04560	GSCOC_T00017411001	Endoglucanase 24	1.57444
Cc02_g17690	GSCOC_T00014291001	Organ-specific P4	1.57428
Cc03_g08480	GSCOC_T00033269001	Serine hydroxymethyltransferase 2	1.57352
Cc06_g23290	GSCOC_T00040593001	Uncharacterized protein	1.57298
Cc02_g16400	GSCOC_T00014125001	Glycine-rich 2	1.57272
Cc01_g16550	GSCOC_T00016428001	Uncharacterized protein	1.57218
Cc09_g03480	GSCOC_T00017544001	Auxin efflux carrier component 5	1.57122
Cc02_g21830	GSCOC_T00014831001	Beta-xylosidase alpha-L-arabinofuranosidase 2	1.56996
Cc08_g04540	GSCOC_T00015645001	Uncharacterized protein	1.56984
Cc00_g00420	GSCOC_T00036127001	Arginine decarboxylase	1.56984
Cc01_g12950	GSCOC_T00028252001	SUPPRESSOR OF GENE SILENCING 3 homolog	1.56962
Cc11_g15820	GSCOC_T00038104001	Uncharacterized protein	1.56902
Cc00_g16650	GSCOC_T00009359001	Transcription factor bHLH35	1.56759
Cc08_g08150	GSCOC_T00007257001	Potassium channel KAT3	1.56713
Cc04_g11980	GSCOC_T00037414001	late blight resistance homolog R1A-6	1.56588
Cc00_g02350	GSCOC_T00012209001	Uncharacterized protein	1.56469
Cc06_g17660	GSCOC_T00040349001	Heat stress transcription factor B-3	1.56451
Cc09_g08330	GSCOC_T00020783001	Uncharacterized protein	1.5644
Cc01_g03720	GSCOC_T00033054001	Auxin-binding T85	1.56327
Cc03_g08490	GSCOC_T00033270001	Adenosylhomocysteinase	1.56257
Cc02_g32340	GSCOC_T00012969001	Uncharacterized protein	1.56198
Cc02_g07820	GSCOC_T00029889001	DNA replication complex GINS PSF2	1.5619
Cc06_g18280	GSCOC_T00040435001	Glucan endo-	1.55829
Cc08_g13370	GSCOC_T00030352001	Uncharacterized protein At4g22758	1.55763
Cc11_g10950	GSCOC_T00032505001	Uncharacterized protein	1.55716
Cc02_g28460	GSCOC_T00009426001	Pentatricopeptide repeat-containing At1g09900	1.55648
Cc03_g10410	GSCOC_T00031057001	late blight resistance homolog R1B-17	1.55579
Cc02_g33470	GSCOC_T00015377001	Cyclin-P3-1	1.55486
Cc03_g03510	GSCOC_T00026041001	Long chain acyl- synthetase peroxisomal	1.55448
Cc00_g26700	GSCOC_T00003035001	disease resistance RGA3	1.55443
Cc01_g07720	GSCOC_T00015445001	U5 small nuclear ribonucleo 200 kDa helicase	1.55219
Cc00_g27600	GSCOC_T00000391001	late blight resistance homolog R1B-14	1.5521
Cc11_g12860	GSCOC_T00032256001	Probable calcium-binding CML46	1.55207
Cc02_g37030	GSCOC_T00028045001	Subtilisin-like protease	1.55202
Cc07_g09960	GSCOC_T00037177001	Probable mitochondrial chaperone bcs1	1.55081
Cc11_g13690	GSCOC_T00032150001	Tetratricopeptide repeat 38	1.55011
Cc06_g00490	GSCOC_T00023228001	Probable serine threonine- kinase WNK5	1.54637
Cc11_g13310	GSCOC_T00032199001	Homeobox-leucine zipper ATHB-13	1.54471
Cc00_g12830	GSCOC_T00008934001	ABC transporter B family member 9	1.5434
Cc02_g04140	GSCOC_T00020317001	21 kDa	1.54191
Cc03_g11020	GSCOC_T00042054001	Kirola	1.54166
Cc03_g09960	GSCOC_T00030989001	NADPH-dependent alkenal one chloroplastic	1.53886
Cc05_g12860	GSCOC_T00021133001	G-type lectin S-receptor-like serine threonine- kinase At4g27290	1.53879
Cc05_g01940	GSCOC_T00040844001	UDP-glucose flavonoid 3-O-glucosyltransferase 6	1.53767
Cc00_g03380	GSCOC_T00012859001	Uncharacterized protein	1.53668
Cc09_g01610	GSCOC_T00017786001	Uncharacterized protein	1.53654
Cc06_g07710	GSCOC_T00031225001	Heparanase 3	1.53641
Cc00_g23350	GSCOC_T00012066001	O-acyltransferase WSD1	1.53535
Cc06_g14670	GSCOC_T00041225001	Peroxisome biogenesis 12	1.53337
Cc00_g27090	GSCOC_T00008172001	disease resistance RPP13 1	1.5328
Cc06_g08610	GSCOC_T00031108001	Signal peptidase complex catalytic subunit SEC11C	1.53162
Cc07_g10170	GSCOC_T00037152001	3-epi-6-deoxocathasterone 23-monooxygenase CYP90C1	1.53139
Cc03_g15130	GSCOC_T00026773001	UDP-glycosyltransferase 74E2	1.53135
Cc05_g07910	GSCOC_T00016795001	disease resistance RGA3	1.53081
Cc06_g01880	GSCOC_T00023425001	Laccase-7	1.53015
Cc11_g16200	GSCOC_T00038155001	Probable pectate lyase 5	1.52958
Cc10_g06570	GSCOC_T00034637001	E3 ubiquitin- ligase ATL15	1.52789
Cc05_g14850	GSCOC_T00038769001	Meiotic recombination SPO11-1	1.52755
Cc02_g01840	GSCOC_T00020020001	Bidirectional sugar transporter SWEET3	1.52755
Cc00_g33560	GSCOC_T00010573001	40S ribosomal S10-3	1.52729
Cc10_g10510	GSCOC_T00035989001	Serine threonine- kinase mph1	1.52601
Cc03_g04160	GSCOC_T00026125001	Leucine-rich repeat extensin 6	1.52304
Cc07_g09990	GSCOC_T00037173001	Transcription factor bHLH110	1.52199
Cc03_g09840	GSCOC_T00030974001	late blight resistance homolog R1A-3	1.52157
Cc06_g22020	GSCOC_T00015617001	NLP6	1.5215
Cc02_g20620	GSCOC_T00014678001	Oligopeptide transporter 4	1.52004
Cc01_g10300	GSCOC_T00024117001	Aquaporin TIP1-1	1.51939
Cc08_g15560	GSCOC_T00035493001	Cation H(+) antiporter 18	1.51812
Cc07_g00330	GSCOC_T00019101001	Uncharacterized protein	1.51704
Cc00_g05480	GSCOC_T00000307001	Uncharacterized protein	1.51599
Cc02_g13920	GSCOC_T00029079001	GDSL esterase lipase At1g28590	1.51557
Cc05_g07960	GSCOC_T00016801001	GTP-binding homolog	1.51502
Cc03_g11170	GSCOC_T00042076001	Actin-related 2 3 complex subunit 4	1.51307
Cc04_g15170	GSCOC_T00002602001	Pentatricopeptide repeat-containing At5g48910	1.51216
Cc03_g12930	GSCOC_T00030635001	Uncharacterized protein	1.51197
Cc02_g17750	GSCOC_T00014300001	Dehydrodolichyl diphosphate synthase complex subunit NUS1	1.50997
Cc00_g31060	GSCOC_T00006034001	Uncharacterized protein	1.50975
Cc00_g22590	GSCOC_T00003321001	Thebaine 6-O-demethylase	1.50961
Cc02_g17500	GSCOC_T00014268001	Uncharacterized protein	1.50732
Cc05_g04090	GSCOC_T00031589001	Mitogen-activated kinase kinase kinase A	1.5048
Cc04_g00870	GSCOC_T00021714001	GDSL esterase lipase 1	1.50376
Cc01_g07500	GSCOC_T00009390001	GAST1	1.50239
Cc06_g08480	GSCOC_T00031126001	Alpha-amylase isozyme 3E	1.50235
Cc06_g11210	GSCOC_T00041685001	K(+) efflux antiporter 6	1.5013
Cc02_g31470	GSCOC_T00027552001	Vinorine synthase	1.50073
Cc00_g19510	GSCOC_T00007978001	disease resistance RGA3	1.5004
Cc01_g11300	GSCOC_T00024256001	Fasciclin-like arabinogalactan 11	1.49963
Cc08_g11400	GSCOC_T00027141001	Expansin-like B1	1.49925
Cc00_g29640	GSCOC_T00001111001	Disease resistance RPM1	1.49873
Cc09_g08740	GSCOC_T00020853001	Auxin response factor 6	1.49854
Cc04_g01080	GSCOC_T00021740001	TIFY 10B	1.49837
Cc06_g07210	GSCOC_T00031293001	Lysosomal beta glucosidase	1.49831
Cc03_g08210	GSCOC_T00033219001	UPF0481 At3g47200	1.49804
Cc07_g00690	GSCOC_T00019147001	Blue copper	1.4978
Cc03_g10850	GSCOC_T00042017001	Uncharacterized protein	1.49545
Cc04_g15140	GSCOC_T00002597001	Uncharacterized protein	1.49512
Cc10_g04590	GSCOC_T00034917001	Subtilisin-like protease	1.49475
Cc01_g05840	GSCOC_T00027410001	Bidirectional sugar transporter SWEET3b	1.49468
Cc01_g14550	GSCOC_T00028457001	BAG family molecular chaperone regulator 4	1.49348
Cc06_g10600	GSCOC_T00041757001	Uncharacterized protein	1.49274
Cc05_g05350	GSCOC_T00035102001	Uncharacterized protein	1.49034
Cc06_g00260	GSCOC_T00023198001	Probable inactive receptor kinase At3g08680	1.48913
Cc08_g10810	GSCOC_T00027060001	Heat shock factor HSF30	1.48864
Cc00_g02180	GSCOC_T00007909001	Vacuolar-sorting receptor 6	1.48863
Cc07_g08560	GSCOC_T00040234001	Non-specific lipid-transfer 2	1.48757
Cc07_g21290	GSCOC_T00011168001	Fructokinase-2	1.48671
Cc05_g05510	GSCOC_T00035120001	Xyloglucan endotransglucosylase hydrolase 9	1.48578
Cc09_g01730	GSCOC_T00017771001	Uncharacterized protein	1.48556
Cc10_g14270	GSCOC_T00012017001	Pathogen-related	1.48379
Cc08_g05390	GSCOC_T00024301001	nuclease HARBI1	1.48365
Cc07_g19210	GSCOC_T00018623001	Indole-3-acetic acid-induced ARG7	1.48308
Cc00_g05490	GSCOC_T00000308001	late blight resistance homolog R1B-12	1.48295
Cc00_g07980	GSCOC_T00009232001	Transcriptional repressor NF-X1	1.48282
Cc06_g11810	GSCOC_T00041613001	Uncharacterized protein	1.4823
Cc00_g03050	GSCOC_T00003056001	disease resistance RPP13 1	1.48181
Cc00_g31380	GSCOC_T00002540001	Disease resistance RPM1	1.48129
Cc08_g13890	GSCOC_T00030291001	SPX domain-containing membrane At4g22990	1.481
Cc03_g15070	GSCOC_T00026764001	BTB POZ and TAZ domain-containing 3	1.48088
Cc06_g22870	GSCOC_T00040657001	Uncharacterized protein	1.47862
Cc02_g02980	GSCOC_T00020168001	late blight resistance homolog R1B-12	1.47846
Cc03_g03980	GSCOC_T00026099001	Uncharacterized N-acetyltransferase p20	1.47838
Cc03_g09870	GSCOC_T00030977001	Probable aldo-keto reductase 2	1.47793
Cc10_g10230	GSCOC_T00031438001	Probable E3 ubiquitin- ligase ARI2	1.47721
Cc00_g01060	GSCOC_T00015884001	Receptor kinase FERONIA	1.47707
Cc01_g04660	GSCOC_T00015810001	Caffeic acid 3-O-methyltransferase 1	1.4761
Cc01_g21320	GSCOC_T00004993001	Probable beta-D-xylosidase 2	1.47609
Cc03_g04020	GSCOC_T00026105001	Non-specific lipid-transfer At5g64080	1.47572
Cc04_g02240	GSCOC_T00021892001	Uncharacterized protein	1.47408
Cc00_g07410	GSCOC_T00008315001	Probable LRR receptor-like serine threonine- kinase At2g16250	1.47392
Cc04_g08670	GSCOC_T00022738001	Cysteine-rich receptor kinase 10	1.47304
Cc07_g11080	GSCOC_T00037041001	Ubiquitin-conjugating enzyme E2 28	1.47172
Cc09_g04980	GSCOC_T00007068001	Mitochondrial amidoxime reducing component 2	1.4717
Cc04_g10260	GSCOC_T00042569001	Uncharacterized protein	1.47148
Cc00_g25920	GSCOC_T00006245001	Uncharacterized protein	1.47137
Cc02_g31270	GSCOC_T00027591001	Kinesin KIN-14M	1.47134
Cc07_g16100	GSCOC_T00037608001	Probable carboxylesterase 17	1.4705
Cc02_g26330	GSCOC_T00028620001	Uncharacterized protein	1.47036
Cc02_g36450	GSCOC_T00003923001	Cytochrome P450 704C1	1.46965
Cc00_g24370	GSCOC_T00009147001	Disease resistance RPM1	1.46957
Cc04_g03820	GSCOC_T00022090001	Monoglyceride lipase	1.46811
Cc08_g12470	GSCOC_T00030476001	Uncharacterized protein	1.4675
Cc02_g34440	GSCOC_T00000689001	Pentatricopeptide repeat-containing mitochondrial	1.46735
Cc09_g04690	GSCOC_T00017395001	LRR receptor-like serine threonine- kinase GSO1	1.46723
Cc01_g05010	GSCOC_T00028585001	Uncharacterized protein	1.46547
Cc10_g03030	GSCOC_T00024821001	Uncharacterized protein	1.46537
Cc06_g00880	GSCOC_T00023291001	Mitoferrin	1.46504
Cc07_g18940	GSCOC_T00018663001	pentatricopeptide repeat-containing mitochondrial	1.46465
Cc06_g01150	GSCOC_T00023326001	Uncharacterized protein	1.46314
Cc00_g14180	GSCOC_T00009212001	Cytochrome P450 85A1	1.46308
Cc04_g05040	GSCOC_T00022245001	Bifunctional dihydroflavonol 4-reductase flavanone 4-reductase	1.46185
Cc02_g03580	GSCOC_T00020245001	Uncharacterized protein	1.46094
Cc04_g06720	GSCOC_T00022468001	Uncharacterized protein	1.46015
Cc11_g04690	GSCOC_T00042895001	COBRA	1.45832
Cc04_g05160	GSCOC_T00022261001	cyclic nucleotide-gated ion channel 8	1.45779
Cc05_g02900	GSCOC_T00020864001	1-aminocyclopropane-1-carboxylate oxidase 3	1.45772
Cc07_g02210	GSCOC_T00039404001	Nephrocystin-3	1.45572
Cc10_g07420	GSCOC_T00034524001	FBD-associated F-box At5g22730	1.4549
Cc00_g20620	GSCOC_T00012897001	late blight resistance homolog R1B-14	1.45427
Cc02_g29880	GSCOC_T00038900001	disease resistance At3g14460	1.45422
Cc11_g11410	GSCOC_T00032448001	DNA-directed RNA polymerase mitochondrial	1.45421
Cc00_g19650	GSCOC_T00004841001	disease resistance RGA3	1.45376
Cc08_g12160	GSCOC_T00030518001	Dehydration-responsive element-binding 3	1.45233
Cc04_g12370	GSCOC_T00005293001	deoxyribonuclease TATDN1	1.45181
Cc00_g09750	GSCOC_T00013508001	disease resistance RGA4	1.45128
Cc01_g05250	GSCOC_T00011453001	Copia	1.45017
Cc03_g08750	GSCOC_T00033310001	MDIS1-interacting receptor like kinase 2	1.45012
Cc02_g02350	GSCOC_T00020088001	Heat shock 83	1.45002
Cc05_g04010	GSCOC_T00031576001	Premnaspirodiene oxygenase	1.44969
Cc02_g23600	GSCOC_T00015060001	NRT1 PTR FAMILY	1.44902
Cc00_g18750	GSCOC_T00008462001	Receptor-like serine threonine- kinase SD1-7	1.44768
Cc05_g01850	GSCOC_T00015775001	GEM 5	1.4462
Cc06_g19070	GSCOC_T00028956001	Ribosomal RNA small subunit methyltransferase NEP1	1.44584
Cc04_g09880	GSCOC_T00042519001	Heavy metal-associated isoprenylated plant 26	1.4443
Cc02_g08330	GSCOC_T00029808001	Zinc finger ZAT11	1.44427
Cc07_g15870	GSCOC_T00036416001	Cytochrome P450 71A1	1.44233
Cc02_g09680	GSCOC_T00029622001	Bifunctional purine biosynthesis	1.4396
Cc10_g01350	GSCOC_T00024606001	Subtilisin-like protease	1.43833
Cc09_g07460	GSCOC_T00036253001	Reticuline oxidase	1.43785
Cc09_g02810	GSCOC_T00017627001	transcription elongation factor SPT5 homolog 2	1.43747
Cc00_g28020	GSCOC_T00002450001	Serine threonine- kinase BSK8	1.43727
Cc00_g26030	GSCOC_T00004770001	Ribonucleases P MRP subunit POP1	1.43726
Cc01_g10800	GSCOC_T00024187001	Uncharacterized protein	1.43662
Cc00_g10430	GSCOC_T00005154001	Subtilisin-like protease	1.43357
Cc01_g07530	GSCOC_T00009386001	NDR1	1.43245
Cc06_g13830	GSCOC_T00041341001	Probable alph	1.43216
Cc04_g14220	GSCOC_T00035955001	GDSL esterase lipase At5g62930	1.42977
Cc11_g14140	GSCOC_T00032100001	Uncharacterized WD repeat-containing alr3466	1.4296
Cc05_g02110	GSCOC_T00018402001	Ribosomal RNA small subunit methyltransferase NEP1	1.42835
Cc07_g16210	GSCOC_T00037593001	Monothiol glutaredoxin-S2	1.42816
Cc01_g19180	GSCOC_T00016094001	CST complex subunit STN1	1.4278
Cc00_g25080	GSCOC_T00010336001	Gibberellin 3-beta-dioxygenase 4	1.42771
Cc10_g03450	GSCOC_T00024870001	Probable calcium-binding CML41	1.42754
Cc01_g19140	GSCOC_T00016098001	Serine threonine tyrosine- kinase HT1	1.42716
Cc02_g05140	GSCOC_T00039014001	Thioredoxin H-type	1.42712
Cc03_g05950	GSCOC_T00026369001	NRT1 PTR FAMILY	1.42627
Cc00_g01980	GSCOC_T00000823001	Uncharacterized protein	1.42555
Cc07_g14740	GSCOC_T00036573001	Peroxidase 49	1.42326
Cc02_g37570	GSCOC_T00027973001	(+)-neomenthol dehydrogenase	1.4232
Cc03_g02700	GSCOC_T00025935001	Uncharacterized protein	1.42258
Cc01_g10270	GSCOC_T00024112001	Uncharacterized protein	1.42084
Cc00_g27050	GSCOC_T00012722001	F-box SKIP1	1.42067
Cc03_g02460	GSCOC_T00025892001	Superoxide dismutas	1.42018
Cc06_g20410	GSCOC_T00022972001	Disease resistance RPM1	1.41832
Cc06_g02040	GSCOC_T00023444001	Probable glutathione S-transferase	1.41752
Cc10_g00740	GSCOC_T00024532001	Uncharacterized protein	1.41678
Cc00_g07400	GSCOC_T00008312001	Uncharacterized protein	1.41616
Cc10_g13860	GSCOC_T00035227001	Wall-associated receptor kinase 1	1.41416
Cc04_g05250	GSCOC_T00022272001	Heat shock 70 kDa	1.41383
Cc00_g29820	GSCOC_T00013372001	Disease resistance RPM1	1.41368
Cc04_g09130	GSCOC_T00022792001	Zinc finger JACKDAW	1.41338
Cc01_g15710	GSCOC_T00016530001	Adenine DNA glycosylase	1.41333
Cc09_g10080	GSCOC_T00041093001	Uncharacterized protein	1.41179
Cc02_g18150	GSCOC_T00014351001	Myosin heavy chain kinase B	1.41147
Cc02_g05630	GSCOC_T00039076001	LOB domain-containing 15	1.40974
Cc07_g15830	GSCOC_T00036421001	Alanine--glyoxylate aminotransferase 2 homolog mitochondrial	1.40865
Cc00_g10970	GSCOC_T00006920001	Disease resistance RPM1	1.40756
Cc09_g07200	GSCOC_T00036300001	Reticuline oxidase	1.407
Cc00_g05720	GSCOC_T00006259001	Dihydropyrimidinase	1.40543
Cc05_g16180	GSCOC_T00038597001	Post-GPI attachment to s factor 3	1.40522
Cc00_g02860	GSCOC_T00004304001	Probable LRR receptor-like serine threonine- kinase At1g53430	1.40516
Cc06_g12650	GSCOC_T00041510001	Uncharacterized protein	1.40314
Cc07_g09120	GSCOC_T00040308001	Anthocyanidin 3-O-glucosyltransferase 5	1.403
Cc05_g00180	GSCOC_T00017043001	UDP-arabinose 4-epimerase 1	1.40255
Cc06_g07660	GSCOC_T00031235001	F-box LRR-repeat 14	1.40255
Cc11_g14470	GSCOC_T00032055001	Probable alph	1.4023
Cc11_g11460	GSCOC_T00032443001	pentatricopeptide repeat-containing At1g13630	1.40196
Cc00_g32020	GSCOC_T00005233001	Serine carboxypeptidase-like 35	1.40173
Cc02_g01790	GSCOC_T00020014001	Probable trehalose-phosphate phosphatase 2	1.40049
Cc11_g10420	GSCOC_T00032581001	late blight resistance homolog R1A-6	1.4004
Cc00_g35970	GSCOC_T00007523001	Probable LRR receptor-like serine threonine- kinase At2g16250	1.40003
Cc00_g14490	GSCOC_T00012357001	Disease resistance RGA2	1.39912
Cc00_g11900	GSCOC_T00007043001	Multiple C2 and transmembrane domain-containing 1	1.39639
Cc04_g14610	GSCOC_T00040714001	L-type lectin-domain containing receptor kinase	1.39569
Cc03_g07910	GSCOC_T00033170001	PLASMODESMATA CALLOSE-BINDING PROTEIN 1	1.39566
Cc00_g06600	GSCOC_T00005838001	Uncharacterized protein	1.39461
Cc05_g06890	GSCOC_T00042205001	Clathrin light chain 1	1.39418
Cc08_g13010	GSCOC_T00030397001	Vacuolar-processing enzyme	1.39397
Cc06_g20040	GSCOC_T00022900001	Tubulin beta-1 chain	1.39389
Cc06_g09580	GSCOC_T00041895001	Uncharacterized protein	1.39365
Cc04_g02460	GSCOC_T00021918001	Uncharacterized protein	1.39311
Cc03_g01720	GSCOC_T00025794001	UDP-glucuronic acid decarboxylase 1	1.39163
Cc02_g24830	GSCOC_T00028835001	Uncharacterized protein	1.39123
Cc01_g21830	GSCOC_T00004933001	CAJ1	1.39061
Cc04_g01900	GSCOC_T00021853001	Chaperonin CPN60-like mitochondrial	1.39038
Cc02_g30100	GSCOC_T00038963001	Cytokinin dehydrogenase 9	1.38969
Cc06_g11900	GSCOC_T00041602001	Vacuolar sorting-associated 2 homolog 1	1.38817
Cc04_g09080	GSCOC_T00022785001	Transcription factor MYB44	1.38806
Cc01_g16810	GSCOC_T00016397001	pentatricopeptide repeat-containing mitochondrial	1.38439
Cc05_g01020	GSCOC_T00000794001	disease resistance RGA1	1.38263
Cc01_g18920	GSCOC_T00016132001	Uncharacterized protein	1.38199
Cc02_g39920	GSCOC_T00027642001	NAC domain-containing 43	1.38097
Cc06_g13380	GSCOC_T00041407001	Zinc finger 2	1.38028
Cc01_g02310	GSCOC_T00009725001	disease resistance RGA4	1.38012
Cc02_g39990	GSCOC_T00027631001	LHY	1.37924
Cc10_g15440	GSCOC_T00033724001	Phosphoribosylaminoimidazole-succinocarboxamide chloroplastic	1.37878
Cc00_g16710	GSCOC_T00011926001	O-fucosyltransferase 1	1.37743
Cc11_g11380	GSCOC_T00032451001	Peroxiredoxin-like 2A	1.37699
Cc06_g23710	GSCOC_T00040535001	Squamosa promoter-binding 12	1.37625
Cc10_g07730	GSCOC_T00034485001	Vacuolar amino acid transporter 6	1.37606
Cc02_g38120	GSCOC_T00027905001	Aquaporin PIP1-3	1.37513
Cc08_g12990	GSCOC_T00030400001	Probable ATP-dependent RNA helicase DHX37	1.37513
Cc08_g10840	GSCOC_T00027063001	Uncharacterized protein	1.37481
Cc02_g37830	GSCOC_T00027939001	Uncharacterized protein	1.37434
Cc09_g09180	GSCOC_T00023088001	N-acetylneuraminate 9-O-acetyltransferase	1.37398
Cc01_g20470	GSCOC_T00015929001	Uncharacterized protein	1.37148
Cc00_g11250	GSCOC_T00011610001	ABC transporter C family member 2	1.37123
Cc09_g04570	GSCOC_T00017410001	Endoglucanase 24	1.37101
Cc06_g21060	GSCOC_T00034090001	Heavy metal-associated isoprenylated plant 26	1.371
Cc07_g11210	GSCOC_T00037027001	Peroxidase 64	1.36969
Cc02_g06790	GSCOC_T00039229001	Nematode resistance -like HSPRO2	1.36719
Cc02_g07230	GSCOC_T00029971001	Uncharacterized protein	1.36709
Cc02_g12790	GSCOC_T00029236001	S-linalool synthase	1.36704
Cc08_g01380	GSCOC_T00038395001	Nuclear transcription factor Y subunit A-3	1.36667
Cc07_g09160	GSCOC_T00040312001	Serine threonine tyrosine- kinase HT1	1.36521
Cc06_g00370	GSCOC_T00023212001	Uncharacterized protein	1.3651
Cc04_g12540	GSCOC_T00005318001	Cell division cycle 48 homolog	1.36438
Cc07_g09710	GSCOC_T00037206001	Syntaxin-112	1.36226
Cc02_g34520	GSCOC_T00000703001	Probable phosphatase 2C 73	1.36205
Cc01_g10430	GSCOC_T00024139001	Serine carboxypeptidase-like 48	1.36048
Cc09_g02800	GSCOC_T00017628001	transcription elongation factor SPT5 homolog 2	1.36041
Cc01_g10280	GSCOC_T00024113001	Superoxide dismutas	1.36023
Cc11_g14480	GSCOC_T00032053001	Potassium transporter 6	1.36008
Cc06_g22260	GSCOC_T00017180001	F-box CPR1	1.35908
Cc02_g30970	GSCOC_T00023856001	Uncharacterized protein	1.35708
Cc00_g00570	GSCOC_T00036149001	LEAF RUST 10 DISEASE-RESISTANCE LOCUS RECEPTOR-LIKE PROTEIN KINASE-like	1.35694
Cc04_g01850	GSCOC_T00021847001	Beta- insoluble isoenzyme CWINV1	1.35677
Cc03_g12290	GSCOC_T00015239001	Uncharacterized protein	1.35634
Cc00_g05730	GSCOC_T00006262001	Dihydropyrimidinase	1.35597
Cc09_g10120	GSCOC_T00041089001	Subtilisin-like protease	1.35593
Cc06_g21200	GSCOC_T00034059001	Metacaspase-9	1.35581
Cc04_g15180	GSCOC_T00002603001	DNA polymerase III -type	1.3552
Cc07_g12350	GSCOC_T00036885001	10-deacetylbaccatin III 10-O-acetyltransferase	1.35501
Cc08_g14140	GSCOC_T00030261001	60S ribosomal L24	1.35494
Cc01_g05850	GSCOC_T00027411001	Bidirectional sugar transporter SWEET3	1.35267
Cc09_g02320	GSCOC_T00017692001	Elongator complex 6	1.35266
Cc07_g17270	GSCOC_T00037453001	late blight resistance homolog R1A-6	1.35219
Cc00_g20860	GSCOC_T00007866001	Uncharacterized protein	1.35151
Cc00_g23840	GSCOC_T00006915001	60S ribosomal L23A	1.34895
Cc01_g02250	GSCOC_T00019321001	disease resistance RGA4	1.34836
Cc07_g07780	GSCOC_T00040138001	Auxin-responsive IAA9	1.3476
Cc00_g02800	GSCOC_T00009759001	Agamous-like MADS-box AGL8 homolog	1.34745
Cc02_g25760	GSCOC_T00028703001	Sister chromatid cohesion DCC1	1.34713
Cc02_g36040	GSCOC_T00042757001	Probable (S)-N-methylcoclaurine 3 -hydroxylase isozyme 2	1.34616
Cc03_g15190	GSCOC_T00026785001	UDP-glycosyltransferase 74E1	1.3434
Cc02_g03570	GSCOC_T00020244001	MADS-box SOC1	1.34337
Cc03_g02670	GSCOC_T00025931001	Receptor-like cytosolic serine threonine- kinase RBK2	1.34277
Cc08_g09200	GSCOC_T00017263001	L-gulonolactone oxidase	1.34152
Cc07_g19110	GSCOC_T00018640001	Uncharacterized protein	1.34137
Cc06_g20660	GSCOC_T00023022001	60S acidic ribosomal P0	1.34122
Cc00_g12080	GSCOC_T00010891001	Uncharacterized protein	1.34099
Cc08_g00260	GSCOC_T00005584001	Flotillin 1	1.34078
Cc01_g03010	GSCOC_T00019055001	disease resistance At4g10780	1.34012
Cc01_g20010	GSCOC_T00015984001	Ankyrin-3	1.33995
Cc00_g27120	GSCOC_T00006099001	disease resistance RPP13 1	1.33701
Cc07_g04890	GSCOC_T00039750001	Uncharacterized protein	1.33589
Cc11_g13740	GSCOC_T00032144001	Wall-associated receptor kinase-like 20	1.33536
Cc00_g11390	GSCOC_T00004898001	Basic leucine zipper 9	1.33443
Cc01_g07920	GSCOC_T00015471001	late blight resistance homolog R1B-16	1.33443
Cc02_g29640	GSCOC_T00009326001	Phosphatidylinositol 4-phosphate 5-kinase 6	1.33401
Cc00_g05370	GSCOC_T00000534001	E3 ubiquitin- ligase BIG BROTHER	1.33269
Cc10_g03610	GSCOC_T00024892001	Myosin heavy chain kinase B	1.32991
Cc06_g07970	GSCOC_T00031191001	Uncharacterized protein	1.3294
Cc02_g29960	GSCOC_T00038928001	disease resistance RPP13 1	1.32921
Cc00_g29230	GSCOC_T00010570001	disease resistance RGA3	1.32619
Cc04_g12550	GSCOC_T00005319001	LRR receptor-like serine threonine- kinase	1.3259
Cc04_g06310	GSCOC_T00022417001	Uncharacterized protein	1.32528
Cc10_g01720	GSCOC_T00024658001	Hexokinase- chloroplastic	1.3252
Cc02_g14620	GSCOC_T00013880001	Phospholipase A1-IIgamma	1.32517
Cc10_g13140	GSCOC_T00035335001	Small RNA degrading nuclease 5	1.32335
Cc07_g08370	GSCOC_T00040209001	Uncharacterized protein	1.32228
Cc06_g15110	GSCOC_T00030879001	Monodehydroascorbate reductase peroxisomal	1.32055
Cc01_g14770	GSCOC_T00028487001	UDP-glycosyltransferase 87A2	1.32024
Cc02_g18480	GSCOC_T00014392001	Peroxidase 10	1.32023
Cc02_g09850	GSCOC_T00029601001	Hippocampus abundant transcript 1	1.31982
Cc10_g14530	GSCOC_T00033590001	Uncharacterized protein	1.31945
Cc06_g03510	GSCOC_T00023635001	Nuclear transcription factor Y subunit B-8	1.31871
Cc02_g23010	GSCOC_T00014980001	WEB family At1g75720	1.31762
Cc00_g09730	GSCOC_T00013505001	disease resistance RGA4	1.31643
Cc02_g16600	GSCOC_T00014153001	Snakin-2	1.31618
Cc11_g05050	GSCOC_T00020445001	Pentatricopeptide repeat-containing mitochondrial	1.31596
Cc11_g04450	GSCOC_T00004790001	DEAD-box ATP-dependent RNA helicase 35	1.31497
Cc05_g09720	GSCOC_T00021547001	Uncharacterized protein	1.31307
Cc00_g31310	GSCOC_T00004842001	Actin-related 2 3 complex subunit 4	1.31284
Cc02_g25390	GSCOC_T00028752001	Uncharacterized protein At1g28695	1.31234
Cc04_g01500	GSCOC_T00021804001	Solute carrier family 25 member 44	1.31058
Cc05_g02890	GSCOC_T00020866001	1-aminocyclopropane-1-carboxylate oxidase 1	1.3099
Cc11_g00220	GSCOC_T00019447001	Probable galactinol--sucrose galactosyltransferase 2	1.30972
Cc08_g06870	GSCOC_T00025232001	Uncharacterized protein	1.30872
Cc04_g07380	GSCOC_T00022554001	ASPARTIC PROTEASE IN GUARD CELL 1	1.30704
Cc02_g11950	GSCOC_T00029353001	Transcription factor bHLH112	1.30663
Cc00_g28700	GSCOC_T00007394001	F-box PP2-B10	1.30627
Cc07_g10210	GSCOC_T00037147001	Thioredoxin H-type	1.30576
Cc11_g14360	GSCOC_T00032067001	Serine threonine- kinase PBS1	1.3045
Cc02_g29730	GSCOC_T00010184001	Histone	1.30362
Cc06_g12040	GSCOC_T00041583001	Uncharacterized protein	1.30353
Cc07_g02590	GSCOC_T00039457001	Peroxidase 63	1.30337
Cc06_g02020	GSCOC_T00023442001	Universal stress A	1.30023
Cc05_g02740	GSCOC_T00020891001	E3 ubiquitin- ligase COP1	1.29946
Cc03_g03080	GSCOC_T00025985001	Adenylate isopentenyltransferase chloroplastic	1.2993
Cc02_g05820	GSCOC_T00039102001	Uncharacterized protein	1.29846
Cc09_g08710	GSCOC_T00020848001	Calcium permeable stress-gated cation channel 1	1.29771
Cc00_g30420	GSCOC_T00004531001	Uncharacterized protein	1.29597
Cc08_g01120	GSCOC_T00038428001	Uncharacterized protein	1.29519
Cc01_g18330	GSCOC_T00016218001	Uncharacterized protein	1.29423
Cc01_g11870	GSCOC_T00028103001	Mitogen-activated kinase homolog NTF6	1.29411
Cc03_g08500	GSCOC_T00033271001	Uncharacterized protein	1.29364
Cc02_g16340	GSCOC_T00014117001	Uncharacterized protein	1.29342
Cc06_g17860	GSCOC_T00040378001	Uncharacterized protein	1.29336
Cc11_g00870	GSCOC_T00019685001	Transport and Golgi organization 2 homolog	1.29297
Cc03_g12560	GSCOC_T00015201001	Uncharacterized protein	1.29279
Cc02_g10590	GSCOC_T00029512001	Small nuclear ribonucleo F	1.2923
Cc05_g08120	GSCOC_T00016823001	Uncharacterized protein	1.29214
Cc11_g08760	GSCOC_T00032829001	late blight resistance homolog R1B-12	1.29187
Cc08_g04520	GSCOC_T00015641001	Uncharacterized protein	1.291
Cc11_g16320	GSCOC_T00038169001	Probable E3 ubiquitin- ligase XBOS31	1.28935
Cc11_g11330	GSCOC_T00032460001	chloroplastic	1.28878
Cc00_g04940	GSCOC_T00005513001	Uncharacterized protein	1.28877
Cc02_g32840	GSCOC_T00016704001	BONZAI 3	1.28769
Cc08_g02210	GSCOC_T00037683001	Disease resistance RPM1	1.28655
Cc11_g16260	GSCOC_T00038162001	Very-long-chain 3-oxoacyl- reductase	1.28638
Cc05_g10350	GSCOC_T00021458001	Gibberellin 2-beta-dioxygenase 3	1.28619
Cc01_g16350	GSCOC_T00016453001	Serine threonine- kinase OXI1	1.28576
Cc06_g02110	GSCOC_T00023454001	NRT1 PTR FAMILY	1.285
Cc11_g01040	GSCOC_T00019652001	Probable RNA helicase SDE3	1.28378
Cc02_g14570	GSCOC_T00013870001	GDSL esterase lipase At1g28580	1.2827
Cc01_g11790	GSCOC_T00028089001	Mitogen-activated kinase 3	1.2811
Cc06_g04360	GSCOC_T00042945001	Probable xyloglucan endotransglucosylase hydrolase 32	1.28103
Cc04_g09930	GSCOC_T00042525001	Uncharacterized protein	1.2807
Cc06_g23630	GSCOC_T00040544001	Probable serine threonine- kinase PBL8	1.28006
Cc09_g05510	GSCOC_T00013393001	Uncharacterized protein	1.27981
Cc02_g38330	GSCOC_T00027876001	Uncharacterized protein	1.27965
Cc03_g00190	GSCOC_T00025597001	Probable receptor kinase At5g18500	1.27682
Cc03_g03910	GSCOC_T00026092001	Uncharacterized protein	1.27665
Cc02_g13650	GSCOC_T00029121001	Auxin-repressed kDa	1.27584
[truncated: 4,483 more rows]

## Sheet: down-regulated
Gene ID	ORF Name	Protein Name	Fold Change
Cc05_g05110	GSCOC_T00035063001	Cytochrome P450 71D10	-10.9948
Cc00_g01740	GSCOC_T00002838001	Uncharacterized protein	-10.7793
Cc00_g11770	GSCOC_T00003637001	Tabersonine 16-O-methyltransferase	-10.4423
Cc00_g19610	GSCOC_T00004546001	Uncharacterized protein	-10.3924
Cc02_g38970	GSCOC_T00027783001	Uncharacterized protein	-10.2855
Cc00_g17430	GSCOC_T00013477001	Isoflavone reductase homolog P3	-10.2379
Cc00_g30240	GSCOC_T00008667001	Cysteine ase inhibitor 5	-10.091
Cc00_g06270	GSCOC_T00008047001	Annexin D8	-10.078
Cc03_g08430	GSCOC_T00033260001	Uncharacterized protein	-9.92074
Cc10_g14350	GSCOC_T00012028001	Uncharacterized protein	-9.64496
Cc04_g13840	GSCOC_T00035896001	Uncharacterized protein	-9.55233
Cc00_g00920	GSCOC_T00041147001	60S ribosomal L31	-9.5434
Cc05_g02200	GSCOC_T00018420001	ATP-dependent zinc metalloprotease FTSH chloroplastic	-9.50565
Cc11_g03390	GSCOC_T00025420001	Isoflavone reductase homolog	-9.48009
Cc05_g01090	GSCOC_T00000911001	Uncharacterized protein	-9.44508
Cc02_g26640	GSCOC_T00024964001	26S proteasome non-ATPase regulatory subunit 1	-9.44378
Cc00_g02610	GSCOC_T00006644001	Lupeol synthase	-9.43107
Cc04_g13850	GSCOC_T00035898001	Cysteine ase inhibitor 1	-9.42278
Cc11_g04220	GSCOC_T00001335001	polyol transporter 2	-9.40466
Cc08_g04310	GSCOC_T00034251001	Uncharacterized protein	-9.40436
Cc03_g12160	GSCOC_T00015275001	Uncharacterized protein	-9.33947
Cc02_g21110	GSCOC_T00014747001	Leucoanthocyanidin dioxygenase	-9.27462
Cc10_g06550	GSCOC_T00034639001	DETOXIFICATION 41	-9.22752
Cc01_g16920	GSCOC_T00016386001	Uncharacterized protein	-9.21443
Cc02_g17310	GSCOC_T00014242001	Probable mitochondrial chaperone bcs1	-9.15858
Cc00_g00430	GSCOC_T00036128001	Serine threonine- kinase fray2	-9.12015
Cc10_g00450	GSCOC_T00024495001	8-amino-7-oxononanoate synthase	-9.08536
Cc11_g00400	GSCOC_T00019478001	Acidic endochitinase	-8.94919
Cc04_g13390	GSCOC_T00018295001	Uncharacterized protein	-8.9092
Cc06_g00090	GSCOC_T00023175001	Two-component response regulator ARR12	-8.88948
Cc03_g14230	GSCOC_T00031817001	Basic endochitinase	-8.87535
Cc11_g06160	GSCOC_T00020610001	DETOXIFICATION 6	-8.85746
Cc10_g14370	GSCOC_T00012032001	F-box kelch-repeat At1g57790	-8.82906
Cc00_g20380	GSCOC_T00002063001	FK506-binding 2	-8.8237
Cc06_g00100	GSCOC_T00023176001	Mitotic checkpoint BUB3	-8.81892
Cc00_g33670	GSCOC_T00002236001	Uncharacterized protein	-8.80979
Cc11_g08350	GSCOC_T00032887001	Kirola	-8.78106
Cc09_g03850	GSCOC_T00017496001	Flavonol sulfotransferase-like	-8.73861
Cc01_g20690	GSCOC_T00015903001	REF SRPP At3g05500	-8.73617
Cc07_g03400	GSCOC_T00039569001	Uncharacterized protein	-8.72037
Cc00_g14810	GSCOC_T00006681001	Glutamate dehydrogenase B	-8.70685
Cc06_g20490	GSCOC_T00022983001	Uncharacterized acetyltransferase At3g50280	-8.69648
Cc06_g21940	GSCOC_T00015608001	NLP2	-8.69319
Cc08_g06230	GSCOC_T00040964001	Glutamate receptor	-8.69144
Cc06_g23830	GSCOC_T00040509001	Probable caffeine synthase 3	-8.65727
Cc00_g02590	GSCOC_T00006642001	Lupeol synthase	-8.64301
Cc04_g03310	GSCOC_T00022024001	Uncharacterized protein	-8.60418
Cc00_g16430	GSCOC_T00005624001	8-hydroxyquercetin 8-O-methyltransferase	-8.58299
Cc00_g29670	GSCOC_T00005066001	Uncharacterized protein	-8.57727
Cc08_g00370	GSCOC_T00038532001	Uncharacterized protein	-8.54345
Cc00_g02600	GSCOC_T00006643001	Lupeol synthase	-8.50347
Cc00_g13270	GSCOC_T00011541001	Esterase PIR7B	-8.4923
Cc02_g14190	GSCOC_T00013821001	UDP-glycosyltransferase 79B6	-8.44345
Cc00_g12360	GSCOC_T00006622001	Fructose-	-8.42859
Cc06_g14780	GSCOC_T00041210001	Uncharacterized protein	-8.39022
Cc00_g18670	GSCOC_T00013357001	Serine threonine- kinase fray2	-8.39003
Cc06_g17970	GSCOC_T00040394001	Uncharacterized protein	-8.38938
Cc00_g07350	GSCOC_T00006803001	ALA-interacting subunit 2	-8.38597
Cc11_g00800	GSCOC_T00019749001	RING-box 1a	-8.36714
Cc06_g18010	GSCOC_T00040401001	Catalase-1	-8.35527
Cc06_g14770	GSCOC_T00041212001	Uncharacterized protein	-8.32221
Cc11_g05490	GSCOC_T00020506001	Macrophage migration inhibitory factor homolog	-8.32128
Cc09_g05070	GSCOC_T00007080001	Cationic amino acid transporter 5	-8.30539
Cc07_g14720	GSCOC_T00036575001	1-aminocyclopropane-1-carboxylate oxidase 2	-8.26559
Cc03_g05110	GSCOC_T00026254001	1-aminocyclopropane-1-carboxylate oxidase homolog 12	-8.26431
Cc00_g06350	GSCOC_T00004108001	F-box LRR-repeat MAX2 homolog	-8.20588
Cc07_g03410	GSCOC_T00039570001	8-amino-7-oxononanoate synthase	-8.19798
Cc09_g06530	GSCOC_T00005104001	Uncharacterized protein	-8.17829
Cc02_g10170	GSCOC_T00029558001	Synaptonemal complex 1	-8.17733
Cc01_g01320	GSCOC_T00037928001	Plastocyanin	-8.17064
Cc11_g08340	GSCOC_T00032888001	Kirola	-8.16781
Cc09_g02500	GSCOC_T00017668001	Serine threonine- kinase BSK8	-8.1593
Cc06_g20590	GSCOC_T00023003001	Uncharacterized protein	-8.15293
Cc00_g15990	GSCOC_T00001470001	F-box LRR-repeat At5g02930	-8.11984
Cc08_g07760	GSCOC_T00011868001	Tetratricopeptide repeat 7A	-8.08448
Cc06_g23820	GSCOC_T00040514001	Lupeol synthase	-8.08164
Cc04_g16390	GSCOC_T00035731001	(-)-germacrene D synthase	-8.07889
Cc10_g11450	GSCOC_T00013664001	Gibberellin-regulated 9	-8.06223
Cc00_g17890	GSCOC_T00012819001	60S ribosomal L32-1	-8.02607
Cc04_g15220	GSCOC_T00006570001	MDIS1-interacting receptor like kinase 2	-8.01479
Cc00_g14760	GSCOC_T00010967001	Mitogen-activated kinase kinase 4	-8.00462
Cc01_g01310	GSCOC_T00037929001	Plastocyanin chloroplastic	-7.96717
Cc00_g15240	GSCOC_T00001826001	UDP-glycosyltransferase 74E2	-7.92338
Cc02_g03490	GSCOC_T00020234001	Uncharacterized protein	-7.89905
Cc01_g00700	GSCOC_T00011056001	Uncharacterized protein	-7.88431
Cc01_g08100	GSCOC_T00015499001	Replication A 70 kDa DNA-binding subunit	-7.86743
Cc08_g04320	GSCOC_T00034252001	Uncharacterized protein	-7.86425
Cc11_g01750	GSCOC_T00019522001	Cytochrome P450 76C4	-7.85973
Cc00_g25050	GSCOC_T00004661001	NLP7	-7.84583
Cc00_g28710	GSCOC_T00011510001	Uncharacterized protein	-7.8449
Cc00_g22730	GSCOC_T00008889001	Reticuline oxidase	-7.8311
Cc03_g14650	GSCOC_T00026692001	late blight resistance homolog R1B-17	-7.79892
Cc05_g13970	GSCOC_T00020991001	farnesyltransferase geranylgeranyltransferase type-1 subunit alpha	-7.7609
Cc00_g17200	GSCOC_T00009145001	Beta-amylase chloroplastic	-7.73799
Cc07_g18180	GSCOC_T00018785001	Pentatricopeptide repeat-containing chloroplastic	-7.73719
Cc00_g05460	GSCOC_T00000304001	Pathogenesis-related 5	-7.73523
Cc00_g26360	GSCOC_T00002363001	S-norcoclaurine synthase	-7.70509
Cc06_g14370	GSCOC_T00041265001	Uncharacterized protein	-7.67949
Cc00_g33680	GSCOC_T00002237001	Uncharacterized protein	-7.66716
Cc00_g05440	GSCOC_T00000302001	Uncharacterized protein	-7.66696
Cc05_g02990	GSCOC_T00033479001	Uncharacterized protein	-7.652
Cc00_g30960	GSCOC_T00007567001	Uncharacterized protein	-7.64158
Cc00_g02070	GSCOC_T00001840001	Disease resistance RPS5	-7.63618
Cc06_g13650	GSCOC_T00041366001	Mitogen-activated kinase kinase 4	-7.59185
Cc05_g07850	GSCOC_T00016789001	Tabersonine 16-O-methyltransferase	-7.55536
Cc07_g00260	GSCOC_T00019092001	Chlorophyll a-b binding chloroplastic	-7.53989
Cc02_g15300	GSCOC_T00013973001	Probable LRR receptor-like serine threonine- kinase At3g47570	-7.5168
Cc01_g05310	GSCOC_T00011440001	Prohibitin- mitochondrial	-7.49115
Cc02_g16490	GSCOC_T00014141001	Uncharacterized protein	-7.47212
Cc00_g08920	GSCOC_T00008674001	60S ribosomal L24	-7.4669
Cc00_g26370	GSCOC_T00002364001	amidase	-7.46481
Cc02_g21460	GSCOC_T00014787001	Midasin	-7.45622
Cc10_g03260	GSCOC_T00024849001	Uncharacterized protein	-7.45359
Cc00_g33470	GSCOC_T00006799001	Uncharacterized protein	-7.44581
Cc00_g23750	GSCOC_T00012207001	Isoflavone reductase homolog	-7.4426
Cc04_g04860	GSCOC_T00022225001	Uncharacterized protein	-7.44097
Cc03_g08980	GSCOC_T00042734001	Uncharacterized protein	-7.44076
Cc02_g30170	GSCOC_T00038977001	Mpv17	-7.44026
Cc07_g18460	GSCOC_T00018751001	Uncharacterized protein	-7.4296
Cc11_g11580	GSCOC_T00032426001	Cytosolic sulfotransferase 12	-7.42305
Cc00_g34310	GSCOC_T00012888001	Beta-glucosidase 27	-7.4161
Cc04_g13380	GSCOC_T00018297001	UDP-glycosyltransferase 74E2	-7.39056
Cc11_g06750	GSCOC_T00020700001	Uncharacterized protein	-7.37299
Cc03_g13510	GSCOC_T00018980001	Auxin response factor 2	-7.3584
Cc01_g09810	GSCOC_T00024050001	Uncharacterized protein	-7.3533
Cc11_g01160	GSCOC_T00019618001	late blight resistance homolog R1B-13	-7.35266
Cc08_g14550	GSCOC_T00030208001	Glutathione S-transferase T2	-7.31145
Cc02_g13400	GSCOC_T00029162001	Lipoxygenase chloroplastic	-7.30692
Cc00_g27580	GSCOC_T00003716001	Ubiquitin-60S ribosomal L40	-7.29727
Cc10_g14640	GSCOC_T00033608001	Uncharacterized protein	-7.28902
Cc00_g01300	GSCOC_T00010923001	F-box CPR1	-7.26746
Cc00_g31610	GSCOC_T00012947001	60S ribosomal L7a-1	-7.26635
Cc08_g08870	GSCOC_T00017222001	BURP domain RD22	-7.23467
Cc11_g06480	GSCOC_T00020664001	Uncharacterized protein	-7.2143
Cc07_g06310	GSCOC_T00039932001	1-aminocyclopropane-1-carboxylate oxidase 1	-7.19689
Cc07_g06040	GSCOC_T00039896001	Lipase	-7.18882
Cc00_g06310	GSCOC_T00008053001	Annexin RJ4	-7.17657
Cc09_g04830	GSCOC_T00017375001	Probable inorganic phosphate transporter 1-8	-7.16068
Cc11_g04040	GSCOC_T00034028001	Acidic endochitinase	-7.15831
Cc03_g14350	GSCOC_T00031834001	Stearoyl	-7.1319
Cc00_g17120	GSCOC_T00003964001	UDP-glycosyltransferase 85A3	-7.11965
Cc06_g23400	GSCOC_T00040579001	WD repeat-containing 76	-7.1126
Cc00_g07890	GSCOC_T00000466001	Uncharacterized protein	-7.10721
Cc10_g15000	GSCOC_T00033662001	MDIS1-interacting receptor like kinase 2	-7.09722
Cc04_g04210	GSCOC_T00022143001	Signal peptidase complex catalytic subunit SEC11C	-7.08997
Cc01_g04510	GSCOC_T00041173001	Probable feruloyl esterase A	-7.07815
Cc10_g04410	GSCOC_T00034938001	Patatin-11	-7.05622
Cc03_g07340	GSCOC_T00026583001	Probable caffeine synthase 3	-7.04848
Cc11_g10390	GSCOC_T00032584001	Probable aquaporin PIP-type 7a	-7.02837
Cc02_g29770	GSCOC_T00038878001	Uncharacterized protein	-7.02631
Cc07_g16340	GSCOC_T00037573001	B3 domain-containing REM9	-7.02129
Cc00_g01500	GSCOC_T00010663001	Stem-specific TSJT1	-7.01734
Cc07_g15180	GSCOC_T00036509001	Uncharacterized protein	-7.01224
Cc00_g29880	GSCOC_T00006934001	8-hydroxyquercetin 8-O-methyltransferase	-7.00001
Cc06_g14350	GSCOC_T00041268001	Uncharacterized protein	-6.97856
Cc11_g00990	GSCOC_T00019668001	Uncharacterized protein	-6.96127
Cc00_g06010	GSCOC_T00000129001	Insulin-degrading enzyme-like peroxisomal	-6.93956
Cc00_g11730	GSCOC_T00003631001	Tabersonine 16-O-methyltransferase	-6.93172
Cc11_g02660	GSCOC_T00025550001	Probable LRR receptor-like serine threonine- kinase At3g47570	-6.93113
Cc03_g08280	GSCOC_T00033229001	Uncharacterized protein	-6.92264
Cc00_g21670	GSCOC_T00011702001	Elongation factor 1-alpha	-6.92056
Cc09_g04810	GSCOC_T00017378001	Apyrase	-6.90113
Cc09_g08560	GSCOC_T00020826001	Disease resistance RPM1	-6.89076
Cc00_g03150	GSCOC_T00003071001	Annexin RJ4	-6.88807
Cc06_g14170	GSCOC_T00041292001	HD domain-containing 2	-6.88524
Cc00_g16300	GSCOC_T00008241001	late blight resistance homolog R1A-6	-6.87757
Cc02_g36120	GSCOC_T00006316001	Nascent polypeptide-associated complex subunit alpha	-6.86772
Cc03_g13890	GSCOC_T00031758001	Lupeol synthase	-6.8649
Cc00_g30300	GSCOC_T00000842001	Uncharacterized protein	-6.849
Cc03_g13420	GSCOC_T00018964001	Uncharacterized protein	-6.84645
Cc00_g18520	GSCOC_T00008821001	Cytochrome P450 71A2	-6.84106
Cc00_g29680	GSCOC_T00006763001	29 kDa ribonucleo chloroplastic	-6.83199
Cc00_g18330	GSCOC_T00001115001	Uncharacterized protein	-6.82777
Cc02_g28880	GSCOC_T00018186001	Uncharacterized protein	-6.80208
Cc04_g16350	GSCOC_T00035725001	Valencene synthase	-6.79747
Cc08_g10750	GSCOC_T00027052001	Beta- insoluble isoenzyme CWINV3	-6.79293
Cc00_g00220	GSCOC_T00036099001	B3 domain-containing REM21	-6.78281
Cc06_g17980	GSCOC_T00040395001	Uncharacterized protein	-6.77918
Cc09_g07530	GSCOC_T00036244001	Uncharacterized protein	-6.75029
Cc04_g15860	GSCOC_T00042373001	Uncharacterized protein	-6.74324
Cc07_g20820	GSCOC_T00027274001	Uncharacterized protein	-6.7277
Cc11_g10880	GSCOC_T00032517001	Uncharacterized protein	-6.72289
Cc07_g20400	GSCOC_T00015691001	Uncharacterized protein	-6.72214
Cc00_g32590	GSCOC_T00011519001	Uncharacterized protein	-6.70931
Cc03_g13910	GSCOC_T00031760001	Lupeol synthase	-6.7093
Cc07_g09760	GSCOC_T00037200001	Isoflavone reductase homolog	-6.70517
Cc02_g33850	GSCOC_T00008629001	Small nuclear ribonucleo Sm D3	-6.70253
Cc11_g01600	GSCOC_T00019542001	Probable LRR receptor-like serine threonine- kinase At3g47570	-6.68099
Cc10_g15990	GSCOC_T00033804001	Eukaryotic translation initiation factor 3 subunit I	-6.67433
Cc04_g16990	GSCOC_T00035821001	Pectinesterase 1	-6.66766
Cc11_g04830	GSCOC_T00042919001	Phosphoserine chloroplastic	-6.66573
Cc00_g26520	GSCOC_T00008501001	Uncharacterized protein	-6.6475
Cc06_g12970	GSCOC_T00041467001	Probable LRR receptor-like serine threonine- kinase At1g56140	-6.64057
Cc04_g11000	GSCOC_T00008919001	Beta-	-6.63877
Cc02_g16030	GSCOC_T00014078001	Probable LRR receptor-like serine threonine- kinase At3g47570	-6.63368
Cc04_g13410	GSCOC_T00018292001	Uncharacterized protein	-6.62681
Cc04_g16400	GSCOC_T00035735001	(-)-germacrene D synthase	-6.62553
Cc02_g28380	GSCOC_T00025216001	Uncharacterized protein	-6.62022
Cc00_g03100	GSCOC_T00003065001	NEP1-interacting -like 1	-6.60972
Cc00_g28210	GSCOC_T00005957001	Indole-3-glycerol phosphate chloroplastic	-6.59511
Cc06_g20880	GSCOC_T00015854001	Uncharacterized protein	-6.5868
Cc11_g00460	GSCOC_T00019488001	Acidic endochitinase	-6.58609
Cc06_g17470	GSCOC_T00036403001	Uncharacterized protein	-6.58547
Cc04_g07530	GSCOC_T00022577001	Uncharacterized protein	-6.57152
Cc10_g14660	GSCOC_T00033611001	Uncharacterized protein	-6.56438
Cc07_g18760	GSCOC_T00018700001	Tyrosine-sulfated glycopeptide receptor 1	-6.54281
Cc09_g08660	GSCOC_T00020839001	LRR receptor-like serine threonine- kinase FLS2	-6.53053
Cc10_g11790	GSCOC_T00031855001	60S ribosomal L9	-6.52689
Cc09_g05150	GSCOC_T00007088001	Cytochrome P450 89A2	-6.52468
Cc10_g00800	GSCOC_T00024539001	Uncharacterized protein	-6.51411
Cc10_g11500	GSCOC_T00013674001	Gibberellin-regulated 9	-6.50643
Cc00_g35590	GSCOC_T00013712001	Gibberellin 3-beta-dioxygenase 3	-6.49998
Cc02_g31800	GSCOC_T00027489001	Synaptonemal complex 1	-6.49574
Cc04_g07320	GSCOC_T00022543001	F-box LRR-repeat At3g59200	-6.49574
Cc06_g20620	GSCOC_T00023010001	Homeobox-leucine zipper HAT9	-6.48981
Cc05_g13110	GSCOC_T00021104001	Dihydroflavonol 4-reductase	-6.47666
Cc08_g09410	GSCOC_T00017297001	UPF0481 At3g02645	-6.46844
Cc05_g02650	GSCOC_T00020911001	Uncharacterized protein	-6.45991
Cc05_g01790	GSCOC_T00015759001	Viral IAP-associated factor homolog	-6.45702
Cc04_g04080	GSCOC_T00022126001	Disease resistance RPH8A	-6.42571
Cc00_g06300	GSCOC_T00008051001	Annexin D8	-6.42483
Cc00_g26250	GSCOC_T00007871001	Uncharacterized protein	-6.42038
Cc10_g15240	GSCOC_T00033697001	UDP-xylose transporter 3	-6.41691
Cc04_g01540	GSCOC_T00021809001	lipid-transfer DIR1	-6.41378
Cc00_g02490	GSCOC_T00010286001	Metal tolerance 5	-6.40809
Cc00_g20040	GSCOC_T00008217001	Uncharacterized protein	-6.39593
Cc01_g08270	GSCOC_T00015527001	Alcohol dehydrogenase-like 7	-6.37647
Cc04_g13150	GSCOC_T00018885001	40S ribosomal S10-2	-6.37314
Cc01_g03100	GSCOC_T00019030001	Secologanin synthase	-6.36763
Cc08_g14560	GSCOC_T00030207001	Glutathione S-transferase T2	-6.36628
Cc11_g02670	GSCOC_T00025549001	Probable LRR receptor-like serine threonine- kinase At3g47570	-6.36489
Cc03_g04740	GSCOC_T00026202001	Magnesium transporter MRS2-I	-6.35822
Cc08_g11740	GSCOC_T00027180001	Phytoene chloroplastic	-6.35807
Cc00_g00440	GSCOC_T00036129001	Sister chromatid cohesion PDS5 homolog A	-6.34879
Cc09_g06990	GSCOC_T00036334001	Probable caffeine synthase 3	-6.3386
Cc10_g16410	GSCOC_T00013397001	Uncharacterized protein	-6.32472
Cc03_g10080	GSCOC_T00031009001	Major allergen Pru ar 1	-6.32415
Cc00_g32630	GSCOC_T00000079001	Probable LRR receptor-like serine threonine- kinase At3g47570	-6.32251
Cc00_g33580	GSCOC_T00000563001	Uncharacterized protein	-6.31769
Cc06_g16760	GSCOC_T00004127001	Thiol protease SEN102	-6.31763
Cc10_g00790	GSCOC_T00024538001	Uncharacterized protein	-6.30897
Cc09_g08160	GSCOC_T00020754001	Alcohol dehydrogenase class-3	-6.30376
Cc01_g18860	GSCOC_T00016144001	Auxin-induced 22D	-6.2699
Cc05_g03880	GSCOC_T00017318001	Cysteine-rich receptor kinase 10	-6.26775
Cc00_g02870	GSCOC_T00004307001	Probable E3 ubiquitin- ligase ARI2	-6.25575
Cc03_g12640	GSCOC_T00015189001	Uncharacterized protein	-6.24916
Cc11_g07440	GSCOC_T00018053001	Acetyl-coenzyme A chloroplastic glyoxysomal	-6.23696
Cc00_g24670	GSCOC_T00005960001	Cytochrome P450 81D1	-6.23568
Cc00_g20010	GSCOC_T00008214001	Uncharacterized protein	-6.22552
Cc02_g17300	GSCOC_T00014241001	Cellulose synthase D3	-6.21846
Cc02_g15290	GSCOC_T00013972001	Probable LRR receptor-like serine threonine- kinase At3g47570	-6.21501
Cc00_g22900	GSCOC_T00010339001	Tetratricopeptide repeat 1	-6.20934
Cc02_g26740	GSCOC_T00024977001	Beta-hexosaminidase	-6.20865
Cc11_g07230	GSCOC_T00018079001	Uncharacterized protein	-6.20865
Cc00_g35650	GSCOC_T00002347001	Uncharacterized protein	-6.19666
Cc00_g15540	GSCOC_T00004033001	60S ribosomal L8-3	-6.17103
Cc02_g26650	GSCOC_T00024965001	26S proteasome non-ATPase regulatory subunit 1	-6.17
Cc08_g07540	GSCOC_T00025386001	Santalene and bergamotene chloroplastic	-6.16996
Cc11_g07450	GSCOC_T00018052001	Acetyl-coenzyme A chloroplastic glyoxysomal	-6.16996
Cc07_g14320	GSCOC_T00036628001	Mechanosensitive ion channel chloroplastic	-6.1591
Cc01_g17340	GSCOC_T00016336001	Alcohol dehydrogenase 1	-6.14476
Cc00_g06030	GSCOC_T00000131001	Uncharacterized protein	-6.13855
Cc00_g25910	GSCOC_T00006243001	Glucan endo-	-6.13222
Cc08_g03930	GSCOC_T00034192001	Cytochrome P450 76C4	-6.13192
Cc02_g22100	GSCOC_T00014870001	Uncharacterized protein	-6.12591
Cc06_g23610	GSCOC_T00040546001	Cellulose synthase A catalytic subunit	-6.12112
Cc07_g18740	GSCOC_T00018705001	Probable S-adenosylmethionine-dependent methyltransferase At5g37990	-6.11488
Cc00_g16670	GSCOC_T00000900001	S-norcoclaurine synthase	-6.10838
Cc11_g04950	GSCOC_T00020422001	Disease resistance RPM1	-6.08604
Cc07_g02560	GSCOC_T00039454001	Gibberellin-regulated 14	-6.08588
Cc08_g06460	GSCOC_T00036035001	60S ribosomal L17	-6.08401
Cc08_g17100	GSCOC_T00035696001	Auxin-induced 5NG4	-6.08017
Cc05_g06230	GSCOC_T00042105001	Dynamin-related 1A	-6.03491
Cc00_g06020	GSCOC_T00000130001	Serine threonine- kinase 38	-6.03437
Cc04_g14120	GSCOC_T00035939001	Uncharacterized exonuclease domain-containing At3g15140	-6.03437
Cc05_g07740	GSCOC_T00016773001	Uncharacterized protein	-6.03326
Cc00_g11200	GSCOC_T00010561001	MDIS1-interacting receptor like kinase 2	-6.02728
Cc11_g02460	GSCOC_T00018499001	40S ribosomal S4	-6.02323
Cc09_g05950	GSCOC_T00033382001	Wall-associated receptor kinase-like 1	-6.0077
Cc03_g07140	GSCOC_T00026554001	ROOT HAIR DEFECTIVE 3 homolog 1	-6.00457
Cc00_g24060	GSCOC_T00009222001	BURP domain RD22	-5.98537
Cc09_g04840	GSCOC_T00017372001	Probable inorganic phosphate transporter 1-8	-5.97665
Cc11_g00440	GSCOC_T00019484001	Uncharacterized protein	-5.96064
Cc00_g14870	GSCOC_T00001457001	Uncharacterized protein	-5.96041
Cc09_g05570	GSCOC_T00033447001	Uncharacterized protein	-5.95745
Cc03_g13740	GSCOC_T00031729001	Polygalacturonase-1 non-catalytic subunit beta	-5.95615
Cc00_g06290	GSCOC_T00008050001	Annexin D7	-5.95604
Cc08_g06040	GSCOC_T00024418001	Long-chain-alcohol oxidase FAO4A	-5.95164
Cc06_g13560	GSCOC_T00041380001	Anthocyanidin 3-O-glucosyltransferase	-5.95157
Cc10_g03910	GSCOC_T00024934001	Uncharacterized protein	-5.94788
Cc02_g24360	GSCOC_T00002335001	Uncharacterized protein	-5.93159
Cc00_g33030	GSCOC_T00002213001	Pectinesterase PPME1	-5.93033
Cc00_g13460	GSCOC_T00010142001	Hydroxysteroid 11-beta-dehydrogenase 1 B	-5.9301
Cc00_g33140	GSCOC_T00007369001	SPX domain-containing 1	-5.92433
Cc09_g09290	GSCOC_T00023068001	Disease resistance RPP8	-5.91572
Cc10_g11200	GSCOC_T00018465001	Uncharacterized protein	-5.91532
Cc02_g34100	GSCOC_T00000645001	Transcription factor bHLH19	-5.90525
Cc00_g32510	GSCOC_T00010420001	Beta-glucosidase 10	-5.88238
Cc08_g11280	GSCOC_T00027127001	Receptor 12	-5.87899
Cc06_g21330	GSCOC_T00018131001	Cyclin-dependent kinase G-2	-5.87894
Cc01_g08800	GSCOC_T00023917001	Uncharacterized protein	-5.87281
Cc06_g23810	GSCOC_T00040517001	Lupeol synthase	-5.87154
Cc00_g26530	GSCOC_T00011740001	Probable LRR receptor-like serine threonine- kinase At3g47570	-5.87016
Cc00_g16020	GSCOC_T00009614001	late blight resistance homolog R1B-17	-5.86443
Cc11_g03940	GSCOC_T00034003001	Uncharacterized hydrolase	-5.86311
Cc06_g23120	GSCOC_T00040622001	Uncharacterized protein	-5.84843
Cc01_g03710	GSCOC_T00033057001	Omega-6 fatty acid endoplasmic reticulum isozyme 2	-5.83693
Cc03_g08290	GSCOC_T00033230001	late blight resistance homolog R1B-14	-5.82014
Cc02_g24860	GSCOC_T00028832001	Homocysteine S-methyltransferase 3	-5.81317
Cc03_g14890	GSCOC_T00026735001	disease resistance RGA4	-5.80572
Cc04_g04090	GSCOC_T00022127001	Uncharacterized protein	-5.78752
Cc00_g23470	GSCOC_T00007334001	Beta-xylosidase alpha-L-arabinofuranosidase 1 (Fragment)	-5.78517
Cc00_g11280	GSCOC_T00009254001	Probable LRR receptor-like serine threonine- kinase At3g47570	-5.77892
Cc10_g04570	GSCOC_T00034919001	Probable carboxylesterase 12	-5.76639
Cc03_g08860	GSCOC_T00033327001	Uncharacterized protein	-5.75675
Cc00_g33790	GSCOC_T00013321001	Cysteine synthase	-5.74859
Cc03_g08590	GSCOC_T00033286001	Uncharacterized protein	-5.74778
Cc11_g03850	GSCOC_T00033994001	Stem-specific TSJT1	-5.7451
Cc11_g09480	GSCOC_T00032718001	Uncharacterized protein	-5.73655
Cc00_g00370	GSCOC_T00036120001	Origin of replication complex subunit 2	-5.73548
Cc09_g09650	GSCOC_T00004086001	Uncharacterized protein	-5.73182
Cc04_g06680	GSCOC_T00022463001	Probable S-adenosylmethionine-dependent methyltransferase At5g37990	-5.73169
Cc02_g31930	GSCOC_T00027470001	UDP-glycosyltransferase 83A1	-5.70968
Cc00_g06420	GSCOC_T00004117001	(-)-germacrene D synthase	-5.70798
Cc06_g15970	GSCOC_T00030751001	18 kDa seed maturation	-5.70784
Cc00_g14820	GSCOC_T00006682001	Glutamate dehydrogenase	-5.70625
Cc05_g03490	GSCOC_T00033568001	Stromal cell-derived factor 2	-5.7028
Cc00_g29590	GSCOC_T00006885001	Disease resistance RFL1	-5.68796
Cc11_g06910	GSCOC_T00020724001	Late blight resistance R1-A	-5.68075
Cc05_g08910	GSCOC_T00016930001	late blight resistance homolog R1B-14	-5.67784
Cc00_g14380	GSCOC_T00010681001	Uncharacterized protein	-5.67202
Cc11_g02250	GSCOC_T00033003001	F-box FBD LRR-repeat At5g22670	-5.66417
Cc11_g06110	GSCOC_T00020602001	DETOXIFICATION 6	-5.65935
Cc05_g08940	GSCOC_T00016935001	G-type lectin S-receptor-like serine threonine- kinase SD2-5	-5.65677
Cc03_g08970	GSCOC_T00042735001	26S proteasome non-ATPase regulatory subunit 1	-5.63744
Cc04_g15660	GSCOC_T00042342001	Momilactone A synthase	-5.63706
Cc09_g08150	GSCOC_T00020752001	UDP-glycosyltransferase 85A2	-5.63338
Cc08_g07930	GSCOC_T00011897001	Probable receptor kinase At5g18500	-5.62103
Cc04_g16750	GSCOC_T00035785001	Uncharacterized protein	-5.61921
Cc11_g11450	GSCOC_T00032444001	Uncharacterized protein	-5.61921
Cc09_g03130	GSCOC_T00017586001	GDSL esterase lipase At5g33370	-5.61774
Cc11_g00530	GSCOC_T00007406001	Uncharacterized protein	-5.61037
Cc00_g05760	GSCOC_T00007673001	BTB POZ domain-containing At3g56230	-5.60732
Cc00_g27970	GSCOC_T00001314001	40S ribosomal S14-3	-5.60598
Cc00_g16210	GSCOC_T00013153001	Uncharacterized protein	-5.59843
Cc00_g12980	GSCOC_T00005422001	8-hydroxyquercetin 8-O-methyltransferase	-5.58382
Cc02_g25030	GSCOC_T00028809001	Plasma membrane ATPase 1	-5.58061
Cc02_g26660	GSCOC_T00024966001	Uncharacterized membrane	-5.57231
Cc10_g10810	GSCOC_T00019415001	Transcription factor BTF3	-5.56128
Cc06_g04630	GSCOC_T00042976001	UDP-glycosyltransferase 73C4	-5.55183
Cc08_g08440	GSCOC_T00009035001	BURP domain RD22	-5.54966
Cc00_g34850	GSCOC_T00004662001	Cysteine chloroplastic chromoplastic	-5.54866
Cc02_g29980	GSCOC_T00038932001	60S ribosomal L7-4	-5.53668
Cc08_g12120	GSCOC_T00030523001	DNA repair RAD5B	-5.53556
Cc05_g08730	GSCOC_T00016905001	Secologanin synthase	-5.53037
Cc11_g00930	GSCOC_T00019676001	Peptidyl-prolyl cis-trans isomerase FKBP17- chloroplastic	-5.5205
Cc00_g15120	GSCOC_T00000075001	Uncharacterized protein	-5.51384
Cc02_g20690	GSCOC_T00014687001	MADS-box transcription factor 27	-5.51236
Cc00_g34430	GSCOC_T00000732001	Probable LRR receptor-like serine threonine- kinase At3g47570	-5.50435
Cc07_g06330	GSCOC_T00039934001	Uncharacterized protein	-5.50416
Cc00_g25570	GSCOC_T00001882001	3-hydroxyisobutyryl- hydrolase 1	-5.49912
Cc08_g08770	GSCOC_T00003998001	Probable LRR receptor-like serine threonine- kinase At3g47570	-5.49462
Cc10_g09830	GSCOC_T00031494001	Villin-3	-5.49423
Cc09_g07960	GSCOC_T00003784001	Chaperone	-5.48954
Cc11_g16090	GSCOC_T00038141001	Myosin heavy chain kinase B	-5.48917
Cc11_g03970	GSCOC_T00034011001	Uncharacterized protein	-5.48456
Cc07_g19740	GSCOC_T00033857001	Uncharacterized protein	-5.47112
Cc00_g21490	GSCOC_T00004209001	Cysteine-rich receptor kinase 10	-5.45952
Cc00_g06710	GSCOC_T00007498001	Uncharacterized protein	-5.45922
Cc09_g06590	GSCOC_T00005112001	DNA mismatch repair MSH6	-5.45763
Cc03_g04320	GSCOC_T00026142001	Perakine reductase	-5.4552
Cc03_g07680	GSCOC_T00026628001	Uncharacterized protein	-5.43572
Cc07_g06050	GSCOC_T00039898001	Uncharacterized protein	-5.42375
Cc07_g17240	GSCOC_T00037458001	Uncharacterized protein	-5.42122
Cc01_g18420	GSCOC_T00016207001	Hyoscyamine 6-dioxygenase	-5.40813
Cc06_g16620	GSCOC_T00030659001	Adenylosuccinate synthetase chloroplastic	-5.40124
Cc07_g16860	GSCOC_T00037508001	Nodulation-signaling pathway 2	-5.39417
Cc11_g03840	GSCOC_T00033992001	late blight resistance homolog R1B-14	-5.38271
Cc00_g30390	GSCOC_T00004757001	Actin-related 4	-5.37366
Cc02_g04900	GSCOC_T00020421001	Ras-related Rab-1D	-5.36885
Cc05_g03870	GSCOC_T00017319001	Cysteine-rich receptor kinase 10	-5.3535
Cc04_g14780	GSCOC_T00040755001	Germin subfamily T member 1	-5.34593
Cc03_g15610	GSCOC_T00026851001	NADPH-dependent oxidoreductase 2-alkenal reductase	-5.34534
Cc00_g29830	GSCOC_T00007719001	disease resistance At3g14460	-5.34426
Cc00_g12070	GSCOC_T00002445001	nuclease HARBI1	-5.34306
Cc10_g13660	GSCOC_T00035253001	Uncharacterized protein	-5.34091
Cc00_g30100	GSCOC_T00010014001	LRR receptor-like serine threonine- kinase EFR	-5.32776
Cc00_g12960	GSCOC_T00000115001	Probable LRR receptor-like serine threonine- kinase At3g47570	-5.32383
Cc06_g01030	GSCOC_T00023309001	UPF0098 MTH_273	-5.31136
Cc07_g13830	GSCOC_T00036691001	Probable pectate lyase 15	-5.29328
Cc01_g07070	GSCOC_T00030127001	Uncharacterized protein	-5.28931
Cc07_g07970	GSCOC_T00040159001	MADS-box transcription factor 27	-5.28272
Cc02_g14160	GSCOC_T00013817001	Bifunctional epoxide hydrolase 2	-5.28009
Cc02_g32390	GSCOC_T00012983001	Uncharacterized protein	-5.27938
Cc10_g08880	GSCOC_T00034328001	Uncharacterized protein	-5.27655
Cc07_g21200	GSCOC_T00027204001	Uncharacterized protein	-5.27645
Cc07_g17310	GSCOC_T00037447001	Auxin-induced 5NG4	-5.27334
Cc00_g15740	GSCOC_T00010314001	Disease resistance RPM1	-5.26631
Cc03_g02310	GSCOC_T00025872001	Uncharacterized protein	-5.25953
Cc03_g08640	GSCOC_T00033292001	Uncharacterized protein	-5.25274
Cc00_g15940	GSCOC_T00007990001	Disease resistance RPM1	-5.25222
Cc03_g13590	GSCOC_T00018997001	Uncharacterized protein	-5.24501
Cc00_g19690	GSCOC_T00011330001	Probable histone	-5.22753
Cc10_g12570	GSCOC_T00031975001	Uncharacterized protein	-5.21218
Cc11_g00920	GSCOC_T00019678001	Zinc finger ZPR1	-5.19676
Cc00_g16130	GSCOC_T00000994001	Thylakoidal processing peptidase chloroplastic	-5.19338
Cc00_g12380	GSCOC_T00013523001	Flavanone 7-O-glucoside 2 -O-beta-L-rhamnosyltransferase	-5.18334
Cc03_g14580	GSCOC_T00026676001	disease resistance RGA4	-5.18187
Cc09_g05740	GSCOC_T00033424001	Urease accessory	-5.16984
Cc07_g11590	GSCOC_T00036985001	DETOXIFICATION chloroplastic	-5.16745
Cc06_g03990	GSCOC_T00023700001	Uncharacterized protein	-5.15774
Cc05_g09750	GSCOC_T00021544001	Uncharacterized protein	-5.14228
Cc05_g02790	GSCOC_T00020886001	Uncharacterized protein	-5.14025
Cc03_g13880	GSCOC_T00031757001	Lupeol synthase	-5.13598
Cc11_g07870	GSCOC_T00032954001	Probable LRR receptor-like serine threonine- kinase At3g47570	-5.13166
Cc07_g14930	GSCOC_T00036551001	UDP-glycosyltransferase 85A2	-5.12703
Cc00_g14660	GSCOC_T00008133001	Prohibitin- mitochondrial	-5.11919
Cc05_g00080	GSCOC_T00017025001	Late embryogenesis abundant EMB564	-5.10588
Cc03_g05020	GSCOC_T00026239001	Cellulose synthase G2	-5.08571
Cc09_g10250	GSCOC_T00041068001	Uncharacterized protein	-5.08131
Cc01_g01080	GSCOC_T00037987001	UDP-glycosyltransferase 85A7	-5.07694
Cc11_g07950	GSCOC_T00032942001	Probable LRR receptor-like serine threonine- kinase At3g47570	-5.07311
Cc11_g00590	GSCOC_T00004218001	Uncharacterized protein	-5.06766
Cc08_g02740	GSCOC_T00037761001	Uncharacterized protein	-5.06473
Cc00_g05790	GSCOC_T00005672001	Uncharacterized protein	-5.06011
Cc02_g15700	GSCOC_T00014027001	Uncharacterized protein	-5.04125
Cc02_g04390	GSCOC_T00020350001	Ubiquitin-activating enzyme E1 2	-5.03675
Cc02_g38950	GSCOC_T00027787001	Ethylene-responsive transcription factor CRF4	-5.03551
Cc00_g31830	GSCOC_T00005818001	Probable LRR receptor-like serine threonine- kinase At3g47570	-5.03175
Cc02_g10820	GSCOC_T00029487001	Cysteine ase 15A	-5.0299
Cc04_g15720	GSCOC_T00042350001	NRT1 PTR FAMILY	-5.02678
Cc02_g07160	GSCOC_T00009481001	UDP-glycosyltransferase 85A2	-5.01656
Cc02_g28260	GSCOC_T00025196001	DNA ligase 1	-5.01656
Cc04_g17080	GSCOC_T00035835001	Uncharacterized protein	-5.01656
Cc07_g19960	GSCOC_T00033905001	Secologanin synthase	-5.01384
Cc10_g08470	GSCOC_T00034385001	UDP-glycosyltransferase 91C1	-5.00876
Cc10_g03640	GSCOC_T00024895001	Uncharacterized protein	-5.0032
Cc10_g05300	GSCOC_T00034827001	Stem-specific TSJT1	-5.00112
Cc05_g02070	GSCOC_T00040805001	Monothiol glutaredoxin- mitochondrial	-4.99722
Cc11_g02650	GSCOC_T00025552001	Probable LRR receptor-like serine threonine- kinase At3g47570	-4.99685
Cc06_g22160	GSCOC_T00017160001	Probable cation transporter HKT6	-4.99553
Cc01_g04000	GSCOC_T00040857001	V-type proton ATPase 16 kDa proteolipid subunit	-4.99453
Cc00_g06280	GSCOC_T00008048001	Annexin D8	-4.99244
Cc00_g34580	GSCOC_T00011410001	Coiled-coil domain-containing 25	-4.98641
Cc00_g11070	GSCOC_T00000146001	Secologanin synthase	-4.98254
Cc01_g04170	GSCOC_T00039287001	Uncharacterized protein	-4.98176
Cc02_g31550	GSCOC_T00027540001	Uncharacterized protein	-4.97875
Cc07_g14410	GSCOC_T00036618001	DETOXIFICATION 41	-4.97582
Cc08_g08690	GSCOC_T00009072001	Probable LRR receptor-like serine threonine- kinase At3g47570	-4.96701
Cc10_g01510	GSCOC_T00024623001	DEAD-box ATP-dependent RNA helicase 28	-4.96375
Cc02_g32880	GSCOC_T00016713001	DNA repair recA homolog mitochondrial	-4.95032
Cc09_g04190	GSCOC_T00017457001	Beta-glucosidase 42	-4.94359
Cc02_g33590	GSCOC_T00015398001	Nuclear transcription factor Y subunit C-2	-4.93526
Cc00_g03760	GSCOC_T00002031001	ribonuclease H At1g65750	-4.9282
Cc06_g20730	GSCOC_T00023032001	Vesicle-associated 4-2	-4.91694
Cc07_g06570	GSCOC_T00039972001	Xyloglucan galactosyltransferase KATAMARI1 homolog	-4.91385
Cc09_g06580	GSCOC_T00005111001	Uncharacterized protein	-4.9057
Cc01_g03860	GSCOC_T00040906001	Flavonol synthase flavanone 3-hydroxylase	-4.89987
Cc07_g17880	GSCOC_T00018833001	Cactin	-4.89477
Cc05_g04230	GSCOC_T00031627001	YIPF1 homolog	-4.89226
Cc00_g19180	GSCOC_T00011011001	Probable LRR receptor-like serine threonine- kinase At3g47570	-4.88745
Cc00_g22860	GSCOC_T00013113001	Protein-ribulosamine 3- chloroplastic	-4.88737
Cc10_g02170	GSCOC_T00024715001	S-type anion channel SLAH1	-4.88094
Cc04_g10680	GSCOC_T00042636001	WUSCHEL-related homeobox 8	-4.88072
Cc02_g21090	GSCOC_T00014745001	Purine permease 1	-4.8776
Cc04_g03300	GSCOC_T00022023001	Acid phosphatase 1	-4.87445
Cc11_g02930	GSCOC_T00025505001	Probable disease resistance RPP8 2	-4.87292
Cc00_g00300	GSCOC_T00036110001	Uncharacterized protein	-4.86829
Cc05_g02560	GSCOC_T00020936001	N-acetylglucosaminyl-phosphatidylinositol de-N-acetylase	-4.86483
Cc09_g04330	GSCOC_T00017440001	Uncharacterized protein	-4.86306
Cc00_g34050	GSCOC_T00007579001	Rac-like GTP-binding RAC13	-4.86145
Cc10_g12650	GSCOC_T00031984001	Clathrin coat assembly AP180	-4.86145
Cc00_g09290	GSCOC_T00004563001	60S ribosomal L19-2	-4.85417
Cc00_g27790	GSCOC_T00013497001	60S ribosomal L19-2	-4.85122
Cc03_g14550	GSCOC_T00026673001	Uncharacterized protein	-4.84879
Cc01_g02850	GSCOC_T00013223001	Probable acyl-activating enzyme peroxisomal	-4.84658
Cc09_g05340	GSCOC_T00007113001	Heparanase 3	-4.84658
Cc00_g03160	GSCOC_T00002125001	Probable pectinesterase pectinesterase inhibitor 47	-4.84304
Cc07_g14310	GSCOC_T00036629001	Mechanosensitive ion channel chloroplastic	-4.84304
Cc04_g12780	GSCOC_T00008270001	Uncharacterized protein	-4.83823
Cc07_g20390	GSCOC_T00015690001	Uncharacterized protein	-4.83617
Cc00_g02760	GSCOC_T00006674001	Glutamate receptor	-4.83497
Cc03_g03630	GSCOC_T00026058001	Primary amine oxidase (Fragment)	-4.83426
Cc05_g01140	GSCOC_T00000918001	Uncharacterized protein	-4.82911
Cc00_g07080	GSCOC_T00008957001	Probable LRR receptor-like serine threonine- kinase At3g47570	-4.8258
Cc06_g19020	GSCOC_T00028944001	NADPH-dependent oxidoreductase 2-alkenal reductase	-4.81551
Cc00_g06370	GSCOC_T00004112001	Premnaspirodiene oxygenase	-4.8149
Cc00_g33040	GSCOC_T00002214001	Uncharacterized protein	-4.81424
Cc05_g13610	GSCOC_T00021039001	Cytochrome P450 716B1	-4.80228
Cc08_g12750	GSCOC_T00030436001	Cation H(+) antiporter 15	-4.79481
Cc00_g22300	GSCOC_T00004905001	Dammarenediol II synthase	-4.79452
Cc05_g02700	GSCOC_T00020898001	Vacuolar sorting-associated 8 homolog	-4.78502
Cc07_g05620	GSCOC_T00039840001	7-ethoxycoumarin O-deethylase	-4.77694
Cc04_g11280	GSCOC_T00037298001	Cytochrome P450 71A4	-4.77467
Cc08_g05460	GSCOC_T00024314001	Organic cation carnitine transporter 2	-4.77065
Cc01_g06710	GSCOC_T00030069001	Double-stranded RNA-binding 3	-4.76569
Cc06_g21910	GSCOC_T00015604001	NLP6	-4.76569
Cc06_g04610	GSCOC_T00042973001	Thaumatin 1	-4.76483
Cc04_g06480	GSCOC_T00022435001	Formyltetrahydrofolate deformylase	-4.76124
Cc05_g00480	GSCOC_T00017085001	Nuclear transcription factor Y subunit B-6	-4.75889
Cc07_g11530	GSCOC_T00036991001	Uncharacterized protein	-4.75518
Cc05_g00250	GSCOC_T00017052001	Probable LRR receptor-like serine threonine- kinase At3g47570	-4.74169
Cc02_g34420	GSCOC_T00000684001	Pentatricopeptide repeat-containing mitochondrial	-4.73428
Cc10_g09900	GSCOC_T00031486001	AC transposase	-4.73404
Cc04_g16380	GSCOC_T00035729001	(-)-germacrene D synthase	-4.73327
Cc05_g08900	GSCOC_T00016929001	Uncharacterized protein	-4.72483
Cc00_g04610	GSCOC_T00013608001	Serine threonine- phosphatase 7 long form homolog	-4.72086
Cc05_g02250	GSCOC_T00018428001	Zinc finger CCCH domain-containing 44	-4.70463
Cc10_g05940	GSCOC_T00034734001	Uncharacterized protein	-4.70177
Cc11_g04030	GSCOC_T00034027001	LRR receptor-like serine threonine- kinase GSO1	-4.69711
Cc01_g13930	GSCOC_T00028377001	Uncharacterized protein	-4.69522
Cc02_g10670	GSCOC_T00029504001	Monocopper oxidase SKS2	-4.69522
Cc06_g21870	GSCOC_T00015596001	NLP7	-4.69522
Cc02_g29500	GSCOC_T00018383001	(-)-germacrene D synthase	-4.69477
Cc09_g07920	GSCOC_T00003778001	Glutathione S-transferase U15	-4.69244
Cc00_g24410	GSCOC_T00009805001	Probable LRR receptor-like serine threonine- kinase At3g47570	-4.68795
Cc00_g09960	GSCOC_T00013628001	disease resistance RGA4	-4.68699
Cc00_g31490	GSCOC_T00012790001	Zinc finger NUTCRACKER	-4.67851
Cc00_g29360	GSCOC_T00010479001	Reticuline oxidase	-4.6784
Cc09_g04420	GSCOC_T00017428001	Uncharacterized protein	-4.67363
Cc00_g24170	GSCOC_T00010006001	Wall-associated receptor kinase 5	-4.66895
Cc03_g12990	GSCOC_T00030623001	Uncharacterized protein	-4.66895
Cc11_g05520	GSCOC_T00020510001	Receptor kinase 2	-4.66874
Cc07_g21370	GSCOC_T00016948001	Auxin-induced 5NG4	-4.66649
Cc01_g17020	GSCOC_T00016372001	Uncharacterized protein	-4.66542
Cc02_g24780	GSCOC_T00028842001	Chalcone synthase 9	-4.66542
Cc05_g10270	GSCOC_T00021474001	LRR receptor-like serine threonine- kinase GHR1	-4.66161
Cc09_g08100	GSCOC_T00020742001	disulfide isomerase-like 2-1	-4.6575
Cc07_g21090	GSCOC_T00027220001	Small nuclear ribonucleo Sm D3	-4.65718
Cc00_g19570	GSCOC_T00008845001	Cytochrome P450 76C4	-4.64831
Cc00_g26940	GSCOC_T00000380001	Uncharacterized protein	-4.64831
Cc09_g06390	GSCOC_T00011300001	Senescence-induced receptor-like serine threonine- kinase	-4.64831
Cc06_g21820	GSCOC_T00015581001	NLP7	-4.64557
Cc00_g01810	GSCOC_T00002913001	Uncharacterized protein	-4.63685
Cc00_g29250	GSCOC_T00006495001	Probable copper-transporting ATPase HMA5	-4.63432
Cc04_g16370	GSCOC_T00035727001	Valencene synthase	-4.63127
Cc00_g06670	GSCOC_T00007492001	Bifunctional dihydroflavonol 4-reductase flavanone 4-reductase	-4.62819
Cc02_g14280	GSCOC_T00013835001	GDSL esterase lipase At5g45950	-4.62625
Cc03_g01360	GSCOC_T00025746001	Uncharacterized protein	-4.61696
Cc01_g10090	GSCOC_T00024089001	Lysosomal Pro-X carboxypeptidase	-4.60637
Cc11_g03830	GSCOC_T00033989001	Acetylornithine deacetylase	-4.59336
Cc00_g17710	GSCOC_T00007787001	Alcohol dehydrogenase-like 7	-4.59308
Cc00_g22100	GSCOC_T00007466001	COP9 signalosome complex subunit 7	-4.58496
Cc01_g01510	GSCOC_T00037897001	F-box FBD LRR-repeat At5g22670	-4.57065
Cc00_g26150	GSCOC_T00004175001	BURP domain RD22	-4.57056
Cc00_g30540	GSCOC_T00011249001	Late blight resistance R1-A	-4.5663
Cc01_g19850	GSCOC_T00016004001	Uncharacterized protein	-4.56514
Cc01_g07050	GSCOC_T00030125001	Uncharacterized protein	-4.55673
Cc07_g15600	GSCOC_T00036456001	L-ascorbate oxidase	-4.54045
Cc10_g14520	GSCOC_T00033588001	Uncharacterized protein	-4.53391
Cc00_g07310	GSCOC_T00000204001	Somatic embryogenesis receptor kinase 1	-4.53234
Cc02_g03320	GSCOC_T00020211001	Probable methyltransferase PMT16	-4.52092
Cc01_g18080	GSCOC_T00016247001	Uncharacterized protein	-4.51021
Cc08_g12430	GSCOC_T00030484001	Probable pectinesterase 68	-4.50497
Cc06_g04750	GSCOC_T00042997001	Probable allantoin permease	-4.50071
Cc01_g00450	GSCOC_T00011021001	Uncharacterized protein	-4.49763
Cc11_g09140	GSCOC_T00032777001	Probable S-adenosylmethionine-dependent methyltransferase At5g37990	-4.49532
Cc00_g10210	GSCOC_T00003161001	DNA repair recA homolog mitochondrial	-4.48411
Cc05_g06220	GSCOC_T00042104001	Dynamin-related 1C	-4.48396
Cc02_g04910	GSCOC_T00038982001	Pectinesterase PPME1	-4.48311
Cc02_g03230	GSCOC_T00020199001	Leucine-rich repeat receptor kinase EMS1	-4.48034
Cc02_g14360	GSCOC_T00013843001	Glutamate receptor	-4.47665
Cc09_g08680	GSCOC_T00020845001	UDP-glucose flavonoid 3-O-glucosyltransferase 3	-4.47607
Cc00_g25350	GSCOC_T00007286001	60S ribosomal L4	-4.47243
Cc10_g11830	GSCOC_T00031860001	Uncharacterized protein	-4.46597
Cc10_g05350	GSCOC_T00034820001	Isoflavone 2 -hydroxylase	-4.43864
Cc00_g23640	GSCOC_T00008094001	WD repeat domain phosphoinositide-interacting 3	-4.43622
Cc02_g20810	GSCOC_T00014700001	Dehydrodolichyl diphosphate synthase complex subunit NUS1	-4.43476
Cc03_g10510	GSCOC_T00031070001	MDIS1-interacting receptor like kinase 2	-4.43447
Cc02_g31590	GSCOC_T00027529001	sym-1	-4.43279
Cc11_g05320	GSCOC_T00020478001	G-type lectin S-receptor-like serine threonine- kinase SD2-5	-4.42948
Cc00_g09470	GSCOC_T00008035001	Dolichyl-diphosphooligosaccharide-- glycosyltransferase subunit STT3A	-4.42756
Cc00_g28460	GSCOC_T00008180001	Uncharacterized protein	-4.41794
Cc11_g10350	GSCOC_T00032589001	Uncharacterized protein	-4.41704
Cc02_g31390	GSCOC_T00027575001	Cysteine synthase	-4.39033
Cc00_g09620	GSCOC_T00007388001	late blight resistance homolog R1B-17	-4.38983
Cc03_g08600	GSCOC_T00033288001	MDIS1-interacting receptor like kinase 2	-4.37661
Cc02_g25910	GSCOC_T00028682001	Uncharacterized protein	-4.37476
Cc04_g12850	GSCOC_T00003259001	Ubiquitin-40S ribosomal S27a-1	-4.36811
Cc06_g05430	GSCOC_T00043093001	ABC transporter G family member 39	-4.36692
Cc04_g14660	GSCOC_T00040726001	ribonuclease H At1g65750	-4.36606
Cc10_g09970	GSCOC_T00031477001	Glutathione transferase GST 23	-4.36455
Cc06_g23160	GSCOC_T00040611001	Probable disease resistance At1g58390	-4.35305
Cc06_g22610	GSCOC_T00011692001	Cyanidin-3-O-glucoside 2-O-glucuronosyltransferase	-4.34782
Cc08_g10260	GSCOC_T00026989001	Probable leucine-rich repeat receptor kinase At5g63930	-4.33892
Cc10_g06940	GSCOC_T00034593001	UDP-glycosyltransferase 85A2	-4.33211
Cc07_g08460	GSCOC_T00040220001	DETOXIFICATION 6	-4.31911
Cc00_g30580	GSCOC_T00005597001	Disease resistance RGA2	-4.31769
Cc00_g20840	GSCOC_T00003232001	Probable LRR receptor-like serine threonine- kinase At3g47570	-4.31531
Cc01_g08090	GSCOC_T00015498001	Uncharacterized protein	-4.3114
Cc04_g00330	GSCOC_T00021637001	Calcium-transporting ATPase plasma membrane-type	-4.30726
Cc01_g02580	GSCOC_T00009678001	Uncharacterized protein	-4.30215
Cc01_g01120	GSCOC_T00037981001	UDP-glycosyltransferase 85A3	-4.29631
Cc02_g31220	GSCOC_T00027599001	Serine arginine-rich-splicing factor SR34	-4.28346
Cc00_g07740	GSCOC_T00003351001	Uncharacterized protein	-4.28219
Cc03_g13490	GSCOC_T00018978001	G-type lectin S-receptor-like serine threonine- kinase At5g24080	-4.27747
Cc02_g18410	GSCOC_T00014384001	Methylthioribose kinase	-4.27314
Cc09_g10030	GSCOC_T00041099001	Quinone oxidoreductase PIG3	-4.27093
Cc00_g10320	GSCOC_T00008233001	ASPARTIC PROTEASE IN GUARD CELL 1	-4.26553
Cc07_g06520	GSCOC_T00039962001	Uncharacterized protein	-4.26194
Cc07_g00150	GSCOC_T00019078001	Glycerol-3-phosphate dehydrogenas	-4.26037
Cc01_g18410	GSCOC_T00016208001	Hyoscyamine 6-dioxygenase	-4.25924
Cc11_g05340	GSCOC_T00020480001	UDP-glycosyltransferase 74E1	-4.25571
Cc03_g12730	GSCOC_T00015164001	Auxin response factor 18	-4.25126
Cc08_g11900	GSCOC_T00030557001	Oleosin 16 kDa	-4.24326
Cc05_g04660	GSCOC_T00007006001	Uncharacterized protein	-4.24148
Cc00_g31510	GSCOC_T00011616001	cysteine-rich receptor kinase 35	-4.21027
Cc00_g21480	GSCOC_T00011324001	Receptor kinase	-4.20145
Cc11_g06520	GSCOC_T00020669001	LRR receptor-like serine threonine- kinase ERL1	-4.19755
Cc00_g34990	GSCOC_T00007870001	Cysteine synthase	-4.18873
Cc03_g08370	GSCOC_T00033249001	Magnesium transporter NIPA2	-4.18662
Cc02_g31160	GSCOC_T00027611001	Acyltransferase chloroplastic	-4.18023
Cc01_g06180	GSCOC_T00027456001	Ubiquitin-conjugating enzyme E2 19	-4.17074
Cc02_g09240	GSCOC_T00029683001	Uncharacterized protein	-4.16476
Cc00_g06700	GSCOC_T00007497001	Dihydroflavonol 4-reductase	-4.14569
Cc02_g15160	GSCOC_T00013953001	CBL-interacting kinase 5	-4.14128
Cc02_g28700	GSCOC_T00009464001	Cell number regulator 10	-4.14079
Cc02_g00550	GSCOC_T00019839001	ABC transporter B family member 19	-4.13779
Cc05_g00210	GSCOC_T00017046001	Glutamate receptor	-4.12593
Cc05_g06210	GSCOC_T00042103001	Dynamin-related 1E	-4.12536
Cc02_g27010	GSCOC_T00025014001	Probable nucleoredoxin 1	-4.12535
Cc10_g07230	GSCOC_T00034550001	Synaptonemal complex 1	-4.10799
Cc01_g13560	GSCOC_T00028326001	Copper transporter 6	-4.10544
Cc02_g39060	GSCOC_T00027770001	Serine threonine- kinase 38	-4.09839
Cc03_g04680	GSCOC_T00026195001	Probable disease resistance At1g58390	-4.09476
Cc01_g09240	GSCOC_T00023971001	Serine carboxypeptidase-like 2	-4.09429
Cc00_g12640	GSCOC_T00005842001	B3 domain-containing Os04g0386900	-4.08963
Cc05_g00670	GSCOC_T00017110001	Uncharacterized protein	-4.08643
Cc00_g35560	GSCOC_T00003643001	Uncharacterized protein	-4.07265
Cc01_g06190	GSCOC_T00027457001	Probable LRR receptor-like serine threonine- kinase At5g63710	-4.07177
Cc00_g01720	GSCOC_T00002825001	Uncharacterized protein	-4.07134
Cc00_g18660	GSCOC_T00013355001	Uncharacterized protein	-4.07116
Cc06_g11460	GSCOC_T00041657001	Uncharacterized protein	-4.07085
Cc07_g14660	GSCOC_T00036583001	WEB family chloroplastic	-4.0699
Cc07_g00070	GSCOC_T00019069001	Uridine kinase 5	-4.06621
Cc07_g20190	GSCOC_T00016978001	Uncharacterized protein	-4.05748
Cc06_g07530	GSCOC_T00031250001	Probable flavin-containing monooxygenase 1	-4.05692
Cc09_g03170	GSCOC_T00017582001	Uncharacterized protein	-4.04877
Cc06_g02820	GSCOC_T00023545001	Uncharacterized protein	-4.04458
Cc03_g14880	GSCOC_T00026734001	UDP-glycosyltransferase 71C2	-4.04453
Cc00_g11870	GSCOC_T00001475001	Cytochrome P450 87A3	-4.03483
Cc02_g10510	GSCOC_T00029522001	Non-symbiotic hemoglobin 2	-4.02743
Cc04_g13420	GSCOC_T00018291001	UDP-glycosyltransferase 74B1	-4.02022
Cc07_g13630	GSCOC_T00036713001	Rhamnogalacturonate lyase	-4.01293
Cc02_g31430	GSCOC_T00027565001	Vinorine synthase	-4.00882
Cc07_g05630	GSCOC_T00039841001	7-ethoxycoumarin O-deethylase	-4.00626
Cc06_g20540	GSCOC_T00022994001	LOB domain-containing 22	-3.98447
Cc04_g02930	GSCOC_T00021977001	NRT1 PTR FAMILY	-3.97763
Cc08_g11410	GSCOC_T00027142001	Expansin-like B1	-3.9751
Cc00_g15750	GSCOC_T00000083001	Small ubiquitin-related modifier 2	-3.97243
Cc00_g14670	GSCOC_T00013421001	Flavonoid 3 -monooxygenase	-3.9626
Cc04_g15210	GSCOC_T00006569001	GIGANTEA	-3.94928
Cc03_g09950	GSCOC_T00030988001	Probable aldo-keto reductase 2	-3.94864
Cc06_g05070	GSCOC_T00043039001	Cytochrome P450 76A2	-3.94644
Cc11_g00790	GSCOC_T00019754001	Leucine-rich repeat receptor-like serine threonine- kinase At1g17230	-3.93856
Cc00_g18530	GSCOC_T00008822001	Cytochrome P450 71A2	-3.93497
Cc02_g28740	GSCOC_T00018161001	disease resistance At3g14460	-3.9292
Cc00_g29160	GSCOC_T00009139001	Uncharacterized protein	-3.92538
Cc08_g10170	GSCOC_T00026978001	LRR receptor-like serine threonine- kinase FLS2	-3.92276
Cc11_g03930	GSCOC_T00034002001	ABHD4	-3.92185
Cc08_g13330	GSCOC_T00030356001	Probable LRR receptor-like serine threonine- kinase At3g47570	-3.92011
Cc03_g10910	GSCOC_T00042031001	Cytochrome P450 71A2	-3.91925
Cc11_g02030	GSCOC_T00033037001	Uncharacterized protein	-3.90975
Cc03_g13800	GSCOC_T00031735001	Disease resistance At4g27190	-3.90476
Cc00_g33620	GSCOC_T00005757001	LRR receptor-like serine threonine- kinase EFR	-3.90436
Cc03_g10920	GSCOC_T00042034001	Cytochrome P450 71A2	-3.90008
Cc11_g07660	GSCOC_T00018021001	late blight resistance homolog R1B-17	-3.88859
Cc07_g16640	GSCOC_T00037537001	Probable LRR receptor-like serine threonine- kinase At2g16250	-3.88001
Cc02_g33320	GSCOC_T00015359001	Probable linoleate 9S-lipoxygenase 5	-3.87649
Cc10_g11070	GSCOC_T00016674001	Flavonol synthase flavanone 3-hydroxylase	-3.87202
Cc00_g17620	GSCOC_T00012044001	Nudix hydrolase 2	-3.87129
Cc08_g07750	GSCOC_T00011866001	Uncharacterized protein	-3.86863
Cc00_g10900	GSCOC_T00001638001	Oligopeptide transporter 4	-3.86799
Cc00_g28770	GSCOC_T00004513001	Homocysteine S-methyltransferase 2	-3.86546
Cc08_g05350	GSCOC_T00024295001	ROOT HAIR DEFECTIVE 3	-3.8605
Cc00_g19080	GSCOC_T00000779001	U11 U12 small nuclear ribonucleo 35 kDa	-3.84859
Cc03_g00100	GSCOC_T00025584001	Uncharacterized protein	-3.82963
Cc05_g04680	GSCOC_T00007009001	L-ascorbate oxidase homolog	-3.82405
Cc09_g10020	GSCOC_T00041100001	Quinone oxidoreductase PIG3	-3.82318
Cc01_g08910	GSCOC_T00023929001	Uncharacterized protein	-3.81951
Cc03_g13280	GSCOC_T00018943001	Probable LRR receptor-like serine threonine- kinase At3g47570	-3.81914
Cc05_g08870	GSCOC_T00016926001	Secologanin synthase	-3.80569
Cc08_g10040	GSCOC_T00026962001	Uncharacterized protein	-3.80247
Cc02_g16440	GSCOC_T00014134001	amidase	-3.79759
Cc11_g04610	GSCOC_T00004819001	Momilactone A synthase	-3.7924
Cc06_g18070	GSCOC_T00040407001	MDIS1-interacting receptor like kinase 2	-3.78989
Cc11_g06320	GSCOC_T00020642001	late blight resistance homolog R1B-14	-3.78638
Cc09_g06600	GSCOC_T00005113001	Sister chromatid cohesion PDS5	-3.77745
Cc07_g17730	GSCOC_T00018859001	G-type lectin S-receptor-like serine threonine- kinase RLK1	-3.77462
Cc05_g09460	GSCOC_T00021583001	Leucine-rich repeat soc-2 homolog	-3.77216
Cc06_g20890	GSCOC_T00015853001	Dihydroneopterin aldolase	-3.76786
Cc02_g03550	GSCOC_T00020242001	Peroxidase 66	-3.76614
Cc07_g05950	GSCOC_T00039884001	Multidrug and toxin extrusion 1	-3.75141
Cc02_g29610	GSCOC_T00007811001	Small nuclear ribonucleo F	-3.74173
Cc04_g13370	GSCOC_T00018298001	Uncharacterized protein	-3.74116
Cc09_g05550	GSCOC_T00033449001	Probable LRR receptor-like serine threonine- kinase At3g47570	-3.73639
Cc01_g20760	GSCOC_T00005063001	Uncharacterized protein	-3.72476
Cc03_g09720	GSCOC_T00030959001	Probable aldo-keto reductase 2	-3.71744
Cc04_g14870	GSCOC_T00040771001	Uncharacterized protein	-3.71688
Cc08_g08890	GSCOC_T00017226001	BURP domain-containing 3	-3.71493
Cc04_g05820	GSCOC_T00022349001	Floricaula	-3.70399
Cc09_g08960	GSCOC_T00023131001	Probable carboxylesterase 5	-3.70343
Cc06_g16940	GSCOC_T00004150001	Uncharacterized protein	-3.69984
Cc11_g06500	GSCOC_T00020666001	Receptor 12	-3.69124
Cc09_g07980	GSCOC_T00003788001	Signal recognition particle subunit SRP68	-3.68735
Cc04_g11350	GSCOC_T00037306001	Manganese-dependent ADP-ribose CDP-alcohol diphosphatase	-3.68632
Cc10_g16070	GSCOC_T00033817001	Uncharacterized protein	-3.68431
Cc00_g00330	GSCOC_T00036114001	Flavin-containing monooxygenase FMO GS-OX-like 5	-3.68397
Cc03_g02920	GSCOC_T00025964001	chloroplastic	-3.68033
Cc11_g06180	GSCOC_T00020617001	ankyrin repeat RF_0381	-3.68016
Cc04_g12510	GSCOC_T00005314001	Disease resistance response 206	-3.67803
Cc00_g12460	GSCOC_T00005353001	Deacetoxyvindoline 4-hydroxylase	-3.67485
Cc03_g14050	GSCOC_T00031788001	Probable LRR receptor-like serine threonine- kinase At3g47570	-3.67218
Cc04_g06890	GSCOC_T00022490001	Probable non-specific lipid-transfer AKCS9	-3.67026
Cc10_g13870	GSCOC_T00035226001	Probable LRR receptor-like serine threonine- kinase At2g16250	-3.66734
Cc07_g16260	GSCOC_T00037585001	F-box kelch-repeat SKIP6	-3.66259
Cc02_g22930	GSCOC_T00014971001	Uncharacterized protein	-3.65594
Cc02_g28650	GSCOC_T00009455001	disease resistance At3g14460	-3.65381
Cc00_g20660	GSCOC_T00008222001	MDIS1-interacting receptor like kinase 2	-3.65102
Cc06_g16930	GSCOC_T00004149001	Nuclear transcription factor Y subunit A-7	-3.63815
Cc11_g06830	GSCOC_T00020711001	Receptor 12	-3.63758
Cc00_g23230	GSCOC_T00010051001	Beta-glucosidase 11	-3.62359
Cc00_g09910	GSCOC_T00013000001	1-deoxy-D-xylulose 5-phosphate chloroplastic	-3.62213
Cc10_g04090	GSCOC_T00034979001	Glutamate receptor	-3.62091
Cc09_g06900	GSCOC_T00005151001	LRR receptor-like serine threonine- kinase GSO1	-3.62079
Cc04_g04350	GSCOC_T00022159001	Blue copper	-3.61793
Cc03_g13350	GSCOC_T00018951001	Probable LRR receptor-like serine threonine- kinase At3g47570	-3.61776
Cc05_g04470	GSCOC_T00031674001	CDGSH iron-sulfur domain-containing 2A	-3.61775
Cc01_g21220	GSCOC_T00005006001	Histone H1	-3.61413
Cc03_g14850	GSCOC_T00026728001	disease resistance RGA4	-3.60721
Cc07_g04130	GSCOC_T00039664001	UDP-glycosyltransferase 83A1	-3.6064
Cc08_g08620	GSCOC_T00009064001	Sacsin	-3.604
Cc07_g08110	GSCOC_T00040174001	Transcription factor bHLH83	-3.60015
Cc04_g04770	GSCOC_T00022213001	UPF0481 At3g02645	-3.59757
Cc03_g13780	GSCOC_T00031733001	Uncharacterized protein	-3.59596
Cc06_g22660	GSCOC_T00040687001	SCARECROW	-3.59592
Cc09_g03320	GSCOC_T00017564001	Uncharacterized protein	-3.58622
Cc08_g09450	GSCOC_T00026884001	UPF0481 At3g02645	-3.56918
Cc00_g19890	GSCOC_T00007587001	Transcription factor RAX3	-3.56688
Cc07_g20560	GSCOC_T00015723001	Aquaporin TIP4-1	-3.56364
Cc11_g01590	GSCOC_T00019544001	Uncharacterized protein	-3.56364
Cc10_g05340	GSCOC_T00034821001	Isoflavone 2 -hydroxylase	-3.5603
Cc00_g15060	GSCOC_T00008516001	Sec14 cytosolic factor	-3.54886
Cc08_g11890	GSCOC_T00030559001	Oleosin 16 kDa	-3.52906
Cc02_g19990	GSCOC_T00014579001	Uncharacterized protein	-3.51877
Cc01_g20560	GSCOC_T00015918001	Wee1 kinase	-3.51745
Cc01_g19550	GSCOC_T00016044001	Uncharacterized protein	-3.49533
Cc06_g02140	GSCOC_T00023458001	Methyltransferase N6AMT1	-3.49509
Cc02_g12010	GSCOC_T00029343001	G-type lectin S-receptor-like serine threonine- kinase SD1-1	-3.49333
Cc02_g02940	GSCOC_T00020164001	O-glucosyltransferase rumi homolog	-3.49084
Cc10_g03670	GSCOC_T00024900001	B3 domain-containing REM16	-3.48771
Cc02_g02390	GSCOC_T00020093001	UDP-N-acetylmuramate--L-alanine ligase	-3.47693
Cc07_g11250	GSCOC_T00037023001	Uncharacterized protein	-3.47579
Cc07_g14950	GSCOC_T00036549001	UDP-glycosyltransferase 85A3	-3.4679
Cc03_g04730	GSCOC_T00026201001	Probable disease resistance At1g58390	-3.46297
Cc07_g05000	GSCOC_T00039761001	GAMETE EXPRESSED 3	-3.45536
Cc06_g06050	GSCOC_T00043176001	Uncharacterized protein	-3.45229
Cc07_g09110	GSCOC_T00040307001	Anthocyanidin 3-O-glucosyltransferase 5	-3.45089
Cc00_g32650	GSCOC_T00003357001	Probable pectate lyase 15	-3.44816
Cc10_g10030	GSCOC_T00031465001	Anthocyanidin	-3.44811
Cc05_g02440	GSCOC_T00020969001	Disease resistance RFL1	-3.44501
Cc11_g06510	GSCOC_T00020667001	Uncharacterized protein	-3.44345
Cc00_g20030	GSCOC_T00008216001	Uncharacterized protein	-3.44192
Cc06_g06040	GSCOC_T00043175001	1-aminocyclopropane-1-carboxylate oxidase homolog 1	-3.43917
Cc01_g13550	GSCOC_T00028324001	Copper transporter 1	-3.43302
Cc05_g02210	GSCOC_T00018421001	Disease resistance RPS2	-3.4314
Cc02_g37480	GSCOC_T00027984001	Uncharacterized protein	-3.42384
Cc00_g07940	GSCOC_T00006637001	Uncharacterized protein	-3.40788
Cc08_g05070	GSCOC_T00042452001	Uncharacterized protein	-3.4072
Cc00_g25780	GSCOC_T00004632001	Uncharacterized protein	-3.39153
Cc03_g03610	GSCOC_T00026054001	Polyamine aminopropyltransferase	-3.38047
Cc06_g17260	GSCOC_T00036361001	Cell division cycle 48 homolog	-3.37963
Cc01_g18550	GSCOC_T00016191001	Transcriptional regulator SUPERMAN	-3.37723
Cc04_g16460	GSCOC_T00035747001	Cytosolic sulfotransferase 5	-3.37594
Cc10_g11230	GSCOC_T00018469001	late blight resistance homolog R1A-6	-3.37325
Cc09_g10700	GSCOC_T00041014001	Uncharacterized protein	-3.3674
Cc07_g02360	GSCOC_T00039423001	RING-H2 finger ATL47	-3.36573
Cc00_g28310	GSCOC_T00005346001	disease resistance RGA1	-3.36348
Cc08_g08730	GSCOC_T00006910001	Probable LRR receptor-like serine threonine- kinase At3g47570	-3.36019
Cc02_g10520	GSCOC_T00029521001	Non-symbiotic hemoglobin 2	-3.35947
Cc00_g23360	GSCOC_T00005371001	Small nuclear ribonucleo Sm D3	-3.35537
Cc00_g16450	GSCOC_T00005630001	RNA-binding 42	-3.35376
Cc04_g17040	GSCOC_T00035826001	Pectinesterase 1	-3.35291
Cc00_g33540	GSCOC_T00008896001	Beta-glucosidase 24	-3.35276
Cc01_g04570	GSCOC_T00041187001	Uncharacterized protein	-3.35078
Cc04_g03290	GSCOC_T00022022001	Acid phosphatase 1	-3.34584
Cc09_g06240	GSCOC_T00033339001	Furcatin hydrolase	-3.34484
Cc02_g20700	GSCOC_T00014688001	MADS-box transcription factor 27	-3.33636
Cc01_g00940	GSCOC_T00038008001	Uncharacterized protein	-3.33487
Cc02_g33840	GSCOC_T00008628001	Dolichol-phosphate mannosyltransferase subunit 1	-3.33394
Cc07_g09980	GSCOC_T00037175001	Disease resistance RPP13 4	-3.32152
Cc08_g14790	GSCOC_T00035388001	Transcription factor GLABRA 3	-3.31989
Cc00_g21530	GSCOC_T00007649001	G-type lectin S-receptor-like serine threonine- kinase RLK1	-3.31401
Cc07_g17940	GSCOC_T00018827001	pentatricopeptide repeat-containing At3g49142	-3.3137
Cc05_g06150	GSCOC_T00042094001	Uncharacterized protein	-3.31306
Cc09_g07830	GSCOC_T00003767001	3-ketoacyl- synthase 19	-3.31244
Cc10_g02600	GSCOC_T00024765001	Mannan endo-	-3.31129
Cc10_g05460	GSCOC_T00034803001	Snakin-1	-3.3038
Cc00_g00740	GSCOC_T00036186001	NADPH-dependent oxidoreductase 2-alkenal reductase	-3.3018
Cc07_g13940	GSCOC_T00036675001	UDP-rhamnose:rhamnosyltransferase 1	-3.30025
Cc06_g20630	GSCOC_T00023011001	Importin subunit alpha-1a	-3.29514
Cc07_g17760	GSCOC_T00018853001	G-type lectin S-receptor-like serine threonine- kinase RLK1	-3.28778
Cc11_g17430	GSCOC_T00038314001	Pyruvate dehydrogenase E1 component subunit beta- mitochondrial	-3.28695
Cc04_g11080	GSCOC_T00037268001	Non-specific lipid-transfer	-3.28687
Cc04_g04570	GSCOC_T00022186001	Uncharacterized protein	-3.28668
Cc06_g18780	GSCOC_T00028906001	Mitochondrial fission 1	-3.2848
Cc02_g29490	GSCOC_T00018382001	(-)-germacrene D synthase	-3.2823
Cc01_g01420	GSCOC_T00037910001	F-box FBD LRR-repeat At1g16930	-3.27851
Cc08_g14580	GSCOC_T00030204001	Multiple C2 and transmembrane domain-containing 1	-3.27706
Cc11_g05580	GSCOC_T00020516001	UDP-glycosyltransferase 83A1	-3.27632
Cc00_g29960	GSCOC_T00012067001	Uncharacterized protein	-3.27588
Cc05_g16100	GSCOC_T00038605001	RING finger B	-3.27255
Cc00_g28570	GSCOC_T00006766001	Uncharacterized protein	-3.27141
Cc03_g06660	GSCOC_T00026478001	UPF0481 At3g47200	-3.26852
Cc06_g08440	GSCOC_T00031132001	Ethylene-responsive transcription factor SHINE 2	-3.26469
Cc00_g11910	GSCOC_T00012631001	Cytochrome P450 87A3	-3.25813
Cc10_g05480	GSCOC_T00034801001	F-box FBW2	-3.2549
Cc06_g06620	GSCOC_T00031361001	E3 ubiquitin- ligase PUB23	-3.2544
Cc11_g04180	GSCOC_T00034056001	Cytosolic sulfotransferase 17	-3.25192
Cc04_g07960	GSCOC_T00022637001	LRR receptor-like serine threonine- kinase GSO2	-3.24751
Cc00_g23880	GSCOC_T00012444001	Serine carboxypeptidase-like 18	-3.23941
Cc07_g08720	GSCOC_T00040260001	Chloroplastic group IIB intron splicing facilitator chloroplastic	-3.23431
Cc09_g08550	GSCOC_T00020825001	Disease susceptibility LOV1	-3.22725
Cc00_g32450	GSCOC_T00010242001	LRR receptor-like serine threonine- kinase EFR	-3.22014
Cc00_g31870	GSCOC_T00001691001	Glutathione transferase GST 23	-3.21347
Cc08_g17140	GSCOC_T00035703001	Uncharacterized protein	-3.21101
Cc06_g17160	GSCOC_T00012663001	MDIS1-interacting receptor like kinase 2	-3.18238
Cc02_g16680	GSCOC_T00014162001	HVA22 g	-3.17913
Cc02_g25350	GSCOC_T00028757001	Ankyrin repeat-containing ITN1	-3.1747
Cc07_g19310	GSCOC_T00018605001	RuvB-like 2	-3.1731
Cc10_g09130	GSCOC_T00034292001	Hydroxysteroid 11-beta-dehydrogenase 1	-3.17152
Cc03_g04460	GSCOC_T00026166001	Major allergen Pru ar 1	-3.16726
Cc07_g17710	GSCOC_T00018861001	G-type lectin S-receptor-like serine threonine- kinase RLK1	-3.1672
Cc01_g19670	GSCOC_T00016028001	Uncharacterized isomerase BH0283	-3.16394
Cc09_g02370	GSCOC_T00017686001	Cytochrome P450 86B1	-3.16114
Cc02_g01300	GSCOC_T00019948001	Uncharacterized protein	-3.1569
Cc02_g28730	GSCOC_T00009469001	disease resistance RPP13 1	-3.15209
Cc05_g16410	GSCOC_T00038564001	54S ribosomal mitochondrial	-3.14554
Cc11_g11710	GSCOC_T00032410001	Floral homeotic APETALA 1	-3.1451
Cc02_g07480	GSCOC_T00029935001	Uncharacterized protein	-3.14327
Cc05_g10150	GSCOC_T00021495001	Probable glutathione S-transferase	-3.14024
Cc06_g21990	GSCOC_T00015614001	NLP8	-3.13676
Cc01_g04240	GSCOC_T00039301001	UDP-glycosyltransferase 92A1	-3.13595
Cc07_g06070	GSCOC_T00039901001	Uncharacterized protein	-3.13571
Cc04_g03500	GSCOC_T00022045001	Probable sulfate transporter	-3.12722
Cc03_g14830	GSCOC_T00026726001	UDP-glycosyltransferase 71C2	-3.1265
Cc08_g08670	GSCOC_T00009069001	Uncharacterized protein	-3.12075
Cc08_g06900	GSCOC_T00025237001	Uncharacterized protein	-3.11747
Cc01_g09530	GSCOC_T00024013001	DNA polymerase epsilon catalytic subunit A	-3.11644
Cc03_g04710	GSCOC_T00026199001	Probable disease resistance At1g58390	-3.11602
Cc06_g15830	GSCOC_T00030771001	Malate cytoplasmic	-3.11588
Cc01_g17760	GSCOC_T00016284001	Subtilisin-like protease	-3.10945
Cc04_g06900	GSCOC_T00022491001	Non-specific lipid-transfer 2	-3.10268
Cc00_g23440	GSCOC_T00007739001	Uncharacterized protein	-3.09871
Cc07_g03320	GSCOC_T00039559001	NAC domain-containing 94	-3.09831
Cc10_g07650	GSCOC_T00034496001	Uncharacterized protein	-3.09389
Cc11_g14370	GSCOC_T00032066001	MLP 423	-3.08954
Cc01_g20620	GSCOC_T00015911001	indole-3-acetic acid-amido synthetase	-3.08751
Cc03_g10530	GSCOC_T00031072001	UDP-glycosyltransferase 92A1	-3.08204
Cc01_g17390	GSCOC_T00016329001	Uncharacterized protein	-3.07187
Cc07_g20940	GSCOC_T00027252001	Uncharacterized protein	-3.06683
Cc01_g14280	GSCOC_T00028424001	serine threonine- kinase CCR3	-3.05942
Cc02_g01630	GSCOC_T00019990001	GDSL esterase lipase At4g10955	-3.05358
Cc11_g07190	GSCOC_T00018089001	Ankyrin repeat-containing ITN1	-3.04967
Cc11_g02900	GSCOC_T00025510001	Disease resistance RPP8 3	-3.04928
Cc06_g15470	GSCOC_T00030819001	Chitinase-3 1	-3.0465
Cc05_g01730	GSCOC_T00015749001	GDSL esterase lipase At1g71250	-3.03774
Cc00_g22690	GSCOC_T00011338001	BURP domain RD22	-3.03717
Cc02_g01580	GSCOC_T00019984001	Calcineurin B 4	-3.02913
Cc02_g32040	GSCOC_T00018912001	Serine threonine- kinase BRI1-like 1	-3.02196
Cc11_g14390	GSCOC_T00032064001	Auxin-induced 5NG4	-3.0215
Cc06_g19200	GSCOC_T00028972001	Vesicular inhibitory amino acid transporter	-3.01671
Cc07_g13570	GSCOC_T00036720001	Geranylgeranyl pyrophosphate chloroplastic	-3.0151
Cc02_g13950	GSCOC_T00029076001	F-box At4g18380	-3.01275
Cc09_g07970	GSCOC_T00003785001	Lysosomal alpha-mannosidase	-3.01177
Cc00_g03970	GSCOC_T00013722001	UTP--glucose-1-phosphate uridylyltransferase 1	-3.00937
Cc06_g15460	GSCOC_T00030820001	Acidic mammalian chitinase	-3.00722
Cc02_g35680	GSCOC_T00042809001	Pleiotropic drug resistance 3	-3.00653
Cc08_g15410	GSCOC_T00035470001	Probable membrane-associated kinase regulator 5	-2.99546
Cc11_g16490	GSCOC_T00038189001	ABC transporter C family member 3	-2.99279
Cc01_g02600	GSCOC_T00009676001	Disease resistance RGA2	-2.98693
Cc08_g10200	GSCOC_T00026981001	Probable LRR receptor-like serine threonine- kinase At3g47570	-2.98515
Cc00_g20000	GSCOC_T00008213001	ABC transporter G family member 8	-2.98315
Cc04_g14440	GSCOC_T00004355001	LRR receptor-like serine threonine- kinase FLS2	-2.97842
Cc00_g04490	GSCOC_T00013587001	Indole-3-acetic acid-amido synthetase	-2.97797
Cc04_g03650	GSCOC_T00022062001	Cyclin-A2-1	-2.97521
Cc02_g19970	GSCOC_T00014577001	Codeine O-demethylase	-2.97499
Cc07_g17530	GSCOC_T00008836001	Probable cinnamyl alcohol dehydrogenase 9	-2.96786
Cc06_g22430	GSCOC_T00005212001	Cytochrome P450 71A1	-2.96229
Cc11_g10770	GSCOC_T00032534001	Piriformospora indica-insensitive 2	-2.96184
Cc00_g35020	GSCOC_T00002415001	Uncharacterized protein	-2.96161
Cc03_g10930	GSCOC_T00042035001	Cytochrome P450 71A2	-2.95696
Cc06_g04660	GSCOC_T00042982001	Uncharacterized protein	-2.95628
Cc08_g02840	GSCOC_T00037776001	2 -deoxymugineic-acid 2 -dioxygenase	-2.95626
Cc06_g07510	GSCOC_T00031252001	Uncharacterized protein	-2.95537
Cc02_g29260	GSCOC_T00004509001	Uncharacterized protein	-2.95262
Cc06_g17020	GSCOC_T00012644001	Receptor 12	-2.95226
Cc02_g12120	GSCOC_T00029330001	Uncharacterized protein	-2.94818
Cc10_g05360	GSCOC_T00034818001	Isoflavone 2 -hydroxylase	-2.94656
Cc08_g12020	GSCOC_T00030539001	Subtilisin-like protease	-2.94043
Cc08_g03920	GSCOC_T00034191001	Cytochrome P450 76C4	-2.93861
Cc00_g06380	GSCOC_T00004113001	Vetispiradiene synthase 1	-2.93771
Cc11_g08080	GSCOC_T00032923001	Myb family transcription factor APL	-2.93464
Cc06_g08540	GSCOC_T00031119001	NADP-dependent alkenal double bond reductase P2	-2.93074
Cc02_g02630	GSCOC_T00020123001	Short-chain dehydrogenase TIC chloroplastic	-2.92842
Cc00_g31860	GSCOC_T00006471001	Uncharacterized protein	-2.92815
Cc10_g14650	GSCOC_T00033609001	Uncharacterized protein	-2.92687
Cc06_g08580	GSCOC_T00031111001	NRT1 PTR FAMILY	-2.92642
Cc06_g15840	GSCOC_T00030768001	germin 2-1	-2.92639
Cc02_g15270	GSCOC_T00013968001	Probable LRR receptor-like serine threonine- kinase At3g47570	-2.92512
Cc00_g28130	GSCOC_T00008593001	Disease resistance RPM1	-2.92256
Cc07_g08120	GSCOC_T00040175001	Acyl- --sterol O-acyltransferase 1	-2.91679
Cc02_g15980	GSCOC_T00014070001	Probable LRR receptor-like serine threonine- kinase At1g53440	-2.91303
Cc00_g11000	GSCOC_T00000138001	Secologanin synthase	-2.90475
Cc00_g12290	GSCOC_T00009516001	S-norcoclaurine synthase	-2.90435
Cc05_g12870	GSCOC_T00021132001	G-type lectin S-receptor-like serine threonine- kinase At4g27290	-2.89994
Cc04_g14500	GSCOC_T00040692001	Ribulose bisphosphate carboxylase oxygenase activase chloroplastic	-2.89815
Cc11_g16130	GSCOC_T00038146001	terminal ear1	-2.89656
Cc08_g00380	GSCOC_T00038529001	Heparanase 3	-2.89437
Cc02_g03090	GSCOC_T00020181001	Branchpoint-bridging	-2.89052
Cc01_g16730	GSCOC_T00016406001	Uncharacterized protein	-2.88775
Cc03_g03890	GSCOC_T00026090001	Uncharacterized protein	-2.88243
Cc06_g06380	GSCOC_T00031390001	Uncharacterized protein	-2.88026
Cc02_g23510	GSCOC_T00015050001	DNA (cytosine-5)-methyltransferase 1A	-2.87551
Cc06_g04320	GSCOC_T00023747001	Uncharacterized protein	-2.87205
Cc02_g30110	GSCOC_T00038965001	F-box FBW2	-2.8696
Cc06_g03980	GSCOC_T00023699001	Phenylalanine ammonia-lyase	-2.86914
Cc03_g15590	GSCOC_T00026848001	UDP-glucose flavonoid 3-O-glucosyltransferase 6	-2.86724
Cc00_g17630	GSCOC_T00002524001	Beta-galactosidase 8	-2.86522
Cc05_g02330	GSCOC_T00001629001	Anthocyanidin 3-O-glucosyltransferase 6 (Fragment)	-2.86481
Cc07_g06720	GSCOC_T00039993001	Sigma factor regulation	-2.86344
Cc03_g06710	GSCOC_T00026488001	UPF0481 At3g47200	-2.86056
Cc04_g04030	GSCOC_T00022120001	Uncharacterized protein	-2.84665
Cc00_g04530	GSCOC_T00013593001	Indole-3-acetic acid-amido synthetase	-2.84444
Cc00_g23830	GSCOC_T00007577001	pentatricopeptide repeat-containing At5g37570	-2.84025
Cc05_g16190	GSCOC_T00038595001	Transcription factor JUNGBRUNNEN 1	-2.83759
Cc00_g29030	GSCOC_T00013515001	Glutathione S-transferase U9	-2.83694
Cc01_g09220	GSCOC_T00023969001	Serine carboxypeptidase-like 2	-2.83609
Cc10_g13450	GSCOC_T00035291001	Uncharacterized protein	-2.83609
Cc01_g03260	GSCOC_T00033141001	Elongation factor P	-2.83445
Cc11_g01470	GSCOC_T00019562001	Pleiotropic drug resistance 1	-2.83355
Cc07_g02110	GSCOC_T00039392001	Dihydroflavonol 4-reductase	-2.83053
Cc02_g14260	GSCOC_T00013833001	GDSL esterase lipase At5g45960	-2.82684
Cc08_g15490	GSCOC_T00035481001	F-box FBD LRR-repeat At3g52680	-2.8244
Cc07_g04220	GSCOC_T00039674001	Serine carboxypeptidase-like 25	-2.81379
Cc11_g01400	GSCOC_T00019571001	Uncharacterized protein	-2.80806
Cc00_g28750	GSCOC_T00009574001	Gibberellin 20 oxidase 1-B	-2.80804
Cc08_g08650	GSCOC_T00009067001	Probable LRR receptor-like serine threonine- kinase At3g47570	-2.8078
Cc05_g03130	GSCOC_T00033505001	Endoglucanase 11	-2.80651
Cc04_g13260	GSCOC_T00018904001	Flavonoid 3 -monooxygenase	-2.806
Cc06_g03300	GSCOC_T00023610001	Nuclear factor related to kappa-B-binding	-2.80502
Cc05_g07580	GSCOC_T00002390001	Uncharacterized membrane	-2.80338
Cc00_g05030	GSCOC_T00000057001	Probably inactive leucine-rich repeat receptor kinase At2g25790	-2.80275
Cc11_g05370	GSCOC_T00020487001	late blight resistance homolog R1B-16	-2.79325
Cc11_g06680	GSCOC_T00020692001	Caffeoyl- O-methyltransferase	-2.79258
Cc07_g17740	GSCOC_T00018858001	G-type lectin S-receptor-like serine threonine- kinase RLK1	-2.78794
Cc01_g16290	GSCOC_T00016459001	Cysteine-rich repeat secretory 55	-2.78631
Cc10_g10160	GSCOC_T00031448001	Dammarenediol II synthase	-2.78061
Cc06_g05540	GSCOC_T00043108001	Cytochrome P450 94A1	-2.77587
Cc00_g10050	GSCOC_T00003814001	Trans-cinnamate 4-monooxygenase	-2.77475
Cc05_g08000	GSCOC_T00016806001	Transcription factor VIP1	-2.77364
Cc10_g04050	GSCOC_T00034984001	Squalene monooxygenase	-2.77196
Cc00_g16690	GSCOC_T00012625001	Gibberellin 3-beta-dioxygenase 4	-2.76975
Cc11_g07600	GSCOC_T00018028001	Uncharacterized protein	-2.76341
Cc05_g10160	GSCOC_T00021494001	Probable glutathione S-transferase parC	-2.75828
Cc03_g10150	GSCOC_T00031018001	REF SRPP At3g05500	-2.75823
Cc08_g10210	GSCOC_T00026982001	Probable LRR receptor-like serine threonine- kinase At3g47570	-2.75666
Cc00_g01610	GSCOC_T00002721001	Succinate dehydrogenase cytochrome b560 subunit	-2.75651
Cc08_g12760	GSCOC_T00030435001	14 kDa proline-rich	-2.74809
Cc00_g11210	GSCOC_T00010562001	MDIS1-interacting receptor like kinase 2	-2.74698
Cc08_g03080	GSCOC_T00037817001	Transcription factor MYB39	-2.74496
Cc11_g06470	GSCOC_T00020663001	Receptor 12	-2.74129
Cc01_g04630	GSCOC_T00041203001	Dihydroflavonol 4-reductase	-2.73819
Cc07_g14900	GSCOC_T00036556001	UDP-glycosyltransferase 85A3	-2.73593
Cc08_g05710	GSCOC_T00024360001	Ubiquitin-60S ribosomal L40	-2.73413
Cc00_g16280	GSCOC_T00011498001	Probable LRR receptor-like serine threonine- kinase At1g53420	-2.7305
Cc11_g17530	GSCOC_T00038328001	Uncharacterized protein	-2.7267
Cc03_g13550	GSCOC_T00018990001	Bifunctional dihydroflavonol 4-reductase flavanone 4-reductase	-2.72213
Cc01_g01280	GSCOC_T00037942001	Zinc finger A20 and AN1 domain-containing stress-associated 7	-2.72177
Cc02_g02290	GSCOC_T00020080001	DNA-directed primase polymerase	-2.71137
Cc06_g06080	GSCOC_T00043179001	Beta- insoluble isoenzyme 1	-2.70398
Cc02_g30080	GSCOC_T00038960001	Uncharacterized protein	-2.70168
Cc06_g21690	GSCOC_T00015561001	Transcription factor bHLH18	-2.69799
Cc11_g00410	GSCOC_T00019481001	Acidic endochitinase	-2.69601
Cc01_g11400	GSCOC_T00024269001	MLO 3	-2.69404
Cc04_g17030	GSCOC_T00035825001	pectinesterase pectinesterase inhibitor 26	-2.6915
Cc01_g19360	GSCOC_T00016067001	Uncharacterized protein	-2.68988
Cc03_g09860	GSCOC_T00030976001	late blight resistance homolog R1A-6	-2.68858
Cc06_g23530	GSCOC_T00040556001	Organic cation carnitine transporter 7	-2.68796
Cc03_g08950	GSCOC_T00042741001	Uncharacterized protein	-2.68768
Cc04_g09230	GSCOC_T00022806001	Pentatricopeptide repeat-containing mitochondrial	-2.68497
Cc10_g03780	GSCOC_T00024915001	Serpin-ZX	-2.68274
Cc10_g15770	GSCOC_T00033771001	Aspartic ase nepenthesin-1	-2.68218
Cc10_g04430	GSCOC_T00034935001	Patatin group A-3	-2.6778
Cc09_g08500	GSCOC_T00020819001	Uncharacterized protein	-2.67589
Cc02_g17760	GSCOC_T00014302001	Uncharacterized protein	-2.6714
Cc08_g11300	GSCOC_T00027129001	Receptor 12	-2.66665
Cc00_g27850	GSCOC_T00009140001	LRR receptor-like serine threonine- kinase EFR	-2.66481
Cc11_g06760	GSCOC_T00020702001	Leucine-rich repeat receptor kinase PXL1	-2.66197
Cc01_g21040	GSCOC_T00005028001	Endoglucanase 17	-2.66137
Cc05_g00500	GSCOC_T00017087001	DETOXIFICATION 41	-2.65898
Cc06_g20580	GSCOC_T00023002001	Inactive ubiquitin carboxyl-terminal hydrolase 54	-2.65797
Cc05_g11700	GSCOC_T00021281001	D-amino-acid chloroplastic	-2.65554
Cc02_g16450	GSCOC_T00014135001	Uncharacterized protein	-2.65216
Cc01_g03080	GSCOC_T00019039001	Auxin-induced 5NG4	-2.64974
Cc05_g11480	GSCOC_T00021310001	Glutamate receptor	-2.64653
Cc05_g08240	GSCOC_T00016842001	Heparanase 3	-2.64601
Cc11_g01090	GSCOC_T00019641001	ASPARTIC PROTEASE IN GUARD CELL 2	-2.64263
Cc02_g10130	GSCOC_T00029562001	Uncharacterized protein At1g03900	-2.64188
Cc00_g21390	GSCOC_T00000218001	Probably inactive leucine-rich repeat receptor kinase At5g48380	-2.64093
Cc08_g00950	GSCOC_T00038447001	Uncharacterized protein	-2.63607
Cc01_g18620	GSCOC_T00016181001	Cytochrome P450 94A2	-2.63586
Cc05_g03500	GSCOC_T00033572001	ASPARTIC PROTEASE IN GUARD CELL 1	-2.63551
Cc02_g09130	GSCOC_T00029699001	SSXT	-2.63387
Cc04_g12810	GSCOC_T00003254001	Cyclic nucleotide-gated ion channel 18	-2.62856
Cc10_g11740	GSCOC_T00031845001	Uncharacterized protein	-2.62713
Cc06_g04640	GSCOC_T00042977001	UDP-glycosyltransferase 73C4	-2.624
Cc06_g16770	GSCOC_T00004128001	Thiol protease SEN102	-2.62357
Cc07_g12370	GSCOC_T00036882001	UPF0548 At2g17695	-2.61852
Cc02_g29930	GSCOC_T00038923001	disease resistance RPP13 1	-2.61406
Cc01_g16720	GSCOC_T00016407001	Uncharacterized protein	-2.60935
Cc10_g03270	GSCOC_T00024850001	Anthocyanidin 3-O-glucosyltransferase 5	-2.60935
Cc10_g16020	GSCOC_T00033809001	Splicing factor 3B subunit 4	-2.60822
Cc11_g06850	GSCOC_T00020715001	Receptor 12	-2.60666
Cc01_g17460	GSCOC_T00016322001	GDSL esterase lipase At4g28780	-2.60545
Cc10_g09400	GSCOC_T00031549001	Immune-associated nucleotide-binding 10	-2.60313
Cc00_g32840	GSCOC_T00000978001	Disease resistance At4g27190	-2.59444
Cc01_g13870	GSCOC_T00028369001	Laccase-4	-2.59167
Cc09_g07000	GSCOC_T00036333001	Theobromine synthase 2	-2.59089
Cc02_g14370	GSCOC_T00013845001	Uncharacterized protein	-2.58921
Cc11_g01390	GSCOC_T00019572001	Uncharacterized protein	-2.58743
Cc09_g04300	GSCOC_T00017443001	NADP-dependent alkenal double bond reductase P2	-2.58438
Cc00_g13470	GSCOC_T00010147001	Uncharacterized protein	-2.58084
Cc02_g01590	GSCOC_T00019985001	Calcineurin B 7	-2.58054
Cc11_g15480	GSCOC_T00038059001	High affinity nitrate transporter	-2.5802
Cc03_g14380	GSCOC_T00026648001	Polygalacturonase At1g48100	-2.57752
Cc09_g10490	GSCOC_T00041038001	Lysine histidine transporter-like 7	-2.57396
Cc02_g16500	GSCOC_T00014143001	Uncharacterized protein	-2.57361
Cc02_g25420	GSCOC_T00028748001	Cytochrome P450 734A1	-2.57348
Cc00_g25530	GSCOC_T00008670001	L-ascorbate oxidase homolog	-2.57217
Cc08_g05060	GSCOC_T00042453001	Uncharacterized protein	-2.57174
Cc01_g10780	GSCOC_T00024185001	ABC transporter G family member 28	-2.5698
Cc07_g18570	GSCOC_T00018734001	Ent-kaur-16-ene chloroplastic	-2.56913
Cc01_g12310	GSCOC_T00028162001	Beta-Amyrin Synthase 2	-2.55557
Cc00_g25520	GSCOC_T00008669001	Uncharacterized protein	-2.55528
Cc00_g18430	GSCOC_T00005203001	Alcohol dehydrogenase-like 3	-2.55216
Cc03_g10010	GSCOC_T00031000001	Rho GDP-dissociation inhibitor	-2.55062
Cc00_g28960	GSCOC_T00002176001	Cytochrome P450 71A8	-2.55028
Cc05_g03610	GSCOC_T00017366001	cellulose synthase H3	-2.54206
Cc00_g31720	GSCOC_T00009492001	GDSL esterase lipase 1	-2.54155
Cc10_g03650	GSCOC_T00024897001	Cytochrome P450 82A3	-2.53912
Cc09_g09740	GSCOC_T00004105001	Ankyrin-1	-2.53484
Cc06_g20320	GSCOC_T00022954001	nuclease HARBI1	-2.53299
Cc05_g04860	GSCOC_T00035023001	Sigma intracellular receptor 2	-2.52633
Cc01_g11080	GSCOC_T00024226001	Transcription initiation factor TFIID subunit 9	-2.52608
Cc05_g08850	GSCOC_T00016920001	Secologanin synthase	-2.52404
Cc00_g10140	GSCOC_T00000008001	Uncharacterized protein	-2.51695
Cc02_g02990	GSCOC_T00020169001	Uncharacterized protein	-2.51613
Cc03_g16270	GSCOC_T00002100001	Uncharacterized protein	-2.51135
Cc02_g11990	GSCOC_T00029345001	G-type lectin S-receptor-like serine threonine- kinase B120	-2.51031
Cc07_g03690	GSCOC_T00039613001	Transmembrane 230	-2.50869
Cc03_g08140	GSCOC_T00033206001	Reticulon B13	-2.50847
Cc02_g14590	GSCOC_T00013872001	GDSL esterase lipase At5g45910	-2.50781
Cc11_g07740	GSCOC_T00018010001	SEC14 cytosolic factor	-2.50757
Cc05_g13960	GSCOC_T00020993001	homolog 5	-2.50627
Cc00_g07490	GSCOC_T00008327001	Ubiquitin carboxyl-terminal hydrolase 13	-2.50024
Cc00_g35110	GSCOC_T00008391001	MDIS1-interacting receptor like kinase 1	-2.49943
Cc08_g07150	GSCOC_T00025318001	Early nodulin 3	-2.49705
Cc05_g14500	GSCOC_T00038810001	Sodium hydrogen exchanger 4	-2.49665
Cc04_g04170	GSCOC_T00022137001	Uncharacterized protein At2g34160	-2.49028
Cc03_g09900	GSCOC_T00030980001	Probable aldo-keto reductase 2	-2.48907
Cc00_g10240	GSCOC_T00006744001	Uncharacterized protein	-2.48881
Cc04_g10800	GSCOC_T00042652001	multidrug resistance	-2.48709
Cc02_g15400	GSCOC_T00013986001	Probable LRR receptor-like serine threonine- kinase At5g45780	-2.48598
Cc03_g05490	GSCOC_T00026306001	Probable disease resistance RXW24L	-2.48466
Cc06_g16170	GSCOC_T00030727001	Probable disease resistance RPP8 2	-2.47976
Cc06_g20380	GSCOC_T00022967001	Flavonol synthase flavanone 3-hydroxylase	-2.47312
Cc02_g12250	GSCOC_T00029308001	Equilibrative nucleoside transporter 4	-2.47144
Cc00_g02080	GSCOC_T00001841001	disease resistance At1g63350	-2.47086
Cc10_g01310	GSCOC_T00024601001	Probable cinnamyl alcohol dehydrogenase 6	-2.47058
Cc00_g12680	GSCOC_T00005848001	Glutathione transferase GST 23	-2.46993
Cc03_g12360	GSCOC_T00015229001	Uncharacterized CRM domain-containing chloroplastic	-2.46624
Cc02_g12020	GSCOC_T00029340001	Receptor-like serine threonine- kinase SD1-8	-2.46095
Cc07_g03350	GSCOC_T00039562001	Myb-related 306	-2.46093
Cc04_g13950	GSCOC_T00035912001	Disease resistance RPP8	-2.45777
Cc07_g05480	GSCOC_T00039821001	B3 domain-containing REM10	-2.45404
Cc02_g29760	GSCOC_T00038877001	disease resistance RGA3	-2.4535
Cc10_g09100	GSCOC_T00034296001	LRR receptor-like serine threonine- kinase GSO1	-2.45297
Cc11_g01710	GSCOC_T00019529001	Probable boron transporter 6	-2.45266
Cc11_g07610	GSCOC_T00018027001	Cytochrome P450 716B2	-2.45036
Cc06_g19030	GSCOC_T00028945001	NADPH-dependent oxidoreductase 2-alkenal reductase	-2.44825
Cc02_g14920	GSCOC_T00013918001	Endoribonuclease Dicer homolog 2	-2.44133
Cc06_g23890	GSCOC_T00040501001	Receptor 12	-2.43536
Cc05_g13320	GSCOC_T00021077001	Pectinesterase	-2.43404
Cc03_g01420	GSCOC_T00025754001	Uncharacterized protein	-2.43091
Cc02_g02240	GSCOC_T00020073001	Probable WRKY transcription factor 27	-2.43082
Cc08_g09070	GSCOC_T00017247001	Alcohol dehydrogenase class-3	-2.42831
Cc03_g08520	GSCOC_T00033273001	late blight resistance homolog R1B-14	-2.4255
Cc10_g11750	GSCOC_T00031846001	Laccase-13	-2.42513
Cc04_g08080	GSCOC_T00022656001	Tropinone reductase homolog At1g07440	-2.42291
Cc05_g03540	GSCOC_T00033578001	Cysteine-rich receptor kinase 25	-2.4212
Cc00_g35100	GSCOC_T00004229001	Ent-kaur-16-ene chloroplastic	-2.42039
Cc06_g00650	GSCOC_T00023252001	D-alanine--D-alanine ligase A	-2.41866
Cc06_g14740	GSCOC_T00041218001	Uncharacterized protein	-2.41778
Cc04_g02940	GSCOC_T00021978001	NRT1 PTR FAMILY	-2.41634
Cc00_g14100	GSCOC_T00000560001	Probable LRR receptor-like serine threonine- kinase At3g47570	-2.41175
Cc04_g09960	GSCOC_T00042530001	WD repeat-containing 18	-2.41001
Cc00_g29180	GSCOC_T00000484001	Probable LRR receptor-like serine threonine- kinase At3g47570	-2.4081
Cc11_g02810	GSCOC_T00025526001	Flotillin 1	-2.40693
Cc08_g15170	GSCOC_T00035443001	Heat shock 83	-2.40631
Cc00_g11020	GSCOC_T00000140001	Secologanin synthase	-2.40523
Cc03_g02370	GSCOC_T00025879001	Uncharacterized protein	-2.40164
Cc00_g13280	GSCOC_T00009821001	Disease resistance At4g27190	-2.40159
Cc11_g08430	GSCOC_T00032876001	Uncharacterized protein	-2.40079
Cc00_g26490	GSCOC_T00004431001	Uncharacterized protein	-2.39867
Cc03_g01290	GSCOC_T00025735001	Major allergen Pru ar 1	-2.39776
Cc02_g15050	GSCOC_T00013937001	Probable serine threonine- kinase drkA	-2.39729
Cc01_g13000	GSCOC_T00028257001	Xyloglucan galactosyltransferase KATAMARI1 homolog	-2.39454
Cc10_g06890	GSCOC_T00034600001	UDP-glycosyltransferase 85A2	-2.39445
Cc03_g05340	GSCOC_T00026283001	Deacetoxyvindoline 4-hydroxylase	-2.39361
Cc05_g03550	GSCOC_T00033579001	Cysteine-rich receptor kinase 10	-2.39057
Cc06_g16300	GSCOC_T00030712001	Polygalacturonase inhibitor	-2.38687
Cc07_g08060	GSCOC_T00040168001	Proteasome subunit beta type-5	-2.38424
Cc00_g24680	GSCOC_T00012726001	Bidirectional sugar transporter SWEET10	-2.38303
Cc06_g05750	GSCOC_T00043140001	Heparanase 3	-2.38033
Cc00_g05090	GSCOC_T00002393001	Receptor CLAVATA2	-2.38014
Cc00_g10980	GSCOC_T00000136001	Secologanin synthase	-2.37966
Cc08_g12360	GSCOC_T00030494001	Auxin-induced 5NG4	-2.37813
Cc04_g04880	GSCOC_T00022227001	Ethylene-responsive transcription factor ERF003	-2.37646
Cc00_g26270	GSCOC_T00007715001	Uncharacterized protein	-2.37592
Cc10_g06960	GSCOC_T00034591001	UDP-glycosyltransferase 85A2	-2.37458
Cc05_g06820	GSCOC_T00042197001	Uncharacterized protein At4g04980	-2.37056
Cc01_g09200	GSCOC_T00023967001	Serine carboxypeptidase-like 2	-2.36928
Cc09_g06440	GSCOC_T00005091001	MADS-box SOC1	-2.36623
Cc01_g07260	GSCOC_T00030158001	2 -deoxymugineic-acid 2 -dioxygenase	-2.36399
Cc11_g06920	GSCOC_T00020727001	late blight resistance homolog R1B-17	-2.36247
Cc03_g00610	GSCOC_T00025646001	Uncharacterized protein	-2.36065
Cc09_g02660	GSCOC_T00017646001	G-type lectin S-receptor-like serine threonine- kinase At1g11303	-2.35938
Cc04_g07330	GSCOC_T00022544001	ASPARTIC PROTEASE IN GUARD CELL 1	-2.35563
Cc02_g08260	GSCOC_T00029824001	Uncharacterized protein	-2.35474
Cc09_g01950	GSCOC_T00017742001	Cytochrome P450 77A3	-2.35093
Cc06_g09880	GSCOC_T00041856001	Probable ABIL5	-2.3481
Cc02_g01900	GSCOC_T00020027001	Uncharacterized protein	-2.34629
Cc00_g32800	GSCOC_T00001453001	Uncharacterized protein	-2.346
Cc00_g03680	GSCOC_T00001299001	Leucine-rich repeat receptor-like tyrosine- kinase PXC3	-2.34575
Cc05_g16500	GSCOC_T00038551001	Metal tolerance 10	-2.34415
Cc11_g13100	GSCOC_T00032224001	Origin recognition complex subunit 6	-2.34356
Cc09_g06430	GSCOC_T00005089001	MADS-box SOC1	-2.34298
Cc08_g04100	GSCOC_T00034216001	Topless-related 2	-2.34241
Cc07_g05730	GSCOC_T00039853001	Two-component response regulator ARR1	-2.3409
Cc09_g04950	GSCOC_T00007065001	DNA topoisomerase 1	-2.33811
Cc06_g03960	GSCOC_T00023697001	Cytokinin riboside 5 -monophosphate phosphoribohydrolase LOG1	-2.33751
Cc00_g26170	GSCOC_T00006050001	Glutathione S-transferase F12	-2.33234
Cc00_g14600	GSCOC_T00012538001	Outer envelope pore 16- chloroplastic mitochondrial	-2.3319
Cc07_g15540	GSCOC_T00036462001	Low affinity sulfate transporter 3	-2.33187
Cc00_g18160	GSCOC_T00004638001	Sodium hydrogen exchanger 3	-2.33086
Cc01_g12220	GSCOC_T00028150001	Glutelin type-A 1	-2.33018
Cc04_g02020	GSCOC_T00021867001	3-epi-6-deoxocathasterone 23-monooxygenase CYP90D1	-2.3247
Cc06_g22070	GSCOC_T00017141001	Cytochrome P450 83B1	-2.32362
Cc10_g12880	GSCOC_T00035372001	Uncharacterized protein	-2.3231
Cc01_g13570	GSCOC_T00028327001	UDP-glycosyltransferase 76C4	-2.32285
Cc04_g00420	GSCOC_T00021651001	Glutamate receptor	-2.32158
Cc05_g15530	GSCOC_T00038681001	Probable galactinol--sucrose galactosyltransferase 1	-2.32152
Cc01_g09230	GSCOC_T00023970001	Serine carboxypeptidase-like 18	-2.32069
Cc10_g13010	GSCOC_T00035355001	Uncharacterized protein	-2.31685
Cc03_g04100	GSCOC_T00026117001	Homocysteine S-methyltransferase 2	-2.31648
Cc01_g01330	GSCOC_T00037926001	F-box FBD LRR-repeat At1g16930	-2.31639
Cc05_g06200	GSCOC_T00042101001	Uncharacterized protein	-2.31507
Cc10_g01490	GSCOC_T00024620001	Kinesin 6	-2.31436
Cc08_g10220	GSCOC_T00026985001	Probable LRR receptor-like serine threonine- kinase At3g47570	-2.3126
Cc04_g02330	GSCOC_T00021903001	Uncharacterized protein	-2.31237
Cc01_g07250	GSCOC_T00030157001	1-aminocyclopropane-1-carboxylate oxidase homolog	-2.3029
Cc00_g00500	GSCOC_T00036137001	Probable receptor kinase At5g39020	-2.30047
Cc07_g18090	GSCOC_T00018803001	Probable pectinesterase pectinesterase inhibitor 51	-2.29946
Cc00_g04270	GSCOC_T00010977001	Uncharacterized protein	-2.29885
Cc03_g09520	GSCOC_T00030933001	Short-chain dehydrogenase TIC chloroplastic	-2.29715
Cc01_g01210	GSCOC_T00037967001	Disease resistance response 206	-2.29631
Cc08_g02690	GSCOC_T00037751001	Carboxylesterase 1	-2.29568
Cc02_g00720	GSCOC_T00019862001	Heavy metal-associated isoprenylated plant 26	-2.29339
Cc06_g04280	GSCOC_T00023742001	4-coumarate-- ligase-like 7	-2.29113
Cc11_g09250	GSCOC_T00032761001	DETOXIFICATION 2	-2.29022
Cc07_g20150	GSCOC_T00033940001	Lysine-specific demethylase 3B	-2.28827
Cc02_g17440	GSCOC_T00014259001	Transcription factor bHLH63	-2.28714
Cc02_g31960	GSCOC_T00027465001	LRR receptor-like serine threonine- kinase FLS2	-2.28228
Cc03_g08900	GSCOC_T00004204001	Uncharacterized protein	-2.28111
Cc05_g10180	GSCOC_T00021492001	Chitobiosyldiphosphodolichol beta-mannosyltransferase	-2.27941
Cc00_g18740	GSCOC_T00008461001	G-type lectin S-receptor-like serine threonine- kinase RKS1	-2.27919
Cc05_g13070	GSCOC_T00021108001	(-)-germacrene D synthase	-2.27917
Cc03_g14630	GSCOC_T00026688001	late blight resistance homolog R1A-6	-2.27823
Cc03_g04520	GSCOC_T00026174001	Probable disease resistance At1g58390	-2.27814
Cc06_g07090	GSCOC_T00031305001	Universal stress A	-2.27305
Cc06_g12630	GSCOC_T00041513001	Respiratory burst oxidase homolog E	-2.2694
Cc11_g11700	GSCOC_T00032411001	E3 ubiquitin- ligase At3g02290	-2.26916
Cc03_g15310	GSCOC_T00026809001	Acetolactate synthase small subunit	-2.26473
Cc02_g32690	GSCOC_T00001207001	Kinesin KIN-1	-2.26202
Cc04_g12520	GSCOC_T00005315001	Uncharacterized protein	-2.25894
Cc00_g16870	GSCOC_T00013631001	disease resistance RGA3	-2.25669
Cc04_g12070	GSCOC_T00005249001	Uncharacterized protein	-2.25608
Cc02_g04480	GSCOC_T00020364001	8-amino-7-oxononanoate synthase	-2.25292
Cc02_g29780	GSCOC_T00038881001	Uncharacterized protein	-2.24637
Cc07_g07310	GSCOC_T00040074001	Uncharacterized protein	-2.24371
Cc01_g16260	GSCOC_T00016463001	Uncharacterized protein	-2.24255
Cc01_g19070	GSCOC_T00016106001	Ankyrin repeat-containing ITN1	-2.24234
Cc01_g14830	GSCOC_T00028499001	Cation H(+) antiporter 24	-2.24143
Cc03_g14560	GSCOC_T00026674001	disease resistance RGA4	-2.24121
Cc01_g13990	GSCOC_T00028384001	Uncharacterized protein	-2.24052
Cc11_g03860	GSCOC_T00033995001	late blight resistance homolog R1B-14	-2.23838
Cc06_g12840	GSCOC_T00041485001	Uncharacterized protein	-2.2383
Cc05_g05210	GSCOC_T00035079001	late blight resistance homolog R1B-14	-2.23627
Cc02_g03700	GSCOC_T00020263001	Subtilisin-like protease	-2.2332
Cc08_g10270	GSCOC_T00026990001	Probable leucine-rich repeat receptor kinase At1g35710	-2.23211
Cc00_g31630	GSCOC_T00005665001	Uncharacterized protein	-2.22861
Cc03_g08070	GSCOC_T00033196001	Gibberellin 20 oxidase 1	-2.22809
Cc02_g19980	GSCOC_T00014578001	U-box domain-containing 19	-2.22804
Cc02_g36410	GSCOC_T00003927001	Cytochrome P450 76C2	-2.22694
Cc06_g14330	GSCOC_T00041270001	clathrin assembly At5g35200	-2.22006
Cc05_g01100	GSCOC_T00000912001	Uncharacterized protein	-2.21902
Cc01_g05210	GSCOC_T00011463001	Uncharacterized protein	-2.21286
Cc11_g04330	GSCOC_T00001353001	Uncharacterized protein	-2.21223
Cc11_g05430	GSCOC_T00020499001	Receptor 12	-2.21007
Cc07_g01180	GSCOC_T00019207001	Uncharacterized protein	-2.2031
Cc02_g13340	GSCOC_T00029170001	Phosphoserine phosphatase 1	-2.20167
Cc05_g09960	GSCOC_T00021519001	CASP 2A1	-2.1991
Cc02_g17140	GSCOC_T00014220001	Purple acid phosphatase 2	-2.19737
Cc00_g28190	GSCOC_T00010938001	Nucleolar complex 2 homolog	-2.18885
Cc07_g21110	GSCOC_T00027218001	Small nuclear ribonucleo Sm D3	-2.18395
Cc07_g17500	GSCOC_T00037422001	G-type lectin S-receptor-like serine threonine- kinase RLK1	-2.18375
Cc03_g00350	GSCOC_T00025614001	Inositol transporter 4	-2.18325
Cc08_g11210	GSCOC_T00027117001	Uncharacterized protein	-2.18265
Cc10_g06110	GSCOC_T00034703001	Uncharacterized protein	-2.17872
Cc08_g04180	GSCOC_T00034230001	TOPLESS	-2.17308
Cc10_g15980	GSCOC_T00033803001	Endoglucanase 9	-2.17252
Cc06_g02570	GSCOC_T00023514001	Expansin-A6	-2.16689
Cc10_g03870	GSCOC_T00024928001	Transcription factor MYB44	-2.16672
Cc07_g04970	GSCOC_T00039758001	Dihydroflavonol 4-reductase	-2.1666
Cc02_g15280	GSCOC_T00013969001	Probable LRR receptor-like serine threonine- kinase At3g47570	-2.16616
Cc05_g06730	GSCOC_T00042182001	Uncharacterized protein	-2.16514
Cc04_g04290	GSCOC_T00022152001	Uncharacterized protein	-2.16017
Cc02_g18130	GSCOC_T00014349001	Allene oxide synthase	-2.15923
Cc06_g12590	GSCOC_T00041519001	21 kDa	-2.15689
Cc11_g15460	GSCOC_T00038057001	Cysteine-rich receptor kinase 3	-2.15569
Cc02_g29590	GSCOC_T00018398001	Vetispiradiene synthase 1	-2.15381
Cc09_g04630	GSCOC_T00017402001	Uncharacterized protein	-2.14924
Cc00_g06550	GSCOC_T00005831001	Gibberellin 20 oxidase 1	-2.14806
Cc02_g36840	GSCOC_T00003868001	MLO 13	-2.146
Cc04_g11270	GSCOC_T00037297001	Cytochrome P450 71A8	-2.14409
Cc06_g19570	GSCOC_T00029024001	UDP-glucose flavonoid 3-O-glucosyltransferase 3	-2.14393
Cc08_g05690	GSCOC_T00024356001	Polyubiquitin	-2.1417
Cc00_g34280	GSCOC_T00013330001	Disease resistance RPM1	-2.14063
Cc11_g08060	GSCOC_T00032926001	F-box SKIP28	-2.14031
Cc02_g06360	GSCOC_T00039164001	Gibberellin 2-beta-dioxygenase 3	-2.13803
Cc06_g00580	GSCOC_T00023241001	Transcription factor SCREAM2	-2.1378
Cc02_g04660	GSCOC_T00020384001	F-box At5g07610	-2.13733
Cc01_g13200	GSCOC_T00028283001	Zinc transporter 1	-2.13653
Cc00_g29390	GSCOC_T00008189001	Glycinin G3	-2.13561
Cc05_g08960	GSCOC_T00016937001	G-type lectin S-receptor-like serine threonine- kinase SD2-5	-2.12888
Cc06_g08990	GSCOC_T00041977001	nuclease HARBI1	-2.12797
Cc00_g17320	GSCOC_T00001369001	UDP-3-O-acylglucosamine N-acyltransferase	-2.12666
Cc01_g14480	GSCOC_T00028447001	Potassium transporter 1	-2.11701
Cc10_g07180	GSCOC_T00034556001	Uncharacterized protein	-2.1155
Cc02_g26510	GSCOC_T00024948001	disease resistance RGA3	-2.11377
Cc06_g08550	GSCOC_T00031117001	Pentatricopeptide repeat-containing At5g48910	-2.11372
Cc08_g12770	GSCOC_T00030433001	14 kDa proline-rich	-2.11244
Cc10_g00150	GSCOC_T00024453001	Calvin cycle CP12- chloroplastic	-2.10929
Cc02_g11430	GSCOC_T00029412001	Transcription initiation factor IIF subunit beta	-2.10868
Cc00_g31070	GSCOC_T00006035001	Uncharacterized protein	-2.10745
Cc00_g10230	GSCOC_T00006743001	Gibberellin 3-beta-dioxygenase 4	-2.10592
Cc03_g15880	GSCOC_T00001648001	BTB POZ domain-containing At5g03250	-2.10421
Cc05_g01720	GSCOC_T00015748001	Uncharacterized protein	-2.09466
Cc02_g16160	GSCOC_T00014093001	GDSL esterase lipase At1g29670	-2.09456
Cc06_g07520	GSCOC_T00031251001	Uncharacterized protein	-2.09444
Cc02_g12000	GSCOC_T00029344001	G-type lectin S-receptor-like serine threonine- kinase RKS1	-2.09422
Cc05_g04670	GSCOC_T00007008001	Probable esterase PIR7A	-2.09331
Cc06_g13880	GSCOC_T00041335001	RING-H2 finger ATL70	-2.09232
Cc07_g13870	GSCOC_T00036685001	Methylmalonate-semialdehyde dehydrogenas	-2.09109
Cc00_g29920	GSCOC_T00012873001	Vacuolar sorting-associated 55 homolog	-2.08646
Cc00_g23320	GSCOC_T00002281001	Disease resistance RPM1	-2.08571
Cc03_g12370	GSCOC_T00015228001	Uncharacterized protein	-2.08332
Cc00_g27060	GSCOC_T00012723001	Uncharacterized protein	-2.08264
Cc11_g08570	GSCOC_T00032854001	Uncharacterized protein	-2.0826
Cc06_g18150	GSCOC_T00040419001	Bifunctional monodehydroascorbate reductase and carbonic anhydrase nectarin-3	-2.0812
Cc00_g24260	GSCOC_T00004189001	Cytochrome P450 716B1	-2.08012
Cc11_g13060	GSCOC_T00032229001	AC transposase	-2.07914
Cc00_g06340	GSCOC_T00004107001	Serine carboxypeptidase-like 2	-2.07542
Cc04_g12570	GSCOC_T00005322001	Short-chain dehydrogenase TIC chloroplastic	-2.07214
Cc00_g35230	GSCOC_T00004678001	Gamma-tubulin complex component 5	-2.07181
Cc04_g17210	GSCOC_T00035859001	ABC transporter A family member 2	-2.06985
Cc00_g29690	GSCOC_T00010530001	NRT1 PTR FAMILY	-2.06674
Cc10_g11650	GSCOC_T00001439001	late blight resistance homolog R1B-14	-2.06335
Cc08_g00790	GSCOC_T00038464001	Uncharacterized protein	-2.06198
Cc00_g09260	GSCOC_T00012312001	Disease resistance RPM1	-2.06122
Cc02_g04520	GSCOC_T00020369001	leucine-rich repeat receptor kinase At2g19210	-2.06114
Cc02_g25740	GSCOC_T00028706001	Phosphoglycolate phosphatase	-2.06053
Cc00_g30680	GSCOC_T00008178001	UDP-glycosyltransferase 85A3	-2.05747
Cc09_g06410	GSCOC_T00011304001	Cytochrome P450 71A1	-2.05528
Cc00_g09280	GSCOC_T00012314001	Disease resistance RPM1	-2.0549
Cc05_g10860	GSCOC_T00021388001	Probable leucine-rich repeat receptor-like serine threonine- kinase At3g14840	-2.04963
Cc02_g02820	GSCOC_T00020150001	Palmitoleoyl- carboxylesterase NOTUM	-2.04801
Cc03_g05310	GSCOC_T00026280001	Deacetoxyvindoline 4-hydroxylase	-2.0454
Cc04_g10090	GSCOC_T00042546001	Uncharacterized protein	-2.04244
Cc05_g13920	GSCOC_T00020999001	Transcription factor GAMYB	-2.04069
Cc07_g14960	GSCOC_T00036548001	UDP-glycosyltransferase 85A3	-2.03967
Cc07_g18170	GSCOC_T00018787001	Uncharacterized protein	-2.03913
Cc07_g08300	GSCOC_T00040200001	Uncharacterized transporter	-2.03843
Cc10_g07000	GSCOC_T00034585001	UDP-glycosyltransferase 85A2	-2.03647
Cc08_g02650	GSCOC_T00037746001	Probable carboxylesterase 120	-2.03594
Cc06_g11520	GSCOC_T00041648001	transcription factor bHLH041	-2.03431
Cc07_g00110	GSCOC_T00019073001	Methyltransferase 7B	-2.03402
Cc07_g00780	GSCOC_T00019157001	Fidgetin 1	-2.03361
Cc06_g15060	GSCOC_T00030885001	Probable LRR receptor-like serine threonine- kinase At2g24230	-2.03354
Cc10_g05260	GSCOC_T00034833001	Cytochrome P450 81F1	-2.03306
Cc02_g19960	GSCOC_T00014576001	Cyclin-D4-1	-2.03233
Cc00_g19010	GSCOC_T00001295001	Chalcone synthase E	-2.03188
Cc05_g06910	GSCOC_T00042207001	Bifunctional epoxide hydrolase 2	-2.03057
Cc00_g26730	GSCOC_T00003169001	Anthocyanidin	-2.02867
Cc02_g16370	GSCOC_T00014121001	Thaumatin	-2.02723
Cc11_g00810	GSCOC_T00019747001	Cysteine-rich receptor kinase 10	-2.02486
Cc04_g02480	GSCOC_T00021920001	Uncharacterized protein	-2.02436
Cc01_g09650	GSCOC_T00024028001	Flavanone 7-O-glucoside 2 -O-beta-L-rhamnosyltransferase	-2.02338
Cc10_g03140	GSCOC_T00024835001	Cytochrome P450 734A1	-2.02333
Cc02_g11920	GSCOC_T00029356001	Uncharacterized protein	-2.02251
Cc08_g02290	GSCOC_T00037694001	Leucine-rich repeat receptor kinase PEPR2	-2.01615
Cc01_g00640	GSCOC_T00011050001	Uncharacterized protein	-2.01524
Cc00_g30870	GSCOC_T00005393001	Apyrase	-2.01298
Cc06_g00080	GSCOC_T00023174001	Uncharacterized protein	-2.01273
Cc08_g01190	GSCOC_T00038420001	Glyoxylate reductase	-2.01258
Cc00_g21260	GSCOC_T00006902001	TPR and ankyrin repeat-containing 1	-2.01222
Cc00_g02120	GSCOC_T00001851001	Probable disease resistance At4g27220	-2.01085
Cc07_g08790	GSCOC_T00040268001	Bifunctional epoxide hydrolase 2	-2.01076
Cc04_g11300	GSCOC_T00037301001	Cytochrome P450 71A26	-2.00765
Cc08_g15060	GSCOC_T00035430001	Broad-range acid phosphatase DET1	-2.0069
Cc00_g12470	GSCOC_T00005354001	Probable flavonol synthase 5	-2.00535
Cc00_g15610	GSCOC_T00013445001	NADPH-dependent aldehyde reductase chloroplastic	-2.00169
Cc03_g04550	GSCOC_T00026178001	3-ketoacyl- synthase 2	-2.00167
Cc02_g13580	GSCOC_T00029130001	Uncharacterized protein	-1.99978
Cc07_g08690	GSCOC_T00040256001	Uncharacterized protein	-1.99924
Cc00_g20820	GSCOC_T00008930001	Uncharacterized protein	-1.99506
Cc02_g30330	GSCOC_T00018330001	Probable plastid-lipid-associated chloroplastic	-1.99311
Cc08_g08030	GSCOC_T00013078001	ABC transporter G family member 32	-1.99052
Cc07_g12510	GSCOC_T00036863001	ATP-dependent zinc metalloprotease FTSH chloroplastic	-1.99032
Cc10_g00420	GSCOC_T00024492001	Serine threonine- kinase endoribonuclease ire-1	-1.9887
Cc00_g12670	GSCOC_T00005847001	Pentatricopeptide repeat-containing At3g03580	-1.98692
Cc03_g11710	GSCOC_T00043190001	Uncharacterized protein	-1.98666
Cc00_g08290	GSCOC_T00004569001	Disease resistance response 206	-1.98644
Cc00_g31660	GSCOC_T00008829001	Uncharacterized protein	-1.98347
Cc10_g02160	GSCOC_T00024714001	Floral homeotic DEFICIENS	-1.98333
Cc02_g14630	GSCOC_T00013881001	chloroplastic	-1.98201
Cc08_g07410	GSCOC_T00025369001	Premnaspirodiene oxygenase	-1.98081
Cc05_g06240	GSCOC_T00042106001	Uncharacterized protein	-1.97923
Cc02_g12700	GSCOC_T00029249001	Uncharacterized protein	-1.97428
Cc03_g01280	GSCOC_T00025734001	Major allergen Pru ar 1	-1.9716
Cc02_g30790	GSCOC_T00023825001	Probable LRR receptor-like serine threonine- kinase At3g47570	-1.97029
Cc00_g03120	GSCOC_T00003068001	Annexin RJ4	-1.96934
Cc07_g06730	GSCOC_T00039994001	Probable phosphatase 2C 63	-1.96906
Cc02_g13990	GSCOC_T00029072001	Glutaredoxin-C9	-1.96875
Cc08_g01090	GSCOC_T00038431001	LRR receptor-like serine threonine- kinase ERECTA	-1.96789
Cc01_g11720	GSCOC_T00028082001	Uncharacterized protein	-1.96731
Cc05_g13310	GSCOC_T00021078001	Thiamine thiazole synthase chloroplastic	-1.96422
Cc07_g05330	GSCOC_T00039803001	Uncharacterized protein	-1.96398
Cc05_g02480	GSCOC_T00020948001	GDSL esterase lipase At2g42990	-1.96307
Cc06_g05110	GSCOC_T00043044001	Uncharacterized protein	-1.96264
Cc03_g07660	GSCOC_T00026625001	Chalcone--flavonone isomerase	-1.96255
Cc07_g16350	GSCOC_T00037571001	Cytochrome P450 86B1	-1.96113
Cc01_g21670	GSCOC_T00004952001	Uncharacterized protein	-1.96062
Cc02_g19370	GSCOC_T00014503001	Uncharacterized protein	-1.95909
Cc08_g16920	GSCOC_T00035669001	Alcohol dehydrogenase-like 3	-1.95906
Cc06_g00670	GSCOC_T00023255001	Sex determination tasselseed-2	-1.95731
Cc02_g19510	GSCOC_T00014519001	Snakin-1	-1.95567
Cc11_g08890	GSCOC_T00032814001	Isoeugenol synthase 1	-1.95458
Cc10_g07310	GSCOC_T00034539001	pumilio homolog chloroplastic	-1.95407
Cc03_g14190	GSCOC_T00031813001	Basic endochitinase	-1.9536
Cc01_g04580	GSCOC_T00041188001	Uncharacterized protein	-1.95136
Cc07_g02670	GSCOC_T00039469001	Uncharacterized protein	-1.95069
Cc10_g00850	GSCOC_T00024545001	Lysine histidine transporter-like 7	-1.94729
Cc02_g36230	GSCOC_T00006332001	disease resistance At3g14460	-1.94713
Cc03_g03940	GSCOC_T00026095001	Uncharacterized protein	-1.94698
Cc11_g04020	GSCOC_T00034025001	late blight resistance homolog R1A-6	-1.94619
Cc02_g23830	GSCOC_T00015087001	Bifunctional dihydroflavonol 4-reductase flavanone 4-reductase	-1.944
Cc01_g13520	GSCOC_T00028320001	Uncharacterized protein	-1.94364
Cc10_g04190	GSCOC_T00034966001	Chlorophyll a-b binding chloroplastic	-1.94108
Cc00_g01200	GSCOC_T00019021001	Uncharacterized protein	-1.93935
Cc02_g28450	GSCOC_T00009425001	Bifunctional dihydroflavonol 4-reductase flavanone 4-reductase	-1.93844
Cc02_g36340	GSCOC_T00003937001	Probable carboxylesterase 8	-1.93705
Cc03_g06700	GSCOC_T00026484001	UPF0481 At3g47200	-1.932
Cc09_g06090	GSCOC_T00033364001	LRR receptor-like serine threonine- kinase EFR	-1.93163
Cc11_g08050	GSCOC_T00032927001	Glucan endo-	-1.93035
Cc00_g15320	GSCOC_T00009839001	disease resistance RGA4	-1.93019
Cc06_g15850	GSCOC_T00030767001	MDIS1-interacting receptor like kinase 2	-1.93008
Cc06_g18090	GSCOC_T00040413001	Glycerol-3-phosphate dehydrogenas	-1.92884
Cc00_g20410	GSCOC_T00006771001	disease resistance RGA1	-1.92817
Cc00_g00720	GSCOC_T00036177001	F-box At5g07610	-1.92726
Cc10_g08280	GSCOC_T00034411001	Uncharacterized protein	-1.92312
Cc00_g19970	GSCOC_T00001484001	Wall-associated receptor kinase-like 2	-1.92257
Cc02_g34740	GSCOC_T00011780001	Uncharacterized protein	-1.92247
Cc02_g36730	GSCOC_T00003886001	Dihydroflavonol 4-reductase	-1.91832
Cc02_g14270	GSCOC_T00013834001	GDSL esterase lipase At5g45960	-1.91469
Cc10_g00750	GSCOC_T00024533001	Alcohol dehydrogenase-like 7	-1.91459
Cc00_g11010	GSCOC_T00000139001	Uncharacterized protein	-1.9143
Cc00_g34700	GSCOC_T00012667001	Glycine-rich RNA-binding GRP1A	-1.91277
Cc00_g19220	GSCOC_T00011836001	Uncharacterized protein	-1.91012
Cc10_g15170	GSCOC_T00033685001	Probable serine threonine- kinase At1g54610	-1.90612
Cc02_g37110	GSCOC_T00028036001	SPX domain-containing membrane At4g22990	-1.90577
Cc03_g10940	GSCOC_T00042039001	Cytochrome P450 71A2	-1.90548
Cc02_g09880	GSCOC_T00029597001	Heavy metal-associated isoprenylated plant 26	-1.90259
Cc03_g07320	GSCOC_T00026577001	Chalcone synthase	-1.89951
Cc06_g00940	GSCOC_T00023299001	Nodulation-signaling pathway 2	-1.89847
Cc02_g14500	GSCOC_T00013861001	Hexose carrier HEX6	-1.89818
Cc02_g19300	GSCOC_T00014495001	Triacylglycerol lipase 1	-1.89644
Cc01_g21750	GSCOC_T00004943001	Uncharacterized protein	-1.8934
Cc02_g18270	GSCOC_T00014366001	B3 domain-containing At5g18090	-1.89322
Cc03_g07810	GSCOC_T00026645001	Uncharacterized protein	-1.89278
Cc05_g01880	GSCOC_T00015778001	GEM 5	-1.89236
Cc06_g09980	GSCOC_T00041845001	Rac-like GTP-binding ARAC7	-1.89202
Cc05_g03980	GSCOC_T00031571001	Bifunctional epoxide hydrolase 2	-1.89169
Cc06_g01980	GSCOC_T00023438001	Copper transporter 6	-1.88926
Cc00_g00850	GSCOC_T00041131001	TMV resistance N	-1.88755
Cc02_g10090	GSCOC_T00029567001	receptor kinase At5g39000	-1.88636
Cc03_g09580	GSCOC_T00030941001	Probably inactive leucine-rich repeat receptor kinase At5g48380	-1.88542
Cc06_g17030	GSCOC_T00012645001	disease resistance RGA1	-1.88535
Cc03_g02130	GSCOC_T00025849001	Proline-rich receptor kinase PERK15	-1.88409
Cc02_g16350	GSCOC_T00014119001	Endo-	-1.88316
Cc11_g10630	GSCOC_T00032552001	Leucoanthocyanidin reductase	-1.8818
Cc00_g14320	GSCOC_T00011142001	NADP-dependent D-sorbitol-6-phosphate dehydrogenase	-1.87706
Cc01_g02640	GSCOC_T00009669001	Villin-3	-1.877
Cc04_g02970	GSCOC_T00021981001	PLANT CADMIUM RESISTANCE 8	-1.87679
Cc06_g17840	GSCOC_T00040375001	Zeatin O-glucosyltransferase	-1.87521
Cc01_g19510	GSCOC_T00016049001	FANTASTIC FOUR 3	-1.87468
Cc08_g07850	GSCOC_T00011880001	WRKY transcription factor 18	-1.8735
Cc00_g30720	GSCOC_T00002466001	Uncharacterized protein	-1.86952
Cc01_g11380	GSCOC_T00024267001	MLO 6	-1.8684
Cc05_g14940	GSCOC_T00038756001	Fasciclin-like arabinogalactan 1	-1.86681
Cc01_g20580	GSCOC_T00015916001	Glutathione S-transferase	-1.86605
Cc05_g02500	GSCOC_T00020945001	GDSL esterase lipase At2g04570	-1.86402
Cc01_g21240	GSCOC_T00005004001	Uncharacterized protein	-1.8637
Cc03_g06720	GSCOC_T00026489001	Uncharacterized protein	-1.8633
Cc06_g04800	GSCOC_T00043003001	Pistil-specific extensin	-1.86251
Cc00_g19230	GSCOC_T00011837001	Blue copper	-1.8625
Cc08_g10700	GSCOC_T00027044001	UDP-sulfoquinovose chloroplastic	-1.86139
Cc02_g02470	GSCOC_T00020102001	Uncharacterized membrane	-1.85927
Cc02_g03790	GSCOC_T00020275001	LRR receptor-like serine threonine- kinase ERL2	-1.85876
Cc10_g11920	GSCOC_T00031871001	NADPH-dependent alkenal one chloroplastic	-1.85544
Cc10_g10570	GSCOC_T00036008001	Uncharacterized protein	-1.85392
Cc05_g06340	GSCOC_T00042120001	Uncharacterized protein	-1.8532
Cc10_g15470	GSCOC_T00033728001	Phosphoribosylaminoimidazole-succinocarboxamide chloroplastic	-1.85188
Cc00_g17020	GSCOC_T00005618001	Uncharacterized protein	-1.8507
Cc08_g08240	GSCOC_T00007244001	Uncharacterized protein	-1.85043
Cc10_g05160	GSCOC_T00034847001	receptor kinase 1	-1.84935
Cc06_g00980	GSCOC_T00023304001	Ethylene-overproduction 1	-1.84683
Cc10_g08640	GSCOC_T00034363001	Uncharacterized protein	-1.84642
Cc02_g20730	GSCOC_T00014692001	Uncharacterized protein	-1.84493
Cc00_g31820	GSCOC_T00004172001	STRICTOSIDINE SYNTHASE-LIKE 12	-1.84142
Cc04_g01570	GSCOC_T00021813001	NADH dehydrogenas	-1.84021
Cc02_g30400	GSCOC_T00023753001	Uncharacterized protein	-1.83638
Cc07_g10280	GSCOC_T00037137001	Uncharacterized protein	-1.83362
Cc07_g18080	GSCOC_T00018805001	Probable pectinesterase pectinesterase inhibitor 51	-1.82955
Cc06_g18860	GSCOC_T00028924001	pentatricopeptide repeat-containing mitochondrial	-1.82924
Cc04_g11500	GSCOC_T00037341001	Tropinone reductase homolog At1g07440	-1.82803
Cc00_g00060	GSCOC_T00036077001	Cycloartenol synthase 2	-1.82581
Cc03_g06620	GSCOC_T00026473001	26S proteasome non-ATPase regulatory subunit 1	-1.82164
Cc06_g08040	GSCOC_T00031181001	Uncharacterized protein	-1.82107
Cc05_g13170	GSCOC_T00021098001	Oxygen-evolving enhancer 3- chloroplastic	-1.82094
Cc06_g16460	GSCOC_T00030690001	F-box kelch-repeat At3g06240	-1.81747
Cc05_g08190	GSCOC_T00016833001	Demethylrebeccamycin-D-glucose O-methyltransferase	-1.81738
Cc10_g11730	GSCOC_T00031844001	Sister chromatid cohesion PDS5 homolog A	-1.81708
Cc11_g07320	GSCOC_T00018067001	Pentatricopeptide repeat-containing At2g01740	-1.81282
Cc06_g08810	GSCOC_T00031084001	2-type zinc finger At1g67325	-1.81231
Cc02_g39370	GSCOC_T00027725001	O-acyltransferase WSD1	-1.81112
Cc11_g01560	GSCOC_T00019550001	Uncharacterized protein	-1.81104
Cc11_g01520	GSCOC_T00019557001	Uncharacterized protein	-1.80953
Cc03_g15640	GSCOC_T00026856001	NADPH-dependent oxidoreductase 2-alkenal reductase	-1.80943
Cc06_g19410	GSCOC_T00029002001	Uncharacterized protein	-1.80852
Cc00_g29400	GSCOC_T00008190001	Uncharacterized protein	-1.80849
Cc08_g16210	GSCOC_T00035575001	Calcineurin B 7	-1.807
Cc02_g26410	GSCOC_T00028611001	Glutathione transferase GST 23	-1.80697
Cc06_g04950	GSCOC_T00043022001	Probable glycosyltransferase At5g03795	-1.80693
Cc03_g13480	GSCOC_T00018977001	30S ribosomal chloroplastic	-1.80611
Cc00_g20600	GSCOC_T00013339001	Receptor 12	-1.80568
Cc00_g10990	GSCOC_T00000137001	Secologanin synthase	-1.80357
Cc11_g02050	GSCOC_T00033035001	Probable disease resistance At1g58390	-1.80245
Cc04_g12000	GSCOC_T00037417001	Uncharacterized protein	-1.8018
Cc00_g27500	GSCOC_T00007279001	Uncharacterized protein	-1.79935
Cc11_g08440	GSCOC_T00032875001	Uncharacterized protein	-1.79797
Cc02_g05550	GSCOC_T00039067001	Adenine guanine permease AZG1	-1.79698
Cc00_g35490	GSCOC_T00007713001	disease resistance RGA4	-1.79691
Cc02_g36100	GSCOC_T00042749001	membrane-bound O-acyltransferase	-1.79655
Cc05_g10110	GSCOC_T00021499001	Probable glutathione S-transferase	-1.79639
Cc01_g19400	GSCOC_T00016062001	Ent-copalyl diphosphate chloroplastic	-1.79442
Cc00_g16400	GSCOC_T00011388001	(+)-neomenthol dehydrogenase	-1.79393
Cc09_g10340	GSCOC_T00041057001	Serine threonine phosphatase 2A 59 kDa regulatory subunit B eta isoform	-1.7927
Cc02_g10100	GSCOC_T00029566001	Receptor kinase FERONIA	-1.79261
Cc04_g00110	GSCOC_T00021610001	STRUBBELIG-RECEPTOR FAMILY 5	-1.79205
Cc11_g12120	GSCOC_T00032358001	14-3-3 GF14 iota	-1.79145
Cc02_g38960	GSCOC_T00027784001	Arabinogalactan 20	-1.78953
Cc11_g10740	GSCOC_T00032539001	Clavaminate synthase At3g21360	-1.78772
Cc06_g03580	GSCOC_T00023643001	Uncharacterized protein	-1.78666
Cc02_g29720	GSCOC_T00010177001	p21-activated kinase-interacting 1-like	-1.78666
Cc07_g09780	GSCOC_T00037198001	Soluble inorganic pyrophosphatase	-1.78665
Cc02_g09170	GSCOC_T00029692001	Very-long-chain enoyl- reductase	-1.78484
Cc02_g20210	GSCOC_T00014627001	Aspartate--tRNA(Asp Asn) ligase	-1.78472
Cc09_g10820	GSCOC_T00040998001	Bifunctional dihydroflavonol 4-reductase flavanone 4-reductase	-1.78186
Cc03_g06680	GSCOC_T00026482001	UPF0481 At3g47200	-1.77831
Cc00_g08060	GSCOC_T00006937001	Uncharacterized protein	-1.77729
Cc00_g04190	GSCOC_T00006614001	60S ribosomal L10-2	-1.77728
Cc06_g06330	GSCOC_T00031396001	Uncharacterized protein	-1.77617
Cc05_g04460	GSCOC_T00031672001	late blight resistance homolog R1B-14	-1.77598
Cc01_g19710	GSCOC_T00016024001	Uncharacterized protein	-1.77541
Cc08_g00600	GSCOC_T00038492001	Uncharacterized protein	-1.77454
Cc01_g18390	GSCOC_T00016211001	Ethylene-responsive transcription factor 1B	-1.77266
Cc05_g04790	GSCOC_T00035015001	DETOXIFICATION 41	-1.77051
Cc00_g18540	GSCOC_T00008824001	Cytochrome P450 71A4	-1.76938
Cc05_g01710	GSCOC_T00015747001	Linoleate 13S-lipoxygenase 3- chloroplastic	-1.76769
Cc01_g13160	GSCOC_T00028278001	Abscisic acid 8 -hydroxylase 2	-1.76393
Cc06_g15650	GSCOC_T00030792001	Probable kinase At2g41970	-1.76169
Cc11_g07380	GSCOC_T00018059001	Pentatricopeptide repeat-containing At2g01740	-1.76119
Cc07_g00040	GSCOC_T00019066001	Uncharacterized protein L728	-1.76033
Cc11_g13170	GSCOC_T00032216001	Probable E3 ubiquitin- ligase HERC1	-1.75938
Cc06_g13580	GSCOC_T00041376001	UDP-glycosyltransferase 78D2	-1.75819
Cc08_g04480	GSCOC_T00015634001	Anthocyanin regulatory C1	-1.75517
Cc02_g11380	GSCOC_T00029418001	Uncharacterized protein	-1.75494
Cc05_g11630	GSCOC_T00021289001	UDP-glycosyltransferase 79B3	-1.75451
Cc10_g07600	GSCOC_T00034501001	Uncharacterized protein	-1.75424
Cc00_g13800	GSCOC_T00013305001	Glucan endo-	-1.75394
Cc00_g00520	GSCOC_T00036140001	Cell number regulator 3	-1.75374
Cc04_g06970	GSCOC_T00022498001	Uncharacterized protein	-1.75306
Cc04_g14270	GSCOC_T00035968001	Disease resistance RPP13	-1.75285
Cc02_g04640	GSCOC_T00020381001	Acid phosphatase 1	-1.75257
Cc06_g17140	GSCOC_T00012661001	MDIS1-interacting receptor like kinase 2	-1.75199
Cc11_g16740	GSCOC_T00038220001	Probable mitochondrial chaperone bcs1	-1.75051
Cc07_g06910	GSCOC_T00040021001	Formamidase	-1.7505
Cc00_g07820	GSCOC_T00007023001	Uncharacterized protein	-1.74944
Cc00_g18000	GSCOC_T00010354001	Thymocyte nuclear 1	-1.74891
Cc00_g30490	GSCOC_T00007453001	UDP-rhamnose:rhamnosyltransferase 1	-1.74733
Cc10_g11660	GSCOC_T00001441001	E3 ubiquitin ligase Rnf157	-1.7467
Cc11_g11960	GSCOC_T00032377001	Probable inactive purple acid phosphatase 1	-1.74331
Cc05_g09090	GSCOC_T00002673001	late blight resistance homolog R1B-8	-1.74309
Cc00_g20260	GSCOC_T00010403001	Bifunctional uridylyltransferase uridylyl-removing enzyme	-1.74283
Cc00_g02310	GSCOC_T00007937001	Probable receptor kinase At5g39030	-1.7396
Cc02_g15850	GSCOC_T00014049001	Long chain acyl- synthetase 1	-1.73952
Cc02_g36660	GSCOC_T00003895001	Uncharacterized protein	-1.73934
Cc10_g13400	GSCOC_T00035298001	Serine threonine- kinase rio1	-1.73779
Cc08_g10230	GSCOC_T00026986001	Probable leucine-rich repeat receptor kinase At1g35710	-1.73722
Cc00_g25640	GSCOC_T00006098001	Uncharacterized protein	-1.73663
Cc04_g05340	GSCOC_T00022284001	AP2-like ethylene-responsive transcription factor At1g16060	-1.73576
Cc03_g00840	GSCOC_T00025681001	Receptor kinase ANXUR2	-1.73571
Cc04_g11250	GSCOC_T00037294001	Cytochrome P450 71A2	-1.73544
Cc01_g06650	GSCOC_T00030062001	Scarecrow 30	-1.73526
Cc02_g35180	GSCOC_T00042890001	high mobility group B 11	-1.73464
Cc02_g22640	GSCOC_T00014941001	homolog subfamily B member 4	-1.73367
Cc11_g06780	GSCOC_T00020704001	Receptor 12	-1.73188
Cc01_g08300	GSCOC_T00015533001	Alcohol dehydrogenase-like 7	-1.72961
Cc01_g21610	GSCOC_T00004959001	Flowering time control FCA	-1.72677
Cc09_g01800	GSCOC_T00017763001	Uncharacterized protein	-1.72484
Cc08_g12570	GSCOC_T00030464001	Uncharacterized protein	-1.71887
Cc10_g05770	GSCOC_T00034768001	F-box kelch-repeat At5g43190	-1.71795
Cc05_g12940	GSCOC_T00021123001	Indole-3-acetic acid-amido synthetase	-1.71781
Cc07_g02550	GSCOC_T00039453001	Uncharacterized protein	-1.71775
Cc03_g07510	GSCOC_T00026604001	Naringeni	-1.71734
Cc00_g26280	GSCOC_T00007717001	Disease resistance RGA2	-1.71635
Cc04_g04040	GSCOC_T00022121001	Late embryogenesis abundant Dc3	-1.71611
Cc01_g09210	GSCOC_T00023968001	serine carboxypeptidase-like 52	-1.71535
Cc02_g29370	GSCOC_T00018357001	disease resistance RPP13 1	-1.71383
Cc00_g07320	GSCOC_T00000206001	Somatic embryogenesis receptor kinase 1	-1.71358
Cc00_g31530	GSCOC_T00007984001	UDP-glycosyltransferase 85A2	-1.70892
Cc00_g11820	GSCOC_T00007746001	Cyclin-D2-1	-1.70735
Cc02_g06970	GSCOC_T00039253001	Uncharacterized protein At2g39920	-1.70647
Cc02_g29030	GSCOC_T00011530001	Bifunctional dihydroflavonol 4-reductase flavanone 4-reductase	-1.7053
Cc04_g17150	GSCOC_T00035849001	Tubulin alpha chain	-1.70288
Cc11_g08450	GSCOC_T00032873001	Uncharacterized protein	-1.70189
Cc05_g12450	GSCOC_T00021190001	Beta-glucosidase 18	-1.70189
Cc09_g04870	GSCOC_T00007055001	Probable splicing factor 3A subunit 1	-1.70131
Cc01_g16150	GSCOC_T00016475001	lipid-transfer DIR1	-1.70005
Cc09_g07270	GSCOC_T00036287001	Alpha-glucosidase	-1.69996
Cc04_g13450	GSCOC_T00018286001	Uncharacterized protein	-1.6996
Cc01_g10010	GSCOC_T00024080001	Uncharacterized protein	-1.69907
Cc11_g13930	GSCOC_T00032123001	Uncharacterized protein	-1.69728
Cc07_g14470	GSCOC_T00036611001	Magnesium-transporting P-type 1	-1.6933
Cc01_g03930	GSCOC_T00040889001	G-type lectin S-receptor-like serine threonine- kinase RLK1	-1.69262
Cc03_g07110	GSCOC_T00026548001	Serine threonine- kinase CTR1	-1.69261
Cc05_g09570	GSCOC_T00021566001	Two pore potassium channel c	-1.69224
Cc00_g02150	GSCOC_T00001857001	Probable disease resistance At4g27220	-1.69213
Cc06_g13410	GSCOC_T00041401001	Xyloglucan endotransglucosylase hydrolase 22	-1.69049
Cc08_g14240	GSCOC_T00030249001	Thaumatin	-1.68835
Cc07_g15490	GSCOC_T00036469001	G-type lectin S-receptor-like serine threonine- kinase RLK1	-1.68695
Cc08_g02700	GSCOC_T00037754001	Carboxylesterase 1	-1.68448
Cc00_g18080	GSCOC_T00007955001	Germin subfamily T member 2	-1.68402
Cc00_g29320	GSCOC_T00001281001	Probable membrane-associated kinase regulator 5	-1.68357
Cc02_g15820	GSCOC_T00014046001	Aquaporin NIP1-1	-1.68034
Cc10_g11870	GSCOC_T00031865001	F-box kelch-repeat At3g06240	-1.67704
Cc04_g11460	GSCOC_T00037334001	Pentatricopeptide repeat-containing mitochondrial	-1.67646
Cc02_g11510	GSCOC_T00029403001	MLO 6	-1.6748
Cc09_g06460	GSCOC_T00005094001	MADS-box SOC1	-1.67462
Cc07_g01770	GSCOC_T00039353001	LATERAL ORGAN BOUNDARIES	-1.67341
Cc00_g16340	GSCOC_T00012371001	Uncharacterized protein	-1.67278
Cc03_g11700	GSCOC_T00043189001	Uncharacterized protein	-1.67128
Cc05_g02150	GSCOC_T00018412001	Disease resistance At4g27190	-1.66805
Cc02_g12560	GSCOC_T00029268001	ADP-ribosylation factor GTPase-activating AGD5	-1.66733
Cc00_g17910	GSCOC_T00008097001	Gibberellin 2-beta-dioxygenase 8	-1.66602
Cc02_g18470	GSCOC_T00014391001	La-related 7	-1.66528
Cc11_g02370	GSCOC_T00032980001	Uncharacterized protein	-1.66471
Cc04_g03940	GSCOC_T00022110001	(6-4)DNA photolyase	-1.66462
Cc07_g19240	GSCOC_T00018617001	DNA topoisomerase 3-alpha	-1.66418
Cc03_g14170	GSCOC_T00031810001	Uncharacterized protein	-1.66362
Cc07_g12360	GSCOC_T00036884001	Probable L-type lectin-domain containing receptor kinase	-1.66353
Cc01_g00770	GSCOC_T00011072001	Uncharacterized protein	-1.66276
Cc11_g04990	GSCOC_T00020432001	Receptor kinase FERONIA	-1.66191
Cc09_g07670	GSCOC_T00036221001	Wall-associated receptor kinase 5	-1.65728
Cc04_g17200	GSCOC_T00035857001	ABC transporter A family member 7	-1.65676
Cc08_g02380	GSCOC_T00037709001	Ent-kaurenoic acid oxidase 2	-1.65469
Cc10_g13630	GSCOC_T00035258001	Probable calcium-binding CML44	-1.65199
Cc01_g08080	GSCOC_T00015497001	Uncharacterized protein	-1.64958
Cc06_g09010	GSCOC_T00041975001	Potassium channel AKT1	-1.64941
Cc01_g14600	GSCOC_T00028466001	Pentatricopeptide repeat-containing chloroplastic	-1.64902
Cc04_g02740	GSCOC_T00021952001	Uncharacterized isomerase BH0283	-1.64635
Cc11_g07970	GSCOC_T00032940001	Ankyrin repeat-containing At5g02620	-1.64558
Cc10_g05100	GSCOC_T00034854001	Serine carboxypeptidase-like 9	-1.64437
Cc07_g09850	GSCOC_T00037190001	Mannan endo-	-1.64271
Cc00_g20200	GSCOC_T00006541001	Methyl- -binding domain-containing 4	-1.6411
Cc00_g10000	GSCOC_T00005176001	Probable LRR receptor-like serine threonine- kinase At3g47570	-1.63894
Cc11_g10300	GSCOC_T00032595001	Heavy metal-associated isoprenylated plant 26	-1.63886
Cc00_g05650	GSCOC_T00011949001	disease resistance RPP13 1	-1.63858
Cc07_g17610	GSCOC_T00018874001	Cycloeucalenol cycloisomerase	-1.63855
Cc11_g15290	GSCOC_T00038039001	Polygalacturonase At1g48100	-1.63812
Cc04_g13400	GSCOC_T00018293001	Uncharacterized protein	-1.63706
Cc06_g09420	GSCOC_T00041916001	Uncharacterized protein	-1.6367
Cc03_g12350	GSCOC_T00015230001	Uncharacterized CRM domain-containing chloroplastic	-1.63455
Cc11_g16280	GSCOC_T00038164001	Uncharacterized protein	-1.63358
Cc02_g10280	GSCOC_T00029545001	Lysine histidine transporter 1	-1.63308
Cc07_g09930	GSCOC_T00037181001	Probable mitochondrial chaperone bcs1	-1.63068
Cc05_g08230	GSCOC_T00016841001	Heparanase 3	-1.62846
Cc07_g04390	GSCOC_T00039695001	Receptor kinase FERONIA	-1.6269
Cc04_g05440	GSCOC_T00022295001	Very-long-chain aldehyde decarbonylase CER3	-1.62674
Cc02_g27030	GSCOC_T00025019001	Probable nucleoredoxin 1	-1.6261
Cc06_g12260	GSCOC_T00041559001	Uncharacterized protein	-1.62595
Cc02_g25730	GSCOC_T00028707001		-1.62275
Cc03_g14710	GSCOC_T00026703001	Probable disease resistance At4g19060	-1.62205
Cc07_g08470	GSCOC_T00040221001	DETOXIFICATION 4	-1.62155
Cc11_g09190	GSCOC_T00032772001	Histone chaperone ASF1B	-1.62125
Cc02_g33780	GSCOC_T00013091001	Probable linoleate 9S-lipoxygenase 5	-1.62022
Cc01_g15920	GSCOC_T00016503001	pentatricopeptide repeat-containing chloroplastic	-1.61811
Cc04_g08580	GSCOC_T00022722001	Uncharacterized protein	-1.61794
Cc05_g06660	GSCOC_T00042169001	Uncharacterized protein	-1.61575
Cc00_g28150	GSCOC_T00004070001	Uncharacterized protein	-1.6152
Cc07_g11720	GSCOC_T00036968001	Catalase isozyme 1	-1.61476
Cc06_g06340	GSCOC_T00031395001	Uncharacterized protein	-1.61438
Cc05_g16530	GSCOC_T00038547001	PLASMODESMATA CALLOSE-BINDING PROTEIN 1	-1.61332
Cc07_g18930	GSCOC_T00018664001	pentatricopeptide repeat-containing mitochondrial	-1.61295
Cc05_g14190	GSCOC_T00038851001	Endoglucanase 11	-1.61251
Cc04_g16100	GSCOC_T00042401001	Uncharacterized protein	-1.61129
Cc00_g13910	GSCOC_T00006563001	Uncharacterized protein	-1.61055
Cc08_g15580	GSCOC_T00035495001	Uncharacterized protein	-1.6105
Cc03_g11910	GSCOC_T00043227001	ATP synthase subunit mitochondrial	-1.60936
Cc10_g00650	GSCOC_T00024522001	Uncharacterized protein	-1.60825
Cc04_g05620	GSCOC_T00022322001	Glutamyl-tRNA(Gln) amidotransferase subunit A	-1.60798
Cc02_g08580	GSCOC_T00029775001	Receptor kinase HERK 1	-1.60659
Cc02_g24280	GSCOC_T00002343001	Spindle and kinetochore-associated 1 homolog	-1.6063
Cc00_g10780	GSCOC_T00000618001	Disease resistance RPP8	-1.60607
Cc08_g04170	GSCOC_T00034229001	TOPLESS	-1.60497
Cc02_g24440	GSCOC_T00028885001	SPX domain-containing 3	-1.60418
Cc06_g01350	GSCOC_T00023351001	Uncharacterized protein	-1.60028
Cc11_g15390	GSCOC_T00038049001	F-box kelch-repeat At1g23390	-1.59655
Cc03_g14800	GSCOC_T00026722001	late blight resistance homolog R1B-17	-1.59422
Cc06_g03130	GSCOC_T00023585001	Uncharacterized protein	-1.59279
Cc02_g02640	GSCOC_T00020125001	Short-chain dehydrogenase TIC chloroplastic	-1.59227
Cc08_g07860	GSCOC_T00011881001	WRKY transcription factor 18	-1.59175
Cc01_g16180	GSCOC_T00016472001	Uncharacterized protein	-1.59037
Cc02_g04040	GSCOC_T00020307001	Uncharacterized protein	-1.59035
Cc02_g30570	GSCOC_T00023788001	calcium-transporting ATPase plasma membrane-type	-1.58916
Cc07_g07990	GSCOC_T00040161001	Uncharacterized protein	-1.58913
Cc02_g02580	GSCOC_T00020116001	BAHD acyltransferase DCR	-1.5888
Cc07_g06020	GSCOC_T00039894001	Uncharacterized protein At3g61260	-1.58871
Cc09_g00010	GSCOC_T00018001001	Uncharacterized protein	-1.5876
Cc09_g02920	GSCOC_T00017612001	Peroxisome biogenesis 16	-1.58719
Cc11_g15340	GSCOC_T00038044001	Uncharacterized protein	-1.57736
Cc03_g00890	GSCOC_T00025688001	Uncharacterized protein	-1.57674
Cc01_g08380	GSCOC_T00015544001	Lysosomal beta glucosidase	-1.57594
Cc09_g01120	GSCOC_T00017852001	DNA repair RAD5A	-1.57512
Cc08_g09930	GSCOC_T00026948001	Receptor kinase 5	-1.57321
Cc03_g07650	GSCOC_T00026622001	Uncharacterized protein	-1.57179
Cc08_g00360	GSCOC_T00038533001	F-box FBD LRR-repeat At5g22670	-1.57128
Cc07_g19660	GSCOC_T00018531001	Isoflavone 2 -hydroxylase	-1.5696
Cc02_g27420	GSCOC_T00025072001	Histone	-1.56901
Cc08_g13950	GSCOC_T00030283001	Uncharacterized protein	-1.56456
Cc08_g07130	GSCOC_T00025315001	UDP-glycosyltransferase 73C4	-1.56318
Cc02_g23310	GSCOC_T00015020001	Prolycopene chloroplastic	-1.56312
Cc09_g04440	GSCOC_T00017425001	Pentatricopeptide repeat-containing At1g06143	-1.56258
Cc06_g02670	GSCOC_T00023526001	Probable phosphatase 2C 4	-1.56176
Cc03_g14520	GSCOC_T00026669001	Probable glutathione S-transferase	-1.56038
Cc03_g08270	GSCOC_T00033228001	late blight resistance homolog R1B-17	-1.55916
Cc04_g08070	GSCOC_T00022655001	Tropinone reductase homolog At1g07440	-1.55881
Cc02_g06220	GSCOC_T00039148001	Omega-hydroxypalmitate O-feruloyl transferase	-1.55772
Cc11_g13880	GSCOC_T00032128001	TMV resistance N	-1.557
Cc06_g11830	GSCOC_T00041611001	Threonine chloroplastic	-1.55605
Cc10_g04890	GSCOC_T00034880001	Cyclin-D3-1	-1.55505
Cc11_g06770	GSCOC_T00020703001	Receptor 12	-1.55473
Cc07_g14200	GSCOC_T00036645001	Chaperone	-1.55468
Cc06_g17550	GSCOC_T00040335001	Probable leucine-rich repeat receptor kinase At1g35710	-1.55408
Cc11_g02000	GSCOC_T00033041001	Probable disease resistance RPP8 2	-1.55349
Cc04_g12790	GSCOC_T00008271001	Uncharacterized protein	-1.55306
Cc09_g07040	GSCOC_T00036325001	Uncharacterized protein	-1.55114
Cc05_g08860	GSCOC_T00016921001	Secologanin synthase	-1.55059
Cc10_g00360	GSCOC_T00024486001	Peptidyl-prolyl cis-trans isomerase chloroplastic	-1.54994
Cc06_g19450	GSCOC_T00029007001	3-hydroxypropionyl-coenzyme A dehydratase	-1.54937
Cc06_g23540	GSCOC_T00040555001	Organic cation carnitine transporter 7	-1.54819
Cc08_g14470	GSCOC_T00030219001	O-glucosyltransferase rumi homolog	-1.5456
Cc02_g27320	GSCOC_T00025059001	Siroheme synthase	-1.54529
Cc02_g35230	GSCOC_T00042879001	Probable glycerol-3-phosphate acyltransferase 2	-1.54518
Cc08_g11250	GSCOC_T00027123001	DNA repair endonuclease UVH1	-1.54361
Cc06_g16390	GSCOC_T00030699001	Transcription factor bHLH130	-1.54333
Cc10_g03990	GSCOC_T00034991001	Uroporphyrinogen-III chloroplastic	-1.54281
Cc04_g00360	GSCOC_T00021641001	Exocyst complex component 7	-1.54275
Cc09_g07320	GSCOC_T00036281001	Exopolyphosphatase PRUNE1	-1.54193
Cc00_g17780	GSCOC_T00013265001	Serine carboxypeptidase-like 18	-1.54172
Cc06_g11590	GSCOC_T00041639001	Uncharacterized protein	-1.5399
Cc11_g16560	GSCOC_T00038196001	DNA polymerase alpha subunit B	-1.53529
Cc06_g02210	GSCOC_T00023469001	Delta-1-pyrroline-5-carboxylate synthase	-1.53443
Cc10_g11360	GSCOC_T00013651001	Digestive organ expansion factor homolog	-1.53417
Cc09_g01010	GSCOC_T00017870001	Serine threonine tyrosine- kinase HT1	-1.53322
Cc02_g16930	GSCOC_T00014195001	Uncharacterized protein	-1.53048
Cc10_g01700	GSCOC_T00024656001	Uncharacterized protein	-1.52992
Cc09_g05650	GSCOC_T00033436001	Probable LRR receptor-like serine threonine- kinase At3g47570	-1.52962
Cc05_g14310	GSCOC_T00038833001	Phosphatidate cytidylyltransferase 1	-1.52892
Cc07_g03610	GSCOC_T00039604001	Phosphate transporter PHO1 homolog 9	-1.52885
Cc02_g01610	GSCOC_T00019988001	Phosphatidylinositol 4-kinase gamma 5	-1.52836
Cc06_g09020	GSCOC_T00041974001	Potassium channel AKT1	-1.52832
Cc05_g01840	GSCOC_T00015771001	GEM 5	-1.52825
Cc07_g12110	GSCOC_T00036919001	Phosphate carrier mitochondrial	-1.52738
Cc04_g03030	GSCOC_T00021990001	Homeobox-leucine zipper GLABRA 2	-1.52686
Cc11_g06730	GSCOC_T00020698001	Probable LRR receptor-like serine threonine- kinase At4g36180	-1.52684
Cc00_g14230	GSCOC_T00005205001	argonaute 4	-1.52523
Cc00_g13620	GSCOC_T00011115001	Uncharacterized protein	-1.52493
Cc11_g03810	GSCOC_T00033983001	Uncharacterized protein	-1.52331
Cc06_g13600	GSCOC_T00041373001	Pathogenesis-related PR-1	-1.52258
Cc06_g19440	GSCOC_T00029006001	UPF0481 At3g02645	-1.51986
Cc03_g03580	GSCOC_T00026050001	Linoleate 9S-lipoxygenase 5	-1.51952
Cc00_g14000	GSCOC_T00010021001	Probable pectate lyase 4	-1.517
Cc09_g01080	GSCOC_T00017860001	E3 ubiquitin- ligase COP1	-1.51642
Cc11_g15510	GSCOC_T00038065001	Uncharacterized protein	-1.51581
Cc00_g27390	GSCOC_T00006767001	disease resistance RGA4	-1.51557
Cc07_g00290	GSCOC_T00019095001	Uncharacterized protein	-1.51512
Cc00_g05690	GSCOC_T00011954001	amidase	-1.51486
Cc05_g15080	GSCOC_T00038736001	Cellulose synthase E6	-1.51382
Cc02_g36270	GSCOC_T00006336001	disease resistance RGA3	-1.51132
Cc08_g13940	GSCOC_T00030284001	UDP-galactose UDP-glucose transporter 4	-1.51125
Cc01_g19310	GSCOC_T00016076001	Uncharacterized isomerase BH0283	-1.51041
Cc07_g17870	GSCOC_T00018834001	Histone-lysine N-methyltransferase 2C	-1.50946
Cc11_g10010	GSCOC_T00032640001	Uncharacterized protein	-1.50901
Cc07_g14350	GSCOC_T00036625001	Zinc-finger homeodomain 2	-1.50747
Cc01_g09140	GSCOC_T00023958001	Serine carboxypeptidase-like 2	-1.50611
Cc11_g09560	GSCOC_T00032702001	Uncharacterized amino-acid permease	-1.50558
Cc02_g17540	GSCOC_T00014273001	Probable LRR receptor-like serine threonine- kinase At2g16250	-1.50351
Cc07_g02390	GSCOC_T00039427001	Uncharacterized protein	-1.50329
Cc06_g03950	GSCOC_T00023696001	Auxin response factor 18	-1.50306
Cc09_g10560	GSCOC_T00041031001	NAC domain-containing 94	-1.50273
Cc08_g00100	GSCOC_T00005565001	Uncharacterized protein	-1.5013
Cc07_g19990	GSCOC_T00033911001	Auxin-induced 5NG4	-1.49948
Cc07_g02850	GSCOC_T00039494001	rRNA methyltransferase	-1.4994
Cc11_g09170	GSCOC_T00032774001	Fruit pKIWI502	-1.49704
Cc05_g10820	GSCOC_T00021394001	Probable leucine-rich repeat receptor-like serine threonine- kinase At3g14840	-1.49517
Cc04_g08640	GSCOC_T00022734001	Receptor-like serine threonine- kinase SD1-8	-1.49371
Cc07_g00600	GSCOC_T00019138001	Ribosome-recycling factor	-1.49363
Cc05_g10640	GSCOC_T00021414001	Uncharacterized protein	-1.49322
Cc06_g04120	GSCOC_T00023719001	RNA polymerase sigma factor	-1.49282
Cc08_g03140	GSCOC_T00037825001	Receptor 12	-1.49263
Cc00_g09320	GSCOC_T00008203001	disease resistance RPP13 1	-1.48958
Cc09_g06500	GSCOC_T00005101001	Uncharacterized protein	-1.48924
Cc09_g05930	GSCOC_T00033387001	Wall-associated receptor kinase-like 9	-1.48811
Cc10_g12380	GSCOC_T00031944001	ABC transporter C family member 9	-1.48688
Cc02_g10110	GSCOC_T00029565001	Uncharacterized protein	-1.48645
Cc03_g13960	GSCOC_T00031767001	Mediator of RNA polymerase II transcription subunit 21	-1.48599
Cc00_g17680	GSCOC_T00007031001	Probable aldo-keto reductase 2	-1.48539
Cc05_g05010	GSCOC_T00035049001	Uncharacterized protein	-1.4851
Cc02_g23630	GSCOC_T00015065001	2-C-methyl-D-erythritol 4-phosphate chloroplastic	-1.48004
Cc08_g01980	GSCOC_T00037655001	Disease resistance RPM1	-1.47987
Cc06_g05990	GSCOC_T00043169001	4 -phosphopantetheinyl transferase	-1.47892
Cc02_g01090	GSCOC_T00019917001	Metal-nicotianamine transporter YSL3	-1.47824
Cc06_g05630	GSCOC_T00043122001	Uncharacterized protein	-1.47777
Cc02_g02480	GSCOC_T00020103001	Uncharacterized membrane	-1.47697
Cc07_g09060	GSCOC_T00040300001	Geranylgeranyl pyrophosphate chloroplastic	-1.47694
Cc05_g07080	GSCOC_T00042230001	Pentatricopeptide repeat-containing At1g02150	-1.47679
Cc02_g00920	GSCOC_T00019893001	Uncharacterized protein	-1.47494
Cc00_g18190	GSCOC_T00011623001	Uncharacterized protein	-1.4748
Cc07_g20410	GSCOC_T00015692001	Receptor 12	-1.47365
Cc11_g04170	GSCOC_T00034053001	Protease 2	-1.47302
Cc02_g12940	GSCOC_T00029218001	Bifunctional epoxide hydrolase 2	-1.47086
Cc00_g10440	GSCOC_T00005156001	ATP-dependent DNA helicase Q-like SIM	-1.46966
Cc06_g18000	GSCOC_T00040398001	MDIS1-interacting receptor like kinase 2	-1.46935
Cc04_g13100	GSCOC_T00011379001	Uncharacterized protein At5g5010	-1.46829
Cc02_g34510	GSCOC_T00000700001	Phospholipase D zeta 1	-1.46742
Cc02_g13230	GSCOC_T00029184001	Endonuclease 2	-1.46679
Cc04_g15630	GSCOC_T00042339001	Xanthoxin dehydrogenase	-1.46619
Cc04_g03320	GSCOC_T00022025001	IST1	-1.4644
Cc11_g08980	GSCOC_T00032803001	late blight resistance homolog R1A-6	-1.4631
Cc00_g22800	GSCOC_T00009270001	Ferrochelatase- chloroplastic	-1.46296
Cc11_g10200	GSCOC_T00032609001	Bifunctional dihydroflavonol 4-reductase flavanone 4-reductase	-1.46237
Cc02_g03750	GSCOC_T00020268001	Xyloglucan galactosyltransferase KATAMARI1 homolog	-1.46235
Cc02_g10370	GSCOC_T00029536001	Bark storage A	-1.46122
Cc01_g13950	GSCOC_T00028379001	Phosphomethylpyrimidine chloroplastic	-1.46005
Cc01_g09150	GSCOC_T00023960001	Serine carboxypeptidase-like 19	-1.45986
Cc02_g26470	GSCOC_T00024943001	Uncharacterized protein	-1.45942
Cc09_g07590	GSCOC_T00036235001	Cytochrome P450 734A1	-1.45895
Cc09_g07190	GSCOC_T00036302001	Reticuline oxidase	-1.45888
Cc01_g19470	GSCOC_T00016053001	Chloroplast stem-loop binding of 41 kDa chloroplastic	-1.45708
Cc01_g21590	GSCOC_T00004963001	Pentatricopeptide repeat-containing chloroplastic	-1.45611
Cc11_g08830	GSCOC_T00032821001	Transcription repressor MYB6	-1.45557
Cc05_g09450	GSCOC_T00021584001	Uncharacterized protein	-1.45436
Cc01_g11710	GSCOC_T00028081001	DDB1- and CUL4-associated factor 8	-1.45424
Cc00_g24460	GSCOC_T00004470001	Disease resistance At4g27190	-1.45413
Cc09_g06450	GSCOC_T00005093001	MADS-box SOC1	-1.45373
Cc04_g00830	GSCOC_T00021708001	Subtilisin-like protease	-1.45353
Cc11_g07040	GSCOC_T00018115001	Nudix hydrolase mitochondrial	-1.45243
Cc10_g04990	GSCOC_T00034865001	Uncharacterized protein	-1.45227
Cc02_g10080	GSCOC_T00029568001	Cytochrome P450 77A2	-1.44846
Cc03_g12150	GSCOC_T00015279001	Pentatricopeptide repeat-containing At1g62350	-1.44825
Cc08_g01020	GSCOC_T00038438001	2-hydroxymuconate semialdehyde hydrolase	-1.44795
Cc02_g09500	GSCOC_T00029648001	Uncharacterized protein	-1.44672
Cc02_g34470	GSCOC_T00000696001	F-box VBF	-1.44603
Cc02_g37200	GSCOC_T00028026001	Uncharacterized protein	-1.44583
Cc00_g12370	GSCOC_T00013520001	Uncharacterized protein	-1.44572
Cc02_g14060	GSCOC_T00029062001	MLO 6	-1.44539
Cc07_g14850	GSCOC_T00036561001	F-box FBW2	-1.44444
Cc02_g28500	GSCOC_T00009434001	Bifunctional dihydroflavonol 4-reductase flavanone 4-reductase	-1.44362
Cc04_g02380	GSCOC_T00021909001	GDSL esterase lipase APG	-1.44344
Cc03_g01410	GSCOC_T00025753001	Probable phosphatase 2C 34	-1.44286
Cc08_g10800	GSCOC_T00027059001	Glutaredoxin-C6	-1.44282
Cc02_g01480	GSCOC_T00019971001	Soluble starch synthase chloroplastic amyloplastic	-1.44241
Cc01_g20260	GSCOC_T00015954001	Uncharacterized protein	-1.44205
Cc07_g03420	GSCOC_T00039571001	Vacuolar amino acid transporter 1	-1.43982
Cc10_g02530	GSCOC_T00024757001	Bifunctional dihydrofolate reductase-thymidylate synthase	-1.43818
Cc06_g18490	GSCOC_T00040465001	GAST1	-1.43769
Cc10_g02480	GSCOC_T00024752001	Omega-hydroxypalmitate O-feruloyl transferase	-1.43743
Cc02_g34040	GSCOC_T00000635001	Transcription factor bHLH18	-1.43698
Cc08_g16800	GSCOC_T00035654001	2-hydroxymuconate semialdehyde hydrolase	-1.43665
Cc02_g13890	GSCOC_T00029082001	Receptor kinase 5	-1.43644
Cc10_g10630	GSCOC_T00036015001	Pathogenesis-related 5	-1.4311
Cc00_g24750	GSCOC_T00010167001	Glycosyltransferase family 92 Os08g0121900	-1.43077
Cc06_g22000	GSCOC_T00015615001	NLP7	-1.43033
Cc06_g15080	GSCOC_T00030883001	Pentatricopeptide repeat-containing chloroplastic	-1.43
Cc06_g12010	GSCOC_T00041586001	DNA-directed RNA polymerase III subunit RPC4	-1.42808
Cc05_g09310	GSCOC_T00002647001	Uncharacterized protein	-1.42651
Cc01_g03070	GSCOC_T00019040001	Serine threonine- kinase PBS1	-1.42542
Cc08_g01860	GSCOC_T00037639001	Expansin-like B1	-1.42392
Cc07_g14480	GSCOC_T00036610001	Magnesium-transporting P-type 1	-1.41979
Cc08_g16380	GSCOC_T00035596001	ABIL3	-1.41957
Cc06_g15980	GSCOC_T00030750001	18 kDa seed maturation	-1.41943
Cc05_g05250	GSCOC_T00035087001	Disease resistance RFL1	-1.4194
Cc10_g16040	GSCOC_T00033814001	Reticuline oxidase	-1.41813
Cc09_g00150	GSCOC_T00017985001	Uncharacterized protein	-1.41781
Cc07_g05320	GSCOC_T00039802001	Uncharacterized protein	-1.41732
Cc00_g12240	GSCOC_T00008602001	ADP-ribosylation factor GTPase-activating AGD3	-1.41645
Cc00_g14780	GSCOC_T00001121001	Uncharacterized protein	-1.41615
Cc02_g10190	GSCOC_T00029555001	receptor kinase At5g39000	-1.41593
Cc00_g14140	GSCOC_T00004713001	Interferon-induced GTP-binding Mx1	-1.41547
Cc01_g07520	GSCOC_T00009387001	Probable inactive receptor kinase At5g10020	-1.41359
Cc07_g16440	GSCOC_T00037562001	LRR receptor-like serine threonine- kinase GSO1	-1.41202
Cc01_g15850	GSCOC_T00016510001	Uncharacterized protein	-1.41189
Cc01_g16750	GSCOC_T00016404001	Uncharacterized protein	-1.41072
Cc06_g09180	GSCOC_T00041948001	Uncharacterized sodium-dependent transporter	-1.41033
Cc00_g22790	GSCOC_T00009269001	Ferrochelatase- chloroplastic	-1.4093
Cc02_g06180	GSCOC_T00039143001	UDP-sugar pyrophosphorylase	-1.40874
Cc07_g05610	GSCOC_T00039839001	Probable esterase PIR7A	-1.40653
Cc02_g27850	GSCOC_T00025137001	Uncharacterized protein	-1.40524
Cc08_g16270	GSCOC_T00035582001	Uncharacterized protein	-1.40434
Cc00_g32030	GSCOC_T00008801001	Chalcone synthase E	-1.40042
Cc01_g21210	GSCOC_T00005007001	Uncharacterized protein	-1.40003
Cc02_g19860	GSCOC_T00014562001	Uncharacterized protein	-1.39948
Cc00_g01460	GSCOC_T00010650001	L-type lectin-domain containing receptor kinase	-1.39788
Cc10_g09700	GSCOC_T00031511001	NRT1 PTR FAMILY	-1.39725
Cc07_g07950	GSCOC_T00040157001	Serine mitochondrial	-1.39654
Cc07_g08450	GSCOC_T00040218001	DETOXIFICATION 6	-1.39574
Cc00_g21840	GSCOC_T00010999001	Uncharacterized protein	-1.39574
Cc06_g17730	GSCOC_T00040361001	Kinesin KIN-14G	-1.39473
Cc00_g04440	GSCOC_T00010857001	Adenylosuccinate lyase	-1.39436
Cc02_g20970	GSCOC_T00014722001	Carbonic chloroplastic	-1.39285
Cc06_g16700	GSCOC_T00030649001	Uncharacterized protein	-1.39281
Cc04_g04390	GSCOC_T00022163001	Uncharacterized protein	-1.39254
Cc06_g05510	GSCOC_T00043104001	Uncharacterized protein	-1.39191
Cc03_g05320	GSCOC_T00026281001	1-aminocyclopropane-1-carboxylate oxidase homolog 1	-1.39165
Cc03_g05190	GSCOC_T00026267001	1-aminocyclopropane-1-carboxylate oxidase homolog 3	-1.39115
Cc11_g16030	GSCOC_T00038132001	E3 ubiquitin- ligase RGLG2	-1.38899
Cc02_g34360	GSCOC_T00000676001	Bifunctional epoxide hydrolase 2	-1.38897
Cc01_g20880	GSCOC_T00005048001	Magnesium proton exchanger	-1.38888
Cc03_g03670	GSCOC_T00026062001	Primary amine oxidase	-1.38781
Cc00_g33800	GSCOC_T00007693001	Apyrase	-1.38781
Cc02_g36800	GSCOC_T00003874001	Uncharacterized protein	-1.38725
Cc03_g00580	GSCOC_T00025641001	Poly(A) polymerase	-1.3865
Cc07_g00630	GSCOC_T00019141001	Probable inactive leucine-rich repeat receptor kinase At3g03770	-1.38623
Cc02_g16660	GSCOC_T00014159001	Aquaporin TIP3-2	-1.38539
Cc03_g07820	GSCOC_T00026646001	Ankyrin repeat-containing At5g02620	-1.38494
Cc03_g03130	GSCOC_T00025991001	Uncharacterized protein	-1.3841
Cc00_g22270	GSCOC_T00007436001	Uncharacterized protein	-1.38297
Cc07_g00200	GSCOC_T00019084001	Zinc finger CONSTANS-LIKE 7	-1.38215
Cc03_g05390	GSCOC_T00026289001	RING-H2 finger ATL16	-1.38104
Cc02_g32740	GSCOC_T00016690001	Phosphatidylinositol N-acetylglucosaminyltransferase subunit A	-1.37939
Cc07_g18620	GSCOC_T00018725001	Auxin-induced 5NG4	-1.37937
Cc05_g16080	GSCOC_T00038607001	chloroplastic	-1.37913
Cc06_g14390	GSCOC_T00041262001	Bifunctional dihydroflavonol 4-reductase flavanone 4-reductase	-1.37876
Cc03_g04130	GSCOC_T00026122001	lin-54 homolog	-1.37752
Cc02_g34690	GSCOC_T00000730001	Uncharacterized protein	-1.3774
Cc07_g19150	GSCOC_T00018635001	Uncharacterized protein At1g10890	-1.37737
Cc00_g01150	GSCOC_T00019008001	Uncharacterized protein	-1.37728
Cc06_g10760	GSCOC_T00041736001	ATP-dependent 6-phosphofructokinase 3	-1.37603
Cc01_g20020	GSCOC_T00015983001	Histone H2AX	-1.37593
Cc00_g31780	GSCOC_T00003971001	NRT1 PTR FAMILY	-1.37467
Cc06_g11200	GSCOC_T00041687001	Transcription factor MYB1R1	-1.37461
Cc02_g14480	GSCOC_T00013859001	Uncharacterized protein	-1.37429
Cc09_g07030	GSCOC_T00036326001	Pentatricopeptide repeat-containing chloroplastic	-1.37255
Cc00_g04650	GSCOC_T00008395001	PHD finger-containing DDB_G0268158	-1.37227
Cc08_g09260	GSCOC_T00017272001	NRT1 PTR FAMILY	-1.37151
Cc05_g00320	GSCOC_T00017059001	Mannose-1-phosphate guanylyltransferase 1	-1.37071
Cc07_g15740	GSCOC_T00036435001	Uncharacterized protein	-1.3688
Cc01_g14410	GSCOC_T00028439001	Uncharacterized protein	-1.36853
Cc06_g00560	GSCOC_T00023237001	Uncharacterized protein	-1.36841
Cc08_g04270	GSCOC_T00034246001	Uncharacterized protein At1g51745	-1.36794
Cc08_g01880	GSCOC_T00037641001	UMP-CMP kinase 3	-1.36606
Cc02_g26530	GSCOC_T00024950001	50S ribosomal chloroplastic (Fragment)	-1.36599
Cc02_g06730	GSCOC_T00039216001	Anthranilate synthase alpha subunit chloroplastic	-1.36548
Cc11_g05120	GSCOC_T00020452001	G-type lectin S-receptor-like serine threonine- kinase At4g27290	-1.36423
Cc02_g36610	GSCOC_T00003901001	Uncharacterized protein	-1.36222
Cc05_g07040	GSCOC_T00042224001	Uncharacterized protein	-1.36007
Cc08_g11490	GSCOC_T00027151001	50S ribosomal L19- chloroplastic	-1.36002
Cc04_g16850	GSCOC_T00035799001	Uncharacterized protein	-1.35912
Cc02_g18670	GSCOC_T00014418001	B3 domain-containing Os01g0234100	-1.35719
Cc04_g03750	GSCOC_T00022079001	Molybdate transporter 2	-1.3571
Cc07_g05920	GSCOC_T00039880001	Uncharacterized membrane At3g27390	-1.35693
Cc01_g04320	GSCOC_T00004449001	Lysosomal Pro-X carboxypeptidase	-1.35675
Cc07_g09880	GSCOC_T00037187001	Oxygen-evolving enhancer 3- chloroplastic	-1.35661
Cc11_g10260	GSCOC_T00032600001	Pleckstrin homology domain-containing family A member 8	-1.35513
Cc11_g06050	GSCOC_T00020588001	Ankyrin repeat-containing ITN1	-1.35475
Cc03_g00120	GSCOC_T00025588001	CBL-interacting serine threonine- kinase 1	-1.35417
Cc06_g21640	GSCOC_T00001539001	Uncharacterized protein	-1.35415
Cc02_g04070	GSCOC_T00020310001	Probable serine threonine- kinase DDB_G0272282	-1.3538
Cc01_g00800	GSCOC_T00011075001	Peptidyl-tRNA mitochondrial	-1.35326
Cc05_g15690	GSCOC_T00038657001	Uncharacterized protein	-1.35263
Cc11_g16000	GSCOC_T00038129001	Uncharacterized protein	-1.35211
Cc01_g04940	GSCOC_T00028571001	ABC transporter G family member 15	-1.35017
Cc05_g01830	GSCOC_T00015769001	Uncharacterized protein	-1.34912
Cc06_g19980	GSCOC_T00022889001	Endoribonuclease Dicer homolog 2	-1.34908
Cc07_g19330	GSCOC_T00018601001	NAD-dependent deacylase SRT2	-1.34725
Cc04_g13790	GSCOC_T00035886001	Probable LRR receptor-like serine threonine- kinase At2g16250	-1.34651
Cc07_g10490	GSCOC_T00037109001	Kinesin-related 11	-1.34639
Cc11_g10150	GSCOC_T00032615001	Zinc finger CONSTANS-LIKE 16	-1.34606
Cc01_g00780	GSCOC_T00011073001	Transcription repressor MYB5	-1.34516
Cc08_g11710	GSCOC_T00027177001	Tripartite motif-containing 65	-1.34341
Cc10_g05400	GSCOC_T00034809001	Isoflavone 2 -hydroxylase	-1.34119
Cc01_g05230	GSCOC_T00011456001	disease resistance RGA3	-1.34057
Cc03_g09440	GSCOC_T00030921001	Glycine-rich	-1.33987
Cc01_g05740	GSCOC_T00027391001	F-box LRR-repeat At4g14096	-1.33871
Cc11_g03440	GSCOC_T00040783001	Chaperone	-1.3385
Cc00_g19910	GSCOC_T00007589001	Uncharacterized protein	-1.33833
Cc08_g11580	GSCOC_T00027162001	Zeaxanthin chloroplastic	-1.33722
Cc11_g09790	GSCOC_T00032670001	Probable receptor kinase At5g39030	-1.33697
Cc03_g06830	GSCOC_T00026503001	Carboxyl-terminal-processing protease	-1.33605
Cc05_g10060	GSCOC_T00021504001	Leucine-rich repeat receptor-like serine threonine- kinase At1g17230	-1.33521
Cc01_g14500	GSCOC_T00028449001	chloroplastic	-1.33067
Cc11_g15650	GSCOC_T00038083001	Uncharacterized protein	-1.32851
Cc04_g02320	GSCOC_T00021901001	EARLY FLOWERING 3	-1.32844
Cc03_g12130	GSCOC_T00015283001	Zinc transporter 5	-1.3281
Cc07_g00010	GSCOC_T00019063001	tRNA pseudouridine synthase B	-1.32714
Cc10_g07410	GSCOC_T00034525001	Probable trehalose-phosphate phosphatase E	-1.32677
Cc04_g10650	GSCOC_T00042628001		-1.32589
Cc01_g05190	GSCOC_T00011466001	Zinc finger CCCH domain-containing 52	-1.3255
Cc05_g03200	GSCOC_T00033515001	Serine threonine phosphatase 2A 59 kDa regulatory subunit B gamma isoform	-1.32479
Cc07_g19630	GSCOC_T00018537001	GTPase Der	-1.32327
Cc00_g26260	GSCOC_T00007872001	disease resistance RGA4	-1.32302
Cc00_g04360	GSCOC_T00005968001	Probable mitochondrial chaperone bcs1	-1.32146
Cc02_g17510	GSCOC_T00014269001	Uncharacterized protein	-1.32098
Cc03_g01690	GSCOC_T00025790001	Phylloplanin	-1.32082
Cc04_g02890	GSCOC_T00021972001	Auxin-responsive IAA8	-1.32028
Cc04_g07970	GSCOC_T00022638001	Protease 4	-1.31945
Cc02_g02110	GSCOC_T00020057001	Plastidial pyruvate kinase 2	-1.31892
Cc00_g15370	GSCOC_T00001282001	Uncharacterized protein	-1.31829
Cc03_g08560	GSCOC_T00033278001	disease resistance RGA1	-1.31522
Cc03_g06640	GSCOC_T00026476001	UPF0481 At3g47200	-1.31485
Cc06_g05080	GSCOC_T00043041001	Uncharacterized protein	-1.31477
Cc04_g16410	GSCOC_T00035736001	Chlorophyll a-b binding chloroplastic	-1.3134
Cc05_g08180	GSCOC_T00016832001	Uncharacterized protein	-1.3123
Cc10_g11760	GSCOC_T00031847001	Receptor 12	-1.3115
Cc07_g01010	GSCOC_T00019186001	SCARECROW	-1.31115
Cc08_g05890	GSCOC_T00024385001	Uncharacterized protein At1g28695	-1.31076
Cc06_g12330	GSCOC_T00041549001	ATP-dependent DNA helicase Q-like 3	-1.31033
Cc03_g06540	GSCOC_T00026450001	F-box CPR1	-1.30928
Cc00_g29410	GSCOC_T00005692001	BURP domain RD22	-1.30925
Cc01_g04400	GSCOC_T00004464001	Uncharacterized protein	-1.30728
Cc05_g11780	GSCOC_T00021271001	Ribosomal L11 methyltransferase	-1.30702
Cc06_g11770	GSCOC_T00041617001	Uncharacterized protein	-1.30634
Cc07_g01550	GSCOC_T00039327001	SUPPRESSOR OF GAMMA RESPONSE 1	-1.30545
Cc06_g02200	GSCOC_T00023468001	Uracil phosphoribosyltransferase	-1.30469
Cc04_g11100	GSCOC_T00037271001	Probable galactinol--sucrose galactosyltransferase 2	-1.30368
Cc07_g07240	GSCOC_T00040065001	glycosyltransferase 7	-1.30355
Cc05_g10140	GSCOC_T00021496001	Ubiquitin carboxyl-terminal hydrolase 25	-1.30335
Cc11_g14920	GSCOC_T00001042001	Uncharacterized protein At4g14100	-1.30207
Cc08_g09310	GSCOC_T00017279001	NRT1 PTR FAMILY	-1.29958
Cc05_g05860	GSCOC_T00035173001	UDP-glucose flavonoid 3-O-glucosyltransferase 6	-1.29957
Cc08_g15090	GSCOC_T00035433001	Uncharacterized protein	-1.29919
Cc05_g15430	GSCOC_T00038693001	Fructose-bisphosphate cytoplasmic isozyme 1	-1.29862
Cc07_g11030	GSCOC_T00037046001	Uncharacterized protein	-1.29854
Cc03_g15090	GSCOC_T00026766001	UDP-glycosyltransferase 74F2	-1.29752
Cc00_g08570	GSCOC_T00005643001	MDIS1-interacting receptor like kinase 2	-1.29708
Cc01_g02420	GSCOC_T00009711001	Non-specific lipid transfer GPI-anchored 1	-1.29607
[truncated: 4,657 more rows]
