# Supplementary material for: Transcriptomic Leaf Profiling Reveals Differential Responses of the Two Most Traded Coffee Species to Elevated [CO2]
Source: Int J Mol Sci. 2020 Dec 3;21(23):9211. doi: 10.3390/ijms21239211 (PMC7730880; doi:10.3390/ijms21239211)
Supplement: Supplementary file 1 [file ijms-21-09211-s001.zip › Table S7.xlsx]

## Sheet: down-regulation
Gene ID	ORF Name	Protein Name	Icatu-Fold Change	CL153-Fold Change
Cc00_g06550	GSCOC_T00005831001	Gibberellin 20 oxidase 1	2.04233	-2.51111
Cc00_g01650	GSCOC_T00002754001	Ribosomal mitochondrial	3.06669	-0.900255
Cc05_g10160	GSCOC_T00021494001	Probable glutathione S-transferase parC	1.52532	-2.4281
Cc00_g01730	GSCOC_T00002831001	Uncharacterized mitochondrial g00910	2.55356	-1.21437
Cc00_g01610	GSCOC_T00002721001	Succinate dehydrogenase cytochrome b560 subunit	2.31836	-1.44655
Cc02_g07150	GSCOC_T00009480001	17.6 kDa class I heat shock 3	2.24081	-0.675077
Cc08_g12550	GSCOC_T00030466001	Small heat shock chloroplastic	1.94334	-0.954412
Cc11_g07490	GSCOC_T00018048001	Leucine-rich repeat receptor kinase EMS1	2.35879	-0.489692
Cc05_g00760	GSCOC_T00013166001	Acidic endochitinase	1.40417	-1.4188
Cc01_g19020	GSCOC_T00016112001	Heat stress transcription factor A-6b	1.43283	-1.18794
Cc02_g10510	GSCOC_T00029522001	Non-symbiotic hemoglobin 2	0.828013	-1.74482
Cc01_g13580	GSCOC_T00028328001	17.5 kDa class I heat shock	0.597769	-1.65447
Cc00_g04190	GSCOC_T00006614001	60S ribosomal L10-2	1.11348	-1.12106
Cc01_g13160	GSCOC_T00028278001	Abscisic acid 8 -hydroxylase 2	1.92469	-0.250023
Cc06_g11570	GSCOC_T00041642001	Heat stress transcription factor A-2	0.866208	-1.15089
Cc07_g11710	GSCOC_T00036969001	Catalase isozyme 1	1.67234	-0.31303
Cc02_g01840	GSCOC_T00020020001	Bidirectional sugar transporter SWEET3	1.58965	-0.373356
Cc09_g02330	GSCOC_T00017690001	Two-component response regulator-like PRR37	0.331027	-1.58564
Cc10_g03120	GSCOC_T00024833001	Cytochrome P450 734A1	0.820972	-1.08384
Cc05_g12510	GSCOC_T00021183001	NAC domain-containing 18	0.81377	-1.08322
Cc08_g09890	GSCOC_T00026943001	Histidine-containing phosphotransfer 4	0.790967	-1.01558
Cc08_g09070	GSCOC_T00017247001	Alcohol dehydrogenase class-3	0.542101	-1.18734
Cc02_g18330	GSCOC_T00014373001	Naringeni	0.28906	-1.28899
Cc10_g09580	GSCOC_T00031525001	Cysteine ase inhibitor 5	0.577399	-0.984922
Cc03_g04100	GSCOC_T00026117001	Homocysteine S-methyltransferase 2	1.13611	-0.387773
Cc03_g05320	GSCOC_T00026281001	1-aminocyclopropane-1-carboxylate oxidase homolog 1	1.13065	-0.342674
Cc02_g05750	GSCOC_T00039091001	sodium-coupled neutral amino acid transporter 7	0.499668	-0.941544
Cc11_g14920	GSCOC_T00001042001	Uncharacterized protein At4g14100	0.860264	-0.580717
Cc09_g00190	GSCOC_T00017980001	BTB POZ domain-containing At5g47800	0.483045	-0.898021
Cc03_g09080	GSCOC_T00042716001	Peptidyl-prolyl cis-trans isomerase FKBP65	0.495537	-0.850348
Cc06_g15300	GSCOC_T00030848001	Outer membrane lipo Blc	1.17841	-0.154821
Cc03_g05980	GSCOC_T00026372001	Probable fatty acid methyltransferase	1.09477	-0.228465
Cc08_g10590	GSCOC_T00027030001	Glycine dehydrogenase (decarboxylating) mitochondrial	1.04563	-0.260881
Cc02_g06570	GSCOC_T00039198001	Cytochrome P450 89A2	1.10081	-0.186988
Cc10_g08720	GSCOC_T00034351001	Phospholipase DDHD1	0.57719	-0.706008
Cc05_g16500	GSCOC_T00038551001	Metal tolerance 10	0.355286	-0.924846
Cc08_g12090	GSCOC_T00030529001	UPF0676	0.658077	-0.611883
Cc02_g16950	GSCOC_T00014197001	Fructose-bisphosphate aldolase chloroplastic	0.341663	-0.927306
Cc05_g00200	GSCOC_T00017045001	B-box zinc finger 24	1.10316	-0.159781
Cc08_g13050	GSCOC_T00030389001	Elongation factor G- chloroplastic	0.919869	-0.321293
Cc05_g09570	GSCOC_T00021566001	Two pore potassium channel c	0.752943	-0.476569
Cc05_g10930	GSCOC_T00021380001	DNA polymerase delta subunit 3	0.57801	-0.640211
Cc04_g00550	GSCOC_T00021673001	ATPase plasma membrane-type	0.51444	-0.698846
Cc02_g20480	GSCOC_T00014661001	K(+) efflux antiporter chloroplastic	0.947684	-0.258959
Cc00_g27350	GSCOC_T00012547001	Elongation factor chloroplastic	0.568189	-0.637083
Cc10_g00640	GSCOC_T00024521001		0.889075	-0.311246
Cc11_g04700	GSCOC_T00042896001	Cleavage stimulation factor subunit 1	0.417473	-0.771551
Cc00_g18840	GSCOC_T00002533001	Hippocampus abundant transcript 1	0.133503	-1.04355
Cc04_g09420	GSCOC_T00022830001	Transcription factor bHLH137	0.385977	-0.78875
Cc04_g00420	GSCOC_T00021651001	Glutamate receptor	0.320753	-0.849538
Cc11_g09290	GSCOC_T00032756001	Pentatricopeptide repeat-containing mitochondrial	0.551026	-0.618507
Cc06_g03470	GSCOC_T00023631001	Probable WRKY transcription factor 34	0.317516	-0.84151
Cc06_g03440	GSCOC_T00023627001	Peroxiredoxin-like 2C	0.666008	-0.487346
Cc07_g00600	GSCOC_T00019138001	Ribosome-recycling factor	0.321723	-0.827933
Cc06_g03530	GSCOC_T00023638001	Pentatricopeptide repeat-containing chloroplastic	0.697213	-0.445244
Cc02_g01650	GSCOC_T00019993001	Zinc finger CONSTANS-LIKE 1	0.563817	-0.57314
Cc05_g14930	GSCOC_T00038757001	TIC 20- chloroplastic	0.93169	-0.20351
Cc02_g03830	GSCOC_T00020282001	Probable aminotransferase ACS12	0.265424	-0.869256
Cc11_g15580	GSCOC_T00038075001	Glutamate--glyoxylate aminotransferase 1	1.03751	-0.0848438
Cc03_g08100	GSCOC_T00033202001	Probable sucrose-phosphate synthase 2	0.561199	-0.558989
Cc07_g18910	GSCOC_T00018672001	tRNA-dihydrouridine(20 20a) synthase	0.716163	-0.397185
Cc06_g19130	GSCOC_T00028964001	Ferredoxin-dependent glutamate chloroplastic	0.196938	-0.912532
Cc06_g00310	GSCOC_T00023205001	Serine threonine- kinase chloroplastic	0.75661	-0.346127
Cc04_g08540	GSCOC_T00022716001	F-box At5g49610	0.535011	-0.562787
Cc08_g05310	GSCOC_T00024284001	Probable urea active transporter 1	0.671036	-0.42155
Cc02_g09310	GSCOC_T00029671001	homolog	0.786492	-0.299993
Cc06_g16900	GSCOC_T00004144001	GTP-binding homolog	0.512406	-0.572945
Cc08_g16330	GSCOC_T00035590001	Auxin response factor 18	0.736753	-0.340638
Cc07_g12610	GSCOC_T00036851001	Uncharacterized transporter sll0355	0.422653	-0.650025
Cc10_g12920	GSCOC_T00035366001	Maltose excess 1- chloroplastic	0.247472	-0.824849
Cc01_g14690	GSCOC_T00028478001	Gamma-interferon-inducible lysosomal thiol reductase	0.146909	-0.923957
Cc02_g21010	GSCOC_T00014732001	Peptidyl-prolyl cis-trans isomerase FKBP12	0.541242	-0.523082
Cc01_g13750	GSCOC_T00028352001	Uncharacterized RNA-binding	0.931746	-0.131724
Cc10_g14740	GSCOC_T00033620001	Fructose-	0.41615	-0.643938
Cc04_g13490	GSCOC_T00018274001	G-type lectin S-receptor-like serine threonine- kinase B120	0.345566	-0.712601
Cc10_g11890	GSCOC_T00031867001	Photosystem II 22 kDa chloroplastic	0.481469	-0.55921
Cc07_g09000	GSCOC_T00040293001	Thylakoid membrane slr0575	0.796158	-0.241524
Cc02_g21860	GSCOC_T00014835001	Dynamin ARC5	0.394473	-0.642468
Cc01_g18950	GSCOC_T00016126001	2-methyl-6-phytyl-	0.627161	-0.409605
Cc02_g06960	GSCOC_T00039252001	Sedoheptulose-	0.522726	-0.504019
Cc02_g05650	GSCOC_T00039078001	NRT1 PTR FAMILY	0.480639	-0.540824
Cc04_g03030	GSCOC_T00021990001	Homeobox-leucine zipper GLABRA 2	0.769701	-0.251237
Cc05_g08640	GSCOC_T00016891001	ATP-dependent zinc metalloprotease FTSH chloroplastic	0.508319	-0.511386
Cc02_g03450	GSCOC_T00020229001	ABC transporter B family member 28	0.799033	-0.214761
Cc00_g18540	GSCOC_T00008824001	Cytochrome P450 71A4	0.768429	-0.232302
Cc10_g11850	GSCOC_T00031862001	Long chain acyl- synthetase chloroplastic	0.769953	-0.217857
Cc02_g38200	GSCOC_T00027894001	Cysteine chloroplastic chromoplastic	0.205898	-0.779356
Cc09_g10270	GSCOC_T00041065001	Zeta-carotene desaturase	0.696991	-0.286723
Cc09_g09300	GSCOC_T00023067001	Mitochondrial carnitine acylcarnitine carrier	0.208334	-0.77504
Cc01_g15480	GSCOC_T00016556001	KH domain-containing At2g38610	0.769329	-0.206052
Cc08_g01180	GSCOC_T00038422001	Cytokinin dehydrogenase 7	0.25385	-0.719051
Cc09_g01120	GSCOC_T00017852001	DNA repair RAD5A	0.458833	-0.5126
Cc04_g15240	GSCOC_T00042292001	ABC transporter A family member 12	0.402411	-0.561507
Cc10_g00880	GSCOC_T00024548001	Large proline-rich BAG6	0.425564	-0.533927
Cc01_g17770	GSCOC_T00016283001	Photosystem II reaction center PSB28 chloroplastic	0.455432	-0.499885
Cc02_g23310	GSCOC_T00015020001	Prolycopene chloroplastic	0.533671	-0.419343
Cc02_g36400	GSCOC_T00003928001	Cytochrome P450 76C4	0.256452	-0.693845
Cc07_g13580	GSCOC_T00036719001	Glutathione S-transferase chloroplastic	0.513629	-0.426838
Cc07_g12660	GSCOC_T00036846001	Deglycase PH1704	0.498114	-0.441912
Cc02_g04840	GSCOC_T00020411001	Peptide methionine sulfoxide reductase	0.785761	-0.152092
Cc08_g00680	GSCOC_T00038483001	EIN3-binding F-box 1	0.395195	-0.54077
Cc02_g38610	GSCOC_T00027841001	E3 SUMO- ligase pli1	0.313893	-0.617539
Cc06_g11580	GSCOC_T00041641001	Regulatory NPR1	0.316785	-0.61381
Cc02_g17020	GSCOC_T00014205001	DETOXIFICATION chloroplastic	0.224192	-0.701155
Cc01_g13740	GSCOC_T00028351001	Helicase SKI2W	0.623513	-0.290644
Cc00_g14890	GSCOC_T00001459001	Two-pore potassium channel 3	0.344698	-0.567331
Cc03_g00260	GSCOC_T00025604001	Probable inactive serine threonine- kinase lvsG	0.24005	-0.668426
Cc01_g12870	GSCOC_T00028238001	Outer envelope pore chloroplastic	0.73437	-0.165656
Cc11_g15710	GSCOC_T00038089001	ABC transporter B family member chloroplastic	0.583185	-0.309846
Cc04_g05850	GSCOC_T00022352001	Mitochondrial import inner membrane translocase subunit tim16	0.508243	-0.384614
Cc02_g03780	GSCOC_T00020271001	Cysteine and histidine-rich domain-containing RAR1	0.549954	-0.338524
Cc09_g10760	GSCOC_T00041005001	Thioredoxin-like 1- chloroplastic	0.363279	-0.524095
Cc04_g07020	GSCOC_T00022503001	Uncharacterized RING finger	0.293087	-0.593345
Cc08_g00430	GSCOC_T00038523001	Extended synaptotagmin-3	0.301788	-0.583416
Cc08_g15490	GSCOC_T00035481001	F-box FBD LRR-repeat At3g52680	0.524602	-0.358608
Cc06_g05810	GSCOC_T00043147001	Heme-binding chloroplastic	0.303767	-0.574575
Cc03_g04260	GSCOC_T00026136001		0.682256	-0.189737
Cc01_g10500	GSCOC_T00024146001	Lactoylglutathione lyase	0.47137	-0.393018
Cc02_g26820	GSCOC_T00024987001	Major facilitator superfamily domain-containing 12	0.33176	-0.528823
Cc02_g02630	GSCOC_T00020123001	Short-chain dehydrogenase TIC chloroplastic	0.299472	-0.559577
Cc03_g00430	GSCOC_T00025624001	Dihydrolipoyl dehydrogenase mitochondrial	0.442143	-0.411706
Cc10_g13680	GSCOC_T00035251001	NAD(P)H-quinone oxidoreductase subunit chloroplastic	0.631974	-0.206444
Cc06_g05490	GSCOC_T00043102001	Monodehydroascorbate reductase	0.736953	-0.101448
Cc10_g05330	GSCOC_T00034822001	E3 ubiquitin- ligase XBAT34	0.427207	-0.408537
Cc10_g16230	GSCOC_T00033840001	Uncharacterized protein ycf45	0.438579	-0.396664
Cc05_g11550	GSCOC_T00021303001	Transcription elongation factor 1 homolog	0.161886	-0.671425
Cc07_g04610	GSCOC_T00039718001	Mini-ribonuclease 3	0.376552	-0.449637
Cc04_g00560	GSCOC_T00021674001	ATPase plasma membrane-type	0.558901	-0.262728
Cc02_g35170	GSCOC_T00042891001	Solute carrier family 40 member chloroplastic	0.505129	-0.312068
Cc08_g11330	GSCOC_T00027133001	(S)-ureidoglycine aminohydrolase	0.336249	-0.477095
Cc07_g01970	GSCOC_T00039376001	Phosphoenolpyruvate phosphate translocator chloroplastic	0.293529	-0.519743
Cc05_g13440	GSCOC_T00021064001	F-box LRR-repeat At3g59230	0.450622	-0.361653
Cc00_g09060	GSCOC_T00012319001	ABC transporter D family member chloroplastic	0.230029	-0.580467
Cc10_g00780	GSCOC_T00024537001	ATP-dependent zinc metalloprotease chloroplastic	0.373237	-0.43613
Cc11_g10810	GSCOC_T00032527001	Phosphoenolpyruvate carboxylase 4	0.528235	-0.274043
Cc01_g20440	GSCOC_T00015934001	Peptide chain release factor 1	0.25936	-0.537585
Cc06_g07370	GSCOC_T00031271001	Adenylate chloroplastic	0.561303	-0.232006
Cc04_g02950	GSCOC_T00021979001	Malonate-- ligase	0.160276	-0.629247
Cc02_g39680	GSCOC_T00027682001	Calcium-binding KIC	0.293279	-0.495979
Cc02_g28080	GSCOC_T00025171001	Carotenoid	0.145519	-0.643404
Cc11_g00610	GSCOC_T00004222001	Glyceraldehyde-3-phosphate dehydrogenase chloroplastic (Fragment)	0.657263	-0.128242
Cc08_g15060	GSCOC_T00035430001	Broad-range acid phosphatase DET1	0.196655	-0.586795
Cc08_g10700	GSCOC_T00027044001	UDP-sulfoquinovose chloroplastic	0.438366	-0.344777
Cc03_g15310	GSCOC_T00026809001	Acetolactate synthase small subunit	0.317031	-0.463479
Cc09_g10170	GSCOC_T00041081001	Glycerate dehydrogenase	0.170922	-0.60643
Cc06_g11780	GSCOC_T00041616001	Cleavage and polyadenylation specificity factor subunit 5	0.491463	-0.280775
Cc02_g09390	GSCOC_T00029660001	Uricase-2	0.277814	-0.493511
Cc01_g16950	GSCOC_T00016382001	E1A-binding p400	0.215801	-0.548986
Cc01_g09760	GSCOC_T00024042001	Probable phosphoglycerate mutase	0.186853	-0.574918
Cc02_g24740	GSCOC_T00028847001	Nuclear pore glyco p62	0.332122	-0.429427
Cc10_g16050	GSCOC_T00033815001	Eukaryotic translation initiation factor 2D	0.389132	-0.366482
Cc05_g00290	GSCOC_T00017056001	Uncharacterized oxidoreductase chloroplastic	0.258486	-0.489887
Cc06_g13490	GSCOC_T00041392001	FGGY carbohydrate kinase domain-containing	0.521341	-0.220808
Cc07_g09280	GSCOC_T00040326001	Outer envelope pore chloroplastic	0.53919	-0.19882
Cc07_g07940	GSCOC_T00040156001	Serine mitochondrial	0.10806	-0.62037
Cc01_g10220	GSCOC_T00024105001	Pheophorbide a chloroplastic	0.255151	-0.465108
Cc09_g05480	GSCOC_T00013390001	Beta-glucosidase 11	0.457002	-0.255313
Cc11_g08060	GSCOC_T00032926001	F-box SKIP28	0.326406	-0.381526
Cc03_g15350	GSCOC_T00026814001	(+)-pulegone reductase	0.362179	-0.344615
Cc06_g06940	GSCOC_T00031322001	Sucrose-phosphatase 1	0.239985	-0.464611
Cc07_g09740	GSCOC_T00037203001	Uncharacterized hydrolase	0.461885	-0.242687
Cc11_g10600	GSCOC_T00032557001	Serine threonine- kinase chloroplastic	0.400572	-0.303635
Cc00_g28630	GSCOC_T00013031001	NHL repeat-containing 2	0.314019	-0.38876
Cc11_g11830	GSCOC_T00032393001	Probable 6-phosphogluconolactonase 1	0.453743	-0.246347
Cc07_g19600	GSCOC_T00018543001	Xanthine dehydrogenase 1	0.386956	-0.311537
Cc08_g17180	GSCOC_T00035708001	Dicarboxylate transporter chloroplastic	0.309794	-0.388278
Cc05_g10170	GSCOC_T00021493001	Peroxisomal (S)-2-hydroxy-acid oxidase	0.501023	-0.196457
Cc10_g00510	GSCOC_T00024503001	Acetolactate synthase chloroplastic	0.158249	-0.537085
Cc07_g00870	GSCOC_T00019168001	50S ribosomal chloroplastic	0.181412	-0.513568
Cc05_g15320	GSCOC_T00038706001	Heat shock cognate 80	0.183659	-0.510338
Cc11_g05210	GSCOC_T00020462001	Glutamate decarboxylase 1	0.39975	-0.293799
Cc05_g16370	GSCOC_T00038571001	Phosphoglycerate chloroplastic	0.233207	-0.454337
Cc11_g02320	GSCOC_T00032989001	oxidoreductase GLYR1	0.262799	-0.423202
Cc05_g13720	GSCOC_T00021024001	1-acyl-sn-glycerol-3-phosphate acyltransferase	0.457652	-0.227815
Cc02_g15430	GSCOC_T00013989001	SAP BP-73	0.342015	-0.341372
Cc07_g10670	GSCOC_T00037087001	WD repeat-containing 82-B	0.33879	-0.344045
Cc08_g10720	GSCOC_T00027047001	ATP-dependent zinc metalloprotease FTSH mitochondrial	0.141304	-0.53993
Cc11_g14640	GSCOC_T00032031001	Deoxynucleoside triphosphate triphosphohydrolase SAMHD1 homolog	0.30046	-0.379072
Cc09_g10620	GSCOC_T00041022001	domain-containing GPI-anchored 2	0.292947	-0.386358
Cc01_g00030	GSCOC_T00012437001	Mediator of RNA polymerase II transcription subunit 13	0.20863	-0.459932
Cc03_g02760	GSCOC_T00025944001	Peptide methionine sulfoxide reductase chloroplastic	0.269548	-0.398106
Cc04_g00910	GSCOC_T00021719001	Probable complex I intermediate-associated 30	0.329005	-0.337727
Cc11_g07290	GSCOC_T00018071001	E3 ubiquitin ligase RIE1	0.37488	-0.291655
Cc04_g00540	GSCOC_T00021672001	15-cis-phytoene chloroplastic chromoplastic	0.192595	-0.470272
Cc11_g10310	GSCOC_T00032594001	Serine threonine- kinase PRP4 homolog	0.191617	-0.470932
Cc02_g11340	GSCOC_T00029423001	mRNA decapping complex subunit 2	0.394576	-0.266081
Cc00_g18890	GSCOC_T00011427001	ATP-dependent RNA helicase DBP2	0.30459	-0.355011
Cc02_g31750	GSCOC_T00027499001	Zeta-carotene chloroplastic chromoplastic	0.176339	-0.479215
Cc10_g15430	GSCOC_T00033723001	Glutathione transferase GST 23	0.385504	-0.267068
Cc09_g01440	GSCOC_T00017810001	Aspartic ase	0.394765	-0.255781
Cc10_g12990	GSCOC_T00035357001	domain-containing chloroplastic	0.501782	-0.147641
Cc02_g22880	GSCOC_T00014966001	Uncharacterized protein At4g06598	0.338999	-0.310299
Cc07_g01130	GSCOC_T00019201001	Acyltransferase chloroplastic	0.437001	-0.206733
Cc01_g10030	GSCOC_T00024082001	Magnesium transporter MRS2- chloroplastic	0.447497	-0.196021
Cc08_g02330	GSCOC_T00037700001	Pyruvate kinase isozyme chloroplastic	0.441563	-0.20193
Cc01_g06630	GSCOC_T00030058001	UPF0051 slr0074	0.378413	-0.262949
Cc11_g09830	GSCOC_T00032665001	Endoribonuclease LACTB2	0.270452	-0.36743
Cc02_g16260	GSCOC_T00014108001	L-ascorbate peroxidase 3	0.303882	-0.332824
Cc09_g03200	GSCOC_T00017579001	Violaxanthin de- chloroplastic	0.450396	-0.178342
Cc04_g08440	GSCOC_T00022703001	Probable metal-nicotianamine transporter YSL8	0.285069	-0.341064
Cc06_g02100	GSCOC_T00023452001	DEAD-box ATP-dependent RNA helicase 33	0.270899	-0.352344
Cc02_g39690	GSCOC_T00027680001	Serine arginine-rich splicing factor RS31	0.225975	-0.396471
Cc06_g07410	GSCOC_T00031264001	Homeobox knotted-1-like 4	0.120342	-0.493767
Cc05_g12140	GSCOC_T00021228001	Thioredoxin chloroplastic	0.163785	-0.446714
Cc09_g10750	GSCOC_T00041006001	NLP2	0.299889	-0.309957
Cc11_g17490	GSCOC_T00038321001	Uncharacterized protein At2g33490	0.325057	-0.277034
Cc05_g12730	GSCOC_T00021152001	Cyclic nucleotide-gated ion channel 4	0.402484	-0.195761
Cc08_g09240	GSCOC_T00017269001	Tocopherol chloroplastic	0.336832	-0.260328
Cc00_g14310	GSCOC_T00011140001	NADP-dependent D-sorbitol-6-phosphate dehydrogenase	0.214354	-0.380867
Cc06_g03420	GSCOC_T00023625001	Pentatricopeptide repeat-containing chloroplastic	0.396703	-0.197922
Cc03_g00400	GSCOC_T00025619001	Vacuolar sorting-associated 13C	0.220472	-0.372079
Cc02_g37560	GSCOC_T00027974001	(+)-neomenthol dehydrogenase	0.398277	-0.192537
Cc02_g04300	GSCOC_T00020341001	Luc7 3	0.302126	-0.287912
Cc04_g07730	GSCOC_T00022607001	Probable phospholipid-transporting ATPase 12	0.246884	-0.343146
Cc02_g04620	GSCOC_T00020379001	U-box domain-containing 35	0.394501	-0.194474
Cc07_g06970	GSCOC_T00040028001	BTB POZ domain-containing NPY2	0.283623	-0.301165
Cc10_g09510	GSCOC_T00031534001	DEAD-box ATP-dependent RNA helicase 42	0.271199	-0.313153
Cc02_g18700	GSCOC_T00014422001	Autophagy-related 2	0.385352	-0.198686
Cc11_g15270	GSCOC_T00038036001	Phosphatidylinositol 3- root isoform	0.232565	-0.34911
Cc06_g09380	GSCOC_T00041923001	Iron-sulfur cluster carrier	0.266506	-0.314957
Cc06_g14490	GSCOC_T00041250001	50S ribosomal chloroplastic	0.227297	-0.350216
Cc01_g10600	GSCOC_T00024160001	Cell division cycle 48 homolog	0.143761	-0.424444
Cc02_g23020	GSCOC_T00014981001	ATP-dependent RNA helicase dhx29	0.162905	-0.403325
Cc07_g01470	GSCOC_T00019245001	Acetyl-coenzyme A chloroplastic glyoxysomal	0.235281	-0.323568
Cc03_g00520	GSCOC_T00025634001	Chaperone	0.330075	-0.2251
Cc01_g11990	GSCOC_T00028118001	Nuclear factor related to kappa-B-binding	0.271193	-0.28191
Cc07_g05860	GSCOC_T00039870001	Transmembrane 131-like	0.181089	-0.371789
Cc07_g03430	GSCOC_T00039572001	Granule-bound starch synthase chloroplastic amyloplastic	0.312907	-0.238214
Cc01_g18820	GSCOC_T00016150001	Glutathione chloroplastic (Fragment)	0.179449	-0.360107
Cc08_g00460	GSCOC_T00038519001	Ubiquitin carboxyl-terminal hydrolase 13	0.215748	-0.3222
Cc05_g07750	GSCOC_T00016774001	Homeobox-leucine zipper ROC8	0.233067	-0.301944
Cc06_g21410	GSCOC_T00018159001	Transcription elongation factor SPT6	0.17072	-0.363773
Cc03_g00650	GSCOC_T00025651001	Flowering time control FCA	0.347641	-0.18618
Cc02_g01640	GSCOC_T00019991001	Nuclear migration nudC	0.148825	-0.38408
Cc10_g00990	GSCOC_T00024562001	Enoyl- hydratase peroxisomal	0.26723	-0.26462
Cc02_g17960	GSCOC_T00014327001	4-hydroxy-3-methylbut-2-enyl diphosphate chloroplastic	0.408966	-0.122568
Cc07_g07360	GSCOC_T00040085001	Peroxiredoxin-like 2C	0.360148	-0.168388
Cc00_g22720	GSCOC_T00002422001	Nucleolysin TIAR	0.354462	-0.173601
Cc02_g30700	GSCOC_T00023810001	mediator of RNA polymerase II transcription subunit 14	0.276543	-0.251277
Cc08_g00320	GSCOC_T00005591001	Calcium uptake mitochondrial	0.324419	-0.203135
Cc07_g14540	GSCOC_T00036602001	ATP-dependent RNA helicase chloroplastic	0.330411	-0.19489
Cc10_g16400	GSCOC_T00013396001	Carbamoyl-phosphate synthase large chain	0.158679	-0.363049
Cc10_g11030	GSCOC_T00016666001	DIS3-like exonuclease 2	0.282844	-0.234544
Cc07_g08270	GSCOC_T00040196001	ATP-dependent Clp protease proteolytic subunit 3	0.184353	-0.329015
Cc09_g00310	GSCOC_T00017964001	Sister chromatid cohesion PDS5 homolog B	0.236817	-0.271274
Cc02_g13850	GSCOC_T00029088001	DDT domain-containing DDB_G0282237	0.309821	-0.196893
Cc09_g03800	GSCOC_T00017501001	Thioredoxin chloroplastic	0.205017	-0.300102
Cc06_g23280	GSCOC_T00040594001	Photosystem II 5 kDa chloroplastic	0.367253	-0.137265
Cc02_g22490	GSCOC_T00014920001	Ankyrin repeat domain-containing 2A	0.240166	-0.263565
Cc06_g04350	GSCOC_T00023751001	Probable FAD synthase	0.291907	-0.20694
Cc05_g15990	GSCOC_T00038617001	Pentatricopeptide repeat-containing chloroplastic	0.205549	-0.292918
Cc00_g12880	GSCOC_T00002616001	Vacuolar fusion MON1 homolog A	0.236896	-0.260961
Cc06_g07540	GSCOC_T00031249001	Uncharacterized methyltransferase chloroplastic	0.255977	-0.240986
Cc01_g12660	GSCOC_T00028208001	Inner membrane PPF- chloroplastic	0.184709	-0.310714
Cc02_g18140	GSCOC_T00014350001	Proteasome assembly chaperone 2	0.304334	-0.187811
Cc02_g31420	GSCOC_T00027567001	Rubredoxin	0.262335	-0.229692
Cc01_g12880	GSCOC_T00028239001	Probable aldo-keto reductase 2	0.311728	-0.172032
Cc08_g07250	GSCOC_T00025339001	Phospholipid hydroperoxide glutathione chloroplastic	0.255789	-0.227866
Cc02_g00120	GSCOC_T00019787001	Bromodomain adjacent to zinc finger domain 1A	0.24343	-0.239476
Cc00_g02330	GSCOC_T00004268001	Jade-1	0.318047	-0.161245
Cc05_g15580	GSCOC_T00038672001	Proteasome activator complex subunit 4	0.268796	-0.208502
Cc10_g01430	GSCOC_T00024614001	Vacuolar sorting-associated 35B	0.200332	-0.276805
Cc02_g33370	GSCOC_T00015366001	Probable Xaa-Pro aminopeptidase P	0.17338	-0.301845
Cc09_g06230	GSCOC_T00033341001	Phosphatase chloroplastic	0.25064	-0.221983
Cc01_g13280	GSCOC_T00028293001	Chaperone	0.30363	-0.164079
Cc08_g01730	GSCOC_T00038341001	Transcription factor ICE1	0.220381	-0.246488
Cc06_g01300	GSCOC_T00023345001	Symplekin	0.191281	-0.273959
Cc02_g10850	GSCOC_T00029483001	Serine carboxypeptidase-like 49	0.209561	-0.251431
Cc02_g35610	GSCOC_T00042823001	FACT complex subunit SPT16	0.279779	-0.180028
Cc11_g14950	GSCOC_T00001038001	Peptidyl-prolyl cis-trans isomerase chloroplastic	0.305851	-0.152975
Cc03_g01480	GSCOC_T00025760001	Multiple organellar RNA editing factor chloroplastic mitochondrial	0.296273	-0.162494
Cc01_g20490	GSCOC_T00015927001	MORC family CW-type zinc finger 4	0.251351	-0.19803
Cc04_g05220	GSCOC_T00022269001	Probable phosphatase 2C 21	0.249752	-0.19934
Cc05_g08080	GSCOC_T00016818001	Transcription factor GTE4	0.233789	-0.215162
Cc02_g04460	GSCOC_T00020360001	Branchpoint-bridging	0.237648	-0.207286
Cc02_g05460	GSCOC_T00039055001	Superoxide dismutas	0.200981	-0.238723
Cc03_g16020	GSCOC_T00001667001	Probable thiol methyltransferase 2	0.226431	-0.20492
Cc06_g10390	GSCOC_T00041785001	Flavonol synthase flavanone 3-hydroxylase (Fragment)	0.222819	-0.206778
Cc07_g10710	GSCOC_T00037083001	Transcription-associated 1	0.163634	-0.256982
Cc06_g09260	GSCOC_T00041937001	homolog subfamily C member 13	0.27639	-0.141443
Cc07_g13590	GSCOC_T00036717001	DELLA GAI	0.23274	-0.180811
Cc02_g21760	GSCOC_T00014822001	High affinity sulfate transporter 1	0.256058	-0.156164
Cc04_g03750	GSCOC_T00022079001	Molybdate transporter 2	0.199064	-0.211073
Cc04_g15130	GSCOC_T00002596001	Ribulose-phosphate 3- chloroplastic (Fragment)	0.118067	-0.290602
Cc11_g12370	GSCOC_T00032327001	GDAP2 homolog	0.221576	-0.183148
Cc07_g00520	GSCOC_T00019126001	Transcription factor GTE8	0.262598	-0.142064
Cc09_g10720	GSCOC_T00041011001	Aminoacylase-1	0.25227	-0.152203
Cc03_g05900	GSCOC_T00026362001	50S ribosomal chloroplastic	0.275302	-0.128735
Cc11_g00260	GSCOC_T00019454001	Histone acetyltransferase HAC1	0.217928	-0.182848
Cc04_g03440	GSCOC_T00022039001	Heat shock 70 kDa 15	0.295971	-0.0953201
Cc01_g00290	GSCOC_T00012404001	Pyruvate cytosolic isozyme	0.20774	-0.183266
Cc07_g00760	GSCOC_T00019155001	SWI SNF complex component SNF12 homolog	0.197451	-0.193203
Cc06_g15040	GSCOC_T00030888001	Purine permease 1	0.284474	-0.105544
Cc09_g06170	GSCOC_T00033350001	Lecithin-cholesterol acyltransferase-like 4	0.239896	-0.149027
Cc02_g35860	GSCOC_T00042781001	Aspartic ase oryzasin-1	0.279784	-0.107948
Cc02_g08850	GSCOC_T00029742001	Exportin-4	0.223221	-0.15138
Cc03_g02940	GSCOC_T00025967001	Glutamine synthetase leaf chloroplastic	0.175209	-0.190532
Cc00_g09120	GSCOC_T00012326001	Nuclear-pore anchor	0.20093	-0.160836
Cc00_g03790	GSCOC_T00004285001	Probable glutathione peroxidase 2	0.221145	-0.137996
Cc06_g08140	GSCOC_T00031168001	TBC1 domain family member 15	0.224755	-0.13338
Cc05_g15840	GSCOC_T00038640001	Peroxisome biogenesis 5	0.187072	-0.17051
Cc06_g03770	GSCOC_T00023673001	Valine--tRNA mitochondrial 1	0.145725	-0.210393
Cc08_g09910	GSCOC_T00026946001	Mitochondrial import inner membrane translocase subunit Tim17-B	0.199031	-0.148598
Cc02_g37280	GSCOC_T00028012001	Peroxisomal membrane 11D	0.189645	-0.155418
Cc07_g12120	GSCOC_T00036918001	Eukaryotic translation initiation factor 6-2	0.184263	-0.14805
Cc05_g05330	GSCOC_T00035100001	Histone-lysine N-methyltransferase ATXR3	0.189777	-0.138335
Cc05_g02050	GSCOC_T00040811001	Uncharacterized RNA-binding	0.194506	-0.126416
Cc02_g11330	GSCOC_T00029425001	Endoplasmic reticulum metallopeptidase 1	0.163157	-0.145275
Cc10_g01120	GSCOC_T00024578001	Thioredoxin chloroplastic	0.13981	-0.145095
Cc03_g04990	GSCOC_T00026233001	TNF receptor-associated factor homolog 1a	0.158451	-0.115879
Cc02_g16240	GSCOC_T00014106001	E3 ubiquitin- ligase UPL3	0.137042	-0.118343

## Sheet: up-regulation
Gene ID	ORF Name	Protein Name	Icatu-Fold Change	CL153-Fold Change
Cc02_g03430	GSCOC_T00020227001	Dehydration-responsive element-binding 1B	-4.42839	4.371
Cc02_g27160	GSCOC_T00025036001	Vicianin hydrolase (Fragment)	-5.69986	2.82126
Cc01_g07390	GSCOC_T00030175001	Alcohol dehydrogenase-like 7	-3.11239	3.42664
Cc02_g32480	GSCOC_T00001240001	Sugar transporter ERD6-like 8	-4.33442	1.52652
Cc11_g16200	GSCOC_T00038155001	Probable pectate lyase 5	-1.06368	3.95998
Cc03_g07230	GSCOC_T00026566001	Probable pectate lyase 15	-1.96519	2.72621
Cc02_g14530	GSCOC_T00013864001	GDSL esterase lipase At1g28570	-2.74165	1.94853
Cc00_g33180	GSCOC_T00003246001	Endochitinase B	-1.33011	3.07659
Cc02_g11550	GSCOC_T00029398001	Tryptophan synthase beta chain chloroplastic	-1.24125	3.09792
Cc00_g14300	GSCOC_T00010613001	Basic endochitinase	-0.865833	3.36966
Cc10_g14270	GSCOC_T00012017001	Pathogen-related	-2.38906	1.55185
Cc00_g35890	GSCOC_T00005696001	Polyphenol oxidase chloroplastic	-2.00399	1.87782
Cc02_g16600	GSCOC_T00014153001	Snakin-2	-0.714024	3.095
Cc07_g13110	GSCOC_T00036787001	Ethylene-responsive transcription factor 1B	-2.00413	1.76941
Cc08_g01530	GSCOC_T00038372001	Beta-amylase chloroplastic	-1.65123	1.92495
Cc06_g09860	GSCOC_T00041858001	Rho guanine nucleotide exchange factor 8	-1.46994	2.05018
Cc02_g27550	GSCOC_T00025086001	DNA damage-repair toleration DRT100	-0.767316	2.58461
Cc00_g17550	GSCOC_T00012275001	Peroxidase 3	-1.37317	1.91749
Cc01_g14960	GSCOC_T00016621001	F-box LRR-repeat 3	-1.3584	1.78567
Cc11_g04040	GSCOC_T00034028001	Acidic endochitinase	-0.794001	2.29634
Cc08_g03500	GSCOC_T00034131001	Alpha beta hydrolase domain-containing 17B	-1.51903	1.55622
Cc07_g11550	GSCOC_T00036989001	Endochitinase	-0.70941	2.30653
Cc09_g03130	GSCOC_T00017586001	GDSL esterase lipase At5g33370	-0.59723	2.38519
Cc04_g10740	GSCOC_T00042644001	Probable pectate lyase 22	-0.492092	2.40509
Cc07_g12890	GSCOC_T00036818001	B3 domain-containing REM17	-0.83759	2.03314
Cc07_g15430	GSCOC_T00036477001	Epidermis-specific secreted glyco EP1	-1.1071	1.68746
Cc02_g36000	GSCOC_T00042762001	Transcription factor MYB86	-0.890779	1.8544
Cc02_g14280	GSCOC_T00013835001	GDSL esterase lipase At5g45950	-0.368789	2.34936
Cc06_g23480	GSCOC_T00040562001	Leucine-rich repeat extensin 2	-0.464564	2.22571
Cc03_g03610	GSCOC_T00026054001	Polyamine aminopropyltransferase	-1.54075	1.09748
Cc02_g35040	GSCOC_T00011816001	Nicotianamine synthase	-0.849247	1.75357
Cc02_g19060	GSCOC_T00014469001	CBS domain-containing chloroplastic	-1.31657	1.27759
Cc07_g10690	GSCOC_T00037085001	WEB family At2g17940	-0.834003	1.7489
Cc01_g00720	GSCOC_T00011062001		-1.59011	0.947812
Cc05_g09640	GSCOC_T00021558001	Probable receptor kinase At2g42960	-0.623322	1.90177
Cc01_g12960	GSCOC_T00028253001	Expansin-A4	-0.161767	2.31904
Cc04_g01940	GSCOC_T00021859001	HOTHEAD	-0.299916	2.17258
Cc06_g21200	GSCOC_T00034059001	Metacaspase-9	-1.45469	0.967577
Cc02_g36950	GSCOC_T00003852001	Nectarin-1	-0.539918	1.87289
Cc00_g08090	GSCOC_T00006943001	Deacetylvindoline O-acetyltransferase	-0.36414	2.03041
Cc00_g04110	GSCOC_T00013741001	Cysteine protease XCP1	-1.69834	0.676935
Cc07_g18060	GSCOC_T00018808001	UDP-glucuronate:xylan alpha-glucuronosyltransferase 1	-0.680152	1.65413
Cc11_g13780	GSCOC_T00032138001	Exocyst complex component 8	-0.567888	1.75096
Cc00_g27280	GSCOC_T00007367001	Probable pectate lyase 13	-1.05182	1.26089
Cc05_g13200	GSCOC_T00021094001	Probable galacturonosyltransferase 12	-0.426858	1.87783
Cc05_g07830	GSCOC_T00016787001	Fasciclin-like arabinogalactan 6	-0.516222	1.78341
Cc07_g06180	GSCOC_T00039914001	Filament-like plant 7	-0.504668	1.79221
Cc00_g14920	GSCOC_T00001123001	Germin 1-2	-0.345544	1.94296
Cc01_g17930	GSCOC_T00016263001	Cellulose synthase A catalytic subunit	-0.373977	1.91109
Cc00_g27590	GSCOC_T00007291001	Kirola	-0.715086	1.47715
Cc07_g06870	GSCOC_T00040013001	Peroxidase 73	-1.56706	0.601406
Cc11_g11470	GSCOC_T00032442001	DNA-3-methyladenine glycosylase	-0.550134	1.61568
Cc08_g16000	GSCOC_T00035548001	Endoglucanase 6	-1.07959	1.08277
Cc04_g05600	GSCOC_T00022320001	Germin subfamily 3 member 4	-1.19023	0.946777
Cc00_g12590	GSCOC_T00011634001	Cytochrome P450 81D1	-0.871797	1.25496
Cc01_g14770	GSCOC_T00028487001	UDP-glycosyltransferase 87A2	-0.740987	1.35648
Cc02_g00760	GSCOC_T00019870001	Caffeic acid 3-O-methyltransferase	-0.327758	1.76507
Cc04_g02840	GSCOC_T00021966001	Aquaporin TIP2-1	-0.416857	1.66386
Cc02_g13480	GSCOC_T00029145001	Pistil-specific extensin	-0.183936	1.89169
Cc05_g11460	GSCOC_T00021312001	Vacuolar cation proton exchanger 5	-1.15428	0.917728
Cc11_g15300	GSCOC_T00038040001	Probable polygalacturonase At1g80170	-1.34821	0.712861
Cc03_g03480	GSCOC_T00026038001	Probable membrane-associated kinase regulator 1	-1.39086	0.669392
Cc06_g22790	GSCOC_T00040668001	Alpha-L-arabinofuranosidase 1	-1.38903	0.6591
Cc01_g14620	GSCOC_T00028468001	Inactive receptor-like serine threonine- kinase At2g40270	-0.305582	1.73162
Cc08_g03510	GSCOC_T00034133001	Cellulose synthase D3	-0.575738	1.44065
Cc01_g03970	GSCOC_T00040873001	Isoflavone reductase homolog P3	-0.572399	1.44202
Cc02_g16640	GSCOC_T00014157001	Probable aquaporin PIP-type pTOM75	-0.638501	1.37372
Cc02_g27240	GSCOC_T00025049001	Beta-glucosidase 10	-0.896927	1.11205
Cc11_g11400	GSCOC_T00032449001	Sodium-coupled neutral amino acid transporter 2	-1.56594	0.416828
Cc02_g06730	GSCOC_T00039216001	Anthranilate synthase alpha subunit chloroplastic	-1.39917	0.580487
Cc06_g15380	GSCOC_T00030836001	Alpha beta hydrolase domain-containing 17C	-1.07012	0.878719
Cc02_g16400	GSCOC_T00014125001	Glycine-rich 2	-1.12933	0.79847
Cc02_g04740	GSCOC_T00020396001	Ethylene-responsive transcription factor 2	-0.90262	1.00556
Cc11_g10580	GSCOC_T00032559001	Probable galacturonosyltransferase-like 3	-1.07969	0.793846
Cc03_g09600	GSCOC_T00030944001	Transcription factor bHLH77	-1.41261	0.435673
Cc06_g12680	GSCOC_T00041507001	Sucrose synthase	-0.441583	1.40346
Cc10_g09820	GSCOC_T00031496001	Germin subfamily 1 member 13	-0.835257	0.999928
Cc10_g01640	GSCOC_T00024647001	Tubulin beta-1 chain	-1.22851	0.588306
Cc06_g16710	GSCOC_T00004122001	Leucine-rich repeat receptor-like tyrosine- kinase PXC3	-1.03447	0.767861
Cc07_g05170	GSCOC_T00039781001	Probable galacturonosyltransferase-like 1	-0.474736	1.31989
Cc01_g02930	GSCOC_T00013234001	G-type lectin S-receptor-like serine threonine- kinase SD1-13	-0.769248	1.02182
Cc07_g17530	GSCOC_T00008836001	Probable cinnamyl alcohol dehydrogenase 9	-0.577045	1.21315
Cc02_g05420	GSCOC_T00039050001	Expansin-A4	-0.15151	1.61427
Cc03_g08490	GSCOC_T00033270001	Adenosylhomocysteinase	-0.799364	0.929052
Cc00_g03730	GSCOC_T00013259001	SRG1	-0.979832	0.746425
Cc10_g05010	GSCOC_T00034863001	Pollen-specific SF3	-0.747621	0.97609
Cc00_g13780	GSCOC_T00013301001	Probable saccharopine dehydrogenas	-1.09491	0.62855
Cc08_g06480	GSCOC_T00036038001	Probable sarcosine oxidase	-0.938016	0.782143
Cc07_g10170	GSCOC_T00037152001	3-epi-6-deoxocathasterone 23-monooxygenase CYP90C1	-1.50222	0.216347
Cc00_g35780	GSCOC_T00008950001	Germin subfamily 1 member 7	-0.565496	1.14961
Cc07_g13350	GSCOC_T00036754001	Probable inactive receptor kinase At5g16590	-0.28116	1.42761
Cc07_g07060	GSCOC_T00040040001	BTB POZ domain-containing At3g49900	-0.586748	1.10343
Cc08_g07270	GSCOC_T00025342001	Probable LRR receptor-like serine threonine- kinase At1g14390	-0.2163	1.45433
Cc11_g08030	GSCOC_T00032930001	TIFY 6B	-0.113511	1.55087
Cc09_g09880	GSCOC_T00005755001	Aquaporin PIP2-7	-0.150842	1.50728
Cc00_g13770	GSCOC_T00013300001	Alpha-aminoadipic semialdehyde mitochondrial	-1.04395	0.613171
Cc04_g10080	GSCOC_T00042543001	Malate glyoxysomal	-1.04615	0.602902
Cc04_g04360	GSCOC_T00022160001	LURP-one-related 12	-1.40397	0.233338
Cc01_g10430	GSCOC_T00024139001	Serine carboxypeptidase-like 48	-0.96755	0.645051
Cc01_g11610	GSCOC_T00028065001	LOB domain-containing 1	-0.930228	0.678559
Cc09_g00490	GSCOC_T00017943001	Microtubule-associated 70-5	-0.741531	0.851221
Cc10_g11120	GSCOC_T00016685001	Auxin transporter 5	-1.28736	0.300385
Cc06_g20040	GSCOC_T00022900001	Tubulin beta-1 chain	-0.360341	1.21532
Cc08_g01540	GSCOC_T00038371001	Poly(U)-specific endoribonuclease-B	-0.941239	0.628582
Cc00_g13050	GSCOC_T00010498001	Glutamate dehydrogenase A	-0.566396	0.999509
Cc11_g08090	GSCOC_T00032922001	PLANT CADMIUM RESISTANCE 2	-0.207681	1.35523
Cc11_g05720	GSCOC_T00020540001	65-kDa microtubule-associated 7	-1.14803	0.41228
Cc02_g12360	GSCOC_T00029292001	Sugar carrier C	-0.624129	0.930375
Cc07_g03250	GSCOC_T00039548001	ABC transporter B family member 19	-0.999107	0.547392
Cc07_g08550	GSCOC_T00040232001	Probable non-specific lipid-transfer AKCS9	-0.527111	1.01668
Cc01_g10300	GSCOC_T00024117001	Aquaporin TIP1-1	-0.467079	1.06754
Cc09_g03670	GSCOC_T00017517001	Isopentenyl-diphosphate Delta-isomerase II	-0.301966	1.22352
Cc01_g16120	GSCOC_T00016479001	Fimbrin-5	-0.550172	0.957215
Cc02_g12060	GSCOC_T00029336001	Receptor-like serine threonine- kinase SD1-8	-0.467972	1.01017
Cc02_g24310	GSCOC_T00002340001	lipid-binding At4g00165	-0.902494	0.568574
Cc04_g13860	GSCOC_T00035901001	Metal tolerance A2	-0.855839	0.608983
Cc07_g15380	GSCOC_T00036482001	Probable trehalose-phosphate phosphatase J	-0.954122	0.503192
Cc11_g16050	GSCOC_T00038134001	Endoglucanase E1	-0.77668	0.680195
Cc08_g05190	GSCOC_T00042434001	Probable methyltransferase PMT20	-0.530818	0.909426
Cc02_g00770	GSCOC_T00019871001	Flavanone 3-dioxygenase	-0.939079	0.499328
Cc02_g34330	GSCOC_T00000673001	Bidirectional sugar transporter SWEET17	-0.618547	0.812111
Cc01_g13210	GSCOC_T00028284001	BAG family molecular chaperone regulator 1	-0.200219	1.20958
Cc04_g02380	GSCOC_T00021909001	GDSL esterase lipase APG	-0.555789	0.835969
Cc06_g01510	GSCOC_T00023372001	Auxin transporter 2	-0.327269	1.06239
Cc02_g25260	GSCOC_T00028772001	Cyclin-U4-1	-1.11177	0.276811
Cc11_g00210	GSCOC_T00019446001	BTB POZ domain-containing At3g19850	-0.671909	0.708202
Cc00_g14150	GSCOC_T00009209001	COBRA	-0.497083	0.875661
Cc10_g07860	GSCOC_T00034472001	Endo-	-0.867141	0.501601
Cc03_g05800	GSCOC_T00026349001	Long-chain-alcohol oxidase FAO1	-0.175031	1.17818
Cc09_g02830	GSCOC_T00017624001	IQ-DOMAIN 14	-0.312856	1.02991
Cc00_g22250	GSCOC_T00007434001	Blue copper	-0.534911	0.803952
Cc02_g06630	GSCOC_T00039205001	Cytochrome P450 90A1	-1.08235	0.251496
Cc02_g05990	GSCOC_T00039121001	Abscisic acid receptor PYL4	-0.772572	0.558829
Cc02_g27290	GSCOC_T00025056001	Furcatin hydrolase	-0.662645	0.666605
Cc02_g37030	GSCOC_T00028045001	Subtilisin-like protease	-1.03024	0.293614
Cc07_g14030	GSCOC_T00036664001	Nucleobase-ascorbate transporter 11	-0.199625	1.11399
Cc07_g21290	GSCOC_T00011168001	Fructokinase-2	-0.34647	0.961033
Cc11_g10230	GSCOC_T00032605001	Alpha-xylosidase 1	-1.04122	0.257207
Cc11_g10520	GSCOC_T00032567001	Two-component response regulator ARR18	-0.468421	0.799857
Cc06_g16430	GSCOC_T00030694001	Exo-poly-alpha-D-galacturonosidase	-0.91345	0.350694
Cc01_g00220	GSCOC_T00012412001	Probable serine threonine- kinase PBL16	-0.513344	0.732109
Cc02_g05790	GSCOC_T00039098001	Wound-induced 1	-0.593217	0.63948
Cc06_g13210	GSCOC_T00041428001	Afadin- and alpha-actinin-binding	-0.36704	0.859233
Cc08_g14210	GSCOC_T00030254001	Bifunctional UDP-glucose 4-epimerase and UDP-xylose 4-epimerase 1	-0.631163	0.584124
Cc07_g11130	GSCOC_T00037035001	MID1-COMPLEMENTING ACTIVITY 1	-0.240158	0.974048
Cc07_g10030	GSCOC_T00037166001	Dehydrin Xero 1	-0.36645	0.842064
Cc01_g20580	GSCOC_T00015916001	Glutathione S-transferase	-0.236621	0.94975
Cc01_g09840	GSCOC_T00024054001	Uncharacterized protein At4g22758	-0.39914	0.786592
Cc01_g18160	GSCOC_T00016239001	Serine threonine- kinase 38-like	-0.576766	0.601839
Cc06_g10650	GSCOC_T00041752001	Profilin-1	-0.435009	0.728159
Cc07_g07670	GSCOC_T00040122001	Probable hexokinase-like 2	-0.592967	0.569261
Cc02_g13790	GSCOC_T00029096001	E6	-0.293174	0.868301
Cc11_g10560	GSCOC_T00032561001	AP2 ERF and B3 domain-containing transcription repressor TEM1	-0.932108	0.21411
Cc06_g16920	GSCOC_T00004148001	Guanylate kinase	-0.26874	0.863314
Cc04_g06040	GSCOC_T00022383001	Probable inactive receptor kinase At1g48480	-0.220939	0.898
Cc08_g03300	GSCOC_T00010789001	Lysine-specific demethylase REF6	-0.470082	0.621951
Cc02_g06790	GSCOC_T00039229001	Nematode resistance -like HSPRO2	-0.435527	0.651674
Cc02_g32420	GSCOC_T00001250001	Histidine-containing phosphotransfer 1	-0.724072	0.359867
Cc07_g01890	GSCOC_T00039367001	Probable ATP-dependent DNA helicase HFM1	-0.730854	0.352855
Cc09_g04660	GSCOC_T00017398001	DNA-3-methyladenine glycosylase 1	-0.628508	0.426056
Cc07_g10330	GSCOC_T00037131001	Leucine-rich repeat receptor kinase PEPR2	-0.27071	0.774655
Cc09_g04880	GSCOC_T00007056001	Vacuolar-sorting receptor 6	-0.5921	0.449888
Cc00_g17060	GSCOC_T00008777001	Probable xyloglucan endotransglucosylase hydrolase 28	-0.607744	0.431098
Cc09_g08040	GSCOC_T00003802001	Homeobox-leucine zipper ATHB-14	-0.509582	0.518732
Cc03_g03540	GSCOC_T00026045001	Mavicyanin	-0.567332	0.457702
Cc01_g07640	GSCOC_T00015431001	Transcription factor bHLH157	-0.6185	0.376714
Cc08_g15980	GSCOC_T00035545001	Ethylene-responsive transcription factor ERF061	-0.628511	0.342177
Cc06_g07640	GSCOC_T00031237001	OS-9	-0.652168	0.310466
Cc08_g13580	GSCOC_T00030326001	Probable sugar phosphate phosphate translocator At1g12500	-0.297635	0.661506
Cc01_g14270	GSCOC_T00028423001	Phosphoinositide phospholipase C 4	-0.202853	0.750121
Cc03_g02250	GSCOC_T00025863001	RING finger and CHY zinc finger domain-containing 1	-0.394067	0.537286
Cc03_g10700	GSCOC_T00041994001	Probably inactive leucine-rich repeat receptor kinase At3g28040	-0.355346	0.574318
Cc03_g03580	GSCOC_T00026050001	Linoleate 9S-lipoxygenase 5	-0.626782	0.292295
Cc01_g16420	GSCOC_T00016444001	Peptidyl-prolyl cis-trans isomerase FKBP15-1	-0.380202	0.527635
Cc02_g32230	GSCOC_T00012957001	Sodium hydrogen exchanger 2	-0.308297	0.588205
Cc06_g22970	GSCOC_T00040644001	Glutamate dehydrogenase B	-0.278413	0.608852
Cc00_g18380	GSCOC_T00005502001	Momilactone A synthase	-0.340807	0.545709
Cc08_g14480	GSCOC_T00030217001	Probable LRR receptor-like serine threonine- kinase At1g63430	-0.285565	0.597598
Cc06_g10190	GSCOC_T00041818001	Sugar transport 14	-0.550537	0.330715
Cc06_g07770	GSCOC_T00031218001	Pyrophosphate-energized vacuolar membrane proton pump	-0.341673	0.537882
Cc02_g16310	GSCOC_T00014113001	Actin-depolymerizing factor 5	-0.500851	0.364643
Cc04_g10400	GSCOC_T00042588001	Cucumisin	-0.623181	0.236706
Cc10_g07420	GSCOC_T00034524001	FBD-associated F-box At5g22730	-0.485112	0.372607
Cc07_g19530	GSCOC_T00018561001	Filament-like plant 3	-0.537302	0.317403
Cc08_g02120	GSCOC_T00037673001	Type I inositol polyphosphate 5-phosphatase 2	-0.374177	0.474928
Cc05_g13650	GSCOC_T00021035001	Calcium-dependent kinase 19	-0.31606	0.532337
Cc11_g09660	GSCOC_T00032691001	Probable inactive leucine-rich repeat receptor kinase At1g66830	-0.528623	0.314835
Cc05_g06420	GSCOC_T00042132001	Probable galacturonosyltransferase 10	-0.271371	0.566815
Cc01_g15260	GSCOC_T00016584001	UDP-xylose transporter 3	-0.36576	0.451115
Cc02_g19810	GSCOC_T00014556001	Probable beta-D-xylosidase 5	-0.556365	0.256673
Cc05_g10130	GSCOC_T00021497001	Probable sugar phosphate phosphate translocator At3g14410	-0.522385	0.289371
Cc10_g03660	GSCOC_T00024899001	Transmembrane 147	-0.39891	0.411849
Cc01_g18780	GSCOC_T00016156001	Probable galacturonosyltransferase 6	-0.398446	0.40996
Cc08_g11190	GSCOC_T00027114001	Calcineurin B 1	-0.383949	0.407555
Cc02_g04100	GSCOC_T00020313001	21 kDa	-0.232474	0.557907
Cc03_g02460	GSCOC_T00025892001	Superoxide dismutas	-0.312648	0.475428
Cc06_g18360	GSCOC_T00040447001	UDP-N-acetylglucosamine--dolichyl-phosphate N-acetylglucosaminephosphotransferase	-0.290399	0.496294
Cc05_g06980	GSCOC_T00042217001	Probable polyol transporter 4	-0.346562	0.435655
Cc06_g16420	GSCOC_T00030695001	Transcription factor bHLH48	-0.427389	0.341105
Cc11_g13340	GSCOC_T00032192001	UDP-galactose UDP-glucose transporter 3	-0.398062	0.346536
Cc06_g19800	GSCOC_T00022860001	Calcium calmodulin-dependent serine threonine- kinase 1	-0.48509	0.259472
Cc03_g03550	GSCOC_T00026046001	Sugar transport 13	-0.322935	0.421583
Cc06_g13090	GSCOC_T00041448001	Peroxidase 16	-0.541908	0.201924
Cc05_g12150	GSCOC_T00021226001	E3 ubiquitin- ligase RMA3	-0.434483	0.307751
Cc06_g11670	GSCOC_T00041630001	Telomere repeat-binding factor 5	-0.397309	0.340011
Cc08_g02410	GSCOC_T00037713001	phosphatase 2C 29	-0.197319	0.539439
Cc06_g16860	GSCOC_T00004140001	Probable galactinol--sucrose galactosyltransferase 2	-0.628245	0.0963559
Cc11_g16170	GSCOC_T00038150001	Actin-related 3	-0.435395	0.282454
Cc04_g06160	GSCOC_T00022398001	D-tagatose-	-0.516842	0.194605
Cc04_g00770	GSCOC_T00021701001	1-phosphatidylinositol 3-phosphate 5-kinase FAB1	-0.283219	0.422258
Cc00_g16360	GSCOC_T00012375001	Metal transporter Nramp5	-0.257501	0.434546
Cc04_g13020	GSCOC_T00011366001	Nucleobase-ascorbate transporter 6	-0.198594	0.492196
Cc02_g07280	GSCOC_T00029963001	Serine threonine- phosphatase PP1 isozyme 4	-0.323032	0.35255
Cc06_g07470	GSCOC_T00031256001	E3 ubiquitin- ligase RNF13	-0.475192	0.177003
Cc06_g08360	GSCOC_T00031141001	CBL-interacting kinase 24	-0.388585	0.25803
Cc01_g12050	GSCOC_T00028126001	Histone H4	-0.278848	0.362421
Cc11_g11770	GSCOC_T00032403001	Probable UDP-arabinopyranose mutase 2	-0.12591	0.508154
Cc06_g17760	GSCOC_T00040364001	Transcription initiation factor IIB-2	-0.286056	0.347704
Cc01_g14570	GSCOC_T00028463001	Probable phytol kinase chloroplastic	-0.314093	0.319123
Cc02_g34920	GSCOC_T00011801001	Calreticulin	-0.425659	0.2063
Cc04_g05640	GSCOC_T00022325001	Staphylococcal nuclease domain-containing 1	-0.417153	0.21342
Cc01_g19130	GSCOC_T00016099001	Sulfate transporter	-0.421982	0.201252
Cc07_g11830	GSCOC_T00036950001	High mobility group B 3	-0.55429	0.0686278
Cc05_g09910	GSCOC_T00021524001	phagocytic receptor 1a	-0.155391	0.447495
Cc07_g11740	GSCOC_T00036965001	Phosphatidylinositide phosphatase SAC1	-0.323393	0.269844
Cc11_g08900	GSCOC_T00032813001	Xylosyltransferase 1	-0.320283	0.263998
Cc02_g11720	GSCOC_T00029378001	homolog subfamily C member 25 homolog	-0.272133	0.310591
Cc02_g35620	GSCOC_T00042821001	ATP-citrate synthase alpha chain 2	-0.171178	0.41128
Cc02_g35060	GSCOC_T00011820001	EFR3 homolog	-0.280394	0.296058
Cc09_g10240	GSCOC_T00041071001	Probable phosphatase 2C 60	-0.225527	0.345474
Cc04_g01710	GSCOC_T00021829001	Probable phospholipid-transporting ATPase 4	-0.266243	0.289392
Cc09_g08230	GSCOC_T00020763001	phosphatase 1 regulatory subunit pprA	-0.1959	0.359276
Cc01_g07830	GSCOC_T00015458001	FAF- chloroplastic	-0.263862	0.288772
Cc05_g00680	GSCOC_T00017114001	transport Sec61 subunit gamma-2	-0.313463	0.233282
Cc02_g16510	GSCOC_T00014144001	Translocon-associated subunit alpha	-0.237735	0.307189
Cc10_g01960	GSCOC_T00024689001	RCC2	-0.244782	0.299046
Cc05_g12910	GSCOC_T00021127001	Minor allergen Alt a 7	-0.336327	0.197468
Cc09_g01540	GSCOC_T00017795001	Glucan endo-	-0.283508	0.249372
Cc08_g05630	GSCOC_T00024347001	Conserved oligomeric Golgi complex subunit 6	-0.248718	0.275463
Cc04_g12980	GSCOC_T00011361001	Rac-like GTP-binding 3	-0.325783	0.196134
Cc06_g17930	GSCOC_T00040385001	Calcium-transporting ATPase plasma membrane-type	-0.139512	0.374827
Cc11_g17010	GSCOC_T00038255001	F-box only 6	-0.351615	0.156812
Cc02_g17650	GSCOC_T00014285001	Coatomer subunit gamma-2	-0.180072	0.327359
Cc07_g07650	GSCOC_T00040119001	Leucine-rich repeat receptor-like serine threonine- kinase BAM1	-0.164439	0.340622
Cc07_g06950	GSCOC_T00040025001	Casein kinase II subunit alpha- chloroplastic	-0.299499	0.195738
Cc02_g01090	GSCOC_T00019917001	Metal-nicotianamine transporter YSL3	-0.205263	0.267615
Cc04_g09970	GSCOC_T00042531001	4-coumarate-- ligase-like 9	-0.182634	0.287435
Cc11_g01800	GSCOC_T00019512001	GTP-binding nuclear Ran-3	-0.164793	0.298319
Cc00_g16070	GSCOC_T00003073001	UDP-arabinopyranose mutase 3	-0.218082	0.238754
Cc04_g09460	GSCOC_T00022835001	Serine palmitoyltransferase 2	-0.204014	0.239868
Cc01_g21390	GSCOC_T00004985001	Vacuolar sorting-associated 51 homolog	-0.257167	0.159321
Cc07_g00420	GSCOC_T00019113001	Glucose-6-phosphate 1- cytoplasmic isoform	-0.178406	0.150897
Cc07_g12860	GSCOC_T00036823001	Isocitrate dehydrogenas	-0.116808	0.193
Cc04_g15780	GSCOC_T00042357001	Plasma membrane ATPase 1	-0.13659	0.17275
Cc09_g07690	GSCOC_T00036216001	ERI1 exoribonuclease 2	-0.165209	0.140783
