# Supplementary material for: Transcriptomic Leaf Profiling Reveals Differential Responses of the Two Most Traded Coffee Species to Elevated [CO2]
Source: Int J Mol Sci. 2020 Dec 3;21(23):9211. doi: 10.3390/ijms21239211 (PMC7730880; doi:10.3390/ijms21239211)
Supplement: Supplementary file 1 [file ijms-21-09211-s001.zip › Table S8.xlsx]

## Sheet: Icatu_700vs380
Gene Uniprot ID	log2FC
FTSH6	5.19549263588544
HERC1	5.18791866232193
COL2	4.63702617037354
LHY	4.4211332893461
At1g48100	4.24061271079312
NRT2.5	4.16323935427697
COL4	4.1194164032983
nadB	3.98567519840297
CIPK5	3.92307647752508
CDF2	3.86884463008093
Tmem189	3.86114442059343
CYCD7-1	3.76481748572832
DOT3	3.7250315749808
hdhd3	3.68877677361042
RVE3	3.67395361319911
NEC3	3.62898108141482
At1g12663	3.6130621906696
SERINC3	3.30677871493122
STP7	3.29679892485066
NIA	3.29670664835604
CRK35	3.26271086100391
FLS	3.25768036674696
CYP75A2	3.23994148787166
GES	3.17792019760234
OPR1	3.17778914552153
BHLH92	3.1714219193892
PECS-2.1	3.17136897915075
PP2B10	3.12142025896867
BOR2	3.09893765212601
SPA4	3.09410852043641
NPF6.4	3.08292687517148
RPS7	3.06669479990097
ABCG10	3.06192302164109
CG7694	3.0521925765688
AFP3	3.04412728871177
SEC14	3.01989065885932
CYP750A1	2.98596820626899
SPA3	2.98405040531808
At1g12200	2.95311895084004
XTH22	2.90451160507546
GA20OX2	2.89105910473897
CYP71A2	2.88384471513865
pgap3	2.80165862387423
LTI65	2.78551779933965
PIP2-2	2.7459096789374
PR-1	2.74179864037334
BHLH18	2.71188353449885
MLP31	2.71162501798016
PIR7A	2.70619848364557
At3g16560	2.65929399710301
PPD	2.65512379576225
IAMT1	2.64170749339751
CYC02	2.62643974448307
At3g61260	2.62475590887607
nep1	2.60954909917029
GAPN	2.59618434701973
NPF7.3	2.5759467559107
HIPP26	2.55640166857109
AtMg00910	2.55356036623144
At4g04980	2.54152708193694
PME68	2.53546304362265
PGR5	2.53545213509983
FRO7	2.52524809629186
GRXC6	2.52498816234531
CAO	2.51608814424362
UGT85A3	2.50504106142197
AS	2.4952746872
NPF6.2	2.48126467298842
LAC14	2.47726789180644
PLT5	2.46690069233911
BHLH36	2.46367178468297
WRKY72	2.46308044003697
CCA1	2.46096401404305
mhkB	2.4152222283476
SPX1	2.38460046506881
NPF4.3	2.38000076351994
ABCG39	2.37192715060696
EMS1	2.3587876210297
WRKY28	2.33540235256298
At1g17710	2.33222162603222
PDH2	2.32881158114994
SDH3	2.31836246357267
PME53	2.31551074007174
GWD3	2.27349053396142
UGT74F1	2.26420987815251
PER25	2.24612448572545
HSP17.4B	2.2408071984589
BGLU24	2.2362876086918
TPPA	2.2317455038895
MYB12	2.22935843263873
CEL3	2.22344240875789
At1g68190	2.22129896196904
CYP74A2	2.21296408882989
SPCC663.09c	2.19005231756336
CYP82G1	2.18633675878583
PUB8	2.1828416248336
AZG2	2.1647886518656
GSTF12	2.15330780640536
ZOG1	2.14534655446757
ACT	2.14484831448095
PUB23	2.1285855913731
DFRA	2.11999753219748
INV*DC4	2.11185696253937
HY5	2.092154801822
At2g17570	2.09011985321807
PIP1-2	2.08967777633358
At4g02290	2.08808063712443
OMT2	2.08584439175176
AAE3	2.05518211983435
cbbY	2.04737081380609
GA20OX1	2.04232524463265
CYP78A3	2.04153474367741
D7OMT	2.04146983949403
PUB14	2.03573851441699
PIP2-1	2.0297692189196
ENODL1	2.02932289743303
UNE10	2.02732495719592
PUB19	2.02527862771817
BAM1	2.01748873770454
ALDH2C4	1.96272955314385
UVR3	1.95655656274209
SPS1	1.95131875114463
ATC401	1.94792397152475
HSP23	1.94334384046751
PMI2	1.94256449554252
ABCC10	1.94022029528313
IGHMBP2	1.93781638630727
ABHD6	1.93240452462433
GPAT8	1.92767394096423
UBQ3	1.92637511496615
CYP707A2	1.92468658358235
VIT_19s0014g04930	1.92189363785831
nt5c3	1.92137944433805
16OMT	1.91355950964604
PHT2-1	1.91348134081173
Cdlc2	1.89561156323575
At5g18500	1.89302457247057
YBR287W	1.88969065456823
san	1.88635276333472
ERF4	1.88613172047807
TPA1	1.87277520048237
WAKL14	1.86820350448997
EGC1	1.86689678798794
UPS1	1.8631006229787
slr1419	1.85982115090323
UGT76E1	1.85795137825562
HSP70	1.84142227011032
DIR1	1.84118770633568
PARA	1.8325961722702
LIS	1.83209798448508
CPR	1.82515136245324
TIP3-2	1.82425620731861
At3g47570	1.82292793680239
PPME1	1.81782434401933
RPT2	1.80899938501725
dnaJ	1.80796983943287
DTX45	1.80569228903672
DGD1	1.8051054691432
PUB4	1.80391016039079
LECRKS4	1.80350359291409
ubq-1	1.7983038819342
At1g49405	1.79616271698285
Os07g0688000	1.79467196800013
TSPO	1.79407226696455
SCL15	1.79011086631379
PHT1-4	1.78397057639627
fex2	1.78311996953911
SS18	1.77759923131611
BCB	1.7749263746199
hsd11b1l	1.77383852641584
At3g47420	1.76004529411738
GT7	1.75863235078538
RPL1	1.74775025468105
IRX12	1.74418130106508
CHUP1	1.74200332436289
Dcaf8	1.7412138360213
mkkA	1.73871533724929
HSP22	1.73279876032898
RTC2	1.72976563968909
At1g51745	1.72901606581486
UGT79B9	1.72154531328389
ucpC	1.71630698835001
CIPK14	1.71328318784776
RD22	1.70364846952334
CLC-E	1.69517960668552
CEBPZ	1.69242063929738
GRP	1.68543348844518
UGT74F2	1.68130523437495
ATPB	1.67646585792562
CAT1	1.67233786285173
SBP65	1.67021151457919
DDB_G0270104	1.66863536244686
EXLB1	1.66845754434397
PDV2	1.66811770683261
WAXY	1.66139320281395
PHT4	1.65883832409379
CIPK7	1.65632706067104
FAF3	1.6511738089815
GGPS	1.64746653547206
FAD3	1.63689674131718
ERF114	1.63014449957284
IP5P11	1.61703891256331
CXE2	1.61367474775412
CRK10	1.60627798097807
NPF1.2	1.60591367791397
GAST1	1.60376307604576
cisd2-a	1.6033195945576
GH3.1	1.60230597504183
SWEET3	1.58964755928451
GT6	1.58939168435906
aroE	1.58744556262023
MHX	1.586547158138
GID1B	1.58584284870407
CML4	1.578202464774
RIBA1	1.5746117324441
HSP18.1	1.57434296634972
UGT85A5	1.57390588199303
YLR126C	1.56815785988785
CYP71D12	1.56559427970624
HAT9	1.56406838083019
FBL4	1.55776385026965
MIK2	1.55415215144195
Dnajb13	1.55289523476379
SKOR	1.55240219197002
UGT73C4	1.54962259706715
PPH1	1.54153400383828
ABA2	1.54136675216711
RTNLB1	1.54004905086219
At2g30020	1.53006760677964
PARC	1.52532126087402
JUB1	1.51597680669164
Lonrf3	1.51182805738168
MYB4	1.51047133546917
bioF	1.5097657335465
ctpA	1.50904533756731
LBD39	1.50346789973019
CIPK2	1.50278756041292
REM16	1.49784283314772
MSL2	1.4918710409273
DOF5.3	1.48783760773369
MPK12	1.481076891083
GATA22	1.47496280851162
PAP11	1.47293658600237
CKX9	1.47061125100462
SPBP4H10.07	1.46911014415805
PLT2	1.46838581823562
MIMI_R707	1.46828898866254
ACA2	1.46408516707297
C12RT1	1.46395690540333
DOF1.4	1.45357146683407
At5g67130	1.44413981503185
RBK1	1.44391194414288
KIF4A	1.4366860598133
NIFU2	1.43664376552123
HSFA6b	1.43283261107531
CYP72A1	1.43001526398043
AGT1	1.42994339414035
ire-1	1.42919781264353
SODCP	1.42623985912345
PSY1	1.4254230273497
At5g59530	1.41920699512786
HO1	1.41763140222802
At1g32220	1.41595865012637
SLC25A29	1.41573330251198
Franean1_4929	1.4148962079677
At5g53970	1.41423989757436
MFT	1.4138224397159
AUR1	1.41170654136759
HSP21	1.3993159879205
CIPK1	1.3975485156284
TRX2	1.39287302175144
AAH	1.38688872959337
At5g39030	1.38617328297251
GSO2	1.38431677926788
MBF1C	1.3808871573478
At2g32560	1.38030824221544
SKP2A	1.37619818578709
FAO4A	1.36977958828076
STR17	1.36950126679814
MRS2-2	1.3683348204701
CRK25	1.36269456564671
ACO3	1.35597420792046
At2g02240	1.3493285457945
LRK10L-1.2	1.34622573387117
ABF3	1.34544912817828
VTC2	1.34368335656064
TDT	1.34329650247901
PLDZETA1	1.34013724875507
At1g28590	1.3393449607278
At2g30100	1.33126759110319
At5g03250	1.32895420103964
DTX41	1.3288297081791
At1g75040	1.32722481701931
RFL1	1.32467654798502
PAP2	1.32202882676163
mpi	1.31993070226914
GT-3B	1.31818031087354
EPHX2	1.31745654292864
PP2A13	1.31728726948436
HMGB15	1.31418788231019
SBS	1.31330790716688
BBE1	1.31095942621163
SBT1.2	1.30734128769298
ZAT10	1.30593539995575
At4g22990	1.30490186340617
At2g36330	1.3045633452585
At3g50280	1.30367891898518
FH	1.29986335516628
ATML1	1.29571895547582
ACO4	1.29204281843227
ATL52	1.29191598525036
SULTR3	1.2904585836177
NLP8	1.29037861758101
MLP423	1.29037601941222
HNL	1.28790376761794
AGT3	1.28362326831542
PXMP2	1.28288223924758
UBICEP52-7	1.28147797170825
HMGCL	1.27723753654147
CYP73A4	1.27699775160433
At5g48380	1.27158608710414
BURP3	1.27126176749124
SPAC24B11.05	1.26640099528772
CDC2C	1.26620111863522
ACO1	1.26517713550917
SAMDC	1.26458722194669
ValCS	1.26436954021813
CYP81E1	1.26369445746191
At5g14450	1.26351825063668
GLYR1	1.26189265011612
gyaR	1.26061467502462
lon2	1.26035441486526
ABCF5	1.26021153980404
NAA20	1.25764353046439
GSTU17	1.25705435141186
SPX3	1.25606844771674
RABF1	1.2527789331187
RLK1	1.24774047744565
TGA21	1.24664466482289
GPT2	1.24567875786644
NIR1	1.24506984478261
SD25	1.24361773909869
ARR4	1.24238974129322
CYP716B2	1.23927983609312
At1g06650	1.23834092471517
VIT_09s0002g03780	1.23796422211229
MAP65-3	1.23421900056213
MGD2	1.22844290328961
3MAT	1.22628199824365
NSP2	1.22531053745603
HAK17	1.22440037840084
BGLU40	1.22274550020387
WEB1	1.22136523980991
WRKY20	1.22043374785425
SEN102	1.21660944269559
At2g16250	1.21443006480904
At1g15400	1.21315864792682
SN1	1.21025120915551
PUB25	1.20786837903335
At2g38640	1.20735076611117
ATL43	1.19898509594816
IFRD1	1.19283452582621
SOC1	1.19219932739197
FH6	1.19219209546858
sec14	1.18930949112307
PP2A1	1.1846307137659
MLP43	1.18286511713806
acyP	1.18166799767823
MDAR4	1.18083198105849
At5g20260	1.17879094928505
APS2	1.17847317938638
At4g14096	1.17563300054197
At2g19810	1.17545310560415
ANKRD52	1.17439542442269
Fig4	1.17415009496151
DET1	1.17361569632942
AAE20	1.16961967557739
Ankrd13b	1.16938482946344
HSP83A	1.16523228760353
KRP3	1.16343882472995
plekha8	1.15961301168244
SE2	1.15957666911385
NUDT8	1.15772728762173
CSLA9	1.15576829982062
PDX1	1.15450301882823
SPL8	1.1485042372936
PBL5	1.14716042009157
YKL091C	1.1433537139718
kif4	1.14056064568854
HMT-2	1.13610540504526
cysG	1.13290322216584
PIR7B	1.13205383103885
At1g06620	1.13065160693297
PAP	1.12840172325084
SCRM2	1.12796052243619
COP1	1.1227484091214
RPS1	1.12255058383097
GLR3.6	1.12073843770819
SWEET3B	1.12063204624294
IKU2	1.11688739369617
RPL10B	1.11348017782249
HI_0488	1.11094688875369
BQ2027_MB2734	1.1069087777531
PGMP	1.10469770950512
BBX24	1.10316272208465
CYP89A2	1.100805619744
CDF3	1.10071202831603
At1g05150	1.09950528888445
WNK4	1.09857167435587
Os01g0794400	1.09680659962077
ERL1	1.0945298883307
R1B-14	1.0930952475981
ADK	1.09285860473061
ARF19	1.0870578690228
pspA	1.085024718603
OTU4	1.08220680014415
At5g13770	1.080990559204
ABCG32	1.07784464876992
AC97	1.07062276306713
Mcu	1.07055990432434
IAA7	1.06895359102262
ANT	1.06799373576223
slr0537	1.06597666147155
ado-1	1.06266013651071
DTX19	1.06183989155819
BHLH122	1.06183816076017
At1g30350	1.06056018244448
PSK6	1.05777216911403
RCH2	1.05588389891958
PUB28	1.05062771622302
ASR2	1.04886322688896
SAP12	1.04788927463924
CAF17	1.04781366322933
GDCSP	1.04563406073347
HMA5	1.04504969087445
SFR2	1.04482054859965
TRP3	1.04458053332141
PIP5K2	1.04022295848151
RGA1	1.03852091654895
GGAT1	1.03750610985778
PHR	1.03626304621451
FTRC	1.03616853072337
GLK1	1.03482651803463
PCMP-H11	1.03154753172182
At1g65010	1.02926048345381
Map3k1	1.02676097594425
RCA1	1.02377753191893
Os03g0144800	1.0234344651747
DRC3	1.02018502513287
KCS4	1.02002670583966
At2g16365	1.01914239193417
GSTU15	1.01853099563632
GSVIVT00026920001	1.01827448654995
SOX	1.01270763003206
LCAT1	1.01259638609981
At5g59540	1.01215444535467
DAAT	1.01076517192985
CSLG1	1.00935751167641
At2g29380	1.0093110991012
UGT74B1	1.00883871029653
DI19-3	1.00806371593082
CYCB2-3	1.00735675765383
BGLU18	1.00541859636531
At3g28850	1.00490324678009
RD21A	1.0030694940476
HSFB2C	1.00271218880101
CYP83B1	1.00199679995541
SGS3	1.00174667483832
WRKY50	1.00014601761818
ABCC9	1.00010087899229
NPR3	0.999673192182056
At3g16150	0.999316002807949
ERG1	0.999081438305449
At3g63330	0.998529856579553
RGA3	0.997790185853013
CP12-3	0.995822493556173
spg1	0.995614322067591
aspC	0.995600853307625
At5g50100	0.993806250101606
ZFN1	0.992122525705099
EFR	0.992089707849952
IAA16	0.986701912820485
CCR4	0.985792303647437
At1g17220	0.985265518830717
GN1	0.983468677026598
RTNLB17	0.98292938718091
RPS2	0.982265688856127
SPBC1703.11	0.981452363930457
GRXC9	0.974569766061642
APL	0.974151646157735
CIPK11	0.972010021763796
ltaA	0.971937931867979
SPAC6F12.06	0.971901559920339
POT2	0.971505172552904
TGA7	0.970329385847009
CLPB1	0.970185087337836
SAT2	0.967963430988593
allB	0.967108402833545
DSP1	0.966914186484856
CSLG3	0.965406312581697
Mgat3	0.963951185710396
RT	0.96287099165564
GMPM1	0.962790677314545
FLA1	0.960050530153112
PI206	0.959925927856377
ERD2A	0.959255915120516
PME2.1	0.958612870998914
NFYA7	0.958037930409423
desi1	0.956595066182719
MODA	0.956577765784342
gluP	0.956137550397481
PP2C06	0.954779859126237
GA2OX3	0.950719695357758
SAP5	0.95058542344181
EWSR1	0.949957059228108
GMGT1	0.948893470601165
KEA3	0.947684370755425
CYP98A3	0.946483657130063
OsI_021818	0.946285352819751
At5g37990	0.945407387481895
EMB1444	0.944180170820647
CYP84A1	0.94316277743739
ATL33	0.942620868527106
At3g27390	0.940468449597321
CYP82C2	0.940235653503847
ATM	0.939330747109007
ABCG22	0.938294789657265
At5g02240	0.937988638290284
SWEET2	0.935618592862673
BAG6	0.935060753978196
KIN5C	0.934245477419529
At2g39490	0.933644604575875
SPAC25G10.01	0.93174591766338
TIC20-V	0.931689502721967
SAT5	0.930264150214365
rhbdf1	0.927423032974542
LECRK42	0.926217911983832
HMGB6	0.92337760889185
PDR2	0.922936027475313
At3g14460	0.921976253614751
CSLG2	0.92054890369095
fusA1	0.919869494709716
GT4	0.919827712858874
TRABD	0.918860277442154
CIPK10	0.916600002309973
KAN2	0.916445683475598
clpS	0.916400329510177
aroB	0.916023869925694
NPF8.4	0.9146855163089
METK5	0.91410002906398
PDX2	0.91207561937316
gpmA	0.911787751442534
AMI1	0.911248501789873
PEX11-4	0.910272319295708
Tmem97	0.910156866260109
GP1	0.909185030789231
TUBB8	0.906235125507999
ADCK1	0.904434553508888
CIPK6	0.903884136186393
N4BP2	0.901646765834766
SDH2-2	0.898623507376095
PBL11	0.896897174246551
CHI	0.896884532708825
NPF4.6	0.896430087100109
VAS	0.896006870147188
ATL54	0.89503898069867
DOF2.1	0.893071950062061
NIFU3	0.892555079909469
NUDT18	0.890641733748001
SBE1	0.88907479732311
Tnks	0.888389043445952
FATB1	0.886440061906828
At5g45960	0.885244172237968
DDB2	0.884957119802581
At5g43190	0.884914942968086
SUMO2	0.883897894262199
At1g28580	0.883647444189982
SPS4	0.882868775005597
YUC10	0.882378307487603
At3g61320	0.879456785232866
TCP5	0.87937376671719
PGRL1B	0.87433797922863
Kif15	0.873046732800731
Engase	0.872451954128617
HB2	0.870797980681423
ZAT4	0.869663439065475
At3g51120	0.868909188827624
HSFA2	0.866207620563724
purU	0.865344440216431
AOR	0.864759305376319
HSP70-8	0.861612704856718
CPRD49	0.861485472504466
MSSP2	0.861153551552531
CIPK21	0.860870405562139
R1B-16	0.860440950778424
At4g14100	0.860263868454997
NFYA1	0.859725241511585
At1g29970	0.858320247459973
SCP2	0.857846832160603
SUFE1	0.856585978158785
PYR1	0.855201184404133
WRKY75	0.854504014029625
UBQ4	0.851700809784403
BZIP9	0.8510113307853
At1g22220	0.85027535869729
CTR1	0.849779595560211
clpB	0.848570291342555
At2g41710	0.848358845408951
Srsf10	0.845549830952948
APRR2	0.844890491711364
TCP4	0.843995399641451
At1g51550	0.840028012903349
AN3	0.839867595530129
TOP2	0.837332401160899
PP2CA	0.836524194529999
HEX6	0.834135468585483
TOR1L1	0.834064670912681
Tlcd4	0.83213773197328
TTC7A	0.831964160682136
PTPMT1	0.830941813519612
NSP5	0.830687259085834
CYP71D10	0.83040847110464
cdc20	0.829048013936426
CPK10	0.826151608980377
cotA	0.825482205395761
Ess2	0.824882495588078
CYP710A1	0.824150520776762
CML41	0.822318911517884
CYP734A1	0.820971740015241
At1g35710	0.82050353339395
ERD10	0.820450690602021
RFS	0.818463268368366
MLO1	0.81774390492107
NAC018	0.813770479545039
At5g11010	0.812959705332468
AUX22A	0.812344155248955
PARK7	0.810460201686556
RHF1A	0.810429137457842
MKP1	0.806531790801032
PAP17	0.805599710457828
ABCB13	0.805121571434115
OsI_033149	0.804213868026738
PERK2	0.803506250310394
FH13	0.802641056121299
ROPGEF2	0.802049532322584
At2g29640	0.801219802494478
At1g01500	0.800853059007025
SSL11	0.799540585064645
ABCB28	0.799032846963906
ZAT5	0.798801058704789
HMA4	0.79847103056294
MLO4	0.797883480072431
AGO3	0.797785515577892
CYP82A3	0.797445831676713
slr0575	0.796157944261697
plcB	0.795046760627256
CAD	0.794805209567247
PPA1	0.79448946461818
PCMP-E38	0.793696315331761
WSD1	0.793122945423172
At5g61250	0.792483575847701
PPCC	0.791947498576397
sll0005	0.79132009900957
GAPB	0.791098391791093
AHP4	0.790967473559966
Ccs	0.790832498298767
At4g35180	0.788776230593949
BIP5	0.788495376204608
CIGR1	0.788343197941605
PATL4	0.787338860562675
DNAJ1	0.786492227207212
PMSR	0.785760796383163
LOX3	0.784642250435711
MPK19	0.784297242840953
TTC1	0.783902497306725
Dnajc2	0.782608238094502
DDB_G0272012	0.782124673373604
At5g64080	0.781418737113318
ICMEL2	0.780788020291973
KCS11	0.780089580606415
BGAL1	0.779940062565148
ABCI17	0.779349587942803
PRMT3	0.778447265490624
At5g03905	0.777525209251353
SPCC757.02c	0.777081248972048
slc25a26	0.775508594929749
NUDC	0.774771710299713
CPR1	0.773864872166906
CIPK19	0.773533029720392
KELP	0.771780239975244
bchH	0.770313640514186
CDKB1-2	0.770257266769631
LACS9	0.769953132418139
GL2	0.769700925519282
At2g38610	0.769329322868099
RBOHA	0.768433673665402
CYP71A4	0.768429351738195
RABH1E	0.767565612370596
PIF1	0.764908201426657
At2g32990	0.761724430797827
SINAT2	0.759346498325172
STN8	0.756609896820039
SHN3	0.756093314092814
RPM1	0.75517534147699
MCTP2	0.754132755253785
PUB16	0.753353029996255
mgtA	0.753257355221731
HST	0.752997749695447
TPKC	0.752943490486788
AMY1.4	0.75237704146772
HAT22	0.752121482679654
PERK15	0.752089525680568
At5g13200	0.751389897490182
PRS2	0.751254622713445
SLC25A39	0.75051303537595
IMP3	0.74876607303204
alaS	0.747482544454177
SPX4	0.74672699296246
CDC2D	0.745819420222866
AGL31	0.745648695146138
DBR4	0.745053167289948
PBL3	0.743342690698568
mx2	0.743280076084362
NUP98	0.743206567794605
YAB5	0.742688475752224
EID1	0.742409755829029
PRA1F2	0.742141671299924
TMK1	0.7396748269761
FD	0.739332245213462
N	0.739126829077165
SVP	0.737688455947423
AFRR	0.736953075287451
ARF18	0.736752936117544
CHS1	0.735788841260348
SIP2-1	0.735580209022583
Ggt1	0.735308400460207
At1g60690	0.734588362574787
At5g03795	0.734385630762601
OEP16	0.734369601677559
NCED1	0.733888895891293
DDB_G0292028	0.733556406588896
RPP25L	0.733465755653976
HDA19	0.732119101331677
At5g17010	0.731678554852023
CYCD4-1	0.730864035383606
At1g51440	0.730031670969411
UBC28	0.729454510240316
PVA22	0.729372739292806
POT4	0.729240063281216
UBQ10	0.728414670934234
AMT1-1	0.727775540187441
ATL21A	0.72639541683488
RPP8L4	0.726284684987711
SKIP32	0.726040016544425
At3g49140	0.724200168677044
UGT91A1	0.723877662038868
At4g37250	0.723365153887695
SBH1	0.722283462704098
BAG3	0.720212763441475
ADH2	0.719435102054142
PDLP8	0.718925493412629
PME51	0.717949901629757
slc32a1	0.717713118907903
WOX1	0.716921984381222
SPX2	0.716320465290444
dusA	0.716163416712769
KIF15	0.714883210844805
CYP71D55	0.714218029046234
PBS1	0.713988611689198
RLP12	0.713301574554205
At5g39570	0.710783733258184
PFK2	0.710571588644205
HAT5	0.710034039667378
ptdss2	0.709182735917739
KCS1	0.708560850350337
SKIP35	0.706019822951316
DRB4	0.702211313701878
dmpD	0.700159394259003
GLIP1	0.699710657734438
OsI_15387	0.699345212143693
ANS	0.698648113477991
OPR2	0.69839227920731
KCS3	0.698368223849575
CYP86A2	0.697571374278357
HCF152	0.697212902171329
crtQ	0.696991411121989
STOP1	0.696178284857421
WRKY11	0.695850445428808
MKK5	0.695804244104126
Tlcd5	0.694053848648496
MYB39	0.69161355438484
Os04g0430800	0.690455615804193
RHA1A	0.689450984965509
SPL9	0.689437949508268
blt801	0.688446980226732
FIGNL1	0.687442422142052
Setmar	0.686617335039083
faeA	0.686264664156877
GPAT6	0.686141975003182
SPAC3H5.08c	0.685739645481453
RhGT1	0.684713791529557
PKS1	0.68405169432676
At4g28440	0.684045920954309
HIS2A	0.68343778086704
AGD5	0.683159124085716
VIT_05s0020g04070	0.682255551919033
MMK2	0.682229541451216
KEA5	0.679380536346457
CML10	0.678751157395459
cyt-1	0.67605614213298
DTX42	0.674241791144035
ZIP6	0.674144767663487
HSFB3	0.673835450181078
gchA	0.673537507796971
trpG	0.673366599440892
DME	0.672363816972608
AMBRA1	0.672129906754578
SULTR4	0.671621449397883
dur3-1	0.671036380528024
AHSA1	0.671003467833108
DNAJB12	0.670604774270746
sigA	0.66884213191753
TTL1	0.667900976213447
At5g23430	0.667747405893253
PPC6-7	0.666571526670712
GUN4	0.666518812466373
ST3GAL2	0.666235267098432
PRXL2C	0.666008309185067
AAE7	0.664035434577088
CML46	0.66378551521759
surE	0.663626754301559
SLC25A44	0.66232587944694
PRR95	0.66232473574209
RUB1	0.661557711061729
St3gal2	0.660484174762593
At3g14260	0.659264221727978
GLYI-11	0.65872104450224
ATL24	0.658457730768335
SPCC1494.01	0.658077106463496
SEND33	0.657578659491904
GAPA	0.657262803684456
yocS	0.656170606864351
TPC1A	0.655890116028216
YSL12	0.655486382925465
At1g75720	0.655438536046176
rpa1	0.654582501636198
CLC-B	0.653149397714299
RKF3	0.652792410307686
PLL5	0.652693051527483
Arhgap24	0.652080691118103
rcc2	0.650798933137484
AGAP003155	0.650789891549592
BHLH51	0.650455654526824
PDAT1	0.649946863768458
MTP5	0.649269339940679
At5g25630	0.648894642052399
Ttc7a	0.646962756125168
BHLH80	0.645609468095228
BPM3	0.644728115092566
PVA41	0.644576646358063
At1g61340	0.644271205999662
NRDE2	0.644242695601866
At3g15260	0.643871756350506
PHR2	0.643322783475955
At4g29360	0.64290844010875
At5g07670	0.642413905336054
PRPF18	0.642359744023313
NT5C2	0.642307838477007
glpQ	0.641992000350177
topbp1-A	0.639653626624292
GRXC2	0.639199634891046
PHO1-H1	0.639127723644085
HPTG1	0.638004266601598
PRS3	0.63770440636097
Os01g0760600	0.637578581158835
POT6	0.63678219746062
MARCHF6	0.63576828669891
At2g41900	0.635371869906231
At5g45910	0.635254762176353
ASK8	0.63422691376394
WEX	0.634019054075569
4CL1	0.633413278341333
ndhM	0.631973581235061
DOF5.6	0.630830068097951
At4g10955	0.630495371993881
vip1	0.628515245748903
MIK1	0.627834782134172
mcfB	0.627705759918619
ARL8A	0.627375530271124
PME34	0.627001862389507
UPL4	0.626654772840357
CHSE	0.626486325850125
CYP77A2	0.625518229774149
ASAT1	0.625042348040057
SKIV2L	0.623512743259331
arnA	0.622657569093557
lin54	0.622622910981598
SCPL25	0.621565346284832
CBSCBSPB4	0.621338124100748
TDIF	0.621252369120823
CAB13	0.620308873662432
CRYD	0.618811212386267
ACO2	0.618387470749609
Bp10	0.614159356250255
R1A-3	0.614123201012752
DDB_G0284253	0.612855342665365
CSLD5	0.612747811601204
DREB2C	0.611865442852774
At3g49055	0.61151151598501
BETA	0.611100671380778
At3g03300	0.610357520482919
HDA2	0.609008151570167
At3g50810	0.608975517899758
OXI1	0.608420729233538
GAL1	0.608099503837462
ERF011	0.607866209820261
GGR	0.607608449379128
SYP61	0.607349623130389
SR34	0.606694686047024
plcN	0.60524189900955
CESA6	0.604551957645939
GABA-TP3	0.604401018942407
CLC-C	0.60312104026572
AN	0.602178612951344
PSAP	0.601557998056427
GPA1	0.601021657051026
KIPK1	0.600057441617481
JAR1	0.598395353434574
HSP17.3-B	0.597769213596472
Morf4l1	0.597720369993194
ERF3	0.59749089689905
USP	0.596536158352922
SMO2-2	0.596193103121132
ibtk	0.595173081956992
PERK8	0.595038697675796
At3g11320	0.59387983582726
Dnajc28	0.593454708493067
HOP1	0.593065795725634
At3g61590	0.591632673967788
SPL7	0.590848970644749
CPK11	0.589820065905302
At5g41330	0.588971724216899
IQD31	0.588878776657645
COI1	0.588315533591694
At3g44326	0.588297904052945
NUDT17	0.58808056205182
sll1770	0.587631197738996
MCA0497	0.587575318625599
SERAC1	0.586925603671846
tlp	0.586018702718459
YAB2	0.585842999491197
FAD7	0.584959196886553
CM1	0.584672307540727
Stxbp5l	0.584527009537536
Xylt2	0.584006893098138
DRT102	0.583738755290521
GDE1	0.583465575409668
TIC32	0.583452077638011
ABCB26	0.583185319292442
TIC55	0.582288517809872
At4g29420	0.580823467528573
IPP	0.580638284882185
LECRKS7	0.580589316853365
At5g40670	0.580015272765787
CAD1	0.579377632719857
ADO	0.578893500455004
Meak7	0.578406117360875
UGT76E2	0.57805080684624
POLD3	0.578010284468893
PHOT1	0.577819200588861
UNE12	0.577742676609927
DSPTP1B	0.577579272886649
CYS5	0.577399085977872
HGO	0.577399053542347
DDHD1	0.577189556848072
At5g19025	0.575123568424488
WRKY18	0.574906067609533
At1g18900	0.573338491689174
CML3	0.573323715211682
SSO2163	0.572285804253369
COMT1	0.571942730429218
NDK4	0.571793722515436
At3g62260	0.570999153969457
SRF8	0.570478852792835
PDX13	0.569790664130511
XTH33	0.569385309918763
Tmem64	0.568925498692723
At2g40140	0.568228658706795
TUFA	0.568189362183589
ATL65	0.567849072139944
At2g34460	0.56774930929254
Plut_0637	0.567602248920025
Dctpp1	0.567265866180455
SCL14	0.565621851068176
RDR1	0.56541474227391
DDB_G0284019	0.564791131210084
MRS2-4	0.56430146330406
COL1	0.563817062340477
ABCF1	0.563815128709063
SLC38A3	0.563502844968198
PAL6	0.563500249458126
abkC	0.562323098086918
NDR1	0.562316551919932
lip	0.561557500018732
Gpr107	0.561526419184798
CYCP3-1	0.561448389565121
ADK1	0.561302757552361
SPS2	0.561198568404371
Exd1	0.560954103597815
AFB3	0.56094909810421
At5g35200	0.560465130712997
ABCC2	0.559740669525057
PUB33	0.558908552595647
AHA10	0.558901075659621
SKIP23	0.558670116683721
At5g41620	0.556883207966403
CBSDUF1	0.556872540302824
MED10	0.556355084574866
At1g71790	0.556304638948782
LECRKS2	0.5558702868835
pucI	0.554950544565351
DHRS12	0.554817469757397
UPL2	0.552983012582256
Os11g0244800	0.551747102512845
ABCB25	0.551264929043625
PP2B11	0.551107089579952
At1g22960	0.551025589495746
CYP707A4	0.550203905146884
FRS7	0.550012386690694
RAR1	0.549954073913075
GPI8	0.549668231714905
R1B-12	0.548415750604649
LECRK82	0.548413318022212
PUB40	0.547987085137146
SODCC2	0.546354607271633
At1g68400	0.546351624627509
NAC072	0.545753126477199
CAB8	0.545012745374978
CXE1	0.544504933309001
TGA1A	0.544409059072417
SAP6	0.543443385782646
KINB3	0.542466607657152
ADHIII	0.542101066944085
PRA1B4	0.542059612955762
FKBP12	0.541242101195266
CYCD3-1	0.540913606934222
DREB3	0.539703744683701
RBL14	0.539592442974212
NPF2.13	0.539215309533589
OEP24	0.539189686085705
THT4	0.537882067091186
chmp1	0.537465822748437
NPP2	0.536790151481536
RAP2-13	0.536767584069345
MAN2	0.536585415387115
AOMI	0.536404352209787
ARF	0.535522370123447
At5g49610	0.535010844136607
gacA	0.534510199759017
OPT7	0.534116840150227
CRTISO	0.533670922319639
CML44	0.532138896224687
AMPD	0.532006528180241
NPF5.7	0.530770508526715
APS1	0.530039641506992
CRD1	0.529809884928266
PPC4	0.528235363485983
kif6	0.527110099410148
RING1	0.527027923612721
RBG8	0.526680937467936
SAP9	0.526256640693026
Hgsnat	0.526184480846995
RABB1B	0.52575941342801
SDP1	0.525178984381473
At3g52680	0.524601642068928
ndhN	0.524153842172072
AP2	0.523794225574779
Slc25a3	0.523728324166869
At2g26730	0.523489448921821
ESYT1	0.523197411051154
ZFP6	0.523155157439117
At2g30550	0.522438648562221
SPAP11E10.01	0.522368646655541
Fggy	0.521340845054527
SUS2	0.521229894326274
BHLH14	0.521146827178739
At5g23350	0.521091803070739
neur	0.520570711625726
CBSCBSPB3	0.520484963825196
At5g60050	0.520242625313164
ATX5	0.519860587308547
FH8	0.518539144810583
EDR4	0.517113812895298
RDM1	0.516670704440371
At1g60420	0.515771674033883
RABB1C	0.515180378840884
NRAMP1	0.515130706807847
HSP21.7	0.515085872737642
AHA8	0.514439592524118
DHAR3	0.51362862210534
At3g08610	0.512959704247973
CSLA2	0.512778875797585
AAE5	0.512451727214358
bipA	0.512405876334979
GATA5	0.511845890368805
XRI1	0.510542971025892
TBCCD1	0.509406848119073
Trank1	0.509366041267943
rsbQ	0.50887317292106
CPIJ013394	0.508557318652424
URH2	0.508446150833453
FTSH2	0.508319439432969
pam16	0.508243469011551
SCPL50	0.508099750423416
ANTR6	0.507969470890333
MGLL	0.507618485725193
SCAI	0.507138500342879
PP16-2	0.506772008176517
PAL	0.506732257199371
FAD2-2	0.506108018839376
NIP1-1	0.505720464839188
RHN1	0.505529481047448
IREG3	0.505129340830352
CML21	0.504182318594771
PRCP	0.502724858240867
GLO3	0.502010549988201
HMG1	0.501808435803934
PPD4	0.501781616459567
DGAT1	0.50137136706169
TPS5	0.500898348934164
CYP94A1	0.500338116913782
CYP76C2	0.499968620025644
NPF6.3	0.499852493831107
slc38a7	0.49966794593774
UFD1	0.498570584819405
CML36	0.498194655402605
PH1704	0.498114351161459
ERF034	0.496700150419544
Notum	0.496584336576012
FKBP65	0.495537237933391
ITSN1	0.495532421043731
DEGP9	0.494073195149423
MUB4	0.493305833616747
At5g25090	0.493038178350447
MSI1	0.491994580120747
ARID1	0.491940911821018
nudt21	0.491463234007677
PP2C27	0.490862070037647
AAEL006251	0.49019799053339
At1g52590	0.489831928980542
PDCB1	0.48961460336865
zcrb1	0.489000061571828
PSAK	0.488837956270259
At5g16450	0.488394602382217
ANK3	0.488080766725052
QRT3	0.487612239585246
ATHX	0.487345707660634
GH3.5	0.486984726879434
PIP5K8	0.486461742195699
larp7	0.486320545830515
ROM3	0.485521942403181
EIN3	0.485192428555682
ANT17	0.4850364009815
SKIP14	0.484325901400768
CAMTA2	0.48337447028508
At5g47800	0.483044700264666
PSBS	0.481468596677766
At2g37660	0.480955709807627
NUDT25	0.480759597628424
NPF5.1	0.480639156804161
NUS1	0.480070500322059
abhd17b	0.47992633561204
SLC25A17	0.478883323742466
GATA26	0.478816263449101
VAMP714	0.47832469093031
FBL8	0.478106532444394
CST	0.477924195691297
shmt1	0.477805457616784
PFK3	0.4773530439197
PER43	0.475482401229642
LAR	0.475116451442916
PYL8	0.474463901959913
PUP3	0.473611769180174
Lancl2	0.473329323077075
RHF2A	0.473037067751218
STAR2	0.472341630029496
UBC3	0.471320881258951
At5g66720	0.470613575538516
LAC12	0.4703473738428
TRP5	0.470076171280731
thrB	0.468242338912777
spp27	0.467962802022156
CCOAOMT1	0.467921571752374
CYP74A	0.467459946995024
DR1	0.467263257671311
PGDH2	0.466962995477537
At2g30780	0.466848243253303
NOP12	0.466718383730835
PGM1	0.466435330125993
ptges2	0.466335128420424
CYB561C	0.465442339076447
Rpap3	0.464201491701857
MOS2	0.464159162759197
BPS1	0.463899270833397
MSI2	0.463561668333683
DDB_G0269284	0.463553053741135
MLO3	0.463542442191892
FAH	0.463126857989337
AMT1-3	0.462828185807375
SNRNP25	0.462825773855779
At2g42990	0.462160982766739
yugF	0.461885250986067
CRWN4	0.461204561558133
MSMEG_1481	0.460747582985941
myoJ	0.460688095244183
CAS	0.460320378382059
captC	0.460132393006398
At4g10260	0.45914149698561
CYCL1-1	0.458861365858432
RAD5A	0.458833421050878
OPS	0.458774790471411
MYB306	0.458395192384709
At3g09310	0.458160913706772
At1g55760	0.458146750713436
BHLH113	0.457933733490832
ATHB-7	0.457113201607413
BGLU11	0.457002113095613
HEC2	0.456519297435714
AUXI1	0.456426270608042
PLPBP	0.456273343597404
okr	0.455713565872421
XCC3184	0.455645445457379
PAP26	0.455588720437178
GPX4	0.455562511321584
PSB28	0.455431595204779
PLD1	0.455367518207914
OLE16	0.454166055117976
PGL1	0.45374346163778
UTR5B	0.453072019068891
ATG8I	0.453042512673323
ARF1	0.45303432996459
pdxH	0.451753738898414
YBL036C	0.451295332528281
mip120	0.450854030941102
ELP5	0.450737489901888
At3g59230	0.450622259717358
VDE1	0.450396468203345
PIMT1	0.449271279080773
DNAJC7	0.448988008955385
TCP20	0.448830016454265
MRS2-A	0.447497026419275
GCN5	0.446408618269276
At1g32060	0.445346207181354
At1g61180	0.445234089482433
CDKG-2	0.445003434662481
MGRN1	0.44461667578002
DI19-1	0.443774943680206
mhpC	0.443061431654531
TENA_E	0.44284095714974
yipf1	0.442822685944113
LPD1	0.442143452778196
Syncrip	0.441890119253034
AAE6	0.441662627334456
VIP1	0.441025559190738
TYRAAT1	0.440591181327742
CHIP	0.440305894406408
WRKY32	0.439860704095785
GATA24	0.43971509720371
DOF5.4	0.439220398564931
ycf45	0.438578949127732
SQD1	0.438365898281974
Mgll	0.438231520454195
URM1-2	0.437897791549696
IP5P6	0.437613918710058
P4HA1	0.437603576088924
relch	0.437432397188442
IMK3	0.437375192720634
PSKR	0.437015003325742
At3g26840	0.437000868085475
BHLH3	0.436957909905938
At1g07440	0.436618703635505
ALMT9	0.436392468126239
ATL2	0.435184492385782
CAMTA4	0.435110006822535
REV1	0.434844886182619
At1g80640	0.434268606871109
Rnf185	0.433902833096152
Os10g0370000	0.433889124520033
TIP1-1	0.433568873757829
ndufv1	0.433206721858484
Aaas	0.432692585229678
Tom1l2	0.43117885291138
IAA13	0.430629186481914
PEX3-2	0.430176589766917
CYN	0.429721544219182
PUB11	0.429629471411879
PVA21	0.428873987769131
PAP22	0.428853676237407
MUB3	0.428697622281013
MUB6	0.428230428836869
ATG8C	0.427907917664995
XBAT34	0.427206728444207
nsrp1	0.427053185921207
SRT2	0.426690939813569
Bag6	0.42556385583935
PSK3	0.425509219940366
At5g07610	0.424699153716177
At1g73020	0.424028870924492
LTPG1	0.423861447385233
Gbp4	0.423793456013136
ARP8	0.422747345232605
sll0355	0.422653384097101
PUB46	0.421603917267754
med7	0.420900875556403
ATG3	0.420495842460526
SHKB	0.420290108271125
Os01g0233000	0.420205630093876
At5g39250	0.420183074811857
At1g01350	0.420068110065131
Slc25a11	0.420021730139824
SNUPN	0.419711498054226
DNAJC14	0.419441186924201
OASB	0.419330288766661
Msed_1424	0.418131896136752
CSTF1	0.417472868823646
At1g07170	0.417011152814809
CLC2	0.416951536416853
UBP16	0.416277811342429
SPAPJ696.02	0.414110096682481
AGO4	0.413550510227364
CDKF-4	0.413392587368798
RTNLB12	0.412725795849755
FER	0.411153612667932
CAT2	0.411064539874903
At4g26160	0.410846449005471
At5g65560	0.41062426873798
XRN3	0.409587803910932
POT11	0.409168959980553
ISPH	0.408965677522899
Os10g0513300	0.408947965534212
MSI4	0.408379873186736
CALS6	0.407516671597659
EMB2731	0.40665596484193
RAD17	0.406228632661472
SDH1-1	0.405837684035151
RBK2	0.405462350771246
ALA8	0.404455611157083
TL20.3	0.404015948751025
NPF6.1	0.40388827590035
PP2A9	0.403650603278104
At1g32860	0.403602223449967
PIP5K1	0.402893392311564
SINAT3	0.402750725353597
LAG2	0.402666159268758
CNGC4	0.402484230847537
Dolpp1	0.402468004103488
ABCA12	0.402410595422969
At3g05500	0.40238615062426
DAR1	0.401872210001994
GATL7	0.401853926243474
URH1	0.401717806589204
FRI	0.401650673938546
At2g23200	0.401611454093484
RPRD1B	0.401056457932787
At4g08455	0.40068708184256
STT7	0.400572205163865
GDCST	0.39998281828261
GAD1	0.39974959214538
RF2b	0.399448981086372
CXIP4	0.399156505000414
SDR1	0.398277101182093
At5g10810	0.398133298849972
METAL1	0.398002975161809
SEC	0.397855636942615
WRKY70	0.397843439943474
SKIP15	0.397660187108071
Paxbp1	0.397318327547448
sf3a2	0.397065396735726
VSR1	0.396980716569387
At5g02830	0.396703284147503
Os08g0126700	0.396376874829349
tfg2	0.39620440921782
PPX2	0.395645080404908
UPL6	0.395523385214927
EBF1	0.39519457819421
AGD6	0.395117918249575
pym1	0.394868256393059
dcp2	0.394575613352395
PUB17	0.394573246779614
PUB35	0.394501336796007
ARC5	0.3944734332637
lst-2	0.393906491530053
KAT8	0.393803907042699
DDB_G0279405	0.393347412586826
DOF2.4	0.393074949396912
ETO1	0.392622409779361
RTN4IP1	0.392243554405368
LSM5	0.392096655982537
GTF2A1	0.391809493891648
EEF1AKNMT	0.391761434888301
At4g28400	0.390999887388023
At1g13570	0.390475462638635
At1g08370	0.390042209938926
ZFWD1	0.389906907719959
Eif2d	0.38913179981987
FT1	0.388444394112084
yjbI	0.388215556925554
CESA5	0.388214038330865
WRKY33	0.388185954738086
CIP8	0.388110277847984
At4g06599	0.38788031002174
XDH1	0.386956227388349
Os02g0672600	0.386898369687225
BHLH137	0.385977402818638
wdr45b	0.385731929655544
ATG2	0.385351923523118
At5g27450	0.385227502051212
CYT1	0.385208687423956
SKIP22	0.384856295799851
GATA25	0.384679386870935
rhmA	0.384583137902061
ubtd1	0.384384178031618
VAMP727	0.384220148085841
WRKY69	0.38394447750459
Gs1l	0.383510112605298
SART3	0.383156325782997
TLCD5	0.382957168991595
IAN10	0.382769297392209
IAA8	0.382494589638745
med25	0.382206117574049
cpcT3	0.381716139968843
ALA10	0.381074444922459
DPBF3	0.380851925510506
PAP1	0.38017340554874
At5g67140	0.380117852418097
PBL9	0.379460424346423
Pdk	0.379206301271604
UBA1	0.379042336460535
Dnajb12	0.378988389419509
IAA26	0.378924915886743
slr0074	0.378412910128659
WDR44	0.378322505865791
THI1-2	0.378158871751037
WRKY41	0.377866753572962
PLEKHH1	0.377822464512841
HSFA5	0.377750148347506
At1g22280	0.377627197590067
ERD2	0.377285829100459
BHLH13	0.377223564197673
Sec13	0.37705445650364
mrnC	0.376551820394624
CLV2	0.376538213650086
VPS24-1	0.376320638982753
Dynll2	0.37624650914035
SRSF12	0.376031483496081
RIE1	0.374879955878349
At2g34210	0.374407262986678
Ss18l1	0.374329597374925
RF298	0.374213276111932
R1B-23	0.373935754234618
CYB5	0.373846301375159
FTSH	0.373237497671641
FDH1	0.372816517712461
SKIP1	0.372166845295047
KAB1	0.372151826043988
UBR7	0.372114588259735
At5g28840	0.371983017376891
Api5	0.371635977957203
ADT3	0.371592525809588
PSAN	0.371223220598768
pitB	0.370779892060723
SUVH5	0.370692017166191
ugt52	0.370409945338631
sym-1	0.370337574760728
BRM	0.37028183556064
SPL6	0.370125769074926
Os01g0270100	0.369390368013266
NLP7	0.369316965354984
NLP6	0.36897997492554
DCUN1D2	0.368808639098219
Camkmt	0.368103229391812
stk11ip	0.36802030459848
GATA11	0.367981912253852
PSBT	0.367253052791075
LECRKS1	0.367186106568893
mx1	0.366682126924094
ITPK1	0.366285625773638
YPT3	0.365494603481296
CS1	0.364836655288546
INT1	0.364292814811198
B3GALT12	0.364165285699613
tolB	0.363918252609765
At1g08570	0.363278939587437
AL6	0.362990962759955
DNAJC8	0.362972591249897
RAC5	0.36275150730183
COMT	0.361841899946339
ACC1	0.361829707395526
CMDH	0.36161280020674
SPS3	0.361536979212185
ACA8	0.361505880623896
TDRD3	0.361416595476078
At1g19940	0.36105926137441
DDB_G0277951	0.360746376407453
PCK	0.360634108447151
SKIP34	0.360249797512599
PGP	0.360080191747216
spoT	0.35987512320315
ST3	0.359749826258777
BSL3	0.359740418914141
Chac2	0.359669122603603
At4g11680	0.359419825603831
MPC1	0.359228727843951
SAPK10	0.359163817408375
SYP22	0.359078219853478
FZR3	0.358709560228623
PR	0.358673062700351
At3g03770	0.358667166052224
At5g47720	0.358266616110693
At2g43240	0.35803553016404
NERD	0.358015945313315
Ctsb	0.357860063725834
UCHL3	0.357754485755188
CASD1	0.357159304458811
GDPDL3	0.357091013265975
Sde2	0.356694733819116
SKP1A	0.356482839921839
At1g08160	0.35583572955165
DCUN1D1	0.355709527236502
MYB	0.3556713130695
MTP10	0.355286451982836
KEG	0.355046874761644
MAN2B1	0.354857727149752
TIAL1	0.354462434946687
CHAC2	0.354329578733581
At3g19330	0.353920826438642
CAJ1	0.353873915207373
RLIM	0.353707990214217
TIFY4B	0.353676454217151
GOS11	0.353627076529368
OEP164	0.353471608964646
LDL1	0.35328006235886
AL5	0.353220777722828
4CL2	0.35304811288221
At3g47120	0.352520976626662
AGPS1	0.352476149046228
Prep	0.35176547204638
VPS4B	0.351393819186786
ELC	0.351185746826873
Ppie	0.350268408311199
Ncor1	0.350252105736531
gpc1	0.349302024967469
At2g04570	0.348996329421677
METE	0.348544036512681
GAE3	0.348518143305768
lvr	0.348445310371864
FCA	0.347641074905709
COPT5	0.347523921939987
bcsl1b	0.347500594244469
At3g22480	0.347382234650137
ASK3	0.347134800237139
VDAC2	0.346339362437367
ADF2	0.345794323321551
F8H	0.345761777436076
At1g21570	0.34574969582537
B120	0.345565530192717
MCU	0.345500369157241
YIA6	0.34494450204838
TPK3	0.344698176986292
CBSDUF6	0.343915038131727
B3GALT2	0.343713892245437
Lpcat2	0.343622000705467
WRKY15	0.34327705990499
Rbpms2	0.342863558260862
NAC002	0.342741343013104
IDH1	0.342495181514488
PLA2-II	0.342377580480336
UVH3	0.342020646343705
BP-73	0.342015203841498
DOF5.1	0.341905749333695
FBA2	0.34166265881951
TFT4	0.341172601960247
ara-1	0.340543103693677
CAX2	0.340184313155675
R3HDM1	0.340140185990088
At4g06598	0.338999309532309
wdr82-b	0.338789523126669
CEY00_Acc23110	0.338614367144611
FTA	0.338342042849478
SYP132	0.337646988474721
Os01g0834700	0.337358082873503
GPD2	0.337274551186454
At2g19130	0.337274314647853
VTE1	0.33683175540302
CCX3	0.336651790424606
allE	0.336249026592591
yacP	0.336234049279888
RHM3	0.335825608084381
Taf10	0.335397109273582
At5g63260	0.335214596898339
vps13A	0.334940784117084
At5g52880	0.334854448007628
Os08g0127700	0.334852691764881
KCS5	0.334203321896322
Sympk	0.333780608573104
ALG9	0.333372547509515
TPS1	0.332995412202558
SNL4	0.332787882748758
Nup62	0.332121975695
At2g45070	0.331992390170133
IAN8	0.331794956826994
MFSD12	0.331759775732317
At3g48880	0.331559366711501
PRR37	0.331026733037927
NEDP1	0.330815933063681
At4g01020	0.330410590545531
At5g39865	0.329772174590374
DCL4	0.329761368937364
lvsA	0.329334554155748
At1g17350	0.329005432090683
SQE1	0.328027204883951
TAF8	0.327984331736865
ahsa	0.327942329501966
KOR	0.327840625894633
let-413	0.327501233862817
DEGP1	0.326567293167632
SKIP28	0.326405562430933
KIWI	0.326386488550841
At2g33220	0.326205683852921
MPK3	0.32563083752534
Os04g0338000	0.325233850950609
At2g33490	0.325056906458548
TRB1	0.324701405849891
micu1	0.324419174245462
RAE1	0.324287860821746
OBE3	0.324002362185307
RPS29	0.323141931926181
LFG5	0.322878928417209
NADK2	0.322697400886257
Exosc4	0.32238967412429
SWI3B	0.322383658391247
MYB44	0.322366920230959
SPAG1	0.322292975604039
CYP40	0.322039148067845
frr	0.321723073385577
At5g53940	0.321615336231138
Eaf	0.321184523874606
SCL6	0.321138865735478
GLR2.7	0.320752650769097
FRO1	0.320593189920048
COP10	0.320227542860045
ETFB	0.320190258332779
Fbxl2	0.320119084044629
NFYC9	0.319978057133401
YSL6	0.319456510428409
CESA1	0.319124099666532
CBK1	0.319099668467145
At4g09580	0.31874788258555
SEC23	0.318659922732191
MPK16	0.318096265847533
jade1	0.3180473756632
WRKY34	0.317515746319125
Pdap1	0.317407734679614
BPM2	0.317345058313191
PCYT1B	0.317234705924617
PAT07	0.317193476112492
ilvH	0.317031186366629
NPR1	0.316784880251781
AMSH3	0.316465395338829
leo1	0.316423338910012
PBA1	0.316373952867077
BADH4	0.315882543655694
At5g50170	0.315828495292028
At5g39410	0.315783065244282
CYB561A	0.314949937904292
ASP1	0.314717679448086
FBP	0.314611221992645
apgM1	0.314598030127715
RPP8L3	0.314585966086151
TAF1	0.314432285366717
NHLRC2	0.314018791376121
FIM1	0.314013035198023
Ythdc2	0.313905308159769
pli1	0.313892716288036
LAT52	0.313532320202993
Trip4	0.313480166203708
RH41	0.313367684775494
SYP24	0.313103142831715
TCF25	0.312971719557038
SLC25A16	0.312958398618005
SS2	0.312907476672903
RABE1C	0.312762645513691
At1g67325	0.312312520068304
ATP6V1D	0.312247343756353
ITN1	0.312151095061166
PCR10	0.311837304515556
AGD2	0.311728370311369
Pabp2	0.311412954776107
RBM38	0.311397170881737
Ccdc22	0.311243961153169
ERF1-3	0.310922123005308
PAP4	0.310109788832585
DDB_G0282237	0.309820692937969
DIT1	0.309794128836992
At4g13360	0.309535917473655
GAUT1	0.309453878412561
At4g17486	0.309252755236621
SNL2	0.309252563547754
DHAR2	0.309106807074984
PRXIIB	0.308973931531773
cox17	0.30892266757655
At1g51060	0.308921538547284
PUB44	0.308856307356394
DRT111	0.308699444560353
MPK9	0.30860138472076
SIP1-1	0.308541907942981
Gba2	0.307769533948085
HT1	0.30744351317816
NTMC2T6.1	0.307280624153345
Znhit2	0.307257622053008
STK16	0.30718616141043
CAF1-11	0.306857921817893
Lsm14b	0.306842658194669
Entpd1	0.306731836319608
RTF2	0.30638529565823
SUPV3L1	0.30617559094907
cid11	0.305948322474989
FKBP19	0.305851478057433
FPA	0.305840736922547
PRA1B1	0.305830090788696
BKAPPA	0.30486823345073
UTR2	0.304740433098694
TMEM167A	0.304655107596896
DBP2	0.304589736866354
SNX1	0.304556612890141
psmg2	0.304333665020769
polk-1	0.304303669804728
ARR11	0.304099958505704
Lsm8	0.303977824617855
At5g67200	0.303957034781919
APX3	0.303882277762111
At3g10130	0.30376687898854
RABG3F	0.303729411140776
txlA	0.303646514198698
Lipn	0.303521950547112
BAM2	0.303161539853403
At1g67360	0.303020551570634
SYP32	0.302742236072988
IP5P15	0.302647461246904
Pcbp3	0.302596184280771
vps29	0.30246178795413
PSMD10	0.302170106060629
LUC7L3	0.302126026994908
esyt3	0.301788482035035
BBR	0.301651712826559
AL1	0.301228664278965
cwc15-a	0.30053694730094
RIN2	0.300467318931036
DDB_G0272484	0.300460101619109
Os05g0446300	0.30027392956864
NLP2	0.299889406045958
PFK7	0.299632722707933
ENDO4	0.299626731933297
yuiD	0.299546359928443
RBX1A	0.299519675254145
PAP8	0.299466235601024
CYCC1-2	0.29935426112671
ELOC	0.29892444285557
ANN5	0.298824021183662
ranbp10	0.298597979797095
Aimp1	0.29780805458891
At2g45640	0.297558921446665
SIZ1	0.297156128080242
SLP2	0.296788195348136
HTATSF1	0.296689380440452
VIT_01s0010g01870	0.296673669774215
XAF1	0.29627380716164
MORF8	0.296273307622805
HSP70-15	0.295970836718767
SBT1.7	0.295962407031531
PUB10	0.295510352412308
NDH2	0.295373878478054
Gigyf2	0.295232206823248
ECA4	0.295128132466586
PEX4	0.295086071223259
BLH4	0.294953468839162
SOT5	0.294926716559084
Nemf	0.294345846532196
SNX2B	0.293864304749473
ATAD1	0.293765097923521
MPK10	0.29360630769165
PPT2	0.293529031708891
DOF3.6	0.293364302458017
KIC	0.293279473251543
SPAC2F3.16	0.29308714070024
LYM2	0.292946643785317
MRS2-3	0.29285824591362
At2g25430	0.292815402942405
DRP1E	0.292630588374044
CALS8	0.292122073246395
SPCC1235.04c	0.29190701870299
CYPRO4	0.291817829689198
Mbd4	0.291814118438016
GLCNAC1PUT2	0.291382007322259
PEX13	0.291240382210941
OsI_11177	0.291125369584933
yju2	0.290836871414578
At4g21705	0.290480388475365
Txnl4a	0.290440040308618
ABCB2	0.290374132518537
RPN12B	0.290044842876631
CWC22	0.289536599888239
SPBP8B7.18c	0.289210556667651
FHT	0.289060076274411
UBC35	0.289058297957531
tmem120	0.288958884380117
CXE8	0.288846725316795
Npepps	0.288678046928558
KATNA1	0.288585680317436
CBSDUF7	0.287874737928959
Xylt1	0.287816384184141
RAB11C	0.287751392136922
ARI8	0.287560685742514
UBAC2	0.287538723959979
Nudcd2	0.287530661856175
mul1	0.287162192298101
Exoc7	0.287065100224443
AFC3	0.287035529794774
LOX1.5	0.28670280617628
auh	0.286689505139481
At1g08880	0.286572724391792
At3g12260	0.286513008616695
SUMO1	0.286223316746382
UPL5	0.285733848073032
tal	0.285709421070951
At3g47300	0.285678840922472
tmem208	0.285632264508288
At1g67300	0.285410464061101
Rasa4	0.285387862031681
At1g61280	0.285311193646377
At1g47710	0.285203963831308
YSL8	0.285068511285104
At3g26560	0.284995392263334
TFIP11	0.284722636146823
MSH6	0.284629959824383
ORP1C	0.284574439238719
PUP1	0.284474290157004
At5g24080	0.284327473280632
SLY1	0.284325720597208
NTAQ1	0.28423934177369
HS1	0.28406333358099
NPY2	0.283622898952518
Npc1	0.283589159548828
SGT1	0.283486890732544
UBL5	0.283063351394578
FGFR1OP	0.283051168526753
dis3l2	0.28284430627275
ATL6	0.282452490242162
MALD3	0.28244322471251
Dolk	0.282315459820746
At3g12350	0.282065920354009
PEPKR2	0.281772494392021
TUBA	0.281436657567913
Ccdc12	0.28142056876199
fhl1	0.28137660772327
CCDC130	0.280839741366005
PNPLA8	0.28053034185525
NEK6	0.280483552254282
PAG1	0.280231477184747
SEC14L1	0.280162984668765
GSTZ5	0.279893396100603
BSDC1	0.27986332429329
Os05g0567100	0.279784020727014
SPT16	0.279779402368479
TAF9	0.279486707631864
PCF11	0.279393358546449
TMEM184A	0.278978753891276
Pcbp4	0.278779358764716
At5g53320	0.278724585500253
LWD1	0.278470363016308
At1g55000	0.278097978861149
URIII	0.277814450730313
SHKA	0.27767204806655
CUTA	0.27705873792762
OEP61	0.276952267377781
med14	0.276542657533732
DNAJC13	0.276389621037383
OBF1	0.276143280235768
NRPB11	0.275849839188638
RPL28	0.275301727975778
At1g70590	0.274865348348122
SEC15A	0.274728744290661
AUX22B	0.27465513587704
CYCT1-3	0.27464969492399
ORP1D	0.274156176701228
COG5	0.273749975019598
SRSF2	0.273413951900744
VHA-F	0.273409506696465
smc1a	0.273228761391009
ATG8F	0.273183499600091
At5g47540	0.27314086335004
ctdspl2	0.273140813175204
Lsm7	0.273087248089018
CESA3	0.272739329761277
pin4	0.272175654714848
ASPG1	0.271830488015842
MUR1	0.271751279699564
RH42	0.271199276610329
Nfrkb	0.271193324330551
RH33	0.270898553403993
BQ2027_MB2253C	0.270499248200777
lactb2	0.270452199750281
CCDC124	0.270141509406037
UBXN4	0.270131721194738
U2B	0.270053653840308
folD	0.270017854305787
GPT1	0.269861660489189
MSRB3	0.269547806529328
RTNLB10	0.269452183397236
SPCC23B6.04c	0.269386779236813
MFL1	0.268970721182279
psme4	0.268796016578649
GATA1	0.26840842647688
CDS1	0.268115319393579
HMGB1	0.268007248493318
sf3b1	0.267772195720928
PA1024	0.267758206460636
serinc	0.267444247877952
ECH2	0.267229544444512
mrp	0.266506324087907
BCAS3	0.266190080387554
RAB5	0.265651958529864
der	0.265454615122303
TOR	0.265449632008465
ACS12	0.265423592984886
At4g19900	0.265294006717696
sst4	0.265140226490408
TAP46	0.264814997802695
UGT86A1	0.264775422280063
CCDC174	0.264696330271064
PP2C38	0.264599763415835
PEX16	0.264479624306453
rhp16	0.264055877910937
AGD14	0.263922405056435
SPAC31G5.05c	0.262871640323278
GTE8	0.262598356982274
TBC1D22B	0.262353134627475
rub	0.26233543204316
lnpk	0.262289633999406
otud6b	0.262280356088351
At1g76200	0.262137762121943
Tmem87b	0.262068325893803
MBD8	0.261975774945808
HVA22K	0.261615044267632
tbcb-1	0.261611178291314
At3g02290	0.261215585553244
At3g19950	0.26119702026825
MKK1	0.260930121971951
CS2	0.260864824145521
MBOAT2	0.260854688717691
Dnajc17	0.26045455711024
CLPR3	0.260407589859833
SPPL2B	0.260282791299817
TFT7	0.259992441048166
LACS1	0.259728890823824
prfA	0.259360131875894
PAB1	0.259147405753887
YTHDF2	0.259096177368964
SAE1A	0.259072709877589
NPHP3	0.25904875103895
MUB1	0.258930593393329
At1g06690	0.258486305936895
AF_1297	0.258369286595921
MOT2	0.258276249138622
SBP1	0.258256771960321
SPAC5D6.04	0.258238814362798
PAA2	0.257710767304853
maf1	0.257666132959089
ATE1	0.256660938302743
CYP76C4	0.256451784972503
AIR12	0.256439880121535
ST1	0.256057979659278
At2g41040	0.255977332586602
At1g78280	0.255766761911322
Gpalpp1	0.255597999822854
LOX6	0.255283265855385
PAO	0.255151404920472
CCR4-6	0.254953526530269
PVIP	0.254321182686734
KCTD9	0.254182953699331
CKX7	0.253849517262524
PSMD1	0.25324979661807
MAD1L1	0.25282776058879
Acy1	0.252269692583448
BIM2	0.252137160338318
Ercc8	0.251955065695551
LHT1	0.251855433808804
CREG2	0.251732608246926
SPAC823.11	0.251700687745983
[truncated: 2,548 more rows]

## Sheet: CL153_700vs380
Gene Uniprot ID	log2FC
ISPS	9.88897890390852
ERF025	7.79249923121271
OPR1	6.88977254544269
S-ACP-DES6	6.1346255926991
VIT_19s0014g04930	6.11195056980575
TYDC1	5.99868022866149
CYP750A1	5.97521302000896
AFS1	5.86197812381955
SULTR3	5.66974317202824
PIR7B	5.46196787044781
CYP82A1	5.21174388942357
MYB113	5.20320219665201
tlp	5.04267185460277
PRO2	5.01368902844279
CYP71A2	4.96973070253084
Gulo	4.9452427031757
C12RT1	4.83665938213651
NPF4.5	4.79739184079782
UGAT	4.76546850009855
Os03g0651800	4.73809416585252
PME54	4.69430269718034
gdhB	4.56640491501991
COL2	4.56335259469494
CCD7	4.53038977491458
WRKY56	4.52990296053252
sec14	4.49759149373036
PHT1-4	4.46304357599108
At4g01130	4.43420862246694
PME53	4.37895077825007
LAC11	4.37557407426836
DREB1B	4.37099525981287
At4g35180	4.36638895215269
XTH23	4.34774348705002
NAC068	4.34683727160268
INV1	4.32345387767295
PR	4.32025186421221
SPBP4H10.07	4.30784800966139
PIP2-2	4.2787490618681
DES	4.1586990764292
At1g07440	4.147257595139
LAC2	4.04821105559123
DREB1A	4.0420449656319
FAO4A	4.03659931074271
SPAC2F7.02c	4.02691233985712
MYB305	4.01990682293767
At2g32990	4.00468839427644
ANT1	3.97957424242384
At1g67750	3.95998238501953
PI206	3.95148673831648
NEC3	3.93438661015727
XTH33	3.92934595534974
Os09g0529100	3.92877060683119
LAC12	3.90631277186268
GT4	3.8695262686758
UGT74E1	3.83013396440946
At1g48100	3.82816721186013
LHY	3.7318960212825
RAX3	3.67867220446103
PUP4	3.66474441116542
LAC9	3.65424632267562
At4g27290	3.63697502132058
PER11	3.61084611835949
COL4	3.6004687605626
GEDH1	3.56777188323419
CYP75A3	3.54877082833104
PECS-2.1	3.54608413840529
CHIT1	3.53739514281383
MKK4	3.53292544666634
ALDH2C4	3.53166067086142
SN1	3.49478713732078
mhkB	3.48578564857917
CIPK5	3.46660868550365
CYP83B1	3.46584490980654
ODO1	3.4419490372219
CYC02	3.44186965587563
Bp10	3.42941291057785
At5g42250	3.42663535053002
At5g37690	3.42464809783715
ATL3	3.41418265085174
CYP77A3	3.39413711846242
BHLH36	3.38422155408136
CHIT1B	3.3696638605075
MYB46	3.3532331266585
NPF6.4	3.35133241061567
TIFY5A	3.34818622470679
BXL2	3.34011257829833
MYB4	3.32362048766098
NIA	3.31848496749071
hsd11b1l	3.31129046925502
At3g61260	3.30857187331184
ATL52	3.2989632607492
SNAP30	3.25543266386549
DDS	3.25510798375094
CYP75A2	3.24213463910793
CCA1	3.23789562214829
GMPM1	3.23706823158489
XTH10	3.19674413668121
PR-1	3.1796929133782
SCPL27	3.14565411848717
SOT15	3.13518278056913
At5g24080	3.11242797224937
CYP71B36	3.10677867072331
EGC1	3.1039199703489
TSB2	3.09792069504968
Xyl2	3.09743832525965
PME8	3.09606564788748
SN2	3.09499628792402
BGLU18	3.09385285254938
CHN50	3.07658700710183
CML4	3.07081436966331
BOR2	3.01987968861652
mkkA	3.01021887605827
Os02g0491600	3.00854196961345
ATL15	3.00088328891751
At3g16150	2.99806045527232
At1g68200	2.98143179656589
aroE	2.95341477278625
SERINC3	2.94810996413621
PPD	2.9463312072803
PHO1	2.93513699716339
AAE3	2.93414075381756
NPF7.3	2.9207770295
ERL1	2.89930458422025
ERD3	2.8835834267605
rnf44	2.87959172012542
STP7	2.87957886187104
BGLU24	2.87790337974951
CYCU2-2	2.85104129551649
THE1	2.84889375736745
At3g28850	2.84691761154331
IQD31	2.84280622906986
GPAT6	2.83056663690677
At2g23540	2.826160839992
ANX2	2.82109266440077
PER72	2.81297098968511
CYP75A6	2.80253984243247
At1g75040	2.80022865689347
LAC17	2.7913853760192
MYB12	2.76070462466203
PUP21	2.76065676935125
CDF2	2.74863515839223
casd1	2.72876610803668
At4g13710	2.72621262845157
At1g61490	2.7252257370658
ACO1	2.71966414450812
gpmA	2.71502622900807
INV*DC4	2.7061733344171
RLK1	2.70563809406399
SOT5	2.69332585886185
BAG3	2.69174146008749
At1g12200	2.68835065032076
At1g22220	2.66864482981921
HERC1	2.66546006137718
XTH9	2.66483158812311
At4g39010	2.65881667316745
SSL12	2.65070344513932
CESA6	2.64116923512787
Os03g0405900	2.63696106468517
CCOAOMT1	2.63648086762287
At1g18980	2.61496047898969
NFYB5	2.61335125849558
ABCG36	2.61327620885745
SBS	2.60488148928278
PIP2-1	2.59397373592794
XTH16	2.59157698133644
Tmem189	2.58807772954067
DRT100	2.58461499636818
ACS3	2.5784405268353
QRT3	2.57025826437345
FAR3	2.5630624687411
GAST1	2.54829398331687
BBE1	2.53723294888355
At1g14780	2.53539616449134
ERF023	2.53424839827519
MLP423	2.52861424301145
BON3	2.52637385023362
UGT76E1	2.52264537430014
GASA4	2.52069454148489
ZHD1	2.5199391216685
At2g45750	2.51725129430298
RVE3	2.51446259396634
TIFY10B	2.48610759570437
CYB561D	2.48072599847632
GPAT8	2.4686984871169
ROPGEF1	2.46820920552996
SKIP25	2.46387083131125
AMT1-2	2.46131924278802
BAMT	2.45743673333611
FOR1	2.45652115088366
At3g47420	2.45353264814657
CYP707A4	2.45068144386611
FLA11	2.44668921823746
ENODL1	2.44474799993031
SD25	2.44115997187673
ZAT11	2.43780417533152
SOT14	2.43558799736245
LAC7	2.43231154325587
WRKY41	2.42886347946063
BGAL1	2.42595774544928
ABCG10	2.4243860255793
ACO4	2.42120174906633
RSN1	2.41591085585503
GLUA2	2.41127315641722
At5g63180	2.40508693037595
At3g10080	2.40072630139984
At4g36180	2.39972941308088
BXL1	2.39962368544561
RPK1	2.39549011761153
PRXL2A	2.38872261240697
BHLH27	2.3881098649169
CYP78A3	2.3879110470057
WAKL14	2.38562578202319
At5g33370	2.38518811188473
GATA11	2.38425833494923
At1g33811	2.38368488354496
HST	2.38350594241748
KIF15	2.37118552595144
PAP20	2.36637136573805
BT4	2.35931418369576
SYP112	2.35804450989142
SPA4	2.35497349675445
TIFY10A	2.35141420290013
At5g45950	2.34936099102513
SCPL24	2.34916731957533
3MAT	2.34545412940492
BHLH92	2.34442427526899
IRX12	2.3375319471189
At3g56230	2.33461008669791
CG7694	2.32845305702783
EXPA4	2.31904031561444
CIPK14	2.31884266234676
POT2	2.31082915389184
ABHD6	2.30677644763208
SERK1	2.30644043523614
AAE6	2.30547820238368
At2g17570	2.30122555380485
CYCP3-1	2.29215909304794
ucpC	2.29162734258936
MYB306	2.28641999757633
AUX22A	2.28131995983655
At5g45960	2.26488668321065
MAD2	2.25699757402436
ILL6	2.25541441613088
WAKL1	2.25200899247548
At1g74360	2.25194630709722
PME12	2.24529710021674
GES	2.24168400589467
At2g19210	2.23896131350459
SCPL35	2.2386454364696
UGT74B1	2.23794880962355
ACT-2	2.23417697267181
AS	2.23078249057262
SPCC757.02c	2.2294447312679
LRX2	2.22570769627292
COBL4	2.22440660211323
GUX2	2.22306299614214
XTH6	2.21580885757625
At1g07160	2.21535372732662
BAM1	2.21503467782916
MLO4	2.21178822651375
HMGB6	2.2090884322758
Cdlc2	2.20014141648093
DOF1.4	2.19968179858169
TIP3-2	2.19161804295126
WRKY18	2.18127833404213
PUB8	2.18095435062365
HTH	2.1725832206219
ATHB-13	2.17148696855746
DREB3	2.16901672337365
SPAC5D6.04	2.16551344225498
RBOHA	2.15531166361281
NAC074	2.15407359448856
ATL24	2.15076302794267
IRX9	2.15064746474806
MLP31	2.14741748949961
ACO3	2.14270100434131
CSLA2	2.13940437042119
RGA4	2.13878273591716
BGAL3	2.13711769787873
At1g68190	2.12853619410508
GH3.1	2.12748339734514
nphp3	2.12705014023903
CIPK2	2.12685083285207
KCS3	2.12236589207893
At3g06035	2.11900154926885
arc2	2.11537610030333
RPT2	2.11373134813839
NAC100	2.11309246986441
BAG2	2.108019446007
SLC25A29	2.10524104038339
hdhd3	2.10234858485416
At4g27190	2.10093983127919
At3g50280	2.10070070026709
At1g49405	2.09706367208786
SEC14	2.09585816519183
PER43	2.09418435195926
ZAT5	2.09137710139144
HVA22E	2.08875880722849
CML44	2.08794066170711
NAA20	2.08529619650067
WSD1	2.08506235639244
TUBA	2.08371181602484
PBL8	2.08150580234661
At4g11680	2.08085049762877
TPPA	2.08045076323622
SWEET2A	2.08003774924699
CXE1	2.07887493773983
PUB23	2.07335643313089
RABH1E	2.07299481073028
At3g16560	2.07264171320443
ERF114	2.07169624815564
At1g60630	2.07143756995439
RAC13	2.06673063097744
PAT18	2.06643706239599
YLR126C	2.06216233471244
At5g08350	2.06111648145485
CRT1	2.05560235043966
ROPGEF8	2.0501799096385
PP2B10	2.04363078293439
RABA4D	2.04353703919432
BA13	2.04168279878381
DFR	2.03960111047178
ALD1	2.03575649786079
PIP1-2	2.03449325151371
REM17	2.03314288158201
CSLD5	2.03200199234578
At2g29640	2.03084871583289
DAT	2.03040534803048
PATL4	2.02594795818245
At5g20640	2.02480312284247
CYP86A1	2.01385230782781
CLE13	2.01208442356277
CXE8	2.00539335042562
PME34	2.00273571414716
CCD8	10.6991994138541
nep1	1.9972224330057
CYP86A2	1.99146490409856
UGT76E3	1.98906093274337
At1g28695	1.98403754836152
BMY1	1.97922295345957
CRK	1.97612124907237
nadB	1.97416183480066
BHLH113	1.97199111482525
FLA17	1.96779819013918
TIP1-1	1.96617103354775
KIF18B	1.96128980749275
TUBB8	1.95423883238417
At1g28570	1.94852881646789
At3g08680	1.94600842070816
Os01g0705100	1.94296323001106
CYP82C2	1.93706672196185
NAC043	1.93645694999559
CYP98A2	1.93477620612464
EFR	1.93314937769618
Mapre3	1.93220126305436
GATA18	1.93211742533162
At4g10260	1.92963746975249
BG	1.92531967862978
BAM3	1.92495243167765
At5g23160	1.91789789185606
PER3	1.91749040335077
GATL6	1.91189266303052
CESA4	1.91108823248242
SPA3	1.91067323260282
BQ2027_MB2734	1.90986881118984
HMG1	1.90820103757214
NAC007	1.90634230741288
At2g42960	1.90177075643446
HMGCL	1.90171360797048
ASPM	1.89770212021068
Stxbp5l	1.89252340069634
CDC2C	1.8897655888792
BHLH32	1.88889305334087
At3g19950	1.88672536159896
UGT79B9	1.88574186529929
GAUT12	1.87783110589517
co-2	1.87782458558293
METK5	1.87652984974599
POPTRDRAFT_823125	1.8735276987171
RGA3	1.87343030697248
PLT5	1.87326606589983
NECI	1.87288963904709
At2g04570	1.87224771013691
GLIP5	1.87097897223629
ANXA3	1.87084587816047
cdc20	1.87001537153666
KAO1	1.86909453357151
NIP5-1	1.86846167900705
PRE3	1.86356452555047
CRK6	1.86245689099403
NPF6.2	1.86015594398448
PLC2	1.85804034479549
IP5P11	1.8577474921656
PME40	1.85651213253462
MYB86	1.85440148360039
At5g45910	1.85052675158058
At1g19940	1.84915889923415
RTNLB17	1.84741299918544
GPAT2	1.84275440907712
Tlcd5	1.84033423688585
EXLA1	1.83997752882473
DOT3	1.83516524441702
SAMS3	1.82888148717985
LTPL1	1.82726911284325
UGT83A1	1.82709669990329
MAP65-8	1.8239846220196
COBL7	1.82373277298704
CSLA9	1.82160054067888
BUB3	1.82035998792692
At4g37250	1.81999168851766
FLA9	1.8073665510493
eas-1	1.80618896111554
REM15.15	1.80567998244562
shmt2	1.80258161293874
At3g62470	1.80251032037058
WRKY75	1.79981599392581
glnD	1.79671491605571
DIR1	1.79638587888621
PDV2	1.79609942005113
PLD1	1.79381745554648
FPP7	1.79220688755081
4CL2	1.791845127246
RROP1	1.79097335803184
ncapg2	1.78908529975755
GAE3	1.78893769250928
NAC090	1.78653755157988
CYP73A4	1.78596885359568
FBL3	1.78566862646147
FLA6	1.78340876889803
ACA9	1.78301423762283
At2g29380	1.78185016917125
GATL10	1.78103684260919
CTL2	1.77624347684844
ERF1B	1.76940895892246
BCAT2	1.76779957733833
MPE3	1.76745843737336
CESA8	1.76729567572989
TIP4-1	1.76685347533029
COMT	1.7650650554821
PER42	1.76410251163583
TOP2	1.75956202223896
At3g50810	1.75697362695391
WNK5	1.75572358058397
FLA8	1.7535967731455
CHLN	1.75357071843875
NAI1	1.75345014734236
KOR	1.75313016811058
exoc8	1.75095804446483
gacA	1.74980707554428
HVA22F	1.74902949186231
At2g17940	1.74890499479096
SPX3	1.74832666632701
ANTR3	1.73588075044054
SOC1	1.73391308798826
At2g40270	1.73162339295665
At1g28580	1.73120730282914
GAE1	1.73045700305186
ARR17	1.72876751737264
Ank2	1.72765986347883
ALDH2B7	1.72751335006707
HHT1	1.72724562638405
ABR1	1.72384274406411
ADT3	1.7207115646926
XTH8	1.71597550101536
MET2A	1.71492134368774
At4g31140	1.71246173060203
At1g61340	1.71072380388143
SHKA	1.70919368508583
UGT74F1	1.70780895644306
ERF034	1.70761103825211
ubq-1	1.7057307263107
ARAC7	1.70428599582975
LBD12	1.70398848005121
CPK20	1.70063992985554
NAC072	1.69836999729711
MADS3	1.69722331190056
At1g17710	1.69721802971642
LOB	1.69001454960231
AZG2	1.68876954759996
EP1	1.68746001239607
GRXC6	1.68726528585516
Slc29a3	1.68597955486184
BHLH18	1.6815812463399
AAE20	1.68153915715103
GDE1	1.68098039858057
SCR	1.68040961592976
rbm24	1.67876368459599
METE	1.67666895604538
PMI2	1.66948031874029
UUAT1	1.66868492602088
CSLC4	1.66786873240333
CYP86B1	1.66611893852416
CAD1	1.66597318694689
TIP2-1	1.66386066375959
CPR	1.66278234436371
Map3k1	1.66198270821913
ACA2	1.66038602244173
GUX1	1.65413397294531
Skeletor	1.6507750201557
CASD1	1.64827940732838
XTH15	1.64663131639277
At1g51440	1.64475097260098
MODA	1.64163378569269
SPX2	1.64063878516051
PUB27	1.63886440525688
plcN	1.63828679043072
FLS	1.63689559308443
CESA9	1.63677615385164
GMGT1	1.63565568115568
PUB7	1.63560685633407
At2g42990	1.63523602642536
ERD10	1.63296567676746
UGD1	1.63136624340534
KN	1.62322674913357
UBP12	1.62201484052808
EPFL6	1.61839670972868
ASAT1	1.61765315461481
tag	1.61568243188901
LRK10L-1.2	1.61383119107918
SWEET2	1.612290282319
At1g75720	1.61187951702813
GT7	1.61020557446892
GRXC9	1.61017966239384
MLP43	1.60838936246046
PERK13	1.60669743982327
ARAC3	1.60570879209438
VIT_09s0002g03780	1.60465708901561
At1g55760	1.60416361200609
GP1	1.59991438195198
GSO2	1.59981700717056
IAA7	1.59619958342449
CXE17	1.59607905110218
RHM3	1.59601245515564
At5g48740	1.59577600879439
HSR201	1.59436182319495
UBQ3	1.59071186859779
PMEU1	1.58874517243659
LBD39	1.58733403589824
FT1	1.58640664297071
BGAL16	1.58631471854152
NEK5	1.58511646890258
SAMS2	1.58490092774685
Slc25a3	1.58173303608376
KIN14N	1.58080846690743
BHLH120	1.57634765874072
UXS1	1.57623780577089
At1g32860	1.57574737401791
MAP65-3	1.57492595675846
ABCG23	1.57466225738405
RABA5C	1.57399159696219
At5g18500	1.57369301639462
SUS2	1.57120550715561
LTP4	1.56918316520239
PER12	1.56845409103773
GAPN	1.56709851994951
TDR	1.56493451117357
kif6	1.5629983558245
AGL62	1.56064474135167
SKP2A	1.56024109151693
FAF3	1.55986301363326
FLA1	1.55913812477391
ABHD17B	1.55622225031727
TTC7A	1.55378665465573
TIFY6B	1.55087482508527
TFT4	1.54765500682227
SDE3	1.54747824742026
MIMI_R707	1.54684188431664
NAC029	1.54632916745232
CESA1	1.54416473269582
At1g18250	1.5385369312795
SHN3	1.53815876407604
TPP2	1.53561609355905
PAL6	1.53324114287199
At4g00950	1.53307352240435
spg1	1.5328641064241
At1g29670	1.53257116681826
CSLC8	1.53170790638373
PUB28	1.53002803267287
PDLP8	1.52851174843356
At3g05150	1.52651555122089
AGP20	1.5215617211213
HMGB7	1.5205393280341
dnajb6-a	1.52013923642832
ABCB13	1.51934590072293
NUDT18	1.51902925513272
At3g14260	1.51800248414376
At5g20260	1.51673564827851
ATC401	1.51419853038453
SCL15	1.51397919865501
ROPGEF2	1.51328387016653
PAP17	1.51228317245288
PIP2-7	1.50727534975055
UGT75C1	1.50721060548003
GH3.3	1.50513428196758
mip120	1.50445973456077
IAN8	1.50403649769906
RGI3	1.50300071997863
PUB19	1.5023919590923
PIR7A	1.50232412881183
At5g25090	1.49695701146583
At4g38062	1.49403649684815
KAO2	1.4933230048541
uxs1	1.49302308982426
ZAT4	1.49286535012949
At2g26730	1.49105880353479
COP1	1.49070904077574
CYCA1-1	1.48981035969092
CYP77A2	1.48977419673885
CYP84A1	1.48963592940015
WOX4	1.48707081268338
UPS1	1.48525123769468
GATL7	1.48455062346892
ZIP5	1.48161706427135
DRIP2	1.48160549525656
BAG4	1.48009842542969
Os07g0688000	1.48003528134376
TDT	1.4800157286595
WAK2	1.47974884814486
BHLH74	1.47687906563004
CML38	1.47632396868613
GSVIVT00026920001	1.47327779825121
mycbp	1.47210557785307
KCS1	1.47193361277587
NPF8.4	1.47074818138013
FH11	1.46982976746223
GSO1	1.46956995535701
MFT	1.46936054146668
Notum	1.46884244583674
Noc_2493	1.46790458766015
At1g12663	1.46780447313539
At4g28780	1.46736484430842
CIPK11	1.46450968755329
CIPK1	1.4635707386761
VIT2	1.4588600098045
RTNLB9	1.4571956498306
CM1	1.45639099194528
KCS19	1.45521416709711
APX2	1.45473985592415
At1g14390	1.45433332031187
ZAT10	1.45307607979572
SQE1	1.45173494198012
PPA1	1.45148204979373
DDB_G0289029	1.44741990369984
GAE6	1.44728374848416
desi1	1.44406209324158
At1g75280	1.44201732940861
VIT_17s0000g00560	1.44129276773222
CSLD3	1.4406534070525
SKS1	1.43959459947836
OsI_021818	1.43699476420768
XYLT1	1.4312382619013
SPAC24B11.05	1.4291318288611
At3g47570	1.42821678049965
At5g16590	1.4276122889702
DDB_G0267514	1.42626130437026
PVA22	1.42318293102466
LAC3	1.42159471282418
MRS2-2	1.42119605587372
EPHX2	1.42063500409229
Caskin1	1.41941165804826
TSPO	1.41846189491966
IRX10L	1.41272798239299
At1g25530	1.41154739345979
OsI_033149	1.41113264509852
ado-1	1.41108242661518
CYP74A	1.4100021773883
SYNC2	1.40953397691456
dmpD	1.4094630032916
CRF4	1.40909393894715
IAN10	1.40786933073493
At1g66480	1.40693822361745
NPF6.1	1.40200714167834
ANAC094	1.39840397552945
MDH	1.39791823986255
PDR3	1.39758767432587
At4g18380	1.39636952683571
At3g07010	1.39601438523389
LIS	1.3942012496265
Ehd1	1.39404255345066
D4H	1.3939169378332
PUB25	1.38663099251524
At5g59540	1.38641610823007
At1g72540	1.38307939820226
At4g02110	1.38299445379986
Uxs1	1.38272034210438
YML018C	1.38184964093587
DOF5.3	1.38176308553176
DTX19	1.3814692208365
CESA5	1.37909342243881
NIP1-1	1.37875879453599
LTI65	1.37801772391517
At5g64080	1.37664914429757
NCED1	1.37521797427791
PGDH2	1.37414202907307
CYP94A1	1.37334357799736
At1g58390	1.37111371813144
MDIS1	1.3696081480568
UGT73C4	1.36525693251001
SE2	1.36446718847263
ucpA	1.36416640990489
FATB1	1.36401508623699
CYCD4-1	1.36390563318704
CYCD2-1	1.36196087234959
ADK	1.36067643426521
NTMC2T6.1	1.36059370458085
PUB16	1.36014941896555
AUX22B	1.36013517138469
F8H	1.35936081947028
CYB561C	1.35885664036162
PME22	1.35778439980918
ATHB-7	1.35759644148026
UGT87A2	1.35647515610921
CML3	1.35592376427286
PCR2	1.3552258984527
CDF3	1.3532494774708
ICR3	1.35186881660978
PER47	1.35146013706039
CRK25	1.34977034911693
CYCD7-1	1.34961484377703
UGT85A5	1.34934290379669
PP2B11	1.34799354201965
Tlcd4	1.34491397866616
GLU3	1.34488026754438
At3g47200	1.3442677705939
KCS11	1.34363554748354
CYP76C2	1.34045588340501
At2g32560	1.33484168257649
DGAT2	1.33467620830287
OXI1	1.33461978661064
BHLH110	1.32881341329918
TTL1	1.32756107534873
PDR2	1.32507902955788
At5g58300	1.32259989580401
GATL1	1.31989124528109
CODM	1.3169391562597
PBL11	1.3169237839393
4CL1	1.31342370559309
RABA3	1.31191764423685
XTH1	1.31101414649813
CLC-B	1.31072902192461
AAP7	1.30909677088003
BHLH111	1.30861275876756
At5g39030	1.30563959116003
CML10	1.30445464166688
At4g22990	1.30422859023436
CYP710A1	1.30355856930489
ABCB9	1.3022009422446
YUC10	1.30175928508653
At2g43240	1.30165510951645
KIF22	1.29819173361099
At1g68400	1.29799258514629
At1g68410	1.29727911670547
UGT74E2	1.29449366320643
SLC25A17	1.29314762786158
SHKB	1.29164250446639
At2g36330	1.2908487961222
NRT3.1	1.29080140338097
RD21A	1.28623168648941
TRP3	1.28362847024005
MPK19	1.28261854385394
UBC5	1.28243267267705
NAC071	1.280802831691
PER63	1.28067879383654
Hgsnat	1.27933959170977
PLT2	1.27794097939934
CBSX2	1.27758505626979
MFSD5	1.27733743574092
GLR2.2	1.27722189638661
GULO	1.27709209045636
SCPL34	1.27135012382497
CCR4	1.27113863119397
BCK1	1.27064713586397
RLK5	1.26420970282562
XXT1	1.26148957821212
PMR6	1.26089022204704
PKS1	1.2601102474267
At5g24010	1.2579265905824
CYP734A6	1.25764864767439
At5g19025	1.25727053156757
CYP81D1	1.25496152750708
GPA1	1.2530646629993
PAIR1	1.2530068222632
SBT1.7	1.25190096582256
At5g64030	1.2518325790546
GDCSH	1.25075426940448
MIK2	1.25049512440471
CKO_02047	1.25037378222485
IAA16	1.24823656841329
MAN2	1.24768939655916
Dnajb13	1.24742395106211
GLK1	1.24680280078913
IGHMBP2	1.24525892387564
PUB14	1.2447954561075
ABIL1	1.2415407121125
Os11g0706600	1.23836162023895
WRKY50	1.23818126478452
RhGT1	1.23663292094088
BHLH87	1.23655332110266
ANN5	1.23647322085558
GATL9	1.23583951746915
TPA1	1.23444378768152
SBT1.2	1.2339795456665
4CLL1	1.2339633525599
SYP24	1.23362733175939
Os08g0126700	1.23278540936687
HSFB3	1.2325762605706
CESA3	1.22977140956727
RS2	1.22974433625814
OTU4	1.22961006297175
ABCI17	1.22901323286309
FDH	1.22850336795354
NLP7	1.22828437178956
GAPC	1.22572331085105
R1A-3	1.22507999378232
IPI2	1.22351708869729
TPPE	1.22334274914106
HNL	1.22282671969171
LECRKS4	1.22259083117301
ENDO4	1.22250969702159
HIPP26	1.22200811344609
CAD6	1.22167923826966
FRO7	1.22080315190827
CSLC10	1.22028871899127
N	1.21698429820553
TUBB1	1.21532012084091
CYP98A3	1.2138352968138
CAD9	1.21315319242884
ACA11	1.21088962492242
BAG1	1.20957643354961
KIF4A	1.2081244488799
RNALX	1.20792888061881
CML22	1.2073461784725
GPAT5	1.20697850839947
NUDT17	1.20176667032897
ASR2	1.20011018894646
ERG1	1.19913428002281
AN	1.19884273479852
BAP2	1.1976849429733
RPP8L3	1.19312165650116
SRF8	1.1926650690853
GT-3B	1.1919536274011
ST3	1.19195024202144
Arhgap12	1.19171246650658
ABCG25	1.18983217098664
ABF3	1.18772679764831
AGO3	1.18746911482031
CEL1	1.18736087219687
gyaR	1.18529621558716
LOX1.5	1.18415694232739
ATML1	1.18152489654054
At1g04430	1.18033226793194
STK36	1.17994392617045
ERG3	1.17970969344078
FAO1	1.17817775444757
SOG1	1.17583112076321
MLO13	1.17535964468482
TAR4	1.17489885753401
FEI1	1.17463314303902
DCR	1.17344407253636
PPC6-7	1.17290646925314
exgA	1.17235786597774
LAC14	1.168573731088
At2g38640	1.16800981852302
PBL19	1.16773266740472
PSY1	1.16558011218312
At1g05150	1.16482799951567
WNK4	1.16389849437304
SMC4	1.16156018953603
Mgll	1.15969478072723
DRP1C	1.15713445053335
At5g67140	1.1557616131959
At1g74460	1.15575936633196
RF2b	1.15531566202963
GAUT15	1.15433092946999
SDP1	1.15430862288022
DBP	1.15414724427466
PIP5K2	1.1539964841716
NPHP3	1.15094415437103
At3g05950	1.14960748331742
AUR1	1.14899221984759
allB	1.14854870196227
At1g06650	1.14823461010345
ICMEL2	1.14708409111835
RHO1	1.14666908799783
ASPG1	1.14551817615721
CML46	1.14548106229026
AOC4	1.14353091602051
LRX4	1.14011618790965
NEK2	1.13950325919418
At2g25430	1.13907485469166
At5g66560	1.13851304994384
CALS8	1.13736349683391
BGAL8	1.13590035797645
rdiA	1.13402914300489
HO1	1.13198791826126
LOG5	1.13124376248056
XTH30	1.12848536072172
ABCB2	1.12749042156481
NPF5.10	1.12628805962704
NPR3	1.12627441785763
At3g53850	1.12567298138401
GPT2	1.12536012018042
ARF18	1.12462356105192
OsI_15387	1.12372476489422
CPRD49	1.12352718468738
RCOM_0864260	1.12271947925997
CDC2D	1.12238291923743
DOF5.6	1.12234863746872
TFT6	1.12125698782293
ATL70	1.119993926052
CYP78A4	1.11732327180158
At2g39490	1.11661242704495
At2g33200	1.11607592028739
PGR5	1.11531825511188
NAT11	1.11399347648172
GLCNAC1PUT2	1.11385440284869
HS1	1.11333388329035
MMK2	1.112616877092
BGLU10	1.11205005323132
EXPA8	1.11031919967431
BAG5	1.10964551488765
SETH3	1.10909532977234
WAXY	1.10878373367877
ERECTA	1.10808785326875
GSVIVT00023967001	1.10767421663849
PUB4	1.10763068628945
PR2	1.10747020730434
CYP82A3	1.10732384659884
aroB	1.10510312212525
HT1	1.10507722504829
GGPS	1.10489929672998
Os04g0590900	1.10486386290875
At3g49900	1.10342740556368
HSP17.4B	1.10227398516169
arnA	1.10222833487396
CML25	1.10148419739367
H6H	1.09984174930154
Ankrd13b	1.0986006110863
speE	1.09748174849783
AAP3	1.09454265024016
LHT1	1.09291077730613
RTC2	1.0924106473772
PFK5	1.09149185535648
At4g29360	1.09061449312118
CDKB1-2	1.08756589066783
At5g08460	1.08517519032512
NDR1	1.08449441971964
Os07g0190000	1.08446419739355
ASP1	1.08428261204798
BHLH122	1.08334417586174
At1g64390	1.08276662645879
At5g05130	1.08249922401749
IAA13	1.08111056036028
Tnks	1.0758794123915
CIPK21	1.07543553834149
WAKL11	1.07470148097592
NT5C2	1.07305305791276
gpsn2	1.06955805173193
AMT1-1	1.06712511135457
CYCD3-1	1.06523914248753
LAX2	1.06238527239777
NPF1.2	1.05999961663876
RLP12	1.05950409794
ACS1	1.05937254494924
pcrA	1.05865911326781
PIN1	1.05620897202977
KIN14C	1.05594627514665
SPCC663.09c	1.05571510043292
ANN2	1.05317084488777
PCMP-H11	1.05306904064268
At2g16365	1.05162098575365
TYRAAT1	1.05091329008305
AAH	1.04943438932571
BHLH13	1.04708302241066
CAO	1.04390594910584
WRKY28	1.04338310995069
ABCG32	1.04326940596867
HARBI1	1.04296252629521
VIT_01s0010g01870	1.04080815911994
KAT3	1.04049946544015
GINS2	1.03628400941734
BGLU40	1.03593946030345
ROM3	1.0342394113893
PARA	1.03268849438601
JMT	1.03037509550897
SLC38A3	1.03015008938989
RTNLB21	1.03003396194737
IQD14	1.02990933314053
GLC1	1.02988128328032
Tmem97	1.02826344136342
MYB39	1.02783703167811
ATL13	1.02753417435598
PUB52	1.02718070629448
MPK12	1.02661279709067
NTF6	1.02649852518471
CYT1	1.0227488154712
SD113	1.02182131164471
ERF4	1.02165792321455
GLYR1	1.02108927913975
Mgrn1	1.02049093832247
At5g61250	1.01898291727129
HB2	1.01848742356664
BHLH35	1.01799047541171
At5g14450	1.01763345766761
HMT1	1.0166525140526
RIBA1	1.01473673478861
LRK10L-2.8	1.01455425099321
Tm9sf4	1.01443120290376
ATL4	1.01356228800791
CPK10	1.01305535238298
ATL6	1.01274812548058
NEK6	1.01267454839095
ATL2	1.01189431110631
AC97	1.01050848146837
SD18	1.01017098365349
PGIP	1.0070604028419
ERF2	1.00556242634523
PAL	1.00513975351994
WRKY70	1.0041273204827
FPP4	1.00162484352372
ARF7	1.0014002645833
GLP6	0.9999275597772
GDHA	0.999508552632878
SVP	0.997060750257082
PSK3	0.996803236204982
RLIM	0.9962922378129
PCK	0.995822611913487
IRX14	0.995100530786568
VAS	0.994834526345991
At1g60970	0.994224285878341
At2g30020	0.993535517342341
ABCG11	0.992918581464598
SOT17	0.99264152575908
HMA5	0.992557136653927
STOP1	0.991643350152564
GID1B	0.990436512694059
URH1	0.989701211691984
At1g33170	0.988794114592952
NFYA1	0.986148187918213
KCS5	0.983868742595343
CP12-3	0.981723720203525
BGLU12	0.981577735231562
MSSP2	0.981489941227087
KINUB	0.981472907939
SCPL42	0.980943976122995
RKS1	0.978828711791082
EPN2	0.978652242995797
CAF1-11	0.977851591892467
SF3	0.976089622908516
UGT85A3	0.975794053702204
MCA1	0.974048271940359
Mgat3	0.972909535787588
ABCC10	0.972605411696936
At4g17486	0.97210913884587
NIR1	0.970575290124267
R1A	0.970383974646673
DHAR2	0.968931759593589
AMC9	0.967576611056544
ANK2	0.967420829328542
At3g05500	0.966657393303116
ptdss2	0.96606761061821
faeA	0.964095044600788
LRE	0.964005258394365
PUB46	0.963596995809613
UNE10	0.963522957338911
FRK2	0.961033298894373
PTPMT1	0.958843125907176
Xylt1	0.957337769950792
rsbQ	0.957270016671788
FIM5	0.95721464860776
At5g16730	0.954583220872616
PP2CA	0.95423418055928
MUR1	0.953834246362857
FH6	0.952935846687262
G6PD2	0.949766339355375
PHR	0.949037544859425
PPCK1	0.94801188457879
DXMT1	0.947811777184596
At5g61750	0.946777227454647
CHUP1	0.946457981013266
XBAT33	0.943963259456469
At2g03480	0.941641477339829
CYP71D55	0.941412519908518
ALE2	0.94103219968645
B3GALT2	0.940191781708579
At5g53320	0.938377260375454
INRPK1	0.936970603750942
EWSR1	0.931963014408148
LACS2	0.931412677390715
STC	0.930375470085275
At5g27450	0.930272041051475
SAHH	0.929052454707222
BHLH19	0.928609431301779
yipf1	0.928455855084032
YKL091C	0.928284159278921
AMY1.1	0.928256707277834
fex2	0.926942936364264
NUS1	0.925976363150641
KIN14M	0.925804527616327
RPL1	0.92545308969729
CIPK6	0.925236364175816
NDK4	0.923982994121173
IPP	0.919369547199846
GAUT9	0.917986135839353
Dctpp1	0.917916264530418
CAX5	0.91772801666195
cdd	0.916569584513335
PVA41	0.916050475049655
DEFA	0.915123942808969
CBR1	0.914761669982043
HY5	0.912775739289233
PDX1	0.912602252047818
At4g18030	0.912564340924819
PRA1B4	0.91245595708042
At4g10955	0.911723446868342
ACLB-1	0.911318572677368
At1g31850	0.909425761644555
GA20OX3	0.909335517650134
IKU2	0.907730403975669
CHKB	0.906678659470384
Immp1l	0.905931602851967
At3g49070	0.90511329003965
HSFB2C	0.901858011534416
PID	0.900753684029293
AGL19	0.900036978337334
PIF1	0.899758722019591
RKL1	0.898000196106988
HSP70	0.89604732210349
ICR4	0.895645099487041
ATHB-20	0.895406226957299
SODCP	0.895292371526491
ZFP6	0.89527998374198
gpc1	0.895020509359501
At5g26960	0.89399945439716
ENPP3	0.891583402171501
Gba2	0.89071335798386
FIP1	0.886734062108427
DME	0.885800663552055
TUBA3	0.885275856308927
NPF6.3	0.885240045088601
SAT2	0.885114229264127
FTSH6	0.884590591592637
RHA1B	0.884563791725497
At5g39020	0.8829464728821
GLIP1	0.881898758151233
At1g12460	0.881321584496336
B3GALT14	0.880458081889479
RTNLB12	0.880078565312181
abhd17c	0.878719315986527
PK	0.878024464272763
CLC-E	0.877991968729538
TMK1	0.877863052506467
MPK10	0.876555130549918
COB	0.875661430826913
ATL33	0.874242594346618
BIP5	0.874072841115973
E2FA	0.87304248557175
At4g17550	0.872136345670942
Esyt3	0.870149685223484
At5g39570	0.869698209715611
PRA1B1	0.869501730375266
RAX2	0.868547861826147
E6	0.868301293814095
DRC3	0.867049107218659
At5g43190	0.866931556888519
FH13	0.865257919346589
HI_0488	0.864949731478589
POPTRDRAFT_822486	0.864730249554733
ANS	0.864681370058955
cisd2-a	0.863906865311303
BZIP9	0.863758230522962
guk1	0.863313996686916
Os03g0144800	0.86274978315798
RABA5D	0.862007954482627
CLKR27	0.861757946071006
At5g03610	0.861393339242952
Ssx2ip	0.859233364966295
DOF4.6	0.8587849134688
At5g07610	0.858108538299891
slr1419	0.858024561118545
At5g16450	0.85792246494009
PBS1	0.857713943588765
At5g25400	0.857275312237316
At5g57670	0.856910333133336
Lipn	0.856751738495166
NPF5.7	0.855106294252421
PMM	0.854758181195876
MAP70.5	0.851220576273369
CNB1	0.851135325777447
HMGR1	0.849619704891455
At1g54790	0.849163500020552
STR17	0.846743696044249
GALT1	0.845685871873425
LECRK81	0.845032354982593
BRX	0.844885663711968
BC1L6	0.844622669845346
Fig4	0.843613666338502
OPR3	0.843115253268625
BHLH106	0.84273629462418
At2g16250	0.842501741594149
XERO1	0.842063707332792
GAUT1	0.841749876901606
CNGC2	0.841121270746482
ANL2	0.841113965901658
ATL21A	0.840948730781342
SPS4	0.838995114182121
KIF2C	0.838236408835608
At1g60690	0.836773310511144
TDC	0.8361725171747
APG	0.835969305081822
At4g34500	0.834138514719327
AGD6	0.833955695780695
At5g59530	0.833121071195182
RABB1C	0.831907768561084
GAD	0.831079519581222
PAT03	0.830393341544981
At1g08160	0.830160794705497
NPF2.13	0.830057101213361
AIR12	0.828904081401528
TCP9	0.828236066336881
KAN1	0.82811838094412
YAB5	0.826915508666776
ERD2A	0.826186940688196
captC	0.825994577711109
SMT2	0.824996305257186
MPK16	0.824208118279648
BHLH79	0.82296913728663
ACT11	0.822348955825076
AIL5	0.819062084155555
tmem87a	0.818621607937918
PIP1-3	0.818518460312893
SGS3	0.81791806303148
GAUT8	0.817404847031479
CIPK7	0.816021085672976
DAR2	0.815910825889714
CS1	0.81349311240448
ATL23	0.813054756926103
SWEET17	0.812110640038317
CKX9	0.811649177348617
glpQ	0.809887341143026
SCPL50	0.809873979614382
RTNLB1	0.809316932858379
ZFP3	0.808913597694864
KIN5C	0.807183747804358
ORP1D	0.806955037310434
PFK2	0.806607798390936
At2g02240	0.805443588235924
TM9SF4	0.80504014698762
ACA1	0.803520427417767
bcsl1b	0.803282732934195
RAB11C	0.800253337770533
ARR18	0.799856728268363
EID1	0.799699627551573
BZR1	0.798717826205652
GRP-2	0.798470494912538
ABA2	0.798173630139347
CAD	0.798073695973154
RABEPK	0.798002658839581
Gpr107	0.797885732032922
PYL2	0.797092010338513
At5g24760	0.796963353658624
TRP5	0.795451296325303
DDB_G0268948	0.794282403877596
RSI-1	0.794248042092939
GATL3	0.793845896370195
clpB	0.793367600886618
ctdspl2	0.79250948667751
APMAP	0.791505979382751
RABA6A	0.789686896212498
At2g23200	0.788884472459463
SEC14L1	0.787550863796008
CPRF1	0.787338951022898
At4g22758	0.786592456251683
At1g15400	0.785628675619803
AGO5	0.784438364346036
At1g10030	0.784265565193947
ABCG15	0.783509223517356
At2g24580	0.78214287032078
CYP81E1	0.782006507128706
CEBPZ	0.781981893691307
TCP5	0.781613696990018
LACS1	0.781338189501296
AMT3-1	0.77959144543594
SYP32	0.777985692550683
CSLG2	0.776898814696548
TUBB3	0.776631953282337
topbp1-A	0.776416301791752
KIN14G	0.776261169744984
PERK10	0.775778922841528
SPBPB2B2.05	0.775579092365245
PUB45	0.774928066549843
PEPR2	0.774654643203608
NPF4.6	0.774638918246986
UBC28	0.774472368767334
DI19-1	0.774241823124399
PAP26	0.773688135911936
APRR2	0.773266552079479
ACLA-1	0.773166159709699
MLO1	0.772982575812281
At5g36290	0.772442195243706
D7OMT	0.772356049732586
surE	0.770670768470426
ADK2	0.770059054251383
CXE18	0.769838559975269
APS1	0.769717272547566
SCL28	0.76910470368736
ATL68	0.7690334637516
BKAPPA	0.768956118145421
RBK1	0.768861710497366
RHF1A	0.768572056444423
HSP22	0.76846534724703
PXC3	0.767861468299375
B3GALT7	0.767491472642221
RABA1C	0.767371257629324
At1g28590	0.767145747856072
CML36	0.767088734337486
Cap2	0.766568644385656
DDB_G0273453	0.766409516952814
slc25a26	0.765375881837751
RAP2-4	0.76300007070749
ADF1	0.760883039375698
MNR1	0.760519074249327
ayr1	0.759172153913895
GA2OX3	0.758857871274512
PED1	0.757167026176627
PAT	0.756045089947061
IAA29	0.755401979653674
SCPL45	0.755344634140141
SBP65	0.754236287958908
DOF2.1	0.753981040141317
ABCG22	0.753532241296445
RCOM_0699480	0.752854739601117
ZMYND15	0.752693443285316
At5g53970	0.752577339720295
Npc1	0.752167849466258
rhbdf1	0.751031830522464
MEKK1	0.750267207725168
PLC4	0.750121022915721
FPS1	0.74987587952351
alr3466	0.749858901277706
SAP12	0.749629989412931
DGAT1	0.749391445440379
CKI1	0.749212279901547
PBP1	0.748934728563177
GDPDL3	0.748790169678567
XBOS32	0.747587726232418
KEA6	0.747558221354151
TMKL1	0.747401863259869
SRG1	0.746425342288181
SHR	0.746250612736197
FER	0.74422457511384
SNAP33	0.742477428068594
DI19-3	0.741628658991081
TOR1L1	0.741047912176478
CPR1	0.738296897922999
COX6B-2	0.737985118653032
At5g56260	0.737605337035116
At1g80640	0.73677989947628
NUDC	0.736362761489625
Kif15	0.734383144430877
PBL16	0.732108740028599
Y-3	0.732024481886975
PUB10	0.730923016949198
trpt1	0.730214268292857
DOF5.4	0.729959502999662
LTPG1	0.729582539308329
OMT1	0.729494633832474
CGR2	0.729400534834411
HAK17	0.729300261753826
At5g23430	0.729231228179594
mcfQ	0.728893485899519
RANGAP1	0.728809632219116
FAD3	0.728540480275622
ACA8	0.726407156257785
ZFN1	0.726308214865463
LPL1	0.72599601004438
PP2A9	0.725487038502963
CRCK2	0.725205554125933
IP5P6	0.724787861613869
QUA2	0.724163463123597
SCPL51	0.723393165941133
Arfrp1	0.722792819635178
SCAMP4	0.722160584350027
LUG	0.722086283339542
UGT71C2	0.721888623952148
dnaJ	0.721672538526295
ECH	0.721397770308064
RING1	0.720936917950262
QSOX1	0.720510980613001
TFIIA-S	0.719870621259828
YAB2	0.71947344195461
ABCF5	0.718265374266751
PLDDELTA	0.717814079917901
XTH22	0.717657099077516
slc32a1	0.717083067264154
SYP22	0.71657068890903
Os10g0513300	0.71500617604449
PEX11A	0.713897792115972
MYB44	0.713802424200565
At1g80170	0.712861165441754
At3g44326	0.711057499017709
CAT8	0.709837612305787
LCAT3	0.708728069837368
At3g19850	0.708201876484749
TULP8	0.707578960441719
MCU	0.706370610382416
PVA21	0.705942996342749
kif4	0.705458898719781
N4BP2	0.705403675310968
XXT3	0.705169475387417
CYB5	0.70423651848254
P4HA1	0.702720292083266
MAKR4	0.700995471223354
tal	0.700105531142655
RTNLB10	0.699457804142347
HAUS3	0.699454546709209
Ttc7a	0.699325790306771
BHLH14	0.69916886808586
NAT3	0.698447622544214
UFD1	0.698330441619364
OPT4	0.697942242019341
PP2A13	0.697582407328885
GUX3	0.69751362200959
PBL5	0.69681602459334
Ogt	0.696308262724237
MAP70.1	0.696217480915942
At3g11320	0.695946720326379
YSL6	0.695470471792011
MKK5	0.695011459962633
KIPK1	0.694022493612491
At3g51470	0.693142805978623
IFRD1	0.691455797018527
GPT1	0.690130729853751
rbrA	0.689628173969965
PDAT1	0.688726340749493
ARPC4	0.686753219324462
PAP11	0.686181434680247
At1g25520	0.684041817809968
abhd11	0.683708690711364
PDLP7	0.682372568887985
IDH1	0.681919499655035
RABA4A	0.681632548992993
ARL8A	0.681245167109529
GUN4	0.681124211592025
Acel_0614	0.680194873197219
CAX2	0.679656127267762
EMB1444	0.679185235165493
VDAC2	0.678780351337546
LBD1	0.678558957929011
CML41	0.678266303823572
NPSN11	0.677102906150184
XCP1	0.676935478091612
At1g12390	0.676602944638227
PSAT1	0.674578220904868
LAT52	0.673953432489418
guaD	0.673175500472649
TRAPPC3	0.671657925141218
LCAT1	0.671570930497383
YAB4	0.671279733780552
MAKR1	0.669392271568014
HSP21.7	0.668749856495119
RCH1	0.667715617203055
UBA1	0.667655364996217
Meak7	0.666695643120971
SCL23	0.666052294411043
FAD2-2	0.665544591849123
mal1	0.664715963797678
EDR4	0.664504204777868
YBR287W	0.664403676733641
DNAJC19	0.664316251406318
PEX11-4	0.66381507637919
KELP	0.663177322328432
St3gal2	0.66259246571563
mpi	0.661971322655961
At1g12500	0.661505513599446
mybl2	0.660895594857026
PLL5	0.660616974107233
KCS2	0.660474963721195
BSPA	0.659737250555392
ASD1	0.659100334570766
ARF19	0.658019459734458
SAP5	0.657885147990251
DOF2.4	0.657235301881911
SPL16	0.656222319149959
DGD1	0.655499707032659
At5g02620	0.655436073617749
CYSEP	0.654736985073142
Tbc1d15	0.654578510756642
empA	0.653957962587536
At5g62930	0.653946020522134
At1g03900	0.653864683905817
CYP716B2	0.653819007124631
At3g03770	0.653766643511021
RPP8	0.653575544719882
XBAT35	0.652815371410413
B34	0.652798758069039
ABCC14	0.652122351732998
HSPRO2	0.651674013328607
RER1A	0.651063838119527
PXMP2	0.649589197785817
CNR8	0.648268380090122
At4g14600	0.647370942500555
SUMO2	0.647353582183623
RABE1C	0.646853332594756
MGD2	0.646745267253963
VPS9A	0.645827912007106
ATL65	0.645789156638547
KAN2	0.645740023619031
CST	0.645398140209449
SCPL48	0.645050869584422
NPF4.3	0.644514518136698
BHLH143	0.644507193721585
CLV2	0.644323496246688
ITN1	0.6442456147902
Os03g0199100	0.644179568279453
lvr	0.643558972012544
BHLH66	0.64349502076631
NIK2	0.643305815231157
METAL1	0.643022475989089
At3g09470	0.642070652083518
Mcu	0.641884012256014
infA	0.641674131701647
WUN1	0.639479728988604
FZR3	0.637894686969915
LECRK82	0.635669792743582
CIPK10	0.635624378601872
At2g19130	0.632272731299072
ahsa	0.631618793726528
tmed10	0.629896922838341
SP1L1	0.62879807153063
OEP163	0.628757376149256
endoub	0.628581733811935
sdh	0.628549906791501
DDB_G0270104	0.627946733672079
At4g27120	0.627224065350366
ERD2	0.627128417140486
At2g24040	0.626736405065573
lip	0.626720902578822
NIK1	0.626528881246138
Herc4	0.623982576314027
PA1024	0.62366249431311
At2g37660	0.623296138533783
At2g45070	0.622782077605099
CHI	0.622525836000939
RAB5	0.622393898534626
REF6	0.621950640652742
At4g00740	0.621247791272974
Ggt1	0.621115162842262
At2g01740	0.620996033960531
ASK8	0.619954348300632
SKIP35	0.61938818699728
SPL7	0.619213794673905
Dnajb4	0.61768331196332
VTC2	0.617572547840334
STAR2	0.617295102264768
PIN7	0.616902585837539
CSLG1	0.615364182364694
MSI4	0.615355068623038
ENO1	0.61510436966048
At4g26220	0.614915962224767
POT6	0.614430982300296
AASS	0.613170893529378
ACT7	0.613099243270867
PFK3	0.611568898115632
SAP6	0.611227827931487
EPSIN2	0.609208756336725
MTPA2	0.608982509159338
GDHB	0.608852094295364
AKT1	0.608096519048495
SPAC3H5.08c	0.607841722428773
SEC11C	0.604353467313222
MSRA5	0.604178918894899
RTNLB22	0.603554715593046
EPFL1	0.603180980238319
BZIP60	0.603058239792807
RAE1	0.602674180396289
gchA	0.60233775148235
STK38L	0.601839134482005
PER73	0.601405766710253
bsdc1	0.600586829695625
RH52	0.599427906469227
MTP5	0.598753081287826
PUB11	0.598101176612891
FAH	0.598015076150858
At1g63430	0.597597971075356
BHLH68	0.597479904620284
ABA3	0.597331295622201
Kif2c	0.597064373307609
PUP3	0.596818289610273
cotA	0.596503165333799
DDB_G0279405	0.596224163105148
mhpC	0.595136354151812
AGD5	0.594940080078963
CML18	0.59291060627017
TPC1A	0.592093623440038
AL1	0.59162818049036
BHLH78	0.590626653996312
HOX32	0.590258876195247
ATPB	0.590074866604873
Os01g0624000	0.588247129548309
NHX2	0.588204595827055
ZIP6	0.587620423016274
MDAR4	0.587490633701708
CLPB1	0.586271771957965
GLR3.6	0.58546169988255
SPAC823.11	0.585248650896556
SBH1	0.585109312703792
RPN12B	0.584702926983871
ercc6l	0.584500856605415
UGE1	0.584123627500736
PAA2	0.583942506913075
SAMDC	0.583760076709157
polC	0.583709228742425
LFG5	0.58346579302154
ASK7	0.582887283595376
DET2	0.582386941669172
At4g03415	0.582367939119391
ACBP3	0.581826372378904
Ext2	0.580657738558822
CS2	0.580605146939662
ASA1	0.580487362527875
SKOR	0.580449145436893
VATE	0.580446005305524
CYP82G1	0.580179654262854
At1g08880	0.578768693217535
SUC2	0.578319182307888
Mvd	0.578132595701372
Os01g0760600	0.578026456085959
RF298	0.577490090745238
MHX	0.576525903988519
At4g09580	0.57499062388743
Ech1	0.574698456703875
At3g28040	0.574318118786476
At2g33220	0.574081316562892
ADH2	0.572733363928757
GSTU17	0.572518756913437
NUDT25	0.571510477201236
CRT3	0.57100400313943
ELOC	0.570178261601748
ubtd1	0.569512495754314
At4g37840	0.569261479025988
GATA12	0.569058275478637
WRKY20	0.56863784895233
At4g00165	0.56857354061399
COG4	0.567797386594759
ASK6	0.567619766344075
acyP	0.567279813012895
GAUT10	0.566814959363264
SPL12	0.566673711566567
HOMT1	0.56627603280801
SAP9	0.565666048742197
PVA11	0.565652120823932
NDH2	0.56542472370469
san	0.564871284988803
Os01g0233000	0.563884214157651
At1g28600	0.56313516110186
AHL	0.56288959240032
Os02g0718900	0.562487390849474
CMDH	0.561152836953108
WRKY33	0.561037882608467
THY-2	0.560256585855504
GATA22	0.560111717689733
At1g67900	0.559394157710925
Bub1b	0.558904122329144
PYL4	0.558828529094524
AIM1	0.558399976306188
PSAP	0.557716781727864
UAF30	0.556387788991412
BEH2	0.555478976796069
ACR4	0.555036777695163
PAP2	0.554785238740738
CBSDUF6	0.554152560889214
DDB_G0272012	0.553137201904314
aspC	0.552666797560065
At2g25790	0.552022748156553
At1g67300	0.551937831515297
Kpnb1	0.551831471283086
ATL43	0.5514071483009
At5g39250	0.550777604835659
STK16	0.55076414874811
vatM	0.550002578062143
MYB308	0.549868550108956
MPK9	0.549416316590354
GALT6	0.548712422836617
yjbI	0.548142142481879
ABCB19	0.547391629705471
At5g48800	0.546519790207178
CIPK19	0.545795712116905
Os04g0179200	0.545708794763745
COX6A	0.54541874289411
ABCG14	0.545139910409082
GSNAP	0.544986507315351
AP2	0.544536557575832
MCTP2	0.544355910189393
AGAP003155	0.543283033387204
DAR1	0.543147120408939
LECRKS2	0.542537081314853
PUB40	0.54198998140464
SUVR4	0.541843966261063
PATL3	0.541540391234727
CYP71D12	0.541037394758385
HERK1	0.540823730518574
plcB	0.540629010148862
NUDT15	0.540511338066795
At2g19790	0.540407460422657
PLL1	0.539438790862613
PAT07	0.539342321292053
THI1-2	0.53911237345679
myoD	0.538975521718141
tmem120	0.538863113188735
SEC15A	0.538583463182245
Tmem87b	0.538317375741018
Rchy1	0.537286088983674
BT1	0.537146397298648
NAT7	0.537099142317262
ibtk	0.536571392003511
JKD	0.536095041864645
Os01g0794400	0.535168718533966
dazap1	0.533824125706999
PPH1	0.533477091213511
CPK19	0.532337303320944
GOS12	0.531752928841862
UBQ9	0.530743635335477
ABCG21	0.530660217417453
At5g04720	0.53038886683407
RPP8L2	0.529370654125584
DDB_G0292028	0.528872901481756
SAPK2	0.528160999324725
FKBP15-1	0.527634910304248
RTNLB13	0.527628764094303
DWA2	0.527466223160576
UDP-GALT1	0.527112653055209
GBF4	0.525711756643174
XGD1	0.525570595793502
KINB3	0.525451581342688
SPPL2B	0.524948015717187
rhp16	0.522661574610799
UGT76E2	0.522488913939854
RABD2A	0.522176024469228
DDB_G0284019	0.521358109906866
APL	0.520530474977557
ROC3	0.520303590093601
SYP132	0.520237053930115
RABF1	0.519865564787507
LPAT2	0.519458351364068
AGO16	0.519251355485794
arcD	0.519039068356369
eng1	0.518893878155871
ATHB-14	0.518731662430076
MSL2	0.51855841162095
At5g55860	0.518077899154678
ATL54	0.516132335361823
At3g15260	0.51599876856203
DEGS1	0.515410037417416
Os10g0113000	0.515271943326994
RABC1	0.514497645133003
UPL4	0.51407915701249
BHLH3	0.512468332600205
FUT13	0.511992770347957
VAMP725	0.511619238329954
At5g28840	0.510606360124952
RHN1	0.510337112429753
VPS25	0.510180831649456
AMI1	0.509306520736901
aps-2	0.509026543236514
DHRS4	0.508584234019667
At2g40140	0.508413572954976
UPTG2	0.50815372779755
Sec13	0.507795950242971
DRP1E	0.507565687471815
PKP2	0.5074135150785
SPS1	0.507230862231859
At2g39750	0.506936976465574
CCX5	0.506797741423874
At2g41900	0.506242530201316
CTR1	0.506217331183042
Os10g0205200	0.505272682596809
GAUT4	0.504948339595209
TDX	0.504653274354635
PCMP-H28	0.503400962919603
TPPJ	0.503192045119216
At1g26850	0.502944385905596
NTF2B	0.502307372047401
TPST	0.502270128797314
NAT2	0.502132219740919
ARF1	0.501973299210882
xynC	0.501600824491695
TRABD	0.500643588379488
MIK1	0.500457340855064
RIN4	0.500207696502508
HPTG1	0.500168815399283
TMCO1	0.499924170251691
Ucp3	0.499611674408619
gpsA	0.499499443930399
FHT	0.499327884028665
SSL11	0.49890531194497
SINAT3	0.498736366245198
HAT5	0.498716423825874
P4ha1	0.498618668127545
Dym	0.498494729854124
NFYC9	0.497970711149081
At2g40280	0.497904875034873
At4g15970	0.497034718407072
mx1	0.496953160743828
HPT1	0.496695821934242
alg7	0.496293744437554
slr0537	0.49479834236116
CYP40	0.494583878930784
PP2C27	0.494053239291829
OPS	0.492749290715896
NAT6	0.492196187985146
FH8	0.491640531026973
SPBC3E7.09	0.491233200228621
GAUT13	0.48945705990056
UBQ10	0.489085793078523
ANT	0.48857571273365
SDH2-2	0.488370143664856
PCYT1B	0.488285305830753
At5g50100	0.488189994074794
wdr45b	0.487175481744721
ATJ6	0.486492677404595
AFB3	0.486207255957133
serinc	0.485776635004432
CHSE	0.48523370604904
PRR95	0.484184897576169
At5g08100	0.484054883128259
SNF2	0.483905852592338
yju2	0.483734603217801
SMO2-2	0.483420717783912
CC-1	0.482529203751029
slc38a6	0.481926736485885
LIP1	0.481084408680211
PME51	0.480775529902437
At3g02290	0.480220912266228
Rca	0.479800083616342
CRK42	0.479397701379561
ATP6V1D	0.479284066984747
SP1L2	0.47880280398555
SYP61	0.478019780087762
Rrm1	0.477481667494897
Tmed10	0.477219089298587
AAP6	0.476742688998067
GS1-1	0.476080245735102
Cyth3	0.475758307653739
TGA1B	0.475682248139495
AL6	0.475465121303042
SODCC	0.4754279902731
LSD1	0.475426291266844
IP5P2	0.474927602399085
PHR2	0.474706560471557
TULP3	0.474452419588173
PAP22	0.474306055728498
MARCHF6	0.474227664197094
ABCC9	0.473916002008401
UGT91A1	0.473603832145015
CAF1-9	0.473294763425199
CPK32	0.473098917501903
VATG1	0.472951800195047
NAC002	0.472010903490089
RHA1A	0.471593588610224
TMEM258	0.471214307784391
mgtA	0.470042140622224
AMT1-3	0.469720601927709
MGRN1	0.469471262703664
RABH1B	0.469070104673215
Pggt1b	0.468901787096976
SWEET1	0.468157078180112
SNRNP25	0.467422973820375
TCP15	0.467205035901614
TGA7	0.467155787600857
FTRC	0.467149849819868
TMEM230	0.465225129181301
HAT22	0.464910949485219
Sec23ip	0.46489243061771
ROCK1	0.464361278351258
ADF2	0.464351463664571
TULP5	0.463966623773459
GTG2	0.463661964564998
FIM1	0.46325992082794
PDV1	0.462835038145641
UBC3	0.462670662549208
arcA	0.4622109123672
DDB_G0271664	0.462149114961136
SCAMP1	0.462126623816563
At1g55000	0.461921945991473
POT11	0.461885044541529
NFY2	0.461369575669836
RTN4IP1	0.461171941015546
ABCC2	0.460776407853349
At2g39960	0.460743878889609
DA1	0.460420033253035
HVA22A	0.459251827231745
VPS20.2	0.458922872969915
CAJ1	0.458478112856187
At3g62260	0.458416646646451
SLC35F1	0.458203196027286
RD19A	0.458098228284219
BETA	0.457013680872603
RABA1F	0.456853555840377
relch	0.456823955138818
PHT2-1	0.456788582581709
R1B-23	0.455801861181671
Sppl3	0.454816523179443
EXPA13	0.454392534354411
ARF	0.453918287483602
Slc25a32	0.45365227981039
CLC-F	0.453603944607071
GOS11	0.452999805292303
VLN1	0.452876164364211
RAD17	0.452607617650474
Pfdn6	0.452208008652392
YIA6	0.451739952074508
Gbp4	0.451690101164338
PTRH2	0.451307133625862
ALIS1	0.45124636017921
UXT3	0.451114967092176
RABC2A	0.451052721611988
AUXI1	0.450651010171701
At4g34215	0.450394715410698
At4g19900	0.45022116800132
Entpd1	0.450189083095893
PRA1A1	0.450183517266024
VSR6	0.44988812252274
WRAP73	0.449233372915664
slr0305	0.448935845427042
UBI4	0.4487558927239
NIFU3	0.448742502986402
BRCA1	0.448693830926332
PBL9	0.448203419176498
msh6	0.447775206688089
phg1a	0.447494710274606
sym-1	0.447372482056517
FLA4	0.447210991120804
WOX8	0.44716890476146
ALDH3F1	0.445376190570172
HPGT2	0.445355938485404
At5g23350	0.445325467052075
XRI1	0.444538359403062
ERF3	0.444353846561641
SPBC1703.11	0.444307165840352
Rbpms2	0.44376622581774
CPK11	0.443161894433816
SEL1L2	0.443038299923626
Dolk	0.442969858719145
SCE1	0.442651486241093
At5g50170	0.442402940176909
At5g35200	0.442332465450405
Os01g0875500	0.441117118816386
PGRL1B	0.441068544849241
SS18	0.440907529231774
RKF3	0.439552941567204
Camkmt	0.439122586390004
LIN	0.438601392104436
arl5	0.438191355568566
Franean1_4929	0.437772139794198
HDA2	0.437630208877868
COG5	0.437587492821074
PNC1	0.437468418730366
ERF1-3	0.437441555880892
Tom1l2	0.437202781320215
At1g01540	0.437110149704352
DNAJB12	0.437028447463179
Trank1	0.436985417509951
HOX10	0.436605435736419
MSH2	0.436117898032076
BHLH77	0.435673119748098
PLT4	0.435654800178289
KEA5	0.435475718515668
PP2C06	0.435118376131842
kif22	0.434980731574082
FUC95A	0.434935793038172
NRAMP5	0.434545995466479
POT8	0.43444489452047
YSL12	0.434440985068126
PTI13	0.433485275888647
phy-2	0.433446261552603
MOB1B	0.433303426033329
lnpk	0.433240605430934
COI1	0.433131873416309
WRKY15	0.432824312908457
At1g01500	0.432543119598607
AGD9	0.432500927336771
CBG06644	0.432402790761365
MBOAT2	0.431851596148844
Rnf25	0.431098986293983
XTH28	0.431097707023509
Ess2	0.430873712897083
PIR	0.430094764952757
SELENOF	0.43008312779546
URM1-2	0.429575799291344
TAP46	0.429205455217432
ADK-B	0.42798108421374
At5g47570	0.427863927602898
FBL8	0.427598313537885
FAD7	0.42655239796713
IDH5	0.425504494538201
MUB1	0.425453515406925
SKIP1	0.425196872547791
At5g07960	0.424305692620104
[truncated: 4,049 more rows]

## Sheet: 380_Cl153vsIcatu
Gene Uniprot ID	log2FC
ATHB-8	9.69954362157994
PER12	9.44930569838811
Os03g0405900	9.15806938589097
MNS2	8.83463477106051
argB	8.48932841930233
ABCA9	8.11173815071271
COMT1	7.70539562195128
Cct8	7.70376840499551
IRT1	7.49418093213969
FAR4	7.28475296268673
cct2	7.21275036997415
BHLH120	7.15424852361217
CBP	7.06501665580062
AAO3	6.99295133605316
MCM7	6.82623427130481
BURP3	6.78931253506434
AC101	6.78824433469637
At2g16710	6.6644667565323
RUB2	6.63861589599737
UGT74F1	6.59654156652151
ppt-1	6.58698525957767
SRR1	6.49230643996507
Tmed2	6.44095305884296
SOT5	6.43275905403017
CLF	6.43157476519337
At1g35710	6.37296283100261
CYP94A1	6.24925107634607
Ank2	6.24534175120383
E2FA	6.18244372120442
BSPA	6.16299358926815
proS	6.15747668588223
GULO	6.11984212777121
rhiE	6.10676932457034
BGLU11	5.95878932899976
ARL2	5.9518432443768
ORG2	5.93449923941938
Os03g0405500	5.83844192154771
DOF5.7	5.79817978512103
DPM1	5.79629285449024
TAT	5.67009504046501
AtMg00910	5.6688159265315
At1g61310	5.5195961805316
AHK5	5.46223479876905
Lto1	5.45096987133935
HCAR	5.34959776205438
At3g08610	5.27347690320624
CYS5	5.25884398221415
LAC14	5.25172747458977
cotA	5.19927317019722
AMT1-2	5.18891239987932
cct-2	5.14256893540322
TRX2	5.0560991519071
SCPL20	5.05295190199047
CRYZ	5.03555461862727
plcB	4.94433507660055
GLUA2	4.93693942178686
POPTRDRAFT_752786	4.81518912442502
FRO2	4.78743611917979
Glyr1	4.76783231865018
CYC02	4.76539073802115
GPAT5	4.74339782676101
RING1A	4.73636416893726
PK1	4.68802841264914
HSP23	4.67367393984327
GES	4.62079249498283
UGPA	4.61805232786789
ABCA11	4.51795615442578
HIPP26	4.49186910339675
RPL13AB	4.45051968012358
IREG2	4.44730712420892
ABCB18	4.37130726200631
HSF30	4.28938581711252
caskin2	4.25828682786958
AG2	4.2197215595736
INV1	4.17722294394049
RPS7	4.10976787154634
At5g39020	4.10912151908762
EPHX2	4.10747364166641
tuf	4.09257403008505
PBS1	3.99262695638778
CYP82G1	3.97944411620163
TPR2	3.96433853194242
At5g39030	3.96373401319734
HOMT1	3.94536538744114
GRXS2	3.90140616946863
CEBPZ	3.77355159003387
AGL62	3.76924971563002
At4g22030	3.75701211736526
Os03g0651800	3.72398194688191
HSP70	3.63317439396069
At5g45510	3.61243705128834
LECRK41	3.60426734665769
CCT8	3.60111835762832
UGT74E2	3.59754574709886
H6H	3.5906422936519
BC1L6	3.57514001187521
U2AF35A	3.56351795380122
GA20OX2	3.55572668532651
GDH1	3.54420544389127
PUP3	3.51319728251056
NPF8.2	3.49349876067399
PCMP-E12	3.47203156704001
PUP21	3.47120843441829
SWEET3	3.46959778534547
LTP4	3.42703629940904
CODM	3.41791248451233
RGA2	3.38888780862169
At1g14600	3.34062791495248
ADR1	3.32980763036957
MIK2	3.3083604410142
Os04g0338000	3.30466662791667
NORK	3.28601574146298
PLT4	3.27606864163154
ACT7	3.21885639756196
MLP31	3.19507816647361
NPF4.3	3.16467099163602
OPR2	3.15824445955387
GLR2.6	3.14654694634941
OTP43	3.10198880037715
HNL	3.09780512055958
GT5	3.08739349688232
XTH32	3.07633924547462
PBL8	3.07042116304844
MYB21	3.05737479587776
CBL9	3.04985829227376
EAS	3.03728400498394
A	3.02310438736139
Cactin	3.01079562551336
ACT-2	3.00345619829484
SAPK3	2.96049232969144
STR17	2.91463895101465
PCMP-H28	2.91443715775825
PXM16	2.88184913587688
RGL2	2.8589632146803
RPL18	2.85747101228605
WAKL11	2.83902961456985
ALY3	2.83092513476832
YLR126C	2.80796622069271
IAMT1	2.80609885047228
PSRP2	2.78029568950296
CYP704C1	2.77150868554944
RSI-1	2.74646902535419
DYT1	2.746209491661
PUR5	2.7451132082158
At3g06240	2.73549586448547
RGA3	2.70660305359144
At4g31790	2.7019588285878
slc38a10	2.69556323047386
CHC1	2.68168235015453
MYB44	2.66691990649514
PER64	2.66676589389172
COX6B-2	2.65090500476106
GT6	2.64402908652488
NPF5.8	2.63831991526965
VTE4	2.63220327026349
PCMP-E91	2.61708250302777
POLQ	2.59300712665001
PHYLLO	2.5881245841061
RNGTT	2.58500589990719
SAMDC	2.58041499561299
NFYB3	2.55351368251404
RPM1	2.55335697320397
At3g03360	2.54834439437308
HMA4	2.54664210661407
Exosc10	2.54204710008618
At4g26340	2.54082327890107
B19.3	2.53502037860797
SWEET3B	2.51803072024531
PR	2.51467473997373
WAK2	2.49968829641633
ASNSD1	2.49384728902991
RCH2	2.49131117478579
Os12g0604600	2.48937057976673
RXW24L	2.4647693083866
BGLU40	2.45914568077973
WRKY72	2.4451951428601
At3g50280	2.40422647053567
Gins4	2.40407694777398
HSP17.5-M	2.39850284233225
HSP83A	2.39477394874304
HIPL2	2.38589984330405
GA20OX1	2.38410426864843
GRXS6	2.34410475414498
ABCC8	2.3392575317862
R1B-12	2.33011298579705
RLK1	2.31806841232181
rrp4	2.31100119735937
At5g22580	2.30137734041575
FTSH6	2.2984678588847
CYP71A26	2.29292708886885
CYCD7-1	2.28082225774063
ERF9	2.27615401254493
DTYMK	2.27322404259063
GCN2	2.26716835264587
GSO2	2.26616048002072
MBF1C	2.25818831574562
CML25	2.24672383277525
CYP78A4	2.2449210610119
WRKY28	2.23366757917392
ACO4	2.22630001399501
PHA	2.22194289997669
LECRK42	2.21885309509036
SEC1A	2.20844235265823
ATPB	2.19814859563408
GEDH1	2.18332718411168
MYBAS1	2.18226999494994
HSFA6b	2.16968671018179
HERC1	2.16594859065805
YSL1	2.16040440744015
HSP21	2.15146157733203
Cog6	2.14955852007074
AOX1	2.14444672895537
TDT	2.12896515305376
oatA	2.12284452534877
PARC	2.12007843451441
R1A	2.11634419934281
NPF2.11	2.10617695707145
PCMP-H70	2.1002583069345
MFT	2.09914632219603
SPAC644.07	2.09585348485345
CBSCBS2	2.09469053660153
APMAP	2.08289791353429
HSP26-A	2.07519365754549
RPS2	2.07359177599988
PMDH1	2.06810892799157
At1g06620	2.06609323029624
At1g02060	2.06410551080859
At5g37990	2.05683010384442
dur3-1	2.05469405848395
PAT03	2.05269714700428
ABR1	2.04382068087099
At5g13200	2.04274377505153
purH	2.03976734865443
CACTIN	2.03192098813759
GT7	2.02995958959818
WNK4	2.02867638047127
UGT73C4	2.02771581014615
Ercc6l2	2.02667261455628
MADS3	2.02361604047419
CKX9	2.01405208919413
san	2.00897810794334
EMG1	2.00718270493877
ACBP4	12.5163264981591
CHIT3	11.8761176188513
htra1	10.8780918235241
GT3	10.0092442409852
AMC3	1.99902254988546
thiO	1.98850622213123
GLP6	1.9861833806999
TFIP11	1.98513779564389
CSLG1	1.98381316945121
hddc2	1.96875297093107
At1g60420	1.96779498436706
HD3A	1.96726486194011
ARF6	1.95377847060386
BAG6	1.9528439478934
ARG7	1.94397161292772
DTX41	1.94312886032469
GER3	1.93630939182766
HGO	1.93379111272444
KCS4	1.93184017009743
UGT88A1	1.92853335755076
2MBCD	1.92089100555117
yjcK	1.9192716664198
At5g15010	1.91828516263382
NPF2.7	1.91070219396987
NEC3	1.90930753786488
co-2	1.90820268857489
ERF114	1.90628509588962
RPPL1	1.89671164686024
BHLH121	1.89267183580844
At1g62590	1.87053846197263
HHT1	1.86942123117469
PDLP2	1.86918121183324
SODCP	1.86883370535782
T85	1.86291203871313
WAK5	1.86164493675083
zswim7	1.85137400256824
Os03g0622100	1.84999229432872
At5g63020	1.84850866844598
CDC48B	1.84531008115946
PCMP-H27	1.8373080402575
DDB_G0282005	1.83612712618465
HB1	1.83567120058706
At5g24760	1.83539268601638
SWEET2A	1.83394197981084
CSLG3	1.82822013866081
AAP8	1.82820088904421
CYP93B1	1.82187406894338
HISN7	1.80925573046861
ACT	1.80232872787132
A622	1.79966642637034
CRF2	1.7991734149643
GSVIVT00023967001	1.79679197505624
POT6	1.79579621722333
CTS2	1.79575685737115
CHX20	1.79038906167253
faeA	1.78863924354134
MIOX1	1.78724021231691
CAX3	1.78474427629928
At1g28590	1.78410557946975
LIS	1.78352867596077
PERK5	1.78236305105248
Os03g0255100	1.77977100181104
SCPL18	1.77734599393576
dscc1	1.77565070624286
XDH1	1.77536963361602
UGT76E1	1.77535292707814
At4g29890	1.77481298827002
nicC	1.77359410576757
pyd2	1.77082049315933
UGT91C1	1.77046374769716
MOCS3-1	1.76862842126457
At3g43660	1.76257941047203
At2g02240	1.76225996140152
AHP4	1.76033457793121
exgA	1.75660483831623
RFS2	1.75546622999081
At5g14450	1.75541948101277
mhkB	1.75499556626606
mph1	1.7532691594183
TOM9-2	1.75299342117915
Tatdn1	1.7527792941781
fadD28	1.75260989329451
AGT3	1.7513723737856
At3g19508	1.7510281385233
GEX2	1.73487877473778
SGS3	1.73146829545844
pat2-k1	1.72922093756363
dnajb6-a	1.72473573991761
At1g05600	1.72358466875481
CEL1	1.71799712084942
ANK3	1.71040233374101
ADCK1	1.7100656328153
ABCA5	1.70670744344675
At5g61400	1.70540049592679
UBQ4	1.69806016692032
CAO	1.67428163450695
PGL1	1.67163495203208
Ehd1	1.66957674778112
Paxip1	1.66782002280909
Tango2	1.66684845570934
PCMP-E96	1.66431555917709
gyaR	1.66268241378167
CKX5	1.65666277745865
SPAC24H6.01c	1.65529597145819
NAC018	1.65064791036849
BP-73	1.64822165553103
RPL19B	1.64647757164679
NUDT1	1.6435703142391
MSRB2	1.64004695337732
CHX3	1.63510535705183
TIPIN	1.63116158889025
Dhx33	1.63060641303453
VSR6	1.62997104658492
Mad2l2	1.62825522911627
speA	1.61742044191881
CXE2	1.60205783865933
TRB3	1.60136312770811
ERF1B	1.60116028132887
CYSK	1.59323111959333
ERF12	1.59318079536683
gins3	1.59305714834775
At1g06800	1.58878220867638
FTSH5	1.58628295413771
Mettl22	1.58527048979901
CLH1	1.58403573807523
CPR1	1.58399417596105
At4g35180	1.58286154303397
PHT4	1.58007019636976
At5g11010	1.57292178983291
ERF113	1.57005882591089
R1A-3	1.56825259525554
CSLB6	1.5628105807865
CPN10	1.55938321782022
TGA7	1.55816229239461
At4g14103	1.55790613576905
HXK2	1.55691485848937
STT7	1.55658188641663
Mcu	1.55483846632981
B34	1.55363689292238
Harbi1	1.55237428075591
RPL17B	1.54364706192437
LOV1	1.54239582731674
At3g07010	1.5402091534013
GN1	1.53646698210956
alaS	1.53380923477516
RPP8L4	1.52603351679477
CNGC4	1.52171973185737
SPAC2F3.16	1.51692304933111
PTI6	1.51661990858395
At3g54980	1.51597460666445
Os09g0533900	1.51518809780273
R1B-13	1.51517241094901
ERCC6L2	1.5113714604252
ZFP3	1.51041975843034
At1g12663	1.50786788986443
At3g10130	1.50492295766574
PCMP-E53	1.50340703153658
POP1	1.50306189406161
UGT71B1	1.49501360035353
DDB_G0268948	1.49328979878757
NFX1	1.49299913766771
FLOT1	1.49108343708751
ACA11	1.4900341989013
At1g60710	1.48419516081319
FAO2	1.48220517585488
DFRA	1.4802335956903
SDN5	1.4787723500911
PIN5	1.47828893041419
At1g72960	1.47747432012704
RAX2	1.47457190183124
CWINV1	1.47370452382658
OPT3	1.47168700167221
DNAJ1	1.47116871505957
PCMP-E47	1.46875548251581
PXMP2	1.46611232996507
HI_0077	1.46557937462536
GA2OX3	1.46516147851693
At4g22990	1.46411484960815
SCPL48	1.45997880441742
slc38a7	1.45414821357966
ycf45	1.44917813689453
SD17	1.44776754575729
EBM	1.44716042202214
CDF2	1.44323410747106
RAP2-11	1.44097301055086
ITIH3	1.4337761311823
RPP8	1.4321267493345
At1g05150	1.43188101685112
VPS2.2	1.43118220168045
nadB	1.43055159313491
GRXC11	1.42976037463357
SCPL50	1.42783466050402
PERK15	1.42669150568354
At5g62370	1.42543110290831
Dnajc2	1.42505747863315
C/VIF1	1.42437642020814
Lancl2	1.4243389528849
MSH3	1.42431111897284
mcm9	1.42169422517039
PCMP-E86	1.4187253703586
Dpys	1.4174438668271
NIT4B	1.41656812193758
FMOGS-OX5	1.40941391524285
UAF30	1.4067875020089
PAP3	1.40516745870987
kif11	1.40171271050215
HST	1.39920291488552
API5	1.39558276532921
ACO3	1.39513563818119
Emg1	1.39501012240346
CAT5	1.38899744084661
STN1	1.38688366038995
PRXIIB	1.38687994043003
NAC021	1.38307281510586
mnmA	1.37812777424344
TCTP	1.37458669245942
At3g58140	1.37317413433088
BMY1	1.372143034864
LIG1	1.36531464470653
TRDMT1	1.361245040995
PCMP-A5	1.36002278095091
At4g10780	1.35829754868059
PIP1-5	1.3566644968058
At2g17140	1.35416876276764
PYRAB06230	1.35219355648244
Mcm8	1.35150145168307
ERF4	1.35055481098097
SKIP1	1.34704066732653
At3g13860	1.34682619886185
CYP71B10	1.34570150216207
BQ2027_MB2253C	1.34116768870023
NAT5	1.34012589866321
Snapc3	1.33827036334202
thrB	1.33795905413233
SAHH1	1.33609643151072
NLP6	1.33536916343907
VAMP724	1.32827662813306
Mtarc2	1.32809534037821
Sec13	1.32806464300412
RBK1	1.32651181522988
HVA22J	1.32377745783341
RECQL4B	1.3237269393246
At1g11303	1.32246396163288
QNS1	1.32067806786609
At5g01110	1.31962410646192
CNGC8	1.31844376510062
Rif1	1.31687258904305
hdhd3	1.31567951898584
GLR3.2	1.31053831380909
Stxbp5	1.30544660001958
At2g19810	1.3032429010573
snrpf	1.30280061288857
BZIP9	1.30151160228449
okr	1.29899598339749
yocS	1.29612100757619
CG7694	1.29566772636238
pgap3	1.29294169408366
At2g38640	1.28558668475416
STR7	1.28209132664991
ALKBH3	1.28189169651876
DCLRE1B	1.27812955644637
RRP12	1.27799961374501
SYN1	1.27770671448745
MXMT1	1.27640712715191
FT1	1.27378495561977
AAP3	1.27302460518428
GA3OX4	1.27075612259046
CAJ1	1.26825027720546
rplL	1.26800128408012
At3g22470	1.26665955797384
RPT2	1.26581959576395
PDC1	1.26356161477438
CIPK9	1.26344397039732
At5g49610	1.26171285215456
PEX12	1.26161318893382
PRR37	1.26109853391613
PCMP-E67	1.26080495238564
CLPB1	1.26006975816604
At4g27290	1.25924743218548
PCMP-H60	1.25621740958408
CXE16	1.25151577985784
MSI2	1.25030670889877
PCMP-E83	1.24813924790098
CYP75B2	1.24575782761794
PCMP-H91	1.24556305881759
PCMP-H33	1.24091784720079
NPF2.6	1.23730132418132
PIR7A	1.23695035702078
NPF5.2	1.23355619384283
TYRAAT1	1.23089499847381
ETR1	1.22977778204044
DXR	1.22881453507399
rpc11	1.22836388861405
RLP12	1.22809519762759
PCMP-E32	1.22583935667129
CYP78A3	1.22543032439102
EHD1	1.22510162802768
FTSH	1.22185024808873
Os01g0813400	1.22136661148987
Os01g0252200	1.22068019087298
STR15	1.22005134516158
At5g55150	1.21917391948663
TIC20-V	1.21797152345571
At1g60690	1.21499973450916
At5g18390	1.21367838229888
DDB_G0272012	1.21144115913887
Os08g0360100	1.21103651110443
ZFP2	1.21067638970832
PCMP-E102	1.20913772281878
SEU	1.20817834316442
CIPK7	1.20477006292402
p20	1.20416997589818
NPY2	1.20033470186099
PHY1	1.19909381340837
At1g62680	1.19847932956099
RPS10C	1.19745097962918
MPK3	1.19542641907445
CAB1C	1.19492862573572
SUS2	1.19227053319802
NHX7	1.18509080031719
FKBP12	1.1807378202281
PSMD10	1.17984619712631
UGT86A1	1.17944058969741
FDX3	1.17864282947705
TPPJ	1.17835865906478
AVT1	1.17751828203389
Smg9	1.17725476441171
SLC47A1	1.17410826417804
SPL12	1.17115139456424
PCMP-E90	1.16967638835926
GS1-1	1.16435691805893
rvb1	1.1640281015377
PCMP-E40	1.16112036017815
At2g17670	1.15521787588389
PIP5K6	1.15255161980385
AGPS1	1.1513163033756
PH1704	1.14914407607451
GLIP1	1.14858233541944
AVT6	1.14819170547343
PIP1-2	1.1458697089891
Mutyh	1.14371766930967
HAG2	1.14040415413961
DMR_02110	1.14035421407693
CYCD6-1	1.13908227997424
ARF7	1.13601464362539
CIP111	1.13065941517135
Smg8	1.12942687713814
SKIP25	1.12933275856847
KING1	1.12930438573995
SPCC1450.15	1.12704676612189
mutS	1.12581210634594
BT3	1.12485298878375
NAC100	1.12359820424999
THT4	1.12225955404612
arcD	1.12193314726981
PTB	1.12002508216362
pc1998	1.11807170582736
PCMP-E27	1.11759569191482
EDA2	1.11479184087186
PCMP-E52	1.11467832271489
UGT75D1	1.11355133171271
MFSD14B	1.11261042807337
Ttll12	1.11119054116102
wdr61	1.11091060296995
dnaJ	1.11047453859972
folD	1.10946999580739
EMB1444	1.10884743987079
rbsK	1.10808942078955
At5g57670	1.10422382597063
GPA1	1.10262170845699
DCL3A	1.10189047047824
PCMP-H32	1.10025111655214
CRK25	1.098987589036
FKBP62	1.09742342053764
NRPD1	1.09685123964907
Dagla	1.09607936903012
Myg1	1.09521240290764
DHRSX	1.0951689161649
SPA3	1.09476812110393
LEA5	1.09371754004537
KU70	1.09056346831399
Mettl17	1.08987356222324
ULK3	1.08953959278564
ABCC14	1.08892300449325
CBL2	1.08811693723145
rpiA	1.08797854565371
At4g27220	1.08795111786603
At1g25240	1.08703869778408
NFYA3	1.08616504447242
NUC	1.08576147039346
ytqB	1.08343695034199
Chd4	1.08276603457914
GT4	1.0822861882688
PUP10	1.08163283217262
RVE3	1.08069758868772
CSTF1	1.07901407159719
mcfW	1.07495868727114
DBR4	1.0746317672765
RGA1	1.0738084533653
pin4	1.07330719778786
At3g58180	1.0718274782902
Poll	1.07164466663783
amaB	1.07090066772089
At1g52740	1.06967836512407
CXE12	1.06884509229425
trmt6	1.06862357818467
At3g63330	1.06741192139607
AAE5	1.06473227343557
At3g18020	1.06395552361771
At5g48730	1.06238804173237
Ambra1	1.06183861605633
NUDT10	1.06107013047083
At3g14460	1.06069452364804
NAC071	1.05892046523052
PR2	1.057685183161
AAH	1.05536600027001
LPD1	1.05491794734637
PERK8	1.05490020997097
At2g17570	1.0540841018727
At5g05130	1.05336495281452
rpa49	1.0526468893331
At3g26430	1.05019483680178
CYSEP	1.04973686177831
DRT101	1.04965554043565
TZF5	1.04952252380192
PNSL1	1.04841218953221
RPL23A	1.04721366378414
RABC2A	1.04690234445564
NFYA2	1.04558062975052
HCF152	1.0437349010688
CES101	1.04073231191704
LSMT-L	1.04006738261714
EMB2758	1.03922933556502
PCMP-H81	1.03403624617623
Cbwd1	1.03402596141451
NAGLU	1.03333485693621
ASHH1	1.03321865685132
GINS2	1.03319093960171
At1g59780	1.03295740322556
allE	1.03260973860582
At1g78910	1.03253721306356
HI_0193	1.03245340272859
TMEM19	1.03224074591248
At5g53970	1.0315836850619
ccmH	1.02997221336671
ATL33	1.02996036210874
At4g01570	1.02814873881206
MGLL	1.0270535986027
Dnajb13	1.0256153558497
At1g73710	1.02271643527946
RAP2-3	1.02259692010161
SECA2	1.02033421342247
CYP71A8	1.01887687620211
psmg2	1.01724872262484
DTX4	1.01643974375206
WAXY	1.01553800790133
vps13F	1.01219428821022
PLT5	1.01138501552293
clua	1.01054096080502
sfc4	1.00986782813606
ara-1	1.00984998749582
nphp3	1.00978482311182
zcrb1	1.00816907126145
UTP20	1.00778107395722
ACA10	1.00679109014809
CSLG2	1.00549863710277
POLE3	1.00464816297891
Bag6	1.00464311636549
Mfsd14b	1.00411373268688
tyrP	1.00364313166009
TTC7B	1.00249873489873
BHLH35	1.00206696277021
UGT85A5	1.00150350876203
OSB1	1.00147044062024
Engase	1.00095761231519
At3g03300	1.000751231724
CPSF160	0.999029330284355
SDH3	0.998427444984401
At1g29970	0.995429101951166
UBQ3	0.994824622043175
ANTR6	0.991741440507523
OEP16	0.991471187179036
MPK4	0.990756831911646
SKIP6	0.990242952788852
SULTR3	0.98875293287694
HSFB3	0.988638599727256
PRXL2C	0.983985665075475
APUM7	0.982440650517716
RFS	0.981833572056876
GRXC2	0.981139035249417
PCMP-H16	0.981121698481464
BH0283	0.978875317592831
Ctsb	0.978517160110311
RPL32A	0.978464689683182
Qtrt2	0.978464448981886
IRX12	0.977230559119582
HAT22	0.974436227757848
SLC35F1	0.970938389843675
At5g42850	0.970845572708214
SPAP11E10.01	0.970315346330348
PCMP-H89	0.968881858537231
At3g28410	0.967516123249949
POLD3	0.965499867114687
Os05g0446300	0.965344507988861
Pyroxd2	0.964006439248649
VPS2.1	0.963798479422012
AMPD	0.963461849733591
VTC2	0.963025657713382
Cnot11	0.962881897919368
SCL15	0.960931601383629
tmem45b	0.960885721782172
CDT1B	0.960114388706317
ZRANB3	0.959153689632232
KU80	0.959104035916738
TOR	0.958544702154316
PHT2-1	0.95822632577228
SlH4	0.957896004624837
AMYC2	0.957400919206797
CCX1	0.953882880996799
At5g06830	0.953318951506834
Ado	0.953025660774666
spoT	0.949902584655259
CYTB5-B	0.94845379981183
BXL5	0.94813386643462
yuxL	0.947893540656405
PDR1	0.94550790274595
EBF1	0.945328556947926
At3g04130	0.94434338060104
slr0992	0.944030087608616
PAP	0.941764689663862
ATJ11	0.941545116406485
At4g18930	0.941239885453621
DRB2	0.941206275917458
Noc4l	0.939946100212405
DHX37	0.939810056896395
ARALYDRAFT_321547	0.939087898565979
TOPBP1	0.938447710311133
COPT2	0.937070658448675
NPF5.7	0.935152963406653
NIFU1	0.935055695228724
SPBPB2B2.05	0.935044078412792
MAD1L1	0.934824833561392
At1g26500	0.933375806284124
ATHB-7	0.932925133179216
PRT1	0.932143918385221
DNAJB6	0.931678204175589
At3g63340	0.930902158398785
slc32a1	0.929825838224554
PUR7	0.92928447146427
At2g30550	0.928966034435305
PCMP-H24	0.925885522593204
RAN3	0.924830376229257
let-413	0.924636845341139
metG	0.924607076855758
PCMP-H59	0.924002807566937
INT1	0.922944782588596
xlnD	0.920869685280727
NPF6.4	0.920613189186256
MAA3	0.918933179295715
At4g11060	0.917176988035216
Vcpkmt	0.912843374553366
purB	0.909836098951968
G6PD4	0.909768231691675
Smg1	0.909584214819312
XMT1	0.908714390405316
At5g27460	0.908107039243862
GUX1	0.908089508750223
HMT-2	0.906672592053321
aroE	0.906603769685252
cisd2-a	0.905901398270758
CCR4	0.903498813825766
ALATS	0.903044937128891
ADF5	0.902184626535254
At5g66631	0.901741196657716
ABCA12	0.901694829260766
DG1	0.901092349289444
sap-49	0.89929057676758
meaf6	0.898412725027813
PMM	0.897101005935957
At1g68190	0.895675577102893
pnp	0.895194754954078
NERD	0.895046050439866
At5g67200	0.894887836545252
HSFA2	0.892438079704266
ADAT2	0.892292847040811
Setmar	0.892066331847294
PERK2	0.892021284529148
PRS2	0.891647773220018
RDR5	0.890968684871791
At2g26790	0.890261856375891
SKOR	0.890195358723701
PCMP-E25	0.889304172294168
KIN14M	0.889177546262484
Esyt3	0.886720347126507
RPL1	0.886094466561431
NHX2	0.8852834870441
AGT1	0.883107022990852
mcfB	0.882301464674851
BHLH19	0.881378730623635
RSL1D1	0.881037835177498
Tmem131l	0.880949463704114
FD	0.880415135760148
ACX3	0.879444156991107
ATJ10	0.879364102100415
NPF5.1	0.878989482323801
lpg1691	0.877519410660087
EMB2217	0.876882369069569
At3g15140	0.876547977497911
At1g22280	0.876511570772831
dmpD	0.872988117390012
DDB_G0270104	0.872561866304588
PGR5	0.872497676912955
HDC	0.872408346928346
RPS31	0.872102088957474
TIP1-1	0.870967747477016
NLP8	0.870252379239363
GLYI-11	0.870035022618625
ECH2	0.869470729320666
FAD3	0.867651535094082
TDC	0.866197879136863
HSFA4A	0.86573669989085
Mfsd14a	0.865103744221984
ccmE	0.864183040964706
mettl23	0.864169002071499
trmB	0.863530649059086
FANCL	0.863483710639717
rsmH	0.862614795572437
UGT76E2	0.861047316801279
APC4	0.860946140310815
ABCB15	0.859218012889533
trmH	0.859138104855223
PME42	0.856856527167791
tag	0.85674724689802
T6ODM	0.856164157332975
Plut_0637	0.854653507902621
PTI12	0.854154866865037
HMA5	0.853945938775169
WDR18	0.853692512265194
Os09g0383400	0.851428985907338
At4g34215	0.851145897950686
DTX46	0.851061647926094
Taf7l	0.849585410255964
UBC24	0.849520250889381
AMI1	0.84873704826474
CHLREDRAFT_128420	0.847990733322744
SPAC57A10.07	0.847942062783609
diexf	0.847246190679551
PDX13	0.843132500338319
SLC25A19	0.842772213221468
NBN	0.842187918085915
GLO3	0.842150024895819
ILL7	0.841926833763717
At5g46100	0.840996788459503
LHY	0.840193734562699
Marchf6	0.840025682313209
qorA	0.837205333509517
YKR070W	0.83702559627278
PPC6-7	0.833876558987418
STR4A	0.833674825647445
PMS2	0.833519559024303
PCMP-E95	0.831028630884218
Os10g0113000	0.830903346593919
RECQL2	0.829003638027083
At2g20760	0.828859576005235
At5g50170	0.828700605773148
hxlB	0.828175531669892
GRXS10	0.828048360602488
TIF3I1	0.826796044626752
DTX42	0.826539500825591
atxn10	0.826349008674461
micu1	0.825535761466769
Slc38a3	0.825247743763175
vip1	0.824963311199632
4CLL5	0.8244646476398
DUSP12	0.823607589314659
CYP10	0.822253557275516
At2g23930	0.821697425423958
At5g17010	0.820710405867553
Xylt1	0.820219564879452
PYR1	0.819742700037753
nt5c3	0.81973146865632
XYLA	0.818809948632519
CMB1	0.817056189778824
GBF1	0.815857462850502
RPS13	0.815693301059028
IMPA1	0.815561948233073
Rnf185	0.815385490084505
At1g56345	0.815023668440541
Os05g0567100	0.814832687687954
SRF3	0.814495269885866
At1g09820	0.814434617803713
XRCC2	0.813877119595874
GID1B	0.811747807858934
RH28	0.811135458651829
gpi3	0.810184429509569
CXE17	0.809831328770764
CXE15	0.809652738148286
PUB14	0.808824303311182
Rfc2	0.808525816489396
IMP1	0.808261130461991
PPR336	0.808173169126419
ATL21A	0.807611255078443
PI4KG5	0.805877351733868
At1g29670	0.805084832315453
XRN3	0.80491430948043
THUMPD1	0.804249388585957
At5g09450	0.803700006090773
At3g13160	0.800638896315153
SPBC1703.11	0.799683053457002
RGI3	0.797756165401772
hemW	0.797731462525112
At4g04670	0.797287741823547
KIC	0.796952523795216
ETFB	0.796761681237657
SODCC2	0.796727547371413
NCS6	0.796598603828438
lpdA	0.796583196000262
DOT3	0.796271614025577
At2g30780	0.795711944706911
SRRM1	0.794461323864148
pcnB	0.794016954666083
At4g18975	0.79252306584865
GYRB	0.791383165367457
Mrpl47	0.790851515933084
SPL8	0.789016188187642
SODB	0.788319555251134
sotv	0.788219010424478
polC	0.787260217325824
TIMM17B	0.787038631812483
RH10	0.786310512910913
Ganab	0.784694168370282
EMB2752	0.784602718587725
RPS17	0.784242702076128
GRXC13	0.784089975623826
KAT1	0.783901911112683
NUDT19	0.782685574002142
BBR	0.781168285697435
ERF053	0.779620263369221
MPK9	0.778884430656734
COL2	0.778182836956185
CTC1	0.778056784180859
ACA8	0.776808135087332
EMB2745	0.776217750096657
RBCMT	0.776101288873017
GAUT11	0.775818864005366
XCP1	0.775815445622556
At3g59230	0.775232466271398
FAO1	0.774177469027804
Rf1	0.773795121760814
RPOT1-TOM	0.773283070897943
CGS1	0.772734986816094
PCMP-H74	0.772518826072311
bipA	0.771221320791163
CYCP3-1	0.770587133834508
ucpA	0.770578548957868
Aatf	0.770296196966247
PRMT3	0.769774676443243
AP3BA	0.769193829376175
SAT5	0.769025573861367
PP2A1	0.768763298755335
CCA1	0.76868646122389
ABCC10	0.767637151117685
DRAP1	0.76697801775789
EMB2744	0.766884900110925
TIP4-1	0.766145253697508
ABCC4	0.764773320107208
WAKL20	0.764428364069281
VITISV_013255	0.763643264955823
PP7	0.761913110945019
DYW9	0.761775036183232
txlA	0.76176091681449
MDAR4	0.760842048602473
PDX1	0.759459479786339
fcf2	0.759358324075304
FKBP19	0.759319969151856
kdgA	0.7581966840096
At2g24040	0.75817331969961
DDB_G0268158	0.75698015791507
PIGA	0.75696184472582
U2B	0.754767249455933
MJ0044	0.754536733918645
TBXAS1	0.754117936183203
ELP6	0.753687661802574
HSC80	0.751246510808489
TIFY6A	0.751041209392776
rad54l2	0.750699899860468
CDS1	0.750098290208651
ABCB26	0.749531526960607
At1g05030	0.746942803869057
ARA1	0.746094461129661
NIFS1	0.745189209709859
ALDH2C4	0.744901603644808
TTC1	0.743740441110973
AKT2	0.742542501808451
ykwC	0.742322180208834
utp20	0.742262048814827
dtdA	0.74105106760953
PCMP-H35	0.740904671941349
HMGB7	0.740755092795326
PCMP-E23	0.740175832259971
PCMP-H34	0.739722525291769
IPT9	0.738824452117638
ABA2	0.738409607117022
CYP37	0.737587631795418
SCL14	0.737489755230669
ZC3HC1	0.737189232207144
GGAT1	0.736435131827806
AAE7	0.735650286859757
APS2	0.735489493123149
steT	0.734630673541178
SYP22	0.734529308369877
Eif2d	0.734303122219206
CNOT11	0.733074699322412
Dmtf1	0.73274984222134
BHLH112	0.731408211597412
PMSR	0.731228630990635
HISN2	0.731052738039639
At4g34730	0.728876169075462
SPBC16E9.10c	0.728858324615198
PAP2	0.728564663002534
ADH2	0.728290911458087
At5g56900	0.727347236189806
ARF19	0.726872111740563
At5g14080	0.724603798227658
SS1	0.723208020595557
PP2B15	0.723069717118712
IMDH1	0.723011194751234
BAT2	0.722737467640414
PCMP-E73	0.721792482441606
CAT1	0.721445021360318
Mtg1	0.721218672919027
At5g47540	0.719687654481502
CYP81D1	0.719312360802549
GRP	0.718022664266489
Os01g0233000	0.717783607596878
DEGP14	0.717529462705889
At1g80170	0.717462063752061
RBP47B	0.71712177009714
HIS2A	0.716857096362795
MAGO	0.716706636492433
AS1	0.716633715287646
PCMP-E69	0.716530468953442
NUDT2	0.716069238612967
IMDH2	0.715952510159079
RH58	0.714517856159003
B120	0.714457319287317
DGAT1	0.714264191418377
VPS26C	0.713489294957774
GLR2.2	0.712581537534477
rbgA	0.711611021993367
EDRF1	0.710390411782917
ATP23	0.710315226010557
drkC	0.70992048686387
At2g30020	0.70955209271324
setd1b	0.709544308505854
MSL2	0.709232555123775
SERINC3	0.709007275564808
Nolc1	0.709001320112291
PCMP-H77	0.708331131173568
GH3.17	0.707657157397654
SPA2	0.707582990979987
PUS3	0.707121598857805
PDC2	0.706670710784272
FHT	0.705180627238884
tsf	0.704441292886816
ULT1	0.703330759488947
ynbB	0.70324898880153
RH35	0.702992405769697
CYP71D12	0.702971732579237
RPL15A	0.702962424633751
At1g51550	0.702868094379198
Os02g0636300	0.702551291506979
CPN60-2	0.701159937197877
SPL4	0.700032712102057
SPS1	0.699196569341587
znf511	0.698550595207243
CS4	0.698316935619389
nol10	0.698169040796815
CAX1	0.69701998063586
tlcd4-b	0.697014622464713
FRI	0.6950953709643
GAD1	0.693947632165742
NHLRC2	0.692941000081259
Bub1b	0.691519937460006
PAP8	0.691123307227757
SAP9	0.690705524539066
METAL1	0.690155196743815
TAF12	0.689997995064091
At1g61340	0.68927215666458
VDE1	0.688256867892645
CSN4	0.686618767584091
At1g33170	0.686226936269452
BBX24	0.684952894360063
ARF18	0.684579113963272
TYRAAT2	0.684528208892382
Tmem97	0.683930617753491
PLPBP	0.683744227013125
ARR4	0.683349068089948
BGLU12	0.680692470791383
EEF2KMT	0.679448178621864
E4	0.677692701818016
DDB_G0269284	0.676961219213488
AGD5	0.676734779275632
ARI8	0.676078116549268
PCMP-H12	0.675937803400364
glpQ	0.675555307361747
slr0537	0.674490363131026
At4g28440	0.674243297445828
ARPC4	0.674228606877623
ERF011	0.672658938632183
Api5	0.671965666886684
TENT4B	0.671942456171274
P2	0.671771373831978
At5g47800	0.671100016809371
GPX4	0.670109591968766
trpB2	0.669530341450061
At1g71810	0.669152410947508
DAT	0.667178509983879
FBXL14	0.666916634733885
HPTG1	0.66686090939733
At5g35930	0.666437685736861
ATL43	0.665518956910696
PCMP-E42	0.665185245725147
LACS9	0.664934714525341
CBSDUF1	0.663539790189881
MTK	0.662616430429819
Set	0.662159525439078
TYW1	0.661956288900018
faf2-b	0.661718002493656
Fggy	0.661386371798808
murE	0.661237133808231
At1g53430	0.660979575307262
KELP	0.660694644193552
CFDP1	0.66060977405149
rio2	0.660019475262963
At1g74260	0.658993750651578
purU	0.658103376372929
RD19A	0.658071080947574
AGT2	0.65770802887278
At5g58620	0.657445625653237
SCRM	0.656465753212961
v1g169424	0.655941792686448
EXOSC8	0.655586661728745
At1g76050	0.655491457850587
EMB1687	0.655265873196525
SPAC1A6.10	0.655107176689751
MBD8	0.654300865726309
Os01g0705100	0.652982208055485
ppi	0.652856854924397
Os03g0728800	0.65269879861948
prmC	0.652497465982972
cse1l	0.652488283343105
SPAC22A12.08c	0.652333052528913
HSF24	0.652255195706894
CLC-C	0.652177481317671
PCMP-E14	0.650646227894209
GAPC	0.650533614734323
CAF17	0.650263262276154
At5g40400	0.650052947203053
MIMI_L728	0.649659012307592
SOX	0.649276414653575
At3g06920	0.649048544213482
ARF15	0.648963138710569
Lpin3	0.648722817092756
MRS2-4	0.648491579997915
ADF11	0.647877659126868
MRS2-2	0.647168830250658
At1g19290	0.646552467701066
DDB_G0283291	0.646200191270574
SERK2	0.646012583969744
SPAC4A8.10	0.645899878412531
menH	0.645642527928378
RRN3	0.645550122433057
PAT1	0.6451202375052
DCUN1D2	0.644658430885096
DUS2	0.642707198902913
DDB_G0281937	0.642659750381368
PER25	0.642350652140139
CBK1	0.642004837226009
prp-8	0.641989002342314
TEX10	0.641340000408061
Os07g0631100	0.640771581162346
STR1	0.639250211229156
GRXS7	0.638085056477356
MNS1	0.637946854589434
TMCO4	0.637726105797809
DXMT1	0.637555217135631
SKIP31	0.636896020562049
AHP1	0.636248905064112
SRSF2	0.635723228343167
polr3a	0.635594188354414
RH42	0.634951826732464
med22	0.634769349621613
VSR2	0.634718553920535
fdh	0.634501996943585
kif4	0.634126587381979
EMB8	0.633951912689198
DDB_G0279223	0.633920292223641
HAT4	0.633875855952745
PEX4	0.633075126722007
Mterf3	0.632693848474049
ucpC	0.630469470416318
rsmB	0.629951950812173
ILL1	0.629414311992702
PUB62	0.627859752335671
MSTO1	0.62617303804951
DHX35	0.625879145499595
smkA	0.625709313779249
rhmA	0.625624850994026
SUVH2	0.625403797308646
Nup98	0.625150320120069
ttc33	0.624738661185235
Exd1	0.624687466248367
GDHA	0.624342724564897
CNX3	0.623733475982948
UTR2	0.623144803039556
Pcbp3	0.62206962807145
APK1	0.621437833393243
APRR7	0.621413262796992
FAM210B	0.621381262735494
At5g55050	0.62108885963995
PCMP-H88	0.620501772045583
TRM112B	0.620485009575888
ATL2	0.620105079810951
DI19-3	0.619701519063174
SLAH3	0.619240242392777
BQ2027_MB2734	0.618854937020879
VBF	0.618796655893709
DEGP9	0.618540617025751
HPT1	0.618526168605784
ESF2	0.617233525097473
POLR2I	0.615797421931273
YUC10	0.615776545401226
PIGU	0.61566399828756
ALG12	0.615377690230862
AAEL006251	0.615234801449602
At2g23950	0.614766446704738
gtf2b	0.614649699554597
HACD2	0.614592785795719
pip	0.613886122041901
LOX2.1	0.613009619596698
EMB2654	0.612876237778732
MOS2	0.612230782496426
OFUT1	0.611461595403959
PAP18	0.610605121958028
JMJD7	0.610433045616851
PRL1	0.610203684259643
MCCB	0.610105750864183
tsr1	0.609857380447791
PATL4	0.609598106574906
GGH2	0.609257457137502
FH8	0.609182009279307
At1g08700	0.60865579458138
SODCC	0.608361904256992
ABCC2	0.608267409092758
ANT	0.608015396840287
NAC029	0.607474543387469
HSP22	0.607359966705453
At4g08455	0.60663499798781
Csac_1776	0.606120877664505
TRAPPC13	0.605999016878404
DEG15	0.605924927212051
At1g62350	0.605601684261066
PTI1	0.604360098126883
ttc38	0.604053646079018
sf3b1	0.603950228722836
ABCF1	0.603189880806228
CCD4	0.603009183462103
DDB_G0274487	0.602690310082334
RAR1	0.602564349644762
MTREX	0.602261652573686
SMG8	0.601223367600619
GLR3.4	0.600572082897191
ZIFL1	0.599811070174799
POT1B	0.59818776434515
At1g13630	0.598100541538667
BHLH123	0.597517619129636
SYM1	0.59713036884569
ORP4C	0.595291041689511
Spout1	0.595233856521005
Ccs	0.594599530424805
OPT4	0.59442368349814
crls-1	0.594398969150876
ATG10	0.594311183645197
SYN2	0.592974388844325
BADH4	0.592527473676331
arsB	0.592451278611503
ytfP	0.591686053917692
TXNL4B	0.590236217326203
tilS	0.589929458618703
fhit	0.589703180872808
Os01g0851400	0.58924299475919
At3g14580	0.589152683722339
Samm50	0.589143913626839
CERK	0.588771448160686
PP2C38	0.587854227716022
Thoc3	0.587831364187571
HSL2	0.587190884513953
AGD2	0.58643789220924
cox17	0.585724538551879
YPQ1	0.585199917435479
COX15	0.58495478704709
tipC	0.583892929250199
neur	0.583682421645328
gluA	0.583397951478947
DGK1	0.583130159703336
At4g21880	0.581629315701557
GAL1	0.581520239991337
mfd	0.581329470937678
PCMP-E19	0.581216508639699
MUB4	0.580184045403156
WDR11	0.580011236477859
At5g22730	0.579829530669035
At1g05670	0.579294303950381
MCTP1	0.578317981325439
SAPK1	0.577549152864777
NUP85	0.577342293448932
Ogt	0.577224590923414
PGAAIR	0.57700313072581
S6PDH	0.576987577569155
At2g39795	0.575566963662341
SEN1	0.575378901964907
pno1	0.574788173021464
NUDT8	0.574648152003621
PCMP-H64	0.574430279014487
RAE1	0.574354175148067
prfB	0.573408509129188
rabepk	0.573119809831054
At1g02370	0.573113416426414
ATM	0.573077192274319
ttc4	0.572972510533336
At5g54890	0.572762748257449
CLPP2	0.57224847102093
AHL	0.572192457037328
Dhx36	0.57190075585635
FKBP17-1	0.57145266379418
SPATA20	0.571213009579225
IAA26	0.570976432379813
CPK11	0.570247787880236
ITPK2	0.570104750916124
HUA1	0.569645064466562
smc3	0.569568535008183
sacm1l	0.568131109648714
DCL3	0.567744307687644
RD21A	0.567200187079968
At5g12100	0.56685624508338
SAMS2	0.56684431047735
Ik	0.566580066424262
CBWD2	0.566516206047797
mrnC	0.566513706079824
tif225	0.566510944629577
FRK2	0.566310522480277
MMS21	0.565959833358244
NT5C2	0.564742375152771
Wdr89	0.564477855740997
ATPAF2	0.563998915283824
fam135b	0.563339424387983
MCRS1	0.563200914568309
At2g28370	0.562934537094418
trm1	0.561860709026819
thiD	0.561007346281776
cefD	0.560229279517047
At1g67325	0.559424305827709
PDAT1	0.559194363376392
At3g63550	0.558696681275405
EMB976	0.558452097713737
RKF3	0.557930413942118
LYPLA2	0.55695349722022
WDR6	0.556470402287699
GTE4	0.556151789226628
GPN2	0.556067236163096
Hnrnpab	0.555469247466813
RCOM_0530710	0.554958500517984
At2g27500	0.554761288343838
WRKY57	0.554704662002783
POLR1C	0.5544422796316
iolG	0.554314376571919
GRP2	0.554284250230236
DDB_G0284757	0.553428455921618
At3g21360	0.552920867542255
POLL	0.552680577990444
EFTS	0.552464974479176
UBP6	0.551993523963999
IQD32	0.551382985536963
At1g11050	0.551028615646575
ALDH7B4	0.550945191727488
UNE10	0.550540148393998
Coq8a	0.549803093370433
At1g22800	0.548893826217891
MSL8	0.548566244936079
cpr2	0.547852931949701
CLPB3	0.547801793115521
guaA	0.547670851202055
CLPB4	0.54717255730359
GIP1	0.547016444125611
At2g41900	0.546928171539421
HOP1	0.546847459565585
At2g40090	0.546738255096222
Rnf14	0.545950445235606
UPL2	0.545458809728788
GN	0.544296109533756
ABHD6	0.544191069036466
At3g10140	0.544171952516167
At1g55000	0.544036030500198
PPD2	0.543800727369244
CLPT2	0.541969820529627
SKIP30	0.541889096710457
CYP707A1	0.541532861703025
GAI	0.541422060323014
SPP1	0.541195314809823
At1g71210	0.540723456714758
NUDT26	0.540652023024574
CDCA7L	0.540571628782559
MKK1	0.540548492626391
Os02g0672600	0.540541039263583
SUPT6H	0.540214844686128
PARP2	0.540134884106034
VIT_01s0010g01180	0.540050064024022
DRG2	0.539492947091835
vmp1	0.53865852658808
ALG9	0.538305033043238
DBP2	0.538275867550505
CTSB	0.537760159238631
ptges2	0.537130235325687
SPA4	0.536582384645537
OXI1	0.535892247008173
OEP24	0.535738968991788
Prpf40a	0.534507558276068
NDH2	0.534319476056287
LPAT5	0.534212595091507
At5g06550	0.533687340026368
At1g51745	0.533086813993243
ERG3	0.532980443825117
rmnd5a	0.532605418612355
PSY1R	0.5323678893153
slr1419	0.532220476181993
ARP7	0.532059456290721
RAP2-13	0.53161641115493
Txnl4a	0.531205446992635
Ifi30	0.530370772219249
At5g15280	0.529930884960398
fex2	0.52990121405304
PEX11-4	0.529374865828892
CIPK6	0.529127850021443
GOS2	0.528799142513627
rpmA	0.528588237000388
aifA	0.528448682644742
ERD2	0.527604715575206
ATL48	0.527451598358502
DET2	0.527133277963344
DBR1	0.526828457057448
CIPK10	0.526263427432099
CPN60A2	0.526256995152563
At1g09680	0.526248291282466
VPS13C	0.526066591729839
Rfk	0.525984063175352
SULTR4	0.525626917650705
Ubxn1	0.525596112922634
PAP28	0.525554545095546
TRANS11	0.525472470909018
ATHB-6	0.525416928458202
PRPF40A	0.524727376923829
AMY1.1	0.523899934057447
CLC-G	0.521780528003733
CHX18	0.521566907397351
HO2	0.521399906339022
WRKY11	0.521162471866969
pyurf	0.520991760254696
Endov	0.520902409856646
MARF1	0.519755187990429
SPBP16F5.05c	0.519633633664526
AK1	0.519440183836452
mrpl58	0.518591828397655
RCOM_0711420	0.518117987752707
At1g17350	0.518016100125218
At4g21705	0.516723833521905
PCMP-H61	0.515921258894902
mcd4	0.515105451347335
AG118	0.515006300003624
MRPL46	0.514706256674702
FKBP65	0.514680868803455
rplT	0.513897730334127
WRKY20	0.51242947149277
At5g03905	0.512292634321338
ctps	0.512031234496377
nep1	0.511110953107495
RPOT2	0.511089147603342
Msed_2001	0.510724668126792
ampp	0.510381340552887
ERCC1	0.508947065931761
At1g04390	0.508819388212747
DHS2	0.508813057065829
UBP13	0.508495112695807
TIC20-II	0.508050758958429
DTWD2	0.507996888305614
HI_0488	0.507882266536699
FLACCA	0.507274655607208
MORF8	0.507231785084264
At1g01500	0.505956508211927
SE2	0.505816240105882
HSP70-15	0.505514770835334
At5g49945	0.504689428100776
rpsK	0.503674135421169
NSP5	0.503517284601315
PPP2R3C	0.503008846685937
MAN2B1	0.502739367899252
LPCAT	0.502304756727107
Dnlz	0.501962683835978
nmd3	0.501951738314407
XPB1	0.501364971121831
Os01g0270100	0.501301690256096
TUBG1	0.501290996879391
LCA1	0.500983977646669
RPL3	0.500652177555106
nbas	0.500580488758536
xynC	0.499901490853698
CA1	0.499694611472594
RH18	0.499670560179928
Lsm7	0.499547801248911
APX1	0.499276374655888
At1g08370	0.499213788561709
RBX1A	0.499181600043693
GATA24	0.498896934098117
leuS	0.498817604952099
Ppwd1	0.498532981260596
Ssuh2	0.497989486184914
CKB4	0.49750523546162
Prpf4b	0.497377121118954
DMI1	0.497374458134885
CHLREDRAFT_206018	0.497261275753483
KIN10	0.496799453223423
At2g32630	0.496763275070682
VIT_19s0014g02480	0.496684579279353
PAP1	0.496643924898064
DGD1	0.496034138406872
FLU	0.495880485550987
ADARB2	0.495731212730082
CITRX	0.49448361872646
RPL35	0.494169715402892
At5g07610	0.494039437223312
TLP1	0.493887654795232
At3g03070	0.493244416656504
LPL1	0.493158800749843
FBA2	0.492863129538614
UBP22	0.492824476366532
WRKY2	0.492765070653883
PAP15	0.492655511807577
BGAL17	0.492594706946875
ERG1	0.491748279586663
dagK	0.491201007940423
SLAC1	0.490380030664929
dhbB	0.489778461138986
UBC26	0.489374142444508
UNE12	0.489038860403467
OBF1	0.488818723933331
SBE1	0.488096033503142
METTL7A	0.48673649801068
tmem205	0.486467583237883
lsg1	0.486453294329265
ECPAS	0.486170130768717
YNL011C	0.485362280042859
PPA6	0.484957031307765
EIL3	0.484851799308572
Os10g0513300	0.484350289887043
gemin2	0.484111486656915
At5g57250	0.483571611207789
NAA60	0.483175318740278
At1g48510	0.483127811088219
rplD	0.482788457395051
CPT1	0.481809500990812
At5g47360	0.481525768284829
EX1	0.480640226035262
NUP98	0.480087553456401
DNAJC13	0.479851905136462
CDKC-1	0.479708944988754
BIG	0.479565797703909
At5g59530	0.479449618017276
v1g238856	0.479173409366652
drg1	0.479020498795801
Adat3	0.478327990106626
CYP40	0.477971284625925
cdsA	0.477917732012233
ARMC6	0.477355844021618
TOC75	0.477280094599294
CRN	0.476844956223974
At1g61180	0.47671799942733
PNM1	0.476218250551956
abkC	0.475302162448264
BRAFLDRAFT_104103	0.475129339658654
GT-1	0.474778073400462
IKU2	0.474717152287115
PVA42	0.474516970447973
KEG	0.474507926589734
FACE1	0.474383573902287
PUB36	0.474269815463376
SCPL49	0.474188082713121
At2g17033	0.473561758807106
ACS	0.473434621961657
EYA4	0.472934870789476
sf3a2	0.472718020353342
At1g14450	0.472569021485367
AGO3	0.472357283184788
SKIP23	0.472345362152598
RPL31	0.471818259862306
LPXC4	0.471021047792089
METTL21A	0.470330947426759
GATA26	0.470193781390648
TMCO1	0.470177789014101
rnf217	0.470139442870255
MSBP2	0.469641062197197
At1g17710	0.468877338043024
CPN20	0.468571942377709
At5g14170	0.468521192118888
tfg2	0.467861589827263
SMC3	0.467838405914794
ltaA	0.467824031094093
NUDC	0.467369601789425
ybeY	0.467119579193541
PCMP-H85	0.467023000574698
SPMS	0.466981242484239
PGM1	0.466947343794793
SPAC3F10.06c	0.466701725648854
At3g19330	0.466377155434863
NUDT3	0.466314613662003
At3g22480	0.465305417782377
TRX9	0.465151556378308
CDC48	0.465075882393073
Zadh2	0.464711851668161
ASPSCR1	0.464252221088247
GDCSP	0.464098940058974
Rab5if	0.463875600103456
SLC25A44	0.463036372495381
PIS2	0.461621609678799
CRY1	0.461445933616871
At5g39980	0.46074741960437
Smyd4	0.460363545420022
ARC5	0.460297858670569
yjbQ	0.460099405677813
SPBC651.09c	0.459973997691526
KRP3	0.459511221766711
U2AF35B	0.459297944435269
LECRKS4	0.459066176426425
TBC1D9	0.458977868669558
rplY	0.45884107873793
HLCS	0.458285778847177
ycf52	0.457920223611679
CHUP1	0.457559294412647
adrm1	0.456989714361226
ATPK2	0.456881949676805
SDR1	0.456743021071139
RH57	0.456620156632665
GTE10	0.455978767568094
MBOAT2	0.455900206993836
yod1	0.455874970953462
AIG2A	0.455816267682463
BRF1	0.455672349400367
Wrnip1	0.455399596595376
polr1d	0.454976087983965
EMB1270	0.454307946623973
WDR74	0.453995192283307
Sde2	0.45368208258822
BHLH137	0.451792126994253
pepN	0.451781781243701
eef1akmt1	0.451482332986194
At3g03920	0.450352046348425
SPT16	0.449403060415019
BIM2	0.449372375197211
RPL3B	0.448347982956037
NFS2	0.448175886445599
FPGS1	0.44785400552449
HDA19	0.447681923152534
SEL1L	0.447616042744681
U2AF65A	0.447323799059584
At1g67720	0.446093859210549
TMEM184A	0.445999419882759
DRT111	0.44599280988424
NPF5.10	0.445831333815725
ARGF	0.445757207462382
CSLE1	0.445370885456003
At1g75140	0.444690549024304
At1g63080	0.443619442765978
RPL10	0.442940869157604
At3g47200	0.442799048505611
ACS12	0.442357649045178
ANS	0.441655669407899
At2g45640	0.440308441449685
Wdr53	0.440168370007964
PURA	0.440146500510678
PCR10	0.440089179170509
Xpo4	0.438737996355407
LUC7L3	0.4383844452309
ISA2	0.438326741199969
EFL4	0.438109792981109
BMS1	0.438006405003257
STOP1	0.437154278351641
UBC36	0.437065233221175
PMA4	0.436506553738406
rpsA	0.436395737099148
FLS	0.435932549134392
ycf20	0.435847358629716
UBC28	0.43532283057781
CSN8	0.435183164386398
ATL46	0.435100388873389
DSP4	0.435052202096707
SR34	0.434678960100586
CPK28	0.434477232542072
RPL7AB	0.43436316076299
NCED1	0.433550923327619
PLEKHA8	0.433489121867427
PEX13	0.433177118683564
ABCB28	0.432765972708506
OXP1	0.432741303258734
PSD	0.431411686562864
Lonrf3	0.431331911444474
PPC6-1	0.431184645326074
CKL1	0.431109740294816
THADA	0.430858038862225
DRC3	0.430820725621683
PRMT10	0.430456727636048
pho2	0.429961304879259
fdxB	0.429161591537953
ZOG1	0.428961213852686
CAT2	0.42881102745355
COI1	0.428659169936348
PFKFB1	0.428636333135464
Nop2	0.427712730526598
At4g06598	0.427627262970312
Taf2	0.427482784650393
CYTB5-E	0.427073807284806
PFP-ALPHA	0.42631750074381
APO4	0.425871880584639
RPL4D	0.425484728080807
aco	0.425366279836869
RABF1	0.425085927440639
UBC10	0.424629460760363
ZBP14	0.42401673524874
CYP716B2	0.423973813203971
NHX6	0.423865598126024
CRP1	0.423674794647401
rsmI	0.423279527348034
RTNLB1	0.422726166230956
CPSF73-I	0.422598895543332
AAP6	0.422406378268011
DFR	0.42111301111757
Nub1	0.418781608132918
TIC110	0.418730543773796
RNF10	0.418627128650717
ZFWD1	0.418531506767359
KAB1	0.418374585013254
BGLU41	0.418269051186255
At5g09310	0.417488156321276
CLC-B	0.417425132738739
CPRF2	0.417408002061746
UKL1	0.417369041222953
prfA	0.416966519857615
GLX2-4	0.416883216429105
Os03g0586800	0.416804391182237
CYP89A2	0.416794560010149
GTF3A	0.416745218619858
At5g64816	0.416690793479763
Utp20	0.41644782498129
apgM1	0.416293262500516
LBD38	0.416282965031104
PARA	0.416230265608801
argG	0.416147757493137
tmem120	0.415799106832194
At4g06744	0.415626591236732
taf6	0.415585714704083
GTF2H4	0.414898985084071
gus1	0.414873753248632
exosc6	0.414849611498918
CAD	0.414733755153722
CESA9	0.414629849281673
POPTRDRAFT_833824	0.41456926977303
OEP61	0.41442137992622
ABC1K1	0.414328169127382
R3hcc1l	0.414199626352597
nca2	0.414186529997095
PED1	0.413981536507908
ARID2	0.41398142130547
Ess2	0.413224380790058
pabAB	0.413188022723685
PIX7	0.412832856357206
TWN2	0.412636471572701
DET1	0.412482704032325
SPAC56F8.03	0.412292720358542
SBP1	0.412194171030553
pdxH	0.412184190666865
COX11	0.41176337251795
Rbp6	0.411230101900859
TIC20-I	0.41080187217252
PALD1	0.410499510907905
ileS	0.410460869637164
SUVR2	0.41035199359581
RPL9	0.409770774539364
ISPH	0.409457727418465
IGHMBP2	0.409436334256862
KINUB	0.408811021038337
ALMT9	0.40859333526476
At5g18475	0.408588567891786
BPC4	0.40855572358707
SKIP16	0.407818303278038
LAS21	0.407802396522492
TOP6A	0.407554068553013
Dnajc16	0.407251561947209
larp7	0.407235681079934
NAT3	0.407211706675132
METAP2	0.406668751515385
At1g13570	0.40663912879178
GATA28	0.406399174619269
HRQ1	0.406322696712833
vac14	0.406133627251018
FTSH4	0.406122271688305
dennd5b	0.405621077269546
jmjd4	0.404934600378004
DSP1	0.404897960207849
21D7	0.404739532026856
CCD1	0.404545691291797
NUP93A	0.40435460441246
fusA1	0.404338984535803
ncdn	0.404332076716441
COL13	0.404051713009657
BAG4	0.403968708526457
Fig4	0.403874506274103
Ciao3	0.40380308370714
MKP1	0.403724940962819
CIGR1	0.402621578713406
TAF8	0.402515620135794
WRKY69	0.401799474642478
IMK3	0.401576594825483
rpf1	0.401400653451101
At1g28150	0.401182987772259
ARP9	0.400903519294309
SUC4	0.40082196171626
acyP	0.400645365609089
NPHP3	0.399361471769686
Tom1	0.399305969555094
RPL34	0.398848820333217
FES1	0.398711579266226
Fbxl2	0.39863535473469
PBL5	0.398604238198951
AAMP	0.398425488666939
RH8	0.398416156524871
papA	0.398124882215982
At3g47420	0.397846733275908
A1CF	0.397654567266148
BARD1	0.39739870035711
Ergic3	0.3972857847084
SUPV3L1	0.397142900773703
HB2	0.397108214340437
CS2	0.39696399214951
ABCI20	0.396871044925502
CBWD1	0.396738948987611
RPS3C	0.396680447245266
snf21	0.396662760406431
BHLH66	0.396326350215388
AGD8	0.396057455868296
ATX2	0.395520782851879
ANTR4	0.395474068071583
WDR43	0.395452750641943
ACA1	0.395403105731452
P2A12	0.3953834293047
RH41	0.394984003338759
DDB_G0284253	0.394270706357045
ZNHIT6	0.394008894367491
RABGGTB	0.393526185759319
DBP3	0.393262258324879
spp27	0.393128598253307
Slc25a11	0.392819229916067
gluP	0.392194256940954
ILL4	0.391504699713336
TAZ	0.391486464906421
At1g75280	0.391410467100027
ZNF207	0.389430394048402
APX6	0.389385436415316
At3g61590	0.389080746190529
osgepl1	0.389050499481296
SUMO2	0.387264633695981
SPPL2B	0.387253186883808
CYP707A2	0.387169470326118
At1g64760	0.387025516056595
GTE6	0.386396090978096
GLYR1	0.386294223700103
Dml	0.386167120195109
DHBK	0.38615263437286
Os01g0760600	0.385732289584062
IPMSA	0.385702010449314
PHOT1	0.385144580617314
RBP45	0.384882007836602
CESA8	0.384601295292274
IDNK	0.384455374181425
PHRF1	0.384124598517835
RPL21M	0.384049823870767
At1g19340	0.383656529566422
mis3	0.383648045881451
SHL2	0.383498148277232
At3g27390	0.383297100809879
MOR1	0.383131998301272
med6	0.382982606667134
RBG2	0.382015328590845
TBP1	0.38172021523699
SDP1	0.381509609312873
Pcbp4	0.381402538289387
CNR6	0.381363282556386
ZIP4	0.38126813736067
CYP72A1	0.380641753239942
ARGAH1	0.380422039114303
At3g27150	0.380147587059777
TIC40	0.379938646278262
OsI_15387	0.379664276856145
DDB_G0268328	0.379476986813503
ANTR3	0.379433655175875
Stam2	0.378933825385038
CDKF-4	0.378294820817395
VIT_05s0051g00580	0.377978724556251
cwf19l2	0.377665748495983
MTPA2	0.377594920545918
pitB	0.377402037352782
PTP1	0.376826495475518
NSI	0.376212841103605
At5g61540	0.376054849887963
PEX19-2	0.376049958306854
Smg7	0.375646930721865
GGT1	0.375467169357288
At1g52590	0.375344506766803
UPF2	0.37522338997085
At3g05950	0.374883094023066
SLC35F5	0.374784974276238
cmss1	0.374628003523949
Gpatch8	0.3737620454333
TRIT1	0.373686768081905
At4g26450	0.373675832318084
rplN	0.373583160243069
armc8	0.373422081322233
PPP1R7	0.372825872869334
UGT91A1	0.372768131498912
med23	0.372719387007862
RMA1H1	0.372698970182557
CCX3	0.372477596817085
CDC25	0.371999811966777
mul1	0.371808340326594
At5g66910	0.371408349259562
GALT3	0.371194225374191
XPD	0.371088012175931
Os07g0563300	0.371069200148228
BAM9	0.370998498198157
SSRP1	0.370885048179433
wdr75	0.370555214087562
AUXI1	0.370477410491718
SKIP15	0.370402585184837
PEX1	0.370308661621138
CYP98A3	0.370287271848144
CCDC130	0.370086486159224
PEX3-2	0.370031247203395
Os01g0158000	0.369896254045707
hflX	0.369290322864667
At1g65420	0.368864541450058
[truncated: 3,518 more rows]

## Sheet: 700_CL153vsIcatu
Gene Uniprot ID	log2FC
htra1	9.97582894672789
GT3	9.92185603119275
PER12	9.63260822338799
ISPS	9.43803733760831
AAO3	9.25673983054305
SOT5	8.70375703764396
argB	8.54713125701595
MNS2	8.18262384683452
BURP3	8.10766178375594
ABCA9	7.69630624033872
CYP75A3	7.65618975345574
Os03g0405900	7.36688443743541
ACT-2	7.32402080438783
CCD7	7.25607574381178
GULO	6.97179215418514
GPAT5	6.96385727712153
PECS-2.1	6.91470343305917
Os03g0651800	6.90243427951568
ERF025	6.84668337906544
CCT8	6.81781658208285
At3g08610	6.71974353403044
MYB113	6.67591165178634
BHLH120	6.6463838464829
DOF5.7	6.57807946025106
SRR1	6.53851041939045
glnD	6.49600815070562
At2g23540	6.39928208498476
Tmed2	6.26410630440261
SULTR3	6.21130854919443
GLUA2	6.20462884259114
rhiE	6.19440116792988
BSPA	6.18850785339825
CYP82A1	6.15633812760424
CXE2	6.1472450217407
cct2	6.07998611066251
cotA	5.96871009911985
ABCA11	5.93695034379533
At5g63020	5.92108586283946
FAR3	5.91459140140791
Ank2	5.88591907654758
CLF	5.87714677772763
CYP86A1	5.87659792261124
ERD3	5.83942194559038
ppt-1	5.82861014399804
co-2	5.82015898589609
GH3.3	5.71930760132999
H6H	5.65380787519893
CYC02	5.60303368028635
MYB305	5.55875293163997
AMT1-2	5.50522691055296
C1	5.50331484132374
At1g35710	5.44426126062308
OPR1	5.36783070143885
C12RT1	5.3476941659622
RUB2	5.30512298522893
IRT1	5.29587068232519
Lto1	5.29186610677777
yif1b	5.25156022868341
proS	5.20820800453048
AHK5	5.20144245250522
HHT1	5.19684820651762
SOT12	5.17869772584119
RING1A	5.16731195876691
ADR1	5.0981311318014
Slc47a1	5.06506539644959
cct-2	5.05125022526969
CBSX5	5.04660864694908
CRT1	5.04361836505547
WRKY56	5.04096410090781
PLT4	5.03472872618527
BA13	5.03271496190569
VAS	5.00877499670937
GH3.1	5.00683772522557
GT4	4.98704050708972
SRG1	4.96080552415712
BGLU11	4.9521842873317
POPTRDRAFT_752786	4.94752321487123
UGT74E2	4.9379570370228
CRYZ	4.93176453881008
At4g22030	4.92288387030399
R1A-6	4.91518791126481
FAR4	4.89899345913891
SCR	4.87106774039663
FAR5	4.85267229016289
BC1L6	4.82600937762639
aroE	4.79754221727319
S-ACP-DES6	4.76413467874443
EPHX2	4.76240568797944
BHLH27	4.70590198317911
PER21	4.70157836682759
At1g28570	4.70029905832415
PUP3	4.69988787328951
PBL8	4.64428156406049
At1g61310	4.64117340131369
At2g16710	4.61658515251956
PRO2	4.56400194673492
DREB1A	4.55359817281856
ABCG10	4.50755776295629
LECRK41	4.50589780281914
MIK2	4.45589039100711
rpa1	4.45105778405782
CDKC-1	4.37460120010646
CBL9	4.34524450509586
GLIP5	4.33070145300936
UGAT	4.31553579627002
POPTRDRAFT_823125	4.24364995945723
LTP4	4.18873052792278
NPF8.2	4.10241042256563
UGPA	4.03921799145288
DAHPS1	4.02831937540318
CXE12	4.02484095184946
PK1	4.01013982294885
A	3.99941704452012
LAC14	3.97126984074828
TRX2	3.96390592101226
At5g45510	3.94449151451867
At5g39020	3.94370319954587
AGL62	3.93058737598641
DTYMK	3.92775003774864
NAC068	3.89382918778906
PUB17	3.85183405700746
RPM1	3.84083390168068
GLP6	3.84018372106403
WAKL11	3.83613806783144
BG	3.8352361860241
CBP	3.81907319375725
TSB2	3.81443968938128
dnajb6-a	3.80483407563108
ACO4	3.79093256562288
GEDH1	3.78428924926887
At1g07440	3.78005260619187
At4g06598	3.7794750364118
tlp	3.75362309392563
ORG2	3.74155292327741
LRK10L-2.8	3.72946970766617
CYS5	3.71865961021482
CDC48B	3.71717424741812
GES	3.70757855436803
PER11	3.70307009352657
PCMP-H28	3.67631458075087
SWEET2A	3.66026882305692
CYP75A6	3.6593840357342
CET1	3.60307252020092
LAC17	3.59993449452907
At3g43660	3.59334919712701
Os09g0529100	3.58088221132767
At5g59530	3.54673979308058
TIFY5A	3.54105623056286
BAM3	3.5324590438156
MYB4	3.46944119277054
PBS1	3.45450818554703
DREB1B	3.41825377351406
PI206	3.41673738764519
At1g14650	3.39815914720254
TMEM45B	3.38777380295035
PHO1-H10	3.37429384228225
GSVIVT00023967001	3.36867413001821
NAI1	3.30220773090804
NAT7	3.30081312761571
CHC1	3.29892231657523
PAO3	3.28777466299701
POT5	3.28718408700705
GUX1	3.26319567793799
ILL6	3.25997446507704
UGT88A1	3.25091877405958
SOT14	3.2276114904854
At4g31790	3.2213940732102
NPF5.8	3.21515764681597
DXMT1	3.19605833084282
Cactin	3.18779965102485
Os10g0513300	3.17989243733007
LAC2	3.16875533330044
XCP1	3.16869360190174
dnaJ	3.16798736580245
SCPL20	3.16231422194281
At3g07010	3.15673999599187
tuf	3.14834821336705
PDR3	3.14251226645345
At1g59620	3.14086572270989
BAMT	3.12224133764589
SHR	3.10670021695409
PUP21	3.1060648966925
IRX12	3.09583501705453
MIOX2	3.08793826149914
DAT	3.0862958560358
Gins4	3.07846956541271
B19.3	3.06900469877761
At1g14600	3.06127395512283
HNL	3.03813119448777
tag	3.03307185474642
CRK6	3.01022518815895
faeA	2.98182491880244
CYP78A4	2.96804258935576
Os01g0705100	2.96407975572166
INV1	2.96136244004378
EAS	2.95634213160698
At5g22580	2.94651968551339
ERF1B	2.93743045232471
RGA2	2.92569576067355
CEBPZ	2.90999911224408
ABR1	2.89656768044862
CYP81D1	2.8752387324371
PME8	2.85464181812897
MAP70.4	2.84534267801387
LAC12	2.83704478280673
DES	2.83437571502237
RGL2	2.83292582968769
RGA3	2.83126790792778
YPQ1	2.8280059305243
UGT76E3	2.81509020966076
RPL13AB	2.77213600832623
TIPIN	2.76758528157982
rrp4	2.76272296384408
CHLN	2.7427939114487
nep1	2.72417122764864
CYP93B1	2.72195082366783
At5g24080	2.7061145981031
APMAP	2.68311310393398
PAT03	2.6804507289911
MLP31	2.66283123363192
TPPJ	2.65742228639774
At3g05150	2.64393760823416
CIA2	2.63737365869077
AG2	2.62632224396853
YSL1	2.62497432139449
WRKY41	2.62020159533069
U2AF35A	2.60576076224428
CYP716B2	2.59797424900271
LBD30	2.5918383130046
PARC	2.58913544499387
At3g03360	2.58781439787926
At2g02240	2.57802659948397
PXM16	2.57800419335766
Os09g0568700	2.57514202056925
OPR2	2.57434338744564
At5g14450	2.56457481662382
DBP2	2.54762377411268
ACA11	2.54565840402787
PDLP2	2.54202291190133
At5g37690	2.52769480111161
AFS1	2.51748053066547
PAT18	2.50927208745789
At3g26430	2.50514279344335
GSVIVT00037159001	2.50317067889059
ABCB18	2.50199584870762
RFS2	2.50004756669301
GUX2	2.49254645617106
GDH1	2.48354666070097
CESA8	2.48060777765689
ABHD17B	2.47961432819447
PHA	2.47932410772916
PCMP-E91	2.46891889477298
UGT76E1	2.4616107194029
At3g50280	2.46051903502449
CYP704C1	2.45901120449241
ephx3	2.4563677945332
OTP43	2.45239392228381
KAS1	2.44822290606496
CESA9	2.44433154236941
DYT1	2.44315129452225
MSRA5	2.44302361288784
At4g26340	2.44006275451507
At3g56230	2.42780982634718
CYP84A1	2.42691551738559
At1g75280	2.42301239645175
TIP1-1	2.42269057600013
GAUT12	2.41754482212811
STR17	2.40554029050762
GRXS2	2.40503498788165
SPBPB2B2.05	2.39738686936542
RSI-1	2.39292380404865
CYP82G1	2.3922258266813
RPL17B	2.39061310311533
NPF2.11	2.38876824187932
ERF114	2.38501305806305
PR	2.38287281669073
LAC3	2.37816370947577
HD3A	2.36271349987512
CESA4	2.33833499098659
NAC100	2.33736413966567
RNGTT	2.33681651836642
Ehd1	2.32582642611421
BMY1	2.31324486981128
CSLB6	2.31122159056015
CODM	2.28953993154793
BGLU40	2.28576577776559
BHLH36	2.28572619475936
TDT	2.28554957093843
PUB23	2.28286907648627
caskin2	2.27793989257543
At5g61750	2.27646782424155
EMG1	2.26388155977876
FMOGS-OX5	2.26294166973076
CYCD2-1	2.26089961709518
DFR	2.2491857698414
NAC071	2.24130041034975
RLK1	2.24095813970846
A622	2.23741427737055
At5g24760	2.23623056355537
R1B-12	2.21215719625064
ASNSD1	2.20987667029358
At5g37990	2.20953015661452
CYP75A2	2.20834055548384
nicC	2.20515028243455
GDHA	2.20416231129931
RCH2	2.1910138020236
NEC3	2.18716762488027
IQD31	2.18237030900836
OSH6	2.1776611373868
uxs1	2.17575281105297
ATHB-52	2.17283196396902
MADS3	2.17281820770629
ARR1	2.16994212487727
MFT	2.16962772596566
Exosc10	2.16253793259147
CYP98A2	2.15964597111364
MAKR4	2.14376081172533
CML25	2.13647843781852
HST	2.12851849118316
ANTR3	2.12722962054304
ARF7	2.12360455214971
ABCC8	2.11646778191502
ALDH2B7	2.11460566454273
At3g05950	2.11389165927577
UGT75C1	2.11265466946329
rnf44	2.11078535725821
sec14	2.10889068960813
ABCG36	2.10848670807521
PME54	2.10644163045891
Os12g0604600	2.10448185558194
Os11g0197600	2.09263203304293
CHIT1	2.08337328515447
ALD1	2.07982635564421
Os03g0255100	2.0791825122236
NPF5.10	2.07726194256889
CPK20	2.07116152810568
pyd2	2.06624322556306
CHN50	2.06406269851317
WAK2	2.06257990514486
ARI2	2.06037923922885
At4g13710	2.05992678826089
CHX20	2.05611188551436
At1g06800	2.05315308030914
ERCC6L2	2.04253648876308
SAMS2	2.03888248432763
SAPK3	2.03706298123834
LAC11	2.03388887769159
BGLU12	2.03209952160385
hddc2	2.03129268685309
NLP4	2.03004030199184
NAC029	2.0248377480738
DRIP2	2.02045126410569
BCK1	2.0171306800775
GER3	2.0144269505409
Ank1	2.00261782047275
CCD8	11.2100216655439
CHIT3	10.6776887186506
ATHB-8	10.5789553354076
ERF9	1.99715733508321
MAP70.5	1.99132278401477
At1g62590	1.98351572165141
RPP13	1.9791036262294
CST	1.9717749926328
RAX2	1.97086198884064
CAB1C	1.96892063871409
CBSCBS2	1.96874194270327
FPP7	1.96042018383323
TIFY10A	1.95602773156793
SPBP4H10.07	1.95116481595998
R1A	1.94861367538322
RGA1	1.94770451867116
PCMP-H27	1.9435473117056
AtMg00910	1.94127048463604
At5g57670	1.94102452765243
CYCD6-1	1.9242737946729
BHLH111	1.92297271497738
Os03g0622100	1.91771951134886
CAX3	1.91685969548189
CYP40	1.90609942318911
Skeletor	1.90098263460052
At5g08350	1.90048577662566
MXMT1	1.89922720013133
AIR12	1.89831988889381
fadD28	1.89821441482246
FT1	1.89701678333376
HIPL2	1.89603824767157
BXL1	1.89166879048107
At2g40270	1.89157091158474
phaJ	1.88830095388438
NAC043	1.88629632384275
xynC	1.88316441054975
gluA	1.88219006989797
SAPK2	1.87926931928421
CHX3	1.87607248682236
Esyt3	1.87463508074435
HXK2	1.87088730271035
TDC	1.86871928636719
RBG8	1.86803992372247
CLH1	1.86758684298042
XTH15	1.86505111166939
MTPA2	1.86448083445263
zswim7	1.86397135635788
XTH10	1.86359965999297
TYRAAT1	1.86342475040213
KAO1	1.85274767898171
COBL4	1.85157759783333
Gulo	1.85150126563598
COMT	1.84766218806132
BGAL16	1.84081915949428
SCPL18	1.83982902859839
IRX9	1.83840026113883
WRKY12	1.83706578904715
PAP20	1.83214292920783
At1g68410	1.83120563326826
ALY3	1.82718613895972
CTS2	1.81514467826186
WAK5	1.81089531642382
At2g27500	1.80906533622765
DDB_G0268948	1.80746824100752
At1g33170	1.80117774498809
At5g01110	1.79650327379404
HSP23	1.79516788437467
RSN1	1.78726571520936
ADF5	1.78696541975007
AMC3	1.78613777084247
ZFP3	1.78595716746963
PER73	1.78577260691373
EXLA1	1.78262869333292
At1g61340	1.78009527556225
BXL5	1.77929178113829
At5g20640	1.7760259371859
BCAT2	1.77548471346713
GAPC	1.77235078728812
gdhB	1.76938996849194
HGO	1.76715539962032
UGT74F1	1.76300767428531
OPT3	1.76215162148372
At1g60420	1.76135778487677
Acel_0614	1.76014511495901
TUBA	1.75976567727804
ERF023	1.75589359790052
GATL10	1.75381191515669
TCP8	1.74843547522022
KIN14N	1.74805846974818
GNK2	1.74619339398667
PHYLLO	1.744111676246
AHP1	1.74320984087259
SPAC24H6.01c	1.73997770622416
ATL3	1.73613106167411
BGLU10	1.73548811826527
PTI6	1.71228649477149
RD21A	1.71030829779666
yjcK	1.70708191598254
At1g54610	1.70629361756101
NUDT1	1.70566003361095
ATL6	1.70177695450129
PR2	1.6980903875895
ACS3	1.69679820124978
CCX1	1.69469403775288
mcfW	1.69380086631902
Mettl17	1.69127112340503
ERF12	1.68961628205427
At5g41590	1.68554246076297
RAC13	1.68104003302819
KINB1	1.67900953339514
GT6	1.67201162069651
rplL	1.668599385026
At1g74360	1.66726779061771
LECRK42	1.66613878446611
At5g15010	1.66383109511851
thiO	1.65712800439314
At1g74460	1.65534419435414
DDB_G0282005	1.65493349808217
MDP1	1.65256436194388
NORK	1.65231124724609
GLR2.2	1.6500797291606
At4g11680	1.64611129745071
MAP65-8	1.64535863865938
MFSD14B	1.64321913883177
ODO1	1.63464239962187
At2g24040	1.63273049476017
oatA	1.63219083783831
UGT75D1	1.63034915841997
CYP707A1	1.6295299911069
At3g06240	1.62503800184179
VIT_16s0100g00290	1.6224465052848
GRXC11	1.62060851598475
Ogt	1.61932357463461
CHIT1B	1.61797318170031
POT6	1.61691680285402
At5g26960	1.61581053066673
RRP12	1.61391097403177
PAP3	1.61152430924532
At3g54980	1.60811614354292
gyaR	1.60741431521189
At5g05130	1.60648532529402
CSLG1	1.6063889475176
YKR070W	1.60571916796399
SAMDC	1.60073174831813
Os01g0252200	1.59945021752972
EBM	1.5948523446651
DTX41	1.59451922942056
RLP12	1.59376749778277
OSB1	1.59330962344961
RPT2	1.59239902211929
RECQL4B	1.58774624325005
exgA	1.58723823988723
NAC007	1.58689841486668
GS1-1	1.5852776932498
ACO3	1.57959213963199
HMA4	1.57955624891598
PMM	1.57895508669836
At1g02060	1.57694258383867
Os09g0533900	1.57444032231895
shmt2	1.57351993958819
GRP-2	1.57272210556801
Xyl2	1.56995960375777
speA	1.56983910251945
SGS3	1.56961869624695
BHLH35	1.56759306460613
KAT3	1.56713319008209
HSFB3	1.5645061987519
T85	1.56327365984536
SAHH	1.56257326236892
GINS2	1.56190211365369
CYCP3-1	1.55486496397035
SBT4.14	1.55202441016287
SPAC644.07	1.5508094475486
WNK5	1.54637273461131
ATHB-13	1.54471103812261
ABCB9	1.54340163636383
At4g27290	1.53879004393315
CYP90C1	1.53138885586773
LAC7	1.53014836961945
At1g67750	1.52957982831381
ATL15	1.5278868210875
SPO11-1	1.52754705071299
SWEET3	1.52754525194896
mph1	1.52601395343804
LRX6	1.52304071920799
BHLH110	1.52199053953435
NLP6	1.52150057755702
CHX18	1.51811927921156
arcD	1.51306939189841
T6ODM	1.50960926730056
mkkA	1.50480280474894
KEA6	1.5012968107777
FLA11	1.49962628171698
ARF6	1.4985369453707
TIFY10B	1.49836956412569
SWEET3B	1.49468141047076
BAG4	1.4934818325157
At3g08680	1.48913381464402
HSF30	1.48863629656867
VSR6	1.48862818161238
FRK2	1.48671289058199
XTH9	1.48578306809064
ARG7	1.48308467210285
NFX1	1.48281556529133
At4g22990	1.48100065817226
BT3	1.48087937416471
p20	1.47838276254555
HOMT1	1.47609595590824
BXL2	1.47609244424383
UBC28	1.47172459711963
Mtarc2	1.47170306306088
KIN14M	1.47134226486625
CXE17	1.47050334453868
At1g62680	1.46734955405411
GSO1	1.4672346368547
mcfF	1.46504412899614
CYP85A1	1.46307578672159
CNGC8	1.45779242186371
nphp3	1.4557199714322
At5g22730	1.45489819764024
At3g14460	1.45421905215376
RPOT1-TOM	1.45421495722275
Tatdn1	1.45180922946279
GIP	1.4501727374924
HSP83A	1.45002080733807
NPF4.3	1.44902010134511
SD17	1.44768008185979
At5g13200	1.44619940403286
Emg1	1.44583604582497
ZAT11	1.44426657610862
purH	1.4396008387113
At2g34210	1.43746739603235
POP1	1.43726394045226
TPS11	1.43216420423247
At5g62930	1.42977358453847
STN1	1.42780449284643
GA3OX4	1.42770562219454
NPF5.2	1.42626648196635
PER49	1.42326263805072
MNR1	1.42320405415754
SKIP1	1.42066852204189
SODCC	1.4201798402752
HSP26-A	1.41751957777252
WAK1	1.41415544589006
HSP70	1.41383077663805
Mutyh	1.41332686750399
LBD15	1.40973624831922
Dpys	1.40543195537778
pgap3	1.40522253499874
GT5	1.4030029518848
FBXL14	1.40255345727883
TPS9	1.4022982356026
At1g13630	1.40196175172237
SCPL35	1.40173432950808
TPP2	1.40048751683378
MCTP1	1.39639006817327
PDCB1	1.39565612605176
TUBB1	1.39389078270911
UXS1	1.39162904945224
CAJ1	1.39060761358411
At3g13860	1.39037577541121
CKX9	1.38968927769355
VPS2.1	1.38817233340633
PCMP-E96	1.38439260852255
ZFP2	1.38028247352765
PUR7	1.37878186306285
PRXL2A	1.37698992228186
SPL12	1.37624779136288
AVT6	1.37606045477551
PIP1-3	1.37513437999525
DHX37	1.37512640644407
HSPRO2	1.36718797017422
LIS	1.36703908926891
NFYA3	1.36666900631956
SYP112	1.36226325139278
PPC6-7	1.3620497205641
SCPL48	1.36048234916412
SODCP	1.36023110363708
CWINV1	1.3567739505635
AMC9	1.35581011867529
polC	1.35519811861717
ELP6	1.35266465271582
dscc1	1.34713321108541
CYP80B2	1.34615733103593
FLOT1	1.34078052964018
At4g10780	1.34011910895233
BZIP9	1.33443446301426
PIP5K6	1.33401165550438
BB	1.33269053325837
mhkB	1.32991399231514
DSEL	1.32517273031976
SDN5	1.32334760204113
UGT87A2	1.32024171349249
PER10	1.32022790494876
Mfsd14a	1.31982475615527
NFYB8	1.31871047752896
At1g75720	1.31761578451208
SN2	1.31618258349182
PCMP-H34	1.31596181333926
ARPC4	1.31283702006986
At1g28695	1.31233905663582
ACO1	1.30990248530363
BHLH112	1.3066253145611
B34	1.30361973185275
PER63	1.30336999648535
COP1	1.29946104461755
IPT5	1.2993006674972
NTF6	1.29410664714824
Tango2	1.29297442153533
snrpf	1.29230197116402
XBOS31	1.28935333367097
BON3	1.2876868401883
GA2OX3	1.28619059556301
OXI1	1.28576474546561
NPF5.7	1.28500242024366
MPK3	1.28109734199436
XTH32	1.28103264308823
FLA9	1.2726683492093
RGI3	1.27255248264629
At2g17670	1.27114922210124
At2g38640	1.26866722187724
Ercc6l2	1.26683978445588
PER72	1.26683823026059
ERF061	1.26622725918155
PIP1-5	1.26602589973705
HIS2A	1.26567988230511
At1g66480	1.26526609109765
DDB_G0272012	1.26224849845778
LIG1	1.2620096543635
GATL6	1.26153595126072
NPF2.6	1.26124691901697
At1g60710	1.26067317042169
XMT1	1.25704176842185
AMP1	1.25547489024617
BAG6	1.25229620514289
LIP2	1.25229441066586
mnmA	1.25219476875748
UGT86A1	1.25096531643629
PAP8	1.25051553035732
DET2	1.24746735082535
BAP2	1.24458064510108
TCTP	1.24418575026733
GAE6	1.24395203347727
At4g17550	1.2423818536405
yocS	1.23952104222974
BHLH19	1.23922748362768
F8H	1.23781047220058
FKBP43	1.23393477235331
CAX1	1.23224374082957
ucpC	1.22572007024751
Y-3	1.2256482165906
HIPP26	1.22545300377632
Uxs1	1.22500030557539
PTB	1.22261940816968
R1B-13	1.22241829630346
ATH1	1.22105021730356
RFS	1.21955087698192
ATL80	1.21819847829908
RCOM_0864260	1.21661699693912
TIFY6A	1.21602709278447
CCR4	1.2135670731462
At5g18390	1.2111858380485
NPF6.4	1.21078327001857
At5g08460	1.2099862994994
CPN10	1.20900248177966
HSP17.8	1.20821486206645
BHLH66	1.20671488454491
Ganab	1.20632590314024
pehX	1.20431267458578
ATL42	1.2037860967688
fcf2	1.20164453468361
HDC	1.19973505153343
OsI_031067	1.19757056363392
CSLE1	1.19614190696947
PLDALPHA4	1.1958900645644
CYP71B36	1.19418313015479
PCMP-H16	1.19296857397631
PCMP-E83	1.1925550878076
PLA2-BETA	1.1914690123268
NAT5	1.18948376841176
GAUT6	1.18943224819244
VIT_17s0000g00560	1.18879130997724
CYP86B1	1.18836318281509
RD19A	1.18614545210679
PDC1	1.18603293968021
At5g48730	1.1852592217075
AAP3	1.18388479076622
PER64	1.18308951080574
At1g72960	1.18289329549048
CPK1	1.18185893705876
PME12	1.17887245684788
hfm1	1.17853874991629
At1g33811	1.17780572792063
Os10g0113000	1.17779252954986
GT7	1.17628072660027
AMY1.1	1.17623828244313
CNGC2	1.17580061368419
DRT101	1.17343279403317
PAP28	1.17304898899118
Paxip1	1.17293718858659
CES101	1.17169974148919
ABCB15	1.16995761886107
MSRB2	1.16958133768737
HB1	1.16739899224057
EHD1	1.16734673934937
At5g55150	1.16632180907933
PCMP-E27	1.1660488804622
SLAH3	1.16542798557664
RING1	1.16514792430814
qorA	1.16454001237606
ACA8	1.16433982900899
B120	1.16359298410149
Dhx33	1.16085582552298
TIP2-1	1.15951364129918
Mfsd14b	1.1546741760082
AAP8	1.15446643904051
SERK2	1.15404774230647
GATL1	1.15032740352163
CYTB5-B	1.14941336378695
PMS2	1.14812411530706
At3g10080	1.1462665746656
Mcu	1.14560701007375
2003-04-01	1.14499247468917
SKIP25	1.13929773468483
MOCS3-1	1.13835456673222
At1g60690	1.13705639834759
PIP2-7	1.13665574565436
PNC1	1.13373838508724
GRXS10	1.13198151061835
GASA4	1.13161813778532
PCMP-A5	1.13156825865965
PERK13	1.13144936498063
DCLRE1B	1.12943260566881
ATPB	1.12753270001851
Sec13	1.12517974102804
At5g63180	1.12479683927793
At1g25530	1.12065636895063
UGT83A1	1.11997732236854
CBSDUF1	1.11914319003987
KING1	1.11849661357618
VIT_01s0010g01180	1.11784463715128
drkC	1.11668710552076
AGT2	1.11398383659678
At3g47420	1.11166667102474
GLIP1	1.11154208244318
OEP163	1.1113438804877
MYB86	1.11066115160603
RPS2	1.11065372145119
PIP1-2	1.11064973592107
At1g80440	1.10893362869504
GA20ox1D	1.10824206617748
ATL52	1.10721606888635
At1g05150	1.10571477028184
HVA22J	1.10150592608395
BGAL1	1.10010388608188
At3g58140	1.10009862041153
At5g47540	1.1000473076249
SPAC869.01	1.09989689493
XDH1	1.09899770989345
At1g75040	1.09696100725887
ARALYDRAFT_321547	1.09660232790258
Hnrnpab	1.09583399725301
CLC-B	1.09576140548692
At3g12180	1.0954060595519
NCED1	1.09434939285388
RPL32A	1.09380245390439
SPBC3E7.09	1.09372693644254
HVA22E	1.09341419756474
JMT	1.0924269425429
WUN1	1.08965770931654
KCS1	1.08680854444111
slc38a2	1.08637299690167
trmt6	1.08488960999248
PCMP-H32	1.08390366691414
At1g05600	1.08309335785899
At4g14103	1.08187342918711
EDA2	1.08162224482759
Cbwd1	1.08093730150888
TCP5	1.07833867089529
bipA	1.07804655410521
KINUB	1.0760782388867
IDNK	1.07555776589181
MYB21	1.07408095944309
TGA7	1.07207783472885
XTH16	1.07131308538507
CYSEP	1.0698977086874
CRN	1.06868064014189
ANN5	1.06798187971797
RPL13AD	1.06636229780911
CLC-G	1.06625829199746
ITIH3	1.06601955897088
NECI	1.06571928943638
XTH22	1.06511971253135
FRO2	1.06398788436054
ALKBH3	1.06305891871806
PHO1	1.06284793279059
FTSH	1.06169525650865
KAT1	1.06071949478423
PCMP-H60	1.05945260049666
HI_0077	1.05738923941343
ATL24	1.05525752527499
ANS	1.05420077222005
Immp1l	1.05360064335204
Os01g0813400	1.05306539373915
cdd	1.05197753799057
PERK8	1.05042003481194
thrB	1.04986256570015
NAT3	1.04861988148852
LTPL1	1.0485007009924
GI11683	1.04808641042802
XRCC2	1.0462017482978
NUC	1.04414722035631
PERK15	1.04255818751753
At5g03610	1.04239942660996
ADCK1	1.04117450269519
MPK9	1.04109693961591
DEGP14	1.04085585445054
SAMS3	1.04025428537376
SKIP31	1.03972512237009
PYRAB06230	1.03897293817729
ACA10	1.03782663905726
CML3	1.0369068897798
ZOG1	1.03616486879231
ATHB-20	1.03581324642587
At3g63340	1.03485237534202
BAG3	1.0341013653065
ucpA	1.03306401585081
CRK25	1.03291117716236
SDP1	1.03284591694269
RPL17	1.03065540136214
sap-49	1.02874884921323
STR10	1.02283313525573
At1g25240	1.02157504048428
PCK	1.02113559780031
RPL21M	1.0191491535696
At3g19850	1.01858046550234
RPP8L4	1.01713390971146
NT5C2	1.01710692035563
PPD	1.01639117773892
PP2A13	1.01630960127773
PUB52	1.01608874990698
At1g01350	1.01516517910436
BGLU18	1.01411457435277
Dagla	1.01362456600781
maoI	1.01350760690716
CNX3	1.01322969939467
PCMP-H68	1.00962300223977
DCL3A	1.00802071559635
At5g18500	1.00527651725091
EGC1	1.00462392833986
PRXIIB	1.00370220210872
Marchf6	1.003684173703
ACX3	1.00216147768405
At3g53850	1.00095344947556
HMT-2	0.998976618261172
ICR4	0.998494835854162
At5g55050	0.996024231959131
PGL1	0.995474989924225
Mad2l2	0.995470974850347
METE	0.992088433127467
At3g15810	0.990647730999832
slc32a1	0.990627645419774
At3g23880	0.990607715025363
PCMP-H24	0.989790083061422
UGT71B1	0.98929501844473
ATL33	0.989040166389759
At3g19508	0.984898606233161
ENPP3	0.983577738902215
XTH23	0.982692317896768
DGAT1	0.982350237021926
Bub1b	0.980997685991525
TIF3I1	0.980439455792343
trpB2	0.980156289386385
SAHH1	0.979430005257757
dur3-1	0.978249216016929
meaf6	0.977417482989575
HI_0193	0.977144698947241
GLCNAC1PUT2	0.976081913752535
EXD3	0.975578188974505
AS1	0.975322225874452
NUDT26	0.974827222020622
Slc25a32	0.97362100229217
WRKY28	0.972303067134652
RPS17	0.971848262592959
At1g09820	0.971816443165217
SPL4	0.969898411313168
XTH33	0.96957688946307
pin4	0.968689794359881
BHLH157	0.968205489763597
NEK2	0.968196234092307
UBQ4	0.966406274230643
GAUT11	0.963391525420107
DDB_G0283291	0.961664373440323
BHLH106	0.960724385273723
NAC002	0.959552503011481
RDR5	0.959361543831275
PDE247	0.958938221252854
RMA3	0.957974312874529
CSN4	0.957554670686979
SlH4	0.957008774825245
COBL7	0.956886056990901
METAL1	0.956715435275119
CKI1	0.956338100990632
At3g22470	0.95583354795248
okr	0.955479310705278
At1g29670	0.955011757878675
IQD32	0.954527148209521
SCPL29	0.951228219992327
PME40	0.951224034381721
At2g17570	0.951097704228222
CIP111	0.950276799660184
SPAC57A10.07	0.949119201282017
At1g19940	0.948868839367651
Ctsb	0.947000334708033
At5g67200	0.946844134398221
UGT73C4	0.945057911441294
CNGC4	0.94423957224886
SRO5	0.943916295866516
HPT1	0.941999424345734
PCMP-E102	0.940664728770361
PCMP-E90	0.940465371856038
At2g17940	0.940305877928871
ABHD6	0.939160745549505
CASD1	0.938536989583497
ppi	0.936684485768467
SLC47A1	0.936496052183093
SPBC1271.03c	0.93583824332078
Stxbp5	0.93480290302717
cse1l	0.934173000964413
CDT1B	0.932316973448874
At2g23950	0.932252352670925
FAH	0.931257072349842
RCH1	0.930956025167515
CSLG3	0.930403788737486
OPT4	0.929995443734504
PSMD10	0.929699159333038
NHX7	0.929380954098926
Dnajb4	0.927395855383228
SNF4	0.927266638084794
GGT1	0.927114986600074
CDS1	0.926935527433341
AAE5	0.926433969472494
WRKY75	0.926220670647912
At5g23170	0.924273926435156
dtdA	0.923301185440023
NPF7.3	0.92115384097631
amaB	0.919274711037987
SCL23	0.918638519684525
ASD1	0.916195416787934
kif6	0.914984491885781
METK5	0.914888390852045
TRAPPC13	0.914607628547219
At4g18930	0.91362687760495
At4g04670	0.912023783431082
Mgll	0.911928512589919
GATA12	0.911808820839781
QNS1	0.911629490600233
TAR4	0.911028006615979
XTH1	0.908254432119049
wdr61	0.907471064840039
Set	0.907414631507892
PXC3	0.906915986420368
CYP71D12	0.906791841361989
MODA	0.906606960455318
GA20OX3	0.906606530601027
POLE3	0.905957374508306
tsr1	0.904156447686455
ccmH	0.902293916713193
At2g40280	0.902050427809169
HSP70-4	0.899654771686463
gins3	0.898019417580248
KU80	0.896703606828505
RAP2-3	0.896145563716495
WAKL20	0.893669938851051
At5g56260	0.892841167898801
ERF2	0.892618626890008
LHT1	0.8918356988986
At1g32860	0.891583121804676
At1g66830	0.891299542841498
ETR1	0.89090564205911
ACLA-1	0.889162307849502
SF3	0.887514478324638
Smg9	0.887391555595184
PP2B15	0.885935937262664
trmH	0.885591564915276
RH28	0.88465661907459
PAT1	0.883680945607207
Os01g0233000	0.883536068309969
At1g68200	0.882670529109994
PDLP7	0.882500575893521
CSLG2	0.881982054335127
pno1	0.881491710448709
PMA1	0.880957241884891
alaS	0.880520397550359
PCMP-E7	0.880155056179946
TCP9	0.879741089693507
AGO3	0.879651959357239
MYB46	0.879339456542108
IRX10L	0.878021105049152
At4g14096	0.876619869402481
PRA1B4	0.875503242531008
QRT3	0.874596149174146
RAE1	0.874088178512082
CAD1	0.87282904350992
pitC	0.872761159424762
BHLH78	0.87213282634776
At4g11060	0.871689248022769
SPMS	0.871617413447777
ARA1	0.871495103568776
ENO1	0.871412868539625
Msed_2001	0.871133116853545
vatM	0.870566818882893
HDT1	0.869545689753315
Os03g0199100	0.86948584938412
COL15	0.867566743575798
ltnD	0.867274497238131
DMR_02110	0.866066134375959
EMB1444	0.866048890378276
BHLH68	0.86521907045274
Csac_1776	0.864372476930962
Lypla2	0.86364834146574
CKB4	0.86348450227905
Ambra1	0.861227523766647
msh6	0.861119794281877
UTP20	0.859917625434877
rpmA	0.859790901969408
AAP7	0.858960072371085
Vcpkmt	0.858403298918481
At3g06035	0.857852892101826
AHL	0.856298826754705
At2g35130	0.854891532251343
At3g14580	0.852971217283803
At1g55760	0.852936773035145
ADAT2	0.852551307135284
gatY	0.852048380374813
ILL7	0.851605678473684
spoT	0.851062168238502
AAP6	0.85090395041249
PCMP-E53	0.849994897673718
GA20OX2	0.848024127636998
DXR	0.847230690468069
pteN	0.844497695920047
At2g23930	0.844351404731146
SKIP6	0.843943945952866
UAF30	0.842869606731668
At1g64760	0.842528130737578
ADH2	0.842488204130122
ATP23	0.842319960660098
PSF3	0.842014999614051
PME34	0.841618912331724
Taf7l	0.840389837290523
TPK1	0.838780764967838
CGS1	0.838143040385357
UGT74B1	0.835976028444302
Cnot11	0.83531244966469
RPL35	0.834204465367107
TTC7B	0.833256969077754
CCOAOMT1	0.832940432121919
TRX9	0.832618138271463
ncdn	0.832579924412828
GLR3.2	0.83211323171343
UGT76E2	0.829855400427892
ABA2	0.829749790858548
rvb1	0.829528971421001
At5g06830	0.828216992768423
Aatf	0.827773770381562
POLQ	0.827344951609488
Rnf13	0.826999930114194
BHLH123	0.826742634511589
At1g14450	0.826617619242749
CCA1	0.825924416360807
OsI_15387	0.8256161588936
arc2	0.824510140771892
ACS1	0.823810787615856
Tmem97	0.823797806680512
At3g62470	0.822336052831283
At3g03300	0.822161675589174
MSH3	0.821607591448051
SPCC757.02c	0.820967215723184
pnp	0.81674958675797
NHX2	0.813213379123247
ABCC14	0.812774447788913
At1g22280	0.811303737563705
PDR1	0.810062254584245
MUR1	0.809711551869988
WRKY51	0.80932380464434
CIPK14	0.808980314098121
ZIP5	0.808434225758274
ERG3	0.808374793935836
CGR2	0.808106335027904
TT1	0.807427610252124
AKT2	0.806200711984041
BHLH74	0.806143602321028
TMEM245	0.805693290474249
At1g56345	0.805546334898097
NPHP3	0.804388837607411
alg7	0.802686658699516
CYP10	0.80241808088893
At1g67720	0.802206222767378
At3g49070	0.801657509357667
YLR126C	0.801522151047704
med22	0.801201764998377
THUMPD1	0.801165473288036
DUSP12	0.800799694061489
SPBC16E9.10c	0.800344100412258
ARL2	0.800117665856747
LOX2.1	0.799300076061821
RHA1B	0.798806874511695
rplY	0.79867248555813
At4g06744	0.798029536652623
UGT85A5	0.79780156425367
At1g10030	0.796467081112087
STR7	0.7961236428881
empA	0.795125146506142
CYT1	0.794978860258765
PAIR1	0.794471498106304
TRB3	0.793969694065746
casd1	0.79370670706579
At3g58180	0.793424936167343
trpt1	0.793247684507468
At4g21880	0.793080005723274
APK1	0.792322864190491
ZAT5	0.789850302520921
AVT1	0.789694536949524
xlnD	0.787704203078956
PTI1	0.787250094099172
ABCB19	0.786433870223202
ADF11	0.786278013913511
ttc33	0.785491597739023
Plekha8	0.784957683502422
GAMMACA1	0.783888819528754
At5g09310	0.783467861748945
ERF113	0.782455694991266
At2g33200	0.781435286102053
SPAC1A6.10	0.781025809032149
ALIS1	0.78004526141183
XBAT33	0.778111153840514
CYP94A1	0.777339201456615
NRPD1	0.777290397344067
API5	0.777274526839399
BGLU41	0.77676001009526
CBR1	0.776638712809434
VLN1	0.776539568129321
guaA	0.775166398410936
Smg8	0.77490658845032
SETH3	0.773013182436589
ABCC4	0.772861852281641
MKK5	0.772478092617129
CYP734A1	0.772245647720192
UGD1	0.771160944164284
Os04g0338000	0.77093001935477
At3g14410	0.769917072739995
dfrA	0.769463563257627
PEX4	0.767346930265112
PUB46	0.766853429403882
At2g30550	0.766522619050257
Tm9sf4	0.766427366675231
COX15	0.765139770903994
rbm24-b	0.764832572747898
LSMT-L	0.763937844671512
HMA5	0.763833676269837
ATL11	0.763387267327345
TMCO1	0.763241085773041
YML018C	0.759822693868449
CPK19	0.75736096867872
At4g18975	0.757201327707548
tmem45b	0.756136484011078
At1g59780	0.755635202121638
CHIB1	0.754593465289925
At2g25430	0.754155514662886
EMB2744	0.753713858231363
At4g17616	0.753573012570319
RABGGTB	0.753543355739469
UTR2	0.752425976597475
CS1	0.752418043736545
ZC3HC1	0.750661587779363
SAP9	0.750618795047981
PDLP8	0.750098644217866
At5g02620	0.748904307886866
v1g163572	0.748506417114452
plekha8	0.746702477557623
AIFM2	0.74563918291826
ATJ10	0.744777035326701
SAP11	0.744346157250018
Os01g0851400	0.744017517269662
Dnajb13	0.743340236377713
rpa49	0.743072448759209
PTI12	0.740995370140017
At2g43240	0.740145238980236
AAH	0.739390044730454
CS2	0.738527470442589
MYB39	0.738382588382532
PRT1	0.73833063105451
PEX11A	0.738104708422435
At5g09450	0.737685863965886
POLR2I	0.736927251705947
CLPP2	0.736840985353479
AMPD	0.735968329690638
guaD	0.735133823964054
MSBP2	0.734697518470158
rhbdf1	0.733817603578718
RPL9	0.733737597499551
STR15	0.73319241795458
SE2	0.732367876576395
AMYC2	0.732249892205599
TDX	0.73208784924312
tmem147	0.731704397219345
MSI2	0.730723708593095
PCR10	0.730319202604949
At5g67140	0.728405532195554
FDX3	0.726026963690942
Samm50	0.724830413572293
BAM9	0.724297012148895
PPIP5K1	0.723908639873212
Rnf185	0.723687091278612
GH3.17	0.72368306643889
COL2	0.723007463527175
ULK3	0.722762347297661
NTMC2T6.1	0.722272043412703
TYRAAT2	0.722082192924063
PYL2	0.721976689400124
ABCG25	0.721256882437461
MRS2-2	0.719399608490234
RPS9C	0.719209552285177
RPP8	0.718629678662654
rlmE	0.718573631743947
Mvd	0.718208986696899
mak16-a	0.717985419848462
At1g53430	0.717626399843257
At2g44050	0.715309723425132
PCMP-E23	0.714916830044944
BGAL8	0.713646740964742
PSK6	0.713564278883506
UBP12	0.712860631977184
ERG1	0.712100059808539
CBL2	0.712040510932471
At3g05520	0.711955963612212
SLC36A3	0.711688645169494
Noc4l	0.709762339196757
HAT22	0.709085769920079
TUBB8	0.709001447423138
SLAC1	0.708298113350465
ENODL1	0.708180123474315
FIP1	0.707137095084231
Mettl22	0.706337290725228
SCL15	0.706190840488397
ANN2	0.705733243117602
ATL13	0.70347954509965
At2g30780	0.702533434313717
A6	0.698933105370449
EP1	0.698438154073645
SKS1	0.698381444800393
LRX2	0.697901834756977
At1g01540	0.696051389182618
CBK1	0.695527389349578
RBOHA	0.695189108163473
GAE3	0.694619534655628
ara-1	0.694529638794339
AAP19-2	0.694383663797427
SUS2	0.694362148064119
PUB27	0.693886967040338
polr1d	0.693651673705406
XTH8	0.693536086313152
SLC38A3	0.692014455142529
Npepps	0.690793286529302
SCPL4	0.689559333047027
MLP43	0.689355204656644
B3GALT2	0.688604060749197
IMP1	0.68827789187573
PER16	0.687933748300151
PUB42	0.687919688622449
CPSF160	0.687699789463926
RTNLB12	0.687684616804763
DCL	0.687634468515216
PIR7B	0.687475471092118
tmem120	0.686593261986911
EMB2217	0.686221759470322
Ncapd3	0.684293603591124
DHX35	0.683571356270103
At2g26790	0.682447231396857
BEH2	0.681809260635927
At5g48740	0.681613268488776
GAUT15	0.681549638041595
yuxL	0.680784648213367
UBQ3	0.680669649545409
RBX1A	0.680400682315757
AGT3	0.679492259770684
murE	0.679260279394385
RPL35AC	0.679045993464436
DGK1	0.678254197751791
At2g23090	0.677585397877069
NPY2	0.676960963526005
MNS1	0.676951068222581
RABA5D	0.676834643349677
RPL7AB	0.676374568101709
TFT6	0.676222458163494
POPTRDRAFT_833824	0.675928774827015
arnA	0.675643363837773
MSL8	0.675491638289042
RBK1	0.673783435298908
DHAR2	0.672904690526685
Spout1	0.672845901044933
INV*DC4	0.672510191353174
At1g79260	0.672104339562277
Os07g0190000	0.670440887812723
TIFY6B	0.670359382969665
CKX5	0.670352440380071
CBL1	0.670148563659858
SBT1.7	0.670011521581707
slr0992	0.669727185099803
RAP2-4	0.66948224823793
CC-1	0.669145533208049
TRDMT1	0.669046457278338
SPCC777.06c	0.66855402603733
VAMP724	0.668080339806227
PRL1	0.667293369125338
rpc11	0.667193201432909
NOTUM	0.66714199839198
PPCK2	0.666862736368419
HMGB7	0.665277182612525
ROPGEF1	0.66501875934937
RHM3	0.664941350020272
COX6B-2	0.664222523861022
At1g80170	0.664069902397617
NCS6	0.663659993675464
RABA6A	0.66365157922342
PERK10	0.66342757365079
PER3	0.662684323670008
GRXC9	0.662482892147371
SRP9	0.662071965166374
PSAT1	0.661860326338713
At3g47200	0.661788643254814
PDX13	0.661502900626346
CYP98A3	0.659587577102422
CIP8	0.658291372193892
MAGO	0.657431334411388
PRA1B1	0.657322156312577
At2g20760	0.656398922438282
pcnB	0.655973220208958
SD25	0.655629247450296
Nop2	0.654965993437957
BRCA1	0.654914915775246
At3g01300	0.654858113692109
glpQ	0.654747975778986
MAN2	0.654464758040369
WDR18	0.654004609582866
Ik	0.653037304430267
SPAC2F3.16	0.652485563662828
TDR	0.652472515256104
At1g26500	0.651711821297496
At1g22220	0.650506365408783
ATHB-15	0.649373900137021
TCP20	0.648884505394464
MBOAT2	0.648749763212849
DDB_G0273453	0.648603063481019
SBP1	0.648254687579142
IRX14	0.648183646433042
ULT1	0.646620409675356
ERD2	0.645395399959655
SPBC16G5.07c	0.645246833038635
Os06g0717800	0.645100322802537
ALMT2	0.644753118871831
CAX5	0.64464129599144
PAP18	0.644302980763086
mal1	0.643781302125015
SS1	0.643690052775815
At3g27390	0.642099716939146
crls-1	0.642089209537168
RH8	0.641878953550841
ENTPD1	0.641511228304162
XRN3	0.640680019854423
AOX1	0.640644200806846
Os02g0506500	0.639976734675304
MCA1	0.639773255718836
HISN2	0.639674056629151
RPL4D	0.63964379276053
SHKA	0.639447151629319
SAPK1	0.638616119244865
POLL	0.636813945615189
At4g27220	0.636060795269411
ITSN1	0.63583296397519
ycf45	0.63554056178953
At2g44130	0.634607866363282
CCX5	0.634012934253423
INT1	0.633182447905702
U2B	0.632714574616891
RH35	0.630592997579245
At1g68190	0.630152899014822
CYSK	0.629538779466462
obg	0.629172726575572
At1g62810	0.628424382224533
TPST	0.627781548839644
CTSB	0.627779218585401
Rfc2	0.627482827579623
NRAMP5	0.627116651727698
trpG	0.62634335576749
XYLA	0.62596706994742
ABCI17	0.625847857594048
AK1	0.625484570854707
Rfk	0.624602814032361
Xylt1	0.623970966685858
RGP1	0.623793591787532
At1g28580	0.623777900917075
Myg1	0.623752922578292
adrm1	0.623235231858935
ZNHIT6	0.623204026683351
At4g29890	0.622235567991334
G6PD2	0.621628773781336
UBC4	0.621501326239412
At5g11010	0.621087425285569
CHLREDRAFT_128420	0.62105211400639
PDAT1	0.62005038304767
FUC95A	0.619776642522964
PFKFB1	0.618663887388508
RABD2A	0.618660246337278
XYLT1	0.618073638712307
Utp20	0.617990966610919
QSOX1	0.61791759336086
Tlcd4	0.617777211172585
vmp1	0.617236753151743
SFT2	0.617026691984632
PCMP-H5	0.616560886483706
SEC14L1	0.61642513741454
GRXC2	0.614714164485661
BT4	0.614608494248429
METAP2	0.614382291160921
GA3OX1	0.614054937217271
CYP707A4	0.61380307665458
DDB_G0288723	0.613103859458879
HS1	0.613084245216132
ETFB	0.613010017726369
RPL31	0.61236838725161
ATL2	0.611911559462009
RH57	0.61167846664281
At2g32630	0.611503435643323
PCMP-E42	0.61114359284605
MAD1L1	0.611040192623871
Slc38a3	0.610831605612665
crt	0.609654650270527
AGD5	0.608882231496525
KATNB1	0.608468239557317
ATHB-6	0.608289477407457
RBR	0.608263555452276
CYP90A1	0.608232790255051
BPC4	0.608001038458006
Os03g0268000	0.606615233374322
At3g03920	0.606149697381399
VPS26C	0.605933172589081
PCMP-H85	0.6059001372993
pdhC	0.605840253183764
tyrP	0.605479126966666
RABA3	0.605027339601067
FH8	0.604675531368912
ostc-a	0.604109232322704
PCMP-E69	0.603945900600835
HARBI1	0.603779632246206
IREG2	0.60292432044027
Ttll12	0.602338786252064
TBXAS1	0.601363876408956
PAA2	0.600448261357887
NBN	0.600320293152184
MAA3	0.599968637622266
At2g44660	0.599945182377995
SODB	0.599917589234126
PYL4	0.599771715403016
RER1A	0.59928272555949
tmed10	0.599187609178724
CML4	0.598968371969944
LEA5	0.597999369271094
HSR201	0.597277171199255
NAC021	0.597252577619499
Cirbp	0.597065109460562
PP2C38	0.596957648892427
UBP6	0.596912570121829
DTX6	0.59659600191452
At5g16590	0.595899100512792
NAC072	0.595742379696499
CTL2	0.595739579302369
Snapc3	0.595391531933848
ICR3	0.595230088292325
ATJ11	0.594337786449066
CG7694	0.594145915221918
ASP1	0.593654826565367
DTWD2	0.593606372476794
At5g42850	0.593245122658698
ADT3	0.592390868292069
XPO7	0.591134173825705
PTRH2	0.590910176235172
Rca	0.590098569766404
PUB38	0.589087847857984
PURA	0.588915583724536
KINB2	0.588726899192353
ABCG14	0.588018464137458
PMA4	0.587644539151355
VDAC2	0.587154385852354
GALT3	0.586919058364979
Cct8	0.586213824267751
LFS	0.585188662444288
GIP1	0.584737141818576
PVA13	0.584169073080057
ILL4	0.584051625365426
RANBP1C	0.582972801632555
ARMC6	0.582818626723375
menH	0.582645223506742
PIN1	0.582354010825054
XPB1	0.582134444635602
GDCSH	0.581639052004742
pyurf	0.581285665688998
ALA4	0.579111937247253
At2g47850	0.579090267303769
SVP	0.578217854581727
ASHH1	0.577880784063601
TIF3K1	0.577311380356711
FKBP15-1	0.576419926047616
GPX4	0.575693383633465
RH10	0.575477047851736
CFDP1	0.575262857118651
PUB16	0.574892581644077
EMB1687	0.574662824038461
ddost	0.573822568860168
KELP	0.573762081726028
trmB	0.573221524273366
CIPK6	0.572392112597658
PPR336	0.571951485690497
FAO2	0.571882941831606
pat2-k2	0.571696622278753
At1g67325	0.571352726925967
POLR1C	0.570921972122224
UBC26	0.570798402850184
NIFS1	0.570556333942107
ANK3	0.570508500113679
PHN1	0.569926468729202
CSLD3	0.569614736493161
ORP1D	0.569119231002418
APS1	0.56909011680268
ARF15	0.568800198417566
SCPL40	0.568717604441656
HB2	0.568415717239341
At1g05030	0.568404262492953
ANT	0.567982906295857
RTNLB22	0.566762406094762
v1g169424	0.566152601914522
DRAP1	0.566110170132783
znf511	0.5661093947539
Mgrn1	0.565737289044
gnd	0.565318314252484
ML5	0.565269283382225
Dctpp1	0.564842160961726
MCM7	0.564683812740877
SYP52	0.564174258316214
PUR5	0.563516725799418
OPR3	0.563254914652534
ERV1	0.562764527967041
AGD8	0.562735534191976
PRCP	0.562536918813087
GOS2	0.562475273877118
At2g39795	0.562402259610661
PDIL1-4	0.562363503899262
GTF2H4	0.560405957017104
SFT2D2	0.560216062102713
Gucd1	0.559442302119177
fhit	0.558801564683447
Mterf3	0.558783605167166
AS	0.557468921584118
GRP2	0.556782765171531
IAA9	0.556444988928973
SOG1	0.556327690045561
NAA60	0.556235263442495
DTX42	0.556140962964771
TOPP4	0.555877281935159
ERF053	0.555344600892875
prmC	0.55484623970766
SP1L1	0.554639280629365
thiD	0.554501300611231
Os04g0179200	0.553596770677322
Tmem87b	0.553202919444917
Coq8a	0.55271557624374
Pyroxd2	0.552439881308971
PIGU	0.552330434192456
PP2B11	0.552194365463726
mybl2	0.552124478164924
PIN5	0.552115427683694
IP5P11	0.552033684111701
OBF1	0.551696845061132
SRP14	0.551676631270899
SPBC651.09c	0.551560749458718
At1g18010	0.551442262486593
At5g47360	0.551400499822051
UGE1	0.550526616325123
HPTG1	0.550506692217259
SKOR	0.550367171146653
SYP124	0.550001808315045
ARI8	0.54994163313651
At3g05500	0.549899896592936
At4g00950	0.549831285641628
TMCO4	0.549562329653949
RPL7D	0.549374833682912
SPBP16F5.05c	0.549249277193562
phg1a	0.549194445625181
HUA1	0.548148675312902
SP1L2	0.547228125669744
UBI4	0.546076553789773
CIPK2	0.545990455482567
CXE1	0.54556546343875
psmg2	0.545468633944413
CHKB	0.54493054577763
PUB7	0.544593410722876
At4g33100	0.543455180875747
PIP2-1	0.543289461940015
RCOM_0699480	0.54290792475382
Os08g0126700	0.542684293935094
RPN1	0.54262183238061
PIX7	0.54243014200605
HMGCL	0.542317729310174
AAE3	0.542034104159541
At5g27460	0.541793977855011
DDB_G0276461	0.541749096704689
VPS2.2	0.541419550118599
TFIIA-S	0.540796072312022
4CL2	0.540022676765962
CRK42	0.53968474055248
PDX1	0.539413891341391
At2g25790	0.539311253337784
DGKI	0.539192503592744
LBD41	0.537462766192366
At5g25400	0.537378698232235
Ephx2	0.537166223667419
CSN8	0.535727375796576
SKIP16	0.535485894975827
lsg1	0.535264285777902
tal	0.535253249685833
rad54l2	0.53456032792858
IMDH1	0.534398567369371
CAF1-9	0.53404454166852
PLC4	0.533800993923369
SPL6	0.533360912243446
AAO	0.532159900239864
SPBC119.09c	0.532148152237914
TIM50	0.532122586429628
BRXL4	0.531303888549046
Ucp3	0.531230904645042
SKIP11	0.531168267774704
GN1	0.530935173459243
DAD1	0.529992311675282
DAR2	0.529711144909827
Os02g0520750	0.528961931484257
PERK2	0.528834163748682
DGAT2	0.527147641971899
ROM3	0.526845929361895
pctA	0.526427093438219
MCCB	0.526369912162192
VPS41	0.526244889280613
ERF5	0.525519894965285
RPL37C	0.525051796871122
PBL19	0.524426676716265
TOPBP1	0.524361076951146
At1g06840	0.523560163448942
rdiA	0.522772381031648
RCC2	0.522051823079005
RHD3	0.521846225575533
cox17	0.521493351269087
SFC1	0.521069485092449
BQ2027_MB2734	0.520627455130686
XERO1	0.520542116648417
ADF1	0.519924981549044
RPL7A	0.519007485315493
LQY1	0.518683061147161
At1g18250	0.51861671260959
LCA1	0.518234849126944
INRPK1	0.518181650781018
SPAC2G11.09	0.517956855543766
tmem214-a	0.5178335953882
PXG4	0.517790557895762
OTU4	0.517303432902771
PUB36	0.517052991922149
rbsK	0.516979173175541
nol10	0.516938318927292
lpxK	0.516894925020842
RRS1	0.516569977371412
eef1akmt1	0.515368385433484
PLL5	0.515245614885066
At5g64030	0.515079015016071
RAN3	0.515005814537884
TOR1L1	0.514880913427114
PPP2R3C	0.514738476187547
FTSZ1	0.514692476742436
Os07g0301200	0.514092701969262
SPAP11E10.01	0.514015125849851
IAA26	0.513871968149856
HOX10	0.513628105296082
MED31	0.513530927779664
At3g03070	0.51345825525609
PCMP-H35	0.512667354830001
At3g09470	0.511708192145577
ETR2	0.510803382811479
Mmtag2	0.510587959315712
Os04g0590900	0.510255682414965
UKL4	0.50881337454816
Cap2	0.50869808951906
CRK2	0.50817952052165
GATA28	0.508050427343408
At2g44510	0.508038103721151
stt3	0.507879101030919
IAA13	0.50782087519748
ERF4	0.507226327011922
DOF1.4	0.506554738702431
endoub	0.506226951539192
PCMP-H89	0.505861286584725
ytfP	0.505664404700931
Exd1	0.504689066230054
Engase	0.504649343539694
CDC25	0.504275489922913
CYTB5-E	0.50304356843144
WRAP73	0.502916101106563
CM1	0.502821942519332
At5g16450	0.502566741556401
PCMP-H87	0.501675875564901
let-413	0.501411146125731
ATG10	0.501123702712148
ilvD	0.500140745106886
NPSN13	0.49990147175054
At2g34840	0.499895435345071
HO2	0.499299839883546
At5g01610	0.498996277778784
HSP18.5	0.498279956016748
MJ0044	0.497576201956691
engB	0.497189759805388
Thoc3	0.496977037145352
MIA40	0.496710209626237
QCT	0.496500123227366
zcrb1	0.496285650058886
At4g34215	0.496192382217708
CHLREDRAFT_206018	0.496141382352802
NUDT10	0.495731204012304
Ergic3	0.495462136449366
At1g26850	0.495127038479521
Hm13	0.49435583187848
DOF4.6	0.494262500648714
SPAC5D6.04	0.493196977169237
NERD	0.492983850925458
At4g35180	0.492722610362326
utp20	0.491416780604383
DI19-1	0.490870432754291
YAB1	0.490113032717923
At1g09760	0.488796347971228
At4g22758	0.488475072230337
v1g238856	0.487864882989571
At1g75140	0.487490220844492
gpi3	0.48740358935213
ANTR6	0.486852293656368
SKIP30	0.486840430897785
PRA1A1	0.486627722053328
VAMP711	0.486103079749208
tif225	0.485453676967737
OFUT1	0.485063791557484
OTU1	0.485011816228378
WAXY	0.484364249544217
EFTS	0.482493989954047
CPK10	0.4811047112074
At1g28590	0.480726001940775
HSF24	0.480233935089841
Tbl2	0.480203326510124
DREB3	0.479280553897645
TOP6A	0.478539043209447
CYCU4-1	0.478147538263713
UCP3	0.478089699416892
FTCD	0.478011606591714
Txnl4a	0.477885863700999
At5g08100	0.477010203066204
VAMP725	0.476636699518218
PAA1	0.476005879854078
HIR1	0.475752823807883
ASK5	0.475305391415681
At2g17033	0.474900266912744
FAO1	0.474118414305439
Poll	0.473057674948194
YAB4	0.472124451473961
Xylt2	0.471646928637594
UBC24	0.470957320486854
TRAPPC3	0.470570523786443
HVA22A	0.470268134322999
GLO3	0.470241522634175
PHRF1	0.470201032066639
BHLH63	0.469776410500229
SYP32	0.469772259244831
CRY2	0.46953551747908
rsmB	0.468756746100704
Nub1	0.46856027989744
LRK10L-1.2	0.468407960225824
AMI1	0.468075571041399
rplV	0.467917245566849
ERD10	0.467290998294036
tlcd4-b	0.465968445506241
PRMT10	0.46553672752299
fdh	0.465533194224646
NIFU1	0.465117941130353
HSP21	0.464486553802779
RGLG2	0.464433009288152
STP14	0.464155604148205
DPM1	0.463876625889373
HSP17.5-M	0.463701108592652
MIMI_L728	0.463553998781575
CYP78A3	0.462475183016492
At5g58300	0.46237611715547
RPS28	0.462100199111062
ESF2	0.461318344727858
AIM1	0.461219321539298
ATL54	0.461164597143545
AN	0.46113007524939
NIT4B	0.460940630199237
COB	0.460532100329563
DGD2	0.460350600816828
At4g10260	0.46006001427137
LAX2	0.460033475141742
NGR_a02150	0.459938020939512
TIMM17B	0.459913584268861
At5g05010	0.459689376992439
ITN1	0.458780090478164
RPL24	0.458510477463929
At5g58620	0.458430549005965
ACX2	0.458071294627435
HSL2	0.457479052224356
nxt3	0.457469828230964
At2g28370	0.457014138237162
N6AMT1	0.456708819738995
APT1	0.456528017161178
RRN3	0.455460304358268
PUP10	0.455198220078143
RCOM_0711420	0.455030315009797
tmem205	0.454973926389278
ahsa	0.454913176166013
At3g28410	0.454828531848116
PRS4	0.454423720890224
SLC35F5	0.454199842752774
WRKY69	0.454184119781746
CTU2	0.453689381245577
CML41	0.453265193958916
Ppwd1	0.452971331178097
Naa11	0.452711089510541
COX11	0.452706942590162
PERK1	0.451955701029339
YTHDF2	0.451874665157857
KAS3B	0.451755033613843
GID1C	0.450971876475696
PRMT6	0.450750631313562
MARF1	0.450580924605264
At2g24580	0.449719122062813
BHLH13	0.449460978769568
UXT3	0.449225868103086
ECH	0.449085290451148
ycf20	0.448567655766692
NUDC	0.448556049284182
MIMI_R707	0.448515496027699
Os05g0567100	0.448426456702336
Rnf25	0.448261656848574
GGH2	0.447691380345166
FBX6	0.447525278557916
PGM1	0.446902964073656
PVA22	0.446315988554221
rpiA	0.44625796098082
Gpr107	0.446175190234526
Dmtf1	0.445823867225896
At4g08455	0.445527478192226
Gnl2	0.444705342794018
Api5	0.444363326252498
PPP1R7	0.444352032628468
CPK11	0.443942795379653
NUDT9	0.443750374612012
CAMK1	0.443407581105776
pucI	0.44337195029529
ORP4C	0.443249206710241
IPK2b	0.443090077489886
CLPB1	0.44281112066085
GRXC13	0.442734676858485
rplM	0.442571092859551
At4g26450	0.442146909358611
EEF2KMT	0.441970760509915
TUBG1	0.441817040616971
sfc4	0.441017985659877
CNR6	0.441006097722955
GSNAP	0.440968186158836
At1g55000	0.440874098093368
RPS13	0.440701446934251
RPN2	0.440585156381395
U2AF35B	0.440395089488595
CBL3	0.439863013395204
Arfrp1	0.439595030452525
PLT5	0.43940915171394
Gpatch8	0.439005849460223
CAD	0.438871305135878
At2g41900	0.438801712632074
At3g52300	0.438632160700463
PNSL1	0.43824041509727
PCMP-H12	0.438228846716884
KDSR	0.437757410489515
At5g18475	0.437473216644898
Cyth3	0.437400614884387
NDK4	0.437361958345079
DOF5.1	0.437227254602998
FACE1	0.437082991028988
SWEET17	0.436453701528104
RH18	0.43645173867207
BAG1	0.435623257181922
Os03g0586800	0.435398993755303
PDH2	0.435361507814987
rpsE	0.435281682998489
E4	0.435217989213976
DDB_G0284757	0.435113866095397
nhp2	0.434259694371181
S1FA1	0.433977589865993
COQ5	0.433793342360697
CIPK32	0.433134323795189
PPAN	0.433093594240247
Os01g0158000	0.432959882169758
R1A-3	0.432730895459211
ykwC	0.432629811147659
ANP3	0.432493761112912
CITRX	0.432418792869045
EVI5L	0.432358207775375
HEMH	0.432309159030145
ADS3	0.432277759060592
PI4KG5	0.431976265424678
RBP47B	0.43144046354969
ALG12	0.43119675069695
GRXS7	0.431131776139128
WDR43	0.430669702264705
FRI	0.430151832018042
guk1	0.430040481703143
DTX4	0.42922003033177
atad3	0.429057530717732
AMT3-1	0.428696161279435
Rab5if	0.428250857802959
At3g03100	0.427934270884717
ICMTB	0.427774673378176
SD22	0.42738371000111
At1g76200	0.426780159932284
PIS2	0.426561059091883
fdxB	0.426414866752596
SLC35F1	0.426142548855141
crtp1	0.426034938200207
ALDH7B4	0.425493596732762
RSL1D1	0.424966551319144
Fig4	0.424836441558773
PYL8	0.42482495793339
[truncated: 4,306 more rows]
