# Supplementary material for: Transcriptomic Leaf Profiling Reveals Differential Responses of the Two Most Traded Coffee Species to Elevated [CO2]
Source: Int J Mol Sci. 2020 Dec 3;21(23):9211. doi: 10.3390/ijms21239211 (PMC7730880; doi:10.3390/ijms21239211)
Supplement: Supplementary file 1 [file ijms-21-09211-s001.zip › Table S10.docx]

**Table A10.** Gene Set Enrichment Analysis (GSEA) of differentially expressed genes (DEGs), considering the response between CL153 and Icatu genotypes under aCO2 and eCO2. Significantly enriched Gene Ontology (GO) terms from each category – Biological Process (BP), Molecular Function (MF) and Cellular Component (CC) – and KEGG’s metabolic pathways. Values indicate the number of DEGs annotated with each term and pathway (Counts), normalized enrichment scores (NES), p-value and False Discovery Rate (FDR < 0.05).

| **Database** | | **ID** | **Decription** | **Counts** | **NES** | **p-value** | **FDR** |
| --- | --- | --- | --- | --- | --- | --- | --- |
|  | **~~aCO~~~~2~~** | | | | | | |
| ~~WikiPathways~~ | | ~~WP3661~~ | ~~genetic interactions between sugar and hormone signaling~~ | ~~12~~ | ~~1.67~~ | ~~2.15E-02~~ | ~~2.90E-02~~ |
|  | **eCO2** | | | | | | |
| GO:MF | | GO:0016679 | oxidoreductase activity, acting on diphenols and related substances as donors | 10 | 1.90 | <0.001 | 3.23E-02 |
| GO:CC | | GO:0042170 | plastid membrane | 47 | -1.86 | <0.001 | 1.11E-02 |
