# Supplementary figures and images for: Transcriptomic Leaf Profiling Reveals Differential Responses of the Two Most Traded Coffee Species to Elevated [CO2]
Source: MDPI journal article supplement (doi:10.3390/ijms21239211), 2020-12-03

**A**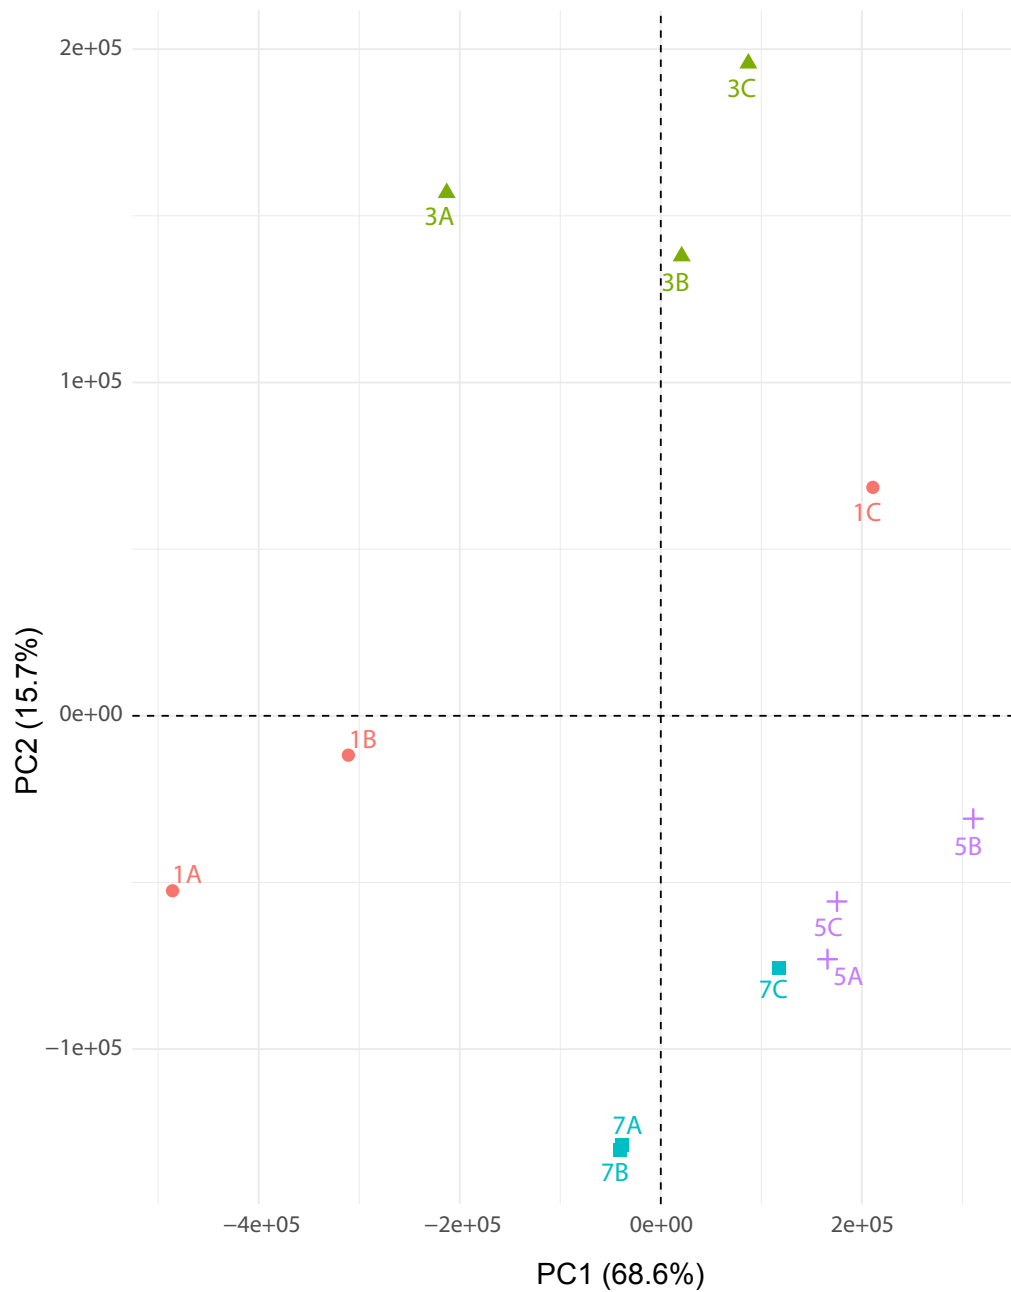**B**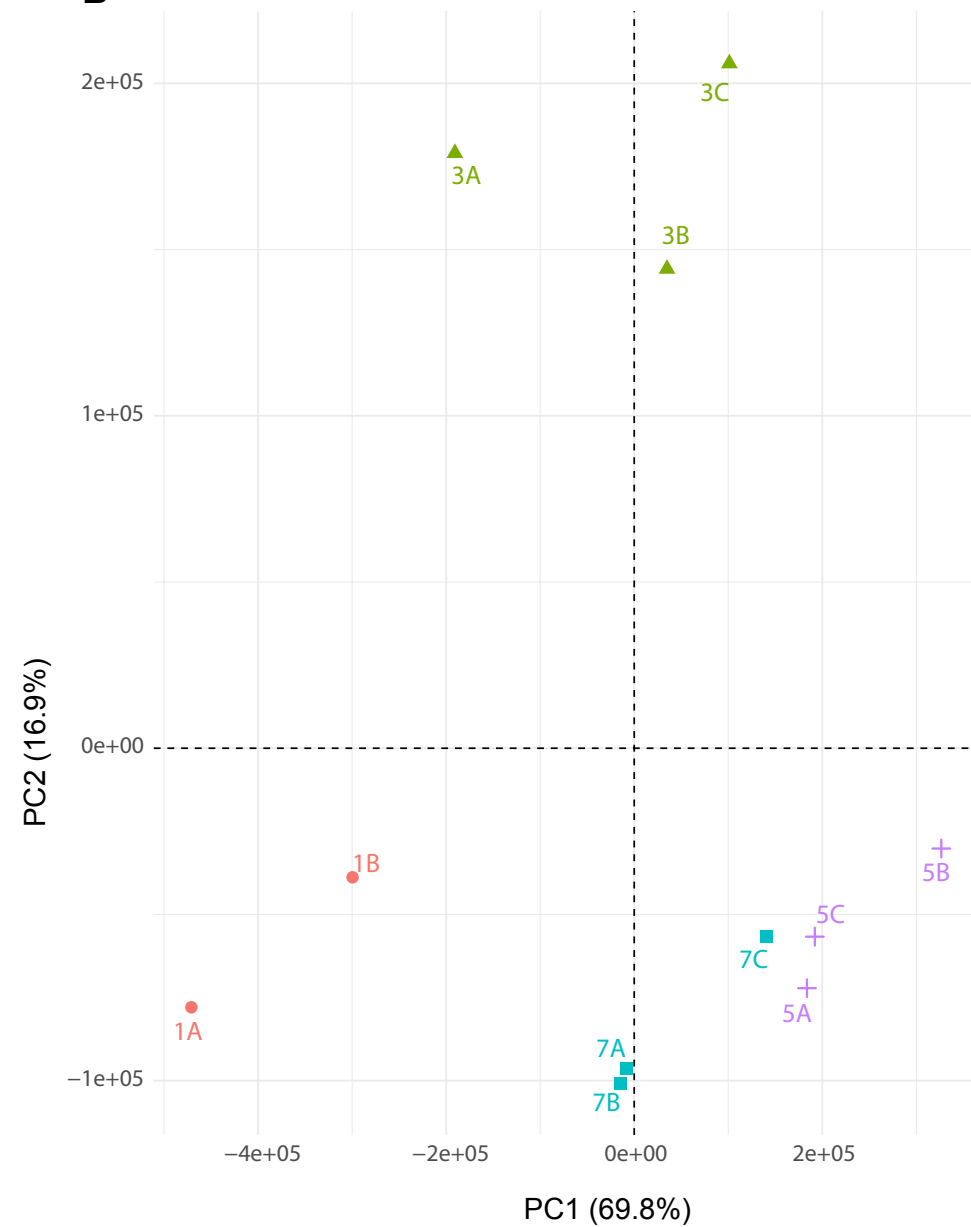

Supplement: s1 [file s1]
